# Supplementary material for: Expression Levels of Therapeutic Targets as Indicators of Sensitivity to Targeted Therapeutics
Source: Oxford University Press journal article supplement (doi:10.1158/1535-7163.mct-19-0273), 2019-08-29
Supplement: 15357163mct190273-sup-218852_2_supp_5690689_pvr7cp.xlsx [file 15357163mct190273-sup-218852_2_supp_5690689_pvr7cp.xlsx]

## Sheet: readme
Supplementary Table 6a: Spearman correlation values between drug sensitivity and target expression for 86 drugs common between GDSC and CTRP. Supplementary Table 6b: Correlation matrix comparing gene expression values. There are 558 cell lines and 15,934 genes common between both the datasets. Calculated 558x 558 – Correlation matrix comparing gene expression values for 15,934 genes in one cell l…

## Sheet: 6a
Drug	Drug Alias	Target	Target Alias	Cor.coef_GDSC	No. of permutations better than actual correlation GDSC	Cor.coef_CTRP	No. of permutations better than actual correlation CTRP	Concordant	Concordance
Nutlin-3a_(-)	nutlin-3	MDM2		0.39	0	0.46	0	yes	significantly_correlated_in_GDSC_significantly_correlated_in_CTRP
Belinostat		HDAC2		0.24	0	0.29	0	yes	significantly_correlated_in_GDSC_significantly_correlated_in_CTRP
Navitoclax		BCL2		0.31	0	0.28	0	yes	significantly_correlated_in_GDSC_significantly_correlated_in_CTRP
Vorinostat		HDAC2		0.27	0	0.28	0	yes	significantly_correlated_in_GDSC_significantly_correlated_in_CTRP
Etoposide		TOP2A		0.15	0	0.28	0	yes	significantly_correlated_in_GDSC_significantly_correlated_in_CTRP
Gemcitabine		TYMS		0.14	0	0.28	0	yes	significantly_correlated_in_GDSC_significantly_correlated_in_CTRP
Linsitinib		INSR		0.11	0	0.28	0	yes	significantly_correlated_in_GDSC_significantly_correlated_in_CTRP
Erlotinib		ERBB2		0.3	0	0.27	0	yes	significantly_correlated_in_GDSC_significantly_correlated_in_CTRP
PHA-793887		CDK9		0.17	0	0.25	0	yes	significantly_correlated_in_GDSC_significantly_correlated_in_CTRP
Erlotinib		EGFR		0.31	0	0.23	0	yes	significantly_correlated_in_GDSC_significantly_correlated_in_CTRP
PIK-93		PIK3CG		0.31	0	0.23	0	yes	significantly_correlated_in_GDSC_significantly_correlated_in_CTRP
JQ1	JQ-1	BRD2		0.1	0	0.23	0	yes	significantly_correlated_in_GDSC_significantly_correlated_in_CTRP
Vorinostat		HDAC6		0.2	0	0.22	0	yes	significantly_correlated_in_GDSC_significantly_correlated_in_CTRP
Dasatinib		EPHA2		0.38	0	0.21	0	yes	significantly_correlated_in_GDSC_significantly_correlated_in_CTRP
Belinostat		HDAC6		0.16	0	0.21	0	yes	significantly_correlated_in_GDSC_significantly_correlated_in_CTRP
AZD7762		CHEK1		0.12	0	0.21	0	yes	significantly_correlated_in_GDSC_significantly_correlated_in_CTRP
Afatinib		ERBB2		0.46	0	0.2	0	yes	significantly_correlated_in_GDSC_significantly_correlated_in_CTRP
TPCA-1		IKBKB		0.21	0	0.2	0	yes	significantly_correlated_in_GDSC_significantly_correlated_in_CTRP
Dactolisib	nvp-bez235	PIK3CG		0.11	0	0.2	0	yes	significantly_correlated_in_GDSC_significantly_correlated_in_CTRP
Idelalisib	CAL-101	PIK3CD		0.13	0	0.19	0	yes	significantly_correlated_in_GDSC_significantly_correlated_in_CTRP
Fedratinib	tg-101348	JAK2		0.1	0	0.19	0	yes	significantly_correlated_in_GDSC_significantly_correlated_in_CTRP
Afatinib		EGFR		0.43	0	0.17	0	yes	significantly_correlated_in_GDSC_significantly_correlated_in_CTRP
BMS-345541		IKBKB		0.17	0	0.17	0	yes	significantly_correlated_in_GDSC_significantly_correlated_in_CTRP
PI-103		PRKDC		0.17	0	0.17	0	yes	significantly_correlated_in_GDSC_significantly_correlated_in_CTRP
Axitinib		PDGFRA		0.15	0	0.17	0	yes	significantly_correlated_in_GDSC_significantly_correlated_in_CTRP
Vorinostat		HDAC1		0.14	0	0.17	0	yes	significantly_correlated_in_GDSC_significantly_correlated_in_CTRP
BMS-536924		IGF1R		0.25	0	0.16	0	yes	significantly_correlated_in_GDSC_significantly_correlated_in_CTRP
Sunitinib		CSF1R		0.18	0	0.15	0	yes	significantly_correlated_in_GDSC_significantly_correlated_in_CTRP
Pazopanib		PDGFRA		0.12	0	0.15	0	yes	significantly_correlated_in_GDSC_significantly_correlated_in_CTRP
PI-103		PIK3CG		0.28	0	0.14	0	yes	significantly_correlated_in_GDSC_significantly_correlated_in_CTRP
PHA-793887		CDK1		0.15	0	0.14	0	yes	significantly_correlated_in_GDSC_significantly_correlated_in_CTRP
Axitinib		PDGFRB		0.21	0	0.13	0	yes	significantly_correlated_in_GDSC_significantly_correlated_in_CTRP
AZD6482		PIK3CD		0.16	0	0.13	0	yes	significantly_correlated_in_GDSC_significantly_correlated_in_CTRP
OSI-027		MTOR		0.12	0	0.13	0	yes	significantly_correlated_in_GDSC_significantly_correlated_in_CTRP
BMS-536924		INSR		0.09	0	0.13	0	yes	significantly_correlated_in_GDSC_significantly_correlated_in_CTRP
Lapatinib		ERBB2		0.41	0	0.12	0	yes	significantly_correlated_in_GDSC_significantly_correlated_in_CTRP
BMS-754807		IGF1R		0.26	0	0.12	0	yes	significantly_correlated_in_GDSC_significantly_correlated_in_CTRP
Gefitinib		EGFR		0.42	0	0.11	0	yes	significantly_correlated_in_GDSC_significantly_correlated_in_CTRP
PI-103		PIK3CA		0.14	0	0.11	0	yes	significantly_correlated_in_GDSC_significantly_correlated_in_CTRP
Linifanib		FLT4		-0.11	0	0.19	0	yes	significantly_anticorrelated_in_GDSC_significantly_correlated_in_CTRP
Veliparib		PARP1		-0.24	0	0.11	0	yes	significantly_anticorrelated_in_GDSC_significantly_correlated_in_CTRP
SNX-2112		HSP90B1		-0.1	0	-0.15	0	yes	significantly_anticorrelated_in_GDSC_significantly_anticorrelated_in_CTRP
PI-103		PIK3CB		-0.18	0	-0.17	0	yes	significantly_anticorrelated_in_GDSC_significantly_anticorrelated_in_CTRP
TW_37	tw-37	BCL2L1		-0.18	0	-0.21	0	yes	significantly_anticorrelated_in_GDSC_significantly_anticorrelated_in_CTRP
Bortezomib		PSMB5		-0.2	0	-0.29	0	yes	significantly_anticorrelated_in_GDSC_significantly_anticorrelated_in_CTRP
Daporinad		NAMPT		-0.27	0	-0.32	0	yes	significantly_anticorrelated_in_GDSC_significantly_anticorrelated_in_CTRP
Linifanib		KIT		-0.06	27	-0.01	296	yes	not_significant_in_GDSC_not_significant_in_CTRP
PLX-4720		BRAF		-0.07	9	-0.01	351	yes	not_significant_in_GDSC_not_significant_in_CTRP
Navitoclax		BCL2L1		-0.01	339	-0.02	249	yes	not_significant_in_GDSC_not_significant_in_CTRP
Parthenolide		HDAC1		-0.01	355	-0.02	242	yes	not_significant_in_GDSC_not_significant_in_CTRP
CHIR-99021		GSK3B		-0.03	132	-0.02	267	yes	not_significant_in_GDSC_not_significant_in_CTRP
Veliparib		PARP2		-0.09	3	-0.03	173	yes	not_significant_in_GDSC_not_significant_in_CTRP
Axitinib		KDR		-0.01	331	-0.04	103	yes	not_significant_in_GDSC_not_significant_in_CTRP
Tozasertib	vx-680	AURKA		-0.01	391	-0.04	345	yes	not_significant_in_GDSC_not_significant_in_CTRP
Pictilisib	GDC-0941	PIK3CB		-0.02	225	-0.06	34	yes	not_significant_in_GDSC_not_significant_in_CTRP
Pazopanib		KDR		-0.02	240	-0.06	37	yes	not_significant_in_GDSC_not_significant_in_CTRP
SNX-2112		HSP90AA1		-0.08	4	-0.06	30	yes	not_significant_in_GDSC_not_significant_in_CTRP
ZSTK474		PIK3CB		-0.07	9	-0.07	21	yes	not_significant_in_GDSC_not_significant_in_CTRP
Dactolisib	nvp-bez235	PIK3CB		-0.05	58	-0.12	2	yes	not_significant_in_GDSC_not_significant_in_CTRP
PHA-793887		CDK7		-0.11	2	-0.15	1	yes	not_significant_in_GDSC_not_significant_in_CTRP
MG-132		PSMB1		-0.13	3	0.16	2	yes	not_significant_in_GDSC_not_significant_in_CTRP
Tozasertib	vx-680	AURKC		-0.01	378	0.14	96	yes	not_significant_in_GDSC_not_significant_in_CTRP
Temsirolimus		MTOR		-0.02	212	0.14	3	yes	not_significant_in_GDSC_not_significant_in_CTRP
Sunitinib		PDGFRA		-0.01	353	0.13	2	yes	not_significant_in_GDSC_not_significant_in_CTRP
Pazopanib		CSF1R		-0.11	1	0.12	2	yes	not_significant_in_GDSC_not_significant_in_CTRP
MG-132		PSMB2		-0.04	198	0.11	20	yes	not_significant_in_GDSC_not_significant_in_CTRP
Sunitinib		KIT		-0.09	28	0.11	1	yes	not_significant_in_GDSC_not_significant_in_CTRP
Pazopanib		FLT3		-0.01	320	0.08	7	yes	not_significant_in_GDSC_not_significant_in_CTRP
Pazopanib		KIT		-0.04	80	0.08	5	yes	not_significant_in_GDSC_not_significant_in_CTRP
Pazopanib		FLT1		-0.05	44	0.08	6	yes	not_significant_in_GDSC_not_significant_in_CTRP
Dabrafenib		BRAF		-0.09	4	0.08	54	yes	not_significant_in_GDSC_not_significant_in_CTRP
Dasatinib		LCK		-0.07	57	0.07	17	yes	not_significant_in_GDSC_not_significant_in_CTRP
Sorafenib		KIT		-0.08	53	0.07	15	yes	not_significant_in_GDSC_not_significant_in_CTRP
MK-2206		AKT1		-0.01	348	0.06	42	yes	not_significant_in_GDSC_not_significant_in_CTRP
Sorafenib		FLT1		-0.01	409	0.06	43	yes	not_significant_in_GDSC_not_significant_in_CTRP
QS11	qs-11	ARFGAP1		-0.04	87	0.06	174	yes	not_significant_in_GDSC_not_significant_in_CTRP
Dactolisib	nvp-bez235	MTOR		-0.04	107	0.06	66	yes	not_significant_in_GDSC_not_significant_in_CTRP
NVP-TAE684		ALK		-0.04	196	0.06	35	yes	not_significant_in_GDSC_not_significant_in_CTRP
Tamoxifen		ESR2		-0.05	47	0.06	42	yes	not_significant_in_GDSC_not_significant_in_CTRP
Bexarotene		RXRG		-0.06	31	0.06	47	yes	not_significant_in_GDSC_not_significant_in_CTRP
Bortezomib		PSMB1		-0.13	6	0.06	27	yes	not_significant_in_GDSC_not_significant_in_CTRP
Cabozantinib		RET		-0.05	48	0.05	84	yes	not_significant_in_GDSC_not_significant_in_CTRP
Gefitinib		AKT1		-0.05	58	0.05	58	yes	not_significant_in_GDSC_not_significant_in_CTRP
PHA-793887		CDK4		-0.06	30	0.05	55	yes	not_significant_in_GDSC_not_significant_in_CTRP
CHIR-99021		GSK3A		-0.07	8	0.05	55	yes	not_significant_in_GDSC_not_significant_in_CTRP
MG-132		PSMD1		-0.01	365	0.04	214	yes	not_significant_in_GDSC_not_significant_in_CTRP
Tivozanib		FLT3		-0.01	306	0.03	154	yes	not_significant_in_GDSC_not_significant_in_CTRP
Sorafenib		BRAF		-0.07	62	0.03	167	yes	not_significant_in_GDSC_not_significant_in_CTRP
Tivozanib		FLT1		-0.08	7	0.03	187	yes	not_significant_in_GDSC_not_significant_in_CTRP
Imatinib		RET		-0.06	92	0.02	256	yes	not_significant_in_GDSC_not_significant_in_CTRP
Imatinib		BCR		-0.05	138	0.01	346	yes	not_significant_in_GDSC_not_significant_in_CTRP
Selisistat	EX-527	SIRT1		-0.06	22	0	1000	yes	not_significant_in_GDSC_not_significant_in_CTRP
Imatinib		PDGFRB		0.05	137	-0.01	341	yes	not_significant_in_GDSC_not_significant_in_CTRP
Trametinib		MAP2K1		0.02	234	-0.01	366	yes	not_significant_in_GDSC_not_significant_in_CTRP
Tivozanib		KDR		0.01	347	-0.01	336	yes	not_significant_in_GDSC_not_significant_in_CTRP
Sorafenib		KDR		0.02	317	-0.02	275	yes	not_significant_in_GDSC_not_significant_in_CTRP
Bexarotene		RXRA		0.09	7	-0.03	166	yes	not_significant_in_GDSC_not_significant_in_CTRP
Cabozantinib		FLT3		0.06	18	-0.03	127	yes	not_significant_in_GDSC_not_significant_in_CTRP
Masitinib		PDGFRB		0.07	10	-0.04	139	yes	not_significant_in_GDSC_not_significant_in_CTRP
Bosutinib		SRC		0.03	136	-0.04	100	yes	not_significant_in_GDSC_not_significant_in_CTRP
Selumetinib		MAP2K1		0.01	327	-0.04	113	yes	not_significant_in_GDSC_not_significant_in_CTRP
Nilotinib		BCR		0.01	328	-0.04	101	yes	not_significant_in_GDSC_not_significant_in_CTRP
OSI-930		KDR		0.1	1	-0.05	77	yes	not_significant_in_GDSC_not_significant_in_CTRP
Bosutinib		ABL1		0.01	332	-0.05	68	yes	not_significant_in_GDSC_not_significant_in_CTRP
AZD6482		PIK3CB		0.02	215	-0.06	50	yes	not_significant_in_GDSC_not_significant_in_CTRP
MG-132		RPN1	PSMD2	0.01	395	-0.06	139	yes	not_significant_in_GDSC_not_significant_in_CTRP
TGX221	tgx-221	PIK3CB		0.15	1	-0.07	21	yes	not_significant_in_GDSC_not_significant_in_CTRP
Entinostat		HDAC3		0.11	11	-0.07	17	yes	not_significant_in_GDSC_not_significant_in_CTRP
YK-4-279	yk 4-279	ETV1		0.03	144	-0.08	12	yes	not_significant_in_GDSC_not_significant_in_CTRP
GW843682X	GW-843682X	PLK3		0.01	362	-0.08	11	yes	not_significant_in_GDSC_not_significant_in_CTRP
Olaparib		PARP3		0.04	69	-0.1	3	yes	not_significant_in_GDSC_not_significant_in_CTRP
Linifanib		KDR		0.01	352	-0.1	3	yes	not_significant_in_GDSC_not_significant_in_CTRP
Tozasertib	vx-680	AURKB		0.09	26	0.26	2	yes	not_significant_in_GDSC_not_significant_in_CTRP
Sepantronium_bromide	ym-155	BIRC5		0.07	12	0.13	2	yes	not_significant_in_GDSC_not_significant_in_CTRP
JQ1	JQ-1	BRD3		0.04	73	0.12	1	yes	not_significant_in_GDSC_not_significant_in_CTRP
Saracatinib		SRC		0.16	1	0.11	1	yes	not_significant_in_GDSC_not_significant_in_CTRP
Belinostat		HDAC8		0.08	5	0.11	9	yes	not_significant_in_GDSC_not_significant_in_CTRP
Dactolisib	nvp-bez235	PIK3CA		0.04	95	0.11	3	yes	not_significant_in_GDSC_not_significant_in_CTRP
Sorafenib		FLT3		0.04	194	0.11	2	yes	not_significant_in_GDSC_not_significant_in_CTRP
Sunitinib		FLT3		0.12	8	0.1	1	yes	not_significant_in_GDSC_not_significant_in_CTRP
Entinostat		HDAC1		0.09	22	0.1	1	yes	not_significant_in_GDSC_not_significant_in_CTRP
SN-38		TOP1		0.05	53	0.1	5	yes	not_significant_in_GDSC_not_significant_in_CTRP
BMS-345541		IKBKA	CHUK	0.11	3	0.09	2	yes	not_significant_in_GDSC_not_significant_in_CTRP
Imatinib		PDGFRA		0.05	116	0.08	8	yes	not_significant_in_GDSC_not_significant_in_CTRP
Sorafenib		RAF1		0.04	184	0.08	16	yes	not_significant_in_GDSC_not_significant_in_CTRP
Masitinib		PDGFRA		0.08	9	0.07	25	yes	not_significant_in_GDSC_not_significant_in_CTRP
Sunitinib		PDGFRB		0.08	41	0.07	11	yes	not_significant_in_GDSC_not_significant_in_CTRP
Ruxolitinib		JAK1		0.06	25	0.07	22	yes	not_significant_in_GDSC_not_significant_in_CTRP
JQ1	JQ-1	BRDT		0.02	213	0.07	17	yes	not_significant_in_GDSC_not_significant_in_CTRP
Axitinib		FLT3		0.02	239	0.07	20	yes	not_significant_in_GDSC_not_significant_in_CTRP
Entinostat		HDAC8		0.11	11	0.06	41	yes	not_significant_in_GDSC_not_significant_in_CTRP
AZD8055		MTOR		0.06	32	0.06	42	yes	not_significant_in_GDSC_not_significant_in_CTRP
Tanespimycin		HSP90AA1		0.11	1	0.05	47	yes	not_significant_in_GDSC_not_significant_in_CTRP
Belinostat		HDAC3		0.09	1	0.05	143	yes	not_significant_in_GDSC_not_significant_in_CTRP
UNC0638		EHMT1		0.07	14	0.05	64	yes	not_significant_in_GDSC_not_significant_in_CTRP
Nilotinib		ABL1		0.05	63	0.05	65	yes	not_significant_in_GDSC_not_significant_in_CTRP
Axitinib		FLT1		0.03	158	0.05	58	yes	not_significant_in_GDSC_not_significant_in_CTRP
Dasatinib		ABL1		0.14	2	0.04	108	yes	not_significant_in_GDSC_not_significant_in_CTRP
Pictilisib	GDC-0941	PIK3CA		0.03	153	0.04	106	yes	not_significant_in_GDSC_not_significant_in_CTRP
Tubastatin_A	tubastatin a	HDAC8		0.05	53	0.03	242	yes	not_significant_in_GDSC_not_significant_in_CTRP
Cabozantinib		KDR		0.03	150	0.03	163	yes	not_significant_in_GDSC_not_significant_in_CTRP
Tamoxifen		ESR1		0.01	359	0.03	159	yes	not_significant_in_GDSC_not_significant_in_CTRP
Selumetinib		MAP2K2		0.02	236	0.02	230	yes	not_significant_in_GDSC_not_significant_in_CTRP
Vorinostat		HDAC3		0.09	2	0.01	354	yes	not_significant_in_GDSC_not_significant_in_CTRP
Quizartinib		FLT3		0.08	3	0.01	330	yes	not_significant_in_GDSC_not_significant_in_CTRP
Sunitinib		KDR		0.08	47	0.01	317	yes	not_significant_in_GDSC_not_significant_in_CTRP
Imatinib		KIT		0.07	65	0.01	340	yes	not_significant_in_GDSC_not_significant_in_CTRP
OSI-930		KIT		0.05	41	0.01	363	yes	not_significant_in_GDSC_not_significant_in_CTRP
Trametinib		MAP2K2		0.03	125	0.01	377	yes	not_significant_in_GDSC_not_significant_in_CTRP
Obatoclax_Mesylate	obatoclax	MCL1		0.05	54	0	1000	yes	not_significant_in_GDSC_not_significant_in_CTRP
Nilotinib		KIT		0.01	362	0	1000	yes	not_significant_in_GDSC_not_significant_in_CTRP
Rapamycin	sirolimus	MTOR		0	1000	0.1	2	yes	not_significant_in_GDSC_not_significant_in_CTRP
Sunitinib		FLT4		0	1000	0.09	4	yes	not_significant_in_GDSC_not_significant_in_CTRP
Bexarotene		RXRB		0	1000	0.05	67	yes	not_significant_in_GDSC_not_significant_in_CTRP
SB52334	sb-525334	TGFBR1		0	1000	0.01	325	yes	not_significant_in_GDSC_not_significant_in_CTRP
Saracatinib		ABL1		0.2	0	-0.02	238	no	significantly_correlated_in_GDSC_not_significant_in_CTRP
Tubastatin_A	tubastatin a	HDAC6		0.13	0	0.17	1	no	significantly_correlated_in_GDSC_not_significant_in_CTRP
Belinostat		HDAC1		0.15	0	0.16	1	no	significantly_correlated_in_GDSC_not_significant_in_CTRP
PI-103		PIK3CD		0.19	0	0.11	1	no	significantly_correlated_in_GDSC_not_significant_in_CTRP
PI-103		MTOR		0.14	0	0.1	1	no	significantly_correlated_in_GDSC_not_significant_in_CTRP
Pazopanib		PDGFRB		0.14	0	0.1	2	no	significantly_correlated_in_GDSC_not_significant_in_CTRP
Linsitinib		IGF1R		0.29	0	0.09	5	no	significantly_correlated_in_GDSC_not_significant_in_CTRP
ZSTK474		PIK3CG		0.26	0	0.09	2	no	significantly_correlated_in_GDSC_not_significant_in_CTRP
Dasatinib		PDGFRB		0.15	0	0.08	5	no	significantly_correlated_in_GDSC_not_significant_in_CTRP
Masitinib		KIT		0.13	0	0.06	37	no	significantly_correlated_in_GDSC_not_significant_in_CTRP
Lapatinib		EGFR		0.37	0	0.05	64	no	significantly_correlated_in_GDSC_not_significant_in_CTRP
Dasatinib		SRC		0.19	0	0.05	80	no	significantly_correlated_in_GDSC_not_significant_in_CTRP
Tubastatin_A	tubastatin a	HDAC1		0.12	0	0.05	120	no	significantly_correlated_in_GDSC_not_significant_in_CTRP
Imatinib		ABL1		0.24	0	0.03	163	no	significantly_correlated_in_GDSC_not_significant_in_CTRP
Sorafenib		PDGFRB		0.16	0	0.03	170	no	significantly_correlated_in_GDSC_not_significant_in_CTRP
ZSTK474		PIK3CD		0.11	0	0.01	343	no	significantly_correlated_in_GDSC_not_significant_in_CTRP
Dactolisib	nvp-bez235	PIK3CD		0.24	0	0	1000	no	significantly_correlated_in_GDSC_not_significant_in_CTRP
Pictilisib	GDC-0941	PIK3CD		0.12	0	0	1000	no	significantly_correlated_in_GDSC_not_significant_in_CTRP
MG-132		PSMB5		-0.18	0	-0.06	121	no	significantly_anticorrelated_in_GDSC_not_significant_in_CTRP
Dasatinib		KIT		-0.19	0	-0.08	6	no	significantly_anticorrelated_in_GDSC_not_significant_in_CTRP
PHA-793887		CDK5		-0.12	0	-0.1	1	no	significantly_anticorrelated_in_GDSC_not_significant_in_CTRP
Linifanib		CSF1R		-0.09	0	0.07	15	no	significantly_anticorrelated_in_GDSC_not_significant_in_CTRP
Docetaxel		TUBB1		-0.2	0	0.07	85	no	significantly_anticorrelated_in_GDSC_not_significant_in_CTRP
Linifanib		FLT1		-0.13	0	0.04	105	no	significantly_anticorrelated_in_GDSC_not_significant_in_CTRP
Olaparib		PARP1		-0.05	44	0.31	0	no	not_significant_in_GDSC_significantly_correlated_in_CTRP
Serdemetan		MDM2		-0.01	342	0.28	0	no	not_significant_in_GDSC_significantly_correlated_in_CTRP
YK-4-279	yk 4-279	DHX9		-0.08	8	0.19	0	no	not_significant_in_GDSC_significantly_correlated_in_CTRP
Entinostat		HDAC6		-0.01	368	0.16	0	no	not_significant_in_GDSC_significantly_correlated_in_CTRP
Linifanib		FLT3		-0.05	47	0.13	0	no	not_significant_in_GDSC_significantly_correlated_in_CTRP
Tivozanib		FLT4		-0.04	76	0.11	0	no	not_significant_in_GDSC_significantly_correlated_in_CTRP
Paclitaxel		TUBB1		-0.09	44	0.11	0	no	not_significant_in_GDSC_significantly_correlated_in_CTRP
Obatoclax_Mesylate	obatoclax	BCL2		0.06	24	0.28	0	no	not_significant_in_GDSC_significantly_correlated_in_CTRP
Entinostat		HDAC2		0.01	379	0.23	0	no	not_significant_in_GDSC_significantly_correlated_in_CTRP
TW_37	tw-37	BCL2		0.01	332	0.22	0	no	not_significant_in_GDSC_significantly_correlated_in_CTRP
Doxorubicin		TOP2A		0.03	159	0.21	0	no	not_significant_in_GDSC_significantly_correlated_in_CTRP
Gemcitabine		RRM1		0.02	235	0.21	0	no	not_significant_in_GDSC_significantly_correlated_in_CTRP
BI-2536		PLK1		0.02	338	0.2	0	no	not_significant_in_GDSC_significantly_correlated_in_CTRP
PAC-1		CASP3		0.11	3	0.19	0	no	not_significant_in_GDSC_significantly_correlated_in_CTRP
Ruxolitinib		JAK2		0.04	94	0.19	0	no	not_significant_in_GDSC_significantly_correlated_in_CTRP
YK-4-279	yk 4-279	ERG		0.01	322	0.19	0	no	not_significant_in_GDSC_significantly_correlated_in_CTRP
JQ1	JQ-1	BRD4		0.08	3	0.17	0	no	not_significant_in_GDSC_significantly_correlated_in_CTRP
MK-2206		AKT2		0.08	8	0.17	0	no	not_significant_in_GDSC_significantly_correlated_in_CTRP
PHA-793887		CDK2		0.03	138	0.17	0	no	not_significant_in_GDSC_significantly_correlated_in_CTRP
Sorafenib		FLT4		0.02	336	0.16	0	no	not_significant_in_GDSC_significantly_correlated_in_CTRP
Pevonedistat		NAE1		0.05	63	0.15	0	no	not_significant_in_GDSC_significantly_correlated_in_CTRP
Sunitinib		FLT1		0.09	33	0.14	0	no	not_significant_in_GDSC_significantly_correlated_in_CTRP
KU-55933		ATM		0.05	50	0.14	0	no	not_significant_in_GDSC_significantly_correlated_in_CTRP
GW843682X	GW-843682X	PLK1		0.05	130	0.14	0	no	not_significant_in_GDSC_significantly_correlated_in_CTRP
UNC0638		EHMT2		0.08	4	0.13	0	no	not_significant_in_GDSC_significantly_correlated_in_CTRP
Olaparib		PARP2		0.01	322	0.13	0	no	not_significant_in_GDSC_significantly_correlated_in_CTRP
Pictilisib	GDC-0941	PIK3CG		0.1	1	0.12	0	no	not_significant_in_GDSC_significantly_correlated_in_CTRP
Crizotinib		ALK		0.02	340	0.11	0	no	not_significant_in_GDSC_significantly_correlated_in_CTRP
Axitinib		KIT		0.01	349	0.11	0	no	not_significant_in_GDSC_significantly_correlated_in_CTRP
Sorafenib		RET		0.01	385	0.11	0	no	not_significant_in_GDSC_significantly_correlated_in_CTRP
Cabozantinib		MET		-0.09	2	-0.2	0	no	not_significant_in_GDSC_significantly_anticorrelated_in_CTRP
Obatoclax_Mesylate	obatoclax	BCL2L1		-0.03	155	-0.24	0	no	not_significant_in_GDSC_significantly_anticorrelated_in_CTRP
BI-2536		PLK2		-0.05	126	-0.49	0	no	not_significant_in_GDSC_significantly_anticorrelated_in_CTRP
AZD7762		CHEK2	CDS1	0.1	2	-0.26	0	no	not_significant_in_GDSC_significantly_anticorrelated_in_CTRP
Crizotinib		MET		0.01	370	-0.36	0	no	not_significant_in_GDSC_significantly_anticorrelated_in_CTRP
BI-2536		PLK3		0	1000	-0.14	0	no	not_significant_in_GDSC_significantly_anticorrelated_in_CTRP
Navitoclax		BCL2L2		gene not measured	gene not measured	-0.19	0	no	not_measured_in_GDSC_significantly_correlated_in_CTRP

## Sheet: 6b
Dataset_cell_line	CTRP_697	CTRP_5637	CTRP_2313287	CTRP_22rv1	CTRP_42mgba	CTRP_639v	CTRP_647v	CTRP_769p	CTRP_786o	CTRP_8305c	CTRP_8505c	CTRP_8mgba	CTRP_a101d	CTRP_a172	CTRP_a204	CTRP_a2058	CTRP_a253	CTRP_a2780	CTRP_a375	CTRP_a3kaw	CTRP_a498	CTRP_a4fuk	CTRP_a549	CTRP_a673	CTRP_achn	CTRP_ags	CTRP_allsil	CTRP_am38	CTRP_amo1	CTRP_an3ca	CTRP_aspc1	CTRP_au565	CTRP_bcpap	CTRP_becker	CTRP_ben	CTRP_bftc905	CTRP_bftc909	CTRP_bht101	CTRP_bhy	CTRP_bicr22	CTRP_bicr31	CTRP_bl41	CTRP_bt20	CTRP_bt474	CTRP_bt549	CTRP_bv173	CTRP_bxpc3	CTRP_c2bbe1	CTRP_c32
GDSC_697	0.86546	0.72229	0.71	0.72116	0.7262	0.75519	0.72823	0.72992	0.7364	0.72119	0.7302	0.72209	0.71593	0.72411	0.72542	0.74103	0.70755	0.74115	0.74319	0.73804	0.71227	0.74653	0.71756	0.73466	0.71402	0.71904	0.77777	0.72995	0.76335	0.74259	0.68535	0.70817	0.7029	0.72621	0.67393	0.71793	0.72831	0.7091	0.6862	0.67939	0.68792	0.77627	0.72354	0.72581	0.7336	0.80617	0.69718	0.71089	0.71907
GDSC_5637	0.71742	0.8737	0.76639	0.74969	0.7749	0.79429	0.82367	0.78522	0.80012	0.79664	0.8007	0.77781	0.77503	0.78043	0.74742	0.78407	0.80066	0.74256	0.78912	0.72018	0.77912	0.72638	0.78634	0.74365	0.78045	0.77155	0.70257	0.7804	0.71971	0.74542	0.76726	0.75956	0.78372	0.78158	0.71636	0.81983	0.78207	0.7801	0.80656	0.79166	0.80213	0.7063	0.78539	0.75991	0.78628	0.70966	0.81357	0.77511	0.7575
GDSC_2313287	0.69338	0.76224	0.87385	0.7775	0.71866	0.75501	0.77012	0.76535	0.7553	0.72349	0.74135	0.73092	0.73394	0.73053	0.72501	0.7445	0.75424	0.72321	0.74891	0.7303	0.75484	0.73372	0.76741	0.71561	0.74507	0.79006	0.69242	0.72875	0.72538	0.73849	0.79506	0.78518	0.72723	0.72991	0.74607	0.77357	0.73007	0.75537	0.74786	0.76347	0.75753	0.70533	0.77546	0.77807	0.73775	0.70295	0.77384	0.78034	0.72794
GDSC_22rv1	0.70655	0.74001	0.77523	0.86179	0.7255	0.76632	0.76111	0.75402	0.74866	0.72701	0.74421	0.7442	0.73411	0.74025	0.73856	0.75038	0.73683	0.74743	0.75518	0.73684	0.73626	0.73549	0.75048	0.73865	0.74245	0.74883	0.69973	0.73672	0.72667	0.74952	0.73004	0.75581	0.7174	0.73967	0.75473	0.74722	0.72599	0.74434	0.71102	0.70925	0.72497	0.713	0.75305	0.78094	0.74262	0.70166	0.72741	0.75409	0.7398
GDSC_42mgba	0.71384	0.76226	0.72364	0.72345	0.8556	0.78194	0.75882	0.75834	0.78251	0.79646	0.78232	0.79471	0.77292	0.7939	0.76184	0.77823	0.75445	0.74602	0.7815	0.71248	0.7748	0.71563	0.75744	0.75566	0.76122	0.73078	0.70003	0.77875	0.71103	0.7557	0.72108	0.72267	0.78572	0.81521	0.69561	0.7496	0.80453	0.76451	0.7424	0.72914	0.74984	0.68894	0.74956	0.73049	0.79035	0.72037	0.73563	0.73285	0.76749
GDSC_639v	0.74666	0.79391	0.76915	0.78072	0.79276	0.87168	0.81001	0.79101	0.80151	0.79793	0.81105	0.80121	0.78507	0.79799	0.78962	0.80001	0.78327	0.79343	0.80312	0.76225	0.78375	0.76136	0.79502	0.77595	0.79297	0.77294	0.73454	0.79443	0.75871	0.79087	0.75382	0.75756	0.78869	0.79812	0.7329	0.7948	0.79809	0.79106	0.76578	0.75904	0.76999	0.74048	0.78006	0.76901	0.80347	0.74602	0.77004	0.77799	0.77694
GDSC_647v	0.73498	0.82829	0.79214	0.78364	0.77815	0.8191	0.88552	0.7995	0.81048	0.78911	0.81419	0.79281	0.78011	0.79253	0.7657	0.7917	0.8008	0.76518	0.79379	0.75026	0.7856	0.754	0.80469	0.75747	0.79791	0.80096	0.72728	0.78738	0.7436	0.76796	0.77562	0.7912	0.77458	0.78406	0.74541	0.81973	0.78706	0.79044	0.80073	0.79093	0.80379	0.73342	0.82024	0.78705	0.79014	0.72892	0.81008	0.80166	0.77098
GDSC_769p	0.73641	0.78824	0.78295	0.77417	0.76667	0.79828	0.79348	0.87774	0.83035	0.78341	0.79531	0.77566	0.77962	0.79088	0.76335	0.79282	0.77216	0.76448	0.79425	0.74618	0.81878	0.74367	0.80987	0.75319	0.82821	0.78168	0.72022	0.78178	0.74263	0.76885	0.77137	0.76512	0.75892	0.78126	0.74365	0.78143	0.7875	0.78669	0.75045	0.7501	0.76166	0.73052	0.78197	0.77235	0.78777	0.73032	0.76566	0.78604	0.77424
GDSC_786o	0.71074	0.79115	0.74986	0.74127	0.78316	0.79218	0.78372	0.8115	0.84274	0.80182	0.78901	0.78303	0.77194	0.79166	0.75536	0.78207	0.76287	0.74025	0.78223	0.72312	0.81714	0.7256	0.78793	0.7438	0.80092	0.74817	0.70065	0.77847	0.72245	0.75445	0.74992	0.74411	0.78619	0.79034	0.71373	0.77294	0.8071	0.79005	0.75647	0.75166	0.76115	0.70246	0.76845	0.74334	0.79041	0.71766	0.7633	0.75401	0.76384
GDSC_8305c	0.72019	0.80769	0.7371	0.73976	0.80723	0.80164	0.79005	0.79323	0.80949	0.87265	0.83348	0.7985	0.78887	0.80191	0.76466	0.79339	0.77018	0.75335	0.79721	0.72354	0.78837	0.72701	0.78438	0.75877	0.78813	0.74815	0.70183	0.81382	0.71886	0.74774	0.7385	0.73314	0.81724	0.8113	0.70699	0.77567	0.80969	0.78411	0.76635	0.74678	0.77127	0.70081	0.76056	0.74164	0.80179	0.70988	0.76794	0.75089	0.77458
GDSC_8505c	0.73185	0.81162	0.7562	0.7557	0.80238	0.81633	0.80922	0.79771	0.81098	0.82364	0.87694	0.78928	0.79146	0.80841	0.76618	0.79913	0.78494	0.76225	0.80283	0.7382	0.78535	0.74119	0.79885	0.76111	0.79418	0.76901	0.71656	0.81424	0.73657	0.76101	0.7485	0.75173	0.79267	0.80612	0.71207	0.78368	0.80214	0.78356	0.77251	0.75215	0.77741	0.72088	0.77849	0.75664	0.80881	0.72338	0.77983	0.77003	0.77984
GDSC_8mgba	0.72889	0.78509	0.74393	0.75811	0.79927	0.80654	0.79203	0.78262	0.80058	0.79355	0.78972	0.86749	0.79105	0.79703	0.7707	0.79771	0.76538	0.7705	0.80506	0.74816	0.78584	0.74952	0.77478	0.76278	0.78413	0.75304	0.71667	0.78734	0.73615	0.77041	0.73523	0.74967	0.79192	0.79875	0.72161	0.77171	0.79705	0.78789	0.75339	0.74358	0.76016	0.71744	0.77098	0.74933	0.79498	0.72633	0.76091	0.7554	0.77105
GDSC_a101d	0.70308	0.76757	0.72998	0.73745	0.77454	0.77441	0.76777	0.77003	0.77994	0.7818	0.77749	0.79169	0.87288	0.7806	0.75599	0.82773	0.75097	0.74496	0.82529	0.72441	0.77639	0.72723	0.76847	0.74305	0.77238	0.73287	0.68308	0.77491	0.72113	0.74754	0.72046	0.73521	0.77293	0.78346	0.70991	0.75235	0.77529	0.76544	0.73258	0.72292	0.74593	0.69712	0.74812	0.72729	0.77457	0.69731	0.74227	0.74116	0.82042
GDSC_a172	0.71268	0.76934	0.72826	0.7372	0.78688	0.78962	0.77438	0.77803	0.78882	0.78419	0.78858	0.78208	0.77819	0.8672	0.76416	0.78499	0.75504	0.75523	0.78875	0.71675	0.78866	0.72077	0.77544	0.75135	0.78071	0.73913	0.69794	0.77887	0.71699	0.76245	0.72839	0.7312	0.77508	0.8034	0.70907	0.74583	0.78374	0.75971	0.7329	0.72661	0.75106	0.69461	0.75602	0.73696	0.79039	0.70529	0.73591	0.7393	0.77008
GDSC_a204	0.71142	0.73646	0.72562	0.74463	0.76067	0.78079	0.74912	0.74996	0.75329	0.74938	0.75335	0.75688	0.75127	0.76172	0.8748	0.76599	0.73716	0.7837	0.77468	0.72136	0.75361	0.72541	0.75857	0.75071	0.75038	0.72762	0.70198	0.7495	0.72125	0.77664	0.71123	0.71642	0.74529	0.76768	0.69576	0.73911	0.75756	0.74435	0.71483	0.71168	0.723	0.69796	0.73944	0.73257	0.76884	0.70897	0.71829	0.72794	0.75075
GDSC_a2058	0.7347	0.77386	0.75216	0.7637	0.77512	0.79421	0.77973	0.78285	0.78671	0.78163	0.78458	0.79025	0.82503	0.78445	0.77266	0.86884	0.76185	0.77247	0.82461	0.74581	0.77889	0.74439	0.78073	0.76441	0.7787	0.75073	0.71587	0.77666	0.74346	0.77274	0.73329	0.7466	0.76451	0.78215	0.72816	0.7654	0.78063	0.76937	0.7395	0.73016	0.74774	0.72407	0.75811	0.75103	0.78257	0.72642	0.74796	0.75893	0.8278
GDSC_a253	0.66824	0.76446	0.73936	0.71941	0.72797	0.74313	0.75486	0.73532	0.73667	0.72874	0.73942	0.72893	0.72592	0.73568	0.71492	0.73242	0.83878	0.70368	0.73438	0.6887	0.74408	0.69361	0.73875	0.70641	0.73259	0.7378	0.65508	0.71769	0.68558	0.70998	0.73603	0.73565	0.72529	0.74144	0.69613	0.78906	0.73776	0.73105	0.7753	0.78469	0.78833	0.66472	0.75515	0.73871	0.73746	0.66721	0.77061	0.73312	0.72233
GDSC_a2780	0.73083	0.73674	0.73111	0.75836	0.74859	0.78917	0.75062	0.75167	0.75148	0.7413	0.75116	0.75622	0.74526	0.75633	0.78448	0.76412	0.73289	0.86516	0.77154	0.74097	0.74427	0.73872	0.76078	0.75757	0.75175	0.73675	0.71604	0.75004	0.73772	0.78452	0.70745	0.72438	0.73157	0.7529	0.70396	0.74292	0.74835	0.73797	0.70729	0.70249	0.71914	0.72222	0.74207	0.74062	0.76335	0.72386	0.71461	0.74425	0.74341
GDSC_a375	0.72205	0.76818	0.73917	0.75256	0.77516	0.78731	0.76875	0.77111	0.77476	0.78093	0.77792	0.78682	0.81991	0.78106	0.77371	0.82403	0.75128	0.76413	0.86409	0.73727	0.77058	0.73895	0.7691	0.7584	0.76694	0.73701	0.70509	0.77636	0.73164	0.76626	0.73041	0.73429	0.78406	0.78695	0.71211	0.7639	0.77443	0.77239	0.73951	0.72646	0.74493	0.70921	0.7527	0.73955	0.77934	0.7191	0.74005	0.74022	0.80636
GDSC_a3kaw	0.72657	0.73378	0.75173	0.75219	0.71883	0.76189	0.74582	0.74035	0.7436	0.71454	0.72985	0.73345	0.73359	0.7184	0.7238	0.73653	0.72543	0.73384	0.75028	0.83398	0.72562	0.79014	0.73774	0.71929	0.72263	0.74737	0.72983	0.73024	0.77429	0.73934	0.71455	0.74899	0.70223	0.71976	0.71162	0.73859	0.71726	0.72641	0.70016	0.70445	0.71201	0.74492	0.74745	0.74166	0.73028	0.73022	0.73016	0.74651	0.71592
GDSC_a498	0.6984	0.77587	0.7449	0.73882	0.77617	0.77534	0.77466	0.80631	0.8207	0.78796	0.78309	0.77681	0.77967	0.80019	0.75683	0.77881	0.7672	0.74071	0.77801	0.71438	0.85652	0.71854	0.79372	0.73716	0.79804	0.74714	0.68148	0.76922	0.71025	0.74697	0.74768	0.74215	0.77058	0.79584	0.71716	0.76284	0.80065	0.77787	0.75029	0.75046	0.76436	0.6867	0.76822	0.73896	0.78392	0.69557	0.75263	0.75089	0.7704
GDSC_a4fuk	0.72604	0.71618	0.72609	0.7279	0.71146	0.75081	0.73186	0.72496	0.73025	0.70857	0.72156	0.73563	0.72639	0.71712	0.72246	0.73061	0.7065	0.73148	0.74199	0.78361	0.71787	0.84634	0.72009	0.7158	0.71567	0.72243	0.73749	0.72463	0.79465	0.73176	0.70111	0.7259	0.7156	0.71395	0.69042	0.72004	0.72014	0.72787	0.69455	0.6994	0.69763	0.754	0.72601	0.72073	0.72196	0.7457	0.70878	0.71462	0.7128
GDSC_a549	0.69916	0.76809	0.78122	0.75978	0.74823	0.776	0.77237	0.79297	0.78375	0.76615	0.77439	0.76048	0.76294	0.77493	0.75516	0.77381	0.76009	0.74853	0.77302	0.7185	0.79717	0.71864	0.85144	0.74124	0.7896	0.76056	0.68431	0.75749	0.71382	0.74538	0.7761	0.75438	0.76121	0.76897	0.7479	0.77244	0.76785	0.78365	0.74646	0.74253	0.76225	0.69209	0.76465	0.75427	0.77015	0.69644	0.76101	0.77544	0.7523
GDSC_a673	0.7374	0.74778	0.7322	0.7579	0.76617	0.78393	0.75653	0.75412	0.75891	0.76054	0.76698	0.76128	0.75541	0.76394	0.76147	0.77346	0.74472	0.7762	0.77655	0.73454	0.74523	0.73536	0.7575	0.88155	0.75193	0.73174	0.72068	0.75825	0.73118	0.76424	0.70493	0.72348	0.74512	0.77308	0.7155	0.74992	0.75735	0.74131	0.71315	0.70187	0.72949	0.71877	0.74006	0.74616	0.7711	0.7251	0.72326	0.73971	0.75373
GDSC_achn	0.69356	0.76264	0.73763	0.73723	0.75268	0.77026	0.77071	0.80368	0.79697	0.76804	0.76929	0.77244	0.76181	0.77429	0.74131	0.76843	0.74966	0.7406	0.76414	0.70302	0.79965	0.70916	0.78177	0.73132	0.85792	0.73487	0.67344	0.75869	0.70276	0.72838	0.74463	0.72578	0.76742	0.76416	0.71342	0.75752	0.77999	0.7731	0.73691	0.73541	0.75589	0.68254	0.74681	0.73227	0.76195	0.69185	0.74049	0.74941	0.75195
GDSC_ags	0.71846	0.77387	0.80059	0.75992	0.7402	0.77946	0.78936	0.77302	0.76832	0.74247	0.76152	0.74666	0.74499	0.74809	0.74081	0.75535	0.76261	0.7441	0.76086	0.73748	0.75743	0.74078	0.76958	0.72868	0.75701	0.87227	0.7111	0.74737	0.73267	0.75188	0.77473	0.77773	0.72891	0.74386	0.72773	0.78205	0.74288	0.7518	0.75288	0.76254	0.75723	0.71791	0.78605	0.77111	0.75018	0.71905	0.78215	0.80593	0.73672
GDSC_allsil	0.77349	0.70745	0.69931	0.71356	0.71184	0.74498	0.7197	0.71606	0.72061	0.69847	0.7156	0.70794	0.69652	0.70585	0.71197	0.71805	0.69053	0.72365	0.72462	0.74085	0.69095	0.75489	0.70389	0.71947	0.69631	0.71121	0.86675	0.71451	0.76596	0.73062	0.67364	0.69882	0.68308	0.70876	0.65907	0.70205	0.70379	0.69323	0.67248	0.6665	0.6708	0.77509	0.71274	0.71374	0.71452	0.7781	0.68897	0.69625	0.6968
GDSC_am38	0.72303	0.78311	0.7321	0.73637	0.78755	0.79434	0.77397	0.77676	0.79259	0.79915	0.80415	0.77211	0.77875	0.79464	0.75497	0.78494	0.74887	0.75042	0.79472	0.72642	0.77032	0.72973	0.77382	0.74551	0.77638	0.74209	0.70816	0.85895	0.72672	0.75142	0.72287	0.72696	0.77286	0.79024	0.69352	0.75325	0.78718	0.75928	0.74199	0.72307	0.74232	0.70928	0.74869	0.7276	0.78868	0.72094	0.7471	0.74068	0.76253
GDSC_amo1	0.74798	0.70883	0.72818	0.73158	0.71693	0.75162	0.72922	0.72752	0.72991	0.7072	0.72342	0.72764	0.72708	0.71976	0.72527	0.73163	0.70972	0.73386	0.74001	0.78309	0.71398	0.80432	0.72087	0.7169	0.71603	0.72428	0.75667	0.72482	0.8602	0.73599	0.69662	0.7158	0.70717	0.71617	0.69662	0.71838	0.72151	0.72307	0.6918	0.69446	0.6963	0.78324	0.72321	0.72448	0.72002	0.76344	0.69893	0.71863	0.72109
GDSC_an3ca	0.75028	0.761	0.75412	0.77692	0.7785	0.8121	0.77488	0.7754	0.77788	0.7605	0.7749	0.76705	0.76919	0.78059	0.79523	0.78649	0.75528	0.80292	0.79311	0.75485	0.7625	0.75245	0.77545	0.7714	0.76141	0.76264	0.739	0.76944	0.7537	0.87804	0.72567	0.75393	0.74021	0.78176	0.71776	0.75793	0.7675	0.74833	0.72588	0.71764	0.73143	0.74355	0.77234	0.7675	0.78783	0.74029	0.73627	0.76282	0.7694
GDSC_aspc1	0.66431	0.75645	0.77365	0.71559	0.71411	0.73583	0.75119	0.75282	0.74524	0.72929	0.7395	0.72286	0.7216	0.72705	0.70721	0.72742	0.74196	0.69496	0.7346	0.68424	0.75223	0.69378	0.75526	0.69205	0.74258	0.75152	0.65865	0.71755	0.68704	0.70329	0.86304	0.73417	0.73311	0.72637	0.70617	0.76072	0.72955	0.75907	0.73916	0.75578	0.75067	0.663	0.74406	0.72189	0.72874	0.67599	0.76806	0.75406	0.71024
GDSC_au565	0.68675	0.74174	0.78166	0.75848	0.71103	0.74352	0.76076	0.74053	0.73533	0.71321	0.72785	0.72486	0.72662	0.72021	0.7125	0.73246	0.73809	0.71371	0.73876	0.71987	0.73934	0.72369	0.7433	0.70475	0.72746	0.75691	0.67975	0.71097	0.70923	0.72626	0.7415	0.86555	0.71332	0.71793	0.72315	0.75786	0.71888	0.73548	0.73255	0.74292	0.74611	0.69227	0.78727	0.79038	0.72644	0.69355	0.75222	0.75666	0.71721
GDSC_bcpap	0.70368	0.80414	0.73272	0.7276	0.78589	0.78887	0.78452	0.77965	0.79539	0.82871	0.80538	0.79603	0.78299	0.78842	0.75218	0.7826	0.75974	0.73901	0.79456	0.7161	0.78025	0.72259	0.77755	0.74439	0.7767	0.73937	0.69022	0.78629	0.71345	0.74119	0.74181	0.73664	0.85173	0.78951	0.69998	0.77603	0.79601	0.78981	0.76531	0.75127	0.76799	0.68812	0.7592	0.73191	0.7899	0.70309	0.77037	0.7443	0.75321
GDSC_becker	0.689	0.75089	0.71385	0.72023	0.79076	0.76132	0.74635	0.75617	0.77027	0.78039	0.76693	0.78818	0.76735	0.79138	0.75047	0.76796	0.73972	0.73523	0.7734	0.69614	0.77377	0.70506	0.75416	0.74126	0.75387	0.71158	0.67406	0.76	0.69149	0.7379	0.71765	0.70993	0.78316	0.84831	0.69484	0.74073	0.77156	0.76554	0.72465	0.7216	0.74239	0.6687	0.73332	0.7213	0.776	0.67993	0.72491	0.71371	0.76327
GDSC_ben	0.67173	0.72317	0.74935	0.759	0.69671	0.73396	0.73386	0.73717	0.7304	0.70381	0.71189	0.71677	0.71614	0.71728	0.70348	0.72506	0.71271	0.70827	0.72771	0.70943	0.72924	0.70557	0.73881	0.71121	0.72341	0.72818	0.66501	0.70454	0.70307	0.70861	0.72542	0.73025	0.70027	0.71091	0.85773	0.72674	0.70406	0.72671	0.69326	0.69487	0.70882	0.67975	0.72979	0.74102	0.71249	0.67014	0.71655	0.74341	0.7094
GDSC_bftc905	0.72238	0.82458	0.78639	0.76887	0.76401	0.80215	0.81571	0.78709	0.79187	0.78008	0.79246	0.77384	0.77099	0.7682	0.75852	0.78263	0.82472	0.75778	0.79146	0.74324	0.77636	0.74296	0.79472	0.75126	0.78151	0.78535	0.70883	0.77129	0.73728	0.75629	0.77782	0.77672	0.76844	0.77258	0.73145	0.88231	0.78417	0.78955	0.81224	0.80711	0.81293	0.72148	0.79575	0.77788	0.7803	0.72284	0.8271	0.78973	0.75665
GDSC_bftc909	0.71363	0.78103	0.73243	0.72973	0.79478	0.78425	0.77312	0.78625	0.80795	0.80881	0.79609	0.79905	0.78506	0.79625	0.75829	0.78826	0.77167	0.74436	0.78371	0.71486	0.798	0.7239	0.78095	0.74798	0.79157	0.73379	0.69402	0.78725	0.71772	0.7421	0.73483	0.73036	0.78739	0.79389	0.69611	0.76921	0.86048	0.78371	0.75711	0.74727	0.77384	0.69901	0.75376	0.72994	0.79848	0.71588	0.75681	0.74585	0.76865
GDSC_bht101	0.71388	0.79343	0.76736	0.75542	0.76864	0.78967	0.79351	0.79711	0.80702	0.78759	0.79063	0.79741	0.77624	0.77657	0.75233	0.78116	0.77066	0.74939	0.7871	0.7343	0.79041	0.74455	0.79466	0.7391	0.78792	0.76383	0.70352	0.77449	0.7327	0.74441	0.77578	0.75957	0.78605	0.7769	0.72884	0.79483	0.79093	0.86868	0.7712	0.76761	0.77429	0.70724	0.76709	0.74884	0.78186	0.71953	0.78958	0.77132	0.75963
GDSC_bhy	0.68854	0.80619	0.76326	0.72751	0.74921	0.76668	0.80067	0.76189	0.773	0.76865	0.78088	0.75801	0.74807	0.75084	0.72588	0.75394	0.80466	0.71701	0.76017	0.70452	0.76164	0.71238	0.76375	0.71374	0.75547	0.75919	0.6809	0.75542	0.69984	0.71838	0.75854	0.75535	0.76573	0.75549	0.70049	0.82166	0.76961	0.77263	0.86174	0.81626	0.8096	0.68074	0.77811	0.74218	0.75628	0.69515	0.8142	0.75142	0.7391
GDSC_bicr22	0.69104	0.79716	0.76394	0.72486	0.73801	0.7697	0.79154	0.76315	0.77383	0.75338	0.76619	0.74304	0.74376	0.74554	0.72673	0.74687	0.80236	0.71636	0.75326	0.70965	0.76049	0.71597	0.75924	0.71097	0.75675	0.76296	0.68047	0.74352	0.70994	0.72288	0.75834	0.75649	0.74678	0.74567	0.69707	0.81424	0.76872	0.75845	0.80934	0.84301	0.80217	0.6889	0.77528	0.74125	0.75513	0.70599	0.80588	0.75086	0.72919
GDSC_bicr31	0.70169	0.83074	0.77668	0.7461	0.77326	0.78889	0.82185	0.78552	0.79832	0.79029	0.80221	0.77891	0.77215	0.78066	0.74748	0.77576	0.82277	0.7386	0.78106	0.72361	0.78015	0.72701	0.79111	0.73659	0.78764	0.77808	0.68741	0.77724	0.7173	0.7359	0.77559	0.77272	0.77449	0.77735	0.71654	0.8294	0.79075	0.78185	0.8182	0.82044	0.85744	0.69658	0.7976	0.76266	0.78655	0.7006	0.82771	0.78177	0.75503
GDSC_bl41	0.77403	0.71414	0.72462	0.73002	0.7135	0.74808	0.7325	0.72612	0.73202	0.70747	0.7241	0.72192	0.71614	0.71162	0.71086	0.72655	0.7085	0.72859	0.72955	0.75864	0.7042	0.77557	0.71909	0.71671	0.71406	0.7229	0.77248	0.72183	0.79477	0.72964	0.69063	0.71372	0.69381	0.71162	0.68774	0.72241	0.71989	0.71298	0.68899	0.6914	0.69461	0.85546	0.72354	0.72732	0.71752	0.77913	0.70084	0.71695	0.71789
GDSC_bt20	0.71276	0.7762	0.78213	0.76236	0.74773	0.77563	0.80277	0.76778	0.76909	0.74814	0.76265	0.75476	0.75064	0.75683	0.74487	0.75569	0.77249	0.7365	0.76676	0.7342	0.77122	0.73585	0.76646	0.72809	0.75843	0.78149	0.70645	0.74231	0.72726	0.75338	0.76314	0.81309	0.74447	0.75784	0.72691	0.79122	0.75774	0.75467	0.77079	0.77643	0.77909	0.70872	0.87402	0.79274	0.75863	0.71649	0.78343	0.77123	0.74612
GDSC_bt474	0.70806	0.76145	0.77317	0.7742	0.725	0.76206	0.7675	0.75362	0.74874	0.72643	0.73797	0.72177	0.72551	0.73614	0.72963	0.7427	0.74708	0.72941	0.74946	0.72335	0.74203	0.72221	0.74748	0.72882	0.73449	0.7643	0.7012	0.71936	0.71731	0.7502	0.73857	0.79955	0.71271	0.73571	0.73233	0.76623	0.72408	0.7242	0.7267	0.73655	0.7428	0.70652	0.79106	0.86922	0.74978	0.70513	0.75514	0.76557	0.72502
GDSC_bt549	0.73239	0.78681	0.74396	0.75645	0.80776	0.8115	0.7825	0.78987	0.80118	0.80328	0.80757	0.79899	0.78757	0.80248	0.78376	0.80027	0.77233	0.77572	0.80094	0.73712	0.7888	0.73733	0.7867	0.77185	0.78217	0.74875	0.71409	0.78978	0.73114	0.77515	0.73355	0.74039	0.77737	0.81309	0.70632	0.77	0.80626	0.78303	0.74954	0.73704	0.75886	0.7164	0.76664	0.75178	0.86563	0.72369	0.75292	0.75247	0.7752
GDSC_bv173	0.81281	0.72425	0.72587	0.73106	0.73211	0.76375	0.73518	0.73959	0.74278	0.72126	0.73568	0.73063	0.72587	0.72452	0.73053	0.7438	0.71539	0.7425	0.74801	0.75525	0.71907	0.77023	0.72207	0.73371	0.72403	0.73004	0.79246	0.7368	0.7829	0.74348	0.70017	0.7206	0.70791	0.72555	0.67897	0.7259	0.73578	0.72162	0.69765	0.69411	0.69514	0.79459	0.73126	0.72754	0.73429	0.86412	0.71009	0.72159	0.72331
GDSC_bxpc3	0.68918	0.80095	0.77051	0.73505	0.73797	0.76367	0.78892	0.75814	0.7647	0.75437	0.77084	0.74335	0.74285	0.73835	0.72335	0.74794	0.7907	0.71824	0.75544	0.70973	0.75273	0.71923	0.76427	0.71583	0.74998	0.76891	0.68169	0.74532	0.70487	0.72103	0.77248	0.76197	0.74352	0.7448	0.70224	0.81286	0.74519	0.76159	0.79452	0.79363	0.79225	0.68549	0.77692	0.74666	0.74902	0.69083	0.86585	0.76458	0.72722
GDSC_c2bbe1	0.69852	0.76424	0.78653	0.76021	0.73158	0.76705	0.77967	0.76336	0.76058	0.73529	0.75184	0.74285	0.73899	0.74047	0.73066	0.74693	0.75766	0.73776	0.74811	0.71748	0.75512	0.72157	0.7718	0.72557	0.76083	0.79696	0.68452	0.73409	0.71862	0.74016	0.77422	0.76947	0.72495	0.73456	0.74144	0.77591	0.74364	0.75498	0.74343	0.74139	0.75816	0.69701	0.77405	0.76833	0.74018	0.69901	0.76527	0.87417	0.73032
GDSC_c32	0.71228	0.75624	0.73201	0.73972	0.76512	0.7711	0.7586	0.76549	0.77579	0.76824	0.7622	0.76629	0.81427	0.77474	0.75579	0.82129	0.74232	0.74543	0.80851	0.72008	0.77362	0.72184	0.75598	0.74409	0.75994	0.72908	0.69583	0.76018	0.72286	0.76004	0.72094	0.73324	0.75399	0.77737	0.7103	0.74424	0.76985	0.75269	0.72561	0.72244	0.73409	0.70112	0.74651	0.73561	0.76682	0.7134	0.73268	0.73481	0.8623
GDSC_ca46	0.77183	0.69972	0.71833	0.72752	0.70362	0.7418	0.71851	0.71442	0.71869	0.69612	0.70882	0.71317	0.70542	0.70272	0.71022	0.71715	0.6959	0.7256	0.72355	0.75337	0.69761	0.77016	0.70329	0.71327	0.70356	0.71261	0.77057	0.71084	0.7934	0.72882	0.6864	0.70783	0.69074	0.70176	0.68362	0.71	0.71074	0.70347	0.6806	0.67896	0.68023	0.83385	0.71364	0.72049	0.70743	0.78785	0.68677	0.70403	0.70349
GDSC_cadoes1	0.71887	0.71547	0.70811	0.74262	0.72936	0.7557	0.72069	0.72574	0.72657	0.72412	0.73101	0.72757	0.72453	0.7346	0.73894	0.73745	0.71171	0.74742	0.74706	0.72194	0.71884	0.71365	0.72798	0.77997	0.71773	0.70806	0.70648	0.72616	0.71706	0.74175	0.68219	0.70359	0.71233	0.73776	0.70359	0.71321	0.72272	0.70505	0.67986	0.67354	0.69005	0.70552	0.71435	0.7286	0.73798	0.71157	0.6841	0.71395	0.72353
GDSC_caki1	0.70507	0.79151	0.75441	0.75086	0.7762	0.78819	0.79783	0.81757	0.82207	0.79544	0.79725	0.79425	0.78683	0.80059	0.76045	0.78882	0.7679	0.75446	0.78773	0.72161	0.82933	0.72365	0.8074	0.74384	0.82584	0.75769	0.6876	0.77934	0.71451	0.74855	0.76275	0.74881	0.78718	0.79136	0.72808	0.77895	0.80024	0.7959	0.75833	0.75446	0.77909	0.69396	0.7743	0.75197	0.79543	0.70078	0.76767	0.76887	0.773
GDSC_cal120	0.72682	0.80204	0.76418	0.77306	0.79027	0.8154	0.81369	0.79135	0.80173	0.80044	0.8236	0.78915	0.7802	0.80391	0.7774	0.78847	0.7833	0.77126	0.79671	0.74269	0.78541	0.74135	0.79646	0.76233	0.7948	0.77009	0.71203	0.79753	0.73352	0.77001	0.75608	0.75923	0.78531	0.79818	0.72546	0.79314	0.79698	0.78294	0.76995	0.7544	0.78202	0.71533	0.78886	0.76939	0.81398	0.72094	0.77731	0.77462	0.76756
GDSC_cal12t	0.7038	0.79332	0.77674	0.74707	0.74622	0.77399	0.81052	0.76508	0.7702	0.75619	0.77567	0.75209	0.74028	0.75456	0.7443	0.75448	0.77805	0.73322	0.75731	0.71787	0.76159	0.72453	0.77562	0.7277	0.76275	0.7762	0.69796	0.74546	0.71528	0.73873	0.76055	0.77534	0.75583	0.74791	0.71067	0.79959	0.76578	0.76216	0.7871	0.78294	0.7833	0.69869	0.79938	0.7628	0.76024	0.71294	0.79075	0.77592	0.72935
GDSC_cal148	0.71818	0.74805	0.76634	0.7842	0.71924	0.76314	0.76176	0.75051	0.74473	0.71885	0.73492	0.72544	0.72477	0.73456	0.73091	0.74269	0.7382	0.74206	0.74896	0.73302	0.7386	0.73011	0.74333	0.73748	0.73642	0.75541	0.71024	0.72124	0.72851	0.75889	0.72712	0.77983	0.71178	0.7312	0.73431	0.75235	0.72303	0.72437	0.70961	0.71953	0.72777	0.7184	0.773	0.80977	0.74809	0.70964	0.7327	0.75436	0.72404
GDSC_cal27	0.67449	0.78339	0.7603	0.72201	0.73099	0.74667	0.77968	0.74872	0.75333	0.73959	0.75127	0.74905	0.73734	0.73499	0.71765	0.73543	0.80791	0.70744	0.74255	0.7021	0.75154	0.71184	0.74746	0.70433	0.7464	0.75302	0.66754	0.72871	0.69679	0.70795	0.75971	0.74945	0.7468	0.74366	0.69813	0.80719	0.74643	0.7571	0.80811	0.82653	0.81344	0.67697	0.76806	0.74269	0.73605	0.68204	0.79716	0.74196	0.72836
GDSC_cal29	0.69403	0.79505	0.76827	0.74941	0.7507	0.76528	0.80487	0.76308	0.76592	0.7562	0.77109	0.76184	0.74763	0.75213	0.73559	0.7514	0.79856	0.72932	0.75474	0.71113	0.76133	0.71877	0.76872	0.72825	0.76328	0.77613	0.68442	0.74454	0.70079	0.73049	0.76385	0.77349	0.75626	0.76095	0.71741	0.81543	0.75702	0.76487	0.79267	0.79489	0.81074	0.68513	0.79291	0.77452	0.75441	0.68745	0.8072	0.77045	0.74075
GDSC_cal33	0.67316	0.78883	0.76282	0.71742	0.72486	0.74937	0.78082	0.75234	0.76056	0.73793	0.74693	0.73214	0.7354	0.73947	0.7166	0.73911	0.7918	0.70452	0.74471	0.69105	0.76186	0.70147	0.75478	0.70256	0.74434	0.75356	0.66497	0.7257	0.69054	0.71632	0.75982	0.76356	0.74467	0.74003	0.69292	0.80686	0.74609	0.74769	0.80364	0.82203	0.80332	0.66847	0.7777	0.74035	0.74358	0.68272	0.80751	0.74673	0.72135
GDSC_cal51	0.72553	0.77474	0.77633	0.77977	0.75901	0.79322	0.78622	0.78917	0.78479	0.76543	0.77917	0.76994	0.76024	0.7703	0.7641	0.77362	0.76601	0.77626	0.77526	0.73214	0.77533	0.73418	0.78988	0.76041	0.78597	0.77206	0.70979	0.75674	0.72954	0.77638	0.76217	0.75931	0.75334	0.76693	0.73331	0.78151	0.7702	0.76833	0.73986	0.74116	0.76238	0.71287	0.77292	0.77198	0.77653	0.71585	0.76104	0.79435	0.75365
GDSC_cal54	0.70301	0.79162	0.75456	0.74684	0.76402	0.78599	0.79118	0.82432	0.82022	0.78391	0.78447	0.77842	0.77174	0.78648	0.75353	0.77658	0.76766	0.74266	0.77645	0.71254	0.81327	0.71563	0.79658	0.73811	0.83643	0.7581	0.68645	0.76821	0.7105	0.74355	0.76619	0.74241	0.77651	0.77728	0.72445	0.77928	0.78642	0.78936	0.75696	0.75506	0.77427	0.69066	0.76862	0.74893	0.77796	0.69903	0.76419	0.77022	0.75766
GDSC_cal62	0.74337	0.80698	0.76953	0.78043	0.78716	0.8297	0.81545	0.80294	0.80985	0.8146	0.82269	0.79322	0.78417	0.79795	0.78309	0.79928	0.78516	0.78198	0.80466	0.754	0.78722	0.75328	0.80101	0.77439	0.80381	0.77614	0.73053	0.79745	0.74822	0.77946	0.762	0.76231	0.79503	0.79489	0.73333	0.80081	0.80553	0.79388	0.77434	0.76539	0.78017	0.73433	0.78865	0.77116	0.80263	0.74231	0.78011	0.78034	0.77376
GDSC_cal78	0.72381	0.79027	0.73909	0.75571	0.82721	0.80893	0.79067	0.78781	0.80979	0.81698	0.81319	0.80962	0.7953	0.81502	0.77649	0.80392	0.77074	0.76733	0.80669	0.73455	0.79101	0.73611	0.79003	0.76606	0.78253	0.74799	0.70678	0.80221	0.72741	0.76864	0.72694	0.73746	0.78774	0.82672	0.70964	0.76354	0.80443	0.77782	0.74789	0.73354	0.76388	0.7123	0.76479	0.74591	0.81499	0.71323	0.75379	0.75289	0.7889
GDSC_cal851	0.6944	0.81189	0.7704	0.75205	0.7547	0.77497	0.81745	0.77569	0.78272	0.77708	0.781	0.78168	0.76438	0.76411	0.74248	0.76905	0.78488	0.72927	0.7701	0.71585	0.77673	0.72112	0.7805	0.73048	0.77644	0.7698	0.6843	0.75286	0.70589	0.73381	0.77123	0.77461	0.77387	0.76698	0.71901	0.81141	0.7745	0.7881	0.7952	0.79795	0.80425	0.68601	0.8015	0.76468	0.77696	0.69279	0.80166	0.76967	0.74694
GDSC_calu3	0.6821	0.79441	0.77643	0.7384	0.72823	0.76031	0.79552	0.77186	0.77053	0.74983	0.76089	0.74372	0.74553	0.74217	0.72133	0.7493	0.76968	0.71589	0.75477	0.70098	0.76362	0.70816	0.76956	0.71203	0.76727	0.77139	0.67073	0.73769	0.69689	0.72025	0.77791	0.76156	0.74585	0.73908	0.71868	0.79912	0.74909	0.76178	0.77834	0.78337	0.7844	0.67974	0.77697	0.75368	0.74944	0.68659	0.79954	0.77245	0.72826
GDSC_calu6	0.71884	0.77618	0.75276	0.75668	0.76906	0.78876	0.7696	0.77778	0.77674	0.77461	0.77777	0.76996	0.7675	0.7786	0.75906	0.78362	0.76494	0.75618	0.79074	0.72738	0.76505	0.72796	0.77595	0.75899	0.76907	0.75396	0.70237	0.76493	0.72632	0.75926	0.75306	0.7453	0.7584	0.78019	0.728	0.7714	0.76779	0.77344	0.73741	0.72665	0.749	0.70637	0.76605	0.75165	0.77756	0.71195	0.76029	0.76547	0.75886
GDSC_cama1	0.70672	0.75313	0.77999	0.77856	0.72748	0.76125	0.77039	0.75758	0.75252	0.72792	0.73949	0.73749	0.72991	0.73924	0.73789	0.74295	0.74565	0.73665	0.74873	0.73062	0.75041	0.7308	0.75223	0.72669	0.738	0.76593	0.70642	0.72157	0.72299	0.75118	0.7463	0.79724	0.72284	0.73795	0.73108	0.76384	0.72996	0.73802	0.73187	0.74721	0.74902	0.70924	0.78847	0.82125	0.74859	0.70917	0.75472	0.75959	0.72881
GDSC_capan1	0.69735	0.79836	0.80597	0.76128	0.73478	0.77245	0.80036	0.77648	0.77687	0.75011	0.76435	0.7538	0.75281	0.74918	0.73113	0.75602	0.78065	0.72563	0.76172	0.72104	0.76833	0.72902	0.78165	0.72237	0.77529	0.79409	0.68858	0.74477	0.72181	0.73162	0.81473	0.78086	0.74426	0.74443	0.73967	0.80753	0.7514	0.77542	0.77213	0.77983	0.78776	0.70048	0.79162	0.77135	0.74809	0.70049	0.81418	0.79431	0.73729
GDSC_capan2	0.7183	0.8146	0.80034	0.7698	0.75493	0.79212	0.82202	0.79223	0.79442	0.77119	0.78932	0.77474	0.76173	0.76837	0.75648	0.77429	0.7929	0.74729	0.78119	0.73864	0.78157	0.74138	0.79394	0.7399	0.79267	0.79854	0.70982	0.76847	0.7355	0.75079	0.81025	0.78269	0.7649	0.76412	0.73657	0.81236	0.77543	0.78819	0.79152	0.79118	0.80117	0.71636	0.80694	0.77775	0.77262	0.71946	0.81526	0.7954	0.75157
GDSC_cas1	0.71572	0.78039	0.7233	0.73898	0.81997	0.79722	0.77421	0.77926	0.79942	0.81336	0.80159	0.80514	0.78738	0.82088	0.77052	0.79172	0.75672	0.75976	0.79022	0.71797	0.7896	0.7209	0.77792	0.76004	0.78221	0.73224	0.69748	0.79451	0.71281	0.76272	0.72027	0.72127	0.7949	0.82863	0.7013	0.75644	0.81415	0.77725	0.74227	0.72798	0.75803	0.69455	0.75041	0.7375	0.80493	0.70474	0.73997	0.74131	0.77923
GDSC_ccfsttg1	0.72313	0.76579	0.72525	0.73345	0.82008	0.78225	0.76276	0.77721	0.78642	0.7947	0.78474	0.79829	0.78708	0.80175	0.774	0.79234	0.75855	0.75866	0.79138	0.71916	0.7876	0.72829	0.77253	0.76472	0.77543	0.73742	0.7058	0.77598	0.7185	0.76322	0.72636	0.72917	0.77286	0.82554	0.70136	0.75124	0.79742	0.7667	0.73239	0.72707	0.75095	0.6998	0.75392	0.74053	0.79787	0.71254	0.74212	0.73797	0.78213
GDSC_cck81	0.71314	0.75632	0.79951	0.77385	0.71326	0.76367	0.76701	0.75908	0.75396	0.72044	0.73794	0.72764	0.72799	0.72343	0.7262	0.74077	0.75092	0.73235	0.74487	0.73673	0.74225	0.7368	0.75375	0.72326	0.74731	0.78141	0.70771	0.72733	0.73278	0.74169	0.77073	0.76713	0.70392	0.72119	0.73815	0.77053	0.7297	0.74132	0.7259	0.73543	0.73861	0.72259	0.76893	0.771	0.73534	0.71699	0.75907	0.78751	0.71989
GDSC_cfpac1	0.68951	0.80594	0.78137	0.7468	0.74696	0.76849	0.79959	0.78469	0.78627	0.7729	0.77679	0.76886	0.75947	0.75976	0.73343	0.76304	0.77357	0.72207	0.77085	0.7097	0.77883	0.71448	0.78361	0.72318	0.78328	0.77304	0.67757	0.75976	0.70311	0.7264	0.79889	0.76201	0.77232	0.75519	0.72855	0.80535	0.768	0.78686	0.78176	0.78007	0.78967	0.6815	0.7762	0.75269	0.75946	0.69232	0.81096	0.77567	0.74156
GDSC_cgthw1	0.7038	0.76431	0.71822	0.73234	0.79924	0.77914	0.74879	0.76109	0.77067	0.79186	0.778	0.77867	0.77161	0.78569	0.75791	0.7764	0.75051	0.75228	0.78448	0.71216	0.76552	0.71057	0.76273	0.75771	0.75942	0.71762	0.68606	0.77297	0.70812	0.74721	0.7116	0.71394	0.77574	0.79832	0.70397	0.74872	0.78379	0.75911	0.72615	0.71378	0.74455	0.6875	0.73616	0.72891	0.78603	0.69869	0.72586	0.72912	0.76039
GDSC_chagok1	0.71819	0.78312	0.78692	0.78343	0.75538	0.78578	0.80238	0.77263	0.77453	0.75341	0.77355	0.75795	0.75832	0.7644	0.75773	0.77462	0.78403	0.75507	0.77957	0.74503	0.76938	0.74171	0.78486	0.74738	0.76726	0.77522	0.70888	0.75295	0.73667	0.76365	0.75277	0.79294	0.74386	0.76454	0.73389	0.79267	0.75305	0.7572	0.75869	0.75888	0.77898	0.71997	0.80686	0.79004	0.7714	0.71569	0.77674	0.77686	0.7543
GDSC_chp126	0.71305	0.69983	0.67889	0.73031	0.70922	0.74493	0.70514	0.71335	0.71154	0.70571	0.71644	0.70688	0.70805	0.72277	0.71079	0.72381	0.68829	0.7395	0.73247	0.70238	0.69416	0.69559	0.71126	0.73051	0.70292	0.68666	0.69406	0.71414	0.70305	0.72801	0.64674	0.68116	0.68247	0.72244	0.69626	0.69104	0.69984	0.69042	0.65203	0.64038	0.66284	0.69964	0.69396	0.71082	0.72104	0.68829	0.65871	0.69687	0.70853
GDSC_chp212	0.73398	0.7657	0.72816	0.76313	0.7735	0.7918	0.76421	0.77322	0.77273	0.7703	0.77561	0.7763	0.76694	0.78639	0.76713	0.79091	0.74584	0.78689	0.7947	0.73651	0.76005	0.73424	0.77255	0.76839	0.76904	0.7413	0.71503	0.77296	0.72894	0.77082	0.71334	0.72792	0.75298	0.78753	0.7176	0.75101	0.76354	0.75683	0.71519	0.70254	0.7318	0.71573	0.74471	0.75051	0.78106	0.71498	0.72651	0.75014	0.76563
GDSC_cl11	0.70344	0.78567	0.78837	0.75609	0.73653	0.77158	0.78537	0.76516	0.7718	0.74701	0.7633	0.74493	0.75257	0.75187	0.73638	0.75642	0.77218	0.72976	0.76342	0.72188	0.75652	0.72827	0.76969	0.71975	0.76657	0.795	0.68986	0.74799	0.72159	0.73256	0.7901	0.7621	0.7327	0.74595	0.72561	0.78417	0.7459	0.76181	0.75514	0.76071	0.76678	0.70147	0.77325	0.76169	0.74981	0.70069	0.7847	0.79423	0.74288
GDSC_cmk	0.75404	0.71856	0.71843	0.72673	0.72247	0.75228	0.7322	0.73226	0.73598	0.71785	0.73233	0.72902	0.71996	0.72055	0.72038	0.74133	0.7081	0.73918	0.73973	0.74325	0.7111	0.75733	0.72515	0.72811	0.72099	0.72018	0.76271	0.73264	0.76103	0.72882	0.69383	0.70655	0.70653	0.71774	0.68179	0.72137	0.7233	0.72349	0.69332	0.68347	0.69537	0.75696	0.71655	0.7182	0.72082	0.76149	0.7096	0.72113	0.719
GDSC_cmlt1	0.77121	0.71474	0.71373	0.72621	0.72158	0.75292	0.72756	0.72792	0.72785	0.71375	0.7281	0.72689	0.7121	0.71953	0.7216	0.72815	0.71217	0.73251	0.73465	0.74798	0.70568	0.76324	0.71811	0.73278	0.715	0.71623	0.80651	0.72584	0.77248	0.73234	0.68915	0.70981	0.70309	0.72058	0.68718	0.72254	0.72133	0.71698	0.69199	0.68405	0.69234	0.76922	0.71924	0.72195	0.72148	0.7743	0.70346	0.70857	0.71451
GDSC_colo205	0.69653	0.76423	0.80778	0.75228	0.7171	0.74646	0.76901	0.75882	0.75249	0.72374	0.73541	0.73637	0.72992	0.72576	0.71648	0.73617	0.7548	0.71129	0.74275	0.7217	0.74963	0.72835	0.75579	0.70718	0.74388	0.78598	0.69823	0.71996	0.72244	0.72492	0.79931	0.76679	0.72661	0.72532	0.7467	0.77645	0.73279	0.75711	0.74686	0.76468	0.75582	0.70373	0.77125	0.7659	0.72251	0.69924	0.77052	0.78041	0.72406
GDSC_colo668	0.69645	0.74241	0.75577	0.76352	0.7138	0.74712	0.75515	0.74189	0.74168	0.72008	0.73364	0.74302	0.72955	0.71947	0.71165	0.73861	0.7334	0.71748	0.73763	0.71372	0.72613	0.71507	0.73284	0.72279	0.74088	0.73826	0.68382	0.71793	0.71053	0.71193	0.72934	0.73536	0.71052	0.7249	0.78045	0.75162	0.71748	0.74106	0.71291	0.70973	0.72619	0.69956	0.73859	0.75325	0.72343	0.68732	0.73542	0.74584	0.7245
GDSC_colo678	0.71888	0.79668	0.79679	0.7726	0.74648	0.78701	0.81606	0.77698	0.77672	0.75167	0.7749	0.75666	0.75861	0.76416	0.74848	0.76781	0.77956	0.74745	0.77546	0.73841	0.76767	0.74	0.77792	0.73939	0.77367	0.80485	0.71438	0.75436	0.73755	0.76107	0.7847	0.79275	0.7449	0.75372	0.736	0.7983	0.75387	0.76055	0.77129	0.77332	0.77913	0.71825	0.80836	0.79126	0.75991	0.71923	0.79441	0.80012	0.74928
GDSC_colo680n	0.7084	0.81318	0.77904	0.7569	0.76559	0.79007	0.82044	0.77883	0.78324	0.77175	0.78901	0.77787	0.76433	0.77378	0.76093	0.77312	0.81839	0.74973	0.77886	0.73029	0.78104	0.7334	0.79502	0.74322	0.78494	0.78515	0.69529	0.76194	0.72297	0.75303	0.77634	0.78578	0.76936	0.77212	0.72369	0.83038	0.7775	0.77764	0.81048	0.80638	0.82294	0.69961	0.81343	0.77764	0.77616	0.7069	0.81575	0.79073	0.75121
GDSC_colo684	0.7049	0.70848	0.69661	0.74657	0.70729	0.75326	0.71537	0.71555	0.71553	0.70548	0.71443	0.71439	0.71055	0.72111	0.72526	0.72872	0.70113	0.74552	0.73351	0.71134	0.70301	0.69942	0.71951	0.73537	0.71067	0.70018	0.68708	0.7106	0.70746	0.73762	0.66176	0.69566	0.6897	0.71889	0.70633	0.70272	0.70386	0.69511	0.66339	0.65421	0.67778	0.70023	0.70455	0.72424	0.72948	0.69251	0.67664	0.70949	0.70955
GDSC_colo741	0.7494	0.78242	0.75911	0.77408	0.7874	0.80418	0.79032	0.79488	0.79761	0.78915	0.80133	0.79038	0.82616	0.79027	0.77525	0.83718	0.76411	0.77774	0.82397	0.75945	0.78303	0.76007	0.78687	0.77169	0.7849	0.76545	0.73187	0.79567	0.7576	0.78552	0.73576	0.7592	0.76217	0.79354	0.73684	0.76808	0.78351	0.77147	0.74159	0.72809	0.74749	0.74193	0.77559	0.77013	0.78938	0.73792	0.75301	0.77098	0.82809
GDSC_colo792	0.73007	0.76963	0.75441	0.76099	0.7648	0.78847	0.77617	0.77922	0.77846	0.76966	0.77641	0.77439	0.8093	0.775	0.76583	0.81761	0.75736	0.76559	0.80263	0.74276	0.77158	0.74211	0.77494	0.75199	0.77318	0.75199	0.71333	0.76851	0.74386	0.76991	0.73555	0.7485	0.75263	0.77197	0.7236	0.75696	0.77187	0.75934	0.73549	0.7313	0.74433	0.7269	0.76089	0.75939	0.77061	0.72519	0.74207	0.75906	0.81464
GDSC_colo800	0.70441	0.74081	0.7255	0.73084	0.75005	0.76082	0.75408	0.75599	0.75719	0.75551	0.75247	0.7679	0.80004	0.76486	0.74544	0.8109	0.73173	0.7401	0.78961	0.7143	0.75614	0.71586	0.74961	0.73574	0.7518	0.72225	0.6879	0.74345	0.71323	0.74847	0.71391	0.72286	0.75474	0.76177	0.70949	0.73465	0.75976	0.74832	0.71689	0.71437	0.72858	0.6928	0.73611	0.73065	0.74864	0.7003	0.71772	0.72817	0.80469
GDSC_colo829	0.72774	0.76626	0.74426	0.75772	0.77439	0.79147	0.77301	0.77834	0.7822	0.77955	0.78703	0.77882	0.82604	0.78304	0.77061	0.83087	0.75944	0.76883	0.82292	0.74223	0.77248	0.74284	0.7769	0.75822	0.77171	0.74792	0.70846	0.77996	0.74131	0.76944	0.72797	0.74196	0.75643	0.78316	0.7187	0.75872	0.77562	0.76554	0.73382	0.72216	0.74133	0.71662	0.75561	0.74801	0.77593	0.72143	0.74111	0.75273	0.82823
GDSC_corl105	0.71948	0.79754	0.79141	0.77267	0.76677	0.79507	0.80609	0.80421	0.80217	0.78354	0.79782	0.77969	0.77919	0.788	0.75791	0.78537	0.78024	0.74957	0.7897	0.73943	0.7971	0.74273	0.80534	0.74635	0.7966	0.78686	0.7028	0.78491	0.7345	0.76059	0.78042	0.77702	0.76974	0.7853	0.74623	0.7929	0.77456	0.78366	0.77104	0.77089	0.78191	0.71499	0.79516	0.77692	0.7779	0.71193	0.78875	0.78476	0.77246
GDSC_corl279	0.68862	0.71434	0.7036	0.74577	0.69882	0.73781	0.71958	0.71195	0.715	0.70042	0.70913	0.71412	0.70621	0.70655	0.69791	0.71869	0.70451	0.7129	0.71673	0.70148	0.6931	0.69255	0.71203	0.72372	0.71068	0.6981	0.67214	0.70052	0.69424	0.70172	0.66854	0.70241	0.68624	0.70959	0.74144	0.71058	0.69655	0.70128	0.67016	0.66116	0.68501	0.68823	0.70506	0.72801	0.71057	0.67411	0.68277	0.70954	0.70347
GDSC_corl88	0.71123	0.7287	0.72939	0.77101	0.71522	0.75676	0.74387	0.72725	0.73005	0.71585	0.72927	0.73134	0.71736	0.72094	0.72314	0.73194	0.72163	0.7331	0.73833	0.72266	0.70754	0.71575	0.72671	0.74102	0.72312	0.72971	0.69993	0.71746	0.71517	0.7323	0.68886	0.72148	0.69928	0.72717	0.76161	0.7334	0.70851	0.71362	0.68844	0.67981	0.70484	0.70988	0.73724	0.75775	0.73124	0.69305	0.70805	0.7304	0.71571
GDSC_corl95	0.69374	0.71262	0.71883	0.74929	0.69833	0.72882	0.72663	0.71209	0.71576	0.70378	0.71563	0.72008	0.70605	0.70984	0.69761	0.71745	0.70495	0.70444	0.71355	0.69446	0.69237	0.69565	0.709	0.71861	0.70895	0.70891	0.67761	0.70276	0.69532	0.69945	0.68357	0.70626	0.68702	0.71339	0.75784	0.71712	0.69732	0.70753	0.68319	0.67305	0.69505	0.6904	0.71254	0.73531	0.7054	0.67306	0.69801	0.71208	0.70869
GDSC_cw2	0.71616	0.76492	0.81149	0.77731	0.7283	0.76912	0.77939	0.76422	0.75814	0.73321	0.75505	0.74432	0.73568	0.72809	0.7308	0.74759	0.75991	0.73526	0.74928	0.73802	0.74403	0.74354	0.76107	0.72799	0.75344	0.79602	0.71103	0.73944	0.73459	0.74147	0.78635	0.76786	0.719	0.73445	0.74221	0.78283	0.73912	0.7613	0.74461	0.75307	0.75233	0.72097	0.77298	0.77868	0.73758	0.71846	0.76834	0.79292	0.73173
GDSC_d283med	0.70906	0.72312	0.70412	0.73513	0.72234	0.75581	0.72493	0.73025	0.7342	0.7259	0.72975	0.72386	0.72489	0.73097	0.72614	0.74506	0.71208	0.7499	0.74731	0.70931	0.72394	0.70057	0.73079	0.73568	0.72031	0.70743	0.68767	0.72211	0.70394	0.73921	0.67617	0.70741	0.71296	0.73044	0.69112	0.71987	0.72663	0.71014	0.68455	0.67747	0.69657	0.69201	0.717	0.72369	0.74321	0.7023	0.69044	0.7203	0.71997
GDSC_dang	0.71239	0.8117	0.77648	0.75353	0.74785	0.77912	0.80068	0.77502	0.77749	0.77214	0.78484	0.758	0.75734	0.75993	0.74157	0.76898	0.79022	0.73628	0.77202	0.72417	0.76204	0.73255	0.77519	0.73905	0.77415	0.77297	0.69822	0.7634	0.72675	0.73759	0.77635	0.76339	0.75597	0.75875	0.73099	0.82246	0.76365	0.77862	0.79986	0.78192	0.7891	0.70604	0.78185	0.76085	0.75607	0.71633	0.81991	0.7767	0.7463
GDSC_daoy	0.72879	0.78878	0.73792	0.75727	0.80524	0.80384	0.78757	0.78163	0.79644	0.8014	0.79957	0.81916	0.79653	0.79753	0.77418	0.80084	0.77688	0.77208	0.81035	0.73944	0.7805	0.74501	0.78079	0.77493	0.78529	0.74994	0.70888	0.79034	0.7287	0.76896	0.72802	0.74015	0.7894	0.80789	0.71715	0.77852	0.79281	0.78404	0.74955	0.73408	0.76856	0.71453	0.76517	0.7487	0.7945	0.71181	0.75882	0.75289	0.77842
GDSC_daudi	0.73001	0.66867	0.67887	0.67517	0.67027	0.70057	0.68436	0.684	0.68764	0.66238	0.6773	0.68027	0.67205	0.66977	0.67172	0.68081	0.66669	0.68121	0.68523	0.7102	0.66842	0.73341	0.67021	0.66951	0.66919	0.68262	0.7319	0.67914	0.74848	0.68506	0.65634	0.67488	0.65624	0.66552	0.63837	0.6755	0.67268	0.66996	0.65323	0.65693	0.64893	0.78427	0.68241	0.67695	0.67144	0.74048	0.66341	0.66513	0.66984
GDSC_db	0.75932	0.70441	0.71065	0.72537	0.70758	0.74546	0.7181	0.71642	0.72136	0.69775	0.71194	0.70558	0.70545	0.70444	0.71199	0.71893	0.6908	0.72739	0.72549	0.74618	0.69301	0.7563	0.70865	0.71472	0.69948	0.71046	0.76673	0.71461	0.7759	0.72958	0.67642	0.70255	0.68222	0.70673	0.67642	0.7043	0.70461	0.69554	0.67483	0.66729	0.67214	0.81643	0.7087	0.71578	0.71281	0.76102	0.68751	0.70692	0.70117
GDSC_dbtrg05mg	0.71866	0.79172	0.73973	0.75434	0.80076	0.79826	0.78613	0.79005	0.80387	0.8067	0.80719	0.80811	0.803	0.81912	0.77281	0.80211	0.77022	0.76014	0.80819	0.72619	0.79164	0.72846	0.78546	0.76299	0.7914	0.75028	0.69625	0.79646	0.71937	0.76257	0.73922	0.73552	0.78922	0.81821	0.71883	0.773	0.79545	0.78043	0.75268	0.738	0.76444	0.69911	0.76069	0.74957	0.79613	0.70416	0.75757	0.75164	0.79169
GDSC_del	0.72081	0.73422	0.72877	0.72048	0.73553	0.75671	0.74321	0.74706	0.75354	0.73644	0.74138	0.74714	0.73749	0.73692	0.72228	0.74564	0.73049	0.72342	0.74774	0.7409	0.73702	0.74916	0.73481	0.71436	0.73306	0.72211	0.72896	0.74261	0.74629	0.72601	0.71283	0.71178	0.73086	0.74132	0.68576	0.734	0.74538	0.74143	0.71912	0.71612	0.71467	0.73025	0.72743	0.71547	0.73441	0.73328	0.71858	0.71547	0.7347
GDSC_detroit562	0.68726	0.79279	0.77592	0.74267	0.74501	0.76547	0.79953	0.76482	0.76666	0.75752	0.77146	0.76336	0.75278	0.75072	0.73091	0.75777	0.80182	0.7297	0.75678	0.70754	0.7666	0.7195	0.76822	0.7247	0.76805	0.76483	0.67131	0.74912	0.70424	0.72329	0.76794	0.76691	0.75978	0.7557	0.71909	0.8169	0.76205	0.77298	0.80177	0.80341	0.81459	0.68328	0.78171	0.76174	0.75363	0.68866	0.80656	0.76883	0.74281
GDSC_dkmg	0.70601	0.76251	0.70989	0.73025	0.8195	0.78136	0.76256	0.76785	0.78388	0.80498	0.79531	0.80192	0.78998	0.81288	0.765	0.78909	0.74719	0.75647	0.78767	0.70975	0.77844	0.71775	0.7653	0.75822	0.77363	0.72352	0.68773	0.78916	0.70571	0.75276	0.71103	0.70847	0.78279	0.82396	0.69445	0.74183	0.79692	0.76842	0.72591	0.71391	0.74744	0.68639	0.73493	0.72737	0.79385	0.69397	0.72958	0.72743	0.78408
GDSC_dms114	0.74378	0.74818	0.73043	0.7703	0.7609	0.79893	0.75929	0.75698	0.75773	0.74763	0.76261	0.7584	0.74967	0.76753	0.78305	0.76936	0.74054	0.80001	0.77978	0.74686	0.74026	0.73503	0.76848	0.77733	0.75349	0.73786	0.72914	0.75248	0.73764	0.79334	0.70395	0.73223	0.73891	0.7663	0.71658	0.74496	0.75387	0.73731	0.70771	0.69798	0.72452	0.73086	0.75087	0.75723	0.77758	0.72738	0.71473	0.74691	0.74848
GDSC_dms273	0.72967	0.74469	0.72213	0.76276	0.75242	0.77859	0.75078	0.7539	0.75621	0.75143	0.75919	0.76851	0.75589	0.75597	0.74908	0.7691	0.7458	0.76481	0.76826	0.74136	0.74305	0.7334	0.75517	0.75704	0.75365	0.72913	0.70494	0.75051	0.73358	0.75409	0.69656	0.72327	0.72704	0.76171	0.7251	0.74889	0.75099	0.74596	0.70113	0.69325	0.72261	0.72288	0.73626	0.74661	0.75981	0.7143	0.71282	0.73971	0.75004
GDSC_dms53	0.67862	0.73944	0.73992	0.75994	0.71727	0.74186	0.75013	0.7418	0.7429	0.73009	0.73521	0.74912	0.73464	0.72965	0.70749	0.73706	0.72497	0.71292	0.74078	0.70855	0.72963	0.70873	0.74108	0.72065	0.74286	0.723	0.66382	0.72516	0.701	0.70801	0.72011	0.72461	0.72711	0.72986	0.79285	0.74391	0.73471	0.75095	0.71053	0.70331	0.73184	0.6816	0.72989	0.73908	0.72854	0.67305	0.72568	0.74205	0.72698
GDSC_dms79	0.67787	0.70714	0.69505	0.72619	0.69427	0.7244	0.71199	0.69371	0.7007	0.68855	0.69695	0.69987	0.68836	0.69699	0.69959	0.70124	0.70309	0.69984	0.7038	0.67795	0.68603	0.6768	0.69694	0.71294	0.69267	0.69653	0.66874	0.68378	0.67756	0.70161	0.66831	0.70007	0.67529	0.70487	0.70017	0.7062	0.68572	0.68275	0.67349	0.66844	0.68609	0.67028	0.71284	0.72433	0.70015	0.66675	0.68399	0.69786	0.68933
GDSC_dnd41	0.78527	0.71961	0.7109	0.72483	0.72543	0.7591	0.73169	0.73017	0.73482	0.71396	0.72982	0.72358	0.71463	0.71748	0.72244	0.73237	0.70444	0.73924	0.73891	0.75118	0.70456	0.76311	0.71583	0.73179	0.71257	0.72171	0.83362	0.7294	0.76972	0.74138	0.68307	0.70887	0.69542	0.72148	0.66916	0.71543	0.71607	0.70824	0.68336	0.67274	0.67947	0.7832	0.72101	0.72242	0.72645	0.78397	0.69853	0.71078	0.71344
GDSC_dohh2	0.75746	0.68938	0.69918	0.70089	0.69239	0.72506	0.70725	0.7068	0.71041	0.68663	0.69927	0.7097	0.69584	0.69398	0.69718	0.70692	0.68468	0.70911	0.70835	0.73361	0.68842	0.75737	0.69161	0.69804	0.69457	0.69808	0.7579	0.6999	0.77656	0.70738	0.67788	0.68684	0.68549	0.69473	0.66336	0.69952	0.69989	0.69979	0.67636	0.67625	0.67035	0.81372	0.69568	0.6982	0.69463	0.76913	0.68041	0.68551	0.69705
GDSC_du145	0.737	0.81869	0.78635	0.78391	0.78199	0.82436	0.82305	0.81131	0.82121	0.79862	0.81683	0.78935	0.78757	0.79706	0.78369	0.80103	0.80065	0.77256	0.80344	0.75863	0.80211	0.75379	0.82393	0.76283	0.81341	0.78958	0.72322	0.79546	0.74947	0.77807	0.77286	0.78033	0.77565	0.7895	0.73917	0.80998	0.79729	0.79441	0.78246	0.77526	0.79082	0.73692	0.80224	0.77772	0.80456	0.73114	0.79428	0.79439	0.77379
GDSC_du4475	0.69155	0.71916	0.73315	0.73482	0.69201	0.73249	0.72761	0.71828	0.7176	0.69458	0.70342	0.70413	0.70248	0.71153	0.70645	0.72215	0.71539	0.70667	0.72133	0.70021	0.70766	0.69913	0.71145	0.70072	0.70948	0.72363	0.68222	0.69196	0.70419	0.71449	0.70459	0.72021	0.6869	0.70598	0.72088	0.71924	0.70092	0.70344	0.68933	0.69365	0.69862	0.69004	0.72373	0.73174	0.70695	0.68915	0.70297	0.72319	0.70328
GDSC_ebc1	0.70135	0.80055	0.7722	0.7513	0.75043	0.77915	0.79886	0.78209	0.78408	0.77234	0.77858	0.75873	0.75675	0.76124	0.74134	0.76372	0.76768	0.73283	0.77101	0.72423	0.77385	0.72911	0.77612	0.72781	0.77601	0.76657	0.69612	0.76169	0.72108	0.74034	0.77468	0.76412	0.76755	0.76009	0.7267	0.79588	0.76734	0.77796	0.78013	0.77366	0.77232	0.70232	0.7839	0.75922	0.76326	0.70989	0.78966	0.76606	0.74717
GDSC_ecc10	0.71404	0.73362	0.73062	0.75082	0.72341	0.76314	0.73971	0.72741	0.7318	0.71636	0.72611	0.72151	0.71936	0.72907	0.73291	0.73867	0.72358	0.73613	0.74255	0.71452	0.72021	0.71124	0.73074	0.73101	0.72125	0.73586	0.70085	0.71587	0.7166	0.74521	0.70549	0.72366	0.70406	0.73152	0.7195	0.72886	0.71697	0.71134	0.68995	0.687	0.70121	0.70583	0.73503	0.74501	0.73333	0.7043	0.7071	0.73698	0.71771
GDSC_ecc12	0.68566	0.70449	0.71073	0.74047	0.70229	0.73908	0.71826	0.71593	0.71405	0.69973	0.70764	0.72006	0.70699	0.7086	0.7086	0.72211	0.69398	0.71964	0.72576	0.7095	0.7009	0.69806	0.71787	0.71406	0.70676	0.70199	0.67751	0.70477	0.69878	0.71551	0.68927	0.69975	0.70296	0.70592	0.7505	0.70688	0.70199	0.71666	0.67436	0.66611	0.68718	0.68782	0.70143	0.71983	0.71468	0.6787	0.68283	0.72372	0.70523
GDSC_ecgi10	0.70291	0.79528	0.77837	0.75623	0.74526	0.77903	0.79746	0.77805	0.77514	0.76349	0.77519	0.76151	0.75467	0.76101	0.74399	0.76626	0.80741	0.74294	0.77186	0.73048	0.77443	0.73344	0.78846	0.73294	0.77486	0.77158	0.6883	0.75879	0.72511	0.73767	0.76291	0.76033	0.75868	0.76379	0.73096	0.81948	0.76941	0.77929	0.79347	0.79664	0.80306	0.70044	0.78325	0.76312	0.76028	0.70107	0.79458	0.76737	0.74674
GDSC_efm192a	0.71748	0.77109	0.79047	0.7858	0.7432	0.77566	0.79735	0.77186	0.76726	0.74612	0.76158	0.75722	0.74775	0.75671	0.75219	0.75954	0.76773	0.74814	0.76477	0.74027	0.76177	0.74299	0.77216	0.74056	0.76069	0.78274	0.70956	0.74369	0.73149	0.75794	0.7586	0.8213	0.73461	0.75096	0.73857	0.78851	0.75352	0.75807	0.7553	0.76386	0.7744	0.71501	0.80845	0.82335	0.75896	0.71806	0.77847	0.78218	0.74668
GDSC_efo21	0.6947	0.77229	0.74946	0.73633	0.74699	0.77017	0.77758	0.77299	0.77627	0.76126	0.77039	0.7591	0.75163	0.76094	0.73766	0.75744	0.75115	0.73511	0.76449	0.71382	0.7722	0.71508	0.77284	0.72842	0.77282	0.74408	0.68223	0.74521	0.71163	0.74098	0.74936	0.74124	0.76534	0.75406	0.70679	0.773	0.76066	0.76432	0.74338	0.74645	0.76732	0.68753	0.76427	0.74059	0.75913	0.69487	0.75907	0.75874	0.73778
GDSC_efo27	0.73169	0.82827	0.78563	0.77346	0.78756	0.82068	0.82008	0.80782	0.81655	0.80081	0.81372	0.78154	0.78722	0.80131	0.78191	0.79622	0.80482	0.77306	0.80852	0.74666	0.80633	0.74684	0.81385	0.76619	0.80238	0.78965	0.7182	0.78859	0.74214	0.7895	0.78135	0.78283	0.78142	0.79442	0.72989	0.80724	0.79352	0.78015	0.78225	0.78064	0.79147	0.72107	0.81039	0.77826	0.80547	0.72733	0.80251	0.79631	0.77084
GDSC_eheb	0.71601	0.69811	0.6962	0.69084	0.69632	0.71789	0.71193	0.71578	0.71526	0.69585	0.70279	0.72518	0.70926	0.69496	0.69465	0.70803	0.68801	0.69783	0.71284	0.73054	0.69901	0.75358	0.6962	0.68648	0.70432	0.69158	0.72559	0.70429	0.75882	0.69297	0.68076	0.68386	0.70421	0.69661	0.66823	0.70192	0.70419	0.71704	0.68631	0.69007	0.68493	0.74748	0.69636	0.69233	0.69433	0.73133	0.69216	0.68705	0.7023
GDSC_ejm	0.73628	0.73249	0.74073	0.74539	0.72185	0.75596	0.7482	0.73481	0.73944	0.72361	0.73492	0.74206	0.73273	0.72197	0.72041	0.73598	0.72245	0.73125	0.74459	0.77667	0.72047	0.7887	0.7325	0.72123	0.72551	0.7366	0.73649	0.73024	0.79594	0.72751	0.70692	0.73583	0.71099	0.72339	0.71778	0.7339	0.72555	0.72976	0.70704	0.70396	0.71507	0.76504	0.74126	0.73913	0.72675	0.74145	0.72545	0.73609	0.72172
GDSC_em2	0.77012	0.73713	0.74104	0.74614	0.73619	0.77389	0.75177	0.74951	0.7526	0.7304	0.74956	0.74529	0.73358	0.72991	0.7384	0.75197	0.73258	0.74903	0.75168	0.76819	0.72886	0.77741	0.73916	0.74066	0.73604	0.73964	0.7854	0.74286	0.78152	0.74614	0.71118	0.72961	0.72089	0.73102	0.69659	0.74729	0.74684	0.74211	0.7177	0.71264	0.71676	0.7812	0.74119	0.74098	0.73954	0.79211	0.72492	0.73772	0.72854
GDSC_en	0.75207	0.77703	0.76565	0.79011	0.77408	0.81794	0.78568	0.78541	0.7863	0.76967	0.78468	0.77055	0.77225	0.78633	0.78849	0.78752	0.76917	0.79636	0.79896	0.76527	0.77121	0.7559	0.79308	0.77764	0.77777	0.7744	0.73865	0.77259	0.7614	0.80861	0.73727	0.76629	0.75001	0.77761	0.73705	0.7742	0.77364	0.75713	0.73676	0.73069	0.7498	0.74901	0.78581	0.77956	0.79243	0.74433	0.74984	0.78001	0.76536
GDSC_eplc272h	0.71192	0.82445	0.77267	0.75345	0.76884	0.79254	0.81357	0.78513	0.79585	0.77958	0.7917	0.7653	0.77247	0.77286	0.75267	0.77409	0.81303	0.74089	0.78418	0.72833	0.77725	0.72947	0.78655	0.73941	0.77678	0.7766	0.69818	0.77005	0.72302	0.75095	0.76243	0.77255	0.76359	0.77559	0.71501	0.82251	0.78166	0.77147	0.81038	0.80207	0.80752	0.70621	0.802	0.76824	0.78457	0.70945	0.8067	0.77528	0.75374
GDSC_es2	0.72495	0.7886	0.74088	0.74935	0.79566	0.80581	0.78576	0.78731	0.79999	0.81984	0.81431	0.79736	0.7947	0.7952	0.76545	0.80696	0.76392	0.76489	0.80458	0.73717	0.78255	0.73807	0.78285	0.76019	0.79091	0.73863	0.7058	0.82102	0.73504	0.75455	0.73193	0.72893	0.79849	0.79438	0.71126	0.77502	0.8064	0.79203	0.75424	0.73594	0.76173	0.71689	0.74704	0.73688	0.79789	0.72542	0.75264	0.74838	0.77909
GDSC_ess1	0.73473	0.81128	0.76015	0.76112	0.80717	0.81561	0.81199	0.80185	0.81513	0.81356	0.82658	0.81104	0.79677	0.81262	0.77998	0.80349	0.78894	0.77249	0.80261	0.74033	0.79599	0.74629	0.8028	0.77103	0.80784	0.76882	0.71994	0.80405	0.73786	0.77144	0.75398	0.75716	0.79553	0.81	0.71834	0.79502	0.8132	0.79414	0.77693	0.7674	0.78914	0.7226	0.78218	0.75411	0.81372	0.72901	0.78221	0.77243	0.77951
GDSC_fadu	0.73182	0.80831	0.79492	0.78047	0.76482	0.80674	0.82326	0.79084	0.79298	0.76847	0.79295	0.77663	0.76695	0.77038	0.76718	0.77946	0.82024	0.76575	0.78642	0.75666	0.78385	0.76016	0.79228	0.75449	0.78784	0.79481	0.72595	0.77076	0.74733	0.76615	0.77544	0.79633	0.75877	0.77167	0.73922	0.83101	0.77706	0.7789	0.81122	0.80932	0.81337	0.73332	0.81759	0.79173	0.77866	0.73644	0.81752	0.78798	0.76075
GDSC_ftc133	0.7053	0.78301	0.73518	0.74553	0.78586	0.7922	0.77929	0.77802	0.79864	0.80183	0.79605	0.80121	0.78268	0.7951	0.7641	0.78073	0.7558	0.75208	0.78572	0.72327	0.78793	0.73264	0.77633	0.74846	0.78812	0.74236	0.692	0.78517	0.71998	0.75436	0.73201	0.73743	0.79447	0.79861	0.70681	0.76437	0.80198	0.78277	0.74899	0.7389	0.76149	0.69566	0.76075	0.73645	0.79523	0.70286	0.76261	0.7423	0.76877
GDSC_fu97	0.69189	0.72908	0.73291	0.73459	0.71186	0.75295	0.73741	0.74039	0.74014	0.71285	0.71991	0.71639	0.72332	0.71999	0.72932	0.73385	0.7127	0.73806	0.74339	0.71782	0.7355	0.70917	0.74403	0.71707	0.72509	0.7423	0.68519	0.71028	0.71327	0.74302	0.72157	0.73621	0.70693	0.71329	0.70767	0.73308	0.7217	0.72144	0.69746	0.70155	0.71137	0.68943	0.74134	0.72957	0.73201	0.69382	0.72054	0.7762	0.70498
GDSC_fuov1	0.71715	0.78961	0.74766	0.75977	0.78461	0.79911	0.79067	0.79131	0.80161	0.80153	0.80102	0.80019	0.78762	0.79839	0.76697	0.79007	0.76736	0.76959	0.79656	0.73061	0.79306	0.73586	0.78863	0.76423	0.79991	0.75365	0.69801	0.78666	0.72519	0.76715	0.73866	0.75114	0.7918	0.79569	0.72467	0.77771	0.79744	0.78576	0.75387	0.7399	0.77153	0.70267	0.77051	0.75552	0.7976	0.71099	0.76542	0.76654	0.77401
GDSC_g292clonea141b1	0.71112	0.76585	0.70917	0.73017	0.80096	0.79098	0.75488	0.76461	0.77564	0.79318	0.78036	0.77721	0.77413	0.79052	0.76495	0.78446	0.74665	0.76152	0.79047	0.71279	0.76611	0.71161	0.76062	0.75887	0.76385	0.72169	0.69206	0.77629	0.70915	0.75495	0.71006	0.71414	0.77033	0.79957	0.6917	0.74615	0.78455	0.75706	0.72146	0.70827	0.73529	0.69029	0.73476	0.72649	0.80262	0.7032	0.726	0.73032	0.76658
GDSC_g361	0.71253	0.76409	0.73824	0.75233	0.76303	0.7818	0.76446	0.7689	0.77607	0.76897	0.76963	0.77048	0.80934	0.7718	0.76301	0.8139	0.74709	0.75695	0.80433	0.73734	0.76828	0.73605	0.76938	0.74729	0.76477	0.7377	0.6964	0.76198	0.73198	0.75988	0.72172	0.73729	0.75081	0.7706	0.71966	0.74838	0.76382	0.75458	0.72461	0.71885	0.73361	0.70772	0.75168	0.74306	0.76814	0.70816	0.73556	0.74789	0.80396
GDSC_g401	0.72389	0.73971	0.73123	0.74984	0.74264	0.78223	0.75062	0.7512	0.75261	0.73551	0.74571	0.73821	0.73749	0.7599	0.77701	0.75805	0.73183	0.79262	0.76173	0.72954	0.74619	0.72466	0.75626	0.74762	0.74745	0.73917	0.71525	0.74504	0.72934	0.78068	0.70982	0.72998	0.73107	0.74737	0.69638	0.7415	0.74496	0.72704	0.70709	0.70538	0.71652	0.71748	0.74476	0.74091	0.7623	0.71977	0.71889	0.7445	0.73185
GDSC_g402	0.73083	0.74938	0.74722	0.75747	0.76358	0.79607	0.76532	0.77004	0.77206	0.75338	0.76624	0.7511	0.75426	0.77117	0.79422	0.76938	0.74271	0.79299	0.77342	0.74484	0.75791	0.74226	0.77488	0.75558	0.75925	0.75247	0.72366	0.76021	0.74255	0.79166	0.72136	0.74226	0.73502	0.76617	0.70868	0.74922	0.76017	0.74385	0.71975	0.71714	0.72789	0.73057	0.75795	0.75108	0.77705	0.72615	0.7282	0.75134	0.74978
GDSC_ga10	0.76255	0.70755	0.70791	0.71063	0.70187	0.737	0.71965	0.71782	0.72217	0.69589	0.7086	0.71264	0.70591	0.70258	0.70374	0.71709	0.69327	0.71634	0.72027	0.74831	0.69647	0.76801	0.70442	0.7032	0.69887	0.70966	0.76975	0.70801	0.79091	0.72011	0.6813	0.70102	0.68986	0.70035	0.67188	0.70746	0.70729	0.70348	0.68049	0.68406	0.68013	0.82645	0.71009	0.70791	0.70889	0.77468	0.6916	0.70048	0.70139
GDSC_gamg	0.70836	0.7827	0.73708	0.73431	0.79649	0.78741	0.78121	0.78491	0.80024	0.80138	0.79427	0.80167	0.78684	0.80424	0.76984	0.78505	0.75993	0.74744	0.79147	0.72065	0.79444	0.72789	0.78181	0.74712	0.78114	0.73681	0.69731	0.78297	0.71899	0.7557	0.74431	0.73573	0.81258	0.80961	0.70966	0.77387	0.80913	0.7958	0.7661	0.75508	0.7663	0.69506	0.76144	0.73562	0.79899	0.71233	0.7522	0.73828	0.77028
GDSC_gb1	0.72264	0.76945	0.7308	0.73699	0.79218	0.78475	0.7703	0.7665	0.78497	0.78087	0.78419	0.79566	0.78191	0.79283	0.75619	0.78135	0.75369	0.75443	0.78755	0.72283	0.76872	0.7344	0.76628	0.75099	0.77168	0.73961	0.70601	0.77886	0.72164	0.75408	0.72444	0.72788	0.77231	0.80087	0.69979	0.75987	0.78737	0.76754	0.74383	0.73101	0.74568	0.70912	0.7505	0.7345	0.77784	0.71777	0.74511	0.73734	0.76941
GDSC_gct	0.71706	0.78054	0.73611	0.7339	0.78839	0.7915	0.77947	0.77657	0.78938	0.80044	0.79499	0.81141	0.78887	0.78529	0.75975	0.79055	0.75471	0.75161	0.8001	0.73343	0.77514	0.74611	0.77125	0.75102	0.77749	0.7328	0.70601	0.79528	0.73194	0.75071	0.73719	0.73306	0.81549	0.78639	0.70525	0.76956	0.79512	0.79572	0.7593	0.74539	0.76286	0.7056	0.75222	0.72571	0.78147	0.72061	0.75671	0.73934	0.76284
GDSC_gdm1	0.7545	0.70296	0.70416	0.70546	0.71108	0.73711	0.71451	0.72286	0.72243	0.70593	0.72095	0.70873	0.70555	0.70653	0.71054	0.72471	0.69867	0.72365	0.72416	0.72553	0.7016	0.74178	0.71052	0.71286	0.70396	0.7099	0.76484	0.71833	0.75166	0.71858	0.68754	0.69935	0.69286	0.70605	0.66632	0.70632	0.71299	0.70618	0.68179	0.67679	0.68391	0.75159	0.70826	0.70625	0.71046	0.76992	0.69286	0.70177	0.70597
GDSC_gi1	0.72882	0.77516	0.72851	0.75042	0.80799	0.7999	0.77647	0.77844	0.79419	0.80201	0.788	0.8135	0.78174	0.80123	0.77553	0.79925	0.75718	0.77819	0.79677	0.73377	0.78203	0.73453	0.77518	0.77017	0.77537	0.73848	0.71184	0.78515	0.72602	0.76474	0.71903	0.72041	0.78891	0.81006	0.70863	0.76264	0.8061	0.78302	0.74222	0.72433	0.75279	0.71131	0.7485	0.74071	0.80194	0.7171	0.73875	0.74504	0.77748
GDSC_gms10	0.72561	0.79881	0.74226	0.747	0.81822	0.80529	0.80135	0.78613	0.80607	0.81723	0.81527	0.82153	0.7891	0.8143	0.7728	0.79777	0.77166	0.76567	0.79585	0.72626	0.79104	0.73279	0.7861	0.76176	0.78914	0.75522	0.71259	0.79684	0.72279	0.76364	0.74049	0.74135	0.80365	0.82277	0.71064	0.77815	0.80886	0.78611	0.76553	0.75383	0.77835	0.70642	0.77373	0.75023	0.80716	0.71737	0.76886	0.75694	0.78024
GDSC_granta519	0.78107	0.72944	0.7237	0.73024	0.72689	0.75833	0.74052	0.74849	0.74778	0.72151	0.73791	0.73435	0.73103	0.72638	0.72965	0.73929	0.71349	0.73724	0.74623	0.76732	0.71813	0.7872	0.72768	0.72995	0.72824	0.73164	0.77998	0.73568	0.80024	0.73888	0.69774	0.72062	0.70426	0.72726	0.68815	0.72644	0.72957	0.72053	0.69512	0.69484	0.70004	0.81675	0.73081	0.73298	0.73261	0.78359	0.71389	0.72424	0.72163
GDSC_hara	0.7233	0.78904	0.7757	0.77726	0.75796	0.79741	0.7957	0.77268	0.77794	0.76294	0.78174	0.76739	0.75828	0.76895	0.76388	0.77516	0.80944	0.76538	0.78274	0.74593	0.76787	0.74779	0.78331	0.75731	0.7735	0.77066	0.7114	0.77054	0.73518	0.76068	0.7486	0.76011	0.75295	0.7721	0.7291	0.80809	0.76627	0.76547	0.78219	0.7736	0.78916	0.72035	0.78099	0.77106	0.77043	0.71768	0.78745	0.76962	0.75697
GDSC_hcc1143	0.71736	0.8222	0.78094	0.76081	0.76445	0.79703	0.81821	0.78393	0.78989	0.77842	0.79684	0.7726	0.77089	0.77182	0.75394	0.7786	0.81332	0.75457	0.78917	0.7378	0.77946	0.7386	0.79313	0.75315	0.7835	0.77835	0.70419	0.77425	0.72852	0.75048	0.77297	0.77774	0.77006	0.7708	0.72892	0.83015	0.78209	0.77974	0.80989	0.79865	0.81423	0.70921	0.79938	0.76609	0.77636	0.72024	0.8218	0.78606	0.75213
GDSC_hcc1395	0.71981	0.77708	0.73979	0.74485	0.7989	0.78458	0.76602	0.7798	0.78939	0.79004	0.78277	0.78291	0.78128	0.78565	0.77361	0.7865	0.77001	0.75861	0.79187	0.72752	0.78967	0.73182	0.78043	0.75289	0.7706	0.74412	0.70461	0.77116	0.72534	0.76375	0.7325	0.74883	0.76406	0.80382	0.70784	0.76473	0.78783	0.76776	0.74791	0.73888	0.75868	0.70585	0.77271	0.75041	0.80358	0.71345	0.75471	0.7489	0.77546
GDSC_hcc1419	0.69215	0.73812	0.77429	0.76994	0.71564	0.75203	0.75964	0.74249	0.73912	0.71659	0.72911	0.72539	0.71977	0.72633	0.72132	0.73136	0.73882	0.72508	0.73652	0.72205	0.73363	0.72015	0.74168	0.71511	0.72772	0.75423	0.69011	0.71246	0.711	0.7328	0.73757	0.79309	0.71171	0.72525	0.7341	0.7563	0.72201	0.72349	0.71776	0.73217	0.73796	0.69697	0.78052	0.82013	0.73511	0.69241	0.74162	0.75451	0.72068
GDSC_hcc1428	0.70895	0.74885	0.7609	0.77707	0.72831	0.76516	0.77178	0.74888	0.75028	0.73001	0.746	0.7404	0.73235	0.73728	0.73709	0.74317	0.75274	0.7385	0.75007	0.73312	0.74374	0.73138	0.75315	0.73393	0.74485	0.75738	0.70269	0.72899	0.72407	0.74541	0.73385	0.79027	0.71922	0.73944	0.73186	0.76264	0.73492	0.73714	0.73152	0.73425	0.74961	0.7084	0.78789	0.8128	0.74344	0.70586	0.74874	0.76038	0.73212
GDSC_hcc15	0.71484	0.79152	0.78698	0.76305	0.7598	0.78778	0.79565	0.78529	0.79312	0.77247	0.78777	0.774	0.76968	0.77034	0.75781	0.78126	0.77664	0.74927	0.78158	0.73668	0.78141	0.73867	0.80992	0.74615	0.78125	0.77904	0.70477	0.76394	0.73124	0.75687	0.78202	0.76979	0.76519	0.77	0.73612	0.79877	0.77669	0.78961	0.76468	0.76959	0.77857	0.71366	0.78354	0.76433	0.77804	0.71823	0.78936	0.78178	0.75598
GDSC_hcc1500	0.69255	0.73665	0.75913	0.77104	0.71795	0.75134	0.75154	0.74089	0.73609	0.72007	0.73215	0.73256	0.71874	0.72601	0.71971	0.73082	0.72803	0.72623	0.73708	0.72025	0.73259	0.71986	0.73796	0.71889	0.72888	0.74651	0.68971	0.7145	0.71154	0.73533	0.72657	0.76499	0.71885	0.73222	0.7321	0.74836	0.71835	0.73123	0.71652	0.7249	0.73049	0.69646	0.76297	0.80179	0.73349	0.68878	0.7325	0.74339	0.72237
GDSC_hcc1569	0.71922	0.77049	0.75617	0.75906	0.75346	0.78688	0.77635	0.76647	0.76874	0.75326	0.76073	0.75651	0.76797	0.75906	0.7618	0.77978	0.7659	0.75941	0.78233	0.72665	0.76786	0.72702	0.76538	0.74373	0.75314	0.75533	0.69807	0.74272	0.72466	0.76366	0.74228	0.76432	0.73772	0.76278	0.71491	0.76893	0.76016	0.75399	0.73906	0.73849	0.7519	0.70731	0.77489	0.7647	0.77474	0.71205	0.75365	0.77009	0.7634
GDSC_hcc1806	0.69588	0.80048	0.76484	0.74319	0.74181	0.77425	0.79893	0.76262	0.76807	0.75774	0.76849	0.75911	0.75226	0.75079	0.73627	0.75873	0.79423	0.73524	0.76911	0.71743	0.764	0.72124	0.77314	0.73522	0.76407	0.75839	0.68224	0.75023	0.70957	0.73277	0.76026	0.76316	0.76166	0.75192	0.71585	0.81594	0.76194	0.76449	0.79324	0.78937	0.80491	0.68739	0.78482	0.75163	0.75446	0.69939	0.8047	0.76778	0.73475
GDSC_hcc1937	0.70647	0.79162	0.78349	0.75597	0.74621	0.77555	0.80545	0.76814	0.76975	0.74995	0.77157	0.75892	0.7485	0.75388	0.74807	0.75413	0.80122	0.73335	0.76394	0.72517	0.76837	0.73102	0.77457	0.72732	0.76192	0.78069	0.70023	0.7428	0.71962	0.74683	0.77493	0.79523	0.74122	0.7569	0.71708	0.81597	0.75506	0.75859	0.79261	0.79925	0.80355	0.70262	0.81932	0.78415	0.76518	0.70564	0.81023	0.77697	0.74292
GDSC_hcc1954	0.71347	0.78786	0.79581	0.76372	0.74768	0.7759	0.80061	0.77801	0.77468	0.75772	0.77139	0.76311	0.7558	0.75671	0.74237	0.76437	0.79046	0.74099	0.76897	0.73248	0.77515	0.73783	0.77654	0.72996	0.76148	0.78607	0.69964	0.74887	0.72695	0.75003	0.76983	0.80949	0.74689	0.76062	0.72864	0.81064	0.76429	0.77315	0.78469	0.79367	0.79408	0.71018	0.8198	0.79671	0.7645	0.71577	0.79648	0.7782	0.75321
GDSC_hcc202	0.69912	0.75027	0.7718	0.77462	0.7178	0.75604	0.76901	0.74525	0.74271	0.72015	0.73131	0.7355	0.72374	0.72808	0.72863	0.73629	0.7374	0.73331	0.74433	0.72871	0.74004	0.72845	0.74311	0.7216	0.73331	0.75897	0.69876	0.71867	0.7156	0.74598	0.73531	0.80147	0.70833	0.72779	0.72344	0.75831	0.72017	0.73029	0.72473	0.73745	0.7368	0.70305	0.78377	0.81305	0.74217	0.69934	0.74708	0.75384	0.72074
GDSC_hcc2218	0.68427	0.74716	0.77106	0.75749	0.71012	0.74502	0.75215	0.7411	0.73476	0.71307	0.72532	0.71785	0.71867	0.7188	0.71667	0.72858	0.73855	0.71606	0.73614	0.71441	0.73402	0.71289	0.73887	0.70546	0.72252	0.75527	0.67975	0.70844	0.70484	0.72905	0.73583	0.7941	0.70776	0.72034	0.71811	0.75823	0.71627	0.72526	0.72286	0.7366	0.73521	0.68776	0.77399	0.80181	0.73318	0.68925	0.74656	0.75115	0.71495
GDSC_hcc366	0.72389	0.81867	0.77708	0.76509	0.78707	0.81161	0.82427	0.8016	0.81408	0.80443	0.81898	0.80088	0.79155	0.79274	0.76713	0.79594	0.79295	0.76138	0.79782	0.74605	0.7899	0.74637	0.80328	0.75257	0.79663	0.77794	0.71232	0.79407	0.73824	0.76174	0.77246	0.76661	0.7936	0.79388	0.73294	0.80821	0.79855	0.80879	0.80076	0.77989	0.79233	0.7192	0.79149	0.76475	0.79769	0.72421	0.79569	0.77767	0.77641
GDSC_hcc38	0.71444	0.80209	0.76326	0.76848	0.77905	0.79553	0.81121	0.78185	0.7868	0.78212	0.7925	0.78461	0.77408	0.77931	0.76684	0.7826	0.79151	0.75795	0.78791	0.73405	0.77473	0.73432	0.78929	0.75083	0.78339	0.77279	0.7004	0.77132	0.72148	0.7533	0.74906	0.77141	0.75976	0.78424	0.7306	0.79787	0.77553	0.77232	0.77062	0.76638	0.79249	0.70568	0.8007	0.77797	0.78612	0.70294	0.78445	0.77755	0.76492
GDSC_hcc44	0.73309	0.81471	0.77809	0.76586	0.7895	0.8176	0.80816	0.80644	0.8193	0.79982	0.80964	0.79113	0.79095	0.79081	0.77153	0.8009	0.79724	0.76444	0.8036	0.75079	0.80363	0.75312	0.81505	0.75461	0.79744	0.78084	0.72326	0.79251	0.74876	0.77033	0.77136	0.77232	0.78199	0.79237	0.72743	0.80234	0.80503	0.80497	0.77467	0.77454	0.78472	0.73223	0.79443	0.76588	0.80672	0.7343	0.79836	0.78393	0.76877
GDSC_hcc56	0.69893	0.76737	0.79574	0.75314	0.71664	0.75309	0.77244	0.75625	0.75297	0.7313	0.74228	0.73331	0.73454	0.72669	0.71869	0.7386	0.7549	0.71918	0.7476	0.71716	0.74411	0.72244	0.75208	0.71469	0.74577	0.78553	0.68888	0.72616	0.71662	0.72424	0.7898	0.76596	0.72446	0.72813	0.74335	0.78173	0.73487	0.75422	0.74662	0.75918	0.75481	0.69642	0.76966	0.76324	0.7293	0.70284	0.77328	0.78754	0.72316
GDSC_hcc78	0.71831	0.79729	0.79153	0.76866	0.75118	0.78559	0.80899	0.78536	0.78817	0.7636	0.78035	0.76881	0.75744	0.75964	0.74614	0.76916	0.77826	0.74285	0.77217	0.74077	0.77407	0.74575	0.78131	0.73605	0.7811	0.78793	0.71263	0.76346	0.73589	0.74618	0.77838	0.78131	0.75814	0.76174	0.73289	0.80173	0.76612	0.78038	0.77935	0.7827	0.78347	0.72025	0.79289	0.77578	0.76372	0.72347	0.79723	0.77924	0.75017
GDSC_hcc827	0.6922	0.78175	0.77499	0.75315	0.73269	0.76387	0.79068	0.76949	0.76766	0.75236	0.76173	0.75663	0.74612	0.73823	0.72661	0.74833	0.76419	0.72431	0.75381	0.71884	0.76303	0.72534	0.76617	0.71649	0.7636	0.76743	0.68284	0.74034	0.71116	0.72706	0.77359	0.76554	0.75908	0.74592	0.73089	0.79819	0.75032	0.78849	0.76748	0.77555	0.77325	0.68909	0.77781	0.76133	0.74686	0.69602	0.78108	0.76398	0.73668
GDSC_hct116	0.72367	0.79027	0.79934	0.77993	0.75354	0.79824	0.79984	0.7866	0.7823	0.76472	0.78071	0.76833	0.76084	0.77055	0.75999	0.77784	0.78811	0.761	0.78171	0.74582	0.77756	0.74608	0.78722	0.74836	0.77897	0.78469	0.70951	0.76707	0.74402	0.76962	0.77856	0.77179	0.76067	0.7667	0.7458	0.80048	0.77157	0.78107	0.77038	0.77105	0.77856	0.72264	0.78567	0.77621	0.76697	0.72612	0.78038	0.78648	0.75813
GDSC_hct15	0.71871	0.78035	0.79882	0.77652	0.74002	0.7878	0.79396	0.77047	0.77433	0.74461	0.76088	0.74921	0.74398	0.75684	0.75098	0.76014	0.76971	0.74793	0.76462	0.7396	0.76292	0.74079	0.7719	0.73778	0.76525	0.79667	0.71293	0.74294	0.73887	0.7608	0.77665	0.77988	0.73821	0.74869	0.73873	0.78456	0.75263	0.75642	0.7527	0.76098	0.76249	0.71865	0.78809	0.78171	0.75532	0.72355	0.77613	0.79224	0.73768
GDSC_hdlm2	0.73431	0.71995	0.72057	0.72018	0.72398	0.75073	0.73466	0.73514	0.74348	0.71555	0.7289	0.73516	0.72395	0.72634	0.72071	0.73374	0.71434	0.72046	0.7328	0.74637	0.71847	0.76456	0.72511	0.7116	0.71985	0.72027	0.75026	0.72529	0.77097	0.7247	0.69301	0.71282	0.70063	0.72359	0.67831	0.71514	0.72572	0.71951	0.69754	0.6945	0.69411	0.75668	0.72244	0.71562	0.72818	0.74433	0.70428	0.70805	0.71959
GDSC_hdmyz	0.72048	0.77758	0.73538	0.74398	0.78549	0.79308	0.7664	0.77853	0.79186	0.80318	0.79832	0.78184	0.78204	0.7906	0.77486	0.78873	0.75791	0.76566	0.79151	0.72921	0.77134	0.72702	0.78019	0.75356	0.77681	0.73371	0.70168	0.79433	0.72579	0.75389	0.73051	0.72066	0.77952	0.79654	0.70413	0.76587	0.79323	0.77533	0.74048	0.7289	0.74888	0.70828	0.74337	0.73171	0.80025	0.71744	0.7431	0.73799	0.77357
GDSC_hdqp1	0.68883	0.7876	0.75822	0.7371	0.74088	0.76695	0.79794	0.75623	0.7635	0.74961	0.7591	0.76777	0.74184	0.75041	0.73317	0.75196	0.7743	0.72144	0.75435	0.70843	0.75912	0.7155	0.75674	0.71983	0.75992	0.75336	0.68041	0.7357	0.70369	0.72833	0.76472	0.76095	0.76187	0.74847	0.70828	0.7966	0.76225	0.77025	0.7809	0.77739	0.7877	0.67952	0.78538	0.75191	0.75724	0.69384	0.7769	0.75806	0.72929
GDSC_hel	0.7283	0.70732	0.70581	0.70682	0.70823	0.73931	0.71642	0.71723	0.72029	0.70183	0.71348	0.71595	0.71295	0.70619	0.70715	0.72474	0.69523	0.71972	0.72737	0.73243	0.70202	0.7385	0.7096	0.7073	0.70891	0.70849	0.74008	0.71499	0.74407	0.71533	0.68883	0.70119	0.69754	0.6996	0.66844	0.70719	0.70895	0.70762	0.67868	0.67846	0.6837	0.73317	0.70861	0.70229	0.71064	0.74607	0.69812	0.70698	0.70068
GDSC_hep3b217	0.70425	0.75486	0.75645	0.76176	0.7287	0.76541	0.76549	0.7671	0.76041	0.7362	0.7453	0.73994	0.7393	0.73398	0.73121	0.75685	0.73347	0.74926	0.7553	0.72631	0.74804	0.7202	0.76527	0.73052	0.75009	0.76078	0.6907	0.73179	0.71615	0.74345	0.73657	0.74898	0.72054	0.7311	0.73742	0.75231	0.73765	0.7466	0.71208	0.71317	0.73281	0.70243	0.75201	0.75185	0.74742	0.69762	0.73386	0.79384	0.72937
GDSC_hgc27	0.73022	0.74114	0.73072	0.76027	0.76887	0.7821	0.74718	0.7547	0.7576	0.74808	0.75942	0.76191	0.75287	0.76427	0.75934	0.77178	0.74901	0.78125	0.77909	0.73706	0.75101	0.7375	0.7573	0.76465	0.75063	0.73748	0.7118	0.75879	0.73254	0.7722	0.70549	0.73304	0.73158	0.77286	0.70316	0.73796	0.75444	0.73793	0.70746	0.6982	0.72585	0.71853	0.74364	0.74705	0.76687	0.71847	0.71916	0.74216	0.75256
GDSC_hh	0.73507	0.70283	0.70759	0.70301	0.70702	0.7362	0.71402	0.71845	0.72434	0.69798	0.71091	0.71464	0.70542	0.70604	0.70837	0.71389	0.69901	0.70979	0.71857	0.73966	0.70176	0.75379	0.70517	0.70136	0.70367	0.70733	0.75241	0.71122	0.76829	0.71039	0.68293	0.7002	0.68918	0.70497	0.66899	0.70294	0.70903	0.70731	0.68089	0.68028	0.67951	0.75267	0.70707	0.70666	0.71201	0.74719	0.69298	0.69663	0.70018
GDSC_hl60	0.73974	0.71067	0.7053	0.70111	0.7025	0.73254	0.71442	0.71811	0.72305	0.69921	0.71186	0.70496	0.70698	0.69781	0.70214	0.7175	0.6936	0.70552	0.72265	0.73429	0.70019	0.75234	0.7046	0.70646	0.69904	0.70697	0.75844	0.70516	0.75702	0.7111	0.68533	0.70772	0.6881	0.69986	0.65652	0.71144	0.70768	0.70206	0.68117	0.68333	0.68205	0.75594	0.71234	0.70473	0.71209	0.76168	0.70356	0.70339	0.69496
GDSC_hos	0.73656	0.78597	0.74342	0.75876	0.80819	0.81369	0.79651	0.78715	0.7978	0.80378	0.81062	0.80324	0.78721	0.80734	0.77846	0.80595	0.78309	0.784	0.80152	0.73767	0.7836	0.73633	0.79478	0.77863	0.79639	0.75775	0.71428	0.78751	0.73271	0.77211	0.73972	0.74465	0.78786	0.80067	0.72127	0.78089	0.80496	0.78167	0.7517	0.74078	0.77639	0.71842	0.76949	0.75925	0.80677	0.72492	0.75528	0.77162	0.77737
GDSC_hpac	0.6913	0.79511	0.79413	0.74378	0.73319	0.76392	0.79205	0.76813	0.76417	0.75033	0.76599	0.74744	0.74086	0.74143	0.72384	0.75011	0.78081	0.71936	0.75563	0.7085	0.75728	0.71845	0.7655	0.71207	0.75888	0.78434	0.68297	0.73815	0.7094	0.7199	0.81075	0.76673	0.74705	0.74179	0.72085	0.80872	0.74789	0.77192	0.78175	0.78799	0.78486	0.68785	0.77768	0.76302	0.74563	0.6953	0.81371	0.77507	0.73374
GDSC_hpafii	0.69323	0.79541	0.80582	0.74924	0.73444	0.76747	0.78991	0.7743	0.77316	0.75049	0.76806	0.74236	0.74494	0.74289	0.72911	0.74704	0.77621	0.71985	0.75786	0.71407	0.76241	0.72252	0.77797	0.71314	0.76243	0.79557	0.68779	0.74717	0.71292	0.72612	0.82927	0.77372	0.74158	0.7433	0.72996	0.80151	0.74775	0.7766	0.77768	0.78205	0.77817	0.69301	0.7825	0.759	0.74558	0.69744	0.8084	0.78848	0.72989
GDSC_hs578t	0.71283	0.77875	0.73322	0.73633	0.82284	0.79666	0.77922	0.78265	0.80485	0.81841	0.81349	0.79098	0.78824	0.81111	0.76205	0.79526	0.76333	0.75187	0.78942	0.71752	0.7859	0.71712	0.78026	0.75407	0.77862	0.74008	0.69237	0.7911	0.71856	0.75437	0.7265	0.73012	0.78152	0.81461	0.70118	0.75747	0.82275	0.77638	0.74632	0.73629	0.76158	0.69613	0.75367	0.73639	0.81309	0.71406	0.74568	0.74518	0.78043
GDSC_hs683	0.71134	0.79097	0.72702	0.73559	0.81479	0.79223	0.78107	0.78098	0.80695	0.81773	0.80545	0.81139	0.79622	0.81466	0.76588	0.79713	0.75577	0.75363	0.79521	0.71861	0.79003	0.72581	0.7775	0.75951	0.78557	0.73446	0.69537	0.80225	0.71313	0.75394	0.72627	0.72257	0.80017	0.82572	0.70183	0.75971	0.80757	0.78486	0.75039	0.73312	0.7603	0.69495	0.74824	0.72801	0.80267	0.70471	0.75368	0.73965	0.77924
GDSC_hs746t	0.69962	0.76701	0.7344	0.73223	0.77208	0.77715	0.76784	0.7665	0.78383	0.78436	0.78646	0.77119	0.76059	0.77304	0.74594	0.76651	0.74583	0.73684	0.76935	0.71858	0.76887	0.72452	0.7579	0.73125	0.76271	0.73388	0.69424	0.77616	0.71431	0.73888	0.73603	0.72278	0.78109	0.77979	0.70006	0.75337	0.78557	0.77297	0.75072	0.73934	0.74535	0.69499	0.74308	0.72957	0.76833	0.7102	0.74152	0.73165	0.76179
GDSC_hs766t	0.71782	0.79922	0.76161	0.73764	0.77979	0.79144	0.78628	0.7852	0.79381	0.79167	0.81216	0.77151	0.77419	0.7878	0.759	0.77761	0.7865	0.74644	0.78743	0.72383	0.77964	0.72972	0.78903	0.74078	0.77726	0.76624	0.70488	0.78185	0.72431	0.75265	0.77462	0.74983	0.77096	0.78694	0.70312	0.79193	0.78641	0.77959	0.77778	0.76452	0.77315	0.7057	0.7739	0.74492	0.79365	0.71719	0.79907	0.76225	0.75717
GDSC_hs940t	0.70242	0.78123	0.7255	0.72049	0.78481	0.77719	0.76861	0.77345	0.78511	0.79663	0.79407	0.78092	0.78244	0.78698	0.74936	0.78588	0.74757	0.73675	0.78554	0.70315	0.77552	0.71303	0.76977	0.74078	0.76535	0.7273	0.68828	0.77881	0.70466	0.73623	0.7302	0.72402	0.79093	0.78834	0.68812	0.75854	0.78688	0.77345	0.75647	0.74174	0.75156	0.68375	0.74364	0.72306	0.79586	0.70592	0.75	0.73222	0.76435
GDSC_hsc2	0.73013	0.83509	0.77867	0.76531	0.78819	0.81341	0.82643	0.79818	0.81086	0.80221	0.82312	0.77982	0.78468	0.79069	0.7627	0.79358	0.82167	0.75717	0.79884	0.74689	0.78185	0.74674	0.79663	0.75251	0.79056	0.78427	0.72009	0.80402	0.74338	0.75829	0.75903	0.76822	0.77141	0.7902	0.72341	0.82044	0.79565	0.78004	0.8208	0.79422	0.80444	0.72861	0.79273	0.76678	0.79374	0.72652	0.81259	0.78293	0.77219
GDSC_hsc3	0.70837	0.81414	0.77352	0.74141	0.7585	0.78381	0.80996	0.7788	0.78606	0.77642	0.78964	0.76762	0.76023	0.76668	0.74647	0.76798	0.81694	0.73736	0.77073	0.72358	0.77245	0.72847	0.7767	0.73058	0.77556	0.77248	0.69919	0.76786	0.72067	0.73878	0.7685	0.7653	0.76948	0.7657	0.70916	0.82375	0.78258	0.77997	0.83443	0.82754	0.81494	0.70309	0.7857	0.75481	0.77015	0.7158	0.8138	0.76671	0.74946
GDSC_hsc4	0.71091	0.80387	0.771	0.75155	0.76411	0.78505	0.80861	0.77421	0.7808	0.76889	0.78274	0.77755	0.76236	0.7701	0.75136	0.76568	0.82403	0.74385	0.77132	0.72592	0.77569	0.73182	0.77638	0.74111	0.77775	0.77388	0.69584	0.76235	0.71889	0.74445	0.7622	0.77106	0.76374	0.77437	0.71788	0.82365	0.77914	0.77341	0.81843	0.80936	0.81425	0.70114	0.79344	0.76945	0.76967	0.70788	0.80668	0.77226	0.75209
GDSC_ht1080	0.72385	0.79479	0.74879	0.74375	0.79912	0.80065	0.78996	0.79554	0.80945	0.82127	0.81464	0.80902	0.80139	0.81127	0.7667	0.8064	0.76799	0.75814	0.80848	0.73651	0.79386	0.74043	0.78749	0.75004	0.79179	0.75104	0.7078	0.81779	0.73465	0.75368	0.74172	0.7404	0.80673	0.80284	0.71239	0.77497	0.80742	0.79615	0.76547	0.74928	0.76674	0.70913	0.76083	0.74047	0.79412	0.7207	0.76274	0.74982	0.78424
GDSC_ht115	0.69393	0.76929	0.8095	0.75752	0.71461	0.75461	0.76897	0.76033	0.75627	0.72578	0.74471	0.72657	0.7284	0.72228	0.71489	0.73677	0.75889	0.71534	0.7403	0.7196	0.74651	0.72397	0.76008	0.70747	0.75012	0.78983	0.68554	0.72848	0.71516	0.72015	0.80135	0.7651	0.71311	0.72495	0.73105	0.78138	0.73328	0.75344	0.74524	0.75683	0.75449	0.69838	0.76702	0.76045	0.73382	0.6995	0.77795	0.79042	0.71658
GDSC_ht1197	0.69544	0.77921	0.75919	0.73637	0.73869	0.75588	0.79695	0.75894	0.76479	0.74726	0.76269	0.74353	0.74018	0.7474	0.72345	0.74686	0.76436	0.72254	0.74975	0.71132	0.75309	0.71746	0.75882	0.71266	0.74848	0.76982	0.68558	0.74154	0.70613	0.72723	0.74541	0.76744	0.73713	0.74235	0.70052	0.7844	0.74845	0.75007	0.76458	0.76063	0.76842	0.68718	0.78247	0.75819	0.74706	0.69191	0.77374	0.77294	0.73382
GDSC_ht1376	0.70369	0.78245	0.7718	0.75251	0.74083	0.77135	0.80192	0.76396	0.76716	0.75174	0.77595	0.75781	0.74823	0.74975	0.73573	0.75354	0.77782	0.73363	0.76064	0.72889	0.75246	0.73188	0.76255	0.72397	0.75635	0.76815	0.69543	0.75049	0.72004	0.73782	0.74839	0.77772	0.74064	0.74907	0.70991	0.78907	0.75337	0.75489	0.77677	0.76935	0.77718	0.69852	0.79379	0.76275	0.76242	0.70487	0.78354	0.7656	0.73823
GDSC_ht144	0.71885	0.75709	0.73504	0.74621	0.76965	0.77852	0.76122	0.76933	0.7701	0.77167	0.7717	0.78126	0.82233	0.77533	0.76141	0.82504	0.74973	0.75969	0.82359	0.73294	0.77159	0.73556	0.7665	0.74953	0.7661	0.73355	0.69758	0.76912	0.73025	0.76092	0.71963	0.73407	0.76689	0.77804	0.71348	0.75101	0.77128	0.76095	0.72987	0.7214	0.74306	0.70745	0.74931	0.74102	0.76948	0.71398	0.73195	0.74286	0.82383
GDSC_ht29	0.69528	0.76849	0.81354	0.76282	0.72089	0.75805	0.77812	0.76933	0.76163	0.73373	0.74655	0.73814	0.73077	0.73058	0.71961	0.74413	0.75676	0.72078	0.75019	0.71658	0.75856	0.72366	0.76404	0.71334	0.75257	0.79346	0.68824	0.72539	0.71477	0.72803	0.81301	0.77831	0.73316	0.73148	0.75578	0.78485	0.73605	0.76697	0.75339	0.76652	0.76183	0.69811	0.77822	0.77333	0.73388	0.70107	0.78501	0.79469	0.726
GDSC_ht55	0.69802	0.75463	0.79688	0.7529	0.705	0.74477	0.76179	0.74926	0.7427	0.7127	0.731	0.71342	0.71833	0.71774	0.71049	0.7284	0.74957	0.71205	0.73508	0.71687	0.73362	0.72312	0.74584	0.70752	0.73552	0.78677	0.69322	0.71458	0.71759	0.71897	0.7832	0.76663	0.70379	0.71557	0.73652	0.76991	0.72047	0.73758	0.73096	0.74327	0.74314	0.70394	0.76637	0.76877	0.72058	0.70271	0.75947	0.78924	0.71177
GDSC_hucct1	0.7022	0.82324	0.78189	0.74588	0.75302	0.77884	0.81429	0.78543	0.79466	0.77608	0.78951	0.77512	0.76079	0.76646	0.73592	0.76518	0.78239	0.72742	0.76879	0.71605	0.77846	0.7264	0.78432	0.71924	0.78183	0.78122	0.69525	0.76622	0.71568	0.72883	0.79468	0.76444	0.77225	0.75971	0.71545	0.8059	0.77183	0.79243	0.7982	0.79227	0.78962	0.69607	0.78133	0.75489	0.76457	0.70437	0.81108	0.77784	0.7437
GDSC_huh1	0.68315	0.72043	0.74749	0.741	0.70445	0.73933	0.73114	0.74976	0.74065	0.71145	0.72254	0.72113	0.72344	0.71328	0.7113	0.73177	0.71646	0.71702	0.73488	0.71548	0.74544	0.71184	0.75692	0.7056	0.73234	0.73594	0.67302	0.71579	0.70115	0.71997	0.73594	0.73758	0.70108	0.71129	0.72372	0.72732	0.72039	0.73593	0.69524	0.69946	0.70779	0.68615	0.73379	0.72754	0.72139	0.68298	0.71892	0.76705	0.7116
GDSC_hupt3	0.70209	0.80742	0.7886	0.75609	0.74143	0.77851	0.80474	0.77991	0.78613	0.76332	0.77837	0.75818	0.75047	0.75792	0.74176	0.75941	0.77818	0.73083	0.76523	0.72473	0.77484	0.72863	0.77932	0.72182	0.77595	0.77939	0.69354	0.75637	0.71978	0.73632	0.79079	0.77333	0.75936	0.75363	0.72696	0.80641	0.76396	0.77899	0.78321	0.78589	0.78829	0.70039	0.79081	0.76413	0.76027	0.70602	0.80629	0.77839	0.73905
GDSC_hupt4	0.70076	0.78795	0.7986	0.75979	0.73416	0.76864	0.79859	0.76595	0.76744	0.74428	0.76442	0.7536	0.74102	0.74342	0.72927	0.74986	0.77222	0.72735	0.75475	0.72711	0.7563	0.73595	0.76567	0.72042	0.76428	0.79254	0.69921	0.74179	0.72195	0.72775	0.79687	0.77799	0.74543	0.74103	0.73531	0.7976	0.74783	0.77003	0.77126	0.77498	0.77607	0.70768	0.78777	0.77324	0.74465	0.71026	0.79908	0.78261	0.73196
GDSC_ialm	0.72399	0.79661	0.75319	0.75332	0.78485	0.80668	0.80107	0.78779	0.7983	0.80489	0.81596	0.78712	0.7763	0.78597	0.76239	0.78471	0.76919	0.76102	0.78921	0.73821	0.77574	0.74308	0.78642	0.75199	0.78589	0.76225	0.71279	0.79275	0.7345	0.75239	0.75205	0.74143	0.79035	0.78742	0.71703	0.79025	0.79012	0.7988	0.77465	0.75577	0.7657	0.71553	0.76886	0.75098	0.78873	0.72003	0.77105	0.76255	0.76976
GDSC_igr1	0.7252	0.76198	0.74538	0.7521	0.76897	0.78196	0.76811	0.77426	0.7801	0.77087	0.77398	0.77718	0.81765	0.77259	0.75912	0.8221	0.7465	0.75677	0.80797	0.74304	0.76308	0.7433	0.77246	0.74807	0.76684	0.74407	0.71137	0.77124	0.73682	0.76038	0.71961	0.74157	0.7537	0.77008	0.7139	0.75427	0.77363	0.76128	0.72912	0.72001	0.73327	0.72283	0.75172	0.74665	0.76679	0.72075	0.7382	0.75258	0.81365
GDSC_igr37	0.71694	0.74627	0.73414	0.74058	0.75244	0.76784	0.7517	0.75471	0.76224	0.75559	0.75369	0.75808	0.79058	0.76156	0.75283	0.80203	0.73616	0.7482	0.78984	0.72788	0.76086	0.72897	0.75493	0.74258	0.74981	0.72773	0.70235	0.74935	0.72821	0.75846	0.7157	0.72859	0.74419	0.76256	0.70944	0.73787	0.75752	0.74128	0.71574	0.71198	0.7245	0.70688	0.74478	0.73835	0.7546	0.71392	0.72225	0.73508	0.79829
GDSC_igrov1	0.72405	0.76776	0.77323	0.7741	0.75172	0.78698	0.77922	0.79098	0.782	0.75893	0.77484	0.75867	0.75719	0.7651	0.75827	0.76857	0.76743	0.7701	0.77231	0.73474	0.7748	0.73193	0.7844	0.75449	0.78513	0.76818	0.70996	0.75561	0.73237	0.77299	0.75617	0.7592	0.74673	0.76287	0.72946	0.77591	0.76622	0.76172	0.74413	0.73711	0.75411	0.71483	0.77332	0.76946	0.76809	0.72073	0.75094	0.77771	0.75282
GDSC_im95	0.70275	0.75385	0.81662	0.76629	0.71434	0.75673	0.76387	0.75563	0.74955	0.71657	0.74007	0.73169	0.72548	0.7143	0.71756	0.73726	0.75523	0.72091	0.74093	0.72599	0.73865	0.73492	0.75213	0.71135	0.74245	0.78903	0.69678	0.72643	0.72181	0.73356	0.7854	0.76761	0.70902	0.72365	0.72853	0.77305	0.72593	0.74778	0.73824	0.74225	0.74552	0.70607	0.76661	0.76783	0.72759	0.70656	0.7693	0.77976	0.71546
GDSC_ipc298	0.72947	0.7682	0.74502	0.75705	0.77335	0.79162	0.77368	0.77661	0.78368	0.77495	0.78125	0.78029	0.8202	0.77379	0.76801	0.82451	0.75795	0.76515	0.81125	0.74653	0.77087	0.74499	0.77304	0.75861	0.77549	0.7464	0.71135	0.77662	0.74303	0.76368	0.72756	0.74154	0.75353	0.77689	0.71713	0.76016	0.77693	0.76349	0.73432	0.72689	0.74245	0.72485	0.75577	0.74584	0.77542	0.72772	0.74288	0.75342	0.82268
GDSC_ishikawaheraklio02er	0.73184	0.76971	0.76308	0.77628	0.76731	0.79075	0.77711	0.81043	0.7972	0.77237	0.78334	0.77833	0.76767	0.7755	0.76163	0.78456	0.77405	0.7687	0.78647	0.73981	0.78668	0.73519	0.79166	0.75805	0.80098	0.76432	0.70992	0.77029	0.73146	0.76479	0.74658	0.75596	0.75092	0.77704	0.73403	0.77724	0.77574	0.77581	0.73813	0.72708	0.75729	0.71971	0.77345	0.7721	0.77756	0.71925	0.75235	0.77861	0.76875
GDSC_istmes1	0.72591	0.77691	0.75018	0.75469	0.78711	0.79683	0.78928	0.78921	0.79157	0.78467	0.79848	0.78528	0.77631	0.80202	0.7686	0.78301	0.77183	0.76285	0.78598	0.73098	0.78888	0.73428	0.7874	0.76404	0.78982	0.76109	0.71369	0.77597	0.72804	0.76952	0.74094	0.75011	0.76897	0.79671	0.71949	0.7684	0.78681	0.76913	0.74927	0.74275	0.76676	0.7133	0.77454	0.76723	0.79872	0.71958	0.75098	0.76272	0.7692
GDSC_j82	0.72818	0.80973	0.75269	0.7578	0.80108	0.81273	0.81507	0.79549	0.81429	0.80434	0.82124	0.80297	0.78936	0.80856	0.76927	0.79278	0.77939	0.76119	0.79667	0.74171	0.79507	0.74411	0.79567	0.75532	0.79824	0.76748	0.71822	0.79757	0.73294	0.76217	0.75045	0.75531	0.78403	0.80157	0.71969	0.7819	0.80112	0.78176	0.77075	0.75814	0.77644	0.71921	0.78852	0.7611	0.80995	0.72048	0.77965	0.7708	0.77524
GDSC_jeko1	0.77133	0.70217	0.70689	0.7179	0.70996	0.74278	0.71875	0.71577	0.71923	0.70228	0.71479	0.72105	0.70862	0.70613	0.71437	0.71963	0.69967	0.73104	0.72732	0.7453	0.6993	0.7661	0.70622	0.7237	0.70604	0.70995	0.76389	0.70987	0.78069	0.72927	0.68546	0.70126	0.70011	0.71135	0.68082	0.71128	0.71362	0.70817	0.68332	0.67784	0.68354	0.80609	0.71077	0.71851	0.71201	0.77508	0.68695	0.7046	0.70635
GDSC_jhh1	0.70089	0.77679	0.77288	0.75782	0.73453	0.77393	0.78507	0.7748	0.77307	0.75198	0.76069	0.74405	0.74759	0.75193	0.74056	0.75659	0.75898	0.7425	0.76224	0.7194	0.76683	0.7234	0.77319	0.73361	0.76883	0.77142	0.6869	0.73982	0.71793	0.74343	0.75922	0.76629	0.74246	0.74679	0.72668	0.78114	0.75149	0.75706	0.74867	0.75363	0.76547	0.697	0.77471	0.75858	0.75731	0.70302	0.76793	0.7807	0.73618
GDSC_jhh2	0.68733	0.7704	0.74702	0.7362	0.77089	0.7662	0.76817	0.78546	0.79487	0.78133	0.77256	0.76821	0.76607	0.78093	0.7393	0.76516	0.75197	0.72822	0.76505	0.70514	0.79589	0.7096	0.78429	0.7235	0.76827	0.75375	0.67347	0.76041	0.69732	0.73979	0.75487	0.73932	0.76112	0.78528	0.71427	0.7545	0.77608	0.77807	0.74088	0.73515	0.75589	0.67682	0.75677	0.73378	0.77598	0.68047	0.75637	0.75993	0.75118
GDSC_jhh4	0.70954	0.78109	0.75115	0.75689	0.76852	0.78472	0.78455	0.80679	0.80149	0.78268	0.78812	0.7937	0.77996	0.78278	0.75073	0.78223	0.7553	0.7559	0.78821	0.72869	0.78761	0.73576	0.79163	0.74608	0.80915	0.76054	0.69442	0.78186	0.72339	0.74696	0.74903	0.74565	0.77468	0.77767	0.72727	0.76731	0.77752	0.78509	0.74508	0.73017	0.75078	0.70124	0.75759	0.74642	0.7739	0.70312	0.7539	0.76659	0.76243
GDSC_jhh6	0.70571	0.77819	0.74638	0.73654	0.7713	0.78042	0.77066	0.78199	0.79219	0.77482	0.77242	0.77415	0.76937	0.77425	0.74725	0.77702	0.75215	0.73493	0.77874	0.72132	0.7921	0.72463	0.78791	0.73518	0.77728	0.74901	0.69698	0.76522	0.72168	0.75168	0.75516	0.74742	0.77125	0.77569	0.71576	0.76467	0.77956	0.77837	0.74445	0.74098	0.75165	0.6995	0.76467	0.74252	0.77795	0.70876	0.75627	0.75771	0.75403
GDSC_jhos2	0.71338	0.81101	0.76579	0.75908	0.77164	0.79269	0.81584	0.79759	0.80135	0.79641	0.8078	0.78304	0.76994	0.79164	0.75313	0.77983	0.78538	0.74938	0.78268	0.72519	0.78285	0.72541	0.78687	0.74978	0.79788	0.77235	0.70004	0.77631	0.71977	0.74915	0.77111	0.75864	0.7866	0.78054	0.727	0.79881	0.78839	0.78363	0.78002	0.77349	0.79617	0.69998	0.78422	0.76717	0.78509	0.70756	0.7856	0.77405	0.76088
GDSC_jimt1	0.72276	0.79868	0.76862	0.76069	0.76701	0.79691	0.81881	0.78141	0.7913	0.77795	0.79524	0.77054	0.76574	0.77742	0.76243	0.77371	0.78443	0.75118	0.78218	0.73873	0.77806	0.73771	0.78776	0.74324	0.77947	0.77818	0.70911	0.76961	0.7315	0.75906	0.75659	0.7793	0.76373	0.7752	0.72292	0.79762	0.78114	0.77314	0.7785	0.77008	0.78379	0.71257	0.81217	0.77726	0.78152	0.71952	0.78105	0.78017	0.75525
GDSC_jjn3	0.75195	0.72734	0.72543	0.73786	0.73087	0.75914	0.74077	0.73953	0.7426	0.72568	0.73815	0.73853	0.73048	0.72109	0.72552	0.7432	0.72185	0.73733	0.74806	0.77476	0.71961	0.78616	0.72332	0.72624	0.72392	0.72109	0.75164	0.73418	0.7945	0.72899	0.69674	0.71712	0.71301	0.72952	0.69725	0.73047	0.7317	0.73593	0.70156	0.6973	0.70689	0.76534	0.72479	0.72904	0.73678	0.76314	0.71574	0.72042	0.72657
GDSC_jm1	0.79534	0.72335	0.72387	0.74104	0.7224	0.76223	0.73996	0.73636	0.73973	0.71326	0.7321	0.72521	0.72484	0.72277	0.72583	0.74232	0.71398	0.74446	0.74611	0.76576	0.70988	0.77509	0.72663	0.73245	0.72062	0.72924	0.78257	0.73134	0.79439	0.74385	0.69131	0.71906	0.69749	0.72125	0.69195	0.72344	0.72309	0.71248	0.68795	0.68192	0.69147	0.82581	0.72876	0.73717	0.72947	0.79256	0.70054	0.72237	0.72383
GDSC_jurkat	0.78796	0.73951	0.73336	0.75239	0.74612	0.77803	0.75265	0.74762	0.75089	0.73427	0.75205	0.75109	0.73761	0.74137	0.744	0.7555	0.73407	0.7557	0.76148	0.77072	0.72598	0.77361	0.74238	0.75054	0.7354	0.74032	0.81504	0.74947	0.78455	0.75678	0.70432	0.72588	0.71995	0.74388	0.70486	0.73722	0.73718	0.72982	0.70575	0.69512	0.70661	0.78738	0.73977	0.74623	0.74417	0.77797	0.71839	0.73283	0.74032
GDSC_jurlmk1	0.75939	0.74279	0.74573	0.75821	0.74701	0.78325	0.75951	0.75635	0.7605	0.74369	0.75417	0.75876	0.75086	0.74732	0.75082	0.76544	0.73737	0.76339	0.76723	0.76642	0.73818	0.77097	0.75148	0.75154	0.7476	0.74299	0.75961	0.75348	0.77438	0.75633	0.71732	0.73523	0.73484	0.74596	0.71314	0.75179	0.75213	0.74826	0.71943	0.71304	0.72363	0.7608	0.74665	0.74409	0.75056	0.76748	0.72927	0.74445	0.74915
GDSC_jvm2	0.76381	0.7258	0.7242	0.72291	0.72466	0.75541	0.73873	0.74575	0.74684	0.71996	0.73582	0.74025	0.73258	0.724	0.72754	0.73902	0.71622	0.73209	0.74335	0.76857	0.72153	0.79083	0.72816	0.72028	0.73056	0.72904	0.77209	0.73569	0.79825	0.72812	0.69954	0.7184	0.70563	0.72202	0.68538	0.72455	0.72704	0.72592	0.70185	0.70345	0.70238	0.79176	0.72732	0.72346	0.727	0.77429	0.71872	0.71956	0.72595
GDSC_jvm3	0.73855	0.70809	0.70676	0.70138	0.70705	0.73121	0.72168	0.72108	0.72689	0.69964	0.71377	0.7286	0.7177	0.70299	0.703	0.71942	0.6956	0.70741	0.72332	0.74605	0.70247	0.7749	0.7068	0.69327	0.70535	0.70423	0.74636	0.71612	0.77988	0.70359	0.68271	0.69794	0.70223	0.70424	0.66563	0.70985	0.71062	0.71874	0.69322	0.69165	0.68642	0.769	0.70547	0.69815	0.70369	0.75257	0.70174	0.69664	0.70801
GDSC_k562	0.724	0.72194	0.73105	0.73965	0.71792	0.75824	0.73346	0.73271	0.73609	0.71474	0.72826	0.72656	0.72709	0.72179	0.7281	0.73824	0.71559	0.74577	0.74496	0.75166	0.72066	0.75678	0.73018	0.72593	0.72008	0.72918	0.73193	0.73007	0.75117	0.74466	0.7027	0.72547	0.70395	0.71788	0.68944	0.72754	0.72357	0.72204	0.69218	0.69643	0.70113	0.73172	0.73314	0.72138	0.72994	0.73547	0.7142	0.73356	0.71409
GDSC_kals1	0.72113	0.78489	0.72796	0.74278	0.80864	0.80202	0.7881	0.78156	0.80034	0.80179	0.80239	0.80585	0.78845	0.81286	0.77101	0.79255	0.76328	0.76219	0.79385	0.7244	0.78162	0.72878	0.77595	0.75787	0.78036	0.75112	0.707	0.78487	0.71875	0.76585	0.72601	0.73094	0.77978	0.81409	0.70256	0.76544	0.79551	0.77196	0.7471	0.73605	0.75432	0.70351	0.76456	0.74182	0.80256	0.70804	0.75375	0.74494	0.77686
GDSC_karpas299	0.74984	0.7382	0.7318	0.72683	0.73507	0.76277	0.74582	0.75195	0.75971	0.7304	0.7432	0.74186	0.73921	0.73519	0.73036	0.7464	0.732	0.73251	0.74874	0.76054	0.73593	0.7685	0.74033	0.72114	0.73574	0.73297	0.76275	0.7395	0.77368	0.734	0.71038	0.72725	0.71331	0.73574	0.68782	0.73441	0.74143	0.73176	0.71055	0.71219	0.70979	0.76232	0.73699	0.72673	0.74088	0.75906	0.72612	0.72514	0.7316
GDSC_karpas422	0.75835	0.70101	0.71534	0.72779	0.71379	0.74751	0.7224	0.7171	0.71825	0.70049	0.71859	0.72155	0.70828	0.70337	0.71799	0.72063	0.69995	0.73254	0.72706	0.75437	0.69277	0.76439	0.70763	0.71739	0.70339	0.71515	0.76918	0.71641	0.77877	0.73119	0.67769	0.70162	0.68956	0.70762	0.67778	0.71098	0.70753	0.70098	0.68212	0.67715	0.67962	0.80721	0.71314	0.72076	0.71059	0.76301	0.68852	0.70288	0.70541
GDSC_karpas620	0.75754	0.72791	0.73077	0.73906	0.72716	0.75665	0.74236	0.73239	0.73609	0.72495	0.74201	0.7397	0.73256	0.72424	0.723	0.74194	0.72558	0.73232	0.74729	0.77337	0.71591	0.7947	0.72841	0.72753	0.72525	0.73121	0.7587	0.73813	0.80697	0.73415	0.70125	0.72828	0.71291	0.7287	0.70288	0.73259	0.72889	0.72597	0.70703	0.69897	0.71121	0.78307	0.733	0.73601	0.72892	0.76845	0.71911	0.72902	0.72474
GDSC_kasumi1	0.75055	0.71985	0.71194	0.72002	0.71238	0.75119	0.72283	0.72352	0.72806	0.70875	0.72346	0.70863	0.71121	0.70772	0.71838	0.73067	0.70848	0.72948	0.7331	0.73845	0.70714	0.74542	0.71873	0.72294	0.70876	0.71369	0.75645	0.7195	0.75445	0.73155	0.69052	0.71049	0.69465	0.70903	0.67574	0.71866	0.71772	0.70895	0.68374	0.68471	0.69039	0.75053	0.71624	0.71817	0.72657	0.76463	0.70813	0.71755	0.70314
GDSC_katoiii	0.70888	0.76729	0.81205	0.75782	0.72365	0.76439	0.77299	0.75656	0.75685	0.72826	0.74746	0.73058	0.73591	0.72939	0.72472	0.74608	0.75602	0.72582	0.75325	0.73095	0.74516	0.74248	0.75639	0.7203	0.7441	0.79941	0.70914	0.73289	0.73838	0.74071	0.7874	0.77335	0.7235	0.73244	0.72994	0.77532	0.73572	0.74724	0.74452	0.76029	0.75375	0.71657	0.77475	0.77162	0.74001	0.72112	0.77843	0.78249	0.72619
GDSC_kcl22	0.76122	0.74098	0.734	0.73832	0.74182	0.7743	0.7515	0.75268	0.75902	0.74229	0.75011	0.75045	0.73816	0.74152	0.74685	0.75949	0.72938	0.75624	0.7593	0.75288	0.7384	0.76659	0.74243	0.74333	0.73691	0.73209	0.76751	0.74458	0.76703	0.74761	0.71424	0.72462	0.73147	0.7417	0.69303	0.7451	0.75153	0.75577	0.71833	0.7159	0.71534	0.75643	0.73486	0.73146	0.74992	0.78082	0.73245	0.73197	0.73299
GDSC_ke37	0.7833	0.7244	0.71741	0.73407	0.72061	0.75723	0.73543	0.73098	0.73671	0.71567	0.72946	0.7262	0.71783	0.71778	0.72361	0.73678	0.71482	0.73488	0.7405	0.75988	0.70921	0.76645	0.72095	0.73043	0.71472	0.72308	0.82038	0.72912	0.77722	0.73959	0.68851	0.71656	0.6937	0.72	0.68068	0.71959	0.71653	0.70885	0.68883	0.67951	0.68691	0.78728	0.72465	0.72745	0.72663	0.77782	0.70649	0.71516	0.7157
GDSC_kelly	0.7158	0.70916	0.68816	0.73979	0.71901	0.75073	0.70966	0.71879	0.71727	0.71236	0.71949	0.72132	0.71789	0.72436	0.72279	0.73298	0.69773	0.75302	0.74524	0.71486	0.70326	0.70489	0.71875	0.74157	0.71306	0.69363	0.69082	0.71844	0.70805	0.73734	0.65686	0.69306	0.69972	0.73043	0.70602	0.70171	0.70883	0.70507	0.6618	0.64919	0.6747	0.70196	0.69938	0.71636	0.73034	0.69526	0.66934	0.70703	0.71131
GDSC_kle	0.71037	0.76965	0.74717	0.75862	0.75931	0.77932	0.78324	0.77045	0.77423	0.76517	0.77563	0.77522	0.757	0.77134	0.75011	0.7665	0.76392	0.75896	0.77186	0.72138	0.76348	0.72477	0.77039	0.74805	0.77364	0.75795	0.69247	0.75183	0.71246	0.75369	0.73352	0.74617	0.75422	0.76584	0.71379	0.76938	0.75901	0.75754	0.7406	0.73347	0.76295	0.69806	0.76291	0.75751	0.77079	0.69954	0.75423	0.76414	0.75035
GDSC_km12	0.72286	0.77827	0.82381	0.78071	0.74048	0.77998	0.78486	0.77712	0.77187	0.74572	0.76673	0.75081	0.74848	0.74354	0.74274	0.76221	0.7761	0.74467	0.76702	0.74252	0.75731	0.74635	0.77207	0.73211	0.76564	0.809	0.71382	0.75165	0.74323	0.74713	0.79759	0.777	0.73216	0.74784	0.74813	0.7957	0.75333	0.76783	0.75539	0.75886	0.7601	0.72669	0.7805	0.7843	0.75129	0.72689	0.77882	0.79623	0.74299
GDSC_kmh2	0.73937	0.71487	0.71198	0.72174	0.72021	0.74973	0.72746	0.73202	0.74035	0.71188	0.72703	0.72673	0.73084	0.72066	0.71811	0.73589	0.7102	0.73126	0.7444	0.74822	0.71662	0.76216	0.7219	0.71921	0.7175	0.71805	0.7432	0.73228	0.76963	0.73295	0.68602	0.71326	0.70167	0.71923	0.68177	0.71338	0.72142	0.71407	0.6866	0.68064	0.68788	0.75863	0.72107	0.71367	0.72348	0.74302	0.70265	0.70928	0.71787
GDSC_kmrc1	0.69956	0.77754	0.74177	0.72982	0.77831	0.77726	0.77922	0.81615	0.82894	0.79509	0.78364	0.7856	0.77699	0.79489	0.75308	0.77959	0.75729	0.73843	0.77543	0.71194	0.82248	0.71555	0.78964	0.73693	0.81378	0.74382	0.68214	0.77187	0.71002	0.73907	0.74604	0.73316	0.78984	0.78892	0.71435	0.76425	0.8082	0.78886	0.75753	0.75262	0.76561	0.68464	0.75959	0.73439	0.78501	0.7002	0.75309	0.74739	0.76431
GDSC_kmrc20	0.7255	0.78951	0.76275	0.75709	0.7795	0.79854	0.7957	0.8297	0.83281	0.79477	0.79571	0.78935	0.7858	0.79785	0.76918	0.78954	0.77057	0.75679	0.78852	0.7393	0.82374	0.74528	0.80237	0.75743	0.82033	0.76557	0.71112	0.78149	0.73639	0.76441	0.75831	0.76207	0.7788	0.795	0.73208	0.78035	0.81121	0.79253	0.76229	0.76113	0.77019	0.71709	0.78144	0.75919	0.79203	0.72701	0.77176	0.77156	0.77354
GDSC_kms11	0.75804	0.74223	0.74401	0.75851	0.73926	0.7728	0.7587	0.75908	0.75991	0.73959	0.75221	0.75336	0.74986	0.74771	0.74043	0.76058	0.73871	0.75583	0.76177	0.78602	0.74451	0.79473	0.75054	0.74361	0.74877	0.74299	0.75407	0.74856	0.80276	0.7499	0.71453	0.7376	0.72428	0.74682	0.72372	0.74035	0.74799	0.74616	0.71232	0.71155	0.72262	0.77383	0.74361	0.75008	0.74908	0.76116	0.72364	0.74282	0.74565
GDSC_kms12bm	0.74594	0.72356	0.72138	0.73132	0.70651	0.75908	0.73182	0.7219	0.73344	0.7019	0.71686	0.70744	0.71442	0.70762	0.72171	0.72727	0.70282	0.72921	0.73841	0.77218	0.70747	0.78596	0.72218	0.71775	0.7081	0.72621	0.75929	0.71591	0.79837	0.74083	0.69457	0.72808	0.68967	0.70364	0.68417	0.71705	0.70971	0.70467	0.68102	0.6833	0.68213	0.77916	0.73074	0.72405	0.72763	0.76337	0.7083	0.72286	0.69709
GDSC_kns42	0.70872	0.74576	0.71852	0.74787	0.76209	0.77915	0.75508	0.75946	0.76481	0.75523	0.76302	0.76954	0.76619	0.78007	0.75143	0.76858	0.73793	0.75239	0.77456	0.71995	0.756	0.72107	0.75708	0.75021	0.76328	0.72888	0.69211	0.75938	0.71664	0.75299	0.70564	0.71673	0.74237	0.78196	0.70747	0.73941	0.754	0.74493	0.70733	0.69389	0.723	0.70186	0.73789	0.73154	0.76569	0.69496	0.71475	0.72587	0.76107
GDSC_kns62	0.71319	0.80984	0.78242	0.76715	0.75983	0.79109	0.80387	0.78245	0.78673	0.77144	0.78621	0.76687	0.76947	0.76544	0.75399	0.77946	0.82504	0.75036	0.78358	0.7341	0.77899	0.73526	0.78972	0.74523	0.78383	0.77627	0.69365	0.7676	0.72727	0.74786	0.77078	0.77398	0.75942	0.77003	0.73373	0.82917	0.77583	0.7801	0.80589	0.79805	0.80902	0.70956	0.78972	0.77007	0.77294	0.71225	0.81709	0.78246	0.75675
GDSC_kp2	0.67677	0.7729	0.76377	0.73007	0.71804	0.74643	0.78386	0.74943	0.74973	0.73211	0.74623	0.74245	0.72948	0.73833	0.71651	0.73414	0.75922	0.7071	0.74093	0.69862	0.75423	0.70853	0.7457	0.70158	0.74561	0.75983	0.67408	0.7197	0.69269	0.71439	0.77464	0.75841	0.74803	0.73356	0.71183	0.78936	0.73828	0.75253	0.77581	0.77625	0.77258	0.67119	0.77955	0.75224	0.73084	0.68104	0.78581	0.75232	0.72316
GDSC_kp3	0.72559	0.797	0.79878	0.78202	0.76412	0.80041	0.80724	0.80979	0.80721	0.77622	0.79773	0.7819	0.77698	0.78184	0.76839	0.7871	0.78494	0.76267	0.79187	0.74758	0.80047	0.74787	0.80822	0.75201	0.80391	0.78721	0.71403	0.77815	0.7416	0.76631	0.80721	0.77356	0.76842	0.77656	0.74926	0.79627	0.78028	0.79594	0.77478	0.7685	0.78062	0.72386	0.79411	0.77395	0.78848	0.72844	0.78895	0.7917	0.76467
GDSC_kp4	0.73793	0.779	0.76284	0.77393	0.77299	0.81438	0.78831	0.78814	0.78641	0.77896	0.79063	0.77839	0.7709	0.7893	0.78963	0.78667	0.77221	0.79151	0.79044	0.75172	0.77984	0.74868	0.79535	0.76787	0.78913	0.76438	0.72465	0.776	0.74891	0.78998	0.75467	0.75334	0.77167	0.78743	0.73757	0.78111	0.77824	0.77515	0.75053	0.74721	0.75902	0.73131	0.77758	0.7694	0.79035	0.73182	0.75327	0.76737	0.77114
GDSC_kpnyn	0.72027	0.70032	0.67573	0.72999	0.72172	0.74436	0.70794	0.71169	0.71368	0.7118	0.72332	0.71345	0.70628	0.72617	0.71894	0.72924	0.6924	0.74354	0.73242	0.69974	0.68803	0.69442	0.71078	0.73636	0.70112	0.68496	0.69962	0.72045	0.70074	0.72818	0.64411	0.67525	0.68774	0.7334	0.69351	0.69251	0.70554	0.6919	0.6529	0.63756	0.66655	0.7024	0.69267	0.71391	0.72405	0.68953	0.65667	0.69205	0.71381
GDSC_ku1919	0.70367	0.79623	0.76564	0.75533	0.76092	0.7862	0.79844	0.77538	0.77889	0.78085	0.78612	0.77681	0.76846	0.76517	0.74794	0.77344	0.78813	0.74394	0.78083	0.72886	0.77017	0.72877	0.77656	0.73996	0.77612	0.76127	0.68914	0.77226	0.72245	0.73737	0.75666	0.75191	0.77405	0.76561	0.72876	0.80432	0.77332	0.77931	0.77997	0.77588	0.78762	0.69906	0.77467	0.75036	0.76391	0.70173	0.78477	0.76491	0.7587
GDSC_ku812	0.74512	0.7254	0.72897	0.73114	0.72349	0.7523	0.73869	0.73832	0.738	0.72349	0.74007	0.73573	0.72452	0.72133	0.72255	0.74046	0.7164	0.73043	0.73817	0.74505	0.71551	0.75689	0.72826	0.72635	0.72126	0.72979	0.75498	0.73088	0.75466	0.72531	0.7029	0.71568	0.71235	0.72292	0.68638	0.7322	0.72858	0.72975	0.70152	0.69739	0.7054	0.75284	0.72435	0.72449	0.72964	0.75328	0.72144	0.7243	0.7218
GDSC_kuramochi	0.72296	0.77328	0.75052	0.75544	0.77221	0.79086	0.78114	0.78211	0.78654	0.7732	0.78034	0.77874	0.77025	0.77693	0.75645	0.78453	0.76819	0.77082	0.78483	0.73264	0.77785	0.73123	0.77398	0.76316	0.77421	0.76578	0.70309	0.75789	0.72588	0.76526	0.73938	0.75667	0.75782	0.77444	0.71845	0.772	0.77273	0.76266	0.74605	0.74055	0.76345	0.70989	0.77675	0.76011	0.78663	0.71411	0.76112	0.77205	0.76309
GDSC_kym1	0.67283	0.68979	0.69193	0.70447	0.70288	0.73883	0.70769	0.70477	0.70772	0.6982	0.70844	0.70884	0.69485	0.71166	0.73597	0.71142	0.6846	0.73768	0.7132	0.68784	0.70065	0.69145	0.707	0.70803	0.70663	0.69338	0.6705	0.69783	0.68916	0.72275	0.684	0.68446	0.71603	0.7097	0.67483	0.69815	0.70733	0.70811	0.67575	0.67092	0.67955	0.66863	0.69605	0.69689	0.71526	0.68104	0.67289	0.69256	0.70162
GDSC_kyse140	0.71258	0.77767	0.76068	0.76101	0.74755	0.77572	0.77848	0.76101	0.76152	0.75269	0.76678	0.75359	0.75171	0.75677	0.7445	0.76805	0.80687	0.74651	0.77066	0.72763	0.75657	0.72676	0.76509	0.74645	0.75999	0.76155	0.69223	0.74936	0.72153	0.74931	0.73596	0.75017	0.7355	0.75997	0.72277	0.79879	0.76001	0.74825	0.77156	0.76598	0.78311	0.70199	0.77368	0.7661	0.76171	0.70226	0.77159	0.76362	0.7508
GDSC_kyse150	0.7234	0.79532	0.78943	0.76599	0.7616	0.79389	0.80953	0.78516	0.78722	0.76821	0.7886	0.77229	0.76585	0.77091	0.76005	0.77508	0.80022	0.75423	0.78137	0.7484	0.77766	0.75304	0.78217	0.73854	0.78208	0.7857	0.71615	0.77513	0.74889	0.76054	0.76465	0.77616	0.76531	0.76922	0.72897	0.80553	0.77527	0.77473	0.79151	0.79395	0.79171	0.72799	0.79705	0.7756	0.77071	0.72973	0.78995	0.7784	0.75809
GDSC_kyse180	0.70029	0.77705	0.76452	0.75335	0.74264	0.77581	0.78216	0.75876	0.75875	0.74583	0.75854	0.7519	0.74488	0.7521	0.74637	0.7598	0.8028	0.74484	0.76801	0.73228	0.75876	0.73135	0.76988	0.7414	0.7539	0.76406	0.69159	0.74494	0.72372	0.747	0.74528	0.76304	0.7415	0.74888	0.72293	0.80378	0.75689	0.74624	0.77294	0.7815	0.78615	0.69439	0.77816	0.75914	0.75412	0.7049	0.78579	0.76442	0.73714
GDSC_kyse410	0.7201	0.81289	0.79172	0.77607	0.76579	0.79432	0.81538	0.78812	0.78929	0.77435	0.79165	0.77288	0.76816	0.7715	0.75603	0.78113	0.80921	0.75391	0.78792	0.74362	0.77684	0.74748	0.79257	0.74614	0.77974	0.79324	0.71258	0.7737	0.73686	0.75465	0.77656	0.78726	0.75868	0.77459	0.7383	0.81708	0.7734	0.77844	0.79507	0.78341	0.79984	0.72175	0.80536	0.78864	0.77326	0.71756	0.81291	0.78889	0.75963
GDSC_kyse450	0.71541	0.79893	0.77289	0.7734	0.75652	0.79394	0.79882	0.77425	0.77717	0.76176	0.77195	0.76053	0.75971	0.76788	0.75704	0.77567	0.80844	0.75935	0.78457	0.74	0.77496	0.73817	0.78101	0.75073	0.76887	0.76876	0.6998	0.75604	0.73505	0.76674	0.75096	0.76917	0.75236	0.76656	0.73476	0.8128	0.76292	0.7587	0.77604	0.77994	0.79352	0.71008	0.78785	0.77858	0.77347	0.70962	0.78894	0.77904	0.7519
GDSC_kyse510	0.71728	0.79818	0.79509	0.76447	0.75641	0.78518	0.80918	0.78472	0.7825	0.76273	0.78202	0.76876	0.7605	0.76691	0.75219	0.77162	0.81799	0.75065	0.77334	0.73556	0.78027	0.74019	0.78778	0.74069	0.77988	0.785	0.70491	0.76038	0.73427	0.75043	0.77621	0.78743	0.75952	0.76996	0.73311	0.82606	0.77653	0.78142	0.80138	0.80879	0.8135	0.71653	0.8026	0.78417	0.77043	0.72021	0.8062	0.78239	0.75652
GDSC_kyse520	0.72122	0.82721	0.78518	0.77328	0.78347	0.81502	0.81998	0.7972	0.80477	0.79508	0.8137	0.77813	0.78327	0.795	0.76828	0.79257	0.83432	0.76594	0.80122	0.74435	0.79436	0.74366	0.80948	0.7571	0.79705	0.78752	0.70758	0.79316	0.73858	0.76689	0.77468	0.77868	0.77179	0.78931	0.7357	0.82851	0.79724	0.78037	0.81529	0.80816	0.81929	0.72059	0.80315	0.77496	0.79886	0.71987	0.82258	0.79341	0.76861
GDSC_kyse70	0.71642	0.77234	0.76736	0.75936	0.75072	0.77989	0.77672	0.77115	0.76862	0.75434	0.77093	0.75012	0.75935	0.77114	0.74975	0.7686	0.7911	0.75273	0.77419	0.73112	0.76789	0.7338	0.77651	0.74708	0.7622	0.75915	0.6993	0.75774	0.7344	0.75947	0.73969	0.75028	0.74382	0.76502	0.72832	0.78664	0.76449	0.75168	0.75863	0.76254	0.77015	0.7132	0.77294	0.76493	0.76667	0.71199	0.76361	0.76124	0.75749
GDSC_l1236	0.73447	0.71077	0.71923	0.72278	0.71616	0.75083	0.73108	0.72914	0.73419	0.71146	0.72349	0.7287	0.7243	0.71937	0.72069	0.73162	0.70932	0.72662	0.73329	0.74815	0.71744	0.76151	0.7217	0.71274	0.71806	0.7188	0.74393	0.7181	0.76907	0.73082	0.69166	0.71009	0.70839	0.71742	0.68626	0.71561	0.72276	0.72171	0.69491	0.69336	0.69469	0.75421	0.72356	0.7173	0.72095	0.74344	0.6995	0.70819	0.71806
GDSC_l363	0.76022	0.73477	0.74137	0.75351	0.73221	0.77462	0.74621	0.7516	0.7534	0.72498	0.74158	0.73697	0.74423	0.73826	0.7409	0.75446	0.7269	0.75609	0.76163	0.79517	0.73281	0.8032	0.74269	0.73617	0.73415	0.74051	0.76151	0.74311	0.82091	0.75828	0.70682	0.73854	0.71246	0.73265	0.71226	0.72988	0.73327	0.72819	0.70265	0.69964	0.70574	0.7862	0.74322	0.74143	0.74862	0.76841	0.71731	0.73818	0.73127
GDSC_l428	0.74227	0.72898	0.72504	0.73112	0.72935	0.76203	0.74099	0.74583	0.74878	0.72553	0.74232	0.7351	0.73518	0.72727	0.7303	0.74187	0.72516	0.73793	0.74577	0.75636	0.72349	0.7676	0.73548	0.72294	0.7302	0.73012	0.74951	0.74127	0.77474	0.73308	0.69458	0.7191	0.70526	0.72743	0.68656	0.72488	0.73033	0.72342	0.70014	0.69587	0.69896	0.7631	0.73091	0.72497	0.73295	0.74565	0.71423	0.71995	0.72833
GDSC_l540	0.74967	0.7335	0.73515	0.73121	0.73887	0.76561	0.74717	0.74642	0.75238	0.72742	0.74344	0.74073	0.73949	0.73325	0.73036	0.74546	0.73028	0.73893	0.75088	0.76812	0.72891	0.77952	0.73672	0.72416	0.73289	0.73596	0.75725	0.74324	0.7865	0.73751	0.70691	0.72624	0.70982	0.73435	0.6914	0.73151	0.73972	0.73118	0.70482	0.70509	0.71106	0.76711	0.73407	0.72612	0.73939	0.76224	0.71652	0.72925	0.73122
GDSC_lama84	0.75008	0.73167	0.73455	0.73635	0.72818	0.76439	0.74363	0.74269	0.74345	0.72478	0.74002	0.73769	0.72787	0.72335	0.73399	0.74559	0.72531	0.74527	0.75171	0.75211	0.72286	0.76599	0.73487	0.73389	0.72658	0.73789	0.76261	0.73488	0.7653	0.7386	0.7144	0.72325	0.71845	0.72372	0.68808	0.74211	0.73414	0.73556	0.70749	0.70637	0.71258	0.757	0.73335	0.73018	0.73528	0.76596	0.72635	0.73448	0.72301
GDSC_lc1f	0.72062	0.77142	0.77591	0.76888	0.74145	0.7804	0.77852	0.77198	0.76863	0.75144	0.76141	0.74816	0.75976	0.75894	0.7485	0.77081	0.78043	0.75441	0.77795	0.74808	0.77083	0.74114	0.77816	0.74971	0.75693	0.7645	0.70959	0.74972	0.74427	0.762	0.7421	0.77563	0.7397	0.75908	0.74422	0.78782	0.75941	0.75267	0.75492	0.76268	0.76555	0.71747	0.79007	0.77603	0.76423	0.72195	0.76792	0.76341	0.75184
GDSC_lclc103h	0.72523	0.8107	0.75746	0.76062	0.79249	0.81163	0.81261	0.80015	0.82233	0.81058	0.81288	0.80818	0.79793	0.80892	0.76972	0.79768	0.78072	0.75849	0.80657	0.74547	0.80358	0.74906	0.80226	0.75391	0.80078	0.76902	0.71134	0.80328	0.74093	0.76688	0.75443	0.76182	0.79768	0.79931	0.72329	0.78821	0.80872	0.79674	0.77535	0.76347	0.7795	0.71662	0.78502	0.75651	0.79922	0.72064	0.78009	0.77032	0.77363
GDSC_lclc97tm1	0.73979	0.82158	0.80032	0.78579	0.76861	0.81188	0.8299	0.80704	0.81165	0.78682	0.80378	0.7844	0.77927	0.78286	0.77092	0.79433	0.80194	0.76677	0.79626	0.75835	0.79553	0.76124	0.80469	0.75667	0.80439	0.8004	0.72864	0.78184	0.75537	0.77189	0.79217	0.7956	0.77481	0.78015	0.74728	0.82946	0.79166	0.80527	0.79668	0.80063	0.7987	0.73874	0.80963	0.79114	0.78587	0.74409	0.81457	0.79794	0.76914
GDSC_lk2	0.7099	0.76501	0.75561	0.77008	0.73773	0.76815	0.77494	0.75779	0.75506	0.74306	0.75124	0.75532	0.74764	0.74794	0.72871	0.76503	0.76231	0.74434	0.76369	0.72592	0.74836	0.72442	0.75674	0.74241	0.75435	0.75085	0.69276	0.74016	0.72151	0.74072	0.727	0.74306	0.73496	0.74724	0.74292	0.76863	0.74615	0.75118	0.72913	0.72826	0.75024	0.70629	0.75193	0.76692	0.74867	0.70294	0.7377	0.7614	0.74658
GDSC_ln18	0.74101	0.79839	0.75811	0.76939	0.81686	0.81783	0.80067	0.79259	0.81282	0.81003	0.81453	0.81569	0.7977	0.81454	0.78532	0.80624	0.77513	0.77874	0.81705	0.75462	0.79806	0.75894	0.7994	0.77208	0.79602	0.76399	0.73095	0.8117	0.74775	0.78484	0.74683	0.76045	0.79755	0.81917	0.72969	0.78121	0.8074	0.79278	0.76918	0.7444	0.76806	0.73053	0.78086	0.75691	0.80813	0.73964	0.77344	0.76862	0.78246
GDSC_ln229	0.74076	0.79028	0.74942	0.76573	0.81271	0.80828	0.78939	0.79346	0.80406	0.80903	0.8102	0.80545	0.83342	0.81149	0.7834	0.83659	0.77356	0.77242	0.84449	0.74179	0.79075	0.74261	0.79091	0.77236	0.78969	0.75866	0.71794	0.80976	0.73915	0.77839	0.73744	0.74798	0.78026	0.82408	0.72486	0.77148	0.79752	0.77741	0.75053	0.73281	0.75897	0.72313	0.77117	0.75677	0.80681	0.72424	0.75548	0.75982	0.82458
GDSC_lncapclonefgc	0.72096	0.74777	0.76866	0.81083	0.73094	0.76951	0.76419	0.75546	0.75447	0.72755	0.74342	0.73242	0.73273	0.73881	0.74184	0.74999	0.73789	0.75174	0.75526	0.74485	0.74008	0.7398	0.75232	0.73662	0.74004	0.761	0.71311	0.73766	0.73382	0.76031	0.72023	0.76932	0.71219	0.73651	0.73194	0.74965	0.72815	0.73204	0.71206	0.71308	0.72487	0.72332	0.7689	0.78824	0.74521	0.71547	0.73285	0.7588	0.73425
GDSC_lounh91	0.72879	0.80228	0.76005	0.76137	0.79805	0.81501	0.80703	0.80126	0.81889	0.80338	0.81998	0.78376	0.78707	0.81207	0.77703	0.79557	0.78381	0.76446	0.79675	0.74331	0.80507	0.7398	0.80265	0.7567	0.79559	0.76852	0.71123	0.78949	0.73533	0.77803	0.75227	0.76158	0.78413	0.80773	0.72104	0.78405	0.80573	0.78146	0.76854	0.76028	0.77412	0.71938	0.78908	0.76423	0.81431	0.72219	0.7716	0.76868	0.77567
GDSC_lovo	0.65487	0.72082	0.74283	0.70179	0.6774	0.71742	0.72341	0.71301	0.71577	0.68505	0.69664	0.67872	0.68476	0.68961	0.67866	0.6966	0.7112	0.67668	0.70388	0.67217	0.70751	0.67738	0.71252	0.66866	0.69953	0.72903	0.64415	0.68154	0.67633	0.68827	0.73537	0.71901	0.68207	0.68307	0.67906	0.73095	0.70105	0.70303	0.69835	0.7169	0.70562	0.6519	0.72126	0.70603	0.69629	0.67559	0.72663	0.73181	0.67972
GDSC_loximvi	0.7154	0.78035	0.73714	0.73454	0.78684	0.79585	0.7758	0.77996	0.78914	0.80245	0.79912	0.7824	0.78344	0.78538	0.75867	0.79316	0.75506	0.75527	0.79393	0.73034	0.7751	0.73457	0.77034	0.74878	0.77259	0.73275	0.70315	0.80111	0.73099	0.74863	0.7323	0.72433	0.79176	0.78474	0.70451	0.76438	0.78998	0.78213	0.75246	0.74079	0.74885	0.7089	0.74394	0.72438	0.78337	0.71989	0.74946	0.73623	0.77294
GDSC_lp1	0.7654	0.73252	0.73542	0.75375	0.73745	0.7701	0.74925	0.75285	0.75183	0.73652	0.74696	0.74944	0.74204	0.73925	0.73993	0.75114	0.72803	0.75488	0.75891	0.79091	0.73504	0.79752	0.74086	0.74101	0.73742	0.73521	0.76013	0.74669	0.81209	0.7508	0.70741	0.7324	0.72577	0.74161	0.71161	0.73247	0.74205	0.73894	0.70581	0.7006	0.71331	0.78067	0.73953	0.7473	0.7451	0.76657	0.71518	0.73717	0.73888
GDSC_ls1034	0.70642	0.77044	0.80713	0.75759	0.72296	0.76105	0.77779	0.76514	0.75921	0.73201	0.74807	0.7371	0.73638	0.73327	0.72325	0.745	0.75478	0.72242	0.75023	0.72398	0.74821	0.73598	0.75925	0.71629	0.75164	0.79538	0.70469	0.7366	0.72573	0.7286	0.79818	0.76489	0.72629	0.73294	0.74204	0.78265	0.73581	0.75832	0.75385	0.75658	0.75153	0.71004	0.77118	0.76383	0.73191	0.71091	0.7788	0.79841	0.72874
GDSC_ls123	0.70919	0.80236	0.78148	0.75335	0.74874	0.78007	0.81648	0.77202	0.77485	0.75878	0.77964	0.7619	0.75412	0.76668	0.74428	0.7601	0.78415	0.73515	0.76859	0.71904	0.76649	0.7298	0.77415	0.72988	0.77162	0.79541	0.69993	0.75383	0.71999	0.74214	0.78423	0.76962	0.7522	0.75867	0.71837	0.80164	0.75902	0.76633	0.7832	0.78405	0.79048	0.69982	0.7971	0.77214	0.75938	0.70905	0.8006	0.78889	0.7448
GDSC_ls180	0.70876	0.77269	0.8195	0.77691	0.72981	0.76937	0.77887	0.76648	0.76177	0.73823	0.75573	0.74075	0.73726	0.73727	0.73009	0.7507	0.76375	0.72856	0.75646	0.72851	0.75354	0.73401	0.76253	0.72513	0.75363	0.79898	0.70156	0.73848	0.72669	0.7436	0.79954	0.77431	0.73375	0.74145	0.7479	0.78673	0.74057	0.76259	0.75027	0.76071	0.75871	0.70807	0.7778	0.78182	0.74386	0.71293	0.78021	0.79037	0.7335
GDSC_ls411n	0.70925	0.77177	0.82373	0.77509	0.72621	0.77178	0.7802	0.76868	0.7632	0.73187	0.75182	0.73863	0.73947	0.73541	0.73453	0.75433	0.77171	0.73268	0.75544	0.72704	0.75696	0.73493	0.76868	0.72512	0.75857	0.80182	0.6986	0.7352	0.73148	0.74404	0.80472	0.77554	0.72401	0.73799	0.75131	0.78784	0.7438	0.76353	0.75068	0.76242	0.76159	0.71118	0.7778	0.78001	0.7423	0.71287	0.77798	0.80161	0.73351
GDSC_ls513	0.69602	0.76631	0.8103	0.75267	0.70848	0.74788	0.77091	0.75559	0.75037	0.71867	0.73611	0.72133	0.72455	0.72299	0.71168	0.73415	0.75347	0.7088	0.73909	0.71853	0.74168	0.72466	0.75161	0.70015	0.74187	0.79805	0.69214	0.72096	0.718	0.7192	0.80442	0.76744	0.70871	0.71824	0.73465	0.77692	0.72203	0.74637	0.7454	0.75964	0.75052	0.70375	0.76643	0.76179	0.72617	0.70118	0.77947	0.78813	0.71806
GDSC_lu65	0.70356	0.77367	0.77447	0.74462	0.73725	0.77335	0.77339	0.77334	0.77019	0.75567	0.7656	0.74849	0.75388	0.74643	0.73239	0.76632	0.75608	0.73198	0.76715	0.72545	0.76059	0.73266	0.77387	0.72411	0.75877	0.7599	0.69674	0.74931	0.72811	0.73829	0.77014	0.75006	0.75352	0.74816	0.71631	0.78368	0.7589	0.77545	0.74607	0.75632	0.75256	0.70986	0.76115	0.74598	0.75839	0.71148	0.76921	0.76057	0.73787
GDSC_lxf289	0.7146	0.79762	0.75994	0.74758	0.78771	0.79608	0.79592	0.80236	0.81275	0.7982	0.80493	0.79215	0.77629	0.80065	0.75875	0.78995	0.78389	0.74915	0.78678	0.72141	0.80646	0.72566	0.81335	0.75208	0.80381	0.76081	0.69615	0.78469	0.71815	0.75057	0.76444	0.74372	0.78649	0.79737	0.72305	0.78607	0.80877	0.80299	0.77148	0.76245	0.78659	0.7014	0.77339	0.74916	0.79973	0.71008	0.77493	0.76184	0.76453
GDSC_mc116	0.76335	0.69814	0.70577	0.71188	0.70212	0.73415	0.71386	0.71352	0.72045	0.69653	0.70893	0.70856	0.7015	0.70054	0.70371	0.71512	0.69131	0.71439	0.71777	0.74438	0.69008	0.75788	0.70014	0.70625	0.69886	0.7062	0.76429	0.71012	0.78351	0.71462	0.67211	0.69585	0.68311	0.70008	0.66835	0.70154	0.71224	0.698	0.67609	0.67158	0.67326	0.81317	0.70449	0.70632	0.7061	0.77671	0.68229	0.69794	0.70168
GDSC_mcf7	0.72473	0.75801	0.77965	0.79059	0.73804	0.77866	0.77832	0.76589	0.75801	0.73619	0.75253	0.74467	0.73826	0.74806	0.75132	0.75508	0.76113	0.75391	0.76178	0.74359	0.75271	0.74343	0.76465	0.74491	0.75578	0.76969	0.7182	0.73795	0.74186	0.75857	0.74471	0.78391	0.72953	0.74747	0.7392	0.77618	0.74494	0.75118	0.73681	0.74267	0.75653	0.72655	0.78909	0.81433	0.75481	0.72748	0.7527	0.76988	0.74042
GDSC_mdamb157	0.71256	0.76787	0.75047	0.75984	0.74999	0.77754	0.77139	0.76158	0.76161	0.74702	0.75503	0.75856	0.7565	0.76043	0.76479	0.77065	0.76505	0.75491	0.77921	0.73184	0.75849	0.72857	0.76048	0.74409	0.74799	0.7479	0.7015	0.73862	0.72396	0.75938	0.72943	0.76429	0.74119	0.75995	0.71509	0.76788	0.74974	0.74608	0.73866	0.74205	0.76053	0.70291	0.77484	0.76911	0.77386	0.70945	0.74915	0.75386	0.75105
GDSC_mdamb231	0.7379	0.81433	0.7702	0.76699	0.80009	0.81922	0.81496	0.804	0.82025	0.82248	0.83146	0.80737	0.79614	0.80811	0.77349	0.80455	0.78706	0.76744	0.80665	0.74995	0.79741	0.75114	0.80608	0.76182	0.80816	0.77673	0.72408	0.81376	0.74838	0.76668	0.76726	0.75801	0.79821	0.8047	0.7255	0.80083	0.81509	0.80616	0.78323	0.7657	0.78225	0.72907	0.78601	0.76533	0.80115	0.73642	0.79087	0.7796	0.78425
GDSC_mdamb361	0.72088	0.76739	0.77623	0.78889	0.73719	0.7774	0.783	0.76282	0.76101	0.7368	0.74864	0.74266	0.73817	0.74857	0.74831	0.7542	0.75697	0.7487	0.7606	0.73641	0.75088	0.73535	0.76367	0.74454	0.75255	0.77205	0.71217	0.73211	0.72696	0.76251	0.74162	0.79785	0.71953	0.74714	0.74207	0.77363	0.73557	0.73465	0.73076	0.73622	0.7498	0.71485	0.79778	0.83543	0.7558	0.71198	0.7609	0.77592	0.73684
GDSC_mdamb415	0.69533	0.75611	0.78659	0.77454	0.72771	0.75671	0.77513	0.75679	0.7561	0.73253	0.74989	0.74041	0.73441	0.73663	0.7315	0.74363	0.75911	0.7244	0.74801	0.72266	0.74728	0.72611	0.75626	0.72434	0.74618	0.76527	0.68856	0.73128	0.71004	0.73708	0.75406	0.80398	0.72329	0.74079	0.73405	0.77311	0.74237	0.74852	0.74949	0.7566	0.76227	0.69517	0.78878	0.80768	0.74542	0.69813	0.77135	0.76707	0.73284
GDSC_mdamb453	0.70516	0.73684	0.77252	0.77546	0.72446	0.75769	0.75872	0.74141	0.73884	0.71911	0.73262	0.72923	0.71705	0.72293	0.72944	0.73074	0.73551	0.73088	0.73668	0.72923	0.73045	0.73036	0.73292	0.72162	0.72678	0.75741	0.70597	0.71769	0.72078	0.7408	0.73048	0.78654	0.7148	0.7296	0.72259	0.75209	0.71991	0.72744	0.71895	0.72703	0.72901	0.71001	0.77747	0.81272	0.7363	0.70715	0.73685	0.75073	0.72225
GDSC_mdamb468	0.71666	0.79255	0.78703	0.76245	0.74901	0.77984	0.81091	0.7743	0.77611	0.75292	0.77317	0.76026	0.75312	0.7583	0.74437	0.76087	0.78658	0.73925	0.76638	0.73279	0.76374	0.73421	0.77312	0.73315	0.76173	0.78229	0.70718	0.74674	0.72421	0.74958	0.76363	0.80478	0.73932	0.75923	0.72397	0.80632	0.7582	0.76305	0.78056	0.78504	0.78891	0.71301	0.82333	0.78988	0.76948	0.71466	0.79086	0.77488	0.74474
GDSC_mdst8	0.71876	0.78246	0.73002	0.73726	0.79985	0.79141	0.76807	0.78158	0.78974	0.80685	0.79372	0.78997	0.79895	0.7988	0.76487	0.79738	0.7503	0.7596	0.80227	0.723	0.78312	0.72676	0.77196	0.75697	0.78034	0.73971	0.69987	0.79881	0.72323	0.75678	0.73199	0.72221	0.79098	0.80454	0.70557	0.75739	0.78753	0.77424	0.74402	0.72844	0.74765	0.70119	0.74782	0.73536	0.78873	0.71107	0.74167	0.7429	0.78855
GDSC_me1	0.74844	0.70178	0.69849	0.70033	0.70153	0.7325	0.70748	0.71045	0.71499	0.69306	0.70635	0.6958	0.6954	0.69534	0.70364	0.71618	0.68637	0.71182	0.72082	0.72504	0.68962	0.73627	0.69924	0.70743	0.69161	0.70224	0.75942	0.70392	0.74716	0.71242	0.68127	0.69451	0.68486	0.69616	0.65577	0.70087	0.70405	0.69663	0.67414	0.6665	0.67078	0.74909	0.70095	0.70294	0.70941	0.76832	0.68776	0.69774	0.69187
GDSC_mec1	0.76011	0.71879	0.71535	0.71432	0.71363	0.74588	0.72926	0.72951	0.73852	0.70985	0.7205	0.73028	0.72273	0.71315	0.71539	0.73324	0.70711	0.72149	0.73252	0.75647	0.71196	0.7736	0.71691	0.7095	0.71662	0.71468	0.76529	0.7194	0.79143	0.721	0.69298	0.70674	0.70553	0.71204	0.67973	0.72223	0.72367	0.72086	0.69992	0.69741	0.69263	0.79683	0.71597	0.71369	0.71703	0.7743	0.70955	0.70941	0.71757
GDSC_melho	0.7326	0.76648	0.74841	0.75681	0.77168	0.79125	0.77382	0.77937	0.78354	0.7717	0.77667	0.78104	0.82157	0.77291	0.76635	0.82627	0.7547	0.76167	0.81031	0.75265	0.77025	0.75076	0.76986	0.75243	0.77327	0.7528	0.71765	0.77258	0.74847	0.76722	0.72889	0.74959	0.75226	0.77014	0.72269	0.76026	0.77241	0.7596	0.7309	0.7291	0.7394	0.73179	0.76058	0.75333	0.77199	0.7325	0.74552	0.75696	0.82056
GDSC_meljuso	0.71576	0.76748	0.74877	0.74756	0.77533	0.78619	0.76936	0.77897	0.78158	0.77811	0.78684	0.77841	0.81315	0.78366	0.75929	0.81584	0.75852	0.75176	0.81518	0.73507	0.77256	0.73345	0.77216	0.74754	0.77054	0.74209	0.70014	0.78075	0.73636	0.75854	0.72981	0.73378	0.76577	0.7833	0.71885	0.75858	0.77995	0.76634	0.73433	0.73391	0.74659	0.71402	0.75185	0.745	0.77701	0.71359	0.73546	0.74437	0.81693
GDSC_messa	0.74967	0.75271	0.76203	0.76681	0.76848	0.79833	0.76966	0.77969	0.77458	0.75573	0.76977	0.76965	0.76475	0.77863	0.78929	0.78003	0.75257	0.80701	0.78527	0.75329	0.77341	0.75979	0.78007	0.76515	0.76618	0.76098	0.74088	0.76632	0.75914	0.80628	0.73696	0.75567	0.75258	0.76742	0.72219	0.75911	0.77127	0.75956	0.73159	0.73325	0.74061	0.74055	0.77043	0.76253	0.77651	0.74767	0.73989	0.7603	0.76387
GDSC_mewo	0.73678	0.77142	0.75936	0.76655	0.77623	0.79274	0.77855	0.7828	0.78692	0.77963	0.78572	0.7823	0.8093	0.78311	0.77216	0.82408	0.76344	0.76726	0.80722	0.75034	0.77486	0.74597	0.77704	0.76104	0.77627	0.75466	0.7205	0.77886	0.74429	0.77137	0.73388	0.74901	0.76289	0.78425	0.72646	0.7636	0.78182	0.76626	0.73999	0.73524	0.75297	0.72822	0.76267	0.76401	0.7793	0.73272	0.74704	0.75794	0.8164
GDSC_mfe296	0.73964	0.76821	0.75282	0.7783	0.77417	0.81042	0.77921	0.77199	0.7774	0.76547	0.77606	0.77938	0.76982	0.77903	0.79251	0.78298	0.76602	0.8014	0.78936	0.75387	0.76241	0.74993	0.7792	0.77155	0.77133	0.76411	0.72919	0.76446	0.74457	0.80098	0.7293	0.75074	0.75108	0.77836	0.71964	0.76946	0.77166	0.75767	0.7316	0.72858	0.74716	0.73168	0.7696	0.76486	0.78244	0.73145	0.74501	0.76471	0.76356
GDSC_mfe319	0.73622	0.79667	0.78808	0.79672	0.7768	0.8091	0.80864	0.79672	0.79561	0.78349	0.79422	0.7787	0.77625	0.78525	0.76819	0.7906	0.78845	0.78018	0.79293	0.75574	0.78422	0.751	0.79251	0.76868	0.78856	0.79025	0.71863	0.77265	0.74964	0.79389	0.75928	0.78008	0.7669	0.78291	0.75244	0.79703	0.77814	0.77376	0.76428	0.75949	0.7765	0.73271	0.79735	0.79691	0.78977	0.72767	0.77437	0.79221	0.7749
GDSC_mg63	0.71336	0.76016	0.72709	0.73647	0.79321	0.78281	0.76079	0.7711	0.78121	0.78413	0.78818	0.78032	0.76932	0.79704	0.76454	0.78135	0.75684	0.75768	0.78287	0.71596	0.7771	0.71805	0.76993	0.75478	0.76871	0.72936	0.69724	0.77218	0.71239	0.75628	0.72136	0.72255	0.76672	0.80286	0.6922	0.74796	0.78864	0.75871	0.73012	0.72296	0.7542	0.69619	0.7444	0.73211	0.79432	0.70647	0.73157	0.73676	0.76366
GDSC_mhhnb11	0.71567	0.71158	0.68706	0.7386	0.72142	0.75162	0.71363	0.71912	0.72208	0.71702	0.7246	0.72359	0.71769	0.73143	0.72441	0.73973	0.69804	0.74933	0.74301	0.70547	0.70341	0.69547	0.72039	0.74233	0.71408	0.68997	0.69159	0.72223	0.7058	0.73612	0.65751	0.68281	0.69878	0.73565	0.70514	0.70434	0.71261	0.70312	0.66242	0.6462	0.67304	0.69712	0.69591	0.71534	0.73263	0.68869	0.66609	0.70382	0.71858
GDSC_miapaca2	0.69373	0.74053	0.72619	0.72139	0.72563	0.76808	0.74201	0.74819	0.7497	0.73005	0.74169	0.71904	0.73241	0.74715	0.74809	0.74494	0.72514	0.73946	0.75316	0.71052	0.7428	0.70988	0.74964	0.72312	0.74029	0.72676	0.69038	0.73163	0.71235	0.75389	0.7204	0.72497	0.7255	0.7341	0.68012	0.73745	0.7375	0.72652	0.70492	0.71518	0.71282	0.68886	0.74297	0.72094	0.75616	0.70531	0.72612	0.72904	0.71924
GDSC_mkn1	0.71852	0.79918	0.76681	0.7621	0.7808	0.79832	0.79998	0.78606	0.79725	0.78419	0.79818	0.79936	0.78577	0.79666	0.76224	0.78687	0.801	0.75692	0.79995	0.73672	0.78716	0.7431	0.79456	0.75021	0.78801	0.77202	0.7038	0.77724	0.73447	0.75815	0.76955	0.76502	0.77707	0.79017	0.72952	0.79478	0.78669	0.78802	0.77244	0.76119	0.79091	0.71216	0.78846	0.76738	0.78866	0.71198	0.78639	0.77858	0.76852
GDSC_mkn45	0.69977	0.76975	0.79593	0.76144	0.72171	0.7669	0.77031	0.76212	0.75767	0.72843	0.74852	0.73065	0.73313	0.73118	0.73119	0.74513	0.75851	0.73311	0.75715	0.7254	0.74577	0.72329	0.77058	0.72446	0.75139	0.78449	0.69006	0.73142	0.71868	0.7371	0.78265	0.75981	0.71727	0.72857	0.73399	0.78308	0.73254	0.74814	0.73446	0.74319	0.74769	0.7002	0.76964	0.76498	0.74092	0.70056	0.77624	0.7878	0.72267
GDSC_mkn7	0.71153	0.81464	0.78137	0.75654	0.76706	0.7968	0.83074	0.78002	0.78936	0.77781	0.79655	0.78312	0.76806	0.77713	0.75094	0.77213	0.79225	0.74372	0.77839	0.7349	0.77269	0.7409	0.78466	0.73547	0.77747	0.79555	0.70154	0.76727	0.72942	0.74788	0.77768	0.78087	0.77029	0.76968	0.72641	0.80883	0.77401	0.77896	0.79541	0.78619	0.7971	0.70895	0.80675	0.77294	0.77269	0.71095	0.80462	0.79346	0.75578
GDSC_ml1	0.71391	0.77704	0.74105	0.75108	0.78972	0.78764	0.77906	0.78761	0.79677	0.79349	0.79234	0.80158	0.7827	0.79251	0.76948	0.78766	0.76898	0.7629	0.78913	0.72346	0.79559	0.7314	0.7877	0.75656	0.79182	0.74985	0.69633	0.77351	0.71514	0.75765	0.74283	0.74499	0.79068	0.79867	0.72012	0.77116	0.79023	0.78511	0.75083	0.74474	0.76712	0.69734	0.76444	0.74934	0.79051	0.70532	0.75897	0.75324	0.77296
GDSC_mm1s	0.75478	0.73444	0.73331	0.74383	0.7215	0.75851	0.74603	0.74387	0.7466	0.72171	0.73816	0.73487	0.73685	0.73013	0.72345	0.7432	0.72199	0.73358	0.7451	0.7844	0.72615	0.79675	0.73376	0.72651	0.72995	0.73429	0.75664	0.73235	0.81133	0.73466	0.70352	0.73614	0.70376	0.72579	0.71173	0.7288	0.72558	0.72471	0.70033	0.69928	0.70479	0.7815	0.7358	0.73848	0.73198	0.76203	0.71877	0.73496	0.72757
GDSC_molm13	0.73293	0.70821	0.70945	0.70162	0.70253	0.7334	0.71272	0.71931	0.72395	0.69792	0.71002	0.70254	0.70563	0.69949	0.70449	0.71731	0.69999	0.70573	0.72011	0.72817	0.70542	0.74268	0.70749	0.70314	0.69974	0.70532	0.74464	0.703	0.75126	0.71158	0.69225	0.7059	0.68856	0.69919	0.65742	0.70954	0.71233	0.69985	0.68219	0.68744	0.68677	0.7447	0.71329	0.70062	0.71443	0.75772	0.70405	0.70531	0.69467
GDSC_molm16	0.75483	0.72749	0.72358	0.73697	0.73366	0.76634	0.74134	0.7384	0.74158	0.72449	0.74041	0.73285	0.7292	0.72294	0.73791	0.74171	0.71676	0.74889	0.74728	0.75114	0.71769	0.76219	0.73256	0.73752	0.72667	0.73651	0.76225	0.73206	0.75986	0.74624	0.70063	0.71696	0.7087	0.72797	0.68607	0.73024	0.72862	0.72224	0.69466	0.69244	0.70017	0.7608	0.73237	0.73144	0.73608	0.75718	0.718	0.7317	0.72153
GDSC_molp8	0.75031	0.73028	0.73528	0.74769	0.73753	0.76905	0.74565	0.7452	0.74994	0.73033	0.74663	0.75281	0.74463	0.73857	0.73796	0.75319	0.73001	0.75157	0.75941	0.8027	0.72922	0.811	0.73731	0.74176	0.73104	0.73753	0.74831	0.74414	0.80688	0.75179	0.70333	0.73491	0.71877	0.73634	0.71324	0.73318	0.73763	0.73536	0.70686	0.70088	0.71351	0.76571	0.73849	0.73935	0.74285	0.75348	0.71608	0.73173	0.73441
GDSC_molt13	0.77869	0.71181	0.70342	0.7227	0.71809	0.74772	0.72484	0.72342	0.72445	0.70937	0.72398	0.72174	0.70574	0.71314	0.71758	0.72496	0.70157	0.73233	0.73182	0.7458	0.70082	0.75728	0.71102	0.72831	0.70877	0.71137	0.81464	0.7218	0.76523	0.73173	0.67626	0.70127	0.6959	0.71796	0.67393	0.7113	0.71334	0.70632	0.68011	0.66841	0.67844	0.77364	0.71518	0.72247	0.71858	0.7741	0.69163	0.70296	0.70614
GDSC_molt16	0.78114	0.72006	0.7228	0.73074	0.72446	0.75769	0.73406	0.73534	0.73724	0.71802	0.73317	0.7296	0.7207	0.71876	0.72261	0.73432	0.7113	0.73554	0.73968	0.76191	0.71326	0.77412	0.71967	0.72814	0.717	0.7291	0.81429	0.72953	0.78798	0.73931	0.69415	0.71698	0.70115	0.72122	0.68774	0.72321	0.72347	0.71789	0.69302	0.688	0.69026	0.78985	0.72876	0.72951	0.72433	0.78557	0.70663	0.7141	0.71858
GDSC_monomac6	0.75626	0.74082	0.73102	0.73212	0.73831	0.76498	0.74829	0.74749	0.75228	0.73777	0.7499	0.74955	0.74163	0.73221	0.73287	0.75747	0.73228	0.74307	0.75394	0.75629	0.73017	0.7683	0.73897	0.73555	0.73422	0.72994	0.76296	0.73956	0.77147	0.73493	0.70942	0.72343	0.723	0.73578	0.69005	0.74301	0.74532	0.73835	0.71108	0.70935	0.71907	0.76623	0.73202	0.7275	0.74303	0.77127	0.73001	0.73139	0.73301
GDSC_mpp89	0.70936	0.78322	0.73016	0.7461	0.79533	0.79246	0.79238	0.77096	0.7894	0.80634	0.80575	0.79986	0.77524	0.80541	0.76203	0.78611	0.76621	0.75753	0.78654	0.71518	0.77996	0.71862	0.78497	0.75399	0.78091	0.74451	0.68888	0.78283	0.70466	0.74597	0.7228	0.72913	0.7825	0.80029	0.70349	0.76854	0.79263	0.77555	0.74854	0.73237	0.76755	0.6892	0.76108	0.73749	0.79885	0.69416	0.75952	0.75292	0.76668
GDSC_msto211h	0.73984	0.79434	0.75313	0.76433	0.79432	0.81772	0.79812	0.80031	0.81042	0.80617	0.82523	0.7884	0.79376	0.80393	0.77344	0.80643	0.7782	0.77719	0.80538	0.75073	0.78989	0.74883	0.80145	0.7648	0.80369	0.76276	0.72178	0.81949	0.74667	0.76761	0.73986	0.74438	0.7733	0.80005	0.71841	0.78083	0.79881	0.78266	0.75546	0.73933	0.76408	0.73474	0.76612	0.75119	0.80101	0.72942	0.76393	0.76741	0.78428
GDSC_mv411	0.74756	0.7135	0.71926	0.71658	0.71198	0.74474	0.72016	0.72625	0.73126	0.70727	0.71796	0.7129	0.71518	0.71068	0.71767	0.72832	0.70324	0.71996	0.73217	0.73958	0.71232	0.75452	0.71746	0.71516	0.70834	0.71515	0.7603	0.71471	0.7621	0.72538	0.69828	0.71407	0.70336	0.71487	0.6722	0.71493	0.71853	0.71271	0.68795	0.69241	0.6911	0.75747	0.72154	0.71617	0.72311	0.76942	0.70736	0.71075	0.70664
GDSC_nalm6	0.80883	0.71183	0.71415	0.72391	0.72158	0.75126	0.72545	0.72381	0.72964	0.71283	0.72557	0.7245	0.71506	0.71776	0.72131	0.73253	0.70902	0.73506	0.73343	0.74632	0.70402	0.75892	0.71136	0.72773	0.71263	0.72071	0.78214	0.72509	0.77223	0.73546	0.68657	0.70345	0.70058	0.71967	0.67563	0.71416	0.72229	0.70979	0.68977	0.68191	0.68669	0.79262	0.71932	0.72363	0.72011	0.80778	0.69382	0.70697	0.71888
GDSC_namalwa	0.77727	0.71263	0.71836	0.72393	0.71592	0.74962	0.72859	0.72767	0.73274	0.70712	0.72022	0.72779	0.7199	0.71349	0.71886	0.72991	0.70612	0.73325	0.73478	0.76008	0.71093	0.77972	0.71339	0.72161	0.71513	0.72341	0.77652	0.7227	0.79719	0.73568	0.69368	0.71295	0.70287	0.71318	0.68413	0.71958	0.7221	0.71908	0.68988	0.69385	0.69019	0.82543	0.72116	0.72182	0.7183	0.78813	0.70094	0.71333	0.71476
GDSC_nb1	0.71326	0.71049	0.6913	0.73286	0.72281	0.75448	0.7134	0.71954	0.71988	0.71227	0.72204	0.71851	0.71736	0.73881	0.73242	0.73586	0.70192	0.75032	0.74336	0.70494	0.70717	0.69823	0.72083	0.73597	0.71149	0.69905	0.69302	0.71972	0.7041	0.74414	0.66925	0.69434	0.69242	0.73474	0.69915	0.70061	0.71262	0.69957	0.66417	0.65692	0.67442	0.69609	0.7067	0.71829	0.73678	0.69382	0.67164	0.70236	0.71661
GDSC_nb4	0.76917	0.72765	0.72396	0.7274	0.73433	0.76494	0.73879	0.74104	0.74524	0.72461	0.73842	0.72982	0.73129	0.72626	0.73067	0.74514	0.72423	0.73925	0.74895	0.75358	0.72079	0.77074	0.73049	0.73872	0.72705	0.72766	0.77948	0.73277	0.77696	0.74386	0.70421	0.71996	0.70552	0.72802	0.68294	0.73591	0.7393	0.72634	0.70236	0.70024	0.70444	0.77593	0.73367	0.72858	0.73679	0.78652	0.71708	0.7266	0.72242
GDSC_ncih1092	0.7072	0.69672	0.68811	0.74192	0.70459	0.73686	0.70594	0.70557	0.70669	0.69818	0.71233	0.71031	0.69968	0.70943	0.71167	0.7191	0.69304	0.72479	0.71918	0.70035	0.68492	0.69099	0.70372	0.7333	0.70086	0.68682	0.69077	0.70388	0.69505	0.71823	0.64911	0.68361	0.67424	0.71805	0.72254	0.69275	0.691	0.68921	0.65421	0.63471	0.66543	0.69844	0.69266	0.72544	0.71538	0.67711	0.65861	0.69461	0.70499
GDSC_ncih1105	0.69129	0.71312	0.68826	0.73572	0.69823	0.74118	0.71608	0.69872	0.70517	0.6928	0.70414	0.69566	0.69738	0.70994	0.70681	0.70971	0.69175	0.71584	0.72364	0.69221	0.68851	0.68665	0.702	0.73112	0.69192	0.69791	0.68583	0.6927	0.69178	0.7273	0.66009	0.69945	0.67798	0.71052	0.70199	0.69525	0.67965	0.67444	0.65914	0.6556	0.67118	0.68521	0.71512	0.7245	0.71908	0.67548	0.68036	0.69828	0.68939
GDSC_ncih1155	0.72369	0.74194	0.71959	0.76668	0.7408	0.7821	0.74547	0.74743	0.75187	0.73748	0.74751	0.7496	0.74423	0.75392	0.75281	0.75838	0.73276	0.7605	0.76694	0.73184	0.73346	0.72081	0.74829	0.7581	0.74129	0.72242	0.70515	0.74119	0.72655	0.76006	0.69097	0.72063	0.71431	0.7534	0.73645	0.73126	0.7338	0.72467	0.68898	0.68042	0.70495	0.71914	0.73204	0.74164	0.75654	0.70988	0.70646	0.73319	0.73691
GDSC_ncih1299	0.74175	0.78957	0.75504	0.78074	0.78596	0.82504	0.79672	0.79739	0.80278	0.80061	0.80917	0.78986	0.78897	0.79423	0.79045	0.80335	0.77433	0.79195	0.80998	0.76665	0.77969	0.75431	0.80024	0.77459	0.79228	0.7622	0.72768	0.80016	0.75496	0.78532	0.73698	0.75183	0.7712	0.7885	0.73168	0.78167	0.78952	0.7798	0.74644	0.73132	0.75684	0.7389	0.77477	0.7592	0.80778	0.73307	0.7581	0.77261	0.77575
GDSC_ncih1341	0.72277	0.74064	0.72715	0.75487	0.74398	0.76572	0.74425	0.74696	0.74567	0.73315	0.74953	0.74446	0.74302	0.75036	0.7325	0.75509	0.75482	0.74592	0.75844	0.723	0.73647	0.71844	0.7433	0.74985	0.73662	0.73233	0.70255	0.73566	0.71989	0.75092	0.70186	0.73179	0.7119	0.75367	0.71632	0.74142	0.73451	0.7231	0.70904	0.70387	0.72371	0.71549	0.74228	0.75189	0.75308	0.7084	0.72216	0.7316	0.74424
GDSC_ncih1355	0.69994	0.77059	0.77713	0.75922	0.74843	0.78025	0.77758	0.77675	0.77184	0.75858	0.77213	0.75966	0.75616	0.76377	0.75739	0.76794	0.76995	0.74955	0.77071	0.72629	0.77789	0.72523	0.80901	0.73785	0.77127	0.76254	0.68748	0.75084	0.71695	0.75046	0.76058	0.76126	0.75456	0.76197	0.72452	0.78093	0.7596	0.76698	0.74961	0.75074	0.76425	0.6958	0.7736	0.75686	0.7715	0.69878	0.76615	0.76626	0.74725
GDSC_ncih1395	0.72587	0.791	0.77434	0.77029	0.80078	0.79584	0.78735	0.79437	0.80123	0.79708	0.79398	0.80353	0.7938	0.79062	0.77699	0.79588	0.78769	0.76603	0.80061	0.74281	0.79972	0.74921	0.79853	0.75894	0.78706	0.76734	0.70817	0.78347	0.73771	0.76414	0.75606	0.76871	0.77527	0.80671	0.73563	0.79018	0.79632	0.79564	0.76825	0.76076	0.77971	0.71458	0.78651	0.77051	0.80197	0.71975	0.78136	0.7736	0.78429
GDSC_ncih1435	0.70498	0.77913	0.81418	0.77678	0.73364	0.76994	0.79216	0.77536	0.77167	0.74332	0.75844	0.75296	0.74836	0.74353	0.73482	0.75869	0.76955	0.73594	0.76147	0.73604	0.76494	0.73399	0.78288	0.72848	0.7632	0.79615	0.69836	0.74035	0.7255	0.74305	0.80048	0.78782	0.73763	0.74171	0.75872	0.79522	0.75493	0.77418	0.76613	0.7703	0.77626	0.70856	0.7911	0.77999	0.74887	0.70925	0.78769	0.79837	0.73879
GDSC_ncih146	0.68847	0.70317	0.70073	0.74305	0.6902	0.73254	0.71455	0.707	0.70457	0.69451	0.70434	0.70577	0.69465	0.70571	0.701	0.71118	0.6912	0.71269	0.71481	0.69458	0.68242	0.69163	0.70196	0.72231	0.70306	0.69701	0.67339	0.69826	0.69325	0.70904	0.66185	0.6924	0.67648	0.7041	0.73494	0.70299	0.68652	0.69334	0.66345	0.65236	0.67867	0.68372	0.6972	0.72215	0.70655	0.6714	0.67826	0.70949	0.69269
GDSC_ncih1563	0.71453	0.76939	0.75024	0.75562	0.77563	0.78515	0.78049	0.77791	0.77824	0.7747	0.78835	0.78427	0.76944	0.7856	0.75795	0.78262	0.76706	0.75285	0.78098	0.72894	0.78235	0.72597	0.78954	0.74576	0.77206	0.75011	0.69759	0.7681	0.71886	0.75778	0.7389	0.75026	0.7674	0.78529	0.71902	0.76418	0.77151	0.76371	0.74613	0.73117	0.75904	0.69926	0.77294	0.75889	0.77766	0.7013	0.74791	0.75277	0.76828
GDSC_ncih1568	0.71502	0.80028	0.7864	0.76812	0.75728	0.78842	0.82655	0.78414	0.78354	0.76841	0.79139	0.77072	0.76101	0.7664	0.75336	0.77314	0.79699	0.75039	0.7755	0.73679	0.77408	0.73506	0.78968	0.74069	0.7804	0.78331	0.70255	0.75994	0.72824	0.75115	0.76918	0.78912	0.76311	0.76491	0.73382	0.81425	0.76786	0.77784	0.79034	0.78493	0.80039	0.70986	0.81791	0.78294	0.77462	0.71192	0.79647	0.78405	0.75325
GDSC_ncih1573	0.68182	0.76464	0.79757	0.76677	0.72579	0.75642	0.7742	0.76474	0.75614	0.73866	0.75101	0.75742	0.74583	0.73622	0.7278	0.74958	0.76379	0.72564	0.75675	0.72046	0.76339	0.72033	0.77903	0.72004	0.76112	0.76171	0.67075	0.7374	0.70856	0.72604	0.77602	0.77147	0.74688	0.74089	0.75182	0.78633	0.73784	0.77151	0.75592	0.75956	0.77014	0.68251	0.77241	0.76804	0.73578	0.68519	0.77174	0.76599	0.73715
GDSC_ncih1581	0.70904	0.73901	0.71782	0.7486	0.73264	0.77848	0.74457	0.73808	0.74444	0.72719	0.73518	0.73476	0.73612	0.74192	0.76253	0.75582	0.72353	0.78496	0.76425	0.7304	0.72946	0.72008	0.75558	0.74763	0.73729	0.72275	0.69579	0.73417	0.71891	0.7693	0.6976	0.72266	0.7169	0.73583	0.69923	0.73305	0.72438	0.71925	0.68783	0.68339	0.71044	0.70389	0.73559	0.7326	0.75372	0.69859	0.71295	0.74033	0.72562
GDSC_ncih1623	0.69976	0.77938	0.77565	0.76865	0.74107	0.77195	0.78754	0.76272	0.76487	0.75037	0.76297	0.75238	0.75296	0.75398	0.7399	0.76478	0.78375	0.73587	0.76741	0.72841	0.76522	0.72411	0.78562	0.73786	0.76159	0.76592	0.68477	0.7429	0.716	0.73661	0.74574	0.78011	0.73484	0.7574	0.74226	0.78892	0.74883	0.75302	0.75445	0.75404	0.77407	0.6989	0.79464	0.78004	0.75843	0.69165	0.77467	0.76981	0.74275
GDSC_ncih1650	0.71044	0.79449	0.77175	0.75853	0.7673	0.7834	0.80923	0.77689	0.78293	0.77207	0.78449	0.77964	0.76218	0.77573	0.76474	0.76845	0.7989	0.75195	0.77772	0.72779	0.78624	0.72968	0.78651	0.74106	0.77914	0.77123	0.69611	0.75725	0.71993	0.75353	0.76467	0.78716	0.76901	0.77951	0.7235	0.80321	0.77563	0.77451	0.7906	0.78273	0.80029	0.69921	0.81712	0.78019	0.78067	0.70654	0.79209	0.77192	0.75839
GDSC_ncih1651	0.69823	0.76124	0.75189	0.75443	0.75264	0.77324	0.77076	0.77264	0.77802	0.76044	0.77135	0.77193	0.76478	0.77261	0.74346	0.77227	0.75522	0.74299	0.77067	0.71572	0.77845	0.71866	0.79353	0.7421	0.77798	0.74465	0.67861	0.75003	0.70521	0.73813	0.74914	0.74273	0.75447	0.768	0.72618	0.76208	0.76409	0.77311	0.73679	0.72512	0.75994	0.686	0.75634	0.74549	0.76564	0.685	0.74831	0.76666	0.75311
GDSC_ncih1666	0.69647	0.79796	0.7821	0.74901	0.74312	0.76885	0.79852	0.77355	0.77128	0.75853	0.77032	0.76495	0.75781	0.75319	0.73386	0.76058	0.78785	0.72689	0.76797	0.7211	0.77331	0.72798	0.77942	0.71996	0.76605	0.76969	0.68869	0.74681	0.71482	0.73024	0.77472	0.78937	0.76146	0.75319	0.71919	0.81262	0.75678	0.7784	0.79411	0.79832	0.79862	0.69311	0.79654	0.76675	0.75744	0.7031	0.80667	0.76682	0.7411
GDSC_ncih1693	0.71463	0.79737	0.76156	0.76913	0.76828	0.79565	0.80947	0.77425	0.78605	0.77302	0.79279	0.7745	0.76287	0.76974	0.75708	0.77361	0.78038	0.75889	0.77698	0.74037	0.76075	0.7323	0.78815	0.74674	0.78016	0.77122	0.69698	0.76924	0.726	0.7544	0.74119	0.76069	0.75432	0.76392	0.72479	0.78688	0.76967	0.76258	0.75983	0.7483	0.77846	0.71058	0.78225	0.76719	0.78198	0.70253	0.76934	0.7814	0.75154
GDSC_ncih1694	0.71023	0.70514	0.68763	0.73456	0.71524	0.74431	0.71246	0.71476	0.7133	0.71226	0.71731	0.71773	0.71072	0.72352	0.71597	0.72866	0.71008	0.72824	0.72897	0.7021	0.69878	0.69297	0.71722	0.73418	0.71154	0.69547	0.69017	0.7141	0.70184	0.72556	0.65751	0.68951	0.68397	0.72883	0.70837	0.70388	0.70486	0.69317	0.66534	0.65399	0.68011	0.69607	0.70412	0.72145	0.72207	0.68677	0.67097	0.69737	0.71154
GDSC_ncih1703	0.73885	0.77858	0.75335	0.7689	0.77361	0.81291	0.78755	0.79111	0.79469	0.77374	0.78617	0.76845	0.76987	0.79034	0.7897	0.78815	0.76605	0.78659	0.79178	0.75351	0.7814	0.74611	0.79529	0.76348	0.78264	0.75659	0.72774	0.77606	0.74948	0.79332	0.73735	0.75343	0.7536	0.78336	0.72157	0.76887	0.77731	0.76223	0.74092	0.73357	0.75078	0.73236	0.77967	0.76167	0.79954	0.73117	0.75021	0.75965	0.76602
GDSC_ncih1734	0.705	0.78511	0.77411	0.77184	0.74352	0.77596	0.79037	0.76455	0.76951	0.76493	0.77454	0.77394	0.75698	0.75752	0.73756	0.77344	0.76775	0.74088	0.76959	0.72645	0.75528	0.73245	0.77582	0.74156	0.76676	0.7628	0.69412	0.75173	0.72246	0.73757	0.75561	0.76171	0.75675	0.75763	0.74738	0.79035	0.76091	0.77772	0.76018	0.75376	0.77336	0.70362	0.7662	0.76325	0.75922	0.70326	0.77917	0.76999	0.74602
GDSC_ncih1755	0.72968	0.79143	0.76365	0.77321	0.79134	0.80768	0.79206	0.79664	0.80683	0.7996	0.80252	0.80318	0.79208	0.80047	0.77919	0.80233	0.77907	0.77159	0.8015	0.75109	0.80046	0.74756	0.80872	0.76946	0.79733	0.76812	0.7144	0.79076	0.73996	0.77098	0.7528	0.76172	0.7869	0.80015	0.7443	0.78133	0.79898	0.79371	0.75761	0.74734	0.77402	0.71749	0.78004	0.76183	0.80534	0.72227	0.77133	0.77387	0.77437
GDSC_ncih1792	0.71221	0.7937	0.75405	0.75852	0.78259	0.79668	0.78813	0.78487	0.7959	0.80424	0.79613	0.80029	0.78473	0.78902	0.76425	0.79124	0.77842	0.75597	0.7925	0.73405	0.79361	0.73455	0.80206	0.75224	0.79417	0.75413	0.69493	0.7823	0.72398	0.74895	0.76054	0.74324	0.79392	0.79352	0.72867	0.79314	0.79883	0.809	0.76193	0.74856	0.78023	0.70483	0.76309	0.74805	0.78971	0.70933	0.77537	0.76342	0.76832
GDSC_ncih1793	0.71327	0.78988	0.76491	0.76771	0.76906	0.79881	0.79406	0.78805	0.79547	0.77891	0.78891	0.78014	0.78004	0.78642	0.76607	0.78213	0.78059	0.75733	0.78874	0.74331	0.797	0.73947	0.81063	0.75018	0.78762	0.77119	0.70117	0.77342	0.7341	0.76527	0.75953	0.76957	0.7643	0.78195	0.738	0.78636	0.78046	0.78011	0.75757	0.75369	0.77385	0.71267	0.78904	0.76742	0.78811	0.70814	0.77653	0.77735	0.76556
GDSC_ncih1838	0.7172	0.78521	0.77029	0.76665	0.75806	0.79547	0.79779	0.78512	0.7888	0.76911	0.78212	0.77564	0.76532	0.76634	0.75825	0.7752	0.77618	0.75229	0.77492	0.74211	0.77491	0.73902	0.78874	0.743	0.78871	0.77631	0.70311	0.76448	0.73553	0.75776	0.76039	0.7631	0.7553	0.76676	0.7335	0.78633	0.77032	0.77862	0.75976	0.75658	0.76944	0.71527	0.77839	0.76744	0.76885	0.71703	0.77043	0.77723	0.75497
GDSC_ncih1869	0.7047	0.78517	0.78638	0.76223	0.7375	0.77002	0.80149	0.77231	0.77411	0.74897	0.76473	0.75985	0.74579	0.7456	0.73562	0.75487	0.7728	0.73326	0.75677	0.7267	0.7619	0.73458	0.77172	0.72555	0.76921	0.77715	0.69597	0.74292	0.7203	0.73471	0.77476	0.77625	0.74463	0.7476	0.72505	0.80185	0.76044	0.77192	0.78288	0.77982	0.77803	0.70282	0.79018	0.77603	0.75749	0.70889	0.79111	0.77311	0.73763
GDSC_ncih1915	0.70886	0.78273	0.75358	0.74658	0.77655	0.7885	0.7773	0.78014	0.79013	0.79517	0.79805	0.78506	0.77631	0.77762	0.75144	0.78059	0.75943	0.74966	0.78336	0.73505	0.77543	0.73722	0.7839	0.74399	0.78084	0.74681	0.69899	0.78983	0.72842	0.74408	0.7477	0.73153	0.78498	0.78413	0.71844	0.77587	0.79173	0.79089	0.75289	0.74619	0.75797	0.70926	0.75246	0.73669	0.77152	0.71139	0.75608	0.7528	0.76485
GDSC_ncih1944	0.69918	0.76819	0.78455	0.76347	0.74004	0.7703	0.78027	0.78919	0.77775	0.75316	0.76836	0.76281	0.75646	0.75502	0.74296	0.76457	0.76498	0.74075	0.76699	0.72694	0.78535	0.73091	0.80651	0.73479	0.7787	0.76698	0.6843	0.75128	0.71635	0.73582	0.76635	0.76361	0.74347	0.7562	0.74386	0.77934	0.75795	0.77764	0.74932	0.75063	0.76799	0.6985	0.7704	0.75548	0.75691	0.69529	0.77044	0.77326	0.74505
GDSC_ncih196	0.71998	0.75833	0.72526	0.74707	0.79428	0.78299	0.76957	0.76426	0.77719	0.78429	0.78319	0.80819	0.77641	0.7935	0.76533	0.78634	0.75469	0.763	0.77842	0.72789	0.76883	0.73338	0.76711	0.76118	0.76931	0.73452	0.70461	0.77375	0.71853	0.75851	0.71516	0.7262	0.76662	0.79926	0.70564	0.7512	0.78818	0.7671	0.7372	0.71922	0.75197	0.70081	0.7462	0.73572	0.7881	0.70647	0.73687	0.73845	0.77382
GDSC_ncih1975	0.7271	0.80593	0.78191	0.7746	0.78388	0.80532	0.80687	0.79595	0.80418	0.79599	0.80574	0.79271	0.78443	0.78782	0.77285	0.78596	0.79888	0.76117	0.79598	0.74898	0.79605	0.75158	0.8019	0.75415	0.79459	0.78302	0.71217	0.78736	0.74238	0.76826	0.77717	0.77432	0.7828	0.79825	0.73181	0.81378	0.79259	0.80335	0.78843	0.7813	0.79551	0.71957	0.79849	0.7757	0.79126	0.7209	0.79819	0.78169	0.77337
GDSC_ncih2009	0.69788	0.78137	0.76201	0.7466	0.74038	0.77234	0.78901	0.76571	0.77607	0.7661	0.7683	0.7616	0.75331	0.75063	0.72811	0.75789	0.76206	0.73218	0.76073	0.72608	0.76078	0.72437	0.76247	0.72057	0.75883	0.75303	0.68473	0.75359	0.72062	0.72713	0.74657	0.74802	0.75895	0.75324	0.72482	0.78756	0.77742	0.77907	0.76872	0.76381	0.76516	0.69905	0.7701	0.74562	0.75659	0.71003	0.76668	0.75644	0.74728
GDSC_ncih2023	0.70032	0.76442	0.77749	0.76829	0.75387	0.77962	0.7756	0.7878	0.78262	0.7617	0.77446	0.77616	0.76561	0.76826	0.75675	0.77074	0.76317	0.75701	0.77389	0.7337	0.79399	0.73391	0.82042	0.74241	0.78597	0.75814	0.68705	0.75734	0.72097	0.74846	0.75881	0.7612	0.76279	0.77	0.74744	0.77237	0.76835	0.78676	0.74822	0.74504	0.76757	0.69775	0.77217	0.75612	0.77062	0.69598	0.76151	0.76902	0.75359
GDSC_ncih2029	0.69571	0.71323	0.72201	0.74958	0.70195	0.73303	0.72728	0.71644	0.71421	0.70128	0.71575	0.7218	0.70495	0.70816	0.70683	0.71693	0.70844	0.70767	0.7193	0.70251	0.70052	0.70471	0.71026	0.71814	0.71042	0.71613	0.68697	0.69921	0.70247	0.70936	0.69188	0.71753	0.68968	0.70974	0.75482	0.71882	0.69691	0.70774	0.6801	0.67628	0.69771	0.69479	0.72185	0.74649	0.71201	0.68219	0.69736	0.71375	0.70718
GDSC_ncih2030	0.71907	0.7817	0.77209	0.77332	0.77618	0.8038	0.79417	0.79318	0.79546	0.78271	0.79667	0.78222	0.77869	0.78215	0.77323	0.7938	0.77588	0.76778	0.79228	0.746	0.79174	0.74017	0.81314	0.75534	0.79346	0.76604	0.70198	0.78031	0.73483	0.76955	0.75139	0.75958	0.76457	0.78213	0.73871	0.78247	0.7804	0.7813	0.75632	0.74332	0.76594	0.71574	0.7814	0.76003	0.78839	0.71439	0.76621	0.77347	0.76951
GDSC_ncih2052	0.69331	0.79581	0.7285	0.72368	0.79216	0.78984	0.78102	0.77687	0.8003	0.81508	0.81078	0.78571	0.78096	0.80178	0.75269	0.77843	0.76065	0.73804	0.78607	0.70422	0.79115	0.70889	0.7826	0.73891	0.78692	0.73556	0.67559	0.79237	0.705	0.73834	0.74049	0.72565	0.79965	0.79685	0.69562	0.76741	0.79543	0.77559	0.75696	0.74743	0.77395	0.67614	0.75066	0.73207	0.7917	0.69067	0.76122	0.74911	0.76277
GDSC_ncih2085	0.70083	0.78167	0.75053	0.74598	0.75359	0.77024	0.8046	0.75634	0.76668	0.75768	0.76833	0.75925	0.74081	0.7599	0.7433	0.75599	0.76648	0.73653	0.75748	0.71309	0.75632	0.71301	0.77018	0.72842	0.76112	0.76019	0.68679	0.74218	0.70516	0.7355	0.74491	0.75611	0.75915	0.75561	0.70791	0.78153	0.76466	0.7605	0.76511	0.75411	0.77594	0.68935	0.78196	0.76007	0.76505	0.69617	0.76033	0.76822	0.73784
GDSC_ncih2087	0.72998	0.80741	0.79199	0.78243	0.76869	0.80378	0.81721	0.79606	0.80026	0.78081	0.79874	0.7855	0.77483	0.773	0.76049	0.7836	0.79677	0.75665	0.79133	0.75831	0.78328	0.75716	0.79575	0.75162	0.79507	0.79029	0.71718	0.78106	0.75004	0.75836	0.77946	0.78674	0.76787	0.77371	0.74995	0.81976	0.7826	0.7998	0.78615	0.78253	0.79215	0.73223	0.80267	0.78142	0.77409	0.73325	0.80262	0.79448	0.76361
GDSC_ncih209	0.72371	0.72527	0.72221	0.76438	0.71812	0.75825	0.74134	0.72841	0.72949	0.71226	0.72851	0.72451	0.71395	0.72639	0.72605	0.73602	0.71784	0.73648	0.73596	0.71986	0.70164	0.71064	0.7284	0.74807	0.72009	0.72224	0.71193	0.71838	0.7134	0.73712	0.67878	0.71402	0.69291	0.72851	0.74446	0.7269	0.70922	0.7038	0.68629	0.67197	0.69825	0.7156	0.72898	0.75484	0.72955	0.69754	0.69368	0.72424	0.71579
GDSC_ncih211	0.73363	0.75094	0.74586	0.77624	0.73376	0.77873	0.76584	0.75193	0.75139	0.73351	0.74967	0.74072	0.73834	0.73465	0.7365	0.75388	0.74224	0.75556	0.75836	0.75058	0.72606	0.73965	0.74953	0.74995	0.7429	0.7506	0.71932	0.7396	0.73747	0.75062	0.70792	0.74109	0.71166	0.73956	0.74516	0.7541	0.73132	0.73496	0.71166	0.69943	0.72478	0.73359	0.75277	0.77022	0.74827	0.71882	0.72397	0.75812	0.73522
GDSC_ncih2110	0.70396	0.77681	0.79981	0.76844	0.74085	0.7745	0.7891	0.77326	0.77142	0.74994	0.76583	0.7552	0.75292	0.7544	0.73991	0.76665	0.78302	0.73676	0.7631	0.73055	0.77154	0.73038	0.79487	0.7339	0.76791	0.77442	0.69204	0.74461	0.72321	0.74199	0.77014	0.78453	0.74118	0.75184	0.74384	0.79928	0.76446	0.77406	0.76765	0.77322	0.77974	0.70469	0.78889	0.77534	0.7611	0.70449	0.78322	0.78054	0.74103
GDSC_ncih2122	0.7138	0.80329	0.81002	0.77932	0.74918	0.78642	0.80602	0.79442	0.78883	0.76667	0.78502	0.76701	0.77122	0.76207	0.74513	0.77819	0.79588	0.74532	0.77842	0.74599	0.78254	0.7452	0.80478	0.73605	0.78211	0.79284	0.70093	0.76612	0.73529	0.74785	0.78194	0.79154	0.75402	0.75938	0.74959	0.81492	0.76864	0.78651	0.77988	0.78491	0.79077	0.71837	0.79401	0.78386	0.76309	0.71193	0.80875	0.79043	0.75468
GDSC_ncih2126	0.74532	0.71893	0.71435	0.70871	0.71758	0.73847	0.73244	0.7355	0.73959	0.7179	0.72681	0.7396	0.72468	0.7175	0.71242	0.72774	0.71246	0.71517	0.72668	0.74694	0.71677	0.76531	0.71958	0.70646	0.72487	0.71364	0.75126	0.72401	0.7739	0.70988	0.69498	0.70244	0.71247	0.7178	0.6768	0.72293	0.72797	0.73099	0.70806	0.7039	0.70322	0.77108	0.7146	0.70956	0.71402	0.75732	0.71131	0.70836	0.72322
GDSC_ncih2141	0.70681	0.7073	0.69739	0.75013	0.70277	0.74058	0.71692	0.70663	0.7096	0.701	0.71423	0.70826	0.69944	0.71209	0.70859	0.72112	0.70075	0.72257	0.72301	0.69999	0.68865	0.69239	0.70721	0.73434	0.70491	0.69831	0.69053	0.69974	0.69986	0.71915	0.66072	0.69685	0.68512	0.71821	0.73051	0.70625	0.69919	0.6936	0.66913	0.65445	0.67951	0.69684	0.7041	0.73323	0.71617	0.68669	0.67406	0.70624	0.70259
GDSC_ncih2170	0.72645	0.78347	0.79338	0.79522	0.74362	0.78931	0.79581	0.78035	0.77978	0.75724	0.76812	0.76052	0.76154	0.75373	0.74796	0.77397	0.7749	0.75715	0.77329	0.75259	0.76701	0.75078	0.78667	0.74936	0.77596	0.78294	0.71111	0.75553	0.74304	0.75002	0.75853	0.7829	0.7343	0.75463	0.76484	0.79269	0.75947	0.77216	0.7487	0.7505	0.76802	0.72939	0.78615	0.79232	0.76129	0.72275	0.77898	0.79076	0.75319
GDSC_ncih2172	0.72377	0.75898	0.7548	0.76052	0.77111	0.78767	0.7759	0.77023	0.77452	0.77028	0.78195	0.76746	0.76446	0.7757	0.76875	0.77688	0.75994	0.76693	0.77991	0.73675	0.77142	0.73191	0.79652	0.75491	0.76346	0.755	0.70995	0.76158	0.72689	0.76938	0.73147	0.75486	0.75474	0.7805	0.71799	0.76003	0.77182	0.75685	0.73391	0.72433	0.75272	0.71074	0.77844	0.76133	0.78693	0.7102	0.74485	0.7603	0.75798
GDSC_ncih2196	0.70012	0.72933	0.72505	0.75774	0.71605	0.74973	0.73485	0.72662	0.7298	0.7173	0.72674	0.72966	0.72027	0.73344	0.72418	0.73286	0.72307	0.72282	0.73136	0.70396	0.71916	0.69991	0.73112	0.73245	0.72216	0.71787	0.6858	0.71542	0.70365	0.73239	0.69027	0.71991	0.70391	0.73081	0.75262	0.72715	0.71535	0.71161	0.6924	0.68823	0.70631	0.69259	0.73372	0.74369	0.72869	0.68288	0.70379	0.72346	0.71707
GDSC_ncih2228	0.71641	0.80546	0.77116	0.75613	0.78258	0.79434	0.80343	0.79956	0.80296	0.79952	0.8103	0.79784	0.78381	0.79498	0.76349	0.78931	0.79016	0.74933	0.79098	0.73225	0.80239	0.73843	0.8053	0.7516	0.79851	0.76905	0.70178	0.78793	0.72806	0.74945	0.78042	0.75738	0.79455	0.80024	0.73194	0.80722	0.80108	0.80978	0.78095	0.77845	0.79693	0.70659	0.78742	0.76416	0.79104	0.70976	0.79375	0.77339	0.77131
GDSC_ncih226	0.73056	0.80541	0.76526	0.75679	0.79852	0.80961	0.81674	0.81032	0.81715	0.80441	0.82476	0.79301	0.7911	0.81561	0.77192	0.79879	0.79214	0.76309	0.79278	0.73891	0.8062	0.74267	0.81065	0.75574	0.81091	0.77428	0.71683	0.80057	0.74028	0.76721	0.75815	0.76468	0.78804	0.80297	0.72413	0.78845	0.8083	0.78797	0.7806	0.7712	0.7883	0.72138	0.79244	0.76531	0.80509	0.72505	0.77658	0.7727	0.78104
GDSC_ncih2286	0.72821	0.78856	0.75888	0.76354	0.78157	0.81374	0.79258	0.79253	0.801	0.79201	0.81119	0.78516	0.78049	0.79596	0.78262	0.79317	0.77681	0.78589	0.792	0.7404	0.78559	0.7419	0.81255	0.76371	0.80338	0.75744	0.71556	0.78659	0.73774	0.76902	0.74848	0.75109	0.7791	0.78478	0.7265	0.77759	0.79502	0.77951	0.75446	0.74379	0.76975	0.72072	0.77149	0.75296	0.80002	0.72306	0.76257	0.76933	0.76635
GDSC_ncih2291	0.70237	0.80341	0.77377	0.75813	0.75364	0.7817	0.80249	0.78248	0.79064	0.77518	0.79008	0.76467	0.75897	0.76679	0.74193	0.76338	0.77979	0.73228	0.76503	0.72319	0.77366	0.72705	0.77855	0.72699	0.78247	0.77475	0.68946	0.76382	0.71853	0.73599	0.77272	0.76029	0.75661	0.76861	0.72423	0.79713	0.76905	0.78006	0.77829	0.77564	0.78003	0.69913	0.78491	0.76423	0.76724	0.70143	0.78972	0.77107	0.74986
GDSC_ncih23	0.73724	0.78963	0.77137	0.78055	0.77834	0.81602	0.79427	0.79284	0.79701	0.78541	0.80054	0.78089	0.78366	0.78595	0.78913	0.79428	0.78448	0.78983	0.80027	0.75488	0.78452	0.74899	0.81047	0.77257	0.79378	0.76758	0.72016	0.78346	0.74949	0.77936	0.75038	0.76281	0.76811	0.78672	0.74048	0.79016	0.78782	0.78443	0.75677	0.74563	0.76815	0.73134	0.78525	0.76695	0.7992	0.73351	0.76514	0.7813	0.77038
GDSC_ncih2342	0.70415	0.76673	0.77422	0.76582	0.7318	0.77034	0.79249	0.75934	0.75991	0.73829	0.75621	0.74611	0.73914	0.7423	0.73555	0.74957	0.76584	0.73861	0.75057	0.72935	0.74947	0.72597	0.77123	0.72714	0.75636	0.7739	0.69427	0.73338	0.71701	0.74134	0.74451	0.78781	0.72102	0.73738	0.72792	0.78079	0.74526	0.74427	0.74438	0.74622	0.76582	0.70943	0.79287	0.7841	0.74992	0.69894	0.76363	0.78291	0.73049
GDSC_ncih2405	0.70776	0.79395	0.77757	0.7561	0.76788	0.7881	0.78687	0.79516	0.79125	0.77595	0.78528	0.7794	0.77391	0.78527	0.77144	0.78022	0.7802	0.75762	0.78626	0.72647	0.79111	0.72915	0.8045	0.75011	0.79202	0.77151	0.69665	0.76817	0.7217	0.75744	0.80274	0.75866	0.7766	0.78155	0.73341	0.7917	0.77959	0.79344	0.76704	0.76442	0.78226	0.7003	0.7771	0.75454	0.78177	0.70903	0.78703	0.78078	0.76037
GDSC_ncih2444	0.71311	0.80789	0.77919	0.76972	0.76082	0.78658	0.81195	0.78009	0.78514	0.77491	0.7892	0.77431	0.76242	0.77025	0.75173	0.77266	0.79154	0.74492	0.77509	0.73066	0.7776	0.73177	0.78612	0.74355	0.78119	0.78111	0.69868	0.76324	0.72281	0.75096	0.7652	0.7775	0.76413	0.77115	0.73476	0.80876	0.77336	0.77664	0.7889	0.7734	0.79221	0.70602	0.79918	0.78524	0.77302	0.70658	0.79423	0.78409	0.75742
GDSC_ncih2452	0.72722	0.79467	0.75784	0.75519	0.79536	0.80669	0.80472	0.8101	0.81814	0.80346	0.81882	0.79346	0.78408	0.81632	0.77129	0.79553	0.77732	0.76112	0.79209	0.7317	0.80654	0.73788	0.79532	0.75854	0.80323	0.76323	0.7166	0.79191	0.73171	0.76775	0.75753	0.75227	0.79301	0.80482	0.71802	0.78097	0.80782	0.79236	0.76923	0.76441	0.78081	0.71494	0.78296	0.75913	0.80667	0.72416	0.77036	0.76457	0.77474
GDSC_ncih28	0.72572	0.77137	0.75798	0.75841	0.75721	0.78627	0.77538	0.82998	0.81081	0.76711	0.77556	0.76182	0.76448	0.78433	0.75536	0.77939	0.75741	0.75396	0.77967	0.72928	0.80419	0.72832	0.79273	0.74393	0.80523	0.75526	0.70707	0.76402	0.72738	0.76199	0.74491	0.75038	0.74823	0.77632	0.73269	0.76379	0.7794	0.76908	0.73574	0.7317	0.74445	0.7155	0.77214	0.76026	0.77363	0.71934	0.7433	0.76551	0.76161
GDSC_ncih358	0.69737	0.77606	0.78176	0.7586	0.73434	0.75911	0.79133	0.76362	0.76415	0.75519	0.76047	0.76318	0.74222	0.7429	0.72972	0.75509	0.76573	0.72904	0.75932	0.72315	0.75998	0.72923	0.76345	0.71858	0.75583	0.76495	0.68824	0.74032	0.71531	0.72732	0.76807	0.76866	0.76503	0.75277	0.73836	0.80154	0.75184	0.78481	0.77703	0.77439	0.77458	0.69408	0.78078	0.7678	0.74601	0.69614	0.78281	0.7567	0.74183
GDSC_ncih441	0.71574	0.79086	0.79481	0.76955	0.74792	0.77681	0.80515	0.78025	0.78235	0.76465	0.77671	0.7638	0.75218	0.75202	0.74111	0.76305	0.77649	0.737	0.76434	0.73623	0.76965	0.74067	0.77544	0.73148	0.77183	0.78339	0.70627	0.75689	0.73008	0.74147	0.78123	0.78584	0.75565	0.75963	0.74098	0.8042	0.76558	0.78472	0.78004	0.77995	0.78225	0.71581	0.79606	0.78098	0.7578	0.7195	0.79497	0.77808	0.74851
GDSC_ncih446	0.7071	0.7217	0.70307	0.74576	0.7443	0.75725	0.73195	0.73172	0.734	0.73776	0.75046	0.75226	0.74423	0.74029	0.71982	0.75126	0.71813	0.74292	0.75113	0.7182	0.71545	0.71593	0.73577	0.73914	0.72731	0.70561	0.68544	0.74682	0.71279	0.72746	0.66871	0.69753	0.71454	0.75177	0.71566	0.71667	0.72879	0.72504	0.68413	0.66951	0.69965	0.7037	0.7117	0.72328	0.74551	0.68826	0.68877	0.71505	0.74368
GDSC_ncih520	0.72277	0.75762	0.75605	0.77363	0.73902	0.77344	0.76563	0.76083	0.75965	0.73882	0.75283	0.75037	0.74941	0.74919	0.74574	0.76418	0.76094	0.75629	0.76914	0.74216	0.74376	0.73663	0.76195	0.75104	0.75247	0.75456	0.70887	0.74485	0.73344	0.7542	0.72009	0.74661	0.72515	0.74952	0.73718	0.76122	0.7447	0.73961	0.72479	0.71882	0.74361	0.72194	0.75802	0.76715	0.75427	0.71701	0.73755	0.7619	0.74413
GDSC_ncih522	0.72925	0.75365	0.73375	0.76091	0.7521	0.79225	0.7632	0.75453	0.75592	0.74263	0.75542	0.75086	0.74526	0.75732	0.77533	0.76053	0.74225	0.78801	0.76922	0.74015	0.74092	0.73209	0.76773	0.75657	0.75411	0.74366	0.72052	0.74593	0.73096	0.78446	0.71423	0.73351	0.73475	0.7539	0.71356	0.74955	0.74593	0.73523	0.71466	0.70888	0.72584	0.72418	0.75175	0.75355	0.76357	0.72045	0.72182	0.75006	0.74117
GDSC_ncih524	0.71234	0.71612	0.69388	0.74451	0.71798	0.75682	0.71785	0.71707	0.72313	0.71693	0.72547	0.7225	0.71715	0.72006	0.72515	0.73374	0.71235	0.74271	0.73945	0.72032	0.70503	0.70922	0.72625	0.73882	0.71456	0.70064	0.69201	0.71813	0.71309	0.7345	0.65643	0.69898	0.69401	0.72576	0.71466	0.71135	0.71316	0.70335	0.66862	0.65286	0.68482	0.70729	0.70883	0.72608	0.72637	0.69351	0.67667	0.71135	0.7107
GDSC_ncih526	0.72294	0.73563	0.7316	0.76756	0.71635	0.76318	0.74683	0.72852	0.73299	0.71687	0.73013	0.72461	0.72256	0.72311	0.72494	0.74034	0.72643	0.7387	0.74332	0.72607	0.70847	0.71847	0.73182	0.74162	0.7247	0.73203	0.70667	0.71949	0.7225	0.73696	0.69218	0.72634	0.69713	0.72556	0.73904	0.73288	0.70907	0.71238	0.69363	0.68069	0.7014	0.72194	0.73436	0.75202	0.73054	0.70392	0.70838	0.74086	0.72068
GDSC_ncih647	0.71716	0.78318	0.7551	0.75699	0.78542	0.79044	0.78307	0.78635	0.7939	0.80077	0.79824	0.80614	0.78497	0.7859	0.76436	0.79612	0.76984	0.76542	0.79115	0.73438	0.7904	0.73769	0.79773	0.7601	0.78678	0.74587	0.70187	0.78472	0.72961	0.75084	0.74399	0.73787	0.78939	0.79395	0.73261	0.77849	0.8004	0.80247	0.75634	0.74235	0.76892	0.70859	0.75832	0.7424	0.78934	0.71398	0.7624	0.75652	0.77234
GDSC_ncih650	0.73064	0.80044	0.75997	0.76619	0.7815	0.81428	0.79327	0.7869	0.79827	0.80313	0.80585	0.78616	0.78636	0.78297	0.77366	0.79069	0.77173	0.76926	0.8031	0.75538	0.77498	0.75186	0.79367	0.76115	0.78443	0.76045	0.71962	0.7976	0.74869	0.76971	0.75121	0.75009	0.78212	0.7841	0.72841	0.78572	0.78664	0.78906	0.76357	0.74278	0.76185	0.72665	0.77111	0.75323	0.79159	0.72788	0.77162	0.7693	0.76501
GDSC_ncih661	0.71009	0.74758	0.72541	0.74979	0.75366	0.78394	0.75725	0.75016	0.75778	0.74803	0.7619	0.75252	0.74934	0.76649	0.76976	0.76718	0.7423	0.78565	0.76631	0.7257	0.74102	0.7182	0.77079	0.75167	0.75749	0.73065	0.69274	0.74937	0.71818	0.76694	0.70673	0.71637	0.73481	0.76083	0.70231	0.74151	0.7516	0.73626	0.71115	0.7006	0.73021	0.70121	0.73922	0.73515	0.77092	0.69498	0.71726	0.74583	0.74724
GDSC_ncih69	0.69451	0.71274	0.70352	0.74609	0.69967	0.73676	0.71431	0.71066	0.71162	0.70024	0.7136	0.7062	0.70136	0.70635	0.70349	0.71948	0.70218	0.72109	0.71854	0.70072	0.68694	0.69577	0.71212	0.72019	0.70201	0.70049	0.67915	0.70555	0.69606	0.70919	0.6599	0.69611	0.67197	0.71482	0.72285	0.70604	0.6904	0.68955	0.66691	0.65299	0.67989	0.69432	0.69947	0.72763	0.71666	0.67109	0.67961	0.70856	0.70358
GDSC_ncih716	0.70997	0.73135	0.76379	0.77213	0.73704	0.7611	0.74172	0.75185	0.74688	0.73156	0.74501	0.74675	0.73972	0.73887	0.73295	0.75209	0.73931	0.74007	0.75548	0.73053	0.74115	0.73199	0.7562	0.73789	0.74663	0.7452	0.69434	0.74051	0.72512	0.73766	0.7402	0.73443	0.7104	0.74562	0.76118	0.73934	0.73252	0.74663	0.69913	0.69848	0.72134	0.70859	0.73639	0.75055	0.73871	0.70167	0.72923	0.75985	0.73844
GDSC_ncih727	0.69087	0.75398	0.76891	0.76134	0.7198	0.75047	0.7564	0.75478	0.75129	0.73494	0.74284	0.7334	0.72978	0.7308	0.71547	0.73991	0.74188	0.71702	0.74737	0.70674	0.73953	0.70914	0.75561	0.72186	0.7437	0.7505	0.67404	0.72677	0.70708	0.71806	0.75835	0.74484	0.72747	0.73613	0.78428	0.76728	0.72856	0.75657	0.72535	0.72147	0.73658	0.68759	0.75028	0.75854	0.72735	0.68354	0.74672	0.76807	0.72611
GDSC_ncih747	0.70145	0.79188	0.78801	0.75322	0.73789	0.76751	0.80791	0.76984	0.77081	0.74573	0.77027	0.75269	0.74348	0.75414	0.73121	0.75037	0.7718	0.72614	0.75533	0.71845	0.76311	0.72938	0.76943	0.71718	0.76775	0.78915	0.69672	0.74618	0.71825	0.73218	0.79677	0.77029	0.74952	0.74851	0.72431	0.79397	0.75144	0.7708	0.77798	0.78378	0.78522	0.69876	0.79205	0.76881	0.74765	0.70355	0.79074	0.78397	0.73486
GDSC_ncih810	0.69102	0.71076	0.73272	0.7627	0.69393	0.73544	0.72804	0.72396	0.71816	0.69588	0.71053	0.71054	0.70545	0.71263	0.70079	0.72299	0.70469	0.71805	0.72154	0.71004	0.70615	0.70096	0.72017	0.71631	0.71404	0.71533	0.67782	0.70144	0.70394	0.71317	0.69695	0.71533	0.69127	0.7058	0.79702	0.71704	0.69672	0.71597	0.68009	0.67604	0.6929	0.69213	0.71482	0.74249	0.70938	0.67734	0.68883	0.72894	0.70745
GDSC_ncih838	0.71794	0.78288	0.76521	0.7588	0.78545	0.80166	0.79058	0.7841	0.79194	0.78578	0.79081	0.79139	0.78698	0.7879	0.77905	0.79156	0.78062	0.76895	0.79768	0.745	0.79111	0.74216	0.80922	0.75829	0.78361	0.7646	0.70499	0.77236	0.73689	0.76794	0.75473	0.76712	0.78298	0.78413	0.73024	0.78285	0.7953	0.78338	0.76332	0.75795	0.77954	0.71126	0.78727	0.75529	0.79699	0.71788	0.77177	0.77252	0.76153
GDSC_ncih841	0.7178	0.74698	0.73153	0.7615	0.74794	0.79007	0.75795	0.75671	0.75804	0.74571	0.75797	0.75438	0.74671	0.7605	0.76835	0.76525	0.7399	0.78261	0.76851	0.73811	0.74595	0.72368	0.76821	0.75684	0.75987	0.73419	0.70045	0.74668	0.72422	0.77461	0.70955	0.72106	0.73571	0.7607	0.71096	0.74271	0.74759	0.73736	0.71066	0.7011	0.7274	0.71022	0.74432	0.74146	0.76778	0.7029	0.71146	0.74148	0.74559
GDSC_ncih929	0.74559	0.72424	0.72727	0.73469	0.72336	0.75894	0.73414	0.73381	0.73828	0.72088	0.73429	0.72887	0.73033	0.72555	0.72636	0.73684	0.71919	0.73162	0.74732	0.78354	0.71989	0.79252	0.72829	0.72229	0.71983	0.72345	0.74599	0.73256	0.80604	0.73589	0.69713	0.72577	0.70711	0.72484	0.69449	0.72247	0.72105	0.72286	0.69375	0.69132	0.69824	0.7646	0.7308	0.72714	0.73096	0.75131	0.71065	0.72245	0.72064
GDSC_ncin87	0.69951	0.77807	0.7944	0.75412	0.72828	0.76232	0.78934	0.76622	0.75989	0.73233	0.75219	0.74095	0.73446	0.74389	0.726	0.74735	0.77901	0.72343	0.75333	0.719	0.75522	0.72404	0.76608	0.7153	0.75767	0.78885	0.69089	0.73304	0.714	0.72977	0.78136	0.77183	0.72878	0.73774	0.72282	0.79224	0.74237	0.75466	0.76572	0.78125	0.78037	0.70002	0.78008	0.76597	0.74221	0.70177	0.79401	0.77566	0.73248
GDSC_nmcg1	0.69009	0.77923	0.722	0.72532	0.79025	0.77719	0.77414	0.77413	0.7914	0.80205	0.79438	0.78858	0.7815	0.80399	0.74877	0.77989	0.7588	0.72981	0.78219	0.69872	0.78436	0.70224	0.77409	0.73574	0.78573	0.7333	0.67036	0.78438	0.69459	0.73435	0.73251	0.71685	0.78905	0.80492	0.70045	0.76314	0.79241	0.7756	0.75057	0.7353	0.75944	0.6706	0.74538	0.72226	0.77993	0.68365	0.74852	0.73457	0.7703
GDSC_nomo1	0.73455	0.71046	0.70898	0.70944	0.70766	0.73153	0.71907	0.72109	0.72271	0.70675	0.71817	0.71948	0.71203	0.70493	0.70729	0.72257	0.71015	0.70882	0.72274	0.72933	0.70526	0.74523	0.71017	0.71092	0.7088	0.70944	0.74098	0.71277	0.7496	0.70803	0.69548	0.70475	0.6984	0.70929	0.66752	0.71857	0.71807	0.7078	0.69345	0.6892	0.69901	0.74506	0.71243	0.70951	0.70827	0.75286	0.70817	0.7089	0.70471
GDSC_nudul1	0.78527	0.70937	0.71471	0.72234	0.71166	0.75002	0.72807	0.72666	0.72975	0.70449	0.72107	0.72001	0.71255	0.71121	0.71618	0.72574	0.70506	0.729	0.72901	0.75972	0.70228	0.77562	0.71199	0.71693	0.71134	0.72274	0.78511	0.71786	0.79845	0.73012	0.6867	0.70763	0.69244	0.70863	0.67794	0.71394	0.71516	0.70922	0.68508	0.68311	0.68249	0.82748	0.71801	0.72198	0.71586	0.79494	0.69376	0.70655	0.71157
GDSC_nugc3	0.71899	0.80815	0.78687	0.75898	0.75609	0.79194	0.81962	0.78014	0.78678	0.77306	0.79617	0.75822	0.76221	0.76765	0.74716	0.76991	0.77947	0.73955	0.77543	0.73618	0.76437	0.73868	0.7772	0.73502	0.76817	0.78513	0.71055	0.76814	0.73606	0.75099	0.76994	0.77407	0.76237	0.76307	0.72429	0.80165	0.771	0.7707	0.78806	0.77595	0.77878	0.71579	0.79954	0.7682	0.76734	0.72439	0.79595	0.77807	0.74905
GDSC_nugc4	0.68395	0.75071	0.79329	0.74711	0.70463	0.7408	0.76164	0.76825	0.75028	0.7153	0.73364	0.72123	0.7183	0.71866	0.70711	0.72843	0.74505	0.70413	0.7305	0.70422	0.74994	0.71569	0.75394	0.69821	0.75331	0.77591	0.67707	0.71476	0.70345	0.71085	0.797	0.75582	0.71162	0.71814	0.737	0.76509	0.72323	0.74978	0.73976	0.75595	0.7464	0.68526	0.75818	0.75681	0.71789	0.68883	0.7656	0.77433	0.7137
GDSC_oaw28	0.71462	0.78169	0.76248	0.76346	0.75408	0.78346	0.79834	0.76725	0.77121	0.76104	0.77755	0.77056	0.7557	0.75847	0.75277	0.76545	0.77381	0.75988	0.77173	0.73145	0.75749	0.72928	0.77071	0.75144	0.76897	0.77074	0.69964	0.74887	0.72122	0.75297	0.73844	0.77109	0.74786	0.7596	0.72895	0.78983	0.75756	0.75457	0.75524	0.74803	0.77696	0.7072	0.78897	0.77868	0.76719	0.70228	0.77327	0.7751	0.74879
GDSC_oaw42	0.7148	0.77167	0.76705	0.76531	0.75117	0.78624	0.7799	0.79785	0.7884	0.76008	0.77452	0.76134	0.76323	0.77303	0.76212	0.7684	0.76387	0.76319	0.77488	0.73356	0.78734	0.73163	0.79075	0.74605	0.78986	0.7611	0.70264	0.75502	0.72604	0.76812	0.75307	0.7636	0.74956	0.7624	0.72169	0.77276	0.76975	0.76385	0.73912	0.7413	0.75927	0.70912	0.77691	0.76159	0.7745	0.71425	0.75644	0.77212	0.75009
GDSC_oc314	0.72876	0.78975	0.77985	0.78796	0.77198	0.80891	0.80011	0.80417	0.80523	0.78365	0.79155	0.78545	0.77856	0.78016	0.77935	0.78935	0.78348	0.77542	0.79354	0.7519	0.79635	0.74663	0.80101	0.76386	0.80734	0.77599	0.71409	0.77849	0.74115	0.77627	0.75879	0.76579	0.76837	0.78121	0.74224	0.78647	0.78389	0.78315	0.7612	0.75131	0.77088	0.72295	0.78617	0.77525	0.78735	0.72672	0.76657	0.78082	0.76934
GDSC_ociaml2	0.75075	0.74081	0.72506	0.72326	0.73551	0.75703	0.74416	0.75294	0.76214	0.74223	0.7473	0.74509	0.74135	0.73698	0.72656	0.7522	0.73022	0.72833	0.75004	0.73966	0.74021	0.75145	0.74047	0.72662	0.73908	0.7227	0.74886	0.74036	0.75719	0.72741	0.70933	0.71849	0.72478	0.73816	0.68028	0.73844	0.75059	0.7407	0.71359	0.71204	0.71983	0.75258	0.73089	0.71848	0.74139	0.76232	0.7291	0.72494	0.73023
GDSC_ociaml3	0.75154	0.72557	0.72274	0.72414	0.73188	0.75556	0.7329	0.74191	0.74498	0.72882	0.73879	0.73329	0.73357	0.72796	0.72625	0.74711	0.72112	0.73347	0.74784	0.74089	0.72685	0.75825	0.72853	0.72835	0.72602	0.72046	0.75428	0.73304	0.76383	0.73108	0.70808	0.71582	0.72197	0.73222	0.68326	0.72947	0.7414	0.73154	0.70427	0.70266	0.7069	0.75609	0.72596	0.72309	0.73722	0.76732	0.71443	0.71788	0.72761
GDSC_ociaml5	0.75852	0.71641	0.7152	0.72378	0.71752	0.74772	0.72797	0.73176	0.73502	0.71693	0.73167	0.72509	0.71888	0.7164	0.71551	0.73572	0.71398	0.72596	0.73702	0.74257	0.71178	0.7534	0.71905	0.72011	0.71705	0.7163	0.75742	0.72744	0.75964	0.72371	0.69124	0.70545	0.69782	0.72037	0.67525	0.72091	0.72572	0.71639	0.69205	0.68579	0.69684	0.76061	0.71935	0.71852	0.72163	0.76501	0.70326	0.71402	0.71777
GDSC_ocily19	0.8034	0.72339	0.72493	0.73433	0.7249	0.76483	0.7385	0.74239	0.74021	0.71788	0.73767	0.72888	0.72487	0.72091	0.73035	0.74213	0.71836	0.74469	0.74459	0.76099	0.71059	0.77735	0.7244	0.73425	0.72486	0.73278	0.78714	0.73324	0.7898	0.74308	0.69712	0.71777	0.7001	0.72304	0.68306	0.72792	0.72842	0.7187	0.69315	0.68799	0.69444	0.8072	0.72769	0.73271	0.73129	0.80697	0.7087	0.72148	0.72276
GDSC_ocim1	0.74443	0.71648	0.72408	0.73258	0.72877	0.75612	0.73635	0.73699	0.73643	0.71933	0.73249	0.73879	0.7231	0.72082	0.72833	0.73827	0.71131	0.7447	0.74498	0.75083	0.71896	0.76648	0.72331	0.73037	0.72274	0.7284	0.75824	0.7334	0.76189	0.73358	0.70072	0.71125	0.71469	0.72624	0.68698	0.72669	0.72792	0.73177	0.70011	0.69426	0.69951	0.74827	0.7249	0.7242	0.72723	0.75837	0.70884	0.72316	0.72365
GDSC_ocum1	0.66226	0.74128	0.79806	0.72894	0.69367	0.72169	0.74741	0.74003	0.72544	0.70588	0.71822	0.70522	0.70446	0.6992	0.69141	0.71061	0.73375	0.6874	0.71585	0.68893	0.725	0.6975	0.73892	0.68232	0.72671	0.77549	0.65689	0.70086	0.68775	0.69191	0.8147	0.74293	0.70042	0.70105	0.72472	0.76154	0.70996	0.73947	0.72879	0.75101	0.74205	0.6666	0.74439	0.74145	0.70507	0.67102	0.76321	0.76874	0.69944
GDSC_oe19	0.68614	0.75321	0.81738	0.75644	0.70452	0.74106	0.75641	0.7488	0.74067	0.71514	0.73089	0.7122	0.72039	0.71516	0.70874	0.73117	0.75026	0.70741	0.73439	0.71179	0.74088	0.71356	0.75362	0.70207	0.72879	0.7959	0.6777	0.71241	0.7085	0.71812	0.78948	0.77661	0.70427	0.71569	0.74017	0.76726	0.7182	0.73745	0.7376	0.74782	0.7473	0.68874	0.77184	0.77221	0.72294	0.69147	0.77175	0.78794	0.71139
GDSC_oe33	0.71553	0.81608	0.80638	0.76814	0.7517	0.79125	0.82022	0.79427	0.79378	0.76835	0.79183	0.76375	0.7667	0.76382	0.74711	0.77478	0.8017	0.74329	0.77541	0.73858	0.77724	0.74218	0.79151	0.73511	0.78883	0.80117	0.70361	0.76925	0.73422	0.74602	0.80991	0.78523	0.75438	0.76295	0.74035	0.821	0.77247	0.78875	0.79515	0.79649	0.79779	0.71828	0.79661	0.77786	0.76747	0.72044	0.81827	0.80019	0.75328
GDSC_ons76	0.71251	0.78535	0.74484	0.74737	0.77684	0.77803	0.77788	0.77713	0.77972	0.78605	0.78822	0.78791	0.77381	0.78509	0.7541	0.78125	0.77967	0.75491	0.78998	0.72428	0.77437	0.72798	0.77154	0.7492	0.77013	0.7513	0.69514	0.77548	0.71759	0.75091	0.73728	0.74073	0.77847	0.79256	0.71577	0.79217	0.77266	0.7797	0.77445	0.75203	0.77469	0.69599	0.759	0.7502	0.77711	0.70287	0.7756	0.75045	0.76946
GDSC_opm2	0.7597	0.73137	0.74052	0.7517	0.73281	0.76969	0.74684	0.75138	0.75119	0.73001	0.74965	0.73673	0.73841	0.73506	0.73313	0.75235	0.72624	0.75035	0.75828	0.78923	0.73073	0.79584	0.74042	0.73715	0.73226	0.73984	0.75576	0.74969	0.80017	0.74599	0.70116	0.73562	0.70591	0.73628	0.70918	0.73001	0.73193	0.72781	0.70018	0.69308	0.70564	0.77231	0.74083	0.74409	0.74222	0.75925	0.71645	0.73614	0.73275
GDSC_osrc2	0.7123	0.78698	0.76052	0.75344	0.77729	0.78557	0.78911	0.82322	0.83241	0.79154	0.79186	0.78782	0.784	0.79146	0.75967	0.78532	0.77113	0.75036	0.78214	0.72517	0.82085	0.72794	0.80483	0.74395	0.81677	0.76575	0.69727	0.78133	0.71998	0.74926	0.75508	0.74748	0.77924	0.7957	0.72874	0.77417	0.79458	0.79081	0.76152	0.75066	0.76925	0.70563	0.76824	0.75154	0.77915	0.70346	0.76673	0.76964	0.7752
GDSC_ov56	0.70163	0.78556	0.73646	0.7241	0.77591	0.7744	0.77615	0.79924	0.80827	0.79991	0.79115	0.7833	0.77709	0.77312	0.74458	0.77369	0.76293	0.73518	0.77108	0.70914	0.79191	0.71084	0.78291	0.73259	0.80048	0.7368	0.68082	0.77416	0.70634	0.72672	0.73647	0.72562	0.78088	0.77998	0.70138	0.77396	0.80937	0.78538	0.75663	0.74926	0.76734	0.68782	0.7543	0.72784	0.78239	0.7007	0.75397	0.74679	0.75822
GDSC_ov7	0.72518	0.80306	0.75836	0.75385	0.81077	0.80822	0.79687	0.80057	0.81443	0.82256	0.82502	0.80475	0.79529	0.8113	0.77382	0.80204	0.78413	0.76217	0.80007	0.73201	0.80101	0.7353	0.80598	0.76126	0.79899	0.76695	0.70913	0.80427	0.72908	0.7587	0.76144	0.74742	0.79449	0.81615	0.72164	0.78927	0.81425	0.79994	0.76989	0.75813	0.78096	0.70991	0.77406	0.75306	0.81723	0.7181	0.77787	0.76866	0.78183
GDSC_ov90	0.70115	0.7592	0.76812	0.7499	0.73505	0.76017	0.76274	0.76705	0.76143	0.74757	0.75525	0.74856	0.74484	0.74187	0.72872	0.75515	0.7494	0.73847	0.75479	0.71909	0.75428	0.72409	0.77044	0.73204	0.75652	0.77808	0.689	0.74219	0.71268	0.73112	0.75593	0.7434	0.72978	0.74367	0.73183	0.76976	0.74395	0.75888	0.7313	0.72973	0.74769	0.69514	0.75237	0.74729	0.74347	0.69444	0.76335	0.79317	0.73787
GDSC_ovcar4	0.72538	0.78818	0.78161	0.77175	0.7604	0.79181	0.80094	0.78939	0.78988	0.76802	0.78225	0.76328	0.76329	0.7656	0.75204	0.77177	0.77855	0.76057	0.77607	0.74102	0.77337	0.73759	0.78222	0.74995	0.78018	0.78587	0.70948	0.75933	0.73393	0.76252	0.7523	0.78228	0.74622	0.7643	0.7281	0.79105	0.77085	0.762	0.7553	0.75712	0.77696	0.7242	0.79474	0.78547	0.77611	0.72284	0.77437	0.79103	0.75342
GDSC_ovcar8	0.70806	0.77904	0.74349	0.75166	0.76873	0.79523	0.79196	0.77499	0.78219	0.77611	0.78862	0.78821	0.76326	0.7798	0.75802	0.77626	0.76744	0.75739	0.77789	0.72503	0.77871	0.72504	0.77978	0.74854	0.78597	0.7449	0.69374	0.76909	0.71638	0.74787	0.7438	0.74095	0.78497	0.76724	0.71324	0.77476	0.78465	0.77612	0.7556	0.75077	0.77181	0.69589	0.76575	0.74433	0.77989	0.70799	0.75517	0.75635	0.74969
GDSC_ovise	0.70091	0.771	0.76491	0.75394	0.73374	0.76847	0.7876	0.78301	0.77544	0.74968	0.76377	0.75187	0.74622	0.75493	0.74011	0.7509	0.76228	0.74117	0.75536	0.71816	0.7724	0.71704	0.77693	0.72641	0.78067	0.76588	0.68632	0.74022	0.71158	0.74209	0.7501	0.76095	0.74365	0.74356	0.72269	0.78312	0.75623	0.75811	0.74991	0.75189	0.76523	0.69531	0.7812	0.76304	0.75252	0.69707	0.75904	0.7718	0.74058
GDSC_ovk18	0.73617	0.75206	0.7582	0.77639	0.75707	0.79979	0.76605	0.76761	0.76591	0.748	0.75897	0.75814	0.75949	0.76691	0.78326	0.77404	0.74794	0.79546	0.78039	0.75888	0.75633	0.74999	0.77478	0.75997	0.75918	0.75791	0.72786	0.75774	0.75226	0.80117	0.72865	0.75284	0.73562	0.75872	0.72458	0.75309	0.75387	0.7452	0.72086	0.71886	0.72698	0.73648	0.76283	0.76094	0.76993	0.734	0.73091	0.7607	0.75375
GDSC_ovtoko	0.71302	0.78153	0.75396	0.73825	0.76135	0.78244	0.78135	0.81037	0.80647	0.77686	0.7853	0.76243	0.7686	0.77355	0.75138	0.77274	0.77137	0.74712	0.77321	0.72698	0.79584	0.72324	0.7954	0.73403	0.80921	0.76181	0.69665	0.76863	0.7224	0.74663	0.75465	0.74878	0.75296	0.76698	0.71127	0.77574	0.78063	0.767	0.7488	0.7417	0.75904	0.70785	0.76824	0.74723	0.77706	0.71109	0.76276	0.76992	0.75401
GDSC_p12ichikawa	0.76553	0.7013	0.70201	0.71442	0.71241	0.74142	0.71762	0.71427	0.71773	0.70018	0.7158	0.71241	0.70065	0.7039	0.71123	0.71616	0.70011	0.72178	0.72277	0.74154	0.69273	0.75221	0.70205	0.71989	0.69637	0.71193	0.80915	0.71237	0.76348	0.72391	0.67645	0.69893	0.68867	0.70735	0.66979	0.70928	0.71175	0.6999	0.67995	0.67051	0.67527	0.76945	0.71206	0.71351	0.70928	0.77514	0.6888	0.69886	0.70434
GDSC_p31fuj	0.74808	0.71449	0.71434	0.71344	0.71204	0.74263	0.72309	0.71928	0.72929	0.71009	0.71866	0.7199	0.71518	0.71192	0.7113	0.72809	0.70264	0.71669	0.72968	0.73401	0.70932	0.75635	0.71402	0.71557	0.70697	0.71349	0.76507	0.72114	0.76257	0.72322	0.68784	0.7073	0.69997	0.71225	0.66562	0.71492	0.71696	0.71099	0.68971	0.68608	0.68879	0.75553	0.71604	0.70751	0.71536	0.76361	0.70714	0.70823	0.70781
GDSC_panc0203	0.69855	0.80808	0.78603	0.74806	0.74339	0.77716	0.80819	0.77868	0.78093	0.76214	0.77493	0.75958	0.75116	0.76062	0.74473	0.75989	0.78123	0.73268	0.7698	0.72368	0.77867	0.72988	0.77973	0.72524	0.77814	0.78226	0.6949	0.75563	0.71774	0.73649	0.80174	0.77473	0.75989	0.75301	0.72669	0.80729	0.76161	0.77499	0.78478	0.79412	0.78972	0.69702	0.79362	0.76276	0.75736	0.70532	0.81052	0.77601	0.7395
GDSC_panc0327	0.71555	0.82399	0.78042	0.75589	0.76453	0.79104	0.82612	0.79031	0.79618	0.78579	0.7998	0.78649	0.77121	0.77477	0.74891	0.77563	0.7933	0.73995	0.77835	0.72771	0.77854	0.73541	0.78702	0.73615	0.79118	0.7888	0.70385	0.77469	0.72513	0.74362	0.79397	0.76804	0.77327	0.76885	0.72198	0.81556	0.78175	0.79343	0.79576	0.79344	0.80153	0.70623	0.79143	0.76693	0.77417	0.7142	0.81716	0.78767	0.75509
GDSC_panc0403	0.68791	0.79301	0.79079	0.74372	0.73066	0.76306	0.79892	0.77009	0.76876	0.74799	0.76115	0.74607	0.74063	0.74668	0.72464	0.74733	0.771	0.71924	0.75164	0.71111	0.76688	0.71519	0.7689	0.71174	0.76902	0.78435	0.68048	0.74287	0.70719	0.72122	0.80455	0.76986	0.74365	0.73727	0.72132	0.79135	0.74864	0.7628	0.77549	0.78639	0.78182	0.68374	0.78502	0.75554	0.74524	0.69579	0.80661	0.77501	0.729
GDSC_panc0813	0.70332	0.81126	0.79582	0.75328	0.75002	0.77896	0.809	0.78176	0.7856	0.77344	0.78852	0.76699	0.75978	0.75558	0.73251	0.76641	0.78411	0.72545	0.76715	0.7213	0.76749	0.73014	0.77586	0.7235	0.77751	0.79692	0.6972	0.76314	0.72264	0.73096	0.80455	0.77369	0.7602	0.7541	0.73183	0.8115	0.76672	0.78813	0.78956	0.78672	0.78855	0.70391	0.78875	0.76718	0.75881	0.70948	0.81597	0.78841	0.74726
GDSC_panc1005	0.70569	0.78127	0.77816	0.74979	0.73184	0.77397	0.80038	0.77205	0.7715	0.74708	0.76672	0.74787	0.74101	0.75243	0.73835	0.75001	0.7625	0.73167	0.75759	0.72578	0.76379	0.73214	0.76646	0.7215	0.76624	0.77538	0.70344	0.74603	0.72472	0.73894	0.77499	0.76981	0.74727	0.73929	0.7191	0.78932	0.75554	0.76215	0.76906	0.77537	0.76738	0.70531	0.78755	0.76152	0.74855	0.7163	0.78395	0.76584	0.73101
GDSC_patu8902	0.71182	0.79621	0.78588	0.7506	0.73509	0.77994	0.79959	0.77599	0.77539	0.74901	0.77662	0.7457	0.743	0.75267	0.74105	0.75672	0.77592	0.73356	0.76357	0.72506	0.76102	0.73478	0.77045	0.72735	0.76822	0.78005	0.71096	0.75267	0.73045	0.73996	0.78489	0.76886	0.74258	0.74473	0.71657	0.79614	0.7537	0.75946	0.77325	0.77206	0.77125	0.71196	0.78507	0.76191	0.75797	0.72004	0.79533	0.77336	0.72883
GDSC_patu8988t	0.74078	0.79696	0.77736	0.77533	0.77543	0.8219	0.81348	0.80252	0.8012	0.78686	0.80849	0.78356	0.77878	0.79242	0.77852	0.79428	0.78118	0.77557	0.79561	0.75778	0.78521	0.75304	0.80034	0.76286	0.79862	0.78692	0.72749	0.78431	0.75405	0.78035	0.77009	0.76587	0.76985	0.78058	0.73596	0.79384	0.79106	0.78238	0.76348	0.75919	0.77563	0.73685	0.78871	0.77992	0.79251	0.73755	0.77633	0.79205	0.77256
GDSC_pc14	0.70372	0.79885	0.77849	0.75584	0.74952	0.77838	0.81076	0.78033	0.78206	0.76587	0.77982	0.76608	0.75787	0.76871	0.74593	0.7663	0.78439	0.73688	0.77145	0.72639	0.78591	0.73094	0.78803	0.73478	0.77718	0.77439	0.69436	0.75495	0.72166	0.74708	0.77795	0.78524	0.76317	0.76447	0.73028	0.80298	0.77011	0.77572	0.77862	0.78114	0.79142	0.69979	0.81036	0.77241	0.76842	0.70776	0.79606	0.77481	0.74524
GDSC_pc3	0.70798	0.81297	0.77367	0.76923	0.76936	0.79819	0.80259	0.78223	0.79104	0.78667	0.79535	0.7716	0.77074	0.77789	0.75433	0.78003	0.77911	0.74772	0.78626	0.72736	0.77796	0.72835	0.78598	0.74375	0.77963	0.77233	0.6954	0.77687	0.71985	0.75536	0.76704	0.77071	0.76807	0.77897	0.72692	0.79704	0.77049	0.77621	0.76751	0.76309	0.77663	0.69998	0.78518	0.77346	0.78412	0.70313	0.79366	0.77622	0.75714
GDSC_pecapj15	0.71943	0.82139	0.78763	0.7661	0.76492	0.79562	0.82204	0.79024	0.79771	0.77779	0.79397	0.77559	0.77179	0.77929	0.75855	0.7817	0.82867	0.74667	0.78543	0.73558	0.78852	0.74046	0.79793	0.74215	0.79008	0.79002	0.70763	0.77044	0.73204	0.75008	0.78555	0.78218	0.76564	0.7772	0.73019	0.82977	0.78365	0.78235	0.81192	0.81414	0.81676	0.71456	0.80943	0.77716	0.77943	0.7181	0.81912	0.78635	0.75964
GDSC_pf382	0.77868	0.73323	0.72521	0.74482	0.73626	0.77452	0.74478	0.74184	0.74259	0.72756	0.74533	0.73729	0.7301	0.73356	0.73995	0.7452	0.72615	0.75121	0.75179	0.75922	0.71757	0.76305	0.73362	0.75097	0.72833	0.73331	0.80441	0.74028	0.77104	0.75351	0.69462	0.72261	0.71385	0.73573	0.69515	0.73012	0.73242	0.71837	0.6997	0.69191	0.70121	0.77451	0.74031	0.74033	0.74061	0.77761	0.71334	0.72585	0.72756
GDSC_pl21	0.75806	0.7199	0.72614	0.72717	0.72105	0.75144	0.73405	0.73614	0.74033	0.71849	0.73424	0.72651	0.72471	0.71612	0.71779	0.73789	0.71532	0.72365	0.7344	0.74829	0.7131	0.7632	0.72179	0.72095	0.71818	0.72545	0.77159	0.72898	0.76804	0.72579	0.6978	0.71759	0.69595	0.72111	0.67739	0.72459	0.72989	0.71909	0.69601	0.69353	0.69812	0.77136	0.7262	0.72057	0.72648	0.7715	0.71555	0.72192	0.72073
GDSC_psn1	0.71268	0.78292	0.76245	0.74703	0.76604	0.78911	0.7788	0.77863	0.78093	0.78193	0.78488	0.78017	0.76935	0.77042	0.7521	0.77808	0.76682	0.74556	0.78701	0.72947	0.76893	0.73285	0.78481	0.7372	0.7723	0.76272	0.69896	0.77041	0.72704	0.74107	0.7765	0.74513	0.77966	0.77285	0.72672	0.79177	0.77431	0.79968	0.76005	0.75103	0.76101	0.70755	0.76081	0.7447	0.76746	0.71164	0.77886	0.76521	0.7571
GDSC_qgp1	0.67893	0.73326	0.74959	0.75525	0.71194	0.7421	0.74627	0.73973	0.73653	0.72753	0.72996	0.73561	0.72821	0.72886	0.71468	0.73632	0.72887	0.71529	0.73821	0.70545	0.73188	0.70645	0.73957	0.71497	0.73584	0.73084	0.66221	0.72049	0.70129	0.71491	0.72501	0.73128	0.72761	0.73179	0.77642	0.75028	0.72696	0.74583	0.71654	0.71295	0.72484	0.67987	0.73523	0.7437	0.72092	0.67698	0.72788	0.7378	0.73039
GDSC_raji	0.72967	0.68349	0.69023	0.68897	0.68593	0.71552	0.6984	0.69874	0.70472	0.67747	0.68742	0.69855	0.68896	0.68699	0.6866	0.69344	0.67604	0.69608	0.70013	0.72667	0.68443	0.74271	0.68561	0.68328	0.68326	0.68906	0.73939	0.69187	0.75778	0.69811	0.6681	0.68393	0.67722	0.68169	0.65067	0.68791	0.69092	0.6886	0.66241	0.67331	0.6637	0.78232	0.69021	0.68684	0.68655	0.74708	0.67747	0.6808	0.68482
GDSC_rcc10rgb	0.6943	0.76888	0.7312	0.72365	0.75751	0.76751	0.76959	0.80482	0.81382	0.77281	0.7738	0.7495	0.75134	0.77651	0.73732	0.75621	0.74676	0.72364	0.75783	0.70031	0.79956	0.70286	0.77632	0.72383	0.79816	0.73708	0.67868	0.75429	0.69965	0.7323	0.73563	0.73418	0.75792	0.76902	0.6989	0.75107	0.7798	0.75475	0.7402	0.73933	0.7531	0.68026	0.75918	0.73299	0.7725	0.69589	0.74582	0.74254	0.73843
GDSC_rchacv	0.82826	0.72445	0.71191	0.72857	0.72763	0.75709	0.73349	0.73404	0.73711	0.72561	0.73628	0.72774	0.72019	0.72348	0.72957	0.74143	0.71696	0.74012	0.74241	0.74474	0.71421	0.75285	0.72072	0.74017	0.72078	0.72337	0.77587	0.73027	0.76892	0.73838	0.6879	0.70907	0.70668	0.72924	0.67991	0.72184	0.73094	0.71524	0.69011	0.68434	0.69716	0.78109	0.72442	0.73012	0.73168	0.80091	0.70221	0.71411	0.72293
GDSC_rcm1	0.70615	0.78295	0.812	0.76022	0.73093	0.77225	0.79013	0.77086	0.76719	0.74126	0.76052	0.74919	0.74492	0.74019	0.72944	0.75095	0.7738	0.72895	0.75813	0.72868	0.75957	0.73845	0.7686	0.72043	0.76206	0.79892	0.70003	0.74349	0.72934	0.73291	0.81693	0.77461	0.73479	0.73883	0.74164	0.79684	0.74887	0.77383	0.76507	0.77738	0.77328	0.70828	0.78143	0.76823	0.7422	0.71343	0.79051	0.80165	0.73426
GDSC_rd	0.71463	0.74704	0.70276	0.72654	0.76884	0.77291	0.74483	0.74863	0.75989	0.76087	0.76041	0.76999	0.76023	0.77355	0.75159	0.76929	0.7346	0.76261	0.77375	0.71248	0.74937	0.71535	0.74802	0.75597	0.75347	0.71532	0.69184	0.75541	0.70979	0.75164	0.70042	0.70474	0.74899	0.77304	0.69401	0.73964	0.75958	0.7475	0.7087	0.69562	0.72279	0.69148	0.72641	0.7229	0.76898	0.69859	0.71442	0.72634	0.758
GDSC_reh	0.80935	0.72125	0.70818	0.72337	0.72347	0.7558	0.72917	0.73006	0.73097	0.71736	0.72943	0.71988	0.71543	0.72079	0.72768	0.73533	0.71056	0.73982	0.74017	0.74501	0.70954	0.754	0.71729	0.74469	0.71511	0.71978	0.79001	0.72639	0.77042	0.74193	0.68632	0.7092	0.70161	0.72308	0.67773	0.71743	0.71833	0.70345	0.68612	0.68129	0.68932	0.78846	0.72553	0.72658	0.73069	0.80347	0.70124	0.71089	0.71461
GDSC_rerflcms	0.713	0.78757	0.756	0.75569	0.78237	0.79703	0.78499	0.78857	0.79774	0.79346	0.79827	0.7913	0.78608	0.8045	0.78118	0.79514	0.77938	0.76562	0.79822	0.73305	0.80331	0.73145	0.81077	0.75653	0.78505	0.75309	0.69763	0.77928	0.7223	0.76705	0.75308	0.75091	0.79032	0.80632	0.72732	0.78148	0.78991	0.78848	0.76104	0.75049	0.77233	0.69991	0.77764	0.74927	0.79888	0.70622	0.76513	0.75731	0.77649
GDSC_rh18	0.70554	0.72243	0.69017	0.71016	0.75162	0.75068	0.71865	0.73011	0.73567	0.72891	0.73359	0.73335	0.73047	0.74556	0.73485	0.74493	0.71551	0.7437	0.74704	0.6962	0.72627	0.69621	0.73097	0.7398	0.72694	0.70702	0.68735	0.72863	0.69639	0.74822	0.67807	0.69704	0.7093	0.75064	0.66721	0.71012	0.7374	0.7072	0.6804	0.67074	0.7009	0.68576	0.71558	0.71946	0.75266	0.69277	0.69182	0.71848	0.72662
GDSC_rh41	0.71963	0.72534	0.69635	0.72698	0.75577	0.75635	0.72835	0.73698	0.7378	0.74313	0.74779	0.74511	0.73729	0.74903	0.74019	0.7545	0.72352	0.75043	0.75608	0.70888	0.7227	0.70628	0.7309	0.74668	0.73211	0.70826	0.69601	0.74124	0.70592	0.74539	0.67283	0.69424	0.72195	0.758	0.68971	0.71934	0.74001	0.71986	0.68729	0.67069	0.70472	0.70033	0.71711	0.72743	0.7485	0.69672	0.68974	0.71817	0.74395
GDSC_rkn	0.72773	0.80324	0.74686	0.74291	0.79945	0.80594	0.78885	0.79773	0.81249	0.82889	0.81657	0.78926	0.79121	0.79966	0.76924	0.79714	0.77517	0.75714	0.79993	0.73438	0.79235	0.73528	0.7902	0.75734	0.7957	0.75393	0.71355	0.80398	0.73118	0.75945	0.74756	0.73912	0.80301	0.79995	0.70997	0.78031	0.81057	0.78535	0.7648	0.74919	0.76841	0.71545	0.76857	0.74514	0.80021	0.7218	0.76483	0.75694	0.77228
GDSC_rko	0.7377	0.7791	0.77443	0.76754	0.75958	0.81273	0.78485	0.78069	0.78482	0.76724	0.77931	0.75979	0.76384	0.76766	0.76602	0.77836	0.7579	0.76937	0.78389	0.75535	0.77011	0.75766	0.77386	0.7507	0.77087	0.78025	0.72979	0.76999	0.75634	0.77628	0.7566	0.75334	0.75029	0.76793	0.72591	0.77578	0.76703	0.76383	0.74106	0.74548	0.74313	0.74028	0.7696	0.76138	0.77254	0.74146	0.75826	0.77067	0.75822
GDSC_rl	0.75591	0.69891	0.71122	0.71861	0.70114	0.73432	0.71612	0.71499	0.71824	0.68859	0.70562	0.70699	0.701	0.70014	0.70684	0.71263	0.68974	0.71886	0.71696	0.7463	0.69345	0.76227	0.70255	0.70516	0.69852	0.71125	0.7676	0.70705	0.7816	0.72513	0.68113	0.70049	0.685	0.69633	0.67232	0.70392	0.70327	0.69798	0.67641	0.67999	0.67688	0.81566	0.71012	0.71303	0.70286	0.77114	0.68677	0.7012	0.69822
GDSC_rl952	0.72992	0.79173	0.78605	0.77412	0.75904	0.7928	0.80851	0.78382	0.78312	0.75895	0.78455	0.75984	0.759	0.76437	0.75887	0.77149	0.79783	0.76694	0.77501	0.74023	0.77234	0.74323	0.78061	0.74455	0.77268	0.78378	0.715	0.76299	0.73662	0.77084	0.75365	0.78752	0.74153	0.76427	0.72372	0.8021	0.77063	0.761	0.77905	0.77625	0.7856	0.72508	0.80713	0.78893	0.77434	0.72558	0.78753	0.78092	0.7567
GDSC_rmgi	0.68789	0.75907	0.75181	0.74016	0.72313	0.75605	0.76898	0.76879	0.76324	0.74032	0.74489	0.73899	0.73271	0.73765	0.72318	0.74104	0.73532	0.7232	0.74218	0.70893	0.76021	0.7079	0.75472	0.71485	0.76526	0.74894	0.67734	0.72399	0.70252	0.72673	0.74142	0.74267	0.74089	0.73074	0.71842	0.76049	0.74414	0.74656	0.73136	0.7387	0.74625	0.68493	0.76099	0.74889	0.73808	0.69156	0.74272	0.75729	0.72578
GDSC_rpmi7951	0.7115	0.78495	0.7312	0.72852	0.8133	0.79257	0.77826	0.77809	0.8004	0.81582	0.79709	0.80697	0.80423	0.80455	0.77311	0.79857	0.75923	0.75579	0.80431	0.72218	0.78913	0.7303	0.78077	0.75652	0.78049	0.73592	0.69694	0.79184	0.72192	0.75395	0.73417	0.7316	0.81208	0.80831	0.70406	0.76781	0.81921	0.79101	0.76015	0.74635	0.76543	0.69605	0.7573	0.72846	0.80288	0.71609	0.7565	0.74227	0.78113
GDSC_rpmi8226	0.74131	0.72231	0.734	0.7337	0.71315	0.74335	0.73848	0.73176	0.73681	0.7098	0.72436	0.7257	0.71969	0.71617	0.7122	0.73125	0.71416	0.72104	0.73739	0.76478	0.71765	0.78553	0.7226	0.71457	0.71926	0.72297	0.74611	0.72129	0.79112	0.72469	0.70445	0.73014	0.70355	0.7169	0.70572	0.72796	0.71902	0.72525	0.70219	0.70219	0.70145	0.76852	0.7323	0.73351	0.72043	0.75487	0.71481	0.72024	0.71459
GDSC_rpmi8402	0.77763	0.71688	0.71383	0.73717	0.72847	0.76021	0.73533	0.72972	0.73142	0.71685	0.73532	0.73217	0.71414	0.7212	0.73119	0.73135	0.71075	0.74645	0.74156	0.75352	0.70751	0.76153	0.71959	0.73806	0.71581	0.72315	0.80953	0.73117	0.76466	0.73954	0.68578	0.71001	0.70815	0.72665	0.68241	0.72145	0.72321	0.717	0.68555	0.67924	0.68848	0.76949	0.72419	0.73274	0.72777	0.77287	0.69958	0.71318	0.71406
GDSC_rs411	0.80839	0.72109	0.71635	0.7261	0.72059	0.75525	0.72993	0.72873	0.73353	0.71568	0.72737	0.72296	0.71722	0.71421	0.72311	0.73433	0.7091	0.73542	0.7407	0.75193	0.70956	0.76539	0.71569	0.73243	0.71195	0.72238	0.7868	0.72739	0.77915	0.73837	0.6862	0.71207	0.69916	0.71867	0.67403	0.71987	0.72231	0.70878	0.68822	0.68262	0.68811	0.7946	0.72194	0.72392	0.72639	0.81316	0.70392	0.7126	0.71708
GDSC_rt112	0.70729	0.78996	0.78518	0.75942	0.74497	0.76854	0.79424	0.767	0.76411	0.75249	0.76911	0.75341	0.74661	0.74789	0.7356	0.75576	0.78776	0.73306	0.76428	0.72568	0.75695	0.73191	0.76265	0.73156	0.7526	0.77992	0.70273	0.7458	0.72058	0.74022	0.77147	0.77756	0.74769	0.75468	0.72517	0.81386	0.75389	0.76333	0.78724	0.7842	0.79041	0.706	0.79566	0.77965	0.7496	0.7086	0.8017	0.772	0.7428
GDSC_rt4	0.70426	0.78316	0.77461	0.75861	0.73403	0.7632	0.78986	0.76321	0.75845	0.74691	0.75934	0.74896	0.74416	0.73846	0.72542	0.74922	0.76952	0.72742	0.7526	0.72114	0.74857	0.72505	0.76022	0.7208	0.7541	0.77481	0.69677	0.73974	0.71396	0.73086	0.76128	0.76915	0.74116	0.74358	0.72372	0.79933	0.74351	0.75797	0.76813	0.76549	0.77253	0.70269	0.78354	0.78061	0.73903	0.69847	0.78613	0.7711	0.74246
GDSC_rvh421	0.69628	0.74412	0.71888	0.72339	0.74631	0.75825	0.74584	0.75163	0.75442	0.75403	0.75176	0.75184	0.79649	0.75433	0.74232	0.79899	0.726	0.73687	0.78552	0.70837	0.75287	0.70727	0.74936	0.72586	0.7482	0.71825	0.67557	0.74725	0.70698	0.73923	0.71133	0.71492	0.74517	0.75455	0.69476	0.7321	0.75029	0.74197	0.71275	0.70907	0.72283	0.68504	0.72798	0.72129	0.75114	0.69141	0.71828	0.72692	0.80757
GDSC_saos2	0.71781	0.76171	0.71853	0.74379	0.78378	0.78607	0.76025	0.75692	0.77688	0.77547	0.7686	0.77965	0.76865	0.77895	0.75751	0.78189	0.74576	0.76342	0.7802	0.72473	0.76219	0.72142	0.76023	0.75541	0.75552	0.7299	0.69841	0.75939	0.71453	0.76326	0.70493	0.72895	0.75454	0.78571	0.71238	0.74242	0.77159	0.75238	0.71811	0.70695	0.73356	0.70038	0.74158	0.737	0.78281	0.70221	0.72562	0.74667	0.76258
GDSC_sbc5	0.73655	0.74899	0.74851	0.77283	0.75024	0.79486	0.76217	0.76492	0.76696	0.74638	0.75695	0.75563	0.75547	0.76535	0.77822	0.77219	0.74992	0.79341	0.77772	0.75632	0.75587	0.74341	0.7736	0.7597	0.75893	0.74892	0.72296	0.75633	0.74924	0.79203	0.72017	0.74426	0.73458	0.76038	0.7256	0.75101	0.75103	0.74333	0.71902	0.71206	0.72917	0.73393	0.76054	0.75313	0.7668	0.7303	0.72773	0.75526	0.75189
GDSC_scaber	0.68682	0.80229	0.76391	0.72656	0.75104	0.76375	0.79809	0.76388	0.77483	0.76683	0.77381	0.76318	0.74969	0.75174	0.7259	0.75416	0.8082	0.71659	0.75756	0.70269	0.76388	0.71236	0.76238	0.70974	0.76203	0.7605	0.67369	0.75513	0.70095	0.71523	0.76346	0.753	0.76252	0.75948	0.70153	0.82361	0.77557	0.77743	0.83486	0.82893	0.81812	0.68094	0.77588	0.74354	0.75555	0.69246	0.8154	0.75031	0.74266
GDSC_scc25	0.6804	0.79104	0.75017	0.71654	0.74504	0.75283	0.78795	0.75382	0.76488	0.76005	0.7643	0.75648	0.74234	0.75096	0.71932	0.74328	0.79596	0.7093	0.7468	0.69344	0.7598	0.70514	0.75511	0.71397	0.75415	0.75141	0.66883	0.7399	0.6938	0.71183	0.75613	0.74471	0.76478	0.75597	0.69842	0.81089	0.76633	0.76722	0.81004	0.81651	0.81193	0.66973	0.77134	0.7374	0.74643	0.68675	0.80398	0.74391	0.73206
GDSC_scc4	0.68855	0.80218	0.7665	0.74045	0.75091	0.76505	0.79282	0.76167	0.76981	0.76157	0.76934	0.76048	0.75112	0.7553	0.7353	0.75707	0.80993	0.73032	0.76269	0.70535	0.76292	0.71448	0.76689	0.72925	0.76063	0.75923	0.67522	0.75002	0.70126	0.72892	0.7623	0.75938	0.75712	0.76148	0.71118	0.8236	0.76193	0.76539	0.80606	0.8104	0.8181	0.68054	0.77927	0.75601	0.75831	0.68798	0.81876	0.76002	0.74036
GDSC_scc9	0.68157	0.80374	0.75959	0.72602	0.74571	0.7622	0.80105	0.75718	0.77113	0.76547	0.7681	0.75812	0.74663	0.74948	0.7288	0.75052	0.79481	0.71409	0.75309	0.70188	0.76178	0.70857	0.76166	0.71216	0.75435	0.75604	0.6749	0.74573	0.69554	0.72032	0.75475	0.75815	0.76444	0.75477	0.69824	0.81459	0.76742	0.77199	0.82105	0.82158	0.81337	0.67394	0.77818	0.74348	0.75761	0.68602	0.80634	0.75102	0.7339
GDSC_sf126	0.71929	0.78006	0.7331	0.7394	0.8248	0.79448	0.78005	0.78052	0.79759	0.81411	0.80761	0.81429	0.79439	0.81753	0.77097	0.79635	0.76739	0.75951	0.79895	0.72319	0.79319	0.73225	0.77875	0.76194	0.78484	0.74338	0.7034	0.79759	0.71907	0.75892	0.73352	0.73086	0.80108	0.82617	0.70878	0.76541	0.8092	0.78798	0.75923	0.73793	0.76522	0.69746	0.75951	0.73803	0.79833	0.71479	0.75221	0.74342	0.78806
GDSC_sf295	0.70231	0.7713	0.72814	0.73007	0.79328	0.77762	0.76418	0.77596	0.78947	0.79015	0.78132	0.7887	0.78497	0.80432	0.75968	0.78393	0.75318	0.74781	0.78754	0.71301	0.79047	0.72256	0.77082	0.74634	0.7716	0.73173	0.69106	0.77481	0.71254	0.7506	0.73015	0.72681	0.78395	0.81453	0.70361	0.75476	0.78828	0.77366	0.73966	0.7353	0.75206	0.68617	0.74912	0.72714	0.78901	0.70144	0.7482	0.7328	0.7725
GDSC_sh4	0.73043	0.75114	0.74417	0.75258	0.75749	0.78385	0.76628	0.76926	0.7679	0.76196	0.7665	0.77036	0.8006	0.77174	0.76441	0.81363	0.74344	0.76536	0.80174	0.73781	0.76365	0.73726	0.76189	0.75025	0.76208	0.74363	0.71285	0.76242	0.74195	0.76755	0.72878	0.73671	0.74975	0.7647	0.71764	0.74907	0.76438	0.75638	0.72514	0.72068	0.73081	0.71853	0.74838	0.7477	0.75915	0.72766	0.72754	0.74582	0.81754
GDSC_shp77	0.68706	0.70901	0.71909	0.74253	0.7126	0.74231	0.72119	0.72222	0.72086	0.71481	0.72043	0.7344	0.71728	0.7248	0.71854	0.73058	0.70736	0.72177	0.73913	0.70823	0.7139	0.70946	0.72456	0.72238	0.71515	0.70684	0.67877	0.71735	0.70874	0.72255	0.68996	0.70723	0.71537	0.72533	0.75556	0.7162	0.71251	0.7259	0.68453	0.67858	0.69322	0.68709	0.7107	0.72545	0.71988	0.68175	0.69215	0.71011	0.71681
GDSC_sigm5	0.75284	0.71987	0.72156	0.72176	0.71645	0.75064	0.72576	0.73388	0.73449	0.70971	0.72636	0.71081	0.72239	0.71133	0.71905	0.73496	0.71276	0.72877	0.73921	0.74774	0.71302	0.75709	0.72288	0.72148	0.71508	0.72002	0.76026	0.72098	0.7683	0.72947	0.69611	0.71982	0.69231	0.71139	0.67179	0.71951	0.72015	0.70908	0.68463	0.6893	0.69301	0.76579	0.72313	0.7181	0.7282	0.77082	0.71085	0.72142	0.70999
GDSC_sima	0.70926	0.70266	0.6885	0.73286	0.71043	0.74651	0.70553	0.71313	0.71415	0.70662	0.71146	0.71036	0.70671	0.72054	0.72235	0.72604	0.68599	0.74112	0.73477	0.70429	0.69892	0.69491	0.71418	0.73438	0.70413	0.69319	0.6937	0.71001	0.70345	0.73399	0.65798	0.68725	0.6995	0.71958	0.70629	0.69742	0.70563	0.69502	0.6568	0.64727	0.66778	0.69396	0.69691	0.71193	0.72237	0.69198	0.6655	0.70042	0.70352
GDSC_sjsa1	0.71359	0.76653	0.72587	0.72724	0.79268	0.77374	0.7682	0.76971	0.7832	0.79179	0.78542	0.80014	0.78543	0.78966	0.75514	0.79036	0.75755	0.75105	0.78178	0.71275	0.77519	0.72244	0.76887	0.75283	0.7755	0.72906	0.69538	0.778	0.71136	0.73878	0.72632	0.71354	0.78139	0.8025	0.69901	0.76029	0.79616	0.77743	0.74545	0.73486	0.76041	0.69328	0.73726	0.72535	0.77672	0.7055	0.74058	0.736	0.77791
GDSC_skco1	0.73335	0.79284	0.78235	0.77923	0.76322	0.8027	0.8021	0.78362	0.78212	0.76871	0.78754	0.77288	0.76734	0.76614	0.7598	0.78099	0.8038	0.76707	0.78625	0.75546	0.7681	0.75608	0.78391	0.75452	0.77301	0.77853	0.71911	0.76787	0.75145	0.76401	0.7508	0.76189	0.75831	0.76975	0.741	0.81321	0.7722	0.77576	0.77605	0.77583	0.78412	0.7336	0.78433	0.78306	0.77554	0.72823	0.77945	0.78251	0.76395
GDSC_skes1	0.73493	0.72836	0.71714	0.75705	0.74999	0.77254	0.74114	0.73574	0.74258	0.73662	0.7463	0.74806	0.73702	0.74882	0.74681	0.75784	0.72468	0.7703	0.76357	0.73295	0.72695	0.7328	0.7432	0.82751	0.73818	0.71945	0.71867	0.74378	0.72487	0.75856	0.68549	0.71198	0.72527	0.75531	0.70484	0.73077	0.73649	0.72595	0.69285	0.68182	0.7073	0.71991	0.72553	0.73626	0.7562	0.72049	0.69913	0.7273	0.73878
GDSC_skhep1	0.70199	0.79022	0.73077	0.72749	0.77658	0.78716	0.7835	0.78133	0.7937	0.80269	0.80444	0.7764	0.78238	0.78741	0.75481	0.78329	0.75629	0.74056	0.78247	0.71486	0.78303	0.71541	0.78769	0.73788	0.79466	0.73427	0.68429	0.79308	0.71447	0.74072	0.74013	0.72286	0.79067	0.77735	0.69849	0.76691	0.793	0.77916	0.75516	0.74527	0.76119	0.69033	0.74858	0.72538	0.78678	0.70534	0.75258	0.74571	0.76032
GDSC_sklms1	0.72682	0.79569	0.74165	0.75123	0.81455	0.8141	0.79106	0.78836	0.8068	0.82934	0.82506	0.80579	0.79484	0.80862	0.77277	0.79917	0.76693	0.76593	0.80056	0.73351	0.78514	0.74072	0.78506	0.76505	0.79399	0.74919	0.7155	0.81777	0.73128	0.7647	0.74253	0.73074	0.80963	0.81943	0.7111	0.77598	0.81125	0.80003	0.76206	0.74282	0.766	0.71281	0.75845	0.74417	0.80448	0.7216	0.76045	0.74908	0.78213
GDSC_sklu1	0.7069	0.79129	0.73054	0.73294	0.78473	0.79108	0.77935	0.77823	0.79794	0.79419	0.78251	0.78385	0.77891	0.78682	0.76217	0.77953	0.75409	0.74964	0.7896	0.72116	0.78948	0.73031	0.77939	0.74443	0.77972	0.73934	0.69759	0.77637	0.72	0.75667	0.74313	0.73622	0.78164	0.78386	0.69904	0.76387	0.79103	0.76866	0.7501	0.74186	0.7527	0.69647	0.75993	0.73246	0.794	0.70864	0.76186	0.74277	0.76143
GDSC_skm1	0.75856	0.73419	0.72425	0.73373	0.72725	0.76007	0.73928	0.73969	0.74596	0.72997	0.73891	0.7408	0.72947	0.72747	0.72626	0.74906	0.72723	0.73842	0.74819	0.74872	0.72731	0.75134	0.73069	0.72966	0.72885	0.72234	0.75173	0.73319	0.75745	0.73607	0.70277	0.71844	0.71501	0.72935	0.68935	0.73664	0.73879	0.73254	0.70427	0.69885	0.71028	0.75331	0.72958	0.7282	0.73327	0.76567	0.71405	0.7281	0.7237
GDSC_skmel1	0.72505	0.76555	0.73641	0.75305	0.76138	0.78155	0.77055	0.76991	0.77611	0.76735	0.76924	0.77085	0.80211	0.76733	0.75571	0.80925	0.74549	0.75254	0.80189	0.73416	0.76084	0.7293	0.76614	0.74916	0.76613	0.74093	0.70572	0.76324	0.73193	0.75692	0.72238	0.73567	0.74341	0.76957	0.72265	0.7521	0.76334	0.75356	0.72213	0.71253	0.73701	0.71427	0.7498	0.7475	0.76493	0.71444	0.73389	0.7569	0.81064
GDSC_skmel2	0.71575	0.75037	0.73737	0.74277	0.7542	0.77074	0.75933	0.76154	0.76573	0.76035	0.76784	0.7709	0.80494	0.76495	0.74975	0.80604	0.737	0.74471	0.8011	0.73526	0.75317	0.74133	0.75732	0.73714	0.7554	0.73822	0.70446	0.76628	0.73021	0.74921	0.7156	0.73471	0.74752	0.76083	0.708	0.74415	0.75797	0.75436	0.72313	0.71217	0.72541	0.71366	0.74502	0.73464	0.75566	0.71056	0.72949	0.74002	0.80543
GDSC_skmel24	0.70035	0.75705	0.71903	0.72267	0.77038	0.76476	0.75604	0.76393	0.7729	0.77688	0.77443	0.76563	0.8223	0.77732	0.74694	0.81566	0.74017	0.73256	0.80612	0.70653	0.7658	0.70969	0.75766	0.73754	0.76208	0.72129	0.67959	0.77344	0.70722	0.73693	0.71188	0.71703	0.75599	0.77872	0.6958	0.73704	0.76633	0.74614	0.72411	0.7122	0.73473	0.68626	0.73431	0.71856	0.76915	0.69422	0.73007	0.72593	0.8138
GDSC_skmel28	0.7161	0.75402	0.73535	0.74476	0.76322	0.77838	0.76102	0.76562	0.77349	0.76798	0.77067	0.77226	0.81144	0.76826	0.76162	0.81216	0.74758	0.75155	0.80027	0.7325	0.76647	0.7345	0.76242	0.74382	0.76272	0.73547	0.69937	0.76415	0.73013	0.75457	0.71969	0.73044	0.75181	0.76997	0.71338	0.74571	0.76939	0.75469	0.72673	0.7202	0.7361	0.70746	0.74965	0.73758	0.7621	0.71332	0.73177	0.74164	0.81758
GDSC_skmel3	0.72897	0.76291	0.73667	0.74653	0.7687	0.78244	0.76309	0.76656	0.77412	0.7661	0.76845	0.7644	0.80379	0.76792	0.76082	0.80936	0.74622	0.75639	0.80414	0.73793	0.76838	0.7386	0.7625	0.75263	0.76031	0.73876	0.71089	0.76392	0.74107	0.76684	0.71782	0.73682	0.74862	0.77132	0.71274	0.74479	0.76127	0.74827	0.72049	0.71332	0.73062	0.72051	0.75097	0.74601	0.77086	0.72316	0.7337	0.74541	0.80764
GDSC_skmel30	0.73289	0.77126	0.75494	0.75557	0.77254	0.7922	0.78143	0.77861	0.78297	0.77513	0.78285	0.78788	0.8159	0.77794	0.76684	0.82601	0.76028	0.76523	0.8099	0.74399	0.77196	0.747	0.77384	0.75394	0.77445	0.75478	0.7194	0.77719	0.74712	0.76958	0.7398	0.74276	0.76505	0.77623	0.72106	0.76837	0.77702	0.77136	0.74589	0.7424	0.74818	0.72689	0.75929	0.75204	0.77279	0.73003	0.74763	0.75903	0.82013
GDSC_skmel31	0.68387	0.74117	0.70496	0.71068	0.76529	0.74791	0.74439	0.75165	0.76049	0.76488	0.76047	0.77075	0.81592	0.77472	0.73891	0.79759	0.72735	0.71959	0.79303	0.69479	0.76424	0.70597	0.74389	0.72578	0.75288	0.7086	0.6656	0.75643	0.69406	0.7286	0.70572	0.70678	0.75657	0.77627	0.68968	0.72635	0.7626	0.74734	0.71548	0.70636	0.72783	0.66905	0.72603	0.70783	0.75735	0.68059	0.7229	0.71447	0.81009
GDSC_skmel5	0.7154	0.76898	0.74506	0.74964	0.76203	0.78355	0.77291	0.77639	0.77888	0.77388	0.77949	0.77962	0.81037	0.77254	0.76121	0.81399	0.75846	0.75631	0.80252	0.73712	0.76899	0.73249	0.77589	0.74689	0.77215	0.74405	0.69859	0.76723	0.72966	0.75763	0.72616	0.74057	0.75814	0.76981	0.72073	0.76312	0.77344	0.76525	0.74145	0.73206	0.74903	0.71045	0.75613	0.74993	0.76809	0.71045	0.74347	0.7541	0.80903
GDSC_skmes1	0.70737	0.80412	0.75427	0.74736	0.78514	0.78997	0.79409	0.79416	0.80757	0.80749	0.80403	0.79136	0.78289	0.79076	0.76178	0.78792	0.77364	0.74362	0.79239	0.73069	0.79773	0.72874	0.79888	0.74578	0.79226	0.75593	0.69474	0.79143	0.71853	0.74379	0.7604	0.7431	0.79202	0.79753	0.72391	0.79031	0.79526	0.80311	0.76963	0.75636	0.78094	0.69376	0.76927	0.7431	0.79067	0.70229	0.78511	0.75798	0.76229
GDSC_skmm2	0.74384	0.72178	0.72977	0.7475	0.72511	0.75986	0.74046	0.73447	0.74114	0.71982	0.73264	0.74565	0.72926	0.72081	0.72474	0.7368	0.71614	0.73829	0.74451	0.77763	0.72023	0.79944	0.72495	0.72838	0.72602	0.7253	0.7502	0.73417	0.79587	0.73331	0.70025	0.72694	0.71601	0.7244	0.70628	0.72533	0.72617	0.7347	0.70346	0.69372	0.70079	0.76932	0.7287	0.73376	0.72621	0.75584	0.71293	0.72423	0.72363
GDSC_sknas	0.70808	0.74007	0.71061	0.73382	0.7503	0.76556	0.73943	0.75167	0.75082	0.74959	0.74863	0.75845	0.75296	0.75939	0.74536	0.76721	0.7205	0.7598	0.77297	0.71774	0.74486	0.7158	0.74822	0.74786	0.74293	0.71878	0.69488	0.74493	0.70985	0.74833	0.69958	0.7154	0.74487	0.75973	0.70672	0.72781	0.7449	0.73913	0.69762	0.69419	0.71216	0.69108	0.72554	0.72208	0.75885	0.7	0.71471	0.72509	0.74065
GDSC_skndz	0.71023	0.7081	0.68827	0.73675	0.71361	0.75058	0.7099	0.71479	0.71794	0.71109	0.71729	0.71446	0.71121	0.7246	0.72149	0.72778	0.69582	0.74825	0.74068	0.7096	0.70416	0.69956	0.71772	0.73958	0.71072	0.68889	0.68976	0.71384	0.7046	0.73693	0.6571	0.69281	0.69889	0.72189	0.70044	0.69952	0.70872	0.7007	0.66297	0.64944	0.67415	0.69475	0.70085	0.71478	0.72697	0.69426	0.67009	0.70547	0.70474
GDSC_sknfi	0.70389	0.71778	0.69832	0.74009	0.73578	0.75642	0.72829	0.72692	0.73245	0.73354	0.7398	0.7514	0.74078	0.75007	0.73549	0.75071	0.70573	0.74986	0.75659	0.71183	0.7162	0.70682	0.73388	0.74132	0.72882	0.7017	0.69005	0.73718	0.70553	0.74351	0.67637	0.68992	0.73009	0.74901	0.7145	0.71215	0.72686	0.72229	0.6825	0.66442	0.69361	0.69288	0.70763	0.71514	0.73971	0.681	0.68199	0.7087	0.73405
GDSC_sknsh	0.69476	0.73392	0.69338	0.72376	0.7452	0.75824	0.72853	0.73399	0.74109	0.74429	0.73971	0.74534	0.74062	0.75788	0.74065	0.75185	0.71334	0.74672	0.75893	0.70009	0.73721	0.69432	0.73994	0.74326	0.73309	0.7026	0.6766	0.73439	0.69458	0.74364	0.6864	0.70187	0.73909	0.75675	0.69818	0.71737	0.7348	0.72242	0.68644	0.68102	0.70403	0.67436	0.71698	0.71489	0.7539	0.67877	0.69968	0.71237	0.73062
GDSC_skov3	0.69463	0.76574	0.75112	0.7375	0.74722	0.7701	0.76822	0.77754	0.77455	0.76329	0.76737	0.75486	0.74612	0.76428	0.73873	0.75593	0.75041	0.73514	0.76111	0.71841	0.7754	0.71423	0.76875	0.73093	0.76353	0.74421	0.68351	0.74281	0.70849	0.74131	0.74932	0.74586	0.76884	0.75983	0.71693	0.7637	0.76182	0.7597	0.73654	0.7437	0.7563	0.68662	0.76641	0.74998	0.76114	0.69169	0.74689	0.7451	0.73949
GDSC_skut1	0.73796	0.77558	0.75453	0.75771	0.77706	0.80945	0.78301	0.77927	0.78861	0.78012	0.78781	0.77933	0.77042	0.78305	0.78419	0.77934	0.7705	0.77999	0.78208	0.74215	0.77415	0.74414	0.78413	0.76446	0.7837	0.75716	0.72514	0.77283	0.74188	0.77912	0.74367	0.74473	0.76965	0.78417	0.71132	0.7769	0.7945	0.77361	0.75365	0.75039	0.75974	0.72468	0.76731	0.75191	0.79335	0.73904	0.75121	0.76002	0.76144
GDSC_sngm	0.74314	0.78366	0.79279	0.77386	0.7628	0.79951	0.79966	0.81033	0.80351	0.76706	0.78979	0.76547	0.76718	0.77422	0.76344	0.77969	0.77183	0.76705	0.78017	0.74981	0.78437	0.75096	0.78965	0.75275	0.80001	0.79575	0.73199	0.76825	0.75139	0.78012	0.76707	0.7759	0.75395	0.76782	0.73259	0.78625	0.77199	0.77255	0.7586	0.75638	0.75964	0.73938	0.79234	0.78147	0.77608	0.74062	0.76763	0.78598	0.76319
GDSC_snu175	0.71106	0.76045	0.79451	0.77593	0.72663	0.76817	0.77076	0.75876	0.75916	0.72943	0.7479	0.73448	0.73456	0.73283	0.73377	0.74979	0.7561	0.73533	0.74989	0.73398	0.746	0.73265	0.7571	0.72977	0.74972	0.77673	0.70564	0.73323	0.72729	0.74347	0.76234	0.76406	0.71575	0.73419	0.73782	0.77	0.73844	0.7441	0.73382	0.73685	0.74154	0.71585	0.76634	0.77598	0.74134	0.7139	0.76024	0.77315	0.72921
GDSC_snu182	0.70673	0.77893	0.73748	0.74924	0.77252	0.78337	0.78406	0.7686	0.77961	0.77906	0.78841	0.77714	0.76677	0.78863	0.74691	0.77989	0.77069	0.76128	0.77706	0.71406	0.76945	0.71079	0.78233	0.75212	0.77434	0.75126	0.68219	0.76614	0.70513	0.74832	0.72409	0.73534	0.75875	0.78011	0.71135	0.76653	0.77178	0.75813	0.74099	0.72585	0.76617	0.69194	0.7571	0.74537	0.78052	0.68924	0.74847	0.7677	0.76173
GDSC_snu387	0.70257	0.77081	0.73656	0.7303	0.78457	0.76937	0.77037	0.78025	0.79059	0.79217	0.78715	0.80166	0.7815	0.78941	0.75331	0.78141	0.76119	0.73846	0.77947	0.71337	0.78664	0.72249	0.77436	0.74005	0.77683	0.74341	0.68595	0.77005	0.71035	0.73913	0.74763	0.73205	0.78284	0.79602	0.70825	0.7634	0.79711	0.78798	0.75125	0.74209	0.76499	0.68694	0.75066	0.7323	0.78259	0.70087	0.75432	0.7484	0.76989
GDSC_snu398	0.73456	0.7522	0.74961	0.77718	0.76385	0.79856	0.76744	0.76348	0.76566	0.75346	0.76499	0.77081	0.76165	0.76632	0.77463	0.77756	0.7547	0.79436	0.7819	0.75675	0.74892	0.74544	0.77383	0.76406	0.76592	0.74802	0.71731	0.7632	0.7433	0.7833	0.71886	0.73675	0.73747	0.76679	0.72804	0.75933	0.75713	0.75041	0.71899	0.70927	0.73557	0.73229	0.75548	0.76056	0.76804	0.72163	0.72558	0.76061	0.76459
GDSC_snu407	0.7135	0.77761	0.81007	0.76938	0.72884	0.76485	0.7825	0.76302	0.76278	0.73191	0.75092	0.74057	0.74077	0.73687	0.73091	0.75013	0.77256	0.73511	0.7564	0.73214	0.75124	0.73628	0.7632	0.72436	0.75461	0.79563	0.70156	0.73964	0.72797	0.7412	0.78003	0.77662	0.72011	0.73545	0.73112	0.78667	0.73966	0.74947	0.75125	0.76225	0.76517	0.71387	0.78017	0.78022	0.74558	0.71049	0.78347	0.78499	0.73209
GDSC_snu423	0.71274	0.79347	0.7356	0.74397	0.79644	0.79425	0.79179	0.78861	0.80921	0.80936	0.81082	0.79509	0.78634	0.80701	0.76042	0.78808	0.75983	0.75005	0.79233	0.72184	0.79047	0.72565	0.78763	0.74993	0.79315	0.7498	0.6946	0.79786	0.71582	0.75536	0.73964	0.7371	0.79162	0.80342	0.70936	0.7667	0.80249	0.78191	0.75475	0.73787	0.76463	0.69554	0.76394	0.74216	0.80118	0.70268	0.75542	0.75639	0.7717
GDSC_snu449	0.70161	0.76216	0.74398	0.7437	0.75377	0.77572	0.77049	0.78953	0.78226	0.76426	0.77261	0.75749	0.75471	0.77389	0.75437	0.76622	0.74407	0.74467	0.76618	0.7135	0.78131	0.7105	0.79371	0.73958	0.79239	0.75131	0.68589	0.75668	0.70645	0.75298	0.74577	0.73496	0.75325	0.76509	0.71306	0.75935	0.769	0.76061	0.73303	0.72825	0.74468	0.6902	0.75741	0.74488	0.77516	0.69871	0.74167	0.75783	0.74632
GDSC_snu475	0.71171	0.77864	0.74497	0.7501	0.78908	0.79012	0.78627	0.7884	0.80189	0.79338	0.79156	0.80604	0.78668	0.8	0.76294	0.79041	0.76562	0.7617	0.7879	0.73234	0.79972	0.73042	0.79994	0.75183	0.79194	0.75538	0.69338	0.78007	0.71928	0.75449	0.74503	0.74505	0.78265	0.79369	0.72836	0.77254	0.79961	0.78686	0.7501	0.74072	0.77143	0.69879	0.76888	0.74571	0.78943	0.70173	0.75604	0.76819	0.77291
GDSC_snu61	0.6955	0.7723	0.80774	0.754	0.7167	0.75736	0.78189	0.75646	0.75677	0.72501	0.7445	0.72905	0.72823	0.72691	0.72044	0.73861	0.76223	0.71769	0.74177	0.71656	0.75066	0.72593	0.7606	0.71279	0.75225	0.79635	0.68807	0.72642	0.71532	0.72585	0.80693	0.77949	0.71612	0.72462	0.72985	0.78699	0.73292	0.7524	0.75381	0.77026	0.76345	0.69667	0.7819	0.7698	0.73204	0.70045	0.78733	0.79918	0.71765
GDSC_snu81	0.71828	0.78184	0.82236	0.77431	0.73427	0.77869	0.78682	0.7738	0.76741	0.73838	0.7605	0.74206	0.74111	0.74215	0.7362	0.75397	0.77375	0.7395	0.75862	0.74068	0.75591	0.74375	0.77489	0.73151	0.75976	0.80854	0.71204	0.74399	0.73353	0.74475	0.79888	0.77928	0.72367	0.74054	0.74094	0.79211	0.74166	0.75851	0.75647	0.76976	0.76273	0.72113	0.78463	0.78088	0.74985	0.71754	0.79344	0.79787	0.73344
GDSC_snuc1	0.67105	0.74453	0.79402	0.74008	0.68955	0.73079	0.7457	0.73506	0.72967	0.7006	0.71269	0.70168	0.70952	0.69983	0.69392	0.71376	0.73433	0.69061	0.71888	0.70438	0.72553	0.70985	0.73172	0.68572	0.71703	0.7707	0.67097	0.69935	0.7016	0.70298	0.78553	0.76013	0.69754	0.7	0.72564	0.75513	0.70675	0.73121	0.72183	0.74261	0.7353	0.68212	0.75592	0.74972	0.71052	0.68591	0.75746	0.7745	0.69648
GDSC_snuc5	0.71283	0.7923	0.81389	0.76083	0.7438	0.78223	0.80564	0.77872	0.77876	0.7549	0.77749	0.75447	0.75109	0.75484	0.74046	0.76144	0.78265	0.73407	0.76359	0.73133	0.76636	0.73538	0.77443	0.72638	0.77218	0.80619	0.70331	0.75166	0.73095	0.74573	0.79945	0.77711	0.74716	0.74936	0.73481	0.80249	0.76382	0.77295	0.77935	0.78701	0.78438	0.71138	0.78748	0.77146	0.75524	0.72041	0.79801	0.7905	0.74345
GDSC_st486	0.77227	0.70575	0.72039	0.72759	0.71197	0.7458	0.72424	0.72332	0.72573	0.70093	0.71603	0.71886	0.71226	0.70737	0.71406	0.72158	0.70323	0.72952	0.72774	0.75968	0.70394	0.77524	0.70799	0.71659	0.7082	0.72072	0.77433	0.71953	0.79207	0.73256	0.68571	0.71226	0.69034	0.70911	0.68202	0.71453	0.71478	0.70382	0.68342	0.68701	0.68567	0.82228	0.72206	0.72342	0.71305	0.78354	0.69333	0.70854	0.71066
GDSC_su8686	0.69258	0.80222	0.77622	0.75097	0.74594	0.76547	0.80815	0.76996	0.77214	0.76524	0.77275	0.77889	0.75509	0.75635	0.72903	0.7596	0.78013	0.72322	0.7584	0.71194	0.76562	0.7227	0.76985	0.72441	0.77446	0.7746	0.68175	0.75124	0.70516	0.71747	0.7857	0.7668	0.77104	0.75514	0.73277	0.80898	0.76302	0.78144	0.7881	0.7857	0.79846	0.68733	0.78762	0.76339	0.7492	0.69288	0.80749	0.77375	0.74431
GDSC_sudhl1	0.74704	0.74553	0.74422	0.74264	0.74248	0.78065	0.7553	0.75431	0.76218	0.7403	0.75323	0.74829	0.74598	0.74405	0.73849	0.7557	0.73992	0.74924	0.76124	0.76292	0.73882	0.76757	0.74788	0.73464	0.74003	0.74269	0.75596	0.75444	0.77086	0.7502	0.71163	0.7318	0.72396	0.74291	0.70026	0.7453	0.7507	0.74332	0.71986	0.71534	0.71803	0.76003	0.74337	0.73442	0.74668	0.76169	0.72725	0.73886	0.74095
GDSC_sudhl10	0.76731	0.7076	0.71165	0.72358	0.7065	0.74397	0.72061	0.7209	0.72648	0.69812	0.7176	0.70591	0.70879	0.70336	0.71013	0.72301	0.69952	0.72447	0.72594	0.75371	0.69377	0.76545	0.71135	0.71243	0.70263	0.71292	0.77355	0.71701	0.78619	0.72298	0.67639	0.70636	0.67674	0.70317	0.67147	0.70617	0.7049	0.69801	0.67645	0.66917	0.6759	0.823	0.71363	0.71208	0.71402	0.77119	0.69479	0.70558	0.70204
GDSC_sudhl4	0.75659	0.69682	0.70103	0.7095	0.69159	0.73161	0.70716	0.70673	0.71317	0.68351	0.69844	0.69169	0.69497	0.69308	0.69917	0.70746	0.68528	0.71179	0.71444	0.73995	0.68393	0.75298	0.69574	0.70044	0.69044	0.69898	0.75784	0.70015	0.77819	0.7172	0.67084	0.69814	0.66962	0.68983	0.66065	0.69479	0.69362	0.68088	0.66265	0.66481	0.66643	0.81897	0.70239	0.70131	0.69967	0.76793	0.68236	0.69522	0.68932
GDSC_sudhl6	0.75248	0.68788	0.69567	0.71021	0.69095	0.73061	0.7063	0.70344	0.70437	0.68269	0.69798	0.69616	0.69117	0.68467	0.69609	0.70307	0.67885	0.71018	0.71025	0.74199	0.67917	0.75449	0.69372	0.69488	0.68844	0.70114	0.75981	0.69708	0.77886	0.71315	0.66518	0.69107	0.66973	0.68547	0.66203	0.6925	0.69157	0.68353	0.65974	0.66042	0.66053	0.82046	0.70069	0.70391	0.69648	0.76069	0.67324	0.69378	0.68686
GDSC_sudhl8	0.77798	0.71227	0.71677	0.72647	0.71399	0.75111	0.72702	0.72508	0.72976	0.70408	0.72244	0.72046	0.71524	0.71143	0.71718	0.72593	0.70451	0.73029	0.73347	0.75764	0.70107	0.7753	0.70841	0.71957	0.7112	0.71921	0.78362	0.72338	0.79227	0.73274	0.68425	0.70957	0.69274	0.70959	0.6742	0.71329	0.71601	0.70732	0.68484	0.68093	0.68203	0.81233	0.71927	0.72051	0.71997	0.79326	0.69785	0.70748	0.71074
GDSC_suit2	0.69237	0.77128	0.7768	0.74582	0.74456	0.76974	0.77352	0.7829	0.77387	0.75908	0.76915	0.76096	0.75473	0.75956	0.73831	0.75987	0.75862	0.72851	0.76724	0.71399	0.77581	0.71849	0.78086	0.72432	0.77418	0.76483	0.68409	0.74841	0.70999	0.73355	0.82302	0.74458	0.76511	0.7607	0.72919	0.77633	0.75756	0.78801	0.75236	0.75451	0.76184	0.68589	0.75972	0.74633	0.75683	0.69532	0.76785	0.76957	0.74413
GDSC_supb15	0.79783	0.71592	0.70563	0.7129	0.7191	0.7453	0.7259	0.72594	0.73252	0.71717	0.72788	0.71833	0.71274	0.71772	0.71277	0.73248	0.70388	0.72295	0.73378	0.73047	0.70824	0.74339	0.71069	0.72344	0.71109	0.71155	0.76981	0.72537	0.75718	0.72741	0.68565	0.7021	0.70389	0.72231	0.6702	0.71356	0.72896	0.70762	0.69142	0.68575	0.68813	0.76736	0.71582	0.71521	0.72363	0.81642	0.69776	0.70219	0.71807
GDSC_suphd1	0.72087	0.70173	0.70934	0.71497	0.71286	0.73963	0.72237	0.72094	0.72445	0.70342	0.71749	0.71983	0.71292	0.71203	0.71182	0.71826	0.69989	0.7178	0.72354	0.73998	0.70596	0.74932	0.71589	0.70274	0.70891	0.71014	0.72756	0.71649	0.75803	0.71717	0.68071	0.69848	0.69081	0.71328	0.67795	0.70433	0.71461	0.70863	0.67966	0.68043	0.68283	0.74287	0.70801	0.70978	0.71328	0.73275	0.68776	0.7	0.70979
GDSC_supm2	0.70433	0.71095	0.71149	0.7017	0.71568	0.73259	0.72431	0.72648	0.72872	0.71158	0.71491	0.72923	0.71634	0.71569	0.70568	0.71891	0.71036	0.70565	0.72717	0.73329	0.71782	0.74394	0.71126	0.69846	0.7111	0.70425	0.71715	0.71669	0.74118	0.7058	0.69789	0.69783	0.71588	0.72048	0.67791	0.71546	0.72089	0.72274	0.70043	0.70546	0.69968	0.71315	0.70857	0.70034	0.71123	0.72124	0.70489	0.69558	0.71496
GDSC_supt1	0.78968	0.72894	0.72431	0.74799	0.7345	0.77162	0.74329	0.7403	0.74261	0.72145	0.74178	0.73416	0.72827	0.72814	0.7354	0.7442	0.72234	0.75077	0.75212	0.77028	0.71351	0.77347	0.73211	0.74468	0.72389	0.73333	0.82181	0.74144	0.78398	0.75427	0.69117	0.72021	0.69959	0.73167	0.69223	0.72661	0.72785	0.71679	0.69191	0.6819	0.69525	0.79404	0.73286	0.73945	0.73906	0.77871	0.70723	0.72684	0.72763
GDSC_sw1088	0.72792	0.79431	0.73811	0.74639	0.83048	0.80342	0.78633	0.78995	0.81306	0.82146	0.81375	0.81228	0.80595	0.82751	0.77907	0.80253	0.7712	0.76622	0.80443	0.72754	0.80159	0.73489	0.79412	0.76845	0.79431	0.74912	0.70811	0.8076	0.72517	0.77286	0.73852	0.74042	0.79483	0.84364	0.70935	0.77083	0.8131	0.78703	0.75359	0.73912	0.76814	0.70942	0.7668	0.74522	0.81537	0.71638	0.76296	0.75773	0.79121
GDSC_sw1116	0.67222	0.75994	0.78829	0.72647	0.70144	0.73276	0.76535	0.74391	0.74452	0.71485	0.73207	0.71957	0.71185	0.71699	0.69734	0.71763	0.74874	0.68789	0.72221	0.68771	0.73719	0.69819	0.74473	0.68691	0.73777	0.7741	0.66408	0.71166	0.68819	0.69795	0.80989	0.75346	0.71524	0.714	0.71694	0.77427	0.72413	0.75024	0.75466	0.76279	0.75958	0.66892	0.75981	0.74562	0.71331	0.67812	0.773	0.78167	0.70563
GDSC_sw1271	0.74071	0.79096	0.76146	0.76468	0.78884	0.81418	0.79671	0.79719	0.8014	0.80038	0.81601	0.78485	0.78218	0.80049	0.78242	0.79608	0.77875	0.77227	0.79952	0.74994	0.7851	0.75013	0.79559	0.76594	0.79135	0.76489	0.72739	0.79824	0.74952	0.77852	0.75415	0.75312	0.78503	0.79207	0.72631	0.78465	0.79368	0.78455	0.77106	0.75336	0.76961	0.7294	0.78057	0.76267	0.7969	0.73818	0.76665	0.76659	0.77861
GDSC_sw1417	0.68485	0.78436	0.78464	0.73802	0.7186	0.76008	0.77998	0.75142	0.75511	0.73305	0.74573	0.7246	0.73575	0.73425	0.71567	0.73864	0.75543	0.70779	0.75279	0.70015	0.74707	0.71141	0.75046	0.70566	0.74209	0.78148	0.68078	0.72615	0.70827	0.72541	0.79738	0.76674	0.72956	0.72893	0.72612	0.77856	0.72716	0.74226	0.75435	0.76607	0.7558	0.68504	0.77585	0.75675	0.73658	0.68928	0.78356	0.78046	0.72147
GDSC_sw1463	0.69755	0.74628	0.79481	0.75439	0.70012	0.74729	0.7545	0.74394	0.74006	0.70873	0.72603	0.71545	0.70996	0.70741	0.70823	0.722	0.73544	0.71112	0.72864	0.71792	0.7295	0.7228	0.73814	0.70419	0.73109	0.77691	0.69442	0.71121	0.71566	0.72004	0.78373	0.75726	0.70316	0.70699	0.74156	0.764	0.7179	0.74068	0.72565	0.73508	0.73103	0.70348	0.75409	0.75919	0.71631	0.70724	0.7526	0.78395	0.70403
GDSC_sw1573	0.71979	0.76681	0.74811	0.74553	0.76432	0.79171	0.77305	0.777	0.78344	0.76818	0.77807	0.7597	0.75951	0.78054	0.7616	0.77	0.75758	0.75103	0.7777	0.73101	0.77572	0.72514	0.78012	0.7411	0.77809	0.7574	0.70607	0.76624	0.72919	0.76347	0.7488	0.73483	0.76118	0.77216	0.70887	0.764	0.7746	0.76478	0.7393	0.73345	0.74391	0.70669	0.76215	0.74658	0.77629	0.71941	0.74234	0.75171	0.75626
GDSC_sw1710	0.72784	0.79819	0.76403	0.76082	0.79263	0.80422	0.80074	0.83745	0.8426	0.80652	0.80773	0.80057	0.78779	0.80415	0.77087	0.79405	0.78288	0.76163	0.79497	0.73646	0.82338	0.73889	0.80289	0.75524	0.83072	0.77001	0.71261	0.79061	0.73049	0.76437	0.76257	0.75801	0.79353	0.80379	0.72984	0.789	0.81575	0.80017	0.77021	0.76447	0.78165	0.71471	0.78537	0.76411	0.80212	0.72379	0.77298	0.77374	0.77682
GDSC_sw1783	0.72108	0.80282	0.74819	0.75225	0.82236	0.8118	0.79525	0.79073	0.81803	0.82645	0.81944	0.81841	0.80352	0.82462	0.77918	0.80624	0.77878	0.76585	0.80481	0.73397	0.80486	0.73701	0.79636	0.76498	0.79634	0.75154	0.70587	0.80941	0.72963	0.77061	0.74608	0.74304	0.81129	0.83337	0.71431	0.7814	0.82857	0.7978	0.77136	0.75565	0.781	0.7064	0.76874	0.74439	0.82239	0.72098	0.77078	0.75845	0.78901
GDSC_sw1990	0.70198	0.81351	0.78073	0.74442	0.7579	0.77991	0.80069	0.77665	0.78327	0.77176	0.78708	0.75885	0.75968	0.76678	0.74418	0.76485	0.79598	0.73166	0.77263	0.71676	0.77286	0.72511	0.78107	0.72823	0.77363	0.77718	0.69212	0.76598	0.7179	0.73915	0.78986	0.76854	0.76139	0.76495	0.71133	0.81698	0.76954	0.77178	0.7973	0.79498	0.79833	0.69583	0.78943	0.758	0.76884	0.70571	0.82802	0.77491	0.74142
GDSC_sw48	0.71257	0.77282	0.79798	0.75931	0.73405	0.77656	0.78037	0.7642	0.76519	0.73719	0.75451	0.73783	0.74052	0.74238	0.73993	0.75473	0.77196	0.73582	0.75646	0.72982	0.75351	0.7347	0.76098	0.72575	0.75687	0.78984	0.70528	0.7395	0.73441	0.74879	0.77754	0.76776	0.73077	0.74176	0.73027	0.78755	0.75101	0.75608	0.75912	0.76712	0.75994	0.71453	0.7721	0.76842	0.74493	0.72662	0.76782	0.77556	0.73896
GDSC_sw620	0.7165	0.77191	0.77019	0.75641	0.73485	0.78032	0.77139	0.76387	0.76459	0.73683	0.753	0.73989	0.74408	0.7416	0.74081	0.75733	0.75335	0.73838	0.76807	0.73545	0.7512	0.73912	0.76351	0.73247	0.75557	0.76657	0.71075	0.74301	0.73684	0.75073	0.76405	0.75313	0.7341	0.74075	0.73444	0.77187	0.74422	0.75601	0.73376	0.73775	0.74218	0.71903	0.76233	0.75525	0.75026	0.72244	0.75593	0.7745	0.73004
GDSC_sw948	0.71271	0.7715	0.81059	0.77836	0.72257	0.76893	0.77864	0.76873	0.76328	0.73398	0.74999	0.73588	0.73877	0.73403	0.73049	0.74993	0.76154	0.73036	0.75366	0.73172	0.75344	0.73795	0.76585	0.72606	0.75698	0.79713	0.70404	0.73459	0.73111	0.74052	0.79523	0.77537	0.71929	0.73371	0.75516	0.78241	0.73876	0.75554	0.74247	0.74945	0.75232	0.71559	0.77775	0.78101	0.73978	0.71545	0.77165	0.80392	0.73073
GDSC_t24	0.73797	0.82497	0.77128	0.76445	0.80333	0.82446	0.81885	0.80715	0.8202	0.8283	0.83619	0.80193	0.7928	0.80833	0.77832	0.80078	0.79469	0.76983	0.80709	0.7454	0.80137	0.74948	0.8036	0.76691	0.80803	0.7787	0.72603	0.80761	0.74201	0.77227	0.77584	0.76165	0.81083	0.80886	0.72765	0.80564	0.80993	0.80063	0.79358	0.77892	0.79234	0.72336	0.79058	0.76553	0.80825	0.73684	0.80319	0.77884	0.78089
GDSC_t47d	0.70216	0.75355	0.77161	0.77909	0.73295	0.76812	0.77655	0.75316	0.75288	0.73348	0.74904	0.75503	0.73627	0.74444	0.74467	0.74858	0.75203	0.74249	0.75892	0.73681	0.74993	0.73609	0.75476	0.73335	0.74985	0.76216	0.69674	0.7354	0.72363	0.75423	0.73841	0.7872	0.73662	0.7399	0.72556	0.76724	0.73551	0.74469	0.73662	0.74312	0.75553	0.70446	0.78483	0.80053	0.74887	0.70561	0.75353	0.76011	0.73137
GDSC_t84	0.70857	0.7781	0.80302	0.76056	0.73071	0.76967	0.78513	0.76711	0.76652	0.735	0.75564	0.73976	0.73943	0.73671	0.72984	0.74718	0.76554	0.72892	0.75354	0.72609	0.75479	0.73714	0.76661	0.72261	0.75884	0.79884	0.70333	0.7379	0.7274	0.73792	0.79788	0.77314	0.72616	0.74019	0.73379	0.79074	0.74331	0.76189	0.75677	0.76663	0.75872	0.70845	0.78183	0.77056	0.74367	0.71245	0.78338	0.79857	0.7303
GDSC_t98g	0.73524	0.783	0.74437	0.74829	0.81426	0.79698	0.78424	0.79015	0.80914	0.80145	0.79861	0.80128	0.78981	0.81381	0.77641	0.79724	0.76967	0.76283	0.79878	0.73231	0.8035	0.73708	0.78891	0.76443	0.78645	0.74947	0.71726	0.7932	0.73134	0.77297	0.73895	0.74492	0.78565	0.81771	0.71533	0.76602	0.8103	0.78119	0.75522	0.74278	0.76224	0.71338	0.77175	0.74971	0.8036	0.72919	0.75535	0.75324	0.78218
GDSC_tc71	0.72895	0.73674	0.73016	0.76123	0.7478	0.77693	0.74666	0.74478	0.75109	0.73645	0.74751	0.75131	0.74663	0.74839	0.75438	0.76559	0.73889	0.77136	0.76832	0.74412	0.7376	0.73816	0.75227	0.8231	0.7441	0.7269	0.7196	0.74571	0.7369	0.75814	0.70288	0.72322	0.72636	0.75046	0.71213	0.74264	0.74625	0.7348	0.70385	0.6977	0.71855	0.7231	0.73295	0.73803	0.75818	0.72682	0.71333	0.73581	0.74103
GDSC_tccsup	0.70721	0.79442	0.73967	0.7387	0.79724	0.79518	0.79236	0.77852	0.79634	0.79757	0.80186	0.80248	0.77973	0.8043	0.75881	0.78309	0.77172	0.75223	0.78761	0.71967	0.78824	0.72706	0.78471	0.74446	0.78557	0.75392	0.69652	0.78528	0.71397	0.75265	0.74643	0.74186	0.78334	0.80414	0.70403	0.77426	0.79489	0.78396	0.76506	0.74889	0.76844	0.6943	0.77331	0.73958	0.79756	0.69951	0.77266	0.75741	0.76544
GDSC_te1	0.71381	0.80647	0.77403	0.76238	0.76606	0.79909	0.81614	0.78193	0.79295	0.77045	0.78525	0.77375	0.77451	0.7779	0.75788	0.7792	0.80792	0.75146	0.7842	0.73471	0.78794	0.73509	0.78926	0.74452	0.79006	0.78465	0.70066	0.76508	0.73114	0.75866	0.7692	0.78396	0.75646	0.77222	0.72918	0.80291	0.77795	0.77054	0.7811	0.78126	0.79347	0.71192	0.81076	0.77163	0.77894	0.71298	0.78957	0.78913	0.75615
GDSC_te10	0.72005	0.81255	0.78943	0.77223	0.77529	0.80281	0.81578	0.7887	0.79641	0.78099	0.79716	0.7726	0.77346	0.7724	0.76055	0.78109	0.82256	0.75415	0.78896	0.74893	0.78104	0.74123	0.79578	0.75071	0.7822	0.79326	0.70765	0.77716	0.73613	0.76158	0.76707	0.78949	0.76353	0.77738	0.73263	0.82744	0.78145	0.77476	0.80533	0.80419	0.81411	0.71769	0.81139	0.7837	0.78524	0.71905	0.8142	0.78694	0.76088
GDSC_te11	0.69684	0.78605	0.77669	0.74857	0.73849	0.7631	0.78645	0.76412	0.76627	0.75043	0.76488	0.74741	0.74175	0.7466	0.73211	0.75256	0.80496	0.72847	0.7584	0.7179	0.7695	0.72217	0.77092	0.72439	0.75887	0.76767	0.68526	0.74392	0.71109	0.72765	0.76109	0.77436	0.74622	0.75088	0.7239	0.81058	0.76092	0.75979	0.79398	0.79816	0.80006	0.69251	0.78749	0.76282	0.75025	0.70623	0.79801	0.76114	0.73485
GDSC_te15	0.67246	0.76943	0.76479	0.7311	0.72037	0.74481	0.7777	0.74021	0.74153	0.73086	0.74586	0.73705	0.72341	0.7241	0.71248	0.72749	0.7823	0.70382	0.73449	0.69945	0.73972	0.70453	0.74459	0.70176	0.74151	0.75428	0.66994	0.72513	0.69023	0.70824	0.75928	0.75895	0.73827	0.73147	0.70348	0.80105	0.73752	0.74711	0.78888	0.79421	0.79316	0.66993	0.77473	0.75192	0.72748	0.67825	0.79302	0.7418	0.71764
GDSC_te4	0.70537	0.77833	0.79114	0.77109	0.73963	0.76892	0.79002	0.77257	0.76831	0.75049	0.76501	0.76238	0.75191	0.75677	0.73171	0.76723	0.77686	0.73857	0.768	0.72774	0.76359	0.73093	0.78144	0.73607	0.76615	0.77276	0.68755	0.74597	0.72291	0.7382	0.75901	0.78639	0.74396	0.75655	0.7516	0.79635	0.74881	0.76667	0.75616	0.7577	0.77714	0.70322	0.78638	0.78314	0.75067	0.7004	0.7786	0.77634	0.74713
GDSC_te441t	0.71342	0.72724	0.7059	0.72091	0.73677	0.75845	0.72467	0.73632	0.74154	0.73397	0.73706	0.71257	0.72569	0.7448	0.74208	0.74473	0.71275	0.74723	0.75307	0.70122	0.73041	0.70034	0.73293	0.73666	0.71891	0.71696	0.70057	0.72822	0.70885	0.75708	0.69077	0.7182	0.71239	0.74126	0.68348	0.71135	0.72603	0.70314	0.68439	0.68271	0.69409	0.69293	0.73025	0.72338	0.7547	0.70804	0.70457	0.72158	0.72553
GDSC_te5	0.70731	0.79436	0.7752	0.76145	0.74959	0.7798	0.7993	0.7738	0.77659	0.75886	0.77882	0.75163	0.75357	0.76194	0.745	0.76494	0.80966	0.73848	0.76647	0.72472	0.76881	0.72635	0.78019	0.73756	0.77305	0.77559	0.69154	0.75631	0.72031	0.74399	0.76283	0.77248	0.74472	0.76219	0.72353	0.81638	0.76388	0.75938	0.78832	0.78183	0.80083	0.70212	0.79107	0.77625	0.7623	0.70253	0.80291	0.77921	0.74733
GDSC_te6	0.71704	0.77964	0.77599	0.76657	0.75412	0.78379	0.7903	0.76718	0.76679	0.75737	0.77199	0.76918	0.758	0.75441	0.7506	0.77038	0.80204	0.75458	0.7731	0.73922	0.76289	0.74027	0.7764	0.74938	0.76411	0.77177	0.70329	0.75383	0.73255	0.7516	0.74452	0.76424	0.75309	0.76065	0.73625	0.80926	0.76259	0.76486	0.77892	0.77529	0.78827	0.71132	0.7822	0.77601	0.75867	0.71204	0.78227	0.77034	0.75314
GDSC_te8	0.72309	0.8004	0.76376	0.76098	0.78813	0.81136	0.79724	0.79055	0.80035	0.78989	0.79892	0.78055	0.77968	0.80573	0.77731	0.78425	0.80436	0.76747	0.7951	0.7373	0.7999	0.737	0.80013	0.76229	0.7866	0.77383	0.70896	0.77727	0.73467	0.77586	0.75568	0.76625	0.77658	0.79789	0.72374	0.79087	0.7962	0.76963	0.77469	0.77541	0.79232	0.71242	0.79832	0.76908	0.80239	0.72177	0.77987	0.7782	0.7655
GDSC_te9	0.71435	0.8054	0.77839	0.75377	0.75883	0.78738	0.79812	0.78121	0.78488	0.77148	0.78815	0.75795	0.76354	0.76633	0.74719	0.77193	0.82854	0.74248	0.78013	0.73555	0.77825	0.73801	0.78791	0.73926	0.77386	0.77612	0.70083	0.76949	0.73057	0.74455	0.76217	0.77563	0.75652	0.76789	0.72068	0.82443	0.77941	0.76856	0.80679	0.80715	0.81278	0.71045	0.79317	0.76547	0.76986	0.71778	0.81331	0.77217	0.75196
GDSC_thp1	0.73056	0.71441	0.70647	0.71228	0.7114	0.73607	0.7224	0.72374	0.72681	0.70884	0.71887	0.7207	0.71234	0.71275	0.71224	0.7276	0.70751	0.71463	0.72882	0.72411	0.71204	0.73522	0.71363	0.71307	0.7091	0.70693	0.73311	0.71347	0.73685	0.71284	0.69588	0.70567	0.70014	0.71346	0.67091	0.71521	0.71974	0.71113	0.69139	0.68855	0.69686	0.7337	0.71765	0.70869	0.72067	0.7416	0.70736	0.70688	0.70671
GDSC_tov112d	0.73926	0.74595	0.72603	0.76415	0.76633	0.7965	0.76036	0.75677	0.75753	0.75676	0.76785	0.76535	0.75462	0.76524	0.77852	0.77261	0.74419	0.80732	0.77524	0.74424	0.74025	0.73689	0.76676	0.77162	0.76243	0.73615	0.71642	0.76341	0.7328	0.77324	0.69859	0.71858	0.73464	0.7692	0.71263	0.74586	0.75436	0.74283	0.70541	0.69292	0.72299	0.72693	0.73949	0.74622	0.76883	0.71836	0.71288	0.74564	0.75543
GDSC_tov21g	0.71728	0.77662	0.76409	0.76251	0.76323	0.79305	0.78311	0.80234	0.79854	0.77075	0.78485	0.76836	0.76971	0.77666	0.76559	0.78056	0.7624	0.76368	0.77799	0.72847	0.78632	0.7244	0.79261	0.75294	0.80673	0.7594	0.70177	0.76523	0.72411	0.77294	0.74857	0.74766	0.75744	0.77392	0.7224	0.77178	0.77551	0.76727	0.7417	0.7366	0.75596	0.70811	0.76841	0.75671	0.78275	0.71271	0.75409	0.77085	0.76109
GDSC_tt2609c02	0.72494	0.79265	0.7483	0.75295	0.77925	0.80552	0.79003	0.79125	0.79841	0.79502	0.79756	0.79258	0.7793	0.80148	0.77125	0.7927	0.7666	0.7632	0.79433	0.73336	0.7857	0.73963	0.78827	0.75936	0.79147	0.75271	0.7139	0.78278	0.73382	0.76273	0.7545	0.73918	0.80108	0.79474	0.71648	0.78486	0.79101	0.7936	0.75894	0.75423	0.76062	0.71362	0.76338	0.74661	0.79132	0.72115	0.76151	0.75434	0.76722
GDSC_tyknu	0.74272	0.78044	0.75281	0.75482	0.77975	0.80786	0.78516	0.7859	0.79303	0.78624	0.80054	0.77441	0.77984	0.78492	0.77654	0.79016	0.76251	0.77561	0.79192	0.75142	0.77065	0.75282	0.78361	0.75752	0.77968	0.76442	0.73284	0.79323	0.75318	0.77375	0.74855	0.74242	0.75805	0.78069	0.71204	0.77332	0.78329	0.7727	0.74667	0.74004	0.74608	0.74046	0.76162	0.74498	0.78903	0.7431	0.76306	0.76067	0.76873
GDSC_u118mg	0.70519	0.76393	0.71928	0.73284	0.81899	0.78384	0.75841	0.76774	0.78524	0.80302	0.79751	0.79531	0.78172	0.7987	0.76329	0.78216	0.74642	0.74858	0.78738	0.71303	0.77067	0.72105	0.76302	0.75115	0.76956	0.72619	0.69359	0.79837	0.71062	0.74842	0.71529	0.71405	0.78309	0.82465	0.69265	0.74149	0.79086	0.76492	0.73396	0.71448	0.74484	0.69107	0.73787	0.72448	0.79293	0.70027	0.7349	0.72628	0.77498
GDSC_u2os	0.72116	0.7749	0.73249	0.74739	0.78957	0.79333	0.77462	0.77546	0.78516	0.7861	0.78673	0.7912	0.77371	0.79348	0.76052	0.7831	0.76268	0.76493	0.79414	0.73331	0.77274	0.73049	0.77681	0.7553	0.77633	0.7476	0.70595	0.7891	0.72591	0.76497	0.71838	0.73571	0.76288	0.78937	0.71026	0.75443	0.77721	0.75724	0.7355	0.71771	0.75027	0.70631	0.75834	0.74344	0.77697	0.70901	0.74174	0.75018	0.76195
GDSC_u87mg	0.69649	0.76018	0.72641	0.72647	0.78737	0.77489	0.75569	0.76444	0.7837	0.79247	0.77734	0.78636	0.7802	0.78307	0.75119	0.77316	0.7456	0.7397	0.77658	0.71575	0.77832	0.71971	0.76341	0.73862	0.7668	0.72106	0.68495	0.78157	0.71574	0.73499	0.71683	0.71629	0.7849	0.79523	0.70074	0.74879	0.80188	0.77242	0.73812	0.73239	0.74697	0.69052	0.73692	0.71846	0.77855	0.70654	0.73376	0.72627	0.76833
GDSC_uacc257	0.70432	0.7508	0.72678	0.73184	0.74604	0.76561	0.75469	0.75167	0.75823	0.75634	0.75341	0.75836	0.80391	0.75405	0.74306	0.81032	0.72951	0.73977	0.7963	0.71824	0.75342	0.72015	0.75096	0.73511	0.75036	0.72877	0.68717	0.7462	0.72206	0.74903	0.7149	0.73107	0.74135	0.75103	0.70513	0.73977	0.74812	0.73634	0.7126	0.71188	0.72622	0.69711	0.74155	0.73282	0.75277	0.70231	0.73165	0.7386	0.80316
GDSC_uacc62	0.70316	0.75674	0.72487	0.73915	0.7794	0.77467	0.75794	0.76779	0.77489	0.7817	0.7777	0.77867	0.82888	0.78169	0.76614	0.82249	0.74704	0.75121	0.82483	0.72162	0.77473	0.7203	0.76721	0.74648	0.76373	0.72808	0.68068	0.77623	0.71551	0.75337	0.71455	0.7263	0.76361	0.78903	0.70739	0.7461	0.77324	0.76095	0.72434	0.7109	0.7381	0.68951	0.74288	0.72924	0.7716	0.69552	0.73168	0.73417	0.82575
GDSC_uacc812	0.69492	0.75683	0.77133	0.75599	0.71537	0.75843	0.77254	0.74453	0.74532	0.72348	0.73554	0.72599	0.72296	0.73115	0.72726	0.73529	0.74086	0.7208	0.74228	0.7175	0.74304	0.71403	0.74912	0.71701	0.73649	0.75876	0.68866	0.71189	0.71195	0.73885	0.75128	0.79758	0.73043	0.72593	0.72092	0.77179	0.73058	0.73869	0.74031	0.74638	0.74959	0.6947	0.78908	0.79862	0.74143	0.70425	0.75469	0.76168	0.7171
GDSC_umuc3	0.73936	0.78772	0.75308	0.7575	0.7896	0.8148	0.78586	0.79706	0.80349	0.80163	0.81074	0.7818	0.78278	0.79246	0.77747	0.79422	0.76887	0.77217	0.80084	0.74659	0.78176	0.74606	0.79496	0.76332	0.78827	0.75591	0.72166	0.80485	0.7457	0.77565	0.73815	0.74681	0.77733	0.79212	0.71463	0.77557	0.80041	0.78291	0.75564	0.73906	0.75364	0.72881	0.76515	0.74997	0.80125	0.74024	0.75647	0.7594	0.77439
GDSC_vcap	0.69954	0.73447	0.74498	0.78469	0.70878	0.74804	0.74316	0.73184	0.73305	0.71406	0.72498	0.715	0.71228	0.71478	0.72002	0.72985	0.72097	0.72247	0.73334	0.70723	0.7174	0.70979	0.73237	0.72134	0.71854	0.73547	0.68893	0.70912	0.70398	0.72962	0.70732	0.7448	0.70064	0.71681	0.72768	0.73715	0.70775	0.71741	0.69681	0.69551	0.70882	0.69629	0.74385	0.77234	0.72547	0.69226	0.7148	0.74269	0.71318
GDSC_vmcub1	0.73428	0.83483	0.78372	0.77594	0.79054	0.82762	0.82768	0.80416	0.81896	0.81049	0.82903	0.78501	0.78991	0.79315	0.77147	0.79896	0.81181	0.77067	0.80493	0.75623	0.78864	0.75458	0.808	0.75783	0.80031	0.79022	0.7234	0.80884	0.74934	0.76917	0.7687	0.7725	0.78191	0.79235	0.7308	0.82054	0.80064	0.79053	0.80036	0.78874	0.80222	0.73689	0.79674	0.77293	0.80286	0.73317	0.81551	0.78982	0.77191
GDSC_vmrclcd	0.6992	0.72213	0.74911	0.77801	0.7112	0.74995	0.74134	0.74641	0.73698	0.70912	0.72495	0.73184	0.72675	0.72384	0.71813	0.74006	0.72667	0.73653	0.74129	0.72846	0.72778	0.72454	0.74605	0.72831	0.73531	0.73326	0.68674	0.72172	0.72114	0.72945	0.71401	0.73393	0.69852	0.71789	0.80154	0.735	0.7145	0.73363	0.69045	0.68783	0.70937	0.70775	0.73522	0.752	0.72093	0.69155	0.70744	0.75019	0.7242
GDSC_vmrcrcz	0.73177	0.79242	0.75387	0.75526	0.79318	0.80475	0.79889	0.83861	0.84043	0.80086	0.81226	0.78097	0.78373	0.80909	0.76815	0.79301	0.77368	0.76277	0.78942	0.73623	0.81878	0.73749	0.80793	0.7536	0.82734	0.76502	0.71508	0.79356	0.73317	0.76614	0.74566	0.75282	0.77395	0.7992	0.72792	0.7737	0.81232	0.78085	0.75893	0.74932	0.77063	0.72129	0.78079	0.76117	0.80147	0.72195	0.76098	0.77167	0.77454
GDSC_wm115	0.69205	0.75922	0.70978	0.71923	0.79794	0.76576	0.75472	0.75881	0.7711	0.79849	0.78087	0.78749	0.808	0.79063	0.75446	0.80566	0.74422	0.73453	0.80185	0.69928	0.7731	0.70545	0.75626	0.74698	0.76191	0.71433	0.67103	0.77531	0.69699	0.73655	0.71202	0.70683	0.78715	0.80333	0.69529	0.74385	0.78634	0.7664	0.73446	0.71722	0.74597	0.67335	0.73246	0.71696	0.78051	0.68856	0.7276	0.71789	0.80518
GDSC_wsudlcl2	0.75913	0.70327	0.71173	0.72151	0.70224	0.74014	0.71821	0.7165	0.72084	0.69777	0.71151	0.70664	0.70327	0.70419	0.71028	0.71833	0.69851	0.72104	0.72135	0.74799	0.69557	0.75439	0.70825	0.71104	0.70251	0.70796	0.76046	0.70987	0.7819	0.72299	0.68011	0.70127	0.68537	0.70227	0.67005	0.7068	0.70878	0.69712	0.67725	0.67566	0.67977	0.81391	0.7103	0.71261	0.70946	0.76815	0.68964	0.70399	0.69995
GDSC_yapc	0.71039	0.80193	0.77969	0.75356	0.74739	0.77358	0.79879	0.77648	0.77954	0.76032	0.77335	0.76253	0.7536	0.75818	0.74531	0.76284	0.78475	0.73396	0.76774	0.72251	0.76486	0.72834	0.77867	0.73133	0.77447	0.77911	0.70439	0.75631	0.72099	0.73976	0.78421	0.76687	0.75229	0.75715	0.72436	0.81192	0.76173	0.77557	0.78148	0.77497	0.78769	0.70551	0.78205	0.76823	0.75308	0.70553	0.80504	0.77937	0.74546
GDSC_yh13	0.70355	0.77312	0.71184	0.72641	0.81415	0.78304	0.76126	0.77178	0.78636	0.80579	0.79544	0.79375	0.77912	0.8018	0.76679	0.78561	0.74617	0.75069	0.7875	0.70894	0.7748	0.7147	0.76849	0.75758	0.77246	0.72613	0.6889	0.78631	0.70319	0.74901	0.71471	0.71334	0.78272	0.82054	0.68632	0.74711	0.79085	0.76608	0.72657	0.71344	0.74872	0.68481	0.74026	0.72637	0.80025	0.69252	0.73967	0.72706	0.77005
GDSC_ykg1	0.71532	0.77361	0.7395	0.75439	0.79633	0.79565	0.76935	0.77995	0.78818	0.79455	0.79404	0.79524	0.79159	0.81099	0.77493	0.79479	0.758	0.76542	0.80151	0.72747	0.78343	0.72861	0.78195	0.76192	0.77783	0.74394	0.69927	0.78125	0.72221	0.76488	0.73797	0.73032	0.78336	0.81827	0.717	0.76525	0.78998	0.78182	0.737	0.72948	0.75117	0.69881	0.75235	0.7447	0.79443	0.70817	0.74495	0.74657	0.7824
GDSC_zr7530	0.70347	0.7512	0.7809	0.77437	0.7266	0.76041	0.76929	0.75344	0.74876	0.72683	0.74032	0.73455	0.73206	0.73602	0.73371	0.74476	0.74755	0.729	0.74889	0.73017	0.74751	0.72646	0.75282	0.72651	0.73886	0.76614	0.69912	0.72417	0.7173	0.745	0.74704	0.80436	0.71711	0.73479	0.73111	0.76613	0.73268	0.73684	0.73104	0.74235	0.74621	0.70446	0.786	0.81792	0.74226	0.70653	0.75294	0.76313	0.73158
[truncated: 509 more columns]

## Sheet: 6c
Drug	Drug Alias	No_of_common_cell_lines	AUC_Cor.coef	p.value
Trametinib		240	0.66	0
Dasatinib		184	0.65	0
Tozasertib	vx-680	10	0.62	0.0602
AZD7762		460	0.52	0
Belinostat		248	0.52	0
Sepantronium_bromide	ym-155	442	0.52	0
SN-38		427	0.51	0
Vorinostat		445	0.51	0
Saracatinib		193	0.5	0
SNX-2112		509	0.48	0
BMS-536924		501	0.46	0
Daporinad		427	0.46	0
Navitoclax		449	0.45	0
PHA-793887		506	0.45	0
Dabrafenib		230	0.43	0
MK-2206		398	0.43	0
Tanespimycin		463	0.42	0
TPCA-1		502	0.41	0
Nutlin-3a_(-)	nutlin-3	444	0.4	0
NVP-TAE684		179	0.4	0
Pevonedistat		377	0.4	0
Sunitinib		182	0.4	0
Axitinib		453	0.39	0
Fedratinib	tg-101348	498	0.39	0
Afatinib		457	0.38	0
PI-103		494	0.38	0
Pictilisib	GDC-0941	530	0.38	0
Rapamycin	sirolimus	169	0.37	0
AZD8055		457	0.36	0
BMS-754807		484	0.36	0
Gemcitabine		443	0.36	0
AZD6482		536	0.35	0
Selumetinib		509	0.35	0
Bosutinib		443	0.34	0
PLX-4720		508	0.34	0
BMS-345541		489	0.33	0
PIK-93		483	0.33	0
Cabozantinib		479	0.32	0
Idelalisib	CAL-101	497	0.32	0
MG-132		79	0.3	0.0083
Erlotinib		162	0.29	0.0002
Etoposide		482	0.29	0
GW843682X	GW-843682X	163	0.29	0.0002
Linsitinib		483	0.29	0
Entinostat		178	0.28	0.0001
Temsirolimus		234	0.28	0
Obatoclax_Mesylate	obatoclax	488	0.27	0
Tubastatin_A	tubastatin a	249	0.27	0
Dactolisib	nvp-bez235	332	0.26	0
Gefitinib		432	0.26	0
YK-4-279	yk 4-279	443	0.26	0
Bortezomib		175	0.25	0.0007
Crizotinib		182	0.25	0.0006
Doxorubicin		494	0.24	0
Masitinib		479	0.24	0
SB52334	sb-525334	497	0.24	0
TGX221	tgx-221	182	0.24	0.0013
OSI-027		504	0.22	0
Paclitaxel		184	0.22	0.0027
ZSTK474		485	0.22	0
JQ1	JQ-1	535	0.21	0
Sorafenib		186	0.21	0.0042
OSI-930		406	0.2	0
Pazopanib		475	0.18	0.0001
Quizartinib		490	0.18	0.0001
Olaparib		517	0.17	0.0001
PAC-1		462	0.17	0.0003
QS11	qs-11	132	0.17	0.0472
KU-55933		442	0.16	0.0009
Ruxolitinib		501	0.16	0.0003
BI-2536		190	0.15	0.0417
CHIR-99021		513	0.15	0.0004
Nilotinib		425	0.15	0.0015
TW_37	tw-37	487	0.15	0.0007
UNC0638		520	0.14	0.0017
Parthenolide		163	0.13	0.0926
Bexarotene		469	0.11	0.0154
Tivozanib		486	0.1	0.0222
Selisistat	EX-527	470	0.06	0.208
Tamoxifen		499	0.04	0.3249
Lapatinib		165	0.02	0.8411
Imatinib		184	0.01	0.8945
Serdemetan		460	0.01	0.7814
Docetaxel		215	-0.02	0.7469
Veliparib		466	-0.02	0.5928
Linifanib		503	-0.08	0.0717

## Sheet: 6d
Cell_line	Should_match_cell_line	Match_correlation	Actual_best_correlated_cell_line	Best_correlation
CTRP_ga10	GDSC_ga10	0.82876	GDSC_bl41	0.83354
CTRP_hcc1143	GDSC_hcc1143	0.81169	GDSC_te10	0.82021
CTRP_hcc1806	GDSC_hcc1806	0.8627	GDSC_hcc1143	0.86364
CTRP_hcc827	GDSC_hcc827	0.82729	GDSC_lclc97tm1	0.84175
CTRP_hs940t	GDSC_hs940t	0.79876	GDSC_hs578t	0.83121
CTRP_ishikawaheraklio02er	GDSC_ishikawaheraklio02er	0.79838	GDSC_mfe319	0.83627
CTRP_kyse180	GDSC_kyse180	0.83644	GDSC_kyse520	0.83903
CTRP_lovo	GDSC_lovo	0.78432	GDSC_ls411n	0.83571
CTRP_mdamb157	GDSC_mdamb157	0.80149	GDSC_gi1	0.81115
CTRP_ncih1395	GDSC_ncih1395	0.79516	GDSC_ncih1435	0.79752
CTRP_ncih2009	GDSC_ncih2009	0.83199	GDSC_lclc97tm1	0.83438
CTRP_ncih2126	GDSC_ncih2126	0.70381	GDSC_ncih2110	0.81919
CTRP_raji	GDSC_raji	0.8204	GDSC_namalwa	0.82277
CTRP_rh18	GDSC_rh18	0.78685	GDSC_dkmg	0.81295
CTRP_skco1	GDSC_skco1	0.76772	GDSC_ls513	0.82649
CTRP_te11	GDSC_te11	0.83981	GDSC_kyse520	0.84648
GDSC_hcc1143	CTRP_hcc1143	0.81169	CTRP_hcc1806	0.86364
GDSC_hs940t	CTRP_hs940t	0.79876	CTRP_ncih2452	0.80911
GDSC_ishikawaheraklio02er	CTRP_ishikawaheraklio02er	0.79838	CTRP_769p	0.81043
GDSC_ncih1395	CTRP_ncih1395	0.79516	CTRP_hcc1395	0.85638
GDSC_ncih2126	CTRP_ncih2126	0.70381	CTRP_eheb	0.84829
GDSC_rh18	CTRP_rh18	0.78685	CTRP_rd	0.79884
GDSC_skco1	CTRP_skco1	0.76772	CTRP_kyse450	0.85958
GDSC_vmcub1	CTRP_vmcub1	0.83274	CTRP_t24	0.85089
