# Supplementary material for: Expression Levels of Therapeutic Targets as Indicators of Sensitivity to Targeted Therapeutics
Source: Oxford University Press journal article supplement (doi:10.1158/1535-7163.mct-19-0273), 2019-08-29
Supplement: 15357163mct190273-sup-218852_2_supp_5690695_pvr7cq.xlsx [file 15357163mct190273-sup-218852_2_supp_5690695_pvr7cq.xlsx]

## Sheet: Sheet1
Genesymbols	968	16-beta-bromoandrosterone	1S,3R-RSL-3	3-Cl-AHPC	A-804598	AA-COCF3	abiraterone	ABT-199	ABT-737	AC55649	afatinib	AGK-2	alisertib	alvocidib	AM-580	apicidin	AT-406	AT13387	AT7867	austocystin_D	avicin_D	avrainvillamide	axitinib	AZ-3146	azacitidine	AZD1480	AZD4547	AZD6482	AZD7545	AZD7762	AZD8055	B02	bafilomycin_A1	barasertib	bardoxolone_methyl	Bax_channel_blocker	BCL-LZH-4	BEC	belinostat	bendamustine	betulinic_acid	bexarotene	BI-2536	BIBR-1532	BIRB-796	birinapant	BIX-01294	blebbistatin	bleomycin_A2
A1BG	0.04	0.1	0.21	0.11	-0.05	0.11	-0.17	0.18	0.09	0.04	-0.19	0	0.11	0.2	0.1	0.2	0.13	0.14	0.22	-0.15	0.15	0.19	0.23	0	0.04	0.1	0.2	0.09	0.08	0.11	0.11	0.18	0.1	0.14	0.11	0.11	-0.06	-0.02	0.16	0.23	-0.07	0.06	0.2	0.04	0.08	0.01	0.23	-0.12	-0.01
A1BG-AS1	-0.02	0.05	0.1	0.04	-0.01	0.06	-0.04	0.09	0	0.01	-0.1	-0.03	0.08	0.15	0.05	0.09	0.08	0.1	0.13	-0.11	0.07	0.12	0.16	0.01	0.03	0.07	0.11	0.09	0.03	0.05	0.12	0.1	0.13	0.1	0.03	0.11	-0.06	-0.04	0.07	0.17	-0.02	0.01	0.12	0.01	0.03	0.05	0.16	-0.12	0.03
A1CF	0.01	-0.04	-0.07	-0.06	-0.05	0	0	-0.05	-0.05	-0.03	0.13	-0.04	-0.06	0.06	-0.08	-0.02	-0.05	0.07	-0.11	0.03	-0.09	-0.06	-0.11	0.02	0	-0.08	-0.09	-0.06	-0.04	-0.05	0	-0.05	0.02	-0.06	0	-0.04	-0.01	0.04	0.06	-0.1	0.02	-0.02	-0.05	-0.05	0	0.03	0	-0.01	-0.01
A2M	0.06	0.04	-0.09	-0.04	-0.05	-0.01	-0.05	-0.02	0.01	-0.06	-0.06	-0.07	-0.08	0.04	0	0.01	0	0	0.02	-0.03	-0.04	0	-0.01	0.02	-0.06	0.02	0.06	0.03	-0.06	-0.02	-0.02	-0.03	0.11	0.02	-0.03	0.12	0.08	-0.01	-0.01	-0.01	-0.02	0.03	0	-0.02	-0.04	0.02	0.09	0.01	-0.06
A2M-AS1	0.02	0.05	0.06	0.08	0.04	0.09	-0.09	0.09	0.08	0.01	0.06	0	0.09	0.12	0.07	0.13	0.07	0	0.04	0.06	-0.03	0.14	0.08	0.08	0	0.13	0.03	0.01	0.04	0.06	0.05	0.01	-0.03	0.08	0.09	0.08	-0.03	0.03	0.11	0.06	0.02	0.07	0.14	0.1	0.09	-0.01	0.08	-0.07	0.04
A2ML1	0.06	0.03	-0.03	0.05	-0.02	0.05	0.04	0	0	0.01	0.13	0.06	0.04	0.02	0.07	0.04	0.01	0.01	-0.04	0.02	-0.04	-0.01	-0.04	0.03	-0.03	-0.05	-0.07	0.01	0.04	0.05	0.01	0.02	-0.27	0.04	0.01	-0.02	0.01	-0.01	0.01	0.1	0.05	-0.01	0.02	-0.02	0.02	0.05	-0.08	-0.02	0.08
A4GALT	0.02	-0.06	-0.05	-0.07	0.09	-0.05	0.12	-0.06	-0.07	-0.01	0.1	-0.01	-0.06	-0.13	0.01	-0.09	-0.03	-0.07	-0.11	0.01	-0.03	-0.06	-0.18	-0.04	-0.08	-0.11	-0.12	-0.02	0	-0.04	-0.03	-0.1	0.05	-0.13	-0.04	-0.1	0.03	0.04	-0.18	-0.09	0.05	-0.04	-0.13	-0.05	-0.03	0.06	-0.15	0.05	0.08
A4GNT	0.04	0.06	0.05	0.11	-0.02	0.11	-0.04	0.08	0.05	0.02	0.09	-0.06	0.08	0.12	0.07	0.19	-0.03	0.15	0.01	-0.03	0.02	0.07	0.03	0.07	0.14	-0.03	-0.01	0.03	0.05	0.1	0.09	0.06	0.08	0.11	0.09	0.09	-0.02	-0.07	0.21	0.13	0.02	0.1	0.12	0	0.08	0.04	0.12	0.08	0.07
AAAS	0.02	0.02	0.12	0.19	-0.05	0.13	-0.09	0.03	0.06	0.02	-0.05	0	0.22	0.17	0.12	0.18	-0.12	0.18	0.1	-0.04	0.04	0.07	0.16	0.15	0.07	0.08	0.07	0	0.16	0.17	0.16	0.1	0.19	0.15	0.19	0.07	0.03	0.02	0.18	0.13	0.03	0.05	0.26	0.13	0.13	-0.03	0.05	-0.02	0.01
AACS	-0.18	0	-0.08	-0.03	-0.04	0	0.01	-0.04	-0.03	-0.08	0.16	-0.01	-0.04	0.02	-0.07	0.02	-0.03	-0.04	-0.12	0.24	-0.14	0.04	-0.07	0.03	-0.03	-0.05	-0.1	-0.06	-0.07	-0.05	0.02	-0.03	0.11	-0.01	-0.01	0.03	-0.1	-0.04	0.15	-0.06	0	-0.09	-0.05	0.03	0.06	-0.08	-0.01	-0.02	-0.04
AACSP1	0.14	0.07	-0.05	-0.01	-0.04	0.05	-0.08	0.11	0.07	0	0.04	0.03	0.03	0.12	0.03	0.12	0.02	0.06	0.02	0.03	-0.16	0.08	0.01	0.02	0.07	0	0	-0.04	0	-0.01	0.06	0.04	-0.15	0.02	0.08	0.02	-0.1	0.09	0.18	0.03	0	0.09	0.06	-0.01	0.03	-0.02	0.08	0.05	-0.05
AADAC	-0.06	-0.06	-0.17	-0.05	0.05	-0.03	0.04	-0.09	-0.09	-0.04	0.09	-0.03	-0.04	-0.04	-0.06	-0.11	-0.01	0.01	-0.13	0.06	-0.03	-0.07	-0.16	-0.03	-0.03	-0.09	-0.14	-0.12	0	-0.05	-0.04	-0.1	0.18	-0.04	-0.05	-0.08	0.04	-0.01	-0.09	-0.07	-0.01	-0.06	-0.1	-0.06	-0.04	0.07	-0.12	0.09	0.07
AADACL2	0.03	0.07	0.05	0.09	0.04	0.07	-0.07	0	0.06	0	0.03	-0.01	0.05	0.19	0.01	0.11	0.02	0.14	0.06	-0.04	0	0.07	0.03	0	0.04	0.07	-0.03	0.03	0.05	0.1	0.08	0.1	-0.11	0.03	0.06	0.03	-0.09	0.07	0.19	0.09	0	0.08	0.12	-0.04	0.02	-0.03	0.09	0.14	0.02
AADAT	-0.05	-0.07	-0.16	-0.07	0.02	-0.14	0.15	-0.12	-0.08	-0.02	-0.06	0.02	-0.12	-0.15	-0.1	-0.2	0.01	-0.14	-0.11	0.18	-0.09	-0.15	-0.07	-0.1	-0.08	-0.09	0	-0.1	-0.06	-0.17	-0.15	-0.07	-0.09	-0.09	-0.16	-0.01	0	0.01	-0.17	-0.09	0.03	-0.13	-0.13	-0.07	-0.16	-0.09	-0.12	-0.08	-0.06
AAED1	-0.06	-0.08	-0.1	-0.14	-0.02	-0.16	0.03	-0.18	-0.22	-0.01	-0.23	-0.04	-0.25	-0.25	-0.1	-0.32	0.01	-0.24	-0.09	-0.21	0.14	-0.26	-0.17	-0.22	-0.05	-0.18	-0.04	-0.06	-0.03	-0.18	-0.14	-0.14	-0.09	-0.27	-0.18	-0.16	0.06	0.04	-0.4	-0.11	0.02	-0.09	-0.21	-0.13	-0.18	0.04	-0.23	0.06	0.02
AAGAB	0.04	-0.03	-0.15	0.01	0.07	-0.03	0.12	-0.09	-0.1	-0.05	0.12	0.01	-0.04	0.02	-0.05	-0.02	0	0.02	-0.05	0.07	-0.11	-0.05	-0.05	0	-0.02	-0.07	-0.1	-0.08	0.06	-0.03	0	0	-0.01	-0.01	0.01	0.02	0.03	-0.18	0.04	-0.08	-0.06	-0.02	0.07	-0.01	-0.04	0.04	-0.03	-0.1	0
AAK1	0.1	0.03	0.02	0.02	-0.01	0	0	-0.02	0.02	0.07	-0.03	0.06	0	-0.02	0.02	0.01	0.03	-0.07	0.01	-0.16	0.04	0	0.03	-0.06	0.01	-0.06	0.1	0.05	-0.06	0.03	-0.05	-0.02	-0.4	-0.02	-0.04	-0.01	-0.02	-0.03	-0.13	0.05	-0.04	0.01	-0.04	-0.05	-0.04	0.05	-0.01	0.05	0.08
AAMDC	0.07	-0.08	0.07	-0.16	0.01	-0.08	0.07	-0.06	-0.02	0.04	-0.07	0.03	-0.09	-0.28	-0.07	-0.13	-0.04	-0.13	-0.01	-0.13	0.13	-0.04	0	-0.11	-0.1	0.04	0.09	0	-0.1	-0.1	-0.08	-0.04	-0.18	-0.1	-0.11	-0.06	0.05	-0.01	-0.24	-0.09	-0.05	-0.13	-0.16	-0.04	-0.08	-0.03	-0.08	0	-0.12
AAMP	0.04	-0.01	-0.07	-0.04	-0.03	0.02	0	-0.14	-0.09	-0.02	-0.02	-0.06	-0.04	-0.04	-0.08	-0.01	-0.08	-0.04	-0.11	0.07	-0.1	-0.12	-0.08	-0.05	-0.08	-0.11	-0.07	-0.09	0.04	-0.06	-0.04	-0.05	0.22	-0.07	-0.01	-0.04	0.05	-0.04	0.01	-0.04	0.08	-0.08	-0.01	-0.05	-0.02	-0.02	-0.06	0.1	-0.09
AANAT	0.11	0	0.08	0.03	0.03	0.04	-0.04	-0.01	0.04	0.07	-0.02	0.02	0.1	0.03	0.01	0.04	-0.01	0.06	0.06	-0.03	0	0.11	0.09	0.03	0.03	0.11	0.08	0.11	0.01	0.06	0.09	0.01	-0.13	0.07	-0.02	0.02	-0.03	-0.01	0.01	0.11	0.06	0	0.08	-0.02	0.01	-0.02	0.1	-0.02	-0.03
AAR2	0.13	0.02	0.01	-0.05	-0.01	0	-0.08	-0.11	-0.06	-0.03	-0.04	-0.01	-0.07	0.04	0.03	0.04	-0.12	0.01	0.02	-0.05	-0.04	-0.06	-0.01	0	0.03	-0.03	0.04	0.05	0.03	0.01	0.05	-0.01	0.04	-0.08	0	0.02	-0.08	-0.02	0	0.02	-0.02	-0.01	0	-0.01	0.03	-0.04	0.02	0.08	-0.09
AARS	-0.14	0.02	0.02	0.14	-0.02	0.09	-0.07	0.01	0	-0.04	0.03	0.03	0.13	0.12	0.04	0.12	-0.03	0.09	-0.02	-0.08	0.07	0.03	0.04	0.09	0.08	0.01	0.02	-0.05	0.08	0.14	0.06	0.08	-0.03	0.06	0.14	0.07	0.05	0.06	0.1	0.02	0.04	0.04	0.14	0.07	0.08	-0.01	0.01	-0.15	0.1
AARS2	0.07	0.14	0.14	0.26	-0.05	0.15	-0.19	0.23	0.25	0.04	0.04	-0.02	0.23	0.35	0.09	0.34	0.12	0.26	0.18	0.02	-0.07	0.23	0.22	0.18	0.14	0.12	0.09	0.07	0.22	0.22	0.17	0.18	0.11	0.24	0.22	0.26	-0.13	0.01	0.41	0.2	-0.05	0.18	0.38	0.1	0.15	0.03	0.28	0.06	0.02
AARSD1	0.07	0.11	0.14	0.3	0.03	0.08	-0.04	0.14	0.14	0.03	0.01	0	0.29	0.28	0.05	0.28	0.07	0.31	0.21	0	-0.04	0.21	0.26	0.21	0.09	0.2	0.16	0	0.19	0.26	0.15	0.18	0.01	0.24	0.25	0.14	-0.13	0.02	0.4	0.21	-0.02	0.12	0.4	0.1	0.17	-0.01	0.19	0.03	0.06
AASDH	-0.17	0.05	0.09	0.21	0.08	0.11	0.04	0.14	0.11	0.06	0.1	-0.02	0.2	0.18	0.08	0.22	0.02	0.21	0.1	0	0.06	0.18	0.12	0.12	0.1	0.04	0.11	0.01	0.08	0.2	0.09	0.16	0.16	0.17	0.17	0.17	-0.1	-0.03	0.27	0.14	-0.03	0.13	0.24	0.1	0.1	-0.04	0.16	-0.2	0.11
AASDHPPT	0.04	0.07	0.14	0.2	0.01	0.14	0.02	0.1	0.08	0.04	-0.07	0.02	0.17	0.21	0.07	0.15	0.06	0.21	0.1	-0.07	0.13	0.08	0.16	0.1	0.07	0.05	0.09	-0.02	0.15	0.08	0.12	0.14	0.18	0.12	0.19	0.09	-0.12	0.04	0.22	0.13	0.03	0.1	0.26	0.18	0.08	-0.01	0.1	0.06	0.02
AASS	-0.03	-0.05	-0.04	-0.03	-0.02	-0.08	0.03	-0.12	-0.13	-0.03	-0.21	-0.06	-0.09	-0.03	-0.01	-0.08	-0.06	-0.05	0.02	-0.1	0.03	-0.11	0	-0.03	0	-0.04	0.03	-0.01	-0.01	-0.08	-0.02	-0.05	-0.09	-0.06	-0.06	-0.08	-0.02	0.03	-0.12	-0.05	-0.02	-0.05	-0.06	-0.01	-0.12	-0.01	-0.07	-0.05	-0.01
AATF	0	0.07	0.07	0.14	-0.16	0.08	-0.19	0.06	0.02	0.03	-0.04	-0.04	0.14	0.14	0.05	0.13	0.03	0.11	0.1	-0.1	0.06	0.05	0.08	0.13	0.07	0.02	-0.02	-0.01	0.14	0.12	0.07	0.04	0	0.09	0.11	0.07	-0.04	-0.01	0.14	0.03	0.02	0.05	0.22	0	0.06	0.02	0.03	0.01	0.03
AATK	0.1	0	-0.14	-0.03	-0.05	-0.04	0.06	-0.09	-0.06	0.03	0.08	-0.02	-0.04	0.04	-0.13	-0.06	-0.05	-0.05	-0.14	0.23	-0.16	-0.07	-0.12	-0.05	-0.04	-0.16	-0.11	-0.09	-0.01	-0.09	-0.07	-0.12	0.14	-0.02	-0.1	0	-0.07	0	0.03	-0.06	0.08	-0.01	-0.01	-0.08	-0.03	-0.04	-0.06	0.11	0
ABAT	0.03	0.07	0.1	-0.01	0.05	0.07	0.04	0.04	0.04	-0.04	0.21	0.06	0.05	0.08	0.08	0.1	-0.12	0.1	0.03	0.15	0.05	0.14	0.06	0.1	-0.04	0.1	0.03	0.06	0	0.04	0	0.05	0.07	0.08	0.05	0.08	0.05	0.04	0.14	0	-0.02	0.04	0.05	0.07	0.06	-0.02	0.09	0.07	0
ABCA1	0.01	-0.13	0.04	-0.17	-0.01	-0.12	0.05	-0.09	-0.14	0	-0.1	-0.04	-0.17	-0.18	-0.06	-0.17	-0.03	-0.1	-0.06	-0.24	0.15	-0.08	-0.1	-0.14	-0.01	-0.1	0.04	0.03	-0.07	-0.04	-0.07	-0.12	-0.14	-0.16	-0.12	-0.13	-0.02	0	-0.26	-0.12	0.01	-0.02	-0.22	-0.08	-0.12	0.01	-0.18	-0.02	0.01
ABCA11P	0.04	0.06	0.03	0.07	0.09	0.08	0.09	0	0.01	0.03	0.01	-0.02	0.1	0.07	0.03	0.03	-0.01	0.19	0.07	-0.05	0.1	0.04	0.08	0.02	0.03	0	0.01	0.07	-0.02	0.04	0.08	0.1	0.13	0.07	0.08	0.02	-0.06	-0.06	0.08	0.03	0.04	0.04	0.11	0.07	0.05	-0.03	0.02	-0.06	0.08
ABCA12	-0.11	-0.02	-0.11	-0.04	0.04	-0.02	0.02	0.04	0	0.03	0.3	0.01	-0.03	-0.06	-0.05	-0.05	0	-0.08	-0.13	0.19	-0.16	0	-0.18	-0.06	-0.04	-0.15	-0.18	0.04	-0.08	-0.1	-0.07	-0.07	-0.08	-0.03	-0.12	-0.08	0.03	0.02	-0.03	-0.05	0.03	-0.1	-0.11	-0.07	-0.03	-0.01	-0.09	0.1	0.09
ABCA13	0.05	-0.02	-0.03	-0.02	0.01	0.02	-0.08	-0.01	0.05	-0.02	0.08	0.04	0.01	-0.04	0.02	-0.01	-0.05	0.02	-0.05	-0.01	0.07	0	-0.08	-0.01	-0.04	0	0.01	-0.02	-0.01	-0.03	-0.05	-0.03	-0.14	-0.04	-0.07	-0.04	0.05	-0.12	-0.09	-0.02	0.01	-0.01	-0.06	0	-0.01	-0.02	-0.02	0	0.07
ABCA17P	0.21	0.05	-0.01	0.01	-0.05	-0.01	-0.12	-0.05	0.01	0.01	-0.01	-0.01	-0.03	0.04	-0.01	-0.01	-0.04	-0.01	-0.07	0.06	-0.05	0	-0.05	0	-0.1	0.02	-0.07	-0.03	-0.04	-0.06	-0.03	-0.03	-0.04	-0.09	-0.03	-0.03	0.03	0.16	0.05	-0.04	0.05	-0.03	-0.03	0	0.01	-0.02	-0.02	0.13	-0.06
ABCA2	0.04	-0.04	-0.15	-0.08	-0.06	-0.03	-0.04	-0.05	-0.05	0.04	0	0.08	-0.08	-0.09	-0.02	-0.07	-0.07	-0.11	-0.02	0.1	-0.11	-0.05	-0.04	0.03	0.02	-0.04	-0.04	-0.08	-0.04	-0.08	-0.06	-0.06	0.26	-0.05	-0.11	-0.03	0.05	-0.05	-0.08	-0.09	0.03	-0.03	-0.1	-0.07	-0.01	-0.02	-0.07	0.01	-0.08
ABCA3	0.05	0.08	0.04	-0.02	0.01	0	0.02	0.02	0.06	0.07	-0.05	0.07	0.02	-0.05	-0.02	-0.04	-0.03	-0.08	-0.04	0.02	-0.12	0.18	0.07	0.09	0.06	0.12	-0.06	-0.08	0.03	-0.1	-0.03	0.02	0.15	-0.01	0.01	0.05	0.02	0.03	0.09	-0.05	0.04	-0.03	0.05	0.08	0.12	-0.09	0.01	0.12	-0.08
ABCA4	0.15	-0.02	-0.01	-0.01	0.01	0.03	0.04	0.07	0.04	-0.02	0.12	0.04	0.02	-0.03	0.04	-0.01	0.04	-0.05	-0.06	0.13	-0.01	-0.03	-0.02	-0.02	0.04	0.01	-0.05	-0.05	-0.03	-0.02	0.02	0.02	-0.06	-0.04	0.02	-0.01	0.08	0.04	-0.03	-0.05	0.02	0	-0.05	-0.02	0	0.08	-0.09	0.11	-0.01
ABCA5	-0.04	0.03	-0.12	-0.08	0.05	-0.03	0.06	-0.04	-0.02	0.03	0.02	0.01	-0.11	0.08	0.04	-0.01	-0.06	-0.03	-0.07	0.11	-0.16	-0.02	-0.09	-0.06	-0.02	-0.01	-0.02	0.06	-0.09	-0.12	-0.01	-0.08	-0.15	-0.06	-0.04	0.01	-0.13	0.03	0.05	-0.03	-0.01	0.07	-0.08	0.01	-0.01	-0.08	0.05	0.01	-0.01
ABCA6	-0.14	0.03	0.06	0.09	-0.1	0.14	-0.14	0.07	0.02	-0.04	-0.05	-0.01	0.07	0.11	0.09	0.1	-0.08	0.22	0.07	-0.08	0.15	0.07	0.08	0.13	0.04	0.09	0.09	0.08	0.01	0.13	0.12	0.09	0.16	0.06	0.12	0.05	-0.05	0.04	0.07	0.04	0	0.08	0.09	0.12	0.08	-0.03	0.08	-0.06	0.11
ABCA7	0.07	0.11	0	0.13	0.02	0.14	-0.02	0.04	0.09	0.01	0.18	0.03	0.17	0.17	0.07	0.21	0	0.19	-0.01	0.08	0.08	0.15	0.02	0.19	0.07	0.01	-0.07	0.01	0.15	0.16	0.09	0.09	0.25	0.17	0.18	0.09	0.04	-0.02	0.29	0	0.03	0.1	0.17	0.06	0.12	0.11	0.1	0.03	0.06
ABCA8	0	0.04	0.08	-0.01	0.04	0.04	-0.08	0.04	0.07	-0.03	-0.13	0.04	0.02	0.05	0.05	0.07	-0.01	0.06	0.1	-0.15	0.03	0.05	0.11	0	0.05	0.04	0.16	0.09	-0.01	0.01	0.1	0.11	-0.17	-0.02	0	0.06	-0.07	-0.04	0.02	0.07	0.05	0.04	0.05	0.09	0.05	-0.09	0.1	-0.02	0.02
ABCA9	-0.02	0.06	0.07	0.07	-0.08	0.15	-0.14	0.07	0.04	-0.04	0.03	0.01	0.06	0.25	0.02	0.12	-0.06	0.24	0.08	-0.1	-0.03	0.09	0.07	0.11	0.04	-0.02	0.07	0.06	0.03	0.12	0.13	0.09	0.07	0.08	0.1	0.12	-0.12	0.04	0.11	0.08	0.02	0.1	0.08	0.03	0.08	0.03	0.19	0.04	0.05
ABCB1	0.03	-0.02	0.02	0.03	-0.04	-0.02	-0.07	0.01	0.05	-0.06	-0.09	-0.05	0	-0.02	-0.03	-0.05	0.05	-0.04	0.01	0.08	-0.08	0.02	-0.02	0.02	0.03	0.01	-0.04	-0.11	0.01	0	-0.02	0.04	0.24	-0.07	0.01	0.03	0	0.04	0.07	-0.02	-0.03	-0.08	0.02	-0.02	0	-0.07	0.04	0.07	-0.07
ABCB10	0.04	0.14	0.07	0.27	-0.08	0.2	-0.25	0.18	0.17	0.1	0.01	0.09	0.22	0.24	0.12	0.21	0.07	0.19	0.16	0.01	0.07	0.23	0.24	0.21	0.17	0.19	0.12	-0.04	0.15	0.21	0.19	0.21	0.14	0.18	0.24	0.16	-0.06	0.02	0.22	0.16	0.01	0.11	0.28	0.15	0.15	-0.01	0.19	0.07	0.05
ABCB11	0.06	0.01	0.02	0.05	-0.04	0.12	-0.13	-0.03	0	0.04	0.08	0.03	0.04	0.17	-0.03	0.1	0.01	0.14	0	-0.04	0.01	0.01	0.02	0.04	0	-0.03	-0.01	0	0.05	0.08	0.08	0.03	-0.02	0.07	0.05	0	-0.03	0	0.08	0.03	0.07	0	0.08	-0.04	0.04	0.06	0.08	0.13	0.04
ABCB4	-0.07	0.04	0.1	0.07	-0.09	0.11	-0.16	0.09	0.06	-0.04	-0.09	-0.06	0.07	0.15	-0.01	0.12	0.04	0.11	0.1	-0.01	-0.03	0.07	0.06	0.03	0.06	-0.01	0.08	0.05	0.05	0.1	0.09	0.08	0.11	0.06	0.07	0.09	-0.04	-0.02	0.21	0.09	-0.01	0.06	0.1	0.04	0.05	-0.09	0.17	-0.09	-0.03
ABCB5	0.04	0.04	0	0.04	-0.09	0.06	-0.14	0.02	0.01	-0.03	-0.09	-0.04	0.01	0.18	-0.02	0.13	0.06	0.13	0.1	-0.15	0.02	0.01	0.08	0.01	0.08	-0.03	0.07	0.08	0.1	0.07	0.11	0.07	0.13	0.07	0.07	0.08	-0.05	-0.01	0.15	0.1	0.01	0.1	0.13	0.01	0.05	0.06	0.14	-0.07	-0.01
ABCB6	0.05	-0.09	-0.2	-0.17	0.06	-0.14	0.18	-0.13	-0.11	-0.01	-0.12	-0.08	-0.19	-0.11	-0.09	-0.13	-0.12	-0.22	-0.05	0.1	-0.15	-0.16	-0.11	-0.11	-0.09	-0.04	-0.02	-0.07	-0.07	-0.19	-0.02	-0.12	0	-0.16	-0.08	-0.09	0.01	0.01	-0.09	-0.11	0.07	-0.1	-0.12	-0.04	-0.12	-0.09	-0.12	-0.01	-0.16
ABCB7	-0.09	0.1	0.15	0.27	-0.03	0.1	-0.15	0.2	0.15	0.03	0.12	0.03	0.29	0.31	0.07	0.26	0.05	0.26	0.18	0.03	0.08	0.15	0.22	0.25	0.16	0.16	0.03	0	0.23	0.24	0.12	0.23	0.06	0.28	0.25	0.13	0	0.14	0.39	0.1	-0.03	0.14	0.34	0.18	0.16	0.03	0.14	-0.13	0.02
ABCB8	0.14	0.03	-0.02	-0.05	-0.11	0.02	-0.02	0.04	0.01	-0.01	-0.04	-0.02	-0.02	0.05	-0.02	0.04	-0.01	0.02	0.06	-0.05	-0.03	-0.04	0	0.01	0.03	-0.1	-0.02	0.09	0.12	0	0.12	0	0.05	0.03	-0.01	0.03	0.06	-0.02	0.06	0.07	0.07	-0.03	0.01	-0.04	0.04	0.04	0.07	0.09	-0.06
ABCB9	-0.1	-0.05	-0.07	-0.11	-0.11	-0.04	-0.05	-0.06	-0.16	-0.09	0.02	-0.01	-0.15	0	-0.03	-0.08	-0.08	-0.08	-0.12	0.06	-0.01	-0.09	-0.13	-0.02	-0.02	-0.13	-0.12	0.03	-0.04	-0.12	-0.02	-0.11	0.12	-0.08	-0.13	-0.01	0.04	0.07	0.01	-0.12	-0.01	-0.04	-0.17	-0.02	-0.03	0.02	-0.08	0.09	-0.06
ABCC1	0	-0.09	-0.1	-0.04	0.04	-0.11	0.08	0.02	-0.05	0.01	0.07	0	0.03	-0.17	0	-0.12	-0.11	-0.13	-0.04	-0.07	0.02	-0.1	-0.07	0.01	0	0.01	-0.04	-0.06	-0.05	0.04	-0.08	-0.05	0.09	-0.05	-0.02	-0.09	0.07	0.07	-0.1	-0.08	0.04	0.02	-0.05	-0.05	0	-0.04	-0.18	-0.03	0.04
ABCC10	0.06	-0.05	-0.08	-0.06	0	-0.03	0.11	-0.12	-0.13	-0.04	0.17	0.05	-0.02	0.01	-0.03	-0.04	0	0.07	-0.01	0.07	0.02	-0.09	-0.04	-0.01	-0.02	0	0.03	-0.02	-0.04	-0.01	0.01	-0.03	0.05	0.03	-0.02	0	0.03	-0.17	-0.1	-0.08	-0.05	-0.04	-0.04	-0.05	-0.07	0.11	0	0	0.1
ABCC11	0.02	0.06	0.03	0.06	0.02	0.11	-0.06	0.1	0.01	0.06	0	0	0.01	0.03	-0.02	0.13	-0.03	0.12	0.06	-0.05	0	0.11	0.04	0.02	0.09	0.03	-0.05	-0.1	0.07	0.01	0.04	0.14	0.21	0.02	0.09	0.06	0.1	0.09	0.19	0.08	0.01	0	0.09	0.03	0.06	0.04	0.09	0.02	-0.02
ABCC12	0	0.08	0.18	0.12	0	0.19	-0.09	0.15	0.08	0.06	0.1	-0.03	0.17	0.16	0.11	0.19	0	0.21	0.09	-0.11	0.1	0.12	0.08	0.12	0.11	0.04	0.02	0.1	0.11	0.15	0.17	0.1	0.07	0.12	0.11	0.08	-0.01	0.05	0.22	0.11	0	0.11	0.17	0.01	0.1	0.02	0.14	0.1	0.06
ABCC13	0.08	0.04	0.03	0.03	-0.09	0.11	-0.1	0.09	0.05	0.04	0.12	-0.03	0.06	0.06	0.08	0.1	0.03	0.07	0	0	-0.16	0.01	0.02	0.03	0.07	-0.04	-0.05	-0.04	0	0.06	0.09	0.11	-0.21	0.03	0.09	0	-0.06	0.1	0.09	0.06	0.03	0.02	0.05	0.04	0.06	0.02	0.08	0.08	0.01
ABCC2	-0.02	-0.01	-0.19	-0.09	-0.02	-0.05	0.09	-0.08	-0.09	-0.01	-0.06	-0.02	-0.14	-0.07	-0.05	-0.1	-0.06	-0.18	-0.11	-0.03	-0.05	-0.13	-0.11	-0.06	0.02	-0.09	-0.03	-0.07	0.01	-0.09	-0.08	-0.11	0.12	-0.12	-0.06	-0.01	0.05	0.03	-0.09	-0.14	0.06	-0.02	-0.09	0.01	-0.05	0.06	-0.11	-0.02	-0.12
ABCC3	0	-0.17	-0.28	-0.31	0.05	-0.22	0.18	-0.29	-0.2	-0.02	0.08	-0.02	-0.27	-0.41	-0.19	-0.4	-0.07	-0.3	-0.26	0.08	-0.1	-0.31	-0.37	-0.17	-0.07	-0.2	-0.22	-0.12	-0.2	-0.23	-0.25	-0.33	-0.18	-0.29	-0.28	-0.26	0.06	0.02	-0.37	-0.32	0.08	-0.18	-0.4	-0.21	-0.2	0	-0.36	0.02	-0.06
ABCC4	-0.04	-0.03	0.06	0.02	0	-0.03	0.01	-0.04	0.01	0.05	-0.13	-0.05	0.05	-0.04	0.02	-0.06	-0.04	-0.01	0.05	-0.11	0.08	-0.1	0.02	0.05	0.06	0.03	-0.04	-0.07	0.13	0.02	0.02	-0.02	-0.03	-0.05	0.04	-0.05	0.03	0.03	-0.06	-0.09	0.07	0.07	0.05	0	0	-0.01	-0.14	-0.07	-0.02
ABCC5	-0.01	-0.01	-0.09	0.09	0.04	0.01	-0.01	0.11	0.1	-0.02	0.15	0.02	0.14	0.19	0.09	0.16	0.04	0.13	0.06	0.12	-0.06	0.07	0.11	0.1	0.02	0.09	0.01	-0.01	0.11	0.04	0.06	0.1	-0.09	0.17	0.08	0.04	0.01	-0.05	0.27	0.02	0.03	0.09	0.18	0.09	-0.02	-0.08	0.07	-0.05	0.03
ABCC6	0.05	0.01	0.05	0	0.01	0.05	-0.01	0.02	0.01	0.02	0.09	0	0.01	-0.12	-0.01	0.04	0.01	-0.01	-0.04	0.11	0.05	0.07	-0.03	0.08	0.09	0.03	-0.02	-0.03	0.06	0.05	0.06	-0.02	0.16	-0.01	0.07	0.03	0.14	0.1	0.12	-0.05	0.07	0.03	0.02	-0.01	0.07	0.03	-0.02	0.06	0.02
ABCC8	0.06	0.06	0.1	0.15	0.02	0.1	0.09	0.12	0.11	0.02	0.07	0.02	0.19	0.15	0.08	0.16	0.01	0.12	0.1	0.04	0	0.18	0.17	0.15	0.06	0.07	0.03	0.03	0.06	0.07	0.09	0.16	-0.21	0.17	0.16	0.11	-0.04	-0.05	0.23	0.1	0.03	0.09	0.19	0.07	0.1	-0.03	0.17	-0.05	-0.01
ABCC9	-0.04	0.04	0.16	0.08	-0.01	0.05	-0.03	0.03	0.02	-0.02	-0.02	0.06	0.04	0.02	0.02	0.08	0.01	0.1	0.03	-0.08	0.06	-0.01	0.03	-0.06	0.05	0.01	0.04	0.05	-0.02	0.09	0.06	0.08	-0.13	-0.04	0.06	0.02	0.02	-0.01	0.04	0.1	0.11	0.07	0.07	0	0.01	0.02	0.09	0.02	0.03
ABCD1	0.09	0.03	0.01	-0.03	-0.11	0.05	-0.15	-0.12	-0.05	0.04	-0.12	0	-0.07	0.03	0.05	0.01	-0.07	0.04	-0.03	-0.11	0.04	-0.07	-0.03	-0.04	-0.03	-0.11	0	0.04	-0.01	-0.01	0.02	-0.03	0.21	-0.08	-0.02	-0.03	-0.02	0.09	-0.09	-0.02	0.04	0.03	-0.06	0	0.01	0.04	-0.03	0.13	-0.12
ABCD2	-0.09	0.11	0.19	0.18	-0.01	0.18	-0.25	0.22	0.16	0.02	0.05	-0.03	0.22	0.22	0.16	0.28	0.01	0.26	0.21	-0.03	0.09	0.29	0.21	0.2	0.12	0.24	0.12	0.08	0.09	0.23	0.19	0.2	0.13	0.2	0.23	0.19	-0.04	-0.01	0.33	0.11	-0.05	0.16	0.3	0.15	0.17	-0.06	0.21	0.03	0.13
ABCD3	-0.07	-0.05	-0.08	-0.06	0.07	-0.02	0.21	-0.03	0.01	0	0	0.07	-0.14	-0.15	-0.08	-0.13	-0.05	-0.14	-0.1	0.11	-0.09	-0.14	-0.08	-0.11	-0.03	-0.05	-0.06	-0.09	0.04	-0.14	-0.14	-0.06	0.03	-0.13	-0.03	-0.03	0.14	0.02	-0.14	-0.1	0.05	-0.08	-0.13	0.01	-0.08	0	-0.11	0.01	-0.13
ABCD4	-0.03	0.07	0.07	0.17	0.02	0.16	0	0.14	0.12	0.05	0.12	0.01	0.19	0.13	0.04	0.16	0.05	0.22	0.04	-0.01	0.18	0.18	0.09	0.15	0.08	0.01	-0.02	0.03	0.09	0.15	0.02	0.09	-0.08	0.23	0.15	0.1	-0.09	0	0.25	0.15	0.05	0.07	0.21	0.07	0.1	0.05	0.14	-0.05	0.15
ABCE1	0.03	0.08	0.04	0.28	-0.05	0.11	-0.13	0.11	0.03	0.01	-0.03	-0.05	0.22	0.23	0.11	0.18	0.07	0.26	0.16	-0.02	0.04	0.08	0.22	0.19	0.15	0.14	0.08	0.05	0.2	0.23	0.18	0.17	0.17	0.2	0.22	0.13	-0.09	0.03	0.23	0.11	0	0.14	0.33	0.12	0.14	0.03	0.08	0.04	0.13
ABCF1	0.11	0.1	0.08	0.13	0.02	0.06	-0.17	0.1	0.05	0.04	-0.03	0.05	0.13	0.18	0.09	0.13	0.07	0.11	0.12	-0.02	0	0.04	0.18	0.06	0.11	0.06	0.06	0.01	0.09	0.13	0.08	0.14	0.07	0.12	0.17	0.08	-0.01	-0.1	0.1	0.09	-0.05	0.03	0.17	0.08	0.07	0.09	0.12	0.03	0
ABCF2	0.11	0.02	0.06	0.05	-0.13	0.02	-0.19	0.09	0.01	0.02	-0.17	-0.02	0.07	0.11	0.02	0.03	0.07	0.07	0.13	-0.14	-0.01	0.06	0.06	0.03	0.03	-0.03	0.06	0.11	0.09	0.09	0.11	0.04	0.13	0.07	0.07	0.09	-0.02	-0.04	0.07	0.11	0.01	0.05	0.13	0.03	0.09	-0.03	0.12	0.08	0
ABCF3	-0.05	-0.03	-0.14	-0.1	-0.08	-0.11	-0.11	-0.15	-0.18	-0.08	0.07	-0.04	-0.09	-0.03	0.01	-0.05	-0.07	-0.08	-0.11	0	-0.09	-0.11	-0.13	-0.04	0.02	-0.07	-0.09	0.01	0.01	-0.05	-0.02	-0.09	-0.08	-0.09	-0.08	-0.07	0.04	0	-0.1	-0.1	0.05	0.01	-0.07	-0.08	-0.06	0.01	-0.07	0.03	-0.06
ABCG1	-0.08	0.07	-0.03	0.07	0.08	0.02	-0.05	0.08	0.03	0.02	0.19	0.06	0.08	0.1	0.04	0.09	-0.06	0.1	0.01	0.06	-0.03	0.12	0.03	0.12	0.04	0.08	-0.01	-0.01	0.03	0.07	0.04	0	0.07	0.11	0.08	0.06	-0.01	-0.03	0.14	0.02	-0.05	0.09	0.03	0.07	0.12	-0.08	0.09	0.01	0.04
ABCG2	-0.03	-0.15	-0.21	-0.17	0.01	-0.12	0.05	-0.2	-0.18	-0.06	0.04	0.01	-0.16	-0.12	-0.09	-0.17	0.02	-0.2	-0.18	0.05	-0.07	-0.19	-0.21	-0.15	-0.13	-0.18	-0.05	-0.09	-0.08	-0.12	-0.05	-0.17	0	-0.2	-0.15	-0.06	0.05	-0.09	-0.2	-0.16	0	-0.1	-0.22	-0.1	-0.11	0.07	-0.16	-0.05	-0.01
ABCG4	-0.04	0.01	0	-0.01	-0.03	0.02	-0.05	-0.01	-0.1	0.03	0.07	0.02	-0.03	0.04	-0.08	-0.02	-0.03	0.03	-0.12	0.01	-0.12	-0.01	-0.08	0	0.06	-0.15	-0.1	-0.05	0	-0.04	-0.01	-0.06	0.19	-0.03	0.01	-0.05	-0.08	-0.02	0	-0.04	-0.01	0.02	-0.03	-0.05	0.02	0.01	-0.01	0.08	0.01
ABCG5	-0.07	-0.02	-0.05	0	0	0.02	0.16	0.03	0	-0.06	-0.07	-0.04	-0.01	0.16	-0.04	0.03	0.08	-0.03	-0.01	0	-0.1	-0.03	0.01	-0.02	0.05	-0.07	-0.05	-0.05	-0.01	0	0.02	0.01	0	0	-0.01	0.08	0.02	0.01	0.1	0.07	-0.02	0.05	0.08	0.03	0.01	-0.01	0.09	-0.11	-0.09
ABCG8	0.08	0.05	0.04	0.11	-0.07	0.08	-0.13	0	0.01	-0.02	0.04	-0.01	0.03	0.11	-0.01	0.12	0.02	0.15	0	-0.06	-0.05	-0.01	-0.01	0.05	0.12	-0.08	-0.03	0.07	0.06	0.1	0.14	0.04	-0.02	0.02	0.07	0.05	0.01	0.09	0.12	0.03	0.02	0.06	0.08	-0.02	0.02	0.07	0.09	0.11	0.01
ABHD1	-0.02	0.06	0.09	0.08	-0.05	0.06	-0.1	0.01	0.02	-0.01	0.01	0.07	0.09	0.05	0	0.1	-0.06	0	0.04	0.07	-0.01	0.07	0.08	0.09	0.06	0.07	0	-0.05	0.07	0.07	0.11	0.08	0.03	0.07	0.07	0.05	-0.02	-0.01	0.18	0.07	-0.02	0.05	0.12	0.05	0.06	0	0.08	0.08	-0.03
ABHD10	-0.06	0.05	0.01	0.14	-0.06	0.04	-0.03	0.02	0.03	0	-0.05	-0.06	0.07	0.16	-0.02	0.16	0.02	0.09	0.04	0.08	-0.02	0.08	0.08	0.11	0	0.01	-0.03	-0.03	0.06	0.09	0.02	0.07	0.08	0.1	0.1	0.12	-0.09	0.04	0.23	0.05	-0.08	0.08	0.17	0.07	0.05	-0.01	0.12	-0.09	-0.03
ABHD11	-0.06	-0.06	-0.24	-0.18	-0.04	-0.1	0.13	-0.16	-0.17	-0.09	0.11	-0.03	-0.19	-0.18	-0.12	-0.2	-0.07	-0.18	-0.22	0.24	-0.17	-0.2	-0.3	-0.1	-0.09	-0.23	-0.27	-0.07	-0.05	-0.24	-0.14	-0.19	0.07	-0.19	-0.2	-0.13	0.12	-0.08	-0.13	-0.17	0.11	-0.14	-0.23	-0.15	-0.11	0.02	-0.16	0.09	-0.12
ABHD12	-0.04	-0.1	-0.2	-0.33	-0.02	-0.18	0.12	-0.2	-0.1	-0.06	0.01	0.06	-0.34	-0.35	-0.12	-0.26	-0.15	-0.31	-0.16	0.02	-0.11	-0.2	-0.25	-0.15	-0.12	-0.16	-0.09	-0.06	-0.14	-0.28	-0.18	-0.26	-0.09	-0.28	-0.24	-0.17	0.07	-0.03	-0.34	-0.2	-0.02	-0.16	-0.37	-0.13	-0.09	-0.05	-0.21	-0.02	-0.2
ABHD12B	0.03	0	-0.03	0.05	0.05	0.05	0.04	0	0.01	-0.04	0.04	-0.06	0.1	0.07	0	0.04	0.04	0.09	-0.03	-0.03	-0.04	-0.08	-0.03	0	0.07	-0.06	-0.02	0.02	0.02	0.05	0.05	0.06	-0.08	0.01	-0.02	0.02	-0.05	0.15	0.07	0.07	0.04	0.03	0.05	-0.03	0.03	0.06	-0.02	0.06	0.04
ABHD13	-0.06	0.03	0	0.13	0	0.07	0.03	0.06	0.14	-0.03	0	-0.08	0.04	0.22	0.01	0.15	0.06	0.21	0.14	0.06	-0.01	0.1	0.14	0.12	0.06	0.07	0.07	-0.05	0.11	0.11	0.07	0.1	-0.11	0.15	0.14	0.14	-0.15	0.06	0.23	0.1	-0.05	0.07	0.16	0.05	0.01	0.01	0.13	-0.05	0.04
ABHD14A	0.14	0.06	0.12	0.13	-0.1	0.11	-0.1	0.12	0.15	0.02	-0.08	0.05	0.11	0.2	0.08	0.18	0	0.19	0.13	-0.02	0.05	0.16	0.19	0.17	0.06	0.11	0.16	0.02	0.11	0.11	0.1	0.15	0.21	0.18	0.18	0.11	-0.03	-0.01	0.21	0.12	-0.01	0.09	0.21	0.06	0.14	0.04	0.17	-0.01	-0.02
ABHD14B	0.01	0.04	0.09	0.06	-0.12	0.13	-0.21	0.04	-0.01	-0.02	-0.01	0.02	0.04	0.14	0.02	0.15	0.02	0.06	0.07	-0.06	0.08	0.08	0.05	0.16	0.11	-0.02	0.03	-0.04	0.07	0.12	0.07	0.07	0.24	0.09	0.11	0.07	0.02	0.01	0.08	0.04	-0.01	0.05	0.11	0.01	0.1	0.01	0.11	-0.02	-0.03
ABHD15	-0.05	0.06	-0.02	0.02	-0.14	0.14	-0.28	0.16	0.07	0.02	0.04	0.07	0.08	0.02	0.12	0.03	0.03	0.04	0.05	-0.11	0.14	0.14	0.03	0.13	0.07	0.05	-0.02	0.07	0.01	0.04	0.05	0.02	-0.03	0.08	0.02	0.04	0.03	-0.14	0	0.02	0.04	0.09	0.03	0.02	0.09	0.06	0.04	-0.08	0.05
ABHD16A	0.1	0	-0.09	-0.06	-0.06	-0.01	0	-0.02	0.07	-0.05	0.09	0.07	-0.02	-0.03	-0.02	0.06	0.03	0.02	0.05	0.07	-0.05	0.03	0.03	0.09	0.02	0.03	-0.01	-0.06	0.03	-0.01	-0.03	0	0.32	0.06	0.02	0.07	0.12	-0.04	0	-0.01	-0.03	-0.1	0	-0.04	0	0.18	0.08	0.03	-0.06
ABHD16B	0.15	0.09	0.07	0.1	-0.01	0.15	-0.18	0.06	0.04	0	0.02	0	0.11	0.17	0.03	0.12	0.07	0.2	0.04	-0.08	0.03	0.08	0.08	0.04	0.07	0.08	0.04	0.04	0.12	0.15	0.14	0.11	0.07	0.06	0.09	0.05	-0.05	-0.01	0.14	0.09	0.05	0.07	0.13	0.03	0.09	0.1	0.1	0.09	0.08
ABHD17B	0	0.15	0.11	0.27	0	0.12	-0.06	0.22	0.18	0.03	0.03	-0.01	0.26	0.28	0.14	0.33	0.03	0.26	0.25	-0.01	0.09	0.26	0.3	0.26	0.1	0.17	0.18	0	0.17	0.23	0.15	0.28	0.22	0.29	0.25	0.21	-0.09	0	0.35	0.22	-0.05	0.1	0.38	0.19	0.19	0.02	0.27	-0.01	0.06
ABHD17C	-0.09	-0.06	-0.33	-0.13	-0.05	-0.12	0.1	-0.17	-0.13	-0.04	0.17	0.05	-0.19	-0.08	-0.1	-0.14	-0.05	-0.15	-0.23	0.31	-0.2	-0.14	-0.25	-0.06	-0.09	-0.19	-0.16	-0.12	-0.09	-0.18	-0.16	-0.19	-0.02	-0.13	-0.13	-0.06	0.04	-0.03	-0.14	-0.14	-0.01	-0.1	-0.2	-0.06	-0.07	0.01	-0.16	0.05	0
ABHD2	-0.09	-0.11	-0.23	-0.19	0	-0.17	0.18	-0.15	-0.07	-0.11	-0.08	-0.03	-0.21	-0.25	-0.15	-0.14	-0.03	-0.21	-0.13	0.11	-0.09	-0.18	-0.15	-0.08	-0.13	-0.05	-0.05	-0.13	-0.07	-0.16	-0.16	-0.2	-0.18	-0.12	-0.23	-0.04	0.1	-0.06	-0.2	-0.19	0.01	-0.12	-0.23	-0.13	-0.12	0.03	-0.13	-0.11	-0.12
ABHD3	-0.04	0.09	-0.06	0.08	0.01	0.1	-0.07	0.09	0.14	-0.02	0.19	0.01	0.09	0.11	0	0.16	0.04	0.16	-0.01	0.13	-0.01	0.08	0	0.1	0.04	-0.03	-0.08	0.03	0.08	0.1	0.13	0.05	0.08	0.11	0.17	0.08	-0.04	0.05	0.17	0.02	-0.05	0.09	0.13	0.11	0.14	0.09	0.13	0	0.1
ABHD4	0.06	-0.04	-0.14	-0.22	0.02	-0.14	0.17	-0.14	-0.1	-0.04	-0.01	-0.03	-0.21	-0.24	-0.05	-0.21	-0.14	-0.29	-0.12	-0.04	-0.02	-0.19	-0.19	-0.12	-0.08	-0.06	-0.08	-0.04	-0.1	-0.13	-0.11	-0.14	-0.06	-0.23	-0.13	-0.2	0.12	0.14	-0.35	-0.17	0.03	-0.07	-0.28	-0.08	-0.09	0.03	-0.24	0.16	-0.05
ABHD5	-0.06	-0.05	-0.05	-0.03	0.02	-0.11	0.02	-0.04	-0.03	0.02	-0.07	-0.04	-0.15	-0.15	-0.09	-0.06	0.13	-0.08	-0.05	-0.02	0.04	0.02	0	-0.11	-0.01	0.08	0.04	-0.07	0.01	-0.1	-0.05	-0.02	-0.28	-0.09	-0.06	-0.08	0.09	-0.06	-0.14	-0.01	-0.06	-0.06	-0.13	-0.05	-0.09	0.02	-0.02	0.02	-0.07
ABHD6	-0.05	0.03	-0.14	-0.03	-0.1	0	-0.16	-0.07	-0.06	-0.03	-0.15	-0.01	-0.08	0.05	-0.03	-0.05	-0.08	0.05	0.04	0.01	0.03	-0.11	-0.05	0	-0.05	-0.09	0.03	-0.03	0.09	-0.03	0.07	0.01	0.04	-0.06	0.02	0.04	-0.08	0.15	-0.05	0.01	0.01	-0.02	0	0.01	0	-0.07	0.03	0	-0.05
ABHD8	0.04	0.02	0.12	-0.06	0.08	-0.01	0.1	0.01	0.03	0.02	-0.1	0.01	-0.03	-0.12	-0.01	-0.03	-0.02	-0.07	0.03	-0.13	0.06	0	0	-0.03	-0.05	-0.02	0	0.04	0.01	-0.03	0	0.03	-0.04	-0.02	0.03	-0.07	0.05	0.01	-0.14	-0.05	0.02	-0.01	-0.06	0.06	-0.02	0.05	-0.04	-0.03	-0.11
ABI1	-0.06	0.04	0.09	0.06	-0.02	0.13	-0.05	0.1	0.07	0.03	0.14	-0.01	0.17	0.18	0.04	0.2	0.07	0.15	0.11	0.01	0.17	0.22	0.08	0.13	0.11	0.13	0	0.03	0.07	0.23	0.16	0.08	0.08	0.13	0.17	0.1	0.07	0.02	0.18	0.08	-0.04	0.08	0.17	0.06	0.14	0.1	0.11	-0.09	0.07
ABI2	0	0	0.05	0.03	0.05	0	0.08	0	-0.07	0	-0.23	0.04	0	-0.11	-0.01	-0.12	-0.02	-0.13	0	-0.12	0.06	-0.07	0.08	-0.02	-0.05	-0.03	0.04	-0.06	-0.05	-0.08	-0.08	0.02	0	-0.01	-0.03	-0.07	0.06	0.09	-0.16	0.02	0.05	-0.09	0.01	0.02	0	-0.09	-0.05	-0.05	0.01
ABI3	0.07	0.13	0.18	0.18	-0.06	0.21	-0.2	0.17	0.12	0.06	0.06	-0.04	0.21	0.23	0.07	0.23	0.03	0.24	0.13	-0.08	0	0.13	0.16	0.14	0.12	0.06	0.04	0.05	0.11	0.25	0.16	0.18	0.06	0.15	0.24	0.14	-0.03	0.01	0.2	0.22	0.07	0.15	0.26	0.07	0.18	0.07	0.19	0.09	0.09
ABI3BP	0.02	-0.08	0.03	-0.13	0.06	-0.1	-0.02	-0.07	-0.09	0.01	-0.1	0.03	-0.16	-0.22	0.02	-0.16	-0.04	-0.13	-0.01	-0.18	0.06	-0.11	-0.07	-0.13	-0.03	0.01	0.05	0.05	-0.12	-0.08	-0.07	-0.12	-0.22	-0.16	-0.13	-0.11	0	-0.08	-0.32	-0.06	0.04	-0.03	-0.22	-0.09	-0.12	-0.05	-0.1	-0.05	0.02
ABL1	0.06	0.04	0.07	0.02	-0.03	-0.01	-0.09	0.09	0.07	0.06	-0.17	-0.01	0.08	-0.02	0.01	-0.01	0.05	-0.02	0.2	-0.13	0.14	0.09	0.18	0.03	-0.02	0.09	0.16	0.03	0	0.03	0.01	0.09	-0.09	0.1	-0.03	0.01	-0.02	-0.04	-0.07	0.06	0.04	-0.05	0.04	0.01	-0.03	-0.02	0.03	-0.07	0.06
ABL2	0.05	-0.05	0.02	-0.15	-0.05	-0.1	-0.02	-0.08	-0.11	0.03	-0.23	-0.03	-0.18	-0.15	-0.06	-0.16	0	-0.21	-0.06	-0.23	0.07	-0.1	-0.12	-0.18	-0.08	-0.17	0	0.04	-0.08	-0.11	-0.09	-0.11	-0.23	-0.19	-0.17	-0.09	-0.08	0.06	-0.24	-0.05	0	-0.05	-0.18	-0.11	-0.14	-0.02	-0.09	-0.04	-0.05
ABLIM1	0.03	-0.04	-0.22	-0.13	0.08	-0.1	0.19	-0.06	-0.03	-0.01	0.22	0.01	-0.05	-0.14	-0.08	-0.14	-0.12	-0.13	-0.19	0.27	-0.17	-0.11	-0.21	0.02	-0.03	-0.09	-0.17	-0.11	-0.06	-0.14	-0.12	-0.13	-0.04	-0.07	-0.04	-0.09	0.02	0.01	-0.06	-0.13	0.03	-0.08	-0.11	-0.02	-0.02	-0.03	-0.15	0.08	-0.03
ABLIM2	0.12	0.06	-0.06	0.12	0.02	0.09	-0.06	0.1	0.1	-0.03	0.17	0.04	0.12	0.13	0.01	0.13	0.05	0.08	0	0.16	-0.13	0.09	0.05	0.11	-0.04	0.03	-0.03	-0.02	0	0.04	0.03	0.09	0.12	0.11	0.14	0.1	0.01	-0.09	0.22	0.09	-0.04	0.04	0.12	0.04	0.11	-0.04	0.21	0.08	0.05
ABLIM3	0.03	-0.17	-0.18	-0.36	-0.05	-0.21	0.1	-0.16	-0.19	-0.04	-0.12	0	-0.36	-0.42	-0.11	-0.32	-0.02	-0.32	-0.23	-0.06	-0.04	-0.3	-0.31	-0.28	-0.12	-0.26	-0.17	-0.02	-0.18	-0.26	-0.19	-0.28	-0.18	-0.32	-0.37	-0.26	0.07	-0.06	-0.47	-0.2	0.04	-0.15	-0.48	-0.23	-0.24	0.04	-0.29	-0.01	-0.11
ABO	0.06	0.03	-0.12	-0.08	0.01	-0.02	-0.12	-0.02	-0.02	-0.01	0.15	-0.04	-0.05	-0.03	-0.08	-0.09	0.01	-0.02	-0.14	0.09	-0.14	-0.04	-0.11	0	-0.02	-0.12	-0.15	-0.07	-0.03	-0.05	-0.06	-0.06	0	-0.06	-0.03	-0.08	0.04	0.03	-0.02	-0.04	-0.02	-0.06	-0.09	-0.11	-0.02	0.05	-0.06	0.07	0.02
ABP1	-0.05	-0.04	-0.09	-0.03	-0.05	0.01	-0.02	-0.06	0.06	-0.01	0.18	-0.02	0.02	-0.05	-0.04	0.03	0.06	-0.05	-0.07	0.14	-0.07	-0.01	-0.1	0.01	-0.04	-0.08	-0.06	-0.07	-0.06	-0.02	-0.03	-0.05	0.01	-0.01	0.01	-0.01	0	-0.03	0.04	-0.07	0.03	-0.03	-0.03	-0.06	0.05	0.02	-0.03	-0.01	0.06
ABR	-0.05	-0.02	-0.03	-0.16	-0.14	0.02	0.07	-0.09	-0.04	-0.05	-0.05	-0.02	-0.12	-0.07	-0.07	-0.13	-0.07	-0.09	0	-0.01	0.08	-0.06	-0.13	0	-0.07	-0.14	-0.05	0	-0.06	-0.14	-0.09	-0.13	0.05	-0.01	-0.17	-0.03	0	0.04	-0.16	-0.07	0.09	-0.08	-0.14	-0.05	-0.04	0.06	-0.02	-0.06	-0.01
ABRA	0.03	0.07	0.12	0.07	-0.02	0.11	-0.07	0.05	0.09	0.04	0.06	0.01	0.1	-0.02	0.02	0.09	-0.01	0.05	0.09	-0.04	0	0.05	0.06	0.09	0.12	0.04	0.05	-0.01	0.08	0.08	0.06	0.08	-0.08	0.05	0.1	0.02	0.13	0.03	0.1	0.1	0.01	0.03	0.09	0.02	0.08	0.04	0.06	0.02	0
ABRACL	-0.02	0.04	0.01	0.15	-0.02	0.14	-0.07	0.1	0.16	0.02	0.18	0.01	0.16	0.17	0.06	0.17	0.11	0.13	0.1	0.16	0.01	0.03	0.07	0.14	0.04	-0.05	-0.09	0	0.1	0.12	0.08	0.07	0.17	0.19	0.15	0.1	0.09	-0.07	0.14	0.06	0.01	0.02	0.17	0.05	0.09	0.18	0.09	0.03	0.09
ABT1	0.13	0.14	0.15	0.25	-0.01	0.18	-0.18	0.12	0.13	0.03	0.06	-0.02	0.24	0.36	0.1	0.31	0.09	0.36	0.18	-0.02	0.08	0.2	0.23	0.2	0.16	0.19	0.11	0.02	0.23	0.26	0.21	0.19	0.17	0.24	0.31	0.2	-0.08	0.02	0.36	0.16	-0.03	0.09	0.37	0.09	0.18	0.15	0.23	0.07	0.05
ABTB1	0.07	0.01	-0.03	-0.04	-0.05	0.01	-0.04	-0.03	0.02	-0.01	0.04	-0.01	0	-0.08	0.01	0.05	0.08	-0.05	0	0.01	-0.06	-0.01	-0.07	0.03	-0.04	-0.09	0	0.01	0	0.07	-0.02	-0.04	0.03	0.01	-0.03	-0.03	0.01	0.01	-0.06	0.04	0	-0.02	-0.03	-0.07	-0.01	0.14	0.05	0	0.02
ABTB2	-0.02	-0.08	-0.09	-0.21	-0.09	-0.05	0.03	-0.15	-0.13	-0.07	-0.04	-0.02	-0.19	-0.16	-0.08	-0.22	-0.07	-0.25	-0.15	0.06	-0.09	-0.21	-0.27	-0.17	-0.08	-0.28	-0.19	0.01	-0.07	-0.18	-0.13	-0.2	-0.1	-0.21	-0.22	-0.13	0.11	-0.09	-0.27	-0.19	0.11	-0.08	-0.32	-0.1	-0.1	0.05	-0.2	0	-0.07
ACAA1	0	-0.05	-0.1	-0.13	-0.09	0	-0.03	-0.11	-0.12	-0.08	0	-0.03	-0.15	-0.03	-0.06	-0.04	-0.04	-0.03	-0.09	0.03	-0.04	-0.12	-0.13	-0.03	0.01	-0.12	-0.06	0.02	0.02	-0.07	0	-0.11	0.02	-0.06	-0.07	-0.04	0.07	-0.12	-0.08	-0.05	0.01	-0.04	-0.15	-0.11	-0.05	0.05	-0.03	-0.04	-0.11
ACAA2	0.02	0.13	0.19	0.14	-0.01	0.14	-0.05	0.16	0.17	-0.01	-0.05	0.04	0.2	0.27	0.08	0.23	0.04	0.22	0.21	0.02	0	0.23	0.24	0.17	0.08	0.24	0.19	0.07	0.1	0.14	0.22	0.21	0.06	0.18	0.23	0.19	-0.03	0	0.35	0.15	0.03	0.04	0.26	0.15	0.18	-0.1	0.28	0.02	-0.03
ACACA	-0.1	0	-0.11	0.01	0.01	-0.01	-0.09	0.03	-0.08	0.07	0.15	0.07	0.03	0.04	0.01	-0.01	-0.07	-0.01	-0.07	0.11	-0.08	-0.01	0	0.07	0.02	0	-0.08	-0.06	-0.02	-0.07	-0.06	-0.03	0.16	0.04	0	-0.03	-0.02	-0.11	0.04	-0.13	0.06	0	0.02	0.08	-0.01	-0.07	-0.1	-0.1	0.01
ACACB	0.01	0.04	0.03	0.06	-0.07	0.06	-0.06	0.08	0.03	-0.01	-0.07	0	0.02	0.12	0.05	0.09	0.01	0.02	0	-0.03	-0.06	0.05	0.09	0.03	0.03	0.03	0.06	0	0.15	-0.02	0.06	0.05	-0.07	0.06	0.08	0.1	-0.04	0	0.17	0.02	-0.02	0.09	0.14	0.07	0.09	0.02	0.1	-0.02	-0.04
ACAD10	-0.13	0.03	0.04	0.11	-0.09	0.07	-0.11	0.07	0.03	-0.01	0.03	-0.02	0.18	0.16	0.06	0.16	0	0.16	0.1	-0.08	-0.03	0.12	0.12	0.14	0.09	0.11	0.02	-0.02	0.1	0.07	0.09	0.1	0.16	0.18	0.09	0.11	-0.02	0.02	0.22	0.05	-0.01	0.08	0.19	0.05	0.08	-0.04	0.11	-0.09	-0.02
ACAD8	-0.02	0.09	0.12	0.14	-0.03	0.14	-0.07	0.08	0.11	-0.01	0.05	0.04	0.19	0.12	0.08	0.22	0.05	0.18	0.11	0.07	0.1	0.16	0.17	0.2	0.11	0.13	0.09	-0.03	0.11	0.1	0.12	0.16	0.15	0.19	0.2	0.16	0.07	0.11	0.24	0.06	-0.02	0.06	0.18	0.11	0.2	0.04	0.17	0.01	0.03
ACAD9	-0.09	-0.05	-0.1	-0.04	-0.06	-0.08	-0.04	-0.12	-0.12	-0.05	-0.01	-0.04	-0.09	-0.09	-0.05	-0.07	-0.07	-0.03	-0.08	0	-0.1	-0.13	-0.12	-0.05	-0.02	-0.14	-0.13	0.05	-0.01	-0.09	-0.05	-0.11	0.07	-0.08	-0.1	-0.08	-0.04	-0.13	-0.07	-0.06	0.05	0.02	-0.08	-0.1	-0.11	-0.03	-0.06	-0.06	-0.09
ACADL	0.01	-0.02	0.02	0.08	0.07	0.04	0.05	0.04	0.05	0.02	0.04	0	0	0.02	-0.02	0.02	-0.06	-0.01	-0.06	0.04	-0.04	0	-0.04	-0.03	0.06	0.03	-0.03	0	0.04	0.02	-0.01	-0.02	-0.23	-0.02	0.02	-0.05	-0.06	-0.02	0.11	0.09	0.02	0.07	0.05	-0.03	-0.02	-0.07	0	0.05	-0.02
ACADM	0	0.14	0.18	0.29	0.01	0.23	-0.01	0.24	0.24	0.05	-0.06	-0.03	0.24	0.31	0.12	0.33	0.08	0.28	0.24	-0.03	0.07	0.21	0.28	0.15	0.13	0.17	0.11	0.06	0.18	0.25	0.17	0.3	-0.04	0.22	0.31	0.2	0.02	0.1	0.4	0.24	0.01	0.21	0.39	0.23	0.21	0.02	0.27	-0.05	0
ACADS	-0.07	-0.06	-0.13	-0.02	-0.05	0.01	0.12	-0.09	-0.07	-0.03	0.02	-0.03	-0.08	0.06	-0.13	-0.01	-0.1	-0.01	-0.12	0.06	-0.11	-0.06	-0.11	0.04	0.01	-0.12	-0.12	-0.16	0.07	0	-0.01	-0.1	0.14	-0.08	0.02	-0.03	-0.04	0.05	0.03	-0.07	0.04	0	-0.02	-0.07	0.05	0.03	-0.06	-0.02	-0.04
ACADSB	-0.14	0.05	0.02	0.06	-0.01	0.1	-0.03	0.18	0.11	0.07	-0.06	-0.01	0.05	0.15	0.03	0.16	0.01	0.18	0.1	-0.05	0.07	0.23	0.11	0.12	0.03	0.14	0.08	0.06	0.09	0.05	0.13	0.12	0.14	0.07	0.13	0.12	-0.02	0.04	0.26	0.06	0	0.12	0.17	0.13	0.07	-0.09	0.14	-0.04	-0.06
ACADVL	-0.06	-0.11	-0.13	-0.16	0.02	-0.1	0.25	-0.22	-0.13	-0.11	-0.04	0.01	-0.15	-0.22	-0.09	-0.2	-0.12	-0.19	-0.1	0.01	-0.02	-0.2	-0.18	-0.06	-0.09	-0.13	-0.15	-0.04	-0.07	-0.12	-0.12	-0.18	0.09	-0.15	-0.12	-0.17	0.07	-0.03	-0.28	-0.18	0	-0.1	-0.23	-0.11	-0.11	0.09	-0.23	-0.03	-0.02
ACAN	-0.03	0.01	0.02	-0.03	-0.1	0.04	-0.04	-0.03	-0.01	-0.01	-0.02	-0.01	-0.04	-0.05	-0.01	0.02	0.08	0	0	-0.12	-0.01	-0.05	0	-0.04	0.05	-0.02	0.03	0.06	-0.05	0.01	0.03	-0.01	-0.03	-0.03	0.01	0	0.03	0.09	-0.06	0.06	0.01	0.04	0.02	-0.05	0	0.05	0.05	0.04	-0.02
ACAP1	0.09	0.12	0.17	0.3	-0.07	0.21	-0.19	0.15	0.14	0	0.15	0.01	0.25	0.33	0.14	0.32	0.07	0.32	0.18	-0.08	0.06	0.2	0.18	0.22	0.19	0.11	0.05	0.07	0.19	0.31	0.24	0.22	0.01	0.22	0.27	0.15	-0.06	0.04	0.34	0.2	0	0.17	0.33	0.07	0.17	0.13	0.24	0.07	0.11
ACAP2	-0.21	0.05	-0.05	0.11	0.06	0.06	0	0.11	0.05	-0.04	0.05	0	0.08	0.11	0.05	0.13	0.05	0.04	0.03	-0.07	0.05	0.03	0.09	0.07	0.07	0.01	-0.01	-0.02	0.05	0.13	0.01	0.1	-0.22	0.09	0.1	0.09	0.07	-0.02	0.07	0.02	-0.04	0.13	0.15	0.08	0.07	0	0.09	-0.18	0.04
ACAP3	0.14	0.06	-0.03	0.07	-0.01	0.05	-0.04	0.06	0.07	0.05	-0.05	0.05	0.1	0.1	0.08	0.18	-0.05	0.14	0.14	0.03	-0.07	0.13	0.14	0.06	0.01	0.05	0.18	0.09	-0.01	0.08	0.12	0.03	0.15	0.16	0.05	0.09	-0.06	-0.03	0.13	0.1	-0.02	0.07	0.11	0.04	0.1	-0.07	0.22	-0.07	-0.09
ACAT1	-0.06	0.04	0.1	0.12	-0.09	0.13	-0.12	0.13	0.09	-0.01	-0.16	-0.01	0.09	0.18	0.05	0.13	-0.01	0.17	0.16	-0.11	0.1	0.09	0.15	0.12	0.1	0.03	0.07	0.01	0.16	0.1	0.2	0.18	0.2	0.05	0.17	0.1	0.01	-0.02	0.2	0.07	-0.01	0.13	0.23	0.15	0.07	-0.04	0.11	-0.01	-0.07
ACAT2	0.03	0.14	0.08	0.14	-0.03	0.13	-0.17	0.12	0.15	0.04	0.02	0.04	0.13	0.16	0.06	0.14	0.02	0.24	0.13	0.02	-0.07	0.06	0.2	0.09	0.04	0.21	0.12	0.04	0.13	0.17	0.12	0.16	0.21	0.16	0.18	0.12	-0.03	-0.07	0.17	0.1	0.04	0.07	0.21	0.13	0.12	-0.02	0.19	-0.07	-0.03
ACBD3	-0.11	-0.09	-0.12	-0.16	0.01	-0.12	0.12	-0.15	-0.07	-0.04	-0.01	-0.01	-0.19	-0.16	-0.07	-0.12	-0.03	-0.21	-0.12	0.04	-0.04	-0.14	-0.15	-0.1	-0.05	-0.15	-0.08	-0.04	-0.1	-0.12	-0.08	-0.07	-0.12	-0.18	-0.11	-0.08	-0.01	0.01	-0.19	-0.07	-0.06	-0.07	-0.15	-0.04	-0.16	0.01	-0.12	-0.05	-0.04
ACBD4	-0.09	-0.01	0.03	0.02	-0.08	0.07	-0.1	0.01	-0.03	-0.05	0.07	0.01	0.03	0.01	-0.03	0.03	-0.04	0.02	-0.07	0.03	-0.01	0.02	-0.09	0.11	0.12	-0.06	-0.14	-0.09	0.03	0.03	0.03	0.01	0.07	-0.02	0.07	0	0.03	0.06	0.05	-0.03	0.03	0.01	0.02	0.01	0.06	0.02	0	0.02	-0.02
ACBD5	-0.12	-0.07	-0.13	-0.14	0.01	-0.09	0.16	-0.1	-0.07	0.01	-0.05	-0.01	-0.08	-0.15	-0.11	-0.15	0.07	-0.22	-0.07	0.08	-0.02	-0.03	-0.12	-0.03	-0.01	-0.07	-0.13	-0.08	-0.05	-0.13	-0.03	-0.08	-0.09	-0.11	-0.09	-0.04	0.12	-0.05	-0.11	-0.09	0.03	-0.08	-0.09	-0.01	-0.07	0.03	-0.11	-0.08	-0.07
ACBD6	0.06	0.12	0.13	0.27	-0.05	0.15	-0.15	0.15	0.07	0.05	-0.02	-0.01	0.2	0.21	0.11	0.22	0.03	0.2	0.14	-0.01	0.05	0.15	0.19	0.16	0.09	0.11	0.08	-0.01	0.09	0.17	0.15	0.18	0.07	0.14	0.24	0.11	-0.07	-0.05	0.26	0.14	-0.02	0.11	0.3	0.14	0.07	-0.07	0.12	0.02	0.09
ACCS	-0.06	-0.05	-0.1	-0.13	-0.03	-0.05	0.09	-0.07	-0.05	-0.03	0.02	0.05	-0.12	-0.08	-0.04	-0.08	-0.06	-0.07	-0.11	-0.08	0.06	-0.08	-0.13	-0.09	0	-0.09	-0.08	-0.09	-0.06	-0.08	-0.08	-0.12	0.1	-0.08	-0.09	-0.08	-0.01	-0.03	-0.11	-0.16	0.06	0.01	-0.14	-0.09	-0.06	0.01	-0.06	-0.03	-0.1
ACD	0.04	0	0.01	0.16	-0.02	0.09	-0.09	0	-0.04	0.02	-0.04	0.03	0.08	0.07	0.04	-0.01	-0.03	0.17	0	-0.15	0.05	-0.05	0.02	0.06	0.02	-0.1	-0.02	0	0.05	0.11	0.04	0	0.08	0.05	0.04	-0.01	-0.06	-0.02	0.02	0.06	0.05	-0.02	0.11	0.02	0.01	-0.04	0.03	0.05	0.03
ACE	0.16	0.01	-0.01	-0.02	0	0.06	-0.06	-0.03	-0.01	-0.03	0.06	0.07	-0.01	0	-0.03	0.02	-0.01	0.08	-0.08	0.09	-0.11	-0.03	0	0.02	0.05	-0.02	-0.07	-0.02	-0.07	-0.01	0.04	-0.01	0.01	0.02	-0.04	-0.03	-0.01	0.08	0.06	0.1	0.1	-0.01	-0.01	-0.05	0.03	-0.02	0.08	0.1	-0.06
ACE2	-0.06	-0.05	-0.07	0	0.04	0.01	0.13	-0.01	0.05	0	0.29	0.05	0.05	0.1	-0.01	0.02	-0.05	0.07	-0.1	0.16	-0.03	-0.02	-0.07	0.02	0.02	-0.03	-0.06	-0.02	0.01	0.04	0	0.02	0	0.04	0.07	0.02	0.06	-0.05	0.08	-0.06	-0.02	0.03	-0.01	-0.02	0	0.06	0.02	0.03	0.07
ACER1	0.04	0.08	0.11	0.17	-0.05	0.12	-0.12	0.1	0.04	0.01	-0.02	-0.06	0.19	0.18	0.07	0.19	-0.01	0.17	0.13	-0.04	0.01	0.16	0.18	0.17	0.1	0.05	-0.01	0.02	0.11	0.15	0.14	0.17	-0.06	0.16	0.17	0.09	0.01	0.01	0.25	0.15	-0.09	0.13	0.23	0.12	0.12	-0.04	0.12	-0.04	0.03
ACER3	-0.13	-0.12	-0.21	-0.06	0.01	-0.09	0.07	-0.08	-0.1	0.01	0.11	0.03	-0.15	-0.11	-0.06	-0.2	0.02	-0.1	-0.15	0.07	0.06	-0.17	-0.13	-0.13	-0.05	-0.15	-0.13	-0.06	0.01	-0.13	-0.08	-0.09	-0.08	-0.16	-0.15	-0.12	0.08	-0.01	-0.22	-0.16	0.02	-0.13	-0.16	-0.03	-0.12	0.05	-0.22	-0.1	0.04
ACHE	0.03	0.07	0.08	-0.01	0.03	0.08	-0.08	0.05	0.04	0.03	0.1	0.05	0.08	0.04	-0.01	0.08	0.01	0.1	0.03	-0.01	0.04	0.06	0.01	0.02	0.06	0	-0.05	0.05	0.06	0.06	0.09	0.04	0	0.09	0	0.02	0	-0.04	0.07	0.06	0.05	0.06	0.04	0.01	0.05	0.05	0.01	0.07	0.03
ACIN1	-0.02	0.1	0.13	0.24	-0.03	0.15	-0.1	0.16	0.11	0.04	0.05	0.04	0.27	0.23	0.18	0.22	-0.03	0.22	0.14	0.03	0.11	0.24	0.24	0.25	0.1	0.15	0.1	0.05	0.16	0.24	0.12	0.15	0.23	0.3	0.22	0.13	-0.03	0.03	0.25	0.11	0.03	0.14	0.25	0.14	0.12	0.03	0.14	0	0.1
ACLY	-0.03	0.08	0.16	0.13	-0.08	0.1	-0.22	0.17	0.08	0.08	-0.08	0	0.15	0.06	0.11	0.19	-0.02	0.06	0.15	-0.01	0.03	0.15	0.17	0.14	0.05	0.13	0.12	0.03	0.06	0.09	0.07	0.08	0.14	0.14	0.11	0.11	0	-0.01	0.16	0.07	0.01	0	0.16	0.11	0.1	-0.08	0.13	-0.12	0.01
ACMSD	-0.04	0.02	0.06	-0.05	-0.03	0.03	-0.09	0	0.07	0	0.01	0.03	-0.01	-0.03	0.01	-0.01	0.03	-0.03	-0.02	-0.01	-0.09	-0.01	-0.08	0.02	0.03	-0.05	-0.08	0.04	-0.02	-0.04	0	-0.02	-0.01	-0.05	-0.03	-0.07	0	-0.01	0.06	-0.03	0.05	-0.02	-0.04	-0.04	-0.05	-0.01	-0.02	-0.06	-0.03
ACN9	0.06	0.07	-0.03	0.19	-0.01	0.1	0.03	0.16	0.11	0.05	0	0.01	0.2	0.27	0.05	0.19	0.12	0.18	0.12	0.09	0.01	0.14	0.17	0.12	0.1	0.08	0.04	-0.04	0.1	0.11	0.11	0.1	0.03	0.17	0.18	0.09	-0.05	0.11	0.24	0.12	0.02	0.14	0.31	0.15	0.12	0.01	0.11	0	-0.01
ACO1	-0.01	-0.14	-0.01	-0.21	0	-0.15	0.05	-0.14	-0.13	0	-0.18	0.01	-0.21	-0.26	-0.09	-0.23	0	-0.25	-0.08	-0.09	0.12	-0.19	-0.11	-0.14	-0.05	-0.09	-0.02	-0.08	-0.01	-0.16	-0.12	-0.13	-0.06	-0.22	-0.18	-0.17	0.13	-0.04	-0.37	-0.21	0.04	-0.18	-0.24	-0.1	-0.17	0.01	-0.2	-0.04	-0.05
ACO2	0.03	0.09	-0.04	0.09	-0.11	0.08	-0.19	0.08	0.06	-0.04	0.06	-0.03	0.06	0.24	0.11	0.15	-0.05	0.15	0.14	0.04	-0.05	0.12	0.08	0.14	0.02	0.07	-0.03	0.07	0.12	0.12	0.13	0.15	0.07	0.11	0.12	0.14	0.08	0.11	0.22	0.03	0.04	0.14	0.2	0.11	0.15	-0.04	0.13	0.08	-0.05
ACOT11	0	-0.02	-0.15	0.01	-0.01	-0.06	0.05	-0.12	-0.04	0.02	0.25	0.05	0.02	0.02	-0.06	-0.04	-0.02	0	-0.18	0.3	-0.12	-0.09	-0.09	0.02	-0.07	-0.09	-0.15	-0.14	0	-0.04	-0.1	-0.05	0.03	0.04	-0.02	-0.04	0.04	-0.04	0.03	-0.09	0.01	-0.07	-0.03	-0.05	0	0.01	-0.09	0.07	0.02
ACOT12	0.09	0.1	0.1	0.09	0.06	0.08	0.05	0.06	0.01	-0.01	-0.17	-0.04	0.05	0.09	0.05	0.12	0.03	0.1	0.1	-0.13	0	0.12	0.14	0.03	0.04	0.07	0.11	0.04	0.02	0.09	0.07	0.15	-0.07	0.04	0.09	0.08	0.03	-0.01	0.05	0.08	-0.03	0.07	0.12	0.06	0.02	0.06	0.14	0	0.04
ACOT13	0.09	0.06	-0.01	0.06	0.01	0.03	0.06	0.02	0.04	-0.03	0	0	0.07	0.15	0.06	0.1	0.08	0.04	0.11	-0.04	0	0.02	0.1	0.04	0.1	0.11	0.06	0.03	0.12	0.05	0.13	0.1	-0.03	0.02	0.19	0.02	0.1	0	0.02	-0.03	-0.02	0.09	0.16	0.07	0.06	0.13	-0.01	-0.01	-0.04
ACOT4	-0.01	-0.02	-0.14	-0.07	0.05	-0.06	0.07	-0.09	-0.11	0.02	0.21	0.06	-0.1	-0.07	0.01	-0.09	0.06	-0.12	-0.21	0.24	-0.13	-0.05	-0.15	-0.04	-0.02	-0.08	-0.19	-0.03	-0.06	-0.11	-0.08	-0.1	0.03	-0.08	-0.08	-0.09	0.09	-0.12	-0.05	-0.1	-0.01	-0.05	-0.19	-0.07	-0.04	0.08	-0.09	0.07	-0.03
ACOT6	-0.08	0.08	0.09	0.05	0.03	0.12	-0.12	0.11	0	0	0.08	0.09	0.06	0.12	0.04	0.08	-0.01	0.11	0	-0.01	0.01	0.07	0.04	0.01	0.1	0.05	0	0.07	-0.01	0.07	0.05	0.13	-0.08	0.03	0.1	-0.01	-0.02	-0.07	0.06	0	-0.05	0.06	0.05	0.04	0.07	0.03	0.06	-0.15	0.04
ACOT7	-0.04	0.02	-0.02	-0.02	-0.07	0.02	0.01	-0.06	-0.04	0	-0.18	-0.02	-0.05	0.03	0	-0.05	-0.07	0.06	0.01	-0.16	0.11	-0.04	0	-0.04	-0.14	-0.06	0.02	-0.01	0.05	0.01	-0.05	-0.01	0.1	-0.05	0.01	0.02	-0.01	0.01	-0.07	0.03	0.06	-0.04	0.02	0.04	-0.01	-0.05	0.02	-0.09	-0.03
ACOT8	0.02	-0.04	0.08	-0.1	-0.07	0.03	-0.08	-0.02	-0.02	-0.06	-0.09	-0.02	-0.03	0.02	0.02	0.05	-0.12	0.05	0.03	-0.12	0.02	-0.03	-0.04	-0.02	-0.01	-0.04	-0.01	0.04	0	0.01	0	-0.02	0.05	-0.06	0.02	-0.02	-0.04	-0.1	0.04	-0.01	-0.07	0.01	-0.03	-0.04	0	-0.03	0.04	-0.05	-0.14
ACOT9	-0.09	-0.13	-0.1	-0.22	-0.02	-0.2	0.09	-0.25	-0.24	-0.06	-0.2	-0.05	-0.28	-0.28	-0.09	-0.38	-0.1	-0.27	-0.22	-0.18	0.06	-0.32	-0.27	-0.23	-0.12	-0.23	-0.17	-0.01	-0.08	-0.23	-0.15	-0.23	-0.14	-0.34	-0.23	-0.28	0	0.05	-0.47	-0.17	0.03	-0.17	-0.3	-0.12	-0.22	-0.01	-0.35	-0.04	-0.02
ACOX1	-0.05	-0.04	-0.17	-0.2	-0.01	-0.08	0.17	-0.13	-0.15	0.03	0.1	0.03	-0.12	-0.2	-0.14	-0.12	-0.06	-0.12	-0.16	0.14	-0.05	-0.05	-0.12	-0.04	-0.11	0.01	-0.08	-0.09	-0.14	-0.19	-0.09	-0.14	-0.1	-0.04	-0.17	-0.06	0.1	-0.05	-0.09	-0.14	0	-0.11	-0.21	-0.07	-0.02	-0.03	-0.11	0.04	-0.09
ACOX2	0	-0.05	-0.05	-0.11	-0.01	-0.03	0.25	-0.12	-0.14	-0.03	-0.18	-0.05	-0.18	-0.12	-0.06	-0.18	-0.01	-0.11	-0.08	0.03	0.15	-0.11	-0.07	-0.13	-0.03	-0.05	0	-0.06	0.03	-0.17	-0.08	-0.09	-0.02	-0.15	-0.13	-0.07	0.1	0.01	-0.2	-0.08	0.05	-0.02	-0.16	-0.09	-0.15	0.03	-0.16	-0.07	-0.1
ACOX3	-0.01	0.06	0.1	-0.02	-0.04	0.08	-0.19	0.03	-0.02	0.01	-0.15	0.04	0	-0.02	0.02	0.02	0.06	0.09	0.14	-0.22	0.21	0.08	0.08	0.01	0.07	0.09	0.15	0.13	0.02	0.04	0.06	0.03	0.06	0.04	0.01	0.05	0.02	-0.06	-0.02	0.04	0.04	0.02	0.02	-0.02	0.07	0.05	0.04	0.04	-0.02
ACOXL	-0.02	0.04	-0.01	0.08	0.02	0.09	0.02	0.04	0.09	-0.06	0.14	0.02	0.04	0.12	0.03	0.14	0.01	0.12	-0.06	0.14	-0.12	0.05	-0.04	0.11	0.04	-0.01	-0.14	-0.02	0.03	0.03	0.01	0.03	0.15	0.06	0.05	0.08	-0.06	-0.01	0.19	0.03	-0.02	0.02	0.05	0.05	0.02	0.09	0.08	0.08	0
ACP1	0	0.05	0.08	0.19	-0.01	0.12	0.04	0.04	0.08	-0.02	0.1	-0.02	0.18	0.24	0.01	0.17	-0.06	0.19	0.04	0.11	-0.07	0.08	0.1	0.14	0.04	0.11	0.05	-0.06	0.11	0.11	0.09	0.07	0.09	0.13	0.15	0.1	-0.02	0.03	0.3	0.12	0	0.08	0.27	0.1	0.11	-0.14	0.13	0.08	0.04
ACP2	0.02	-0.07	-0.15	-0.2	0.02	-0.14	0.1	-0.22	-0.22	-0.07	-0.08	0.06	-0.24	-0.23	-0.08	-0.24	-0.1	-0.18	-0.16	0.04	-0.05	-0.22	-0.17	-0.17	-0.07	-0.14	-0.08	-0.03	-0.06	-0.26	-0.1	-0.18	-0.2	-0.21	-0.16	-0.19	0.12	-0.02	-0.33	-0.13	0.02	-0.16	-0.29	-0.09	-0.09	0.06	-0.17	0.07	-0.1
ACP5	-0.13	-0.02	-0.09	0.01	-0.05	0.01	0	-0.01	-0.03	-0.13	0.01	-0.09	-0.05	0.14	0.02	0.1	0.09	0.05	-0.01	0.01	-0.1	-0.07	-0.06	-0.05	-0.02	-0.1	0.01	0.1	-0.01	0.04	0.04	-0.02	0.09	-0.01	-0.01	0.02	0	-0.01	0.03	0.01	-0.07	0.06	-0.01	-0.04	-0.06	0.09	0.07	-0.07	0.04
ACP6	0.04	-0.06	-0.15	-0.12	-0.06	-0.04	0.13	-0.22	-0.18	-0.12	0.08	-0.05	-0.13	-0.06	-0.1	-0.14	-0.05	-0.16	-0.25	0.21	-0.1	-0.19	-0.26	-0.06	-0.04	-0.15	-0.16	-0.12	0	-0.13	-0.1	-0.18	-0.06	-0.12	-0.07	-0.11	0.03	0.02	-0.16	-0.17	0.05	-0.1	-0.14	-0.05	-0.06	0.05	-0.2	0.03	-0.04
ACPL2	-0.04	-0.02	-0.08	-0.06	0.06	-0.05	0.07	-0.07	0.05	0.05	0.03	0.05	-0.05	-0.07	-0.11	-0.03	0.07	-0.06	-0.07	0.23	-0.1	0	-0.02	-0.04	-0.1	0.03	-0.02	-0.11	0	-0.11	-0.15	-0.04	-0.24	0.01	-0.12	0.02	-0.04	-0.04	-0.01	-0.02	-0.02	-0.15	-0.03	-0.03	-0.03	-0.01	-0.01	-0.13	-0.02
ACPP	-0.15	0	-0.01	0.09	-0.08	0.06	-0.15	0.06	0.03	0.08	0.2	-0.01	0.09	0.15	0.02	0.14	0.11	0.13	0	0.19	-0.08	0.1	0.01	0.09	0.04	0.07	-0.06	0.02	0.05	0.11	0.05	0.09	0.25	0.15	0.11	0.09	0.02	-0.07	0.15	0.05	0.02	0.13	0.12	0.04	-0.01	0.11	0.09	-0.1	0.07
ACPT	0.1	0.11	0.07	0.14	0.04	0.14	-0.06	0.12	0.14	0.08	0.04	-0.03	0.14	0.12	0.04	0.16	0.03	0.18	0.1	-0.06	0	0.21	0.17	0.1	0.09	0.13	0.05	0.04	0.12	0.1	0.1	0.14	0.23	0.16	0.17	0.07	0.04	-0.09	0.28	0.14	-0.02	0.15	0.19	0.07	0.12	0.02	0.15	-0.04	0.1
ACRBP	0.1	0.15	0.17	0.23	-0.02	0.2	-0.17	0.2	0.18	0.05	0.22	0.05	0.3	0.24	0.11	0.31	0.06	0.26	0.14	0.03	0.11	0.24	0.19	0.22	0.1	0.18	0.04	0.06	0.14	0.24	0.17	0.17	0	0.29	0.21	0.14	-0.03	0.05	0.33	0.19	-0.04	0.17	0.31	0.11	0.18	0.06	0.21	0	0.1
ACRC	0.07	0.09	0.17	0.13	0.01	0.12	-0.12	0.08	0.14	0.03	-0.03	-0.03	0.14	0.16	0.05	0.18	0.01	0.17	0.19	-0.06	0.09	0.09	0.14	0.08	0.11	0.09	0.12	0.05	0.07	0.16	0.13	0.17	0.19	0.12	0.11	0.1	-0.04	0.11	0.16	0.11	-0.02	0.07	0.18	0.05	0.07	0.08	0.21	-0.01	0.07
ACRV1	0.06	0.06	0.04	0.13	-0.02	0.09	-0.02	0.17	0.1	0.03	0.03	-0.02	0.14	0.24	0.06	0.15	0.06	0.21	0.05	0.02	-0.01	0.1	0.12	0.09	0.06	0.07	0.03	0	0.07	0.12	0.14	0.15	-0.03	0.14	0.15	0.1	-0.03	0.02	0.25	0.09	-0.03	0.13	0.16	0.06	0.12	0.05	0.16	-0.06	0.03
ACSBG1	0.08	0.02	0.07	0.06	-0.03	0.07	-0.03	0.07	0	-0.01	-0.02	-0.06	0.07	0.12	-0.01	0.14	0.02	0.04	0.04	-0.03	0.02	0.06	0.06	0.06	0.07	0.02	0.03	0.02	0.07	0.09	0.02	0.04	-0.02	0.09	0.06	0.03	0.03	0.07	0.12	0.11	-0.04	0.16	0.11	0.01	0.03	0.05	0.11	0.02	0.02
ACSBG2	0.04	0.13	0.16	0.22	0.01	0.19	-0.15	0.19	0.12	-0.01	0.03	0	0.21	0.23	0.14	0.23	0.01	0.26	0.16	-0.12	0.07	0.19	0.19	0.14	0.12	0.09	0.09	0.07	0.15	0.21	0.21	0.23	-0.09	0.15	0.21	0.13	-0.05	0.03	0.26	0.17	-0.02	0.18	0.31	0.13	0.16	-0.03	0.15	0.08	0.08
ACSF2	-0.06	-0.07	-0.06	-0.16	-0.03	-0.03	0.01	-0.14	-0.12	-0.02	0.2	0.03	-0.08	-0.11	-0.05	-0.02	-0.07	-0.11	-0.16	0.04	0.05	-0.08	-0.19	-0.02	-0.06	-0.14	-0.14	0.03	-0.04	0	-0.05	-0.1	-0.03	-0.06	-0.08	-0.05	0.11	-0.07	-0.06	-0.15	-0.01	-0.03	-0.19	-0.1	-0.07	0.07	-0.15	-0.07	0
ACSF3	-0.03	0.11	0.14	0.21	-0.07	0.22	-0.2	0.16	0.08	0.02	0.09	0.03	0.2	0.23	0.1	0.25	-0.04	0.22	0.13	-0.14	0.1	0.21	0.16	0.19	0.11	0.11	0.06	0.03	0.18	0.23	0.14	0.1	0.18	0.22	0.2	0.14	-0.05	0.07	0.25	0.11	0.01	0.1	0.26	0.11	0.18	-0.03	0.15	0.06	0.02
ACSL1	-0.12	0.03	-0.1	-0.05	-0.07	-0.05	-0.06	-0.03	0.06	-0.04	0.07	0.04	-0.07	-0.08	0.05	-0.04	-0.07	-0.12	-0.07	0.13	-0.11	-0.07	-0.07	-0.03	0.02	-0.05	-0.06	-0.01	0.02	-0.08	-0.07	-0.02	-0.04	-0.07	-0.03	0.06	0.02	-0.08	-0.08	-0.05	0	0	-0.05	0.01	-0.02	-0.08	-0.04	-0.01	-0.06
ACSL3	-0.17	-0.12	-0.32	-0.18	0.03	-0.16	0.23	-0.18	-0.21	-0.09	-0.02	-0.08	-0.3	-0.08	-0.11	-0.22	-0.08	-0.18	-0.27	0.07	-0.09	-0.26	-0.22	-0.2	-0.13	-0.23	-0.1	-0.13	-0.07	-0.25	-0.13	-0.2	-0.01	-0.23	-0.19	-0.11	0.04	0.03	-0.24	-0.16	0.04	-0.06	-0.25	-0.05	-0.17	-0.05	-0.26	-0.17	-0.06
ACSL5	-0.07	-0.01	0.04	0.02	-0.12	0.06	-0.17	0.03	0.06	-0.01	0.09	0	0.07	0	-0.02	0.1	0.01	0.14	0.02	-0.02	0.06	0.05	-0.03	0.15	0.06	0.04	-0.07	0	0.03	0.14	0.01	-0.02	0.15	0.06	0.09	0.04	0.12	-0.05	0.11	-0.01	-0.02	0.02	-0.01	-0.07	0.07	0.13	0.04	0.03	0.05
ACSL6	0.02	0.08	0.1	0.14	-0.01	0.1	-0.11	0.08	0.14	0.01	0.03	0.07	0.14	0.13	0.03	0.15	-0.02	0.12	0.09	0.08	-0.01	0.15	0.15	0.14	0.03	0.09	0.09	0.03	0.01	0.08	0.05	0.11	-0.01	0.14	0.12	0.12	-0.03	-0.11	0.28	0.11	-0.01	0.1	0.17	0.1	0.08	-0.11	0.22	0.09	-0.01
ACSM1	0.01	0.05	-0.01	-0.02	0.06	0.12	0.05	0.05	-0.01	0.04	0.06	-0.01	0.03	0.08	0.02	0.03	-0.03	0.02	-0.04	-0.02	-0.06	0.09	0.04	0.02	0.08	0.07	-0.01	-0.05	0.03	0	0.01	0.04	0	0.02	0.06	0.06	0.04	0	0.04	0.04	-0.01	0.01	0.03	-0.01	0.05	0.02	0.05	-0.04	-0.05
ACSM3	-0.08	0	0.09	0.06	-0.06	0.05	0.01	0.02	0.1	-0.03	0.08	-0.08	0.06	0	-0.04	0.08	-0.03	0.02	0	0.13	-0.06	0	-0.03	0.09	0.12	0	-0.1	-0.09	0.09	0.1	0.03	0	0.05	0	0.07	0.07	0.06	0.11	0.19	-0.08	0.01	0.08	0.05	-0.03	0.07	0.01	0.01	0.04	0.01
ACSM5	-0.06	-0.04	0.03	0.01	-0.06	0.07	0.01	0.01	-0.01	-0.06	0	-0.05	-0.01	0.07	0	0.02	-0.01	0.01	0	-0.07	0.05	-0.01	-0.02	-0.03	0.04	-0.02	-0.04	-0.02	0.01	0.01	0.03	0.02	-0.18	-0.07	0.04	-0.05	0.03	0.04	0.06	0	0.03	0.02	0.01	0	-0.02	-0.04	0	-0.08	-0.01
ACSS1	0.06	0.08	0.04	0.12	-0.12	0.13	-0.21	0.1	0.13	-0.04	0.12	-0.01	0.12	0.22	0.07	0.2	0.09	0.1	0.13	0.16	-0.04	0.1	0.08	0.15	0.03	0.04	0.02	0.01	0.11	0.2	0.12	0.12	0.05	0.11	0.17	0.18	0.01	0.09	0.23	0.11	-0.05	0.11	0.21	0.04	0.17	0.05	0.17	-0.01	0.08
ACSS2	-0.06	-0.11	-0.21	-0.16	-0.04	-0.12	0.06	-0.16	-0.1	-0.03	0.12	0.03	-0.21	-0.19	-0.05	-0.2	-0.12	-0.15	-0.21	0.15	-0.1	-0.19	-0.22	-0.05	-0.09	-0.15	-0.16	-0.1	-0.05	-0.13	-0.16	-0.18	0.03	-0.17	-0.19	-0.1	0.09	-0.05	-0.26	-0.26	0.02	-0.11	-0.24	-0.05	-0.11	0.03	-0.22	-0.1	-0.08
ACSS3	-0.02	-0.02	-0.02	-0.11	0.03	-0.04	0.01	-0.02	-0.07	0.02	-0.12	-0.01	-0.09	-0.12	-0.04	-0.05	0.05	-0.11	-0.05	0.04	-0.03	-0.04	-0.02	-0.1	0.03	0.05	0.03	0	-0.02	-0.11	-0.03	-0.04	-0.18	-0.08	-0.08	-0.09	0.03	-0.1	-0.11	-0.05	0.01	-0.08	-0.08	-0.04	-0.05	0	-0.05	-0.03	-0.1
ACTA1	-0.02	0.05	0.09	0.08	0.01	0.1	-0.02	0.02	0	0.01	0	-0.05	0.06	0.17	0.04	0.17	0.04	0.17	0.09	-0.01	-0.07	0.1	0.1	0.07	0.12	0.1	0.1	-0.01	0.01	0.1	0.12	0.05	0.12	0.07	0.09	0.05	-0.13	0	0.14	0.13	-0.04	-0.01	0.15	0	0.05	0.07	0.17	0.16	-0.03
ACTA2	0	-0.1	0.04	-0.06	0	-0.07	0.09	-0.05	-0.04	0.02	-0.15	-0.02	-0.1	-0.11	-0.02	-0.16	0.03	-0.04	0.06	-0.19	0.09	-0.07	-0.06	-0.09	-0.01	-0.03	0.04	0.09	-0.08	-0.04	-0.04	-0.09	-0.15	-0.1	-0.09	-0.1	-0.06	-0.02	-0.27	0.03	0.03	-0.05	-0.13	-0.11	-0.11	-0.02	-0.09	0.03	0.09
ACTB	0.01	-0.01	0.11	0	-0.02	0.02	-0.03	-0.06	-0.02	0	-0.1	-0.01	0.03	-0.08	0.05	-0.03	-0.01	0.01	0.09	-0.18	0.16	0	0.04	0	-0.01	0.08	0.07	0.12	0.03	0.08	0.02	-0.03	0.11	0.03	0.01	-0.02	0.07	0	-0.13	0	0.01	-0.01	-0.04	-0.02	-0.02	0.06	-0.02	-0.01	0.02
ACTC1	-0.05	-0.05	0.12	-0.01	0.05	-0.02	0.14	-0.08	-0.1	-0.05	-0.11	-0.01	0.01	-0.07	-0.01	-0.07	-0.02	0	0.09	-0.28	0.09	-0.09	0.07	-0.08	-0.02	0.08	0.06	0.07	-0.01	0.09	0.02	-0.04	-0.04	-0.04	-0.03	-0.09	0	-0.1	-0.16	0.02	-0.01	0	-0.02	-0.09	-0.08	0.03	-0.05	0	0.03
ACTG1	0.12	0.01	0.05	-0.04	0	0.03	0.12	0	-0.02	0.05	-0.03	-0.06	0	-0.07	-0.07	-0.08	0.03	0.01	0	-0.08	0.15	0.01	0	-0.05	-0.07	0.08	0.05	0.04	-0.01	-0.06	-0.09	-0.06	0	0.05	-0.08	-0.09	0.06	0	-0.02	0	0.03	-0.05	-0.05	-0.12	-0.1	0.04	-0.06	-0.07	0.08
ACTG2	0.13	0.02	0.09	-0.02	-0.04	-0.01	0.08	-0.04	-0.05	-0.01	-0.18	-0.07	-0.03	-0.04	0	-0.04	-0.05	0	0.07	-0.14	0.03	-0.08	0.05	-0.09	0	0.12	0.11	0.07	-0.02	-0.05	0.02	0	0.01	-0.03	-0.02	-0.08	-0.02	0.02	-0.04	0.1	0.03	-0.04	-0.02	-0.05	-0.07	0.07	-0.01	0.04	-0.04
ACTL10	-0.01	0	-0.02	0	-0.05	0.08	-0.12	0.04	0	-0.03	0.12	-0.01	0	0.02	0.01	0.05	-0.04	0.09	-0.06	0.13	-0.17	0.08	-0.02	0.07	0.03	0.02	-0.05	-0.01	-0.05	-0.01	0.04	0.03	0.16	-0.02	0.04	0.04	0.11	-0.03	0.14	0.05	-0.04	0.03	-0.01	0.04	0.11	-0.01	0.13	0	-0.07
ACTL6A	-0.1	0.04	-0.02	0.11	0.03	0	0.08	0.07	-0.01	-0.03	0.07	-0.02	0.03	0.04	0.03	0.03	0.07	0.03	-0.04	0.1	-0.12	-0.03	0.04	0.01	0.04	0	-0.05	-0.07	0.03	0.03	0.01	0.01	0.05	0.02	0.05	0.04	-0.04	-0.02	0.08	0.01	0.01	0.02	0.09	0.06	0.04	0.02	0.02	-0.03	-0.06
ACTL6B	-0.01	0.05	0.09	0.14	-0.01	0.1	0.02	0.16	0.1	0.07	0	0.04	0.16	0.19	-0.01	0.16	0	0.18	0.04	0.02	-0.13	0.15	0.16	0.1	0.05	0.09	0.04	-0.02	0.03	0.06	0.05	0.15	0.06	0.1	0.15	0.06	-0.01	-0.02	0.26	0.18	0.01	0.07	0.18	0.12	0.13	-0.11	0.17	0.01	0.02
ACTL7A	0.13	0.04	0.08	0.12	-0.03	0.09	-0.08	0.02	0.01	0	0.02	-0.02	0.12	0.11	0.05	0.1	0.05	0.13	0.08	-0.1	0.09	0.04	0.06	0.06	0.02	0	-0.01	0.06	0.07	0.1	0.12	0.1	-0.01	0.05	0.08	0.04	0.09	0.03	0.11	0.06	0.04	0.05	0.11	-0.01	0.04	0.1	0.06	0.08	0.06
ACTL7B	0.14	0.07	0.03	0.05	-0.02	0.09	-0.1	0.05	0.01	0.06	0.03	-0.01	0.03	0.09	0.03	0.03	0.01	0.12	0	-0.02	-0.1	-0.03	0.01	0.05	-0.01	-0.01	0	-0.03	0.05	0.04	0.09	0.06	0.09	0.04	0.07	-0.03	-0.02	0.06	0.02	0.03	0.09	-0.02	0.07	-0.02	0	0.03	0.01	0.05	0.03
ACTL8	0.07	0.01	-0.04	0.05	-0.02	0	-0.03	-0.05	-0.05	-0.01	0.1	0.02	0.01	0.12	-0.02	0.09	0.01	-0.01	-0.06	0.15	-0.11	-0.03	-0.05	0.01	0.09	-0.08	-0.1	0.02	0.1	0.04	0.15	0.03	0.02	0	0.05	0.04	-0.05	0.06	0.19	0.02	0.06	0.05	0.1	-0.01	0.04	0.03	0.01	0.06	0.01
ACTL9	0.07	0.08	0.09	0.08	-0.06	0.14	-0.24	0.09	0.04	-0.04	-0.03	0	0.09	0.1	0.05	0.1	0.05	0.16	0.1	-0.13	0.06	0.13	0.09	0.12	0.03	0.15	0.15	0.08	0.09	0.19	0.15	0.08	0.13	0.1	0.1	0.1	-0.06	0.03	0.07	0.15	0.01	0.09	0.09	0.01	0.1	0.05	0.11	0.12	0.05
ACTN1	0.02	-0.17	-0.16	-0.23	0.01	-0.21	0.22	-0.27	-0.24	-0.06	-0.12	0	-0.29	-0.36	-0.12	-0.39	-0.06	-0.27	-0.2	-0.1	0.06	-0.31	-0.25	-0.25	-0.17	-0.23	-0.1	-0.03	-0.11	-0.2	-0.25	-0.29	-0.2	-0.27	-0.29	-0.25	0	-0.02	-0.52	-0.22	0.06	-0.22	-0.38	-0.21	-0.25	0.08	-0.33	0.01	-0.02
ACTN2	0.06	0.05	0.13	0.1	-0.06	0.11	-0.17	0.04	0.06	0	-0.06	-0.01	0.11	0.24	0.06	0.17	-0.01	0.16	0.12	-0.03	-0.03	0.08	0.16	0.06	0.11	0.05	0.08	0.07	0.11	0.12	0.14	0.09	-0.11	0.06	0.11	0.06	-0.13	0.15	0.19	0.15	0.02	0.08	0.18	0.07	0.09	-0.03	0.1	0.02	0.04
ACTN3	0.11	-0.01	0.04	0.06	-0.04	0.05	0.02	0.03	-0.02	-0.01	0	0	0.06	0.06	0	0.05	0.05	0.06	0.03	-0.16	0.03	0.01	0.02	0	-0.01	0.03	0.03	0.06	0.04	0.07	0.09	0.04	0.08	0.01	0.04	0.02	-0.03	0.03	-0.03	0.06	-0.03	-0.02	0.03	0	0.06	0.1	0.01	-0.01	0.07
ACTN4	0.05	-0.19	-0.17	-0.31	0.01	-0.18	0.22	-0.33	-0.21	-0.06	-0.07	0	-0.36	-0.39	-0.15	-0.37	-0.09	-0.33	-0.26	-0.01	-0.09	-0.35	-0.33	-0.27	-0.15	-0.25	-0.13	-0.08	-0.13	-0.24	-0.24	-0.32	-0.06	-0.35	-0.3	-0.21	0.11	0.03	-0.48	-0.27	0.1	-0.19	-0.43	-0.17	-0.22	0.06	-0.35	-0.05	-0.11
ACTR10	-0.04	0.02	0.01	-0.1	0.08	-0.02	0.16	-0.02	-0.05	0	0	0.02	-0.1	-0.11	0	-0.1	0.02	-0.08	-0.09	-0.03	0.06	-0.06	-0.09	-0.16	-0.06	-0.1	-0.04	0.07	-0.06	-0.13	-0.04	-0.01	-0.15	-0.12	-0.1	-0.09	0.01	0.12	-0.15	0	0	-0.05	-0.15	-0.01	-0.04	-0.03	-0.07	0.01	0.05
ACTR1A	0.05	-0.05	0.07	-0.07	-0.04	-0.07	0	-0.06	-0.07	0.01	-0.18	-0.03	-0.04	-0.19	-0.03	-0.11	-0.06	-0.01	0.06	-0.22	0.14	-0.04	0.04	-0.05	-0.08	0.03	0.07	0.06	0.01	-0.03	-0.02	-0.07	0.06	-0.04	-0.08	-0.07	0.04	0.03	-0.18	-0.01	0	-0.08	-0.06	-0.01	-0.09	-0.06	-0.08	0.07	0
ACTR1B	0.02	0.06	0.08	0.04	-0.04	0.03	-0.05	0.02	0.04	-0.04	0.08	0	0.05	0.06	-0.03	0.1	0.02	0.05	0.03	0.03	-0.05	0.12	0.01	0.09	0.06	0.08	0.03	-0.01	0.01	0.09	0.05	0.01	-0.07	0.08	0.04	0.06	0	-0.02	0.11	0.07	-0.08	0.01	0.08	-0.07	0.02	-0.04	0.15	0.04	0
ACTR2	-0.08	0.02	0.18	0.14	-0.06	0.13	-0.08	0.07	0.08	0.02	-0.01	0	0.18	0.15	0.04	0.16	0.12	0.17	0.18	-0.21	0.22	0.13	0.17	0.11	0.12	0.14	0.16	0.1	0.06	0.21	0.12	0.12	0.23	0.17	0.09	0.12	0.04	-0.04	0.16	0.17	-0.03	0.13	0.21	0.06	0.05	0.07	0.11	-0.19	0.08
ACTR3	-0.06	-0.05	0.16	-0.02	-0.01	0.08	0.01	0.05	-0.01	0.01	-0.11	-0.07	-0.01	0.01	-0.01	0	0.13	0.02	0.06	-0.24	0.15	0.02	0.01	-0.05	0.04	0.07	0.06	0.05	0.01	0.1	0.05	0.01	0.16	-0.05	0.01	-0.05	0.07	-0.07	-0.04	0.02	0.01	0.06	0.02	-0.08	-0.04	0.09	-0.02	-0.21	0.04
ACTR3B	-0.07	0.05	0.01	0.1	-0.01	0.06	-0.02	0.1	0.05	0.04	0.01	0.02	0.18	0.18	0	0.14	0.01	0.18	0.1	0.12	-0.07	0.17	0.13	0.18	0.05	0.1	0.05	0.02	0.06	0.08	0.08	0.12	0.15	0.2	0.13	0.16	-0.09	0.02	0.29	0.12	0.01	0.07	0.28	0.13	0.13	-0.11	0.18	-0.03	-0.02
ACTR3C	0.08	-0.01	-0.1	-0.11	0.04	-0.05	0.09	-0.05	0.01	0.02	0.2	0.06	-0.09	-0.12	-0.07	-0.08	-0.05	-0.13	-0.21	0.23	-0.18	-0.1	-0.16	-0.05	0.02	-0.11	-0.21	-0.06	-0.02	-0.08	-0.06	-0.09	0.13	-0.15	-0.02	-0.12	0.09	0.07	0.03	-0.15	0	-0.05	-0.16	-0.03	0.02	0.02	-0.15	0.09	-0.06
ACTR5	-0.01	0.06	0.04	0.12	0.01	0.07	-0.08	0.01	0.02	0.03	0.05	0.01	0.11	0.14	0.04	0.13	-0.06	0.2	0.08	0.07	0.07	0.02	0.05	0.08	0.04	-0.01	0	-0.05	0.18	0.14	0.07	0.1	0.16	0.07	0.17	0.05	0.01	-0.04	0.24	0.08	-0.02	0.06	0.18	0.11	0.11	0	0.07	-0.02	0.05
ACTR6	-0.12	0.06	0.07	0.21	0.01	0.11	-0.07	0.14	0.14	0.01	0	-0.02	0.18	0.19	0.06	0.19	0.08	0.16	0.12	0.13	-0.07	0.13	0.18	0.1	0.07	0.1	0.07	-0.01	0.1	0.08	0.12	0.2	0.11	0.16	0.25	0.12	-0.01	-0.01	0.32	0.14	-0.04	0.05	0.28	0.19	0.13	-0.05	0.17	-0.1	0.05
ACTR8	0	0.11	0.22	0.19	-0.04	0.18	-0.16	0.1	0.11	-0.01	-0.07	-0.03	0.18	0.24	0.1	0.27	0.08	0.23	0.25	-0.19	0.19	0.18	0.25	0.14	0.1	0.21	0.24	0.13	0.16	0.22	0.23	0.22	0.02	0.21	0.21	0.2	-0.07	-0.01	0.2	0.18	-0.04	0.11	0.28	0.03	0.12	0.02	0.27	-0.04	0.04
ACTRT2	0.02	0.07	0.1	0.11	0.01	0.09	-0.05	0.08	0.02	0	0.01	-0.03	0.11	0.2	0.06	0.15	0.05	0.17	0.08	-0.1	0.03	0.09	0.11	0.07	0.07	0.02	0.07	0.03	0.12	0.14	0.08	0.13	-0.17	0.06	0.13	0.07	-0.04	0.06	0.17	0.08	0.04	0.09	0.17	0.06	0.09	0.03	0.14	0.03	0.06
ACTRT3	-0.02	-0.12	-0.15	-0.08	0.05	-0.1	0.1	-0.21	-0.24	-0.03	0.08	-0.03	-0.13	-0.18	-0.13	-0.24	0.02	-0.07	-0.22	0.03	0.07	-0.23	-0.16	-0.12	-0.07	-0.11	-0.17	-0.07	-0.03	-0.06	-0.08	-0.12	-0.07	-0.14	-0.17	-0.15	0.05	-0.03	-0.18	-0.14	0.03	-0.11	-0.17	-0.11	-0.12	0.06	-0.21	-0.01	0.02
ACVR1	0.06	-0.16	-0.17	-0.29	0	-0.21	0.2	-0.22	-0.16	-0.03	-0.18	-0.05	-0.33	-0.33	-0.15	-0.34	-0.01	-0.33	-0.18	-0.08	0.01	-0.27	-0.23	-0.3	-0.14	-0.18	-0.03	-0.07	-0.18	-0.3	-0.22	-0.26	-0.31	-0.32	-0.32	-0.19	0.12	0.1	-0.44	-0.23	0.05	-0.16	-0.39	-0.14	-0.21	0	-0.26	0.06	-0.05
ACVR1B	-0.01	-0.07	-0.1	0.02	0.05	-0.07	0.16	-0.09	-0.01	0.04	0.19	0.01	0.04	-0.07	-0.04	-0.04	-0.15	-0.05	-0.13	0.27	-0.21	-0.08	-0.06	0.09	-0.02	-0.05	-0.11	-0.16	-0.01	-0.11	-0.11	-0.04	-0.02	0.01	-0.04	0.02	0.08	0.01	0.07	-0.07	0.02	-0.08	-0.01	-0.04	-0.03	-0.07	-0.08	-0.05	0.02
ACVR1C	0.06	0	-0.19	-0.01	-0.01	-0.02	0.16	-0.08	0.01	-0.01	0.18	0.01	-0.06	0.07	-0.04	0.02	-0.03	-0.01	-0.15	0.19	-0.14	-0.06	-0.13	-0.02	-0.03	-0.16	-0.09	-0.09	-0.08	-0.04	-0.04	-0.05	0.04	-0.03	-0.07	0.02	-0.01	0	0.08	-0.04	-0.02	0	-0.02	-0.05	-0.07	0.02	0.04	0.05	0.02
ACVR2A	0.01	-0.08	-0.12	-0.18	0.1	-0.17	0.29	-0.21	-0.12	0	0.06	-0.03	-0.17	-0.18	-0.14	-0.17	-0.06	-0.17	-0.16	0.28	-0.1	-0.15	-0.15	-0.12	-0.12	-0.08	-0.02	-0.15	-0.13	-0.19	-0.14	-0.1	-0.27	-0.14	-0.16	-0.08	0.04	0.17	-0.12	-0.14	0.01	-0.14	-0.19	-0.03	-0.1	-0.13	-0.11	0.07	-0.04
ACVR2B	0.09	0.06	0.07	0.23	0.04	0.06	-0.05	0.11	0.15	0.03	0.1	0.01	0.19	0.24	0.02	0.26	0.08	0.15	0.08	0.16	-0.1	0.19	0.17	0.19	0.08	0.1	0.09	-0.14	0.19	0.12	0.05	0.17	0.11	0.22	0.19	0.18	-0.06	-0.01	0.37	0.13	-0.06	0.05	0.29	0.07	0.11	0.01	0.18	-0.02	0.06
ACVR2B-AS1	0.06	0.1	0.05	0.04	0.04	0.02	0	-0.01	0.03	0.03	0.04	0.03	0.03	0.08	-0.03	0.11	0.02	-0.01	-0.01	0.08	0.03	0.04	0.02	0.04	-0.04	0.06	0.02	-0.07	0.06	-0.01	-0.01	0.05	0	0.07	-0.02	0.09	0.02	0.01	0.18	0.04	-0.01	-0.07	0.07	0.04	0.06	-0.04	0.1	0.03	-0.05
ACVRL1	0.01	-0.04	0.05	0.06	-0.05	0.08	-0.01	0.01	-0.06	0.03	0	-0.04	0.06	0.04	0.01	0.04	-0.04	0.12	0.02	-0.04	-0.08	0.01	0.07	0.11	0.11	-0.01	0.03	-0.05	0.04	0.09	0.12	0.08	0.15	0.05	0.07	0.03	0	-0.05	0.04	0.02	0.07	0.06	0.09	-0.07	0.01	-0.04	0.04	0.04	0.01
ACY3	0.01	0.02	0.04	0.12	-0.1	0.1	-0.13	0.11	0.03	-0.04	0.16	-0.01	0.12	0.09	0.02	0.13	0.05	0.11	0.09	0.04	-0.04	0.07	0.01	0.14	0.14	-0.04	-0.01	0.07	0.05	0.18	0.11	0.04	0.18	0.09	0.16	0.11	-0.03	-0.01	0.12	0.1	-0.01	0.07	0.14	0.02	0.14	0.11	0.13	0.07	0.06
ACYP1	-0.04	0.11	0.07	0.26	0.07	0.13	0.08	0.14	0.13	0.02	-0.07	0.07	0.19	0.23	0.08	0.18	0.06	0.22	0.09	0	0.05	0.11	0.13	0.09	0.07	0.02	0.03	-0.02	0.12	0.1	0.05	0.18	0.06	0.16	0.26	0.12	-0.08	0.04	0.25	0.21	0.02	0.14	0.27	0.2	0.14	-0.01	0.19	-0.03	0.04
ACYP2	0.12	0.06	0.05	0.02	0	0.04	-0.08	-0.01	0.03	-0.02	0.03	0.01	0	-0.02	0.01	0.03	-0.01	0.01	0.06	-0.07	0.08	0.03	0.01	-0.06	0.01	0.06	0.05	0.07	-0.09	0	0	0.05	-0.09	0.01	0.05	0	-0.03	0.09	-0.09	0.04	-0.03	0.04	0	0.04	0.02	0.02	0.07	0.11	-0.04
ADA	0.03	0.05	0.13	0.16	-0.09	0.11	-0.19	0.16	0.08	-0.01	0.01	0.01	0.19	0.28	0.12	0.17	-0.05	0.18	0.17	-0.12	0.2	0.09	0.12	0.15	-0.09	-0.03	0.08	0.13	0.15	0.24	0.15	0.1	0.14	0.15	0.22	0.02	-0.14	0.03	0.13	0.17	0.03	0.11	0.22	0.12	0.16	0.05	0.01	-0.04	0.18
ADAD1	0.06	0.08	0.16	0.17	-0.01	0.14	-0.17	0.19	0.12	0.03	0.1	0	0.22	0.21	0.05	0.2	0.06	0.18	0.14	-0.04	-0.05	0.14	0.18	0.17	0.14	0.12	0.09	0.07	0.12	0.22	0.21	0.19	0.13	0.19	0.16	0.14	-0.05	0.03	0.24	0.16	-0.05	0.13	0.22	0.1	0.17	0.07	0.19	0.03	0.08
ADAD2	0.03	0.02	0.05	0.07	0.02	0.09	-0.14	0.01	0.01	0.02	0.05	0.02	0.11	0.14	-0.02	0.06	-0.02	0.06	-0.04	-0.06	-0.03	0.02	0.01	0.04	0.01	-0.04	-0.05	0.03	0.08	0.08	0.07	0.07	-0.21	0.04	0.05	-0.02	-0.01	-0.02	0.1	0.09	0.05	0.06	0.11	-0.03	0.06	0.03	0.03	0.04	0.05
ADAL	0	0.02	0.09	0.12	0.05	0.05	-0.03	0.04	0.05	0	-0.13	0.02	0.12	0.14	0.11	0.13	0	0.18	0.12	-0.18	0.12	0.06	0.13	-0.01	0.08	0.06	0.11	0.06	0.11	0.14	0.09	0.12	-0.18	0.1	0.13	0	-0.05	-0.06	0.15	0.15	-0.06	0.19	0.25	0.04	0.05	0	0.13	0	-0.01
ADAM10	-0.05	-0.06	-0.05	-0.06	-0.05	-0.06	0.07	-0.05	-0.05	-0.07	0.06	-0.01	-0.11	-0.11	-0.01	-0.05	-0.03	-0.12	-0.08	0	0.08	-0.04	-0.12	0	-0.05	-0.06	-0.02	0.01	0.02	0.01	-0.06	-0.1	-0.06	-0.07	-0.08	-0.04	0.1	-0.04	-0.13	-0.14	-0.08	-0.05	-0.09	-0.06	-0.05	0.07	-0.11	-0.03	0.03
ADAM11	0.05	0.06	0.02	0.11	-0.1	0.07	-0.09	-0.02	-0.01	0.05	-0.03	-0.04	0.09	0.14	0.02	0.09	-0.01	0.05	0.05	-0.07	-0.11	-0.01	0.08	0.1	0.08	-0.05	-0.04	0	0.1	0.03	0.11	0.06	0.16	0.09	0.06	0.04	-0.07	0.03	0.13	0.12	0.02	0.15	0.16	0.03	0.07	0	0.06	0.08	0.02
ADAM12	0.03	-0.12	-0.01	-0.17	-0.02	-0.11	-0.02	-0.07	-0.08	0	-0.14	0	-0.13	-0.26	-0.03	-0.19	0.02	-0.12	-0.01	-0.28	-0.01	-0.11	-0.09	-0.2	0	-0.05	0.06	0.1	-0.14	-0.1	-0.07	-0.12	-0.21	-0.22	-0.17	-0.18	-0.02	-0.08	-0.32	-0.03	0.01	-0.08	-0.21	-0.14	-0.14	-0.05	-0.12	0.02	-0.05
ADAM15	0.01	-0.11	-0.27	-0.16	-0.09	-0.13	-0.02	-0.22	-0.23	-0.03	0.08	0.01	-0.19	-0.21	-0.05	-0.21	-0.15	-0.24	-0.23	0.15	-0.16	-0.23	-0.29	-0.1	-0.06	-0.28	-0.23	-0.04	-0.08	-0.23	-0.1	-0.25	0.14	-0.19	-0.21	-0.21	0.1	-0.05	-0.29	-0.16	0.11	-0.17	-0.27	-0.12	-0.12	0.03	-0.28	0.09	-0.07
ADAM17	-0.11	-0.04	-0.03	0.06	0.06	0.02	0.1	0.03	-0.06	0.05	0.06	0.01	0.03	0.07	-0.03	-0.09	0.03	-0.06	-0.01	-0.06	0.11	-0.05	-0.06	-0.02	0	-0.01	-0.09	-0.02	-0.01	0.03	-0.04	0.03	-0.01	-0.01	0.02	-0.03	0.04	-0.05	-0.02	-0.09	-0.02	-0.01	0.04	0.06	-0.05	0.01	-0.14	-0.19	0.07
ADAM18	0.04	0.11	0.13	0.17	0.02	0.15	-0.15	0.11	0.13	0.03	0.03	-0.01	0.15	0.16	0.06	0.17	0.05	0.18	0.11	-0.1	0.04	0.12	0.14	0.09	0.12	0.07	0.1	0.08	0.09	0.2	0.12	0.13	0.06	0.11	0.14	0.12	0.01	-0.07	0.2	0.16	0.01	0.15	0.21	0.04	0.07	0.01	0.14	0.02	0.05
ADAM19	0.1	-0.02	0.04	-0.1	-0.03	-0.04	0.07	-0.1	-0.1	0	-0.19	-0.03	-0.11	-0.09	-0.07	-0.12	-0.03	-0.02	-0.01	-0.19	0.09	-0.08	-0.09	-0.17	-0.04	-0.09	0.06	0.1	-0.14	-0.01	-0.02	-0.07	-0.07	-0.13	-0.07	-0.09	-0.08	0	-0.19	0.1	-0.01	-0.05	-0.16	-0.05	-0.06	-0.05	-0.07	0.05	-0.02
ADAM1A	0	0.15	0.15	0.25	0.01	0.18	-0.05	0.19	0.23	0.09	0.04	-0.01	0.28	0.3	0.08	0.32	0.07	0.25	0.2	0.12	-0.03	0.29	0.25	0.17	0.15	0.19	0.11	0.05	0.03	0.19	0.19	0.24	0.27	0.26	0.23	0.25	-0.1	-0.02	0.49	0.2	0	0.12	0.33	0.13	0.2	-0.06	0.31	-0.04	0.06
ADAM2	0.08	-0.02	0.1	0.05	0.01	0.02	0.04	0.06	0.09	0	0.04	0	0.09	0.08	0.07	0.08	-0.06	0.1	0.08	-0.07	0.04	0.09	0.08	0.05	0.07	0.05	0.05	0.08	0.04	0.07	0.14	0.08	-0.1	0.06	0.05	0.03	0	-0.03	0.09	0.05	0.01	0.1	0.1	0.02	-0.07	0	0.07	0.07	0
ADAM20	0.03	0.05	0.04	0.11	0.02	0.11	0	0.13	0.03	0.03	0.1	-0.03	0.13	0.11	0	0.12	-0.02	0.17	0.04	-0.07	0	0.06	0.07	0.03	0.11	0	-0.01	0.01	0.07	0.08	0.11	0.11	0.16	0.1	0.11	0.01	-0.06	0.02	0.11	0.11	0.01	0.11	0.15	0.05	0.04	0.03	0.13	0.06	0.01
ADAM21	-0.03	0.02	-0.03	0.03	0.07	0.01	0	0.07	0.02	0.03	-0.04	-0.03	0.02	0.01	0.06	0.01	0.07	0.03	0.01	0.07	0	0.04	0	-0.01	0.06	-0.02	-0.05	0.04	0.04	0.01	0	0.08	-0.25	0.02	0.05	-0.02	-0.03	0.1	-0.02	0.06	0.01	0.05	0.03	0.05	-0.07	0.04	0.01	0.07	0.08
ADAM22	0.07	0.14	0.18	0.29	0.01	0.17	-0.1	0.19	0.21	-0.01	0.05	0.01	0.28	0.26	0.11	0.28	0	0.29	0.17	0.13	0.07	0.26	0.27	0.25	0.14	0.14	0.09	-0.03	0.17	0.19	0.13	0.23	0.03	0.29	0.26	0.24	-0.03	-0.03	0.39	0.13	-0.04	0.13	0.37	0.19	0.2	-0.09	0.26	0.01	0.04
ADAM23	-0.06	-0.01	-0.04	-0.03	-0.01	-0.03	-0.05	-0.02	-0.06	0.02	-0.08	-0.05	-0.03	0.04	0	-0.01	-0.06	-0.04	-0.02	-0.04	-0.04	-0.03	0	-0.07	0.01	0.03	0.06	-0.01	0	-0.06	-0.01	-0.05	0.02	-0.01	-0.05	-0.02	-0.13	0.02	-0.05	0.06	-0.01	0.07	0.03	0	-0.01	-0.14	0	0.03	0
ADAM28	-0.02	0.01	-0.01	0.04	-0.04	0.05	-0.02	0.09	0.06	-0.03	0.16	0	0.09	0.12	-0.02	0.11	0.11	0.16	0.03	-0.03	0	0.1	0.02	0.06	0.06	0.08	-0.01	0.02	-0.01	0.1	0.07	0.03	0.22	0.06	0.06	0	-0.05	-0.03	0.19	-0.02	-0.01	0.03	0.04	0	0.04	0.09	0.05	-0.03	0.04
ADAM29	0.07	0.09	0.08	0.08	0.07	0.1	0.07	0.12	0.03	-0.02	-0.01	-0.02	0.03	0.14	0.03	0.13	0.07	0.12	0.02	-0.05	-0.02	0.06	0.01	-0.01	0.05	0.02	0	0.03	0.08	0.1	0.13	0.04	-0.04	0.03	0.09	0.02	-0.02	0.03	0.18	0.05	-0.07	0.14	0.12	0.05	0.03	0.03	0.11	0.09	-0.03
ADAM30	-0.06	0.07	0.07	0.15	-0.06	0.19	-0.08	0.12	0.05	-0.02	0.07	0.02	0.13	0.18	0.1	0.18	-0.03	0.21	0.05	-0.07	-0.02	0.09	0.06	0.12	0.12	0.01	0.02	0.03	0.06	0.17	0.14	0.14	0.05	0.11	0.18	0.08	-0.06	-0.1	0.15	0.08	0.02	0.06	0.18	0.07	0.13	0.06	0.13	-0.11	0.08
ADAM32	-0.02	-0.03	-0.02	-0.04	-0.02	0.02	-0.02	0	-0.05	0.01	-0.02	0.03	0	-0.01	0.03	-0.08	-0.01	0.03	0	-0.11	0.09	-0.02	0	0.02	-0.03	0.12	0.05	0.05	-0.04	0.01	0.04	-0.04	-0.17	-0.02	0.01	-0.05	-0.09	-0.04	-0.08	-0.01	0	0.01	-0.05	0	-0.03	0.03	0.01	-0.06	-0.04
ADAM33	0.05	0.08	0.14	0.12	0.06	0.13	-0.09	0.07	0.08	0.04	0	-0.03	0.12	0.08	0.04	0.14	0.04	0.16	0.17	-0.14	0	0.12	0.16	0.07	0.12	0.15	0.11	0.07	0.08	0.18	0.12	0.11	-0.17	0.11	0.13	0.09	0.03	-0.03	0.15	0.16	-0.03	0.14	0.16	-0.02	0.08	0	0.14	-0.09	0.03
ADAM3A	-0.01	-0.01	0	-0.04	-0.04	0.02	-0.05	0	0.02	0	-0.03	-0.03	-0.06	-0.02	-0.01	-0.01	-0.03	-0.02	-0.02	-0.05	-0.05	0.02	-0.08	0	-0.02	-0.09	-0.08	-0.01	0.03	0.05	-0.02	0	-0.12	-0.02	-0.07	0	-0.09	0	-0.05	0.04	0.01	0.02	-0.06	-0.11	-0.02	0	0.01	0.02	-0.03
ADAM5	0.07	0.02	-0.04	0.01	0.02	0.02	0.16	0.04	-0.06	0.02	0.07	-0.07	-0.04	0.16	-0.05	-0.02	0.03	0.05	-0.08	0	-0.08	-0.03	-0.05	-0.04	0.05	-0.06	-0.09	-0.08	0.01	-0.03	0.04	0.01	-0.05	-0.04	-0.02	-0.02	-0.05	0.08	0.05	0.01	0.02	0	-0.01	-0.03	0.02	0.07	-0.02	0.16	-0.03
ADAM6	0.02	0.04	0.03	0.04	-0.06	0.05	-0.05	-0.02	-0.01	0	0.04	-0.04	0.04	0.03	0.03	0.06	-0.03	0.03	-0.02	0.05	-0.07	-0.09	0.02	0.03	0.03	-0.07	-0.02	-0.05	0.03	-0.02	0	0.08	0.1	0	0.06	0.02	0.02	0.03	0.06	0.04	0	0	0.06	0.04	0.04	0.01	0.06	0.01	0.01
ADAM7	-0.07	0.05	0.1	0.09	-0.03	0.12	-0.12	0.13	0.03	0.09	0.02	-0.04	0.12	0.18	0.04	0.14	0.05	0.18	0.09	-0.13	0.07	0.17	0.09	0.05	0.01	0.11	0.1	0.08	0.1	0.11	0.09	0.09	-0.12	0.06	0.12	0.08	-0.01	-0.01	0.22	0.07	-0.01	0.12	0.16	0.01	0.11	-0.04	0.08	0	0.03
ADAM8	-0.05	0.01	0.02	0.08	-0.02	0.05	-0.1	0.01	-0.05	0.04	0.19	-0.01	0.09	0.14	0	0.12	0.09	0.13	-0.09	0.02	0.03	0.08	-0.07	0.04	0.06	-0.06	-0.12	0	0.06	0.15	0.1	0.02	0.2	0.05	0.09	0.01	-0.04	0.04	0.17	0.01	-0.03	0.08	0.03	-0.01	0.06	0.12	0.02	0.1	0.18
ADAM9	-0.07	-0.15	-0.21	-0.3	0.05	-0.23	0.32	-0.26	-0.31	-0.11	-0.09	-0.03	-0.32	-0.44	-0.16	-0.47	-0.09	-0.36	-0.26	-0.03	-0.04	-0.36	-0.34	-0.24	-0.08	-0.19	-0.18	-0.09	-0.13	-0.29	-0.18	-0.3	-0.11	-0.36	-0.34	-0.32	0.07	0	-0.56	-0.26	0.04	-0.2	-0.44	-0.18	-0.25	0.01	-0.41	-0.06	-0.02
ADAMDEC1	0.07	0.09	0.13	0.18	-0.02	0.11	-0.08	0.12	0.14	-0.01	0	0.02	0.13	0.18	0.11	0.22	0.07	0.24	0.21	-0.07	0.09	0.17	0.15	0.1	0.11	0.12	0.15	0.12	0.06	0.16	0.15	0.17	0.13	0.14	0.15	0.19	-0.13	-0.18	0.19	0.18	0.01	0.14	0.21	0.03	0.07	0.01	0.22	0.05	0.08
ADAMTS1	0.15	-0.14	0.02	-0.19	-0.03	-0.12	-0.02	-0.11	-0.12	0	-0.16	-0.05	-0.17	-0.19	-0.05	-0.21	-0.06	-0.21	-0.03	-0.16	0.06	-0.16	-0.1	-0.22	-0.1	-0.07	0.04	0.03	-0.1	-0.15	-0.1	-0.13	-0.19	-0.18	-0.24	-0.16	0.03	0.02	-0.31	-0.12	0.04	-0.11	-0.22	-0.15	-0.19	-0.02	-0.16	0.04	-0.05
ADAMTS10	0.09	0.02	0.16	0.1	-0.02	0.1	-0.07	0.02	0.03	0.01	-0.05	0.07	0.11	0.06	0.05	0.08	-0.04	0.05	0.09	-0.18	0	0.04	0.09	0.07	0.05	-0.02	0.11	0.02	0.09	0.11	0.07	0.06	0	0.07	0.1	0.03	-0.07	0.05	0	0.06	0.06	0.03	0.11	0.01	0.07	0.05	0.08	0.14	0.07
ADAMTS12	0.01	0.02	0.11	0.05	-0.05	0.04	0.01	0	0	-0.04	-0.06	-0.03	0.05	0.06	0.04	0.02	-0.01	0.07	0.02	-0.18	0.06	0	0.06	0.01	0.07	0.06	0.04	0.03	0.07	0.1	0.04	0.07	0.02	0.01	0.07	0.02	-0.07	0.01	0.05	0.1	0	0.02	0.04	0.02	0.03	0.03	0.03	0.08	-0.01
ADAMTS13	0.09	-0.01	0.06	0.01	-0.03	0.04	-0.04	0.04	0	0.03	0.05	0.06	0.12	0.07	0.03	0.05	-0.05	0.03	0.02	-0.01	0.01	0.07	0.03	0.11	-0.05	0	0.01	0	-0.01	0	0	0.03	-0.06	0.08	0.03	0.04	-0.06	-0.11	0.08	0.05	0	0.08	0.04	0.04	0.06	-0.03	0.04	0.01	0.07
ADAMTS14	0.13	0.06	0.08	0.03	0.04	0.02	0.03	0.1	0.12	0.03	-0.01	0.02	0.03	-0.05	0.02	0.04	0.09	0.01	-0.01	0.01	-0.03	0.06	0.06	0.05	-0.04	0.07	0.05	-0.04	0.05	0.05	0.04	0.02	0.23	0.03	0.01	0.07	0.05	-0.08	0.12	0.04	0	0.05	0.01	0	0.03	0.04	0.05	-0.04	-0.09
ADAMTS15	0.16	-0.06	-0.05	-0.2	0.02	-0.13	0.09	-0.13	-0.08	-0.01	-0.04	-0.04	-0.17	-0.25	0.03	-0.25	-0.12	-0.24	-0.1	-0.07	-0.04	-0.16	-0.15	-0.13	0	-0.13	-0.08	0.01	-0.09	-0.17	-0.1	-0.15	-0.07	-0.18	-0.14	-0.17	0.07	0.17	-0.32	-0.12	0.02	-0.06	-0.22	-0.11	-0.13	0.05	-0.22	0.18	-0.07
ADAMTS16	0	-0.04	0	-0.11	-0.01	-0.05	-0.07	-0.01	-0.12	0.02	-0.09	0.06	-0.15	-0.05	-0.03	-0.11	-0.06	-0.13	-0.08	-0.12	-0.08	-0.1	-0.13	-0.09	-0.04	-0.16	-0.04	0.01	-0.02	-0.11	-0.03	-0.12	-0.25	-0.16	-0.09	-0.11	0	0.05	-0.16	-0.06	0.05	-0.1	-0.15	-0.11	-0.06	-0.02	-0.13	0.05	-0.02
ADAMTS17	0.08	0.07	-0.07	0.12	-0.04	0.08	0.01	0.01	0.05	-0.01	0.11	-0.03	0.12	0.2	0.03	0.15	0.04	0.16	0.11	0.12	-0.08	0.08	0.1	0.08	0.02	0.02	0.02	-0.01	0.06	0.13	0.09	0.08	0.03	0.13	0.08	0.17	-0.08	0.05	0.16	0.12	0.03	0.03	0.21	0.03	0.12	0.08	0.13	0.08	0
ADAMTS18	0.13	0.08	0.07	0.06	0.12	0.08	0.06	0.11	0.08	0.05	0.03	-0.04	-0.01	0.1	0.07	0.05	0.04	0.1	0	-0.05	0.04	0.02	0.01	0.01	0.02	0	0.02	0	0.1	0.02	0.04	0.07	0.01	-0.02	0.08	0.01	0.05	0.17	0.1	0.06	0.03	0.07	0.11	0.05	0.07	0.01	0.09	0.05	0
ADAMTS19	0.03	0.08	0.11	0.13	0.03	0.08	-0.28	0.07	0.09	0.05	0.03	0.03	0.15	0.14	0.04	0.23	0.07	0.22	0.13	-0.04	0.02	0.18	0.15	0.11	0.04	0.17	0.17	0.04	0.11	0.18	0.13	0.15	0.1	0.17	0.11	0.18	0.04	-0.08	0.25	0.11	0.02	0.09	0.21	0.06	0.11	0.02	0.21	0.01	0.09
ADAMTS2	0.03	0.05	0.1	-0.02	-0.03	0.03	-0.1	0.05	0.04	0.09	-0.09	0.01	0.05	0.01	0.07	0.02	0.01	0.03	0.14	-0.23	0.06	0.08	0.13	0.02	-0.01	0.08	0.14	0.08	-0.02	0.07	0.05	0.08	-0.27	0.01	0	-0.05	-0.12	0.02	-0.06	0.14	0.04	0.08	0.05	-0.07	0.02	-0.07	0.06	-0.06	-0.03
ADAMTS20	0	0.05	0.13	0.13	0	0.1	-0.11	0.12	0.11	0.04	0.03	0	0.14	0.25	0.06	0.14	0.03	0.22	0.09	-0.06	0.11	0.14	0.1	0.09	0.12	0.14	0.05	0.06	0.09	0.15	0.15	0.13	0.18	0.14	0.19	0.09	-0.02	0.08	0.27	0.11	-0.01	0.17	0.23	0.07	0.11	0	0.14	-0.13	0.1
ADAMTS3	0.05	-0.1	0.11	-0.03	-0.02	-0.05	-0.03	-0.09	-0.02	-0.02	-0.15	-0.07	-0.02	-0.07	-0.02	-0.08	0.03	-0.09	0.06	-0.14	0.04	-0.07	0.03	-0.07	0.01	-0.02	0.01	0	0	0.01	-0.06	-0.01	-0.23	-0.05	-0.11	-0.02	0.02	-0.01	-0.09	-0.05	0.02	-0.04	-0.05	-0.1	-0.09	-0.04	-0.09	-0.06	-0.04
ADAMTS5	0.1	-0.02	0.17	-0.03	-0.01	0.02	0.01	0.05	0.04	0.01	-0.14	0.02	0.05	-0.04	0.06	-0.03	0.02	0.01	0.12	-0.22	0.03	0.03	0.09	-0.05	0.05	0.16	0.13	0.11	0	0.05	0.04	0.03	-0.11	-0.05	-0.04	-0.05	-0.08	-0.01	-0.07	0.06	0	-0.01	0.02	-0.04	0	-0.05	0.03	0	-0.06
ADAMTS6	0.07	-0.01	0.14	-0.07	0.05	-0.02	-0.11	0.01	-0.05	0	-0.18	0.02	-0.03	-0.11	0	-0.08	0.1	0	0.08	-0.33	0.18	0.01	0.04	-0.06	0.03	0.05	0.09	0.06	-0.02	0.03	-0.03	-0.02	-0.05	-0.08	-0.06	-0.09	-0.02	-0.06	-0.17	0.07	0	-0.01	-0.07	-0.03	-0.08	0.01	-0.05	-0.02	0.08
ADAMTS8	0.11	0.05	0.1	0.05	0	0.06	-0.08	0.02	-0.02	0.05	0.04	0	0.06	0.08	0.06	-0.03	-0.02	0.05	0.02	-0.07	-0.1	0.02	0.02	0.02	0.09	-0.04	-0.06	0.03	0.05	0.01	0.07	0.11	-0.09	-0.01	0.05	-0.05	-0.02	0.08	0	0.03	0.01	0.07	0.03	0.03	0.03	-0.01	0.01	0.09	0.01
ADAMTS9	0.03	-0.07	0.03	-0.17	-0.07	-0.03	0.07	-0.05	-0.02	0.01	-0.1	-0.08	-0.14	-0.1	-0.06	-0.11	0.01	-0.15	-0.09	-0.06	-0.02	-0.05	-0.16	-0.1	-0.07	-0.16	-0.07	0	-0.06	-0.08	-0.09	-0.13	-0.08	-0.14	-0.12	-0.03	-0.08	0.06	-0.1	-0.13	-0.01	-0.05	-0.17	-0.12	-0.1	0.01	-0.09	0.04	-0.11
ADAMTS9-AS2	0.03	0	0.08	0.02	0.01	0.03	-0.02	0.09	0.03	-0.01	0.03	-0.03	0.06	0.02	0.01	0.05	-0.04	0.03	0.03	-0.06	-0.02	0.03	0.02	0.05	0.09	-0.01	0.01	0.02	0.08	0.08	0.03	0.07	-0.04	0.07	0.01	0.02	-0.02	-0.01	0.07	0.06	-0.05	0.04	0.06	-0.01	0.03	-0.01	0.03	0.01	-0.06
ADAMTSL1	-0.02	0.05	0.15	0	-0.06	0.04	-0.21	0.06	-0.02	0	-0.21	0.01	0.03	-0.01	-0.03	0.02	0.07	0.07	0.12	-0.29	0.01	0.08	0.09	-0.02	0	0.16	0.12	0.05	-0.02	0.01	0.04	0.05	-0.04	-0.01	-0.03	0	-0.08	-0.1	-0.04	0.1	0	-0.03	-0.01	-0.05	-0.02	-0.03	0.09	-0.09	-0.02
ADAMTSL2	0.06	0.1	0.03	0.11	0.02	0.06	-0.02	0.08	0.08	0.02	0.09	0.04	0.09	0.14	0.02	0.15	-0.02	0.13	0.02	0.07	-0.15	0.03	0.07	0.07	0.03	-0.03	0.02	0.04	0.03	0.09	0.08	0.12	-0.02	0.09	0.04	0.06	-0.1	0.07	0.17	0.08	0.01	0.02	0.11	0	0.08	-0.01	0.16	0.1	0
ADAMTSL3	-0.01	-0.04	0.09	-0.02	-0.03	0.02	-0.03	0.02	-0.02	0	0.07	-0.04	0.01	-0.02	-0.01	-0.05	-0.05	-0.01	-0.01	-0.08	0	0.03	-0.08	0.04	-0.03	-0.01	-0.06	0.02	-0.01	0.07	-0.01	-0.02	0.06	-0.07	-0.01	-0.11	0.07	0.05	0	-0.04	0.04	-0.02	-0.01	-0.02	0.04	0.02	-0.05	-0.01	0
ADAMTSL4	-0.03	-0.05	0.05	0.03	-0.03	-0.01	-0.11	-0.06	-0.15	0.03	0.04	0.08	0.02	0.06	0.02	0.03	0.01	0.06	0	-0.19	0.11	-0.01	0.04	0	-0.01	0.05	0.07	0	0.04	0.1	0.02	0.03	-0.18	-0.03	0	-0.03	-0.07	-0.1	-0.02	0.03	0	0.04	0.01	-0.05	-0.02	0.02	-0.09	0.01	0.02
ADAMTSL5	0.07	0	-0.11	-0.03	-0.05	0.01	-0.1	-0.03	-0.08	-0.05	0.08	0	-0.04	0.01	0	-0.01	-0.08	0.03	-0.07	-0.03	-0.04	-0.08	-0.09	0	0	-0.13	-0.1	-0.01	0.1	0.03	0.04	-0.01	0.19	-0.04	0.01	0	0.03	0.07	-0.05	-0.01	0.03	0.02	0.02	-0.02	-0.01	0.06	-0.04	0.06	0
ADAP1	-0.08	-0.07	-0.24	-0.05	-0.03	-0.05	0.08	-0.16	-0.14	-0.04	0.32	0.04	-0.03	-0.04	-0.07	-0.11	-0.11	-0.03	-0.2	0.25	-0.19	-0.1	-0.22	0.04	-0.03	-0.11	-0.21	-0.06	-0.08	-0.03	-0.1	-0.17	0.12	-0.03	-0.1	-0.05	0	0.01	-0.04	-0.18	0.03	-0.04	-0.14	-0.13	-0.01	0.05	-0.17	0.04	0.07
ADAP2	-0.07	0.03	0.07	-0.01	-0.05	0.07	-0.1	0.06	-0.03	0.06	0.05	0	0.06	0.01	0	-0.01	0.01	0.01	-0.04	-0.04	0.01	0.13	-0.07	0.06	0.07	-0.06	-0.16	0.04	0.03	0.04	0.05	-0.03	0.07	0	0.05	-0.06	-0.04	-0.08	0.03	-0.04	-0.03	0.11	0.04	-0.01	0.02	0.03	-0.08	-0.07	0.06
ADAR	0.07	0.1	0.14	0.22	-0.11	0.17	-0.26	0.17	0.11	0.06	0.2	0.07	0.28	0.23	0.14	0.25	0.02	0.15	0.13	0.09	0.03	0.25	0.14	0.22	0.1	0.14	0.03	0.08	0.03	0.22	0.16	0.18	0.19	0.2	0.22	0.12	0.05	-0.04	0.28	0.18	-0.01	0.11	0.25	0.12	0.18	0.02	0.15	0.09	0.16
ADARB1	0.09	0.05	0.12	0.1	-0.1	0.04	-0.2	0.07	0.1	0.02	-0.16	0.08	0.11	0.17	0.09	0.17	0.03	0.11	0.15	-0.14	0.1	0.12	0.17	0.05	0	0.1	0.14	0.04	0.1	0.12	0.01	0.04	-0.11	0.11	0.11	0.15	-0.13	0.08	0.1	0.14	0.01	0.14	0.17	0.05	0.03	0.03	0.1	-0.01	0.02
ADARB2	0.05	0.07	0.04	0.11	-0.01	0.07	-0.03	0.11	0.04	-0.02	0.09	-0.02	0.13	0.18	-0.01	0.09	-0.05	0.14	0.05	0.03	-0.09	0.05	0.08	0.07	0.07	0.05	0	0.03	0.05	0.09	0.09	0.15	0.06	0.11	0.12	0.07	-0.01	0.18	0.19	0.12	-0.02	0.04	0.14	0.05	0.06	0.01	0.12	0.18	0.04
ADARB2-AS1	0.06	0.07	0.04	0.15	-0.02	0.14	-0.11	0.19	0.1	0.05	0.11	0	0.14	0.25	0.08	0.15	0.05	0.25	0.09	-0.04	-0.01	0.19	0.14	0.15	0.11	0.1	0.01	0.05	0.05	0.14	0.11	0.15	0	0.14	0.16	0.11	-0.02	0.07	0.27	0.13	-0.03	0.16	0.19	0.1	0.08	0.03	0.19	0.03	0.07
ADAT1	-0.04	0.01	-0.04	0.05	-0.01	0.05	-0.03	0.03	-0.03	0.01	0.08	0	0.04	0.11	-0.01	0.04	0.1	0.13	0.03	-0.06	-0.03	0.05	0.02	-0.02	0	-0.01	0.01	0.07	-0.1	0.07	0.01	-0.01	0.01	0.08	0.01	0.09	-0.07	-0.02	0.08	-0.02	0.02	0.07	0.05	0	0.02	-0.01	0.1	0.02	-0.01
ADAT2	-0.04	0.11	0.12	0.36	0.01	0.19	-0.12	0.16	0.14	0.05	0.1	0	0.37	0.4	0.12	0.34	0.06	0.38	0.23	0.04	0.12	0.18	0.26	0.29	0.18	0.16	0.11	-0.02	0.23	0.34	0.22	0.28	0.18	0.35	0.35	0.21	-0.03	0.01	0.45	0.15	-0.01	0.18	0.47	0.16	0.19	0.04	0.24	-0.08	0.19
ADAT3	0.1	0.11	0.06	0.19	-0.09	0.16	-0.09	0.09	0.02	0.04	-0.06	-0.03	0.16	0.21	0.1	0.17	-0.04	0.16	0.12	0.02	0.03	0.12	0.13	0.11	0.1	-0.01	0.03	0.03	0.12	0.11	0.18	0.14	0.31	0.15	0.17	0.05	0	0.05	0.19	0.12	0.08	0.1	0.22	0.14	0.12	0	0.11	0.12	-0.03
ADC	0.13	-0.04	-0.02	-0.07	-0.04	-0.08	0.04	-0.1	-0.05	0.04	-0.19	0.03	-0.08	-0.09	-0.03	-0.09	-0.03	-0.13	-0.01	-0.15	0.05	-0.09	-0.04	-0.04	-0.07	-0.19	0	0.01	0.01	-0.02	-0.09	-0.09	-0.14	-0.08	-0.09	-0.05	-0.02	0.03	-0.16	-0.03	0.08	-0.01	-0.06	-0.09	-0.08	0.01	-0.12	-0.03	-0.06
ADCK1	-0.02	0.08	-0.04	0.06	-0.03	0.11	0.06	0.01	0.02	-0.05	0.15	0.07	0.09	0.16	0.05	0.1	-0.06	0.06	0	0.17	-0.01	0	0.02	0.09	-0.01	-0.03	-0.09	0	0.09	0.03	0.08	0.09	0.03	0.08	0.13	0.12	-0.03	0.05	0.16	-0.02	0.09	0.06	0.11	0.07	0.05	0	0.1	0.05	-0.03
ADCK2	-0.02	0.02	-0.09	-0.02	-0.18	0.03	-0.19	0.05	0.06	0	0.03	0.07	-0.04	0	-0.03	-0.02	-0.09	-0.09	-0.02	0.06	-0.06	0.03	-0.06	0.03	0.03	-0.15	-0.12	0	-0.02	-0.06	-0.04	-0.01	-0.08	0.04	-0.04	0.07	0.02	-0.17	-0.03	-0.04	0.04	0.01	0	0.03	0.05	-0.01	0.05	-0.08	-0.05
ADCK3	0.07	0.15	0.13	0.27	-0.08	0.2	-0.22	0.19	0.19	0.07	0.06	0	0.3	0.28	0.09	0.37	0.04	0.22	0.16	0.18	-0.11	0.3	0.27	0.29	0.14	0.21	0.11	-0.07	0.18	0.2	0.15	0.24	0.17	0.29	0.27	0.23	-0.07	-0.1	0.48	0.19	-0.01	0.11	0.39	0.15	0.21	-0.08	0.29	-0.03	-0.02
ADCK4	0.01	0.03	0.01	0.03	-0.04	0.09	0.12	-0.04	-0.01	-0.01	0.11	0.03	0.02	0.12	0.01	0.05	-0.1	0.04	-0.05	0.05	-0.08	-0.05	-0.04	0.05	-0.01	-0.1	-0.11	-0.01	0.05	0	0.05	-0.01	0.04	-0.01	0.1	0.01	0	0.04	0.1	0	0.07	0.07	0.1	0.05	0.03	0	-0.05	0.03	0.02
ADCK5	0.01	0.06	0	0.09	-0.07	0.13	-0.1	-0.05	0.06	-0.03	0.26	0.06	0.02	0.06	0.04	0.15	-0.01	0.11	0.03	0.1	-0.01	0.04	-0.02	0.09	0	-0.08	-0.07	0.02	0.08	0.14	0.09	0.03	0.23	0.1	0.06	0.11	0.01	0.03	0.11	0.02	0.01	0.02	0.06	-0.05	0.07	0.13	0.1	0.07	0.04
ADCY1	0	0.07	-0.11	0	-0.04	-0.03	-0.15	0.02	0.02	-0.06	-0.03	0.02	-0.02	0.11	0.04	0.05	0	-0.02	-0.03	0.12	-0.15	0.05	0.03	0	-0.03	-0.06	0	0.03	0	-0.1	-0.01	-0.02	-0.05	0.03	-0.02	0.06	-0.1	-0.02	0.11	0.05	0.01	0.07	0.05	0.02	0.04	-0.04	0.08	0.03	-0.08
ADCY10	0.08	0.06	0.04	0.11	-0.06	0.11	-0.1	0.03	0.03	0.01	0.11	0.06	0.12	0.16	0.01	0.11	0	0.1	0.03	-0.05	-0.07	0.04	0.06	0.05	0.09	-0.02	0.01	-0.01	0.08	0.13	0.09	0.15	-0.14	0.06	0.15	0.06	-0.06	0.05	0.15	0.07	-0.02	0.12	0.19	0	0.1	0.04	0.09	0.06	0.02
ADCY2	0.01	0.08	0.04	0.01	0	0.1	-0.15	0.17	0.07	-0.03	-0.08	0.01	-0.02	0.18	0.02	0.1	0.03	0.05	0.05	-0.06	-0.05	0.13	0.05	-0.03	0.09	0.03	0.03	0.06	0.04	0	0.09	0.12	-0.09	0.02	0.11	0.08	-0.03	0.04	0.18	0.13	-0.02	0.12	0.07	0.03	0.07	0.01	0.19	0	-0.08
ADCY3	-0.08	0.05	-0.06	0.12	-0.15	0.07	-0.19	0.02	-0.04	0.02	0.14	0.04	0.05	0.19	0.03	0.01	0	0.08	-0.01	0.05	-0.01	0.01	-0.07	0.09	0.02	-0.14	-0.03	0.01	0.01	0.1	0.06	0.01	0.19	0.06	0.02	0.05	-0.02	-0.04	0.01	0	0.05	0.03	0.09	0	0.12	0	0.03	0.14	0.12
ADCY4	-0.09	-0.01	0.02	0.07	0	0.07	-0.04	0.06	0.03	-0.02	0.06	0.04	0.11	0.1	0.03	0.09	0.02	0.05	-0.01	-0.01	-0.04	0.02	0.02	0.09	0.08	-0.01	-0.04	0	0.06	0.08	0.04	0.09	0.05	0.05	0.07	0.05	0.05	0.01	0.11	0.06	0.03	0.14	0.08	0.02	0.06	0.08	0.11	-0.08	0
ADCY5	-0.04	0.06	0.1	0.07	0.05	0.09	-0.04	0.11	0.12	0.1	0.13	0.01	0.09	0.12	0.02	0.09	0.06	0.15	0.01	0	-0.01	0.13	0.05	0.01	0.07	0.08	0.01	0.07	0.05	0.07	0.08	0.1	-0.21	0.08	0.1	0.07	0	0.08	0.2	0.12	-0.04	0.11	0.09	0.03	0.06	-0.01	0.13	0.02	0.07
ADCY6	-0.06	-0.1	-0.15	-0.25	0.01	-0.14	0.17	-0.18	-0.14	-0.02	0.06	-0.02	-0.21	-0.31	-0.11	-0.25	-0.12	-0.31	-0.22	0.16	-0.21	-0.12	-0.2	-0.08	-0.07	-0.11	-0.1	-0.11	-0.13	-0.26	-0.17	-0.21	0.15	-0.19	-0.22	-0.08	0.13	0.02	-0.25	-0.18	-0.02	-0.19	-0.34	-0.13	-0.12	-0.03	-0.19	-0.01	-0.1
ADCY7	-0.01	-0.04	0.1	0.19	0	0.08	-0.07	0.03	0.02	0.05	0.12	0.06	0.16	0.09	0.1	0.1	0.01	0.1	0.07	-0.08	0.12	0.08	0.03	0.1	0.08	-0.03	0.02	-0.02	0.07	0.28	0.06	0.05	0.05	0.11	0.09	0	-0.02	-0.01	0.05	0.03	0.01	0.13	0.16	-0.01	0.06	0	-0.03	-0.02	0.14
ADCY8	0.1	0.04	-0.01	0.01	-0.05	0.06	-0.03	-0.02	-0.07	-0.02	0.02	-0.03	-0.02	0.05	-0.03	-0.06	-0.04	-0.07	-0.04	-0.04	-0.08	-0.1	-0.03	0.02	-0.01	-0.05	-0.06	-0.03	-0.02	-0.04	0.03	0.04	0.01	-0.07	-0.03	-0.05	0.01	0.02	-0.01	-0.03	0.08	-0.04	-0.05	0.01	0	0.01	-0.01	0.06	-0.03
ADCY9	0.01	-0.04	-0.08	-0.22	0.01	-0.17	-0.02	-0.03	-0.04	0.02	-0.13	0.08	-0.2	-0.25	0.02	-0.22	-0.07	-0.29	-0.08	-0.08	-0.05	-0.07	-0.1	-0.12	-0.1	-0.1	0.01	0.03	-0.15	-0.2	-0.15	-0.16	-0.11	-0.17	-0.23	-0.09	0.04	-0.01	-0.31	-0.1	0.03	-0.05	-0.23	-0.1	-0.08	-0.09	-0.14	-0.01	-0.13
ADCYAP1	0.07	0.09	0.08	0.09	0.02	0.06	0	0.1	0.13	0.03	-0.07	0.01	0.07	0.11	0.02	0.12	0.05	0.13	0.07	-0.12	0.02	0.11	0.12	0.05	0.05	0.04	0.01	0.06	0.05	0.1	0.07	0.08	-0.05	0.07	0.11	0.06	-0.07	0.14	0.21	0.11	0.02	0.07	0.13	0.04	0.05	-0.03	0.12	0.18	-0.07
ADCYAP1R1	0.02	0.05	0.11	0.17	0.01	0.08	-0.15	0.2	0.12	0.05	0.06	0.03	0.14	0.17	0.07	0.16	0	0.15	0.1	-0.03	-0.02	0.1	0.13	0.09	0.11	0.09	0.05	0.06	0.06	0.14	0.12	0.14	-0.07	0.11	0.13	0.05	-0.06	-0.03	0.2	0.14	-0.03	0.1	0.17	0.05	0.12	-0.03	0.14	0.04	0.04
ADD1	0	0	0.09	-0.05	-0.02	0	-0.13	-0.06	0.02	0.02	-0.11	0.05	-0.02	-0.13	-0.01	0	0	-0.03	0.04	-0.12	0.12	0.05	0.09	-0.04	-0.01	0.16	0.18	0	-0.07	-0.02	-0.05	-0.03	0	-0.01	-0.12	-0.02	0.04	-0.04	-0.11	-0.04	-0.01	-0.09	-0.06	-0.03	0	0.04	0.04	-0.04	-0.03
ADD2	0.06	0.03	0.14	0.17	-0.01	0.07	-0.19	0.18	0.18	0.08	0	0.02	0.19	0.15	0.09	0.15	0.08	0.08	0.11	-0.05	0.03	0.19	0.21	0.12	0.06	0.16	0.11	0	0.1	0.12	0.06	0.14	0.01	0.18	0.16	0.1	-0.09	0.06	0.24	0.12	0	0.13	0.28	0.13	0.04	-0.06	0.13	0.02	0.05
ADD3	-0.04	-0.02	0.04	-0.07	-0.06	0.07	-0.07	-0.02	0.07	-0.02	0.07	-0.05	0.07	-0.02	-0.01	0.05	-0.02	0.06	0.02	0.05	0.02	0.1	0.02	0.09	0	0.02	0.09	0.02	0.05	0.1	0	-0.01	0.18	0.08	0.04	0.15	0.03	0.06	0.06	0.01	-0.05	0.03	0.02	0.01	0.08	-0.03	0.08	-0.02	0.04
ADGB	0.09	0	0.04	0.01	-0.01	0.08	-0.13	-0.01	0.04	0	0.01	0.02	0.05	0	0.02	0.09	0	0.08	-0.03	-0.02	-0.09	0.03	-0.01	0.03	0.02	-0.05	0.02	0.04	0.06	0.03	0.07	0	0.04	0.02	0.01	0.05	-0.03	0	0.08	0.01	0.03	0.02	0.07	-0.03	0.02	-0.02	0.02	0.07	0.03
ADH1A	0.05	0	-0.06	0.01	-0.07	0.05	-0.14	-0.03	-0.02	0.01	0.04	-0.07	-0.01	0.08	-0.02	0.02	0	0.01	0.01	-0.04	-0.07	0.01	-0.01	0.01	0.01	-0.1	0	0.01	0.04	0.04	-0.05	0.04	0.04	-0.03	0.03	0.06	-0.01	0.06	-0.02	-0.03	0	0.04	0.03	0.02	0.03	0.03	0.03	0.07	0.08
ADH1B	-0.03	0.04	0.03	0.07	0.02	0.09	-0.09	0.08	0.05	0	0.06	0.01	0.05	0.07	0.05	0.11	-0.02	0.09	0.06	-0.02	0.08	0.06	0.1	0.09	0.11	0.03	0.03	-0.02	0.12	0.11	0.13	0.13	0.12	0.05	0.1	0.1	0	-0.01	0.12	0.04	0.03	0.04	0.07	0.05	0.03	0.07	0.12	-0.08	0
ADH1C	-0.08	-0.06	-0.13	-0.04	-0.05	-0.02	-0.1	-0.09	-0.05	-0.05	0.09	-0.01	-0.06	-0.05	-0.02	-0.07	0.03	0.01	-0.11	0.08	-0.09	-0.12	-0.11	-0.01	-0.01	-0.07	-0.09	-0.05	0	-0.03	0	-0.05	0.06	-0.06	-0.02	-0.11	0.01	-0.01	-0.06	-0.08	0.01	-0.05	-0.05	0.02	-0.05	-0.02	-0.07	-0.01	0.02
ADH4	-0.01	-0.02	-0.07	-0.01	0.01	0.01	-0.04	0.01	-0.04	-0.02	-0.02	-0.01	-0.03	0.07	-0.1	-0.05	-0.03	-0.01	0.01	-0.08	-0.09	-0.04	-0.01	-0.04	0.03	0.03	-0.04	-0.05	0.04	-0.01	0.04	0.01	-0.13	-0.05	0.02	0.01	0	-0.13	-0.05	0.02	0.02	0.02	0.02	-0.09	-0.05	0.01	0.02	-0.01	-0.07
ADH5	0.1	-0.05	0.05	-0.01	0	-0.04	-0.03	-0.08	-0.05	0.02	-0.18	-0.08	0	-0.1	0	-0.11	-0.01	-0.08	0.1	-0.14	0.14	-0.09	0.07	-0.06	-0.08	0.07	0.12	0.01	0.03	0.03	-0.04	0.03	-0.07	-0.01	-0.01	-0.07	-0.08	0.04	-0.18	-0.02	0.06	-0.04	0	-0.05	-0.06	0	-0.08	-0.1	0.09
ADH6	0.02	-0.02	0.01	0.07	-0.02	0.12	-0.04	0.07	0.02	0	0.05	-0.02	0.03	0.06	-0.01	0.09	0.01	0.09	0.04	0	-0.09	0.05	0.06	0.07	0.1	0.05	0.04	-0.07	0.02	0.05	0.07	0.15	0.25	0.05	0.17	0.08	-0.01	0.04	0.15	0.02	0.04	0.07	0.1	0.06	0.04	-0.02	0.11	0.1	0.01
ADH7	0.04	-0.04	-0.07	0.04	0	-0.03	0.02	-0.02	-0.08	-0.04	0	-0.09	0	0.09	-0.01	0.05	0	0.1	0.04	-0.06	0.05	0.03	-0.03	0.03	0	0.01	0.06	0.05	0.02	0.08	0.09	0.07	-0.08	0.03	0.01	0.03	-0.06	0.01	0.09	0.01	0	-0.01	0.1	-0.04	-0.01	0	0.08	0.06	0.08
ADHFE1	0.02	-0.02	0.03	-0.06	0.06	0.02	-0.03	0.02	0.02	0.03	0.07	0.01	-0.06	0	0.04	0.03	-0.04	0.02	-0.05	-0.07	0.02	0.08	-0.02	-0.02	0.08	-0.07	-0.01	0.04	0.04	0.01	0.05	0.01	-0.1	-0.01	-0.04	0	0	0.08	-0.01	-0.05	-0.01	0.08	-0.09	-0.02	-0.02	0.06	0.04	0.02	0.04
ADI1	-0.06	0.04	-0.09	-0.02	0.02	0.05	0.05	-0.05	-0.01	0	-0.02	-0.01	-0.05	-0.01	-0.05	-0.03	-0.04	0.02	-0.08	0.09	-0.08	-0.03	-0.04	-0.05	-0.03	-0.01	-0.02	0	-0.03	-0.04	0.03	-0.05	0.11	-0.04	-0.05	-0.05	0.01	0.15	-0.02	0.01	-0.02	0.05	-0.02	0.01	-0.05	-0.02	-0.01	0.14	-0.08
ADIG	-0.02	0.04	0.05	0.11	0.08	0.06	-0.04	0.1	-0.02	0.05	0.01	-0.04	0.07	0.17	0	0.09	0.02	0.15	0.09	-0.08	-0.03	0.19	0.09	0.06	0.11	0.13	0.04	0.03	0.04	0.15	0.13	0.12	0.15	0.05	0.16	0.07	0	0.02	0.17	0.11	0.01	0.14	0.17	0.05	0.1	0.02	0.17	-0.01	0.06
ADIPOQ	-0.02	0.01	-0.05	-0.06	0.02	0.04	0.05	0.03	-0.05	-0.05	0.1	-0.02	-0.02	0.06	-0.05	-0.03	-0.03	-0.02	-0.1	0.07	-0.12	-0.12	-0.09	0	0.12	-0.15	-0.08	-0.08	0.07	-0.05	0.02	0.03	-0.25	-0.05	0	-0.03	0.03	0.05	0.04	-0.04	0.07	0.03	0.01	-0.04	-0.02	0.08	-0.02	0.01	-0.04
ADIPOR1	-0.01	0	-0.17	-0.11	-0.03	-0.04	-0.03	-0.01	-0.09	-0.04	0.08	0.03	-0.18	0	-0.03	-0.05	-0.06	-0.17	-0.16	0.21	-0.22	-0.03	-0.16	-0.06	-0.06	-0.16	-0.11	-0.07	-0.09	-0.18	-0.1	-0.08	0.06	-0.14	-0.03	-0.08	0	0.06	-0.08	-0.1	-0.06	-0.06	-0.16	-0.02	-0.04	-0.02	-0.07	0.1	-0.05
ADIPOR2	-0.2	-0.05	-0.01	0.06	-0.03	0.04	0.03	-0.04	0	-0.03	0.13	-0.04	0.05	0.14	0.01	0.08	-0.11	0.06	-0.02	0.03	-0.1	0.04	0.01	0.04	0.03	-0.01	-0.03	-0.01	0.05	0.06	-0.02	-0.06	0.16	0.07	0	0.05	-0.11	-0.06	0.19	-0.04	0.02	0.04	0.05	-0.01	0.06	0.03	0.03	-0.09	-0.02
ADIRF	-0.06	-0.06	-0.23	-0.18	-0.03	-0.1	-0.02	-0.17	-0.17	0.01	0.21	0.05	-0.15	-0.22	-0.11	-0.18	-0.04	-0.11	-0.24	0.14	-0.09	-0.18	-0.25	-0.12	-0.08	-0.13	-0.2	-0.08	-0.16	-0.15	-0.15	-0.18	0.06	-0.16	-0.23	-0.13	0.09	-0.05	-0.21	-0.11	0	-0.13	-0.29	-0.13	-0.1	0.01	-0.16	0.06	0.02
ADK	-0.08	-0.09	-0.08	0	0.02	-0.06	0.05	-0.05	-0.15	0.04	0.13	0.03	0	-0.11	0.03	-0.12	-0.03	0.01	-0.15	0.04	0.11	-0.1	-0.11	-0.06	0.05	-0.15	-0.15	-0.02	-0.04	-0.03	-0.07	-0.08	-0.01	-0.07	-0.07	-0.15	0.1	-0.16	-0.15	-0.07	0.03	-0.04	-0.1	0	-0.09	0.05	-0.21	-0.08	0.06
ADM	-0.02	-0.1	-0.15	-0.25	0.01	-0.17	0.06	-0.13	-0.25	-0.04	-0.09	0.06	-0.24	-0.29	-0.04	-0.37	-0.09	-0.23	-0.18	-0.2	0	-0.26	-0.22	-0.21	-0.13	-0.14	-0.07	-0.04	-0.12	-0.25	-0.18	-0.17	-0.23	-0.28	-0.24	-0.25	-0.01	0.06	-0.5	-0.12	0.08	-0.2	-0.36	-0.13	-0.19	-0.05	-0.33	0.07	0.01
ADM2	0.16	0.06	0.02	0.07	0	0.13	0.04	0	-0.04	-0.06	0.01	-0.05	0.08	0.08	0.04	0.08	-0.05	0.04	0.03	-0.03	0.03	-0.01	0.06	0.01	0.07	0.01	-0.03	0.01	0.1	0.07	0.14	0.07	-0.03	0.02	0.08	-0.02	0.05	0.14	0.03	0.09	0.05	0.06	0.11	0	0.06	0.08	0.03	0.15	-0.01
ADM5	0.15	0.15	0.12	0.24	-0.06	0.18	-0.09	0.12	0.14	0.02	0.1	0.01	0.22	0.3	0.07	0.27	-0.01	0.31	0.08	0.03	-0.01	0.16	0.18	0.17	0.14	0.08	-0.01	-0.01	0.2	0.2	0.17	0.12	0.3	0.2	0.22	0.16	-0.08	0	0.39	0.14	0.07	0.16	0.31	0.12	0.16	0	0.11	0.16	0.05
ADNP	0.01	0.14	0.09	0.1	-0.03	0.16	-0.09	0.2	0.11	0.05	0.09	0.03	0.2	0.18	0.14	0.22	-0.05	0.15	0.13	0.07	0	0.2	0.16	0.16	0.07	0.14	0.11	0.09	0.02	0.14	0.12	0.14	0.05	0.19	0.18	0.16	0.02	-0.11	0.31	0.14	-0.05	0.11	0.18	0.08	0.13	-0.07	0.19	-0.1	0.01
ADNP2	0.05	0.11	0.13	0.25	-0.03	0.08	-0.22	0.26	0.22	0.1	0.03	-0.01	0.25	0.19	0.12	0.27	0.12	0.21	0.25	0.06	-0.02	0.26	0.29	0.19	0.09	0.21	0.15	0.07	0.18	0.18	0.17	0.24	-0.03	0.25	0.23	0.2	-0.02	0	0.35	0.16	-0.01	0.13	0.32	0.14	0.14	0	0.21	-0.02	0.11
ADO	0.01	0.11	0.09	0.1	-0.03	0.08	-0.1	0.12	0.12	0.02	-0.11	-0.08	0.12	0.1	0.05	0.12	0.05	0.08	0.21	-0.08	0.16	0.16	0.15	0.09	0.04	0.12	0.16	0.05	0.06	0.11	0.06	0.16	0	0.12	0.14	0.16	-0.04	0.01	0.09	0.15	-0.05	0.03	0.18	0.05	0.03	-0.04	0.19	0.01	0.04
ADORA1	0.04	-0.05	0.03	-0.19	-0.03	-0.1	0.11	-0.15	-0.07	0.03	-0.03	0	-0.16	-0.26	-0.08	-0.18	-0.07	-0.18	-0.16	-0.01	-0.11	-0.04	-0.2	-0.12	-0.01	-0.13	-0.13	0.01	-0.07	-0.19	-0.11	-0.17	-0.11	-0.21	-0.15	-0.13	-0.02	0.01	-0.18	-0.14	0.04	-0.08	-0.19	-0.12	-0.08	-0.02	-0.14	0.07	-0.16
ADORA2A	0.05	0.13	0.22	0.12	0.01	0.13	-0.12	0.12	0.12	0.01	0.05	-0.02	0.17	0.18	0.09	0.19	-0.09	0.19	0.21	-0.12	0.09	0.22	0.18	0.09	0.16	0.17	0.06	0.13	0.13	0.22	0.17	0.14	0.02	0.15	0.19	0.08	-0.06	0.02	0.22	0.15	-0.03	0.12	0.2	0.08	0.13	-0.03	0.18	0.05	0.03
ADORA2A-AS1	-0.05	0.08	0.07	0.07	0	0.1	-0.05	0.11	0.08	0	-0.02	-0.04	0.13	0.19	0.02	0.11	-0.02	0.14	0.07	-0.11	0.03	0.03	0.09	0.09	0.1	0.08	0.08	0.01	0.04	0.06	0.07	0.09	0.04	0.11	0.1	0.06	-0.06	0.04	0.15	0.1	0.02	0.01	0.13	0.06	0.05	-0.01	0.06	-0.01	0
ADORA2B	-0.02	-0.17	-0.22	-0.15	-0.01	-0.19	0.22	-0.29	-0.26	-0.07	0.06	0.05	-0.21	-0.29	-0.12	-0.36	-0.05	-0.23	-0.29	0.02	0.03	-0.33	-0.3	-0.18	-0.1	-0.23	-0.19	-0.15	-0.11	-0.17	-0.24	-0.27	-0.12	-0.25	-0.23	-0.24	0.06	-0.02	-0.43	-0.22	0.06	-0.14	-0.31	-0.17	-0.24	0.07	-0.36	0.03	0.01
ADORA3	0.03	0.08	0.07	0.14	-0.03	0.19	-0.04	0.14	0.13	0.06	0.05	-0.03	0.12	0.23	0.08	0.23	0.1	0.17	0.13	-0.04	-0.04	0.17	0.15	0.11	0.17	0.11	0.03	0.06	0.1	0.15	0.19	0.18	0.06	0.12	0.21	0.15	-0.03	0.03	0.26	0.13	-0.02	0.17	0.21	0.07	0.09	0.11	0.2	-0.04	0.03
ADPGK	0.02	0.01	0.03	0.15	-0.1	0.05	-0.09	0.13	0.04	-0.07	0.02	-0.05	0.13	0.19	0.12	0.21	0	0.13	0.14	-0.12	0.12	0.17	0.14	0.21	0.13	0.08	0.12	0.08	0.13	0.27	0.15	0.11	0.09	0.17	0.13	0.13	-0.08	-0.13	0.17	0.09	-0.07	0.14	0.23	0.02	0.11	0.1	0.13	-0.02	0.07
ADPRH	-0.01	0	0.05	0.05	-0.08	0.08	-0.14	-0.02	0.02	-0.01	0.01	-0.03	-0.06	0.09	0.05	0.09	0.08	0.08	-0.02	-0.04	0.01	0	-0.03	-0.03	0.06	-0.08	-0.03	0.1	0.01	0.1	0.03	0.05	0.21	-0.07	0.05	0.02	-0.03	-0.03	0.08	0.01	-0.03	0.05	0.03	-0.02	0.08	0.07	0.07	0.05	0.02
ADPRHL1	-0.04	0.03	-0.06	-0.01	0.07	0.08	0.21	-0.01	-0.06	-0.02	0.13	0.04	0.03	0	-0.03	-0.05	-0.01	0.01	-0.1	0.06	-0.02	-0.05	-0.08	-0.03	0.02	-0.06	-0.14	-0.05	-0.07	-0.08	0.05	0.04	-0.06	-0.04	0.06	-0.05	-0.03	0.06	0	0.01	-0.01	0.05	-0.01	0.04	0	-0.03	-0.01	0.09	-0.02
ADPRHL2	0.08	0.05	0.1	-0.01	0.02	0.05	-0.08	0	0.01	0.03	-0.1	0	-0.02	-0.02	-0.02	-0.03	0	-0.01	0.04	-0.09	-0.03	-0.02	0.01	-0.09	0.01	0.03	-0.01	0.03	0.05	-0.03	-0.08	0.05	-0.19	-0.04	0.02	-0.09	0.04	0.05	-0.07	0.02	0.03	-0.06	-0.04	-0.03	0	0.05	0.01	0.03	-0.06
ADPRM	-0.03	0.04	0.16	0.18	-0.03	0.12	0	0.07	0.06	-0.04	-0.05	-0.06	0.24	0.22	0.04	0.19	-0.02	0.17	0.22	-0.19	0.19	0.08	0.19	0.14	0.08	0.13	0.15	0.01	0.14	0.18	0.08	0.16	-0.01	0.17	0.18	0.06	-0.09	0	0.15	0.16	-0.01	0.07	0.27	0.08	0.08	0.01	0.12	-0.09	0.2
ADRA1A	0.07	0.05	0.03	0.05	0	0.1	0	0.02	0.02	0.01	0.05	-0.02	0.07	0.18	0.02	0.12	-0.03	0.13	-0.01	-0.02	0.03	0.01	0.01	0.05	0.1	-0.02	-0.07	0	0.04	0.05	0.1	0.08	-0.01	0.01	0.09	0	0	0.02	0.18	0.07	0.03	0.06	0.1	0.02	0.09	0.06	0.05	0.08	0.01
ADRA1B	0.06	0.02	0.04	0.04	0	0.09	-0.06	0.01	0.05	0.01	0.07	0.04	0.08	0.07	0.04	0.03	0.01	0.1	-0.03	-0.03	0.05	-0.01	0.01	-0.05	-0.01	-0.05	-0.07	0.06	0.09	0.03	0.06	0.01	-0.11	0.01	0.02	0	0.06	-0.05	0.04	0.03	0.03	0.01	0.04	-0.03	0.02	0.08	-0.03	0.04	0.03
ADRA1D	0.08	0	-0.01	-0.06	-0.09	0.04	-0.04	-0.09	-0.06	0	0.01	0	-0.02	-0.03	-0.03	-0.01	-0.08	-0.01	-0.02	-0.03	-0.03	-0.11	-0.05	-0.01	0.01	-0.11	-0.01	-0.02	-0.04	-0.05	0.07	0	-0.01	-0.04	0.02	-0.09	0.02	0.04	-0.05	0.01	0.03	-0.07	-0.07	-0.01	0.05	-0.02	-0.01	0.15	0
ADRA2A	-0.13	0.01	0.03	-0.04	-0.05	-0.02	-0.12	0.02	0.02	-0.05	-0.05	-0.06	-0.05	0.05	-0.08	0	-0.05	0.05	-0.01	0	-0.09	0.01	0.03	-0.06	-0.01	0.09	0	-0.02	-0.03	-0.02	-0.03	0	-0.07	-0.03	0	0.02	-0.02	-0.03	0.06	0.04	-0.08	0.01	0.01	-0.06	0	-0.07	0.1	-0.11	-0.05
ADRA2B	-0.01	0.07	0	0.06	-0.06	0.03	-0.13	0.05	-0.03	0	0.08	0.03	0.04	0.09	-0.01	0.06	0.05	0.06	-0.03	-0.1	-0.07	0.03	-0.02	0.02	0.03	0.02	-0.02	0.04	0.08	0.07	0.07	0.02	0.01	-0.03	0.01	0	-0.09	0.02	0.09	0.09	0.02	0.04	0.08	-0.04	0.05	0.07	0.04	0.06	0.04
ADRA2C	0.15	-0.03	-0.11	-0.07	-0.02	-0.01	0.02	-0.12	-0.07	0.07	0.06	0.04	-0.04	-0.05	-0.02	-0.13	-0.1	-0.1	-0.13	0.1	-0.11	-0.06	-0.07	0	-0.07	-0.08	-0.07	-0.08	-0.05	-0.14	-0.06	-0.08	0.07	-0.08	-0.07	-0.05	-0.04	-0.01	-0.08	-0.08	0.06	-0.01	-0.06	-0.01	-0.01	-0.07	-0.09	0.1	-0.06
ADRB1	0.01	0.01	-0.08	0.06	0.05	0.03	0.05	-0.04	0.04	0.01	0.16	0.06	0.07	0.13	0.06	0.01	-0.03	0.12	-0.06	0.1	-0.02	0.02	-0.01	0.12	0.03	0.04	-0.11	-0.02	-0.01	0.02	-0.04	0.03	0.2	0.11	0.09	0.04	-0.03	0.01	0.09	-0.07	0.04	0.11	0.07	0.09	0.03	0.03	-0.01	0.18	0.05
ADRB2	0.03	-0.11	-0.06	-0.08	-0.03	-0.07	-0.02	-0.07	-0.14	-0.02	0.08	0.01	-0.12	-0.17	0.02	-0.16	-0.04	-0.1	-0.13	-0.08	0.05	-0.14	-0.17	-0.09	-0.07	-0.22	-0.13	0.1	-0.08	-0.01	-0.06	-0.13	-0.16	-0.13	-0.17	-0.2	0.03	-0.01	-0.29	-0.08	-0.01	-0.01	-0.22	-0.13	-0.14	0.09	-0.19	0.05	0.13
ADRB3	0.09	0.07	0.08	0.1	-0.06	0.17	-0.1	0.06	0.04	0.05	0.08	-0.01	0.12	0.23	0.01	0.17	0.02	0.22	0.05	0	-0.03	0.11	0.06	0.11	0.12	0.03	-0.04	0.05	0.06	0.16	0.15	0.14	0.02	0.08	0.14	0.05	-0.01	0.05	0.22	0.08	0.01	0.16	0.13	0.03	0.07	0.07	0.1	0.03	0.06
ADRBK1	-0.01	0.09	0.09	0.28	-0.03	0.2	-0.15	0.21	0.16	0.03	0.2	0.04	0.29	0.31	0.14	0.33	0.03	0.36	0.18	0.05	0	0.27	0.23	0.31	0.16	0.22	0.08	-0.01	0.14	0.34	0.17	0.2	0.31	0.31	0.32	0.21	0	-0.04	0.38	0.17	-0.08	0.15	0.34	0.13	0.21	0.11	0.28	-0.07	0.08
ADRBK2	0.11	0.15	0.2	0.3	-0.02	0.17	-0.26	0.29	0.26	0.05	0.07	0.03	0.34	0.3	0.15	0.33	0.04	0.28	0.24	0	0.06	0.28	0.3	0.22	0.05	0.18	0.1	0.03	0.16	0.22	0.11	0.23	-0.04	0.33	0.26	0.22	-0.07	0.06	0.39	0.22	-0.03	0.24	0.38	0.19	0.18	-0.02	0.24	0.04	0.13
ADRM1	0.04	-0.08	-0.19	-0.17	-0.05	-0.11	0.05	-0.26	-0.22	-0.07	-0.09	-0.01	-0.24	-0.07	-0.1	-0.25	-0.16	-0.12	-0.22	0	-0.05	-0.32	-0.25	-0.18	-0.12	-0.25	-0.19	-0.08	-0.09	-0.17	-0.09	-0.21	0.04	-0.26	-0.17	-0.16	0.01	-0.02	-0.22	-0.15	0.05	-0.13	-0.25	-0.14	-0.1	-0.02	-0.22	0.09	-0.15
ADSL	0.13	0.08	0.17	0.26	-0.03	0.16	-0.14	0.1	0.08	0.01	-0.12	-0.05	0.23	0.31	0.1	0.21	0.03	0.29	0.23	-0.16	0.15	0.1	0.25	0.1	0.06	0.15	0.12	0.04	0.27	0.26	0.18	0.22	0.03	0.17	0.24	0.1	-0.04	0.05	0.27	0.16	0.03	0.13	0.38	0.12	0.12	0.01	0.11	0.08	0.06
ADSS	0.04	0	-0.09	0.05	0.03	0.03	0	0.03	-0.02	0	0.14	-0.04	0.06	0.04	0.01	0.05	0.08	-0.02	-0.02	0.13	-0.02	0.03	-0.01	0.04	0	-0.08	-0.06	-0.05	0.02	0.03	0.02	0	0.21	0.06	0.04	0.06	-0.02	-0.1	0.01	0.02	0.01	-0.02	0.05	0.04	0	0.04	-0.02	-0.02	0.08
ADSSL1	0.01	0.03	-0.18	-0.09	0.01	-0.05	0.18	-0.04	-0.04	-0.01	0.15	0.09	-0.04	-0.1	-0.03	-0.08	0.01	-0.12	-0.12	0.12	0.02	-0.05	-0.09	-0.07	-0.11	-0.07	-0.06	0	-0.06	-0.15	-0.12	-0.12	-0.21	-0.02	-0.15	-0.08	0.07	-0.02	-0.06	-0.08	0.01	-0.05	-0.11	0	0.02	-0.01	-0.11	0.07	0.04
ADTRP	0.06	-0.09	-0.02	-0.11	-0.07	-0.13	-0.12	-0.11	-0.12	-0.01	-0.02	0	-0.12	-0.15	-0.07	-0.13	0.02	-0.09	-0.06	-0.13	0.04	-0.16	-0.13	-0.12	-0.04	-0.15	-0.08	0.02	-0.04	0.02	-0.07	-0.06	-0.2	-0.16	-0.11	-0.13	0.01	-0.03	-0.27	-0.1	0.01	-0.09	-0.17	-0.13	-0.12	0.06	-0.12	0.08	0.1
AEBP1	0.09	0.07	0.14	0.18	-0.04	0.14	-0.06	0.13	0.15	0.02	-0.08	-0.05	0.18	0.13	0.05	0.2	0.08	0.16	0.19	-0.02	-0.02	0.12	0.24	0.09	0.01	0.13	0.16	0.05	0.07	0.19	0.12	0.18	0.05	0.21	0.1	0.21	-0.05	-0.03	0.21	0.22	0	0.05	0.19	0.09	0.09	0	0.24	-0.09	0.05
AEBP2	-0.12	-0.01	0.05	0.14	0.04	0.08	0.12	0.08	0.03	0.04	0.09	-0.06	0.14	0.13	0.05	0.07	0.03	0.13	0.04	-0.01	0.04	0.07	0.08	0.12	0.09	0.07	0.01	-0.04	0.02	0.12	0.03	0.05	0.05	0.12	0.08	0.07	-0.05	-0.01	0.14	0.06	0	0.02	0.15	0.06	0.05	0.02	0.06	-0.08	0.13
AEN	0	0.02	0.03	0.07	-0.05	0.09	-0.03	0.05	0.02	-0.02	-0.11	-0.1	0.01	0.13	-0.02	0.09	0	0.12	0.06	-0.03	0	0.1	0.02	0.1	0	0	0.06	0.01	0.11	0.07	0.11	-0.01	-0.01	0.05	0.02	0.14	-0.06	0.02	0.13	0.12	-0.03	0.01	0.13	-0.03	0.07	-0.06	0.13	0.08	0.06
AES	0.15	0.11	0.14	0.1	-0.05	0.15	-0.18	0.12	0.16	0.05	-0.08	0.01	0.19	0	0.12	0.14	-0.06	0.1	0.18	-0.07	0.06	0.18	0.21	0.17	0.05	0.12	0.13	0.09	0.03	0.1	0.11	0.14	0.24	0.2	0.15	0.09	-0.04	0.04	0.08	0.15	0.02	0.07	0.12	0.16	0.12	-0.06	0.19	0.11	0.01
AFAP1	0.06	-0.15	-0.13	-0.29	0.05	-0.18	0.18	-0.24	-0.17	-0.04	-0.11	0.02	-0.25	-0.31	-0.11	-0.36	-0.09	-0.27	-0.17	-0.01	-0.01	-0.25	-0.21	-0.25	-0.2	-0.14	-0.07	-0.01	-0.2	-0.28	-0.21	-0.22	-0.23	-0.26	-0.28	-0.18	0.03	-0.09	-0.45	-0.18	0.04	-0.23	-0.39	-0.11	-0.21	-0.06	-0.31	-0.02	-0.09
AFAP1L1	0.01	-0.15	-0.15	-0.21	0	-0.17	0.09	-0.15	-0.18	-0.08	-0.09	-0.02	-0.31	-0.21	-0.1	-0.33	-0.01	-0.24	-0.2	-0.11	-0.02	-0.27	-0.29	-0.28	-0.19	-0.24	-0.16	0	-0.13	-0.18	-0.18	-0.23	-0.26	-0.3	-0.27	-0.23	0.04	0	-0.41	-0.18	-0.01	-0.11	-0.34	-0.16	-0.21	0.05	-0.24	0.04	-0.07
AFAP1L2	-0.07	-0.12	-0.21	-0.22	0.03	-0.16	0.14	-0.12	-0.16	-0.03	0.15	-0.03	-0.14	-0.19	-0.08	-0.27	-0.05	-0.19	-0.23	0.09	-0.08	-0.18	-0.28	-0.1	-0.14	-0.25	-0.2	-0.04	-0.11	-0.14	-0.19	-0.24	-0.01	-0.14	-0.18	-0.16	0	-0.1	-0.28	-0.17	-0.02	-0.13	-0.26	-0.11	-0.15	0.06	-0.26	-0.07	0.06
AFF1	-0.02	0.06	0.12	0.13	-0.01	0.05	-0.07	0.1	0.1	0.03	-0.03	-0.03	0.1	0.04	0	0.17	0.03	0.04	0.07	-0.04	0.02	0.11	0.1	0.14	0.1	0.09	0.05	-0.01	0.13	0.19	0.05	0.07	0.08	0.11	0.14	0.09	0.03	0.03	0.21	0.07	-0.08	0.13	0.15	0.04	0.11	0.06	0.13	-0.01	0.01
AFF2	0.04	0.08	0.17	0.19	-0.04	0.2	-0.08	0.25	0.2	0.1	0.03	-0.01	0.21	0.25	0.08	0.3	0.06	0.25	0.16	-0.09	0	0.2	0.2	0.15	0.12	0.13	0.08	0.04	0.1	0.23	0.18	0.26	0.01	0.2	0.25	0.2	-0.02	-0.04	0.34	0.17	-0.02	0.2	0.3	0.1	0.13	0.05	0.26	-0.1	0.06
AFF3	0.16	0.06	0.16	0.02	-0.03	0.07	-0.22	0.11	0.09	0.06	-0.21	-0.03	0.04	0.02	0.08	0.11	0.02	0	0.16	-0.25	0.01	0.09	0.12	-0.02	0.07	0.11	0.14	0.11	-0.04	0.02	0.04	0.05	-0.17	0.03	0	0.06	-0.05	-0.04	0.04	0.19	-0.03	0.08	0.06	-0.02	-0.03	-0.01	0.18	0.02	-0.02
AFF4	-0.15	-0.11	-0.11	-0.23	0.05	-0.16	0.24	-0.21	-0.2	-0.05	-0.14	0	-0.22	-0.22	-0.12	-0.32	-0.09	-0.22	-0.14	-0.14	-0.01	-0.19	-0.17	-0.19	-0.05	-0.15	-0.04	-0.02	-0.11	-0.24	-0.15	-0.19	-0.06	-0.23	-0.24	-0.19	0.08	-0.02	-0.31	-0.15	0.02	-0.14	-0.26	-0.12	-0.2	0	-0.21	-0.06	-0.1
AFG3L1P	-0.01	0.1	0	0.2	0.01	0.14	0.05	0.08	0.09	0.02	0.08	0.03	0.11	0.24	0.02	0.12	0.02	0.25	0.05	0	-0.06	0.05	0.1	0.07	0.11	0.03	0	0.03	0.12	0.15	0.08	0.04	0.16	0.14	0.12	0.15	-0.06	0.06	0.23	0.08	0.08	0.13	0.23	0.1	0.05	0.01	0.14	0.04	0.03
AFG3L2	-0.06	0.08	-0.05	0.11	-0.05	0.14	-0.13	0.09	0.07	0.01	0.11	0.02	0.12	0.23	0.06	0.16	0	0.16	0.05	0.05	-0.01	0.07	0.04	0.07	0.02	-0.01	-0.04	0.02	0.09	0.04	0.08	0.11	0.02	0.08	0.15	0.09	-0.08	0.06	0.2	0.06	-0.04	0.06	0.19	0.08	0.06	0.01	0.12	0.08	-0.02
AFM	0.1	0.07	0.06	0.13	-0.04	0.07	-0.06	0.09	0.09	0.03	0	-0.04	0.14	0.15	0.07	0.15	0.01	0.16	0.12	-0.11	0.07	0.07	0.13	0.14	0.04	0.05	0.08	0.04	0.06	0.16	0.16	0.12	0.03	0.12	0.1	0.1	-0.02	-0.03	0.15	0.09	0.03	0.09	0.18	0.08	0.11	0	0.1	0.16	0.1
AFMID	-0.03	0.08	0.1	0.22	-0.01	0.16	-0.12	0.16	0.07	0.04	0.17	-0.03	0.23	0.31	0.08	0.3	-0.01	0.32	0.09	0.08	0.04	0.21	0.13	0.18	0.15	0.11	0.06	0.06	0.13	0.2	0.19	0.14	0.23	0.24	0.23	0.16	-0.08	-0.02	0.46	0.16	0.02	0.13	0.31	0.09	0.15	0	0.19	0.04	0.08
AFP	0.12	-0.06	-0.02	-0.1	0	-0.04	0.09	-0.01	0.04	0	-0.19	0.02	-0.09	-0.15	-0.04	-0.12	0.05	-0.11	0.03	-0.13	0	-0.09	0.01	-0.09	-0.01	0.08	0.08	-0.02	-0.03	-0.06	-0.04	-0.02	-0.17	-0.09	-0.09	-0.07	0.1	0	-0.14	-0.08	0.09	-0.09	-0.1	-0.05	-0.07	0.03	-0.06	-0.01	-0.09
AFTPH	-0.11	0.09	-0.02	0.1	-0.05	0.14	-0.09	0.12	0.12	0.01	0.33	0.01	0.1	0.2	0.02	0.21	0.02	0.12	-0.03	0.24	-0.14	0.14	-0.04	0.16	0.12	0.02	-0.09	-0.02	-0.01	0.1	0.07	0.04	0.1	0.1	0.14	0.11	0.02	0.03	0.32	0.04	-0.02	0.1	0.12	0.06	0.12	0.02	0.17	0.04	0.04
AGA	0.03	0.04	-0.02	0.02	-0.05	0.04	-0.09	0.05	0.06	-0.02	0	0.02	0.02	0	0.03	0.06	0.08	0.01	0.11	-0.07	0.1	0.06	0.06	0	0.09	0.12	0.09	0.06	0.05	0.06	0.05	0.02	-0.04	0.05	0.04	0.09	-0.02	-0.01	-0.05	0	-0.03	0.01	0.05	0.01	0.02	0.06	0.05	-0.02	0.07
AGAP1	0.01	0	-0.17	-0.13	0.05	-0.1	0.2	-0.17	-0.08	-0.03	0.04	-0.02	-0.17	-0.12	-0.12	-0.12	-0.1	-0.22	-0.18	0.33	-0.19	-0.14	-0.16	-0.09	-0.1	-0.1	-0.09	-0.15	-0.1	-0.25	-0.11	-0.16	0.01	-0.14	-0.11	-0.04	0.05	0.07	-0.08	-0.15	0.06	-0.18	-0.17	-0.03	-0.03	-0.11	-0.13	0.08	-0.12
AGAP11	0.06	-0.02	-0.15	0.01	0.02	-0.06	0.04	-0.1	-0.09	0.03	0.19	0.04	-0.01	-0.05	-0.09	0.03	0.01	-0.01	-0.12	0.12	-0.11	-0.04	-0.11	-0.01	0.03	-0.02	-0.12	-0.1	-0.01	0	-0.02	-0.02	0.08	-0.03	-0.06	-0.03	0.07	-0.03	-0.01	-0.02	0.01	-0.07	-0.02	-0.09	0.01	0.07	-0.03	0.12	0.04
AGAP2	0.07	0.11	0.17	0.26	0.01	0.17	-0.25	0.18	0.15	0.05	0.08	0.03	0.27	0.25	0.12	0.29	0.09	0.29	0.18	-0.07	-0.03	0.24	0.24	0.2	0.16	0.18	0.13	0.03	0.2	0.28	0.22	0.24	-0.02	0.23	0.27	0.14	-0.07	-0.02	0.3	0.23	-0.01	0.2	0.34	0.1	0.21	0.07	0.25	0.02	0.11
AGAP3	0.1	-0.03	-0.13	-0.1	-0.1	-0.09	-0.03	-0.07	-0.04	0.01	-0.17	0.06	-0.08	-0.04	-0.02	-0.07	-0.07	-0.1	-0.07	0.02	-0.12	-0.13	-0.04	-0.05	-0.06	-0.13	0.02	-0.04	-0.04	-0.14	-0.05	-0.1	0.17	-0.05	-0.12	-0.05	-0.03	-0.06	-0.06	-0.03	0.1	-0.06	-0.05	-0.07	-0.02	-0.07	-0.01	0.09	-0.12
AGBL2	-0.06	0.03	0.03	0.05	0.09	0.01	-0.01	0.08	0.04	0	0.13	0.11	0.12	0.06	0.02	0.05	0.14	0.11	0.02	-0.04	0.07	0.12	0.09	0.1	0.07	0.1	0.01	-0.03	0.07	0.09	0.01	0.11	-0.03	0.1	0.09	0.11	0.01	-0.07	0.13	0.02	0	0.05	0.13	0.03	0.11	0.06	0.07	-0.17	0.13
AGBL3	0.12	0	0.02	0.03	-0.04	0.09	-0.02	0.12	0.11	0	0.08	-0.03	0.05	0.11	0.03	0.07	-0.02	0.05	0.01	0.01	-0.05	0.05	0.01	0.11	-0.03	0.01	0	-0.04	-0.02	0.09	0.04	0.03	0.01	0.05	0.05	0.12	-0.03	0.01	0.13	0.01	0.04	0.01	0.04	0.03	0.03	0.01	0.09	0.09	0.03
AGBL5	0.04	-0.03	0.09	0.09	-0.03	0.03	-0.09	0.03	0.05	0.01	-0.08	0.02	0.08	0.06	-0.01	0.05	-0.06	0.03	0.04	-0.05	0.07	-0.04	0.08	0.04	-0.01	0.02	0.03	-0.07	0.04	0.06	0	0.03	0.03	0.03	0.01	0.04	-0.01	0.02	0.1	0.05	-0.02	-0.05	0.14	0.09	0.04	-0.1	0.02	-0.03	-0.09
AGER	0.02	-0.02	0.13	0.14	-0.03	0.09	-0.05	0.08	0.09	-0.03	0.08	-0.04	0.15	0.19	0.04	0.17	-0.06	0.17	0.05	-0.07	0.04	0.15	0.1	0.13	0.07	-0.01	0.05	0.04	0.14	0.21	0.13	0.1	0.35	0.17	0.19	0.09	-0.03	-0.04	0.22	0.1	-0.02	0.14	0.19	0.06	0.1	0.09	0.12	-0.07	0.08
AGFG1	-0.1	-0.07	-0.07	-0.05	0.06	-0.02	0.19	-0.11	-0.08	-0.07	-0.01	-0.08	-0.08	-0.08	-0.09	-0.08	-0.02	-0.14	-0.08	-0.04	0.01	-0.16	-0.1	-0.13	-0.07	-0.11	-0.04	-0.07	0.03	-0.03	-0.03	-0.07	-0.12	-0.14	0.02	-0.04	0.06	0.05	-0.16	-0.07	0.08	-0.08	-0.04	-0.04	-0.06	0.05	-0.14	-0.01	0.05
AGFG2	0.02	-0.04	-0.12	-0.07	-0.03	-0.04	0.01	-0.08	-0.05	-0.04	0.07	-0.07	-0.12	-0.03	-0.05	-0.04	-0.06	-0.02	-0.13	0.02	-0.14	-0.08	-0.11	0.01	0.02	-0.15	-0.15	-0.02	-0.08	-0.04	-0.02	-0.07	0.02	-0.05	-0.07	-0.01	0.05	-0.06	-0.01	-0.1	0.09	-0.03	-0.16	-0.06	-0.02	0.03	-0.01	0.08	-0.02
AGGF1	-0.07	0.07	0.12	0.01	-0.01	0.07	-0.13	0.17	0.07	0.04	-0.03	0.03	0.13	0.04	0.07	0.12	0.07	0.12	0.14	-0.09	0.08	0.23	0.1	0.12	0.11	0.09	0.13	0.04	0.06	0.06	0.03	0.07	-0.11	0.13	0.07	0.11	0	-0.12	0.1	0.04	0	0.13	0.14	0.09	0.08	-0.02	0.14	-0.07	-0.05
AGK	-0.07	-0.01	0.03	0.02	-0.12	-0.02	-0.06	0.04	0.03	-0.06	-0.12	-0.04	0	0.15	0.02	0.07	-0.05	0.01	0.03	0.04	-0.04	0.07	0.05	0.02	-0.03	-0.02	0.03	0.06	0.05	-0.03	0.04	0.04	0.13	0.07	0.03	0.09	0.04	-0.08	0.15	0.01	-0.03	0.03	0.08	0.08	0.08	-0.09	0.11	-0.08	-0.05
AGL	-0.16	-0.01	-0.02	0.13	0.12	0.1	0.22	0	0.12	0.04	0.19	0.02	0.15	0.17	0.02	0.11	-0.05	0.14	0	0.19	-0.01	0.05	0.05	0.07	0.04	0.1	-0.03	-0.06	0.03	0.05	-0.01	0.13	0.19	0.11	0.19	0.06	0.03	0	0.26	-0.02	0.02	0.11	0.2	0.15	0.03	-0.04	0.05	-0.11	0.05
AGMAT	-0.15	-0.04	-0.12	0.02	-0.02	-0.01	-0.04	-0.04	-0.03	-0.05	0.15	0.02	-0.01	0.06	-0.04	0.03	0.05	0.11	-0.09	0.24	-0.11	-0.06	-0.05	0.03	0.04	0.02	-0.05	-0.06	0	0.03	0.02	0.01	0.2	0	0.08	0.06	0.03	-0.06	0.16	-0.04	-0.02	0	-0.02	0.01	0.08	0	0.04	-0.07	-0.01
AGO1	-0.01	0.04	0.03	0.08	0.06	0.12	-0.1	0.09	0.09	0.05	0.03	0.04	0.08	0.19	0	0.12	0.04	0.09	0.07	0.07	-0.01	0.1	0.15	0.04	-0.09	0.18	0.07	0.02	0.05	0.06	0	0.09	0.27	0.14	0.08	0.09	0.06	-0.01	0.19	0.03	0.03	0.01	0.12	0.11	0.1	-0.01	0.11	-0.03	-0.02
AGO2	-0.03	0.12	-0.02	0.16	0.04	0.11	0.1	0.03	0.06	0.02	0.15	0.06	0.11	0.14	0.02	0.13	0.02	0.1	0.01	0.17	-0.13	0.11	0.06	0.13	0.07	0.07	-0.04	-0.09	0.13	0.14	0.1	0.09	0.29	0.11	0.11	0.08	0	0	0.17	0.04	0	0.05	0.17	0.07	0.12	0.03	0.05	-0.03	-0.01
AGO3	0	0.05	0.13	0.2	0.11	0.15	0.11	0.07	0.13	0.02	0.05	0.07	0.19	0.2	0.09	0.19	0.05	0.18	0.18	0	0.1	0.09	0.17	0.08	0.03	0.12	0.12	0.05	0.05	0.2	0.04	0.22	-0.03	0.14	0.24	0.05	0.03	0.1	0.15	0.1	-0.04	0.07	0.21	0.21	0.1	0.07	0.14	-0.06	0.13
AGO4	0.03	0.13	0.14	0.13	0.04	0.15	-0.11	0.18	0.21	0.12	0.08	0.05	0.21	0.22	0.06	0.25	0.02	0.11	0.18	0.01	0.12	0.26	0.22	0.2	0.07	0.2	0.13	0.03	0.04	0.16	0.06	0.18	0.07	0.25	0.17	0.17	0.02	0	0.29	0.1	-0.08	0.07	0.21	0.11	0.13	0.06	0.23	-0.08	0.04
AGPAT1	0.07	0	0.05	-0.12	-0.04	-0.05	-0.12	0.02	-0.05	0	-0.25	0.01	-0.15	-0.01	-0.04	-0.02	0.06	-0.06	-0.01	-0.12	0.03	-0.03	0.02	-0.05	-0.03	-0.03	0.07	-0.02	-0.02	-0.1	-0.04	-0.02	0.12	-0.04	-0.08	-0.02	0	0.02	-0.08	-0.01	0.03	-0.08	-0.06	-0.03	-0.05	0	0.06	-0.01	-0.16
AGPAT2	0.02	-0.12	-0.26	-0.16	-0.12	-0.11	0.04	-0.19	-0.15	-0.06	0.04	0.03	-0.18	-0.21	-0.1	-0.24	-0.13	-0.22	-0.21	0.11	-0.08	-0.26	-0.24	-0.08	-0.04	-0.29	-0.19	-0.12	-0.03	-0.17	-0.16	-0.22	0.14	-0.17	-0.19	-0.14	0.05	-0.04	-0.29	-0.17	0.14	-0.1	-0.25	-0.17	-0.11	0.08	-0.26	0.06	-0.08
AGPAT3	-0.06	-0.01	0.01	-0.04	-0.09	0.02	-0.19	0.01	0.1	0	-0.03	0.02	-0.07	-0.09	0.01	0.02	-0.01	-0.09	0.01	-0.04	-0.08	0.06	0	0.05	0.02	0.04	-0.03	0	-0.03	-0.07	0.01	-0.01	0.07	-0.03	-0.07	0	0.04	-0.04	-0.03	-0.08	0.03	-0.02	-0.06	-0.02	-0.04	-0.04	-0.01	-0.08	-0.05
AGPAT4	0.03	-0.04	0.11	0.04	0.05	-0.01	0.02	0.08	0.01	0.04	-0.13	-0.03	0.07	-0.01	0.03	-0.01	0.03	0.01	0.1	-0.17	0.14	0.04	0.1	-0.06	-0.04	0.05	0.1	-0.01	-0.01	0.06	-0.04	0.06	-0.23	0.01	0.01	-0.11	-0.01	0.01	-0.07	0.04	0.01	-0.02	0.06	0.03	-0.02	-0.04	-0.04	-0.1	0.09
AGPAT4-IT1	0	0.01	0.19	0.15	0.02	0.08	-0.03	0.12	0.07	0.06	-0.08	0.01	0.17	0.13	0.1	0.13	0.01	0.12	0.14	-0.19	0.15	0.1	0.2	0.04	0.03	0.05	0.16	0.03	0.05	0.16	0.04	0.13	-0.13	0.1	0.11	-0.02	-0.03	-0.03	0.14	0.09	0.01	0.09	0.17	0.09	0.02	0	0.07	-0.13	0.13
AGPAT5	-0.01	0.15	0.18	0.36	0.02	0.22	-0.09	0.23	0.25	0.02	-0.02	-0.01	0.38	0.37	0.13	0.36	0.08	0.34	0.32	-0.03	0.1	0.28	0.39	0.27	0.14	0.24	0.21	0.03	0.17	0.29	0.26	0.34	0.21	0.39	0.3	0.23	-0.17	0.05	0.45	0.26	-0.02	0.15	0.47	0.2	0.21	-0.06	0.31	-0.08	0.14
AGPAT6	0.05	0.05	0.06	0.01	-0.04	0.03	0.08	0.02	0.07	-0.02	-0.17	-0.03	0.02	0.02	-0.04	0.09	0.07	0	0.09	-0.04	-0.05	0.06	0.11	0.01	0.02	0.04	0.11	0.02	0.03	0.01	0.08	0.03	0.1	0.08	-0.03	0.11	-0.12	0.01	0.08	0.05	0.03	0	0.03	-0.01	0.07	0.03	0.15	-0.03	-0.02
AGPAT9	-0.1	-0.15	-0.26	-0.26	-0.07	-0.23	0.21	-0.25	-0.25	-0.06	-0.13	-0.06	-0.36	-0.28	-0.2	-0.39	-0.02	-0.3	-0.29	0.02	-0.09	-0.38	-0.37	-0.29	-0.1	-0.35	-0.22	-0.14	-0.08	-0.24	-0.22	-0.29	0.04	-0.35	-0.31	-0.2	0.05	0.14	-0.39	-0.32	0.08	-0.13	-0.36	-0.17	-0.23	0.08	-0.37	-0.01	-0.1
AGPHD1	-0.03	-0.02	-0.17	-0.08	0.05	-0.03	0.13	-0.14	-0.15	-0.09	0.01	0.01	-0.12	-0.02	-0.08	-0.07	-0.09	-0.07	-0.12	0.14	-0.12	-0.07	-0.12	-0.01	-0.07	-0.09	-0.08	-0.09	0.07	-0.13	-0.01	-0.1	0.02	-0.11	-0.05	-0.06	0.04	-0.04	-0.07	-0.07	-0.05	-0.04	-0.03	-0.01	-0.05	-0.06	-0.04	-0.06	-0.1
AGPS	-0.06	-0.08	-0.07	0.04	0.01	-0.04	0.05	0.02	-0.02	0.01	-0.14	-0.01	0.02	0.06	-0.05	-0.01	0.05	-0.07	0.01	-0.1	0.08	-0.07	0.04	-0.02	-0.07	-0.12	0.01	-0.1	0.04	0.06	-0.04	-0.03	-0.04	0.01	0.03	-0.09	-0.01	0.01	-0.04	-0.04	0.03	0.01	0.05	0.01	-0.02	0.03	-0.09	-0.1	0.01
AGR2	-0.06	-0.07	-0.27	-0.14	0.08	-0.08	0.29	-0.13	-0.11	-0.05	0.3	0	-0.12	-0.11	-0.08	-0.15	-0.06	-0.06	-0.27	0.3	-0.2	-0.11	-0.28	-0.05	-0.04	-0.11	-0.24	-0.09	-0.09	-0.18	-0.1	-0.17	0.07	-0.11	-0.13	-0.1	0.07	0	-0.08	-0.19	0.02	-0.1	-0.23	-0.03	-0.07	0.02	-0.16	0.06	0.01
AGR3	-0.06	-0.02	-0.15	-0.07	0.03	0	0.13	-0.06	-0.09	-0.08	0.16	-0.02	-0.01	-0.04	-0.08	-0.03	-0.1	0	-0.13	0.24	-0.18	-0.04	-0.09	0.05	0.01	-0.02	-0.1	-0.12	0	-0.08	-0.07	0	0.18	0.02	-0.04	-0.02	-0.02	-0.09	0.04	-0.06	0.05	-0.09	-0.01	0	-0.07	-0.04	-0.03	-0.05	-0.01
AGRN	-0.04	-0.19	-0.21	-0.27	0.03	-0.2	0.18	-0.27	-0.24	-0.04	0.16	-0.01	-0.26	-0.3	-0.09	-0.36	-0.17	-0.31	-0.3	0.1	-0.12	-0.32	-0.39	-0.15	-0.11	-0.34	-0.31	-0.06	-0.14	-0.22	-0.21	-0.31	-0.02	-0.29	-0.23	-0.26	0.06	-0.05	-0.42	-0.32	0.08	-0.19	-0.42	-0.19	-0.2	0.04	-0.39	-0.01	0.02
AGRP	0.09	0.03	0.04	0.1	0.01	0.13	0.03	0.02	0.11	-0.04	0.13	0	0.11	0.17	0.04	0.15	0.01	0.16	0.04	0.03	0.02	0.07	0.05	0.07	0.05	0.07	0.02	0.08	0.05	0.15	0.12	0.09	0.04	0.07	0.11	0.05	0.06	0.03	0.17	0.09	0.05	0.19	0.14	0.04	0.09	0.05	0.12	0.09	0.06
AGT	0.1	-0.03	-0.02	-0.08	-0.02	-0.01	0.06	0.05	0.03	-0.01	-0.09	0.01	-0.08	-0.08	-0.05	-0.04	0.04	-0.12	0.02	-0.03	-0.06	-0.01	0.01	-0.02	0.02	-0.01	0.06	-0.01	-0.01	-0.1	-0.05	0	0.02	-0.08	-0.04	-0.02	0.02	0.03	-0.08	-0.03	-0.02	-0.01	-0.05	-0.02	-0.02	0.05	-0.01	-0.01	-0.13
AGTPBP1	-0.01	0.13	0.22	0.25	0.04	0.15	-0.04	0.23	0.26	0.03	0.01	-0.01	0.26	0.28	0.13	0.27	0.08	0.25	0.22	-0.04	0.14	0.2	0.24	0.21	0.11	0.07	0.12	0.03	0.18	0.24	0.14	0.25	0.05	0.24	0.27	0.19	-0.05	0	0.36	0.16	-0.03	0.17	0.35	0.15	0.17	0	0.25	-0.04	0.08
AGTR1	-0.02	-0.06	0.07	-0.04	0.01	0.02	-0.13	-0.03	-0.01	0	-0.17	-0.02	0	-0.02	-0.04	-0.01	0.06	0.02	0.04	-0.13	0.01	-0.02	0.08	-0.07	0.01	0.11	0.16	0.06	-0.05	0.02	0.05	0.06	-0.08	-0.03	0	0.04	0	-0.12	-0.02	0.08	0.01	0.06	0	-0.06	-0.02	0.01	0.1	-0.21	0
AGTR2	-0.01	0.07	0.14	0.15	-0.03	0.16	-0.02	0.13	0.13	0	0.07	-0.02	0.18	0.26	0.04	0.21	-0.04	0.31	0.1	-0.1	0.12	0.1	0.13	0.13	0.09	0.01	0.05	0.07	0.11	0.2	0.16	0.16	0.01	0.17	0.23	0.09	-0.05	-0.13	0.26	0.17	0	0.15	0.22	0.06	0.1	-0.04	0.12	-0.09	0.09
AGTRAP	-0.01	-0.1	-0.19	-0.15	-0.07	-0.16	0.07	-0.21	-0.2	-0.03	-0.02	0.04	-0.16	-0.14	-0.01	-0.18	-0.1	-0.2	-0.17	-0.03	0.06	-0.21	-0.21	-0.12	-0.11	-0.18	-0.12	-0.01	-0.02	-0.14	-0.16	-0.2	0	-0.16	-0.18	-0.16	0.08	0.01	-0.27	-0.24	0.05	-0.04	-0.18	-0.06	-0.11	0.09	-0.24	-0.03	-0.02
AGXT	-0.03	0.02	0.05	0.11	-0.04	0.09	-0.13	0.01	0.04	0.01	0.08	-0.03	0.13	0.18	-0.02	0.14	-0.07	0.25	0.06	0.03	-0.03	0.03	0.05	0.1	0.03	0.03	0.01	0.04	0.08	0.11	0.11	0.07	-0.06	0.11	0.11	0.09	-0.09	-0.07	0.18	0.1	0.05	0.05	0.17	0.02	0.09	-0.02	0.13	0.01	-0.02
AGXT2	-0.06	0.04	0.05	0.08	0.03	0.12	-0.08	0.1	0.03	-0.01	0.03	0.03	0.08	0.17	0.04	0.08	-0.02	0.13	-0.01	-0.04	-0.06	0	0	0.01	0.04	0.01	-0.06	0.03	0.09	0.08	0.08	0.11	-0.07	0.03	0.07	0.05	-0.03	0.01	0.19	0.05	0.01	0.13	0.1	0.03	-0.01	0.01	0.06	-0.01	0.01
AGXT2L1	0.01	0.07	0	0.09	0.03	0.08	-0.1	0.06	0.05	0.05	-0.03	-0.04	0.03	0.17	0.04	0.12	0.03	0.04	0	0.04	-0.07	0.09	0.06	0.05	0.08	0	-0.01	-0.01	0.08	0.02	0.07	0.07	0.04	0.07	0.09	0.06	-0.06	-0.07	0.15	0.07	0.03	0.05	0.14	0.06	0.07	0	0.09	-0.16	-0.05
AGXT2L2	-0.07	0.01	0.09	0.13	0.01	0.07	-0.01	0.08	0.05	-0.06	0.1	0.03	0.15	0.09	0.06	0.12	-0.04	0.15	0.07	-0.07	0.08	0.09	0.06	0.19	0.12	0.07	0.08	0	0.06	0.22	0.1	0.08	0.01	0.13	0.18	0.06	0	0.05	0.08	0.07	0.01	0.12	0.15	0.04	0.11	0.03	0.11	-0.04	0.1
AHCTF1	0.03	0.1	-0.02	0.18	0.04	0.09	0.05	0.03	0	0.05	0.02	0.02	0.14	0.17	0.04	0.11	0.05	0.09	0.04	0.1	-0.06	0.1	0.09	0.08	0.08	0	-0.02	0.01	0.06	0.05	0.12	0.11	0.09	0.1	0.14	0.07	-0.09	-0.02	0.24	0.07	0.02	0.06	0.22	0.1	0.03	-0.02	0.05	0.06	0.09
AHCY	-0.03	-0.02	-0.06	0.04	-0.02	0.04	-0.01	-0.04	-0.09	-0.02	0.07	-0.07	0.02	0.06	-0.05	-0.01	-0.15	0.05	-0.09	0.12	-0.05	-0.08	-0.08	0.1	-0.02	-0.11	-0.09	-0.09	0.08	0	0.04	-0.05	0.33	-0.01	0.01	-0.04	-0.02	-0.02	0.09	-0.05	0.05	-0.07	0.09	0.06	0.05	-0.13	-0.09	-0.02	-0.03
AHCYL1	-0.1	-0.07	-0.1	-0.05	0.07	-0.08	0.12	-0.07	-0.04	-0.01	-0.11	0.01	-0.11	-0.11	0.01	-0.1	-0.08	-0.25	-0.1	0.01	-0.1	-0.16	-0.08	-0.07	-0.03	-0.07	-0.04	-0.05	-0.01	-0.11	-0.14	-0.03	0.02	-0.17	0	-0.12	0.06	-0.06	-0.12	-0.15	0.05	-0.05	-0.1	0.02	-0.19	-0.03	-0.16	-0.18	-0.11
AHCYL2	0	0.03	-0.01	-0.01	-0.07	0.04	0.02	0.06	0.07	0	-0.03	0.05	0	0.07	0.02	0.06	0	0.04	0.03	0.11	0.05	0.05	0.04	0.05	0	0.05	-0.01	0.02	0.03	-0.02	0.04	0.03	0.07	0.08	0.04	0.08	0.17	0.02	0.08	-0.02	0	0.03	0	0.09	0.08	0.05	0.08	0.07	0.02
AHDC1	0.09	0.01	0.08	-0.05	0.02	-0.04	-0.04	0.01	0.05	0.06	-0.04	-0.01	0.04	-0.07	0.03	0.05	-0.02	-0.03	0.08	-0.1	-0.02	0.02	0.06	-0.02	-0.04	0.01	0.08	0.12	-0.14	0.03	-0.06	-0.03	0.1	0.03	-0.03	-0.05	0.05	0	-0.06	0.01	-0.06	-0.02	-0.07	0	0.05	0.04	0.02	0.03	0.04
AHI1	-0.09	0.04	-0.02	0.07	0.14	0.02	0.13	-0.04	0.07	0.03	-0.14	0.04	0.05	0.04	0.04	0.05	0	0.08	0.11	-0.08	0	-0.06	0.13	0	0.01	0.01	0.07	0	0.03	-0.01	0.04	0.11	0.03	0.03	0.05	0.01	0	0.01	0.02	0.08	0.02	0.01	0.1	0.06	0.01	-0.03	0.06	-0.18	0.01
AHNAK	-0.06	-0.16	-0.13	-0.27	0.02	-0.17	0.14	-0.27	-0.28	-0.04	0.04	0.04	-0.3	-0.37	-0.11	-0.35	-0.1	-0.27	-0.26	-0.06	-0.01	-0.24	-0.33	-0.24	-0.08	-0.2	-0.14	-0.04	-0.13	-0.21	-0.19	-0.26	-0.09	-0.34	-0.28	-0.29	0.08	0.04	-0.44	-0.24	0.02	-0.14	-0.38	-0.22	-0.15	0	-0.31	0.02	-0.03
AHNAK2	0	-0.15	-0.16	-0.28	0.02	-0.23	0.21	-0.22	-0.24	-0.02	-0.03	-0.03	-0.26	-0.38	-0.11	-0.45	-0.1	-0.3	-0.28	-0.1	0.1	-0.32	-0.35	-0.27	-0.16	-0.27	-0.21	-0.02	-0.17	-0.26	-0.22	-0.31	-0.31	-0.33	-0.32	-0.35	0.07	0.07	-0.5	-0.25	0.08	-0.13	-0.42	-0.17	-0.26	0	-0.41	0.06	0.06
AHR	-0.04	-0.11	-0.24	-0.24	0.06	-0.19	0.24	-0.2	-0.15	-0.03	0.12	0	-0.24	-0.26	-0.09	-0.3	0.01	-0.23	-0.25	0.15	-0.13	-0.29	-0.31	-0.22	-0.15	-0.16	-0.15	-0.06	-0.19	-0.21	-0.17	-0.27	0.06	-0.24	-0.27	-0.19	0.07	0.08	-0.38	-0.26	0.04	-0.16	-0.37	-0.16	-0.17	0.07	-0.28	0.03	0.02
AHRR	0.02	0.02	0.02	-0.05	0	-0.06	0.03	0.01	0.04	0.02	-0.2	-0.01	-0.04	-0.01	0.01	-0.01	0.04	0	0.14	-0.2	0.04	-0.01	0.09	-0.09	-0.07	0.1	0.13	0.02	-0.06	-0.02	-0.04	0	0.04	0	-0.08	0.02	-0.05	0.05	-0.08	0.01	-0.05	0.02	-0.04	-0.05	-0.02	0.03	0.08	-0.05	-0.07
AHSA1	-0.03	0.07	-0.02	0.15	0.03	0.07	0.01	0.02	0	0.01	0.07	0.02	0.12	0.21	0.01	0.07	0.04	0.16	0	0.14	0.06	0.02	0.01	0	0	-0.04	-0.11	0.03	0.1	0.07	0.09	0.08	0.1	0.09	0.12	0.03	-0.07	0.03	0.17	0.09	0.06	0.04	0.17	0.04	0.05	-0.02	0.02	0.07	0.05
AHSA2	-0.12	0.04	0.07	0.14	0.06	0.14	0.01	0.14	0.15	0.04	0.13	0.07	0.14	0.15	0.04	0.15	0.01	0.2	0.1	-0.08	0.09	0.15	0.08	0.18	0.09	0.05	0.03	0.01	0.04	0.19	0.06	0.1	0.22	0.15	0.14	0.11	0	-0.07	0.22	0.07	0.01	0.16	0.17	0.09	0.06	0	0.13	-0.18	0.07
AHSG	0.02	0.04	0.03	0.07	-0.01	0.05	-0.05	0.09	0.05	-0.02	0.11	0.05	0.05	0.1	0.02	0.07	-0.06	0.1	-0.05	0.08	-0.03	0.04	0	0.1	0.09	-0.02	-0.03	-0.03	0.02	0.05	0.1	0.06	-0.08	0.04	0.1	0.07	-0.02	0.07	0.11	-0.02	0.04	0.02	0.06	0.09	0.07	0	0.07	0.12	0.02
AHSP	0.02	0.02	0.01	0.02	-0.02	0.08	-0.05	-0.07	-0.03	0	0.05	-0.03	0.01	0.04	-0.06	0.04	0.03	0.06	-0.05	0.01	-0.04	-0.04	-0.05	0	0.02	-0.02	-0.07	-0.02	0.07	0.03	0.08	0.03	-0.1	-0.04	0	-0.04	0.03	0.04	0.06	0	0.06	0	0.04	-0.05	-0.01	0.01	-0.01	0.09	-0.01
AICDA	0.01	0.07	0.2	0.07	-0.03	0.12	-0.1	0.15	0.07	-0.01	0.09	0.03	0.08	0.21	0.01	0.12	0.07	0.23	0.09	-0.08	0.01	0.11	0.04	0.08	0.12	0.1	0.04	0.1	0.06	0.17	0.12	0.08	-0.03	0.06	0.12	0.06	-0.02	0.01	0.23	0.07	-0.02	0.12	0.12	0.04	0.11	0.02	0.11	0.01	0.07
AIF1	0.1	0.1	0.16	0.23	-0.07	0.17	-0.19	0.2	0.15	0.04	0.07	-0.04	0.22	0.25	0.11	0.26	0.04	0.24	0.14	-0.06	0.03	0.13	0.17	0.17	0.14	0.11	0.02	0.06	0.17	0.27	0.21	0.21	0.1	0.2	0.21	0.12	0.02	0.02	0.29	0.15	0	0.18	0.28	0.06	0.1	0.13	0.18	0.06	0.05
AIF1L	0.05	-0.04	-0.18	-0.16	-0.04	-0.11	0.07	-0.16	-0.09	-0.09	0.12	-0.01	-0.17	-0.11	-0.06	-0.15	-0.08	-0.24	-0.22	0.29	-0.15	-0.22	-0.23	-0.07	-0.09	-0.22	-0.27	-0.12	-0.05	-0.24	-0.15	-0.15	-0.04	-0.15	-0.17	-0.11	0.04	-0.06	-0.14	-0.17	0.07	-0.13	-0.17	-0.08	-0.08	0.03	-0.2	0	-0.11
AIFM1	-0.13	0.04	0.03	0.13	-0.07	0.1	-0.11	0.07	0.02	-0.04	-0.04	-0.01	0.1	0.22	0.04	0.14	-0.03	0.11	0.07	0.02	0.07	0.05	0.08	0.08	0.06	0.06	-0.06	0.04	0.18	0.06	0.14	0.11	0.28	0.05	0.17	0.08	0.05	-0.06	0.22	0.01	0.05	0.05	0.2	0.15	0.1	0.02	0.06	-0.13	-0.08
AIFM2	-0.02	-0.12	-0.4	-0.17	-0.02	-0.19	0.1	-0.28	-0.18	-0.1	-0.05	-0.03	-0.28	-0.21	-0.17	-0.28	-0.07	-0.23	-0.22	0.04	-0.12	-0.31	-0.29	-0.14	-0.08	-0.23	-0.16	-0.12	-0.04	-0.17	-0.13	-0.22	-0.18	-0.27	-0.13	-0.1	0.03	0.08	-0.33	-0.19	0.08	-0.13	-0.24	-0.14	-0.16	0.02	-0.23	0.06	-0.08
AIFM3	-0.02	-0.02	-0.03	0.08	-0.01	0.01	-0.05	0.03	0.01	0.03	0.23	0.06	0.08	0.14	0.01	0.08	-0.03	0.08	-0.08	0.16	-0.09	0.08	-0.04	0.11	-0.02	-0.06	-0.12	-0.01	0	0.05	-0.03	-0.03	0.05	0.1	0.04	0.05	0.04	-0.05	0.15	-0.05	-0.03	0.04	0.03	0.04	0.09	0.01	0	-0.03	0.05
AIG1	0.09	-0.04	-0.1	-0.12	0.09	-0.12	0.14	-0.18	-0.15	0	0.13	0.07	-0.09	-0.25	-0.02	-0.18	-0.06	-0.15	-0.2	0.11	0.01	-0.16	-0.17	-0.05	-0.03	-0.13	-0.13	-0.1	-0.06	-0.15	-0.15	-0.09	-0.2	-0.12	-0.1	-0.16	0.13	0.06	-0.23	-0.22	0.05	-0.12	-0.17	-0.09	-0.1	0.05	-0.23	0.04	0.03
AIM1	-0.05	-0.03	-0.09	0.02	0	0.02	-0.03	-0.05	-0.05	0.03	0.25	0.05	0.03	-0.02	0.01	-0.01	0.04	0.04	-0.07	0.09	-0.05	-0.06	-0.12	-0.05	0.06	-0.08	-0.11	0.09	-0.08	0	-0.03	-0.06	-0.07	0.02	-0.03	-0.05	0.03	-0.04	-0.06	-0.06	0.01	0	-0.08	-0.05	-0.03	0.07	-0.07	-0.04	0.12
AIM1L	-0.02	-0.02	-0.2	-0.06	0.08	-0.01	0.19	-0.08	-0.05	-0.03	0.31	0.02	-0.05	0.01	-0.08	-0.06	-0.09	0.01	-0.21	0.24	-0.16	-0.12	-0.21	-0.01	-0.06	-0.17	-0.22	-0.06	-0.03	-0.06	-0.06	-0.11	0	-0.08	-0.03	-0.1	0.03	0.03	0.02	-0.14	0	-0.06	-0.11	-0.07	-0.02	0.04	-0.11	0.07	0.02
AIM2	-0.06	0.01	0.07	0.12	-0.1	0.12	-0.16	0.11	0.05	0.04	0.05	0.05	0.08	0.23	0.07	0.18	0.12	0.24	0.01	-0.08	0.06	0.09	0.01	-0.01	0.06	-0.04	0	0.1	0.05	0.16	0.12	0.08	0.06	0.03	0.11	0.08	-0.05	0.01	0.21	0.13	0	0.13	0.11	0.05	0.08	0.04	0.09	0.04	0.09
AIMP1	-0.02	0.09	0.03	0.15	-0.02	0.1	-0.11	0.09	0.08	0.01	0.05	-0.02	0.12	0.14	0.02	0.14	0.04	0.11	0.13	0.04	-0.05	0.12	0.13	0.16	0.11	0.11	0.08	-0.05	0.03	0.14	0.06	0.13	0.18	0.15	0.14	0.16	-0.11	0.02	0.18	0.1	-0.05	0.06	0.18	0.04	0.14	-0.04	0.17	-0.06	0
AIMP2	0	0.03	-0.09	-0.02	-0.02	-0.02	0.04	-0.05	-0.07	-0.03	0.09	0.03	-0.01	0.1	0.01	-0.08	-0.03	-0.03	-0.03	0.02	-0.04	-0.1	-0.03	0	-0.08	-0.05	-0.11	0.01	-0.03	-0.03	0.04	-0.07	-0.11	-0.05	-0.01	0.02	-0.01	0.05	-0.04	-0.11	0.02	0	0.01	0.01	-0.01	-0.05	-0.04	0.11	-0.05
AIP	0.02	0.04	0.19	0.19	0	0.12	-0.18	0.17	0.08	0.03	0	0.03	0.19	0.16	0.11	0.18	0.01	0.25	0.12	-0.14	0.12	0.15	0.16	0.12	0.1	0.13	0.09	0.06	0.13	0.23	0.14	0.15	0.1	0.18	0.18	0.14	-0.11	0	0.22	0.21	-0.04	0.06	0.23	0.07	0.12	-0.02	0.19	0.03	0.02
AIPL1	0	0.03	0.03	0.05	0.02	0.09	-0.06	0.04	0.03	0.02	0.09	0.02	0.06	0.14	-0.02	0.11	0.04	0.13	-0.01	-0.04	-0.07	0.08	0	0.02	0.12	-0.06	-0.02	0.08	0.09	0.09	0.13	0.09	-0.21	0.05	0.08	0.03	-0.1	-0.03	0.15	0.1	0.06	0.1	0.12	-0.03	0.04	0.06	0.11	0.02	0.03
AIRE	0.06	0.08	0.11	0.15	-0.06	0.13	-0.12	0.09	0.01	-0.01	0.04	-0.02	0.16	0.19	0.06	0.15	0.01	0.14	0.09	-0.07	0.02	0.1	0.1	0.13	0.09	0.09	0.04	0.05	0.12	0.12	0.1	0.12	-0.14	0.14	0.14	0.06	-0.01	-0.01	0.13	0.15	0.03	0.11	0.16	0.02	0.09	0.03	0.1	0.1	0.07
AJAP1	0.01	0.07	0.12	0.07	-0.09	0.05	-0.15	0.03	0.02	0.03	0.01	-0.02	0.11	0.13	0.02	0.11	-0.03	0.12	0.07	-0.1	-0.01	0.06	0.04	-0.01	0.03	0.04	0.09	0.1	0.05	0.14	0.12	0.08	-0.34	0.03	0.08	-0.02	0	0	0.07	0.17	0.01	0.04	0.12	-0.03	0.03	-0.02	0.08	0.06	0.06
AJUBA	0.05	-0.18	-0.2	-0.25	0.08	-0.25	0.28	-0.3	-0.24	-0.04	0.06	-0.04	-0.27	-0.38	-0.12	-0.47	-0.13	-0.33	-0.26	0.06	-0.01	-0.35	-0.33	-0.23	-0.13	-0.25	-0.22	-0.09	-0.12	-0.23	-0.25	-0.27	-0.28	-0.32	-0.26	-0.29	0.1	0.01	-0.51	-0.3	0.06	-0.19	-0.39	-0.19	-0.24	0.02	-0.44	0.06	0.03
AK1	-0.06	-0.1	-0.18	-0.17	-0.04	-0.19	0.17	-0.11	-0.17	0	-0.19	-0.01	-0.22	-0.28	-0.13	-0.27	-0.07	-0.21	-0.12	0.02	-0.07	-0.2	-0.17	-0.16	-0.12	-0.18	-0.04	-0.07	-0.17	-0.25	-0.14	-0.17	-0.05	-0.19	-0.26	-0.13	0.03	0.01	-0.27	-0.12	0.03	-0.1	-0.26	-0.11	-0.17	-0.07	-0.15	0.06	-0.09
AK2	0.03	0.09	0.17	0.25	-0.07	0.14	-0.27	0.16	0.08	0.04	-0.07	0	0.23	0.26	0.12	0.27	0.09	0.18	0.18	-0.18	0.19	0.2	0.21	0.17	0.13	0.12	0.11	0.04	0.23	0.27	0.13	0.18	0.21	0.21	0.24	0.13	0.02	0	0.22	0.14	0.02	0.13	0.31	0.09	0.19	0.11	0.14	-0.05	0.07
AK3	-0.12	0	0.02	0.11	0.03	0.04	0	0.07	0.07	-0.05	0.04	0.03	0.11	0.08	0.01	0.09	0.04	0.08	0.05	0.07	0.01	0.05	0.09	0.1	0.04	0.06	0.11	-0.02	-0.01	0.08	0.06	0.08	0.13	0.14	0.1	0.13	-0.08	-0.22	0.08	0.06	-0.02	0.02	0.07	0.04	0.06	-0.06	0.13	-0.19	0.08
AK4	-0.07	-0.1	-0.02	-0.12	0	-0.07	-0.01	-0.07	-0.12	-0.02	-0.03	0.07	-0.13	-0.17	-0.01	-0.19	-0.09	-0.1	-0.21	-0.03	-0.01	-0.09	-0.14	-0.14	0.02	-0.13	-0.12	-0.02	-0.05	-0.15	-0.15	-0.1	-0.09	-0.17	-0.15	-0.18	-0.04	0.02	-0.19	-0.09	0.06	-0.08	-0.19	-0.09	-0.15	-0.06	-0.18	0.01	-0.04
AK5	0.04	-0.04	0.12	-0.12	-0.01	-0.02	-0.03	0.02	-0.03	-0.03	-0.33	-0.05	-0.08	-0.17	-0.02	-0.13	-0.04	-0.12	0.06	-0.21	-0.03	-0.11	0	-0.15	-0.05	-0.05	0.1	0.06	-0.1	-0.12	-0.04	0.01	-0.08	-0.13	-0.15	-0.08	-0.04	-0.08	-0.18	0.02	0.03	-0.04	-0.1	-0.07	-0.1	-0.08	0.05	-0.03	-0.14
AK7	-0.15	0.02	-0.04	0.07	0.06	0.09	0.11	0.08	0.04	-0.03	0.12	0.01	0.1	0.13	-0.01	0.11	0.05	0.08	-0.06	0.15	-0.03	0.04	-0.01	0.07	0.03	0.01	-0.08	-0.08	0.08	0.01	0.03	0.03	-0.13	0.07	0.09	0.03	-0.02	-0.01	0.24	0.01	0.02	0.01	0.15	0.07	0.12	0	0.02	-0.05	0.01
AK8	0.05	-0.03	-0.08	-0.06	-0.04	0	-0.01	-0.05	-0.05	-0.01	0.14	0.04	0	-0.04	-0.05	-0.06	-0.06	-0.04	-0.12	0.06	-0.07	-0.08	-0.09	0.01	-0.03	-0.03	-0.16	-0.05	-0.01	-0.08	-0.03	-0.04	0	-0.03	-0.03	-0.12	0.01	0	-0.04	-0.09	0.01	-0.05	-0.06	-0.04	-0.01	0.02	-0.08	0.01	0.01
AK9	0.07	0.14	0.05	0.1	0.01	0.1	-0.04	0.15	0.16	0.08	0.12	0.05	0.1	0.13	0.05	0.23	0.05	0.15	0.11	0.07	0	0.17	0.14	0.16	0.09	0.17	0.05	-0.01	0.06	0.07	0.03	0.1	-0.08	0.21	0.12	0.16	0.1	0.11	0.3	0.06	0.05	0.07	0.17	0.09	0.11	-0.03	0.18	0.09	-0.05
AKAP1	-0.07	0.07	-0.08	0.12	-0.06	0.12	-0.11	0.1	0.09	0.05	0.22	0.01	0.13	0.13	-0.02	0.18	0.01	0.15	-0.03	0.25	-0.17	0.11	0.01	0.16	0.07	-0.02	-0.08	-0.06	0.06	0.05	0.08	0.02	0.13	0.18	0.06	0.13	0.02	-0.01	0.35	0.03	0.01	0.02	0.17	0.06	0.12	-0.05	0.12	0.04	0.01
AKAP10	-0.05	0.07	0.03	0.18	0.05	0.1	0.11	0.06	0.05	-0.02	0.04	-0.02	0.16	0.1	0.11	0.13	-0.04	0.15	0.14	-0.12	0.17	0.13	0.12	0.14	0.13	0.09	0.06	0.04	0.1	0.17	0.05	0.07	0.19	0.15	0.14	0.05	-0.06	-0.02	0.15	0.09	0.02	0.11	0.18	0.08	0.04	0.03	0.03	-0.05	0.11
AKAP11	-0.12	0.01	0.05	0.12	0.02	0.09	-0.01	0.1	0.05	0.06	-0.02	-0.02	0.1	0.16	0.05	0.1	0.04	0.19	0.15	-0.1	0.06	0.1	0.1	0.13	-0.03	0.03	0.07	0.1	-0.13	0.12	0.05	0.07	0.22	0.17	0.04	0.11	-0.04	-0.07	0.16	0.12	-0.03	0.09	0.07	0.01	0.06	-0.09	0.16	-0.17	0.06
AKAP12	0.03	-0.11	-0.06	-0.16	0.04	-0.14	0.17	-0.11	-0.16	-0.03	-0.23	-0.05	-0.18	-0.18	-0.08	-0.26	-0.06	-0.18	-0.14	-0.08	0.01	-0.2	-0.15	-0.16	-0.12	-0.16	-0.08	-0.03	-0.14	-0.19	-0.11	-0.13	-0.25	-0.2	-0.2	-0.18	-0.07	-0.04	-0.26	-0.07	0.06	-0.12	-0.25	-0.11	-0.17	-0.04	-0.18	-0.03	0.01
AKAP13	-0.15	-0.03	0.05	0.04	0.07	0.07	0.06	0.05	0.02	-0.02	0.15	-0.01	0.1	0.13	0.04	0.08	-0.04	0.16	0.08	-0.08	0.04	0.13	0	0.09	0.02	0.06	0.01	0.08	-0.03	0.21	0.13	0.05	0.19	0.07	0.1	0.02	-0.12	-0.14	0.13	0.04	-0.06	0.11	0.09	0.05	0.06	0.01	0.06	-0.16	0.13
AKAP14	0.02	0.06	0.05	0.08	-0.04	0.06	-0.15	0.07	0.01	-0.03	-0.01	-0.04	0.1	0.19	-0.06	0.09	-0.03	0.19	0.06	-0.09	0	0.09	0.06	0.11	-0.01	0.11	0.08	-0.02	0.02	0.09	0.04	0.07	0.08	0.08	0.04	0.09	-0.03	0.1	0.15	0.05	-0.04	0.01	0.12	-0.01	0.09	-0.02	0.16	0.04	0.05
AKAP17A	-0.05	0.14	0.16	0.22	-0.06	0.12	-0.3	0.13	0.23	0.05	0.02	0.04	0.22	0.25	0.08	0.25	0.04	0.26	0.24	-0.11	0.13	0.26	0.23	0.19	0.1	0.17	0.15	0.08	0.1	0.22	0.14	0.18	0.05	0.23	0.22	0.2	-0.07	-0.13	0.28	0.18	-0.03	0.13	0.28	0.14	0.13	-0.03	0.23	0.01	0.03
AKAP3	0.08	0.12	0.13	0.1	0	0.11	-0.08	0.06	0.11	-0.05	0.01	-0.03	0.14	0.15	0.11	0.14	-0.01	0.13	0.02	0.01	0.07	0.11	0.08	0.1	0.06	0.05	0	0.08	0.15	0.11	0.06	0.09	0.11	0.11	0.16	0.1	0.09	0.13	0.19	0.07	0.03	0.16	0.12	0.09	0.12	0.04	0.12	0.12	0.07
AKAP4	0.07	0	0.01	0.07	-0.02	0.08	-0.04	0.01	0.03	-0.01	0.04	-0.01	0.06	0.16	0.02	0.06	-0.01	0.09	0.01	-0.07	-0.07	0.07	0.04	0.08	0.05	0.01	-0.03	0.02	0.04	0.1	0.06	0.08	-0.13	0.07	0.09	0.02	-0.03	-0.05	0.08	0.03	0	0.08	0.07	-0.05	0.02	0.1	0.06	0.07	0.04
AKAP5	-0.02	0.11	0.15	0.07	0.09	0.08	0.08	0.02	0.09	0.09	-0.03	-0.03	0.09	0.01	-0.06	0.04	0.02	0.03	0.03	0.09	-0.11	0.15	0.1	0.04	0.07	0.14	0.01	-0.02	0.05	-0.02	0.03	0.08	0.02	0.08	0.11	0.03	-0.03	0.03	0.17	0.09	-0.03	0.02	0.09	0.01	0.06	-0.03	0.08	0.08	0.03
AKAP6	0.08	0.08	-0.02	0.03	0.08	0.09	0.07	0.09	0.05	0.03	-0.03	0.01	0.06	0.07	0	0.05	0.06	0.08	-0.01	-0.04	0.01	0.1	0.03	-0.02	0.08	0.01	-0.01	0	0.06	-0.02	0.04	0.1	0.02	0.07	0.06	0.08	0.05	-0.02	0.05	0.09	0.01	0.09	0.09	0.06	0.03	-0.03	0.11	0.03	-0.05
AKAP7	0.02	-0.01	0.05	0.02	-0.02	0.04	-0.06	0.02	0	-0.01	-0.15	-0.04	0.01	0.13	0.03	-0.02	0	0.06	0.1	-0.12	0.1	0.02	0.07	0.01	-0.01	0.11	0.05	-0.03	0.06	0.04	0.03	0.04	-0.07	-0.01	0.02	0.01	-0.02	0.03	-0.05	0	-0.01	0.04	0.04	-0.04	-0.09	0.02	-0.01	-0.08	0.03
AKAP8	-0.04	0.11	0.07	0.27	-0.08	0.17	-0.24	0.15	0.07	-0.02	0.03	-0.02	0.21	0.28	0.11	0.22	0.06	0.26	0.17	0	0.08	0.19	0.2	0.23	0.05	0.06	0.08	0.03	0.21	0.29	0.19	0.17	0.24	0.28	0.26	0.2	-0.06	-0.05	0.25	0.17	0.01	0.12	0.32	0.07	0.11	0.1	0.22	-0.05	0.1
AKAP8L	0.02	0.09	0.2	0.24	-0.08	0.17	-0.17	0.18	0.19	0.02	0.02	0.02	0.31	0.19	0.18	0.31	-0.01	0.23	0.22	-0.05	0.07	0.26	0.28	0.25	0.09	0.15	0.13	0.08	0.12	0.28	0.17	0.23	0.2	0.29	0.31	0.22	-0.02	0.01	0.29	0.17	-0.04	0.16	0.33	0.17	0.16	0.05	0.23	-0.04	0.11
AKAP9	0	0.03	-0.04	0.04	0	0.04	0.02	0.12	0.11	0.05	0.09	-0.01	0.04	0.04	0	0.11	0.03	0.01	0.06	0.13	-0.08	0.07	0.01	0.03	0.06	-0.02	-0.02	0.03	-0.06	-0.05	0.03	0.05	-0.12	0.1	-0.01	0.07	-0.01	-0.04	0.18	0.07	0	0.03	0.04	0.02	0.01	-0.07	0.13	-0.02	-0.04
AKIP1	-0.03	-0.08	-0.02	-0.12	-0.01	-0.1	0.04	-0.02	-0.04	-0.07	-0.2	0.02	-0.15	-0.22	-0.01	-0.17	0	-0.19	-0.03	-0.21	0.11	-0.13	-0.04	-0.13	-0.08	-0.07	0.04	-0.06	-0.03	-0.14	-0.13	-0.11	-0.19	-0.19	-0.1	-0.07	0.07	0	-0.34	-0.08	-0.01	-0.11	-0.16	-0.07	-0.13	0.02	-0.11	-0.04	-0.06
AKIRIN1	-0.04	-0.02	0.08	0.08	0.06	0.1	0.1	0.02	0.02	-0.01	-0.1	-0.07	0.06	0.27	0.01	0.11	0.02	0.12	0.02	-0.02	0.01	0.07	0.11	0.01	-0.01	0.14	0.09	0.03	0.05	-0.01	0.04	0.08	0.13	0.05	0.15	0.05	-0.01	0.05	0.17	0.06	-0.01	0.06	0.09	0.08	0.07	-0.03	0.09	-0.08	0
AKIRIN2	0	0.06	0.14	0.15	-0.02	0.11	-0.06	0.01	0.1	0	-0.01	0.01	0.22	0.14	0.11	0.14	-0.05	0.18	0.15	-0.1	0.16	0.08	0.16	0.11	0.06	0.14	0.14	0.07	0.03	0.2	0.13	0.15	0.16	0.15	0.22	0.05	-0.04	0.04	0.14	0.07	0.02	0.07	0.27	0.13	0.08	-0.03	0.11	-0.02	0.09
AKNA	0	0.13	0.25	0.25	-0.07	0.24	-0.11	0.22	0.2	0.01	0.09	-0.05	0.29	0.21	0.09	0.32	0.02	0.25	0.25	-0.01	0.1	0.26	0.22	0.24	0.12	0.12	0.11	0.01	0.1	0.3	0.14	0.21	0.29	0.27	0.24	0.22	0.01	-0.07	0.32	0.16	-0.05	0.13	0.34	0.13	0.23	0.05	0.27	-0.11	0.12
AKNAD1	-0.05	-0.02	-0.05	-0.1	0.02	-0.1	0.12	-0.17	-0.14	0.05	-0.17	-0.03	-0.12	-0.1	-0.08	-0.17	-0.04	-0.06	-0.1	-0.04	-0.01	-0.2	-0.1	-0.21	-0.03	-0.1	-0.03	-0.05	-0.08	-0.18	-0.09	-0.07	-0.07	-0.14	-0.12	-0.13	-0.02	0.04	-0.16	-0.03	0	-0.09	-0.15	-0.07	-0.15	0	-0.12	0.01	-0.07
AKR1A1	-0.09	0.05	0.01	0.14	0.06	0.08	-0.12	0.21	0.16	0	0.1	0	0.17	0.09	0.06	0.16	-0.03	0.13	0.1	0.08	0.01	0.09	0.13	0.11	0.01	0.12	0	0	0.09	0.07	0.02	0.15	0.03	0.15	0.16	0.07	0.12	0.05	0.17	0.09	-0.04	0	0.16	0.16	0.13	-0.06	0.09	-0.01	0
AKR1B1	0.09	-0.05	0.02	-0.09	-0.07	-0.06	-0.03	0.01	0.02	0.03	-0.17	-0.05	-0.09	-0.09	-0.01	-0.1	-0.01	-0.17	0.02	-0.22	-0.05	-0.1	-0.08	-0.1	-0.07	-0.13	0	0.08	-0.07	-0.01	-0.06	-0.1	-0.28	-0.09	-0.09	-0.12	-0.08	0.05	-0.21	-0.02	0.06	-0.03	-0.11	-0.04	-0.06	-0.03	-0.12	0	-0.06
AKR1B10	-0.01	-0.11	-0.29	-0.22	0.02	-0.21	0.26	-0.18	-0.13	-0.03	0.04	0	-0.24	-0.25	-0.13	-0.29	-0.02	-0.29	-0.2	0.11	-0.18	-0.3	-0.28	-0.16	-0.08	-0.2	-0.14	-0.09	-0.14	-0.18	-0.19	-0.25	-0.18	-0.25	-0.21	-0.17	0.02	-0.04	-0.37	-0.23	0.11	-0.12	-0.3	-0.14	-0.16	0	-0.27	-0.04	-0.07
AKR1C1	-0.05	-0.14	-0.25	-0.16	0.06	-0.16	0.19	-0.17	-0.15	-0.01	0.01	-0.02	-0.16	-0.26	-0.1	-0.25	-0.03	-0.22	-0.14	0.06	-0.07	-0.29	-0.16	-0.12	-0.12	-0.07	-0.07	-0.15	-0.11	-0.1	-0.09	-0.17	-0.23	-0.18	-0.18	-0.16	0.07	-0.04	-0.29	-0.2	0.08	-0.07	-0.2	-0.12	-0.2	-0.03	-0.23	-0.06	-0.05
AKR1C2	-0.04	-0.12	-0.29	-0.16	0.07	-0.14	0.21	-0.18	-0.17	0.02	0.09	0.01	-0.15	-0.18	-0.09	-0.23	-0.02	-0.18	-0.17	0.11	-0.12	-0.24	-0.19	-0.1	-0.09	-0.08	-0.11	-0.13	-0.1	-0.11	-0.07	-0.2	-0.17	-0.16	-0.15	-0.16	0.03	-0.04	-0.26	-0.2	0.07	-0.07	-0.19	-0.09	-0.19	0	-0.23	-0.05	-0.02
AKR1C3	0.03	-0.15	-0.23	-0.18	0.05	-0.16	0.15	-0.13	-0.1	-0.01	0.04	0.02	-0.17	-0.28	-0.13	-0.26	-0.02	-0.28	-0.19	0.14	-0.14	-0.27	-0.2	-0.11	-0.1	-0.06	-0.11	-0.19	-0.1	-0.12	-0.16	-0.23	-0.25	-0.2	-0.16	-0.15	0.05	0.01	-0.25	-0.22	0.11	-0.11	-0.24	-0.12	-0.17	0.01	-0.26	0.01	-0.09
AKR1C4	0.01	-0.08	-0.13	-0.05	0.03	-0.03	0.11	-0.07	-0.04	-0.03	0.06	-0.02	-0.06	-0.11	-0.09	-0.09	0	-0.07	-0.1	0.07	-0.13	-0.19	-0.09	-0.04	-0.06	-0.02	-0.06	-0.12	-0.07	-0.04	0	-0.05	-0.19	-0.12	-0.06	-0.07	0	-0.05	-0.08	-0.05	0.02	-0.08	-0.07	-0.07	-0.07	0	-0.06	0.03	-0.04
AKR1C6P	0	0.05	-0.02	0.11	0.02	0.03	-0.17	0.11	0.08	0	0.01	-0.06	0.12	0.15	-0.01	0.11	0.01	0.15	0.1	-0.08	-0.03	0.09	0.11	0.08	0.12	0.15	0.03	0.02	0.03	0.06	0.11	0.11	-0.08	0.07	0.09	0.07	0.09	0.07	0.15	0.05	-0.02	0.04	0.16	0.1	0.08	-0.06	0.07	0.11	-0.03
AKR1D1	0.07	0.02	0	0.01	0.03	0.06	0	0.04	0.03	0.04	-0.03	-0.03	0.05	0.12	-0.03	0.06	0.03	0.16	-0.01	-0.05	0.01	0.05	0	-0.02	0.01	0	0.06	0.05	-0.01	0.01	0.03	-0.01	-0.09	0.04	0.01	0.04	-0.06	-0.03	0.1	0.03	-0.01	0.07	0.05	-0.06	-0.01	-0.03	0.09	-0.01	-0.02
AKR1E2	0.05	-0.01	-0.09	-0.06	-0.02	-0.01	0	-0.05	-0.05	0.08	0.06	0.02	-0.01	-0.03	-0.05	-0.14	0.04	-0.09	-0.12	0.08	0	-0.1	-0.08	-0.07	-0.09	-0.05	-0.12	-0.04	0.01	-0.04	-0.03	-0.04	-0.07	-0.03	-0.13	-0.03	0.02	0.04	-0.14	0	0.09	-0.02	-0.05	-0.06	-0.02	0.04	-0.1	0	0
AKR7A2	-0.03	0.09	0.04	-0.03	-0.07	0.09	-0.19	0.09	0.05	0.01	-0.13	0.05	-0.04	0.09	0.05	0.09	-0.02	0.07	0.06	-0.09	0.05	0.06	0.05	-0.01	-0.04	0.04	0.06	0.04	0.04	0	-0.02	0.02	0.11	0.01	-0.01	0.03	0.04	0.01	0.08	0.03	0.03	0.08	0.04	0.05	0.01	-0.04	0.11	-0.12	-0.13
AKR7A3	-0.03	0.05	-0.05	-0.03	-0.05	0.06	0	0.04	0.04	-0.02	-0.1	0.01	-0.04	0.06	-0.01	0.06	-0.02	0.01	0.01	0.06	-0.09	0.01	0	0.04	0.03	0.02	-0.01	-0.02	0.02	0	-0.01	-0.01	0.17	-0.03	0.03	0.04	0.06	0.08	0.12	0	0.01	0.03	0	0.02	0.03	-0.02	0.09	-0.08	-0.13
AKT1	0.05	0.07	-0.02	0.03	-0.05	0.1	-0.11	0.05	0.01	0.02	0.04	0.06	0.04	0	0.09	0.04	0.02	0.05	0.01	0.01	0.15	0.08	0.05	0.02	-0.03	0.01	0.02	0.08	0.01	0.03	-0.01	-0.01	0.05	0.08	-0.02	0.02	0.04	-0.02	-0.03	0.06	0.04	0	-0.03	-0.01	0.02	0.05	0.02	-0.01	0.04
AKT1S1	0.07	-0.12	-0.21	-0.22	-0.01	-0.16	0.14	-0.28	-0.23	-0.03	-0.12	-0.01	-0.25	-0.24	-0.07	-0.29	-0.12	-0.25	-0.19	0.06	-0.15	-0.3	-0.2	-0.2	-0.1	-0.23	-0.1	-0.06	-0.1	-0.29	-0.13	-0.21	-0.13	-0.24	-0.22	-0.21	0.07	0.14	-0.4	-0.18	0.12	-0.15	-0.29	-0.07	-0.15	-0.07	-0.31	0.18	-0.16
AKT2	0.02	0.03	0.18	0.11	-0.03	0.15	-0.13	0.12	0.15	0.04	-0.03	-0.01	0.16	0.14	0.08	0.24	0.01	0.2	0.17	-0.04	-0.04	0.16	0.18	0.11	0.03	0.07	0.08	0.11	0.11	0.13	0.14	0.11	0.18	0.15	0.17	0.15	-0.02	0.01	0.24	0.13	0.01	0.1	0.21	0.12	0.17	0.01	0.12	-0.06	-0.04
AKT3	0.06	0.02	0.09	-0.05	0.01	-0.08	-0.03	-0.03	0	-0.02	-0.23	0.02	-0.07	-0.09	0.03	-0.05	-0.01	-0.15	0.03	-0.16	-0.01	0.03	0.02	-0.09	-0.07	-0.03	0.11	0.05	-0.09	-0.06	-0.13	-0.05	-0.12	-0.07	-0.09	-0.04	-0.16	-0.03	-0.16	0.03	-0.02	-0.02	-0.08	-0.02	-0.06	-0.09	-0.02	-0.01	-0.02
AKTIP	-0.09	-0.07	-0.16	-0.17	0.1	-0.11	0.2	-0.21	-0.25	0	0.13	0.03	-0.24	-0.25	-0.13	-0.29	-0.07	-0.25	-0.28	0.15	-0.08	-0.17	-0.3	-0.17	-0.09	-0.11	-0.2	-0.08	-0.1	-0.25	-0.17	-0.21	-0.28	-0.25	-0.22	-0.19	0.12	-0.01	-0.29	-0.18	0	-0.19	-0.31	-0.1	-0.11	-0.06	-0.24	0.06	-0.04
ALAD	-0.05	0	0.04	0	-0.06	0.09	-0.08	0.03	0.01	0.04	-0.02	-0.01	0.02	-0.03	0.06	0.11	-0.02	0.01	0.1	-0.05	0.1	0.13	0.08	0.07	0.04	0.07	0.13	0.03	0.07	0.08	0.05	0	0.09	0.11	0.05	0.09	0.13	-0.05	0.06	0.06	-0.01	0.08	0.09	-0.02	0.06	0.05	0.13	0	-0.05
ALAS1	-0.09	-0.03	-0.08	0.05	-0.1	-0.02	0.06	-0.12	-0.06	-0.12	-0.06	0.01	-0.05	0.07	-0.08	-0.02	-0.01	-0.01	0	-0.04	-0.05	-0.11	-0.01	0.07	0.04	0.01	-0.02	-0.1	0.1	0.05	0	0.02	0.15	-0.01	0.06	0.01	0.05	0.04	0	-0.05	-0.03	0	0.06	-0.02	0.01	0.1	0	-0.09	0.01
ALAS2	0	0.03	0.13	0.07	-0.02	0.09	-0.13	0.09	0.05	-0.02	0.08	0.01	0.06	0.18	0.05	0.16	0.09	0.15	0.05	-0.15	0.08	0.08	0.08	0.06	0.11	0.1	0.05	0.03	0.1	0.16	0.13	0.11	0.08	0.06	0.13	0.05	0	-0.09	0.14	0.08	-0.02	0.12	0.16	0.02	0.09	0.06	0.14	-0.08	0.05
ALB	0.09	0.1	0.07	0.09	0.01	0.07	-0.07	0.11	0.09	-0.02	0.02	-0.01	0.1	0.06	0.02	0.15	-0.05	0.13	0.06	0.03	-0.01	0.14	0.15	0.09	0.1	0.13	0.13	-0.01	0.07	0.08	0.11	0.12	0.11	0.08	0.15	0.05	0.04	0.08	0.17	0.07	0.01	0.02	0.13	0.13	0.11	-0.03	0.11	-0.1	0.04
ALCAM	-0.02	-0.12	-0.13	-0.22	0.08	-0.15	0.13	-0.12	-0.17	-0.04	0.04	0	-0.21	-0.4	-0.1	-0.31	-0.04	-0.27	-0.24	0.01	-0.08	-0.22	-0.27	-0.24	-0.05	-0.14	-0.16	-0.02	-0.18	-0.28	-0.22	-0.21	-0.28	-0.23	-0.28	-0.24	0.05	-0.03	-0.4	-0.17	0.04	-0.14	-0.37	-0.12	-0.22	-0.02	-0.28	-0.04	-0.02
ALDH16A1	0.04	0.05	0.03	0.13	-0.08	0.11	-0.14	0.05	0.05	0	0.17	-0.03	0.14	0.15	0.11	0.19	-0.09	0.19	0.07	0.01	0.03	0.12	0.11	0.15	0.08	-0.01	0.03	0.02	0.14	0.19	0.2	0.05	0.24	0.16	0.16	0.08	0	0	0.14	0.02	0	0.09	0.15	0.07	0.07	0.06	0.05	0.14	0.02
ALDH18A1	-0.15	0.02	0.08	0.08	-0.08	0.05	-0.16	0.11	0.03	0.04	0.01	-0.03	0.09	0.03	-0.02	0.06	-0.04	0.05	0.09	-0.04	0.06	0.1	0.07	0.12	0.11	0.06	0.03	0	0.08	0.11	0.09	0.13	0.29	0.07	0.09	0.06	0.02	-0.06	0.11	0.1	-0.01	-0.08	0.18	0.03	0.06	-0.04	0.04	-0.12	0
ALDH1A1	-0.02	-0.01	-0.15	-0.05	0.02	-0.03	0.21	-0.02	0	-0.03	0.01	-0.05	-0.06	-0.03	-0.09	-0.09	0.01	-0.11	-0.07	0.11	-0.12	-0.1	-0.08	0.04	-0.07	-0.04	-0.1	-0.1	-0.03	-0.09	-0.05	-0.06	0.13	-0.1	-0.05	0.02	0.03	-0.07	0	-0.1	0.04	-0.06	-0.02	-0.03	-0.01	-0.03	-0.07	-0.06	-0.06
ALDH1A2	0.05	0	0	0.02	0.02	0.04	0.06	0.05	0.04	-0.05	0.11	0	0.03	0.08	0	0.04	-0.02	0.07	-0.05	0.04	-0.08	0	-0.02	0.06	0.09	0.02	0	-0.01	0.04	0.01	0.07	0.02	-0.03	-0.01	0.09	-0.01	0.01	0	0.08	-0.04	0.02	0.05	0.03	0	0.01	0.03	0.05	0.06	0.02
ALDH1A3	-0.07	-0.17	-0.26	-0.28	-0.01	-0.16	0.12	-0.27	-0.27	-0.08	0.06	-0.02	-0.3	-0.24	-0.15	-0.36	-0.06	-0.28	-0.33	0.09	-0.1	-0.32	-0.42	-0.26	-0.18	-0.32	-0.28	-0.04	-0.15	-0.27	-0.21	-0.3	-0.18	-0.32	-0.36	-0.25	0	-0.04	-0.47	-0.26	0.07	-0.19	-0.42	-0.17	-0.25	0.03	-0.36	-0.01	0
ALDH1B1	-0.03	-0.02	-0.07	0.01	-0.03	-0.01	0	-0.07	-0.07	-0.01	-0.1	0.02	-0.01	0	-0.05	-0.05	0.01	-0.02	0	0.02	0.04	-0.06	0.02	0.05	0.01	0.01	0.02	-0.06	0.11	-0.06	0.03	0.02	0.06	-0.05	0.03	-0.05	0.05	-0.04	-0.05	-0.01	0.05	-0.06	0.06	0	0.01	-0.02	-0.06	0.05	-0.04
ALDH1L1	-0.01	0.03	-0.02	0.14	0.03	0.06	-0.08	0.12	0.09	0.02	0.11	0.02	0.09	0.1	0.06	0.11	-0.04	0.07	0.01	0.12	-0.06	0.03	0.03	0.13	0.04	-0.03	-0.04	-0.02	0	0.11	0.05	0.08	-0.1	0.1	0.15	0.02	-0.04	0.07	0.12	0.05	-0.02	0.08	0.08	0.07	0.06	0	0.01	-0.01	0.08
ALDH1L2	-0.08	0	0.06	0.01	-0.04	-0.03	-0.03	-0.05	-0.09	-0.01	-0.08	0.03	0.04	0.04	-0.01	-0.05	0	0.01	0.05	-0.07	0.03	0.01	0.09	-0.04	0.03	0.09	0.12	0.04	0.01	0.04	0.04	0.05	-0.02	0.01	0.01	-0.02	-0.01	-0.16	-0.06	0.1	-0.05	0.03	0.04	-0.05	0.05	-0.06	0	-0.06	0.05
ALDH2	-0.06	-0.1	-0.16	-0.08	0.02	-0.07	0.14	-0.12	-0.03	0.03	0.12	0.03	-0.03	-0.15	-0.1	-0.15	-0.08	-0.08	-0.07	0.2	-0.13	-0.08	-0.11	0.03	-0.02	-0.04	-0.1	-0.07	-0.09	-0.08	-0.08	-0.08	0.03	-0.04	-0.06	-0.06	-0.01	-0.09	-0.06	-0.08	0.08	-0.07	-0.09	-0.04	-0.02	-0.11	-0.1	-0.06	-0.01
ALDH3A1	0.05	-0.06	-0.26	-0.04	0.04	-0.06	0.03	-0.15	-0.12	-0.01	0.18	0.03	-0.04	-0.12	-0.05	-0.19	-0.05	-0.15	-0.17	0.11	-0.12	-0.21	-0.19	-0.03	-0.01	-0.11	-0.13	-0.09	-0.06	-0.08	-0.05	-0.11	-0.02	-0.08	-0.09	-0.14	0.04	0.14	-0.23	-0.09	0.08	-0.08	-0.12	-0.02	-0.03	0.02	-0.2	0.18	0.06
ALDH3A2	-0.02	-0.05	-0.32	-0.14	0.09	-0.16	0.25	-0.19	-0.17	-0.02	0.08	0.01	-0.18	-0.17	-0.06	-0.32	-0.1	-0.19	-0.22	0.16	-0.08	-0.22	-0.21	-0.08	-0.07	-0.11	-0.15	-0.11	-0.1	-0.25	-0.16	-0.2	-0.04	-0.15	-0.16	-0.16	0.07	0.05	-0.26	-0.21	0.09	-0.07	-0.19	-0.04	-0.12	-0.04	-0.28	0.11	-0.04
ALDH3B1	0.01	-0.15	-0.19	-0.25	-0.01	-0.19	0.09	-0.16	-0.15	-0.02	0.01	0.04	-0.23	-0.39	-0.06	-0.32	-0.09	-0.35	-0.23	-0.05	0	-0.25	-0.33	-0.17	-0.08	-0.22	-0.18	-0.03	-0.16	-0.16	-0.2	-0.3	-0.15	-0.27	-0.29	-0.27	0.05	0.02	-0.42	-0.23	0.07	-0.1	-0.37	-0.18	-0.18	0.02	-0.35	0.03	-0.11
ALDH3B2	-0.13	-0.04	-0.14	-0.04	-0.01	0.02	0.01	-0.1	-0.07	0	0.29	0.01	-0.08	-0.01	-0.05	-0.01	-0.04	-0.03	-0.18	0.17	-0.1	-0.09	-0.19	-0.05	-0.03	-0.13	-0.21	-0.01	-0.08	-0.07	-0.04	-0.02	0.01	-0.05	-0.02	-0.03	0.13	-0.14	-0.02	-0.06	0.06	-0.03	-0.09	-0.03	-0.03	0.06	-0.1	-0.04	0.02
ALDH4A1	-0.01	0.01	-0.08	-0.08	-0.03	-0.02	0.02	-0.03	-0.02	-0.02	0.02	0	-0.05	0.01	0.05	0	-0.12	0.02	0.03	0.07	-0.04	-0.03	0.04	0.02	-0.02	-0.01	0.01	0	0.08	-0.08	-0.04	0	-0.02	0	-0.02	0.03	0.1	0.09	-0.06	-0.1	-0.02	0.01	-0.04	0.04	-0.01	0.05	-0.02	0.01	-0.1
ALDH5A1	0.04	0.15	0.08	0.21	-0.01	0.19	-0.18	0.22	0.24	0.03	0.2	0.06	0.27	0.24	0.12	0.31	0.03	0.26	0.16	0.1	0.03	0.28	0.24	0.27	0.07	0.17	0.06	0.01	0.11	0.22	0.15	0.22	0.11	0.28	0.25	0.27	-0.06	-0.05	0.39	0.11	-0.04	0.14	0.32	0.2	0.25	-0.02	0.24	0.01	0.06
ALDH6A1	-0.12	0.08	0.09	0.08	-0.02	0.11	-0.05	0.12	0.06	0.02	0.11	0.01	0.14	0.1	0.06	0.2	-0.02	0.15	0.09	0.05	0.05	0.19	0.11	0.12	0.09	0.14	0.01	0.05	0.04	0.11	0.09	0.15	0.12	0.12	0.1	0.05	0.04	0.03	0.25	0.04	-0.03	0.07	0.12	0.08	0.09	-0.02	0.14	-0.03	-0.05
ALDH7A1	-0.07	-0.12	-0.13	-0.21	0.05	-0.17	0.08	-0.13	-0.18	0	-0.05	0.06	-0.21	-0.22	-0.1	-0.31	-0.05	-0.21	-0.2	0	-0.07	-0.14	-0.19	-0.17	-0.13	-0.12	-0.1	-0.06	-0.14	-0.27	-0.19	-0.18	0.03	-0.18	-0.25	-0.14	0.01	-0.18	-0.27	-0.15	0.05	-0.16	-0.28	-0.08	-0.15	-0.07	-0.24	0.01	-0.09
ALDH8A1	0.11	0.11	0.11	0.16	0.1	0.07	0.02	0.08	0.14	0.02	0.03	0.06	0.14	0.09	0.09	0.18	0.06	0.14	0.09	0.08	0	0.15	0.13	0.11	0.07	0.1	0.1	0	0.11	0.15	0.07	0.11	-0.12	0.09	0.16	0.11	-0.02	0.03	0.18	0.11	0.01	0.1	0.22	0.12	0.09	0.06	0.12	0.05	0.05
ALDH9A1	-0.01	0.05	-0.05	0.05	-0.04	0.04	0.03	0.01	-0.04	0	-0.06	-0.02	-0.03	0.05	-0.01	0.03	-0.02	-0.08	-0.01	0.15	-0.07	0.02	0.04	0.05	0.03	-0.08	-0.04	-0.04	0.06	-0.11	0.03	0.06	0.05	-0.01	0.07	0.04	-0.02	0.06	-0.01	0.04	-0.02	-0.02	0.03	0.07	0.03	-0.03	0.04	0.03	-0.04
ALDOA	0.04	-0.07	-0.1	-0.16	-0.06	-0.07	-0.05	-0.06	-0.11	0.02	-0.11	-0.02	-0.18	-0.14	-0.02	-0.18	-0.09	-0.11	-0.16	-0.1	-0.05	-0.12	-0.2	-0.15	-0.01	-0.14	-0.1	0.01	-0.03	-0.11	-0.08	-0.19	0.15	-0.18	-0.18	-0.18	0.03	0.08	-0.18	-0.11	0.09	-0.06	-0.2	-0.1	-0.12	-0.07	-0.2	0.12	-0.21
ALDOB	0.12	0.03	0.04	0.09	-0.08	0.11	-0.12	0.05	0.05	-0.06	0.09	-0.06	0.09	0.16	-0.03	0.13	0	0.21	0.04	0.01	-0.11	-0.01	0.01	0.07	0.02	-0.03	0.01	0.01	0.02	0.07	0.11	0.08	0	0.09	0.11	0.06	-0.06	0.02	0.15	0.07	0.01	0.05	0.11	-0.01	0.07	0.04	0.13	0.13	0.11
ALDOC	-0.08	-0.04	-0.06	0	-0.05	0.07	-0.01	0.08	0.01	-0.01	0.05	-0.01	0.05	0.11	0.02	0.13	-0.01	0.08	0.01	0.03	0	0.12	-0.01	0.13	0.1	0.02	0.01	-0.02	0.03	0.06	0.06	0.02	0.26	0.05	0.1	0.02	-0.06	0.02	0.14	0.03	0.03	0.06	0.13	0.03	0.05	-0.02	0.04	-0.09	0
ALG1	-0.05	0.02	-0.12	-0.07	-0.01	-0.05	-0.04	-0.08	-0.09	-0.04	-0.06	0.07	-0.12	-0.05	-0.03	-0.08	-0.04	-0.05	-0.03	0.05	-0.04	-0.02	-0.1	-0.02	0.01	-0.04	-0.05	-0.04	0.01	-0.09	-0.01	-0.08	0.06	-0.09	-0.08	0.05	0.02	0.04	-0.05	-0.07	0.08	-0.05	-0.07	-0.02	0.04	-0.01	0	0.08	-0.11
ALG10	-0.1	0.04	-0.02	0.1	-0.05	0.05	-0.11	0.08	-0.02	0.05	0.1	-0.01	0.02	0.14	-0.01	0.02	0.07	0.17	-0.07	0.01	-0.03	0.04	-0.02	0.03	0.09	0.02	-0.04	-0.07	0.12	0.09	0.09	0.03	0.08	0.04	0.07	0.04	0.02	0.1	0.11	0.02	-0.02	0	0.07	0.02	0.01	0.13	0.07	0.09	0.07
ALG10B	0.03	0.04	0.14	0.19	0.04	0.12	0	0.24	0.12	0.03	0.07	-0.01	0.18	0.28	0.13	0.19	0.02	0.2	0.1	-0.07	0.04	0.19	0.11	0.13	0.15	0.12	0.06	0.02	0.07	0.17	0.19	0.14	0.02	0.15	0.17	0.04	-0.11	0.08	0.29	0.11	-0.01	0.13	0.23	0.14	0.1	0.02	0.14	0.07	0.08
ALG12	0.06	-0.02	-0.17	-0.1	-0.05	-0.07	0.06	-0.12	-0.16	-0.05	0.06	-0.07	-0.15	-0.07	-0.02	-0.13	-0.14	-0.09	-0.09	0.08	-0.19	-0.15	-0.17	-0.04	-0.07	-0.18	-0.11	0.01	0.03	-0.11	-0.07	-0.15	-0.02	-0.11	-0.15	-0.08	-0.04	0.05	-0.14	-0.11	0.05	-0.04	-0.12	-0.07	-0.08	0	-0.15	0.11	-0.06
ALG13	-0.08	0.07	0.07	0.1	-0.02	0.08	-0.06	0.13	0.07	0.03	-0.06	0.02	0.07	0.08	0.03	0.07	0.03	0.1	0.09	-0.09	0.18	0.05	0.1	0	0.07	0.03	0.06	0.05	0.06	0.03	0.07	0.08	-0.13	0.04	0.06	0.01	0.01	0.05	0.06	0.07	-0.02	0.02	0.09	0.11	0.08	-0.01	0.07	-0.03	-0.01
ALG14	0.01	-0.07	-0.16	-0.09	0.1	-0.1	0.24	-0.13	-0.14	-0.04	-0.11	-0.04	-0.22	-0.1	-0.09	-0.2	-0.11	-0.14	-0.09	0.07	-0.06	-0.21	-0.14	-0.16	-0.08	-0.11	-0.02	-0.05	-0.02	-0.2	-0.08	-0.1	-0.27	-0.19	-0.08	-0.1	0.04	0.02	-0.18	-0.01	0.05	-0.07	-0.12	-0.05	-0.12	-0.04	-0.09	0.15	-0.09
ALG2	-0.06	-0.06	-0.16	-0.15	-0.01	-0.16	0.12	-0.19	-0.21	-0.07	0.01	-0.04	-0.2	-0.13	-0.1	-0.26	-0.09	-0.13	-0.15	0	0	-0.19	-0.22	-0.13	-0.06	-0.14	-0.12	-0.06	-0.1	-0.17	-0.11	-0.15	-0.03	-0.19	-0.15	-0.16	0.01	-0.04	-0.26	-0.18	-0.02	-0.11	-0.22	-0.09	-0.1	-0.01	-0.2	0.1	0.02
ALG3	0.02	-0.04	-0.15	-0.03	-0.08	-0.13	-0.1	-0.09	-0.1	-0.08	0.08	0.01	-0.1	-0.04	-0.03	-0.03	-0.06	-0.12	-0.11	0.07	-0.25	-0.18	-0.14	0	0.05	-0.17	-0.13	-0.06	0.06	-0.05	-0.03	-0.11	-0.1	-0.09	-0.06	-0.05	-0.02	-0.01	-0.08	-0.11	0.1	-0.06	-0.02	-0.08	-0.07	0.04	-0.06	0.15	-0.09
ALG5	-0.03	0	-0.08	0.14	-0.02	0.04	-0.03	-0.02	0.02	-0.03	0.05	-0.04	-0.01	0.12	0.01	0.1	-0.01	0.15	0.04	0.11	-0.12	-0.01	-0.01	0.11	0.06	-0.03	0.02	-0.03	0.04	0.09	0.08	-0.01	0.09	0.06	0.09	0.1	-0.08	-0.03	0.08	0.02	0.01	0.05	0.11	0	0.02	0.03	0.13	0.08	0.02
ALG6	-0.05	0.08	0.01	0.13	-0.04	0.13	-0.03	0.13	0.1	0.01	0.13	0.01	0.05	0.27	0.05	0.16	-0.01	0.12	0.08	0.11	0	0.05	0.03	0.04	0.03	-0.04	-0.05	0.09	0.18	0.07	0.08	0.13	-0.03	0.1	0.13	0.1	0	0.03	0.2	0.09	0.06	0.08	0.17	0.11	0.06	0.02	0.12	0	0.05
ALG8	0.05	-0.04	-0.02	-0.01	-0.08	-0.04	-0.04	0.02	-0.06	-0.01	0.12	0.03	-0.01	0	0	0	-0.05	0.05	-0.03	0.08	0.04	-0.04	-0.03	0.03	0.05	-0.02	-0.05	-0.02	0.07	0	0.07	-0.02	0.18	0.01	0.03	0	0.06	0.01	0.06	-0.06	0.04	-0.06	0.02	0.04	0.02	0.07	-0.03	0.01	-0.02
ALG9	0.04	0	0.1	0.12	0	0.04	-0.02	0.08	0.13	-0.02	-0.07	0.07	0.11	0.04	0.03	0.12	0.04	0.07	0.13	-0.07	0.12	0.04	0.16	0.08	0.06	0.05	0.14	-0.01	0.07	0.04	0.1	0.13	-0.13	0.1	0.13	0.12	-0.04	0.06	0.1	0.07	-0.04	0	0.14	0.09	0.08	-0.03	0.14	0.01	0.04
ALK	-0.05	-0.01	0.08	0.09	0	0.05	-0.11	0.08	0.08	0.03	-0.02	-0.02	0.08	0.14	0.03	0.1	0	0.07	0.05	-0.01	-0.02	0.06	0.07	0	0.04	0.03	0.05	0.09	0.09	0.04	0.08	0.05	-0.21	0.07	0.06	0.05	-0.03	-0.03	0.12	0.07	0.04	0.1	0.07	0.07	-0.02	-0.03	0.11	-0.06	-0.01
ALKBH1	-0.02	0.14	0.11	0.25	0	0.14	-0.12	0.16	0.1	0.03	0.12	0.06	0.27	0.24	0.14	0.22	0.03	0.23	0.1	0.02	0.17	0.16	0.18	0.12	0.07	0.11	0.02	0.1	0.14	0.2	0.11	0.21	0.03	0.22	0.24	0.13	-0.08	0.09	0.26	0.18	0.02	0.1	0.28	0.13	0.13	0.01	0.15	0.11	0.18
ALKBH2	-0.06	0.07	0.09	0.18	-0.06	0.11	-0.02	0.07	0	0.02	0	-0.01	0.16	0.19	0.04	0.16	0.02	0.2	0.07	0.06	0.07	0.12	0.14	0.11	0.08	0.11	0.04	-0.04	0.18	0.08	0.14	0.16	0.06	0.12	0.21	0.13	-0.08	0.05	0.27	0.08	0.02	0.05	0.26	0.12	0.12	-0.03	0.11	0.04	0.04
ALKBH3	0.01	0.03	-0.03	0.02	-0.05	-0.05	-0.16	-0.03	-0.03	-0.02	-0.05	0.01	-0.05	0.04	0.05	0.03	-0.05	0.06	0	-0.03	0.02	-0.07	0.02	-0.04	-0.01	0.01	0.06	-0.03	0.08	-0.01	0.04	0.01	-0.22	0	0	-0.01	-0.04	0.1	-0.05	-0.03	-0.05	0.01	0.01	0.04	0	-0.04	0.03	-0.01	-0.07
ALKBH4	0.03	0.04	0.05	0.12	-0.14	0.07	-0.18	0.1	0.06	0.04	-0.06	0.01	0.15	0.11	0.07	0.13	0.03	0.14	0.15	0	-0.02	0.07	0.12	0.14	0.1	-0.04	0.08	0.08	0.11	0.08	0.13	0.07	0.03	0.15	0.11	0.09	-0.08	-0.08	0.15	0.11	0.03	0	0.18	0.07	0.11	-0.01	0.12	0.05	-0.03
ALKBH5	0.01	0.05	0.06	0.06	0	0.08	-0.05	0.07	0.01	-0.01	-0.1	0	0.07	0.03	0.08	0.07	-0.03	0.02	0.12	-0.14	0.13	0.09	0.09	0.05	0.04	0.05	0.05	0.06	0.07	0.08	0.03	0.06	-0.02	0.04	0.07	-0.02	0.02	-0.01	-0.01	0.1	0	0.02	0.09	0.05	0.03	-0.02	0.02	0	-0.02
ALKBH6	-0.01	0.01	0.03	-0.06	0	-0.01	0.02	-0.05	-0.01	-0.07	-0.05	0.02	-0.08	0.01	0	-0.01	-0.07	0.01	0	-0.03	0.03	-0.02	-0.03	-0.08	-0.04	-0.03	-0.05	0.06	0	-0.02	0.02	-0.07	0.09	-0.09	0.02	0.02	0.04	0.04	-0.03	-0.05	0	0.05	-0.08	0.02	-0.02	0.03	-0.02	0.04	-0.1
ALKBH7	0.03	0.07	0.14	0.08	-0.05	0.1	-0.15	0.08	0.06	-0.04	-0.07	-0.02	0.14	0.07	0.1	0.16	-0.02	0.07	0.16	-0.12	0.19	0.1	0.16	0.15	0.06	0.04	0.08	0.05	0.15	0.12	0.15	0.13	0.02	0.13	0.16	0.07	0.03	0.12	0.09	0.11	-0.02	0.05	0.19	0.09	0.12	0	0.14	0	-0.03
ALKBH8	0	0.06	0.15	0.17	-0.03	0.17	-0.07	0.1	0.04	0.05	-0.06	-0.03	0.14	0.14	0.07	0.1	0.06	0.2	0.14	-0.13	0.19	0.02	0.13	0.09	0.09	-0.06	0.09	0.05	0.15	0.11	0.12	0.1	-0.02	0.12	0.16	0.09	-0.04	0.08	0.06	0.12	0.04	0.12	0.19	0.12	0.07	0.05	0.07	0	0.08
ALLC	0.09	0.12	0.06	0.18	0	0.18	-0.05	0.1	0.07	0.04	0.16	0.02	0.2	0.29	0.07	0.16	0.02	0.27	0.06	0	0.06	0.17	0.13	0.17	0.09	0.08	-0.01	0.05	0.1	0.19	0.17	0.17	0.1	0.16	0.2	0.05	-0.04	0.08	0.3	0.13	0.01	0.1	0.22	0.11	0.12	-0.01	0.14	0.1	0.06
ALMS1	0.02	0.15	0.16	0.25	0.11	0.16	-0.05	0.21	0.15	0.12	0.02	0.07	0.27	0.21	0.09	0.23	0.09	0.24	0.22	-0.01	0.09	0.23	0.27	0.14	0	0.22	0.17	0.05	0.12	0.18	0.12	0.18	0.09	0.24	0.23	0.14	-0.01	-0.08	0.28	0.2	-0.03	0.12	0.35	0.18	0.11	-0.08	0.23	0.07	0.07
ALOX12	-0.05	-0.03	-0.1	-0.02	-0.06	0.01	0.06	0	-0.08	-0.07	0.11	-0.03	-0.04	0.03	-0.04	0	-0.05	0.06	-0.04	0.02	-0.08	-0.11	-0.09	0.02	0.04	-0.11	-0.05	-0.06	-0.04	0.07	0.05	-0.04	0.04	-0.04	0	0	-0.05	0.03	0.01	0.01	0.04	0.01	0	-0.06	-0.06	0.09	-0.03	0.05	0.01
ALOX12B	0.07	0.02	-0.04	0.1	-0.01	0.06	0	-0.03	-0.01	-0.02	0.18	0.05	0.15	0.16	0.02	0.09	-0.08	0.12	-0.02	0.12	-0.01	0.04	0.02	0.15	0.07	-0.06	-0.1	-0.02	0.08	0.07	0.07	0.08	-0.02	0.07	0.12	0.01	-0.08	0.02	0.11	0.04	0.04	0.04	0.14	0.05	0.11	0	0	0.05	0.12
ALOX12P2	-0.06	-0.01	-0.1	0.05	0.09	0.05	0.08	0	-0.02	-0.01	0.27	0	0.09	0.09	0.03	0.03	-0.08	0.08	-0.08	0.06	-0.06	0	-0.07	0.07	0	-0.02	-0.13	0.03	0.01	0.08	0.03	0.01	0.15	0.05	0.08	-0.04	0.01	-0.01	0.13	-0.01	0.02	0.05	0.02	0.03	0.02	0.05	-0.06	0	0.12
ALOX15	-0.1	-0.04	-0.03	0.02	0.07	0.07	0.09	0.02	-0.01	-0.05	0.17	0.08	0.05	0.06	0.03	0.07	-0.06	0.05	-0.05	0.09	-0.03	-0.05	-0.05	0.03	0.06	-0.11	-0.11	0.01	0.06	0.01	0.08	0.02	-0.01	0.01	0.07	-0.01	0.1	-0.05	0.11	-0.05	-0.01	0.09	0.03	0.01	0.04	0.02	0	0.04	0.07
ALOX15B	0.04	0.01	0.02	-0.03	-0.05	0.02	-0.02	-0.01	-0.03	0	0.08	0.01	-0.01	0.15	-0.02	0	0	0.1	-0.06	0.01	-0.11	-0.04	-0.1	-0.02	-0.02	-0.03	-0.13	0.05	-0.02	-0.01	0.08	-0.01	-0.02	-0.05	-0.03	0	-0.03	0.02	0.07	-0.05	0.03	0.05	-0.02	-0.04	-0.01	0.06	0.01	0.08	-0.01
ALOX5	-0.07	0.01	0.02	0.07	-0.07	0.08	-0.17	0.05	0.08	0	0.24	-0.02	0.1	0.07	0.02	0.16	0.02	0.1	0.02	0.09	0.02	0.11	-0.03	0.11	0.04	0.02	-0.11	0.04	0.01	0.14	0.06	0.03	-0.05	0.08	0.06	0.01	-0.01	-0.01	0.15	0.03	-0.03	-0.02	0.07	0	0.1	0.03	0.06	0.09	0.09
ALOX5AP	0.13	0.08	0.29	0.16	-0.01	0.13	-0.13	0.22	0.18	0.04	0.03	-0.02	0.19	0.23	0.12	0.26	0.09	0.23	0.22	-0.22	0.17	0.23	0.17	0.1	0.15	0.12	0.13	0.14	0.13	0.31	0.19	0.15	-0.01	0.14	0.23	0.11	-0.07	0.01	0.26	0.19	-0.05	0.15	0.24	0.06	0.13	0.07	0.17	0.06	0.05
ALOXE3	-0.05	0.02	-0.04	0.04	-0.03	0	-0.05	-0.02	-0.05	0.03	0.17	-0.04	-0.01	0.04	-0.08	-0.04	-0.06	0.07	-0.09	0.06	-0.11	-0.04	-0.13	-0.01	0.04	-0.2	-0.17	0	0	0.02	0.01	-0.03	0.12	-0.04	-0.01	-0.03	-0.07	0.08	0.02	-0.03	-0.02	0.06	-0.02	-0.04	-0.01	0.04	-0.03	0.01	0.06
ALPI	0.13	0.14	0.09	0.07	-0.02	0.12	-0.13	0.07	0.07	0.08	0.13	-0.02	0.13	0.16	0.03	0.14	0.04	0.13	0.05	0.03	-0.05	0.09	0.08	0.08	0.05	0.08	0.02	0.05	0.03	0.08	0.08	0.13	0.13	0.07	0.14	0.01	0.05	0.08	0.15	0.09	0	0.07	0.11	0.03	0.1	0.09	0.12	0.06	0.03
ALPK1	-0.06	-0.04	0.02	0.1	-0.02	0.07	-0.04	0.04	0.05	0	0.18	-0.01	0.1	-0.03	0.02	0.08	-0.02	0.07	0.03	-0.01	0.05	0.05	-0.04	0.06	0.06	-0.06	-0.05	0.04	-0.01	0.18	-0.04	0.01	0.11	0.08	0.08	0.05	0	0.03	0.01	-0.02	-0.02	0.07	0.04	-0.03	0.01	0.09	0.01	-0.09	0.18
ALPK2	0.02	-0.03	0.12	-0.14	0.05	-0.11	-0.02	-0.07	-0.08	-0.02	-0.23	-0.08	-0.12	-0.22	-0.06	-0.16	0.06	-0.1	0.01	-0.27	0.02	-0.09	-0.06	-0.16	-0.01	0.05	0.07	0.08	-0.06	-0.05	-0.03	-0.11	-0.25	-0.19	-0.11	-0.13	-0.02	0	-0.22	-0.04	-0.02	-0.05	-0.15	-0.13	-0.09	-0.07	-0.1	0.04	-0.03
ALPK3	0.03	-0.02	-0.07	-0.06	-0.02	-0.02	0.07	0.02	-0.05	-0.02	0.14	0.04	-0.06	-0.02	-0.02	-0.04	-0.09	-0.03	-0.14	0.12	-0.06	0	-0.13	0.02	0.04	-0.07	-0.09	0.04	-0.04	-0.07	-0.03	-0.1	-0.12	-0.08	-0.02	-0.12	-0.02	-0.03	-0.03	-0.1	0.04	-0.03	-0.11	-0.04	-0.04	0.07	-0.08	0.07	-0.06
ALPL	0.03	0.07	0.11	0.01	0	0.07	0.06	0.02	0.02	0.01	0	-0.05	0.04	0.1	-0.04	0.05	-0.04	-0.01	0.01	0	-0.05	0.01	0.07	0.02	0.02	0.05	0.03	-0.02	-0.01	0.04	0.06	0.04	-0.26	0.02	0.09	0.02	0.06	0.07	0.07	0.04	0.03	0.08	0.06	-0.02	0.05	0.01	0.08	-0.01	-0.01
ALPP	0.04	-0.01	-0.08	-0.1	0.02	-0.01	0.12	-0.1	-0.05	0.02	0.18	-0.01	-0.1	-0.06	-0.02	-0.08	-0.05	-0.02	-0.18	0.08	-0.09	-0.11	-0.2	-0.06	-0.05	-0.09	-0.15	0	-0.09	-0.04	-0.02	-0.08	0.01	-0.15	-0.04	-0.1	-0.02	0.02	-0.07	-0.09	0.04	-0.06	-0.16	-0.07	-0.06	0.06	-0.12	0.14	-0.02
ALPPL2	0.02	-0.01	-0.11	0.01	0.01	0.02	0.15	-0.06	-0.05	0.02	0.2	0.02	0.02	-0.01	-0.02	-0.01	-0.03	-0.05	-0.15	0.16	-0.13	-0.03	-0.09	0.06	0	-0.07	-0.14	-0.04	-0.04	0	0.02	-0.07	0.1	-0.02	0	-0.06	0.03	0.05	0.02	-0.09	0.06	-0.01	-0.04	0.02	0.02	0.06	-0.07	0.08	0.02
ALS2	0.03	-0.06	-0.05	-0.19	0.07	-0.11	0.15	-0.16	-0.09	-0.02	-0.17	-0.02	-0.16	-0.12	-0.09	-0.16	0	-0.19	-0.05	-0.07	0.01	-0.16	-0.06	-0.16	-0.13	-0.04	-0.01	-0.1	-0.06	-0.16	-0.11	-0.08	-0.15	-0.19	-0.11	-0.1	0.07	0.09	-0.19	-0.16	-0.02	-0.1	-0.14	-0.1	-0.07	-0.04	-0.12	-0.04	-0.06
ALS2CL	-0.08	-0.17	-0.24	-0.17	0.01	-0.12	0.1	-0.19	-0.18	-0.07	0.31	0	-0.18	-0.18	-0.1	-0.25	-0.14	-0.17	-0.31	0.17	-0.09	-0.26	-0.38	-0.1	-0.1	-0.29	-0.32	-0.06	-0.11	-0.12	-0.14	-0.26	-0.08	-0.2	-0.17	-0.22	0.06	-0.02	-0.23	-0.21	0.01	-0.13	-0.31	-0.16	-0.14	0.05	-0.33	0.03	0.05
ALS2CR11	0.12	0.04	0.06	0.05	-0.02	0.13	-0.05	0.1	0	-0.03	-0.05	-0.04	0.05	0.22	0.05	0.16	0.06	0.1	0.05	-0.08	-0.01	0.02	0.07	-0.01	-0.01	0	0.02	0.08	0.02	0.06	0.04	0.08	-0.12	0.04	0.06	0.04	-0.07	-0.06	0.16	0.14	-0.02	0.07	0.07	-0.03	0	0.04	0.09	-0.07	0
ALS2CR12	0.07	0.06	0.03	0.01	0	0.1	-0.08	0.04	0.03	0.05	-0.01	-0.01	0.08	0.21	0.04	0.09	-0.03	0.11	0.03	-0.09	-0.04	0.06	0.04	0.03	0	0.05	0.06	-0.01	0.07	0.06	0.06	0.05	0.1	0.03	0.03	0.04	-0.02	0.03	0.11	0.09	0.03	0.04	0.09	-0.01	0.12	0.06	0.11	0	-0.03
ALS2CR8	-0.08	0.1	0.18	0.15	-0.01	0.14	-0.12	0.17	0.17	0.05	0.05	0.05	0.25	0.15	0.15	0.27	0.01	0.22	0.22	-0.11	0.24	0.26	0.21	0.24	0.1	0.18	0.15	0.06	0.01	0.22	0.13	0.16	0.12	0.26	0.16	0.16	0.04	-0.03	0.3	0.14	-0.05	0.13	0.21	0.14	0.17	-0.04	0.25	-0.17	0.08
ALX1	0.03	-0.03	-0.06	0.04	0	-0.01	0.1	-0.01	-0.03	0.01	-0.13	-0.06	-0.04	0.14	-0.08	-0.04	0.05	0.02	-0.05	-0.03	-0.17	-0.1	-0.02	-0.1	0.03	-0.08	0	-0.02	-0.04	-0.06	0.03	0.03	-0.01	-0.06	-0.06	0	-0.12	-0.06	0.02	0.05	-0.03	0.02	0.07	-0.03	-0.03	-0.03	0.03	-0.07	0.02
ALX3	0.04	0	0.08	0.02	-0.01	0.07	0.12	-0.02	-0.02	0.02	0.06	-0.01	0.08	0.07	0.01	0.09	-0.05	0.06	-0.01	0.04	-0.03	-0.03	0	0.07	0.04	0.01	0.03	0	0.01	0.09	0.06	-0.03	-0.08	0.04	0.07	0.02	0.01	0.01	0.08	0.08	-0.01	0.02	0.13	-0.03	0.05	0.03	0.09	0.02	0.07
ALX4	-0.01	0.05	0.09	0.09	0.02	0.02	-0.07	0.14	0.08	-0.01	0	-0.01	0.12	0.15	0.01	0.11	-0.01	0.1	0.07	-0.06	0.03	0.07	0.12	0.11	0.08	0.1	0.04	-0.02	0.08	0.1	0.06	0.07	-0.16	0.09	0.04	0.05	0.08	0.08	0.13	0.1	0	0.1	0.15	0.01	0.08	0.04	0.07	0.04	0
ALYREF	0.03	0.13	0.16	0.2	0	0.15	-0.11	0.17	0.13	0.12	0	-0.03	0.21	0.16	0.06	0.14	0.05	0.24	0.13	0	0.07	0.21	0.2	0.13	0.06	0.19	0.07	0.03	0.09	0.16	0.08	0.12	0.12	0.23	0.1	0.14	-0.09	-0.07	0.3	0.12	-0.02	0.1	0.27	0.07	0.11	-0.01	0.15	0.03	0.05
AMBN	-0.05	0	0.06	0.02	-0.05	0.08	0.03	0.06	0	0.01	-0.07	0.02	0.04	0.16	0.06	0.01	-0.04	0.1	0.03	-0.09	0	0.04	0.03	0.03	-0.02	0	0.01	0.05	0.02	0.04	0.04	0.03	-0.11	0	0.06	-0.02	-0.08	0.02	0.03	0.06	-0.01	0.07	0.05	0.01	0.07	-0.02	-0.01	-0.03	0.01
AMBP	-0.01	-0.05	-0.07	-0.14	-0.04	-0.01	-0.02	-0.05	-0.03	-0.1	-0.04	-0.07	-0.12	-0.04	-0.09	-0.06	-0.1	-0.09	-0.04	-0.06	-0.1	-0.07	-0.08	-0.03	-0.01	-0.03	-0.07	-0.03	0.02	-0.1	-0.04	-0.07	-0.11	-0.11	-0.06	-0.03	-0.06	0.02	0.01	-0.07	0.01	-0.06	-0.08	-0.1	-0.09	-0.09	-0.03	0	-0.14
AMBRA1	-0.16	0.05	0.06	0.16	-0.06	0.17	-0.19	0.12	0.12	0.01	0.04	0.03	0.17	0.25	0.09	0.22	-0.05	0.21	0.15	-0.03	0.03	0.15	0.18	0.17	0.03	0.04	0.05	0.02	0.1	0.15	0.16	0.13	0.15	0.22	0.14	0.17	-0.02	0.02	0.19	0.11	-0.03	0.08	0.19	0.12	0.17	-0.05	0.21	-0.1	0.05
AMD1	-0.03	0.07	0.03	0.17	-0.04	0.12	0.03	0	0.01	0	-0.02	-0.04	0.1	0.16	0.02	0.1	-0.02	0.19	0.07	0.03	0.09	-0.01	0.11	0.04	0.06	0.09	0.04	0.04	0.16	0.12	0.11	0.05	0.1	0.12	0.12	0.08	0.04	-0.02	0.09	0.07	0.08	0.04	0.21	0.06	0.03	0.06	0.04	-0.01	-0.01
AMDHD1	0.14	0.1	0	0.09	0.08	0.04	0.02	0	0	0.03	0.06	0.05	0.08	0.19	0.04	0.05	0.03	0.12	0.04	0.05	0.01	0.11	0.11	0.09	0.07	0.1	0.05	-0.06	0.11	0.08	0.04	0.08	0	0.1	0.11	0.07	-0.04	0.12	0.11	0	0.01	0.05	0.13	0.08	0.06	0.05	0.1	0.08	0.07
AMDHD2	0	-0.03	-0.11	-0.1	-0.06	-0.02	-0.16	-0.05	-0.11	-0.1	-0.13	-0.05	-0.09	-0.01	-0.05	-0.04	-0.06	-0.07	-0.07	-0.14	-0.07	-0.13	-0.1	-0.03	0	-0.05	-0.07	-0.02	0.02	-0.08	0.04	-0.09	0.1	-0.15	-0.08	0	0.13	0.03	-0.08	-0.07	0	-0.04	-0.1	-0.08	-0.02	-0.01	0.04	0.09	-0.09
AMELX	-0.08	0	0.07	0.07	0	0.08	-0.09	0.06	0.04	-0.05	-0.05	-0.06	0.05	0.18	-0.02	0.1	0.01	0.15	0.06	-0.11	0.01	0.11	0.08	0.06	0	0.11	0	-0.01	0.09	0.1	0.07	0.08	0.1	0.07	0.09	0.07	-0.06	-0.1	0.16	0.1	-0.05	0.1	0.12	0.04	0.09	0.03	0.09	-0.04	0
AMELY	0.04	-0.02	-0.01	0.04	-0.01	0.03	0.02	-0.02	0.02	0.01	0.03	-0.02	0.02	0.05	-0.04	0.02	0.01	0.18	0.01	-0.06	-0.04	0.06	0	0.04	0.09	0.06	-0.01	-0.03	-0.02	0.05	0.01	0.01	-0.02	0.03	0.01	-0.03	0.04	-0.07	0.11	0	-0.05	0.04	0.03	-0.06	-0.07	-0.02	0.12	0.11	0.02
AMER1	-0.08	0.06	0.11	0.18	-0.01	0.14	-0.21	0.18	0.07	0	0.04	0.04	0.22	0.18	0.08	0.24	0.05	0.12	0.13	-0.01	-0.02	0.21	0.21	0.16	0.09	0.22	0.12	0.01	0.14	0.21	0.14	0.18	0.26	0.21	0.19	0.06	-0.02	0.09	0.24	0.14	-0.08	0.08	0.23	0.1	0.13	0.02	0.17	0.02	0.09
AMER2	0.07	0.17	0.14	0.16	0	0.13	-0.13	0.11	0.17	0.07	0.06	0.03	0.15	0.25	0.04	0.21	0.02	0.18	0.09	0.04	-0.08	0.11	0.13	0.08	0.08	0.04	0.02	0.02	0.08	0.09	0.12	0.19	-0.09	0.12	0.1	0.09	-0.07	0.06	0.28	0.17	0	0.1	0.2	0.06	0.09	-0.07	0.18	0.09	0.04
AMER3	0.05	0.07	0.11	0.17	-0.05	0.12	-0.13	0.18	0.14	0.06	0.08	0.03	0.12	0.17	0.02	0.19	0.05	0.15	0.06	-0.05	-0.16	0.17	0.11	0.12	0.1	0.1	0.04	0.02	0	0.11	0.1	0.16	-0.03	0.09	0.14	0.06	-0.05	-0.03	0.3	0.17	-0.01	0.11	0.18	0.08	0.1	-0.05	0.2	0.01	0.02
AMFR	-0.02	-0.01	-0.07	-0.04	0.06	0.01	0	-0.03	-0.1	-0.02	0.04	0.03	-0.08	-0.08	-0.02	-0.05	-0.04	-0.07	-0.09	-0.13	0.12	-0.01	-0.06	-0.04	0.01	-0.01	-0.06	0	0	0.02	-0.02	-0.06	0.03	-0.08	-0.05	-0.05	0.07	0.11	-0.13	-0.13	0.02	-0.05	-0.04	-0.05	-0.05	0.04	-0.1	0	0
AMH	0.11	0.09	0.16	0.19	-0.02	0.16	-0.13	0.11	0.11	0	-0.03	0.04	0.2	0.14	0.08	0.17	-0.06	0.18	0.16	-0.09	0.05	0.16	0.22	0.18	0.04	0.06	0.07	0	0.09	0.13	0.12	0.15	0.3	0.18	0.17	0.1	-0.03	-0.03	0.22	0.17	-0.01	0.04	0.23	0.1	0.09	-0.06	0.17	0.07	0.07
AMHR2	0.11	-0.04	0.04	0	0.01	0.03	0.08	0.01	-0.04	0.03	-0.01	-0.04	0.02	0	0	0.03	-0.03	-0.03	-0.08	0.03	-0.06	0.02	0	0.01	0.07	-0.02	-0.05	-0.04	0.06	-0.01	0.09	0.03	0.03	-0.05	0.03	-0.04	0.07	0.05	0.06	0.02	0.05	0.05	0	0.01	-0.01	0	0	0.11	-0.12
AMICA1	-0.05	0.07	0.14	0.22	0	0.19	-0.03	0.17	0.19	0.04	0.03	0.01	0.23	0.21	0.09	0.24	0.01	0.24	0.19	-0.07	0.06	0.18	0.23	0.18	0.15	0.11	0.14	0.11	0.12	0.23	0.18	0.23	0.06	0.22	0.27	0.18	-0.07	0.01	0.25	0.16	0	0.12	0.25	0.11	0.17	0.06	0.23	-0.04	0.09
AMIGO2	-0.04	-0.18	-0.16	-0.28	0.09	-0.24	0.19	-0.21	-0.2	-0.02	-0.04	0.02	-0.25	-0.39	-0.17	-0.39	-0.01	-0.38	-0.2	-0.02	-0.07	-0.24	-0.26	-0.24	-0.1	-0.14	-0.16	-0.11	-0.16	-0.27	-0.25	-0.25	-0.29	-0.25	-0.28	-0.3	0.05	-0.03	-0.41	-0.24	0.06	-0.16	-0.4	-0.17	-0.27	0.05	-0.37	0	-0.01
AMIGO3	0.12	0.12	0.17	0.14	-0.06	0.17	-0.25	0.11	0.11	-0.02	0.03	0.03	0.12	0.22	0.11	0.2	0.04	0.17	0.14	-0.1	0.08	0.15	0.17	0.1	0.09	0.1	0.06	0.12	0.16	0.15	0.14	0.13	0.12	0.14	0.16	0.1	-0.06	0.07	0.17	0.12	-0.02	0.08	0.18	0.07	0.13	0.06	0.19	0.14	0.03
AMMECR1	-0.09	-0.01	0	0.04	-0.04	0	-0.11	0.01	0.04	-0.02	0.09	-0.06	0.03	0.08	0.05	0.01	-0.03	-0.04	-0.03	0.1	-0.02	-0.04	-0.03	0	-0.05	-0.02	-0.02	0.01	0.02	0.03	0.02	0.01	0.08	-0.07	0.01	-0.01	0.07	0.17	0.04	-0.04	0.04	-0.02	0.04	0.07	-0.03	-0.01	-0.08	-0.02	0
AMMECR1L	0.02	-0.04	-0.05	-0.05	0.04	-0.04	0.11	-0.03	-0.04	-0.02	-0.01	-0.07	-0.03	0.06	-0.05	-0.07	-0.02	-0.07	-0.01	-0.01	0.01	-0.06	-0.01	-0.07	-0.06	-0.02	0.04	-0.06	-0.04	-0.06	-0.06	-0.01	-0.23	-0.03	-0.06	-0.03	-0.09	0.09	0	0.02	-0.03	-0.04	0	-0.07	-0.06	-0.04	0	0	0.02
AMN	0.05	0.01	0.05	0.1	0.01	0.11	-0.09	0.02	0.01	0.01	0.13	0.01	0.14	0.13	-0.01	0.12	0.02	0.14	0.01	0.04	-0.07	0.09	0.07	0.09	-0.01	0.09	0.09	-0.01	0.03	0.13	0.08	0.08	0.06	0.13	0.1	0.04	-0.03	-0.09	0.17	0.11	0.07	0.02	0.15	0.03	0.12	-0.01	0.17	0.03	0.1
AMN1	-0.04	0.05	0.07	0.05	0.07	0.02	0.06	0.01	0.07	0.02	-0.08	-0.06	0.05	0.02	0	0.02	0	0.06	-0.01	0	-0.02	0.08	0.02	0	0	0.03	0.01	-0.04	0.01	-0.09	-0.05	0.01	0.08	0.02	0.04	0.04	-0.13	0.01	0.12	0.01	0	0.03	0.06	0.12	0.03	-0.12	0.05	-0.14	0.03
AMOT	-0.04	0.02	-0.02	-0.18	-0.02	-0.01	0	-0.07	0.03	0.01	-0.03	-0.02	-0.1	-0.22	-0.05	-0.13	-0.03	-0.16	-0.01	0.1	-0.07	-0.04	-0.05	-0.09	-0.08	-0.09	-0.03	0.06	-0.1	-0.17	-0.15	-0.09	0.06	-0.09	-0.18	0.02	0.05	-0.02	-0.2	-0.07	0.02	-0.09	-0.18	-0.08	-0.04	-0.06	-0.02	-0.05	-0.08
AMOTL1	0.02	-0.05	-0.03	-0.05	-0.01	-0.06	-0.02	-0.03	-0.04	0.03	0.02	0.02	-0.12	-0.1	0.02	-0.05	0	-0.1	-0.09	0.02	-0.06	-0.09	-0.08	-0.11	-0.08	-0.13	0	0	-0.11	-0.13	-0.08	-0.06	-0.04	-0.11	-0.12	-0.05	0.01	-0.08	-0.14	-0.01	-0.05	-0.08	-0.16	-0.03	-0.15	-0.01	-0.07	0.07	-0.02
AMOTL2	0.02	-0.18	-0.16	-0.33	0.11	-0.26	0.24	-0.29	-0.29	-0.02	0.01	0	-0.36	-0.45	-0.13	-0.47	-0.14	-0.42	-0.32	0	-0.05	-0.34	-0.38	-0.3	-0.16	-0.28	-0.23	-0.04	-0.2	-0.31	-0.29	-0.32	-0.28	-0.4	-0.34	-0.32	0.1	0	-0.57	-0.29	0.04	-0.21	-0.48	-0.2	-0.28	-0.02	-0.42	0.05	-0.04
AMPD1	-0.02	0.03	0.07	0.06	0	0.12	-0.03	0.1	0.04	-0.01	0.02	0.02	0.07	0.21	0.04	0.11	-0.05	0.22	0.04	-0.03	0.01	0.05	0.03	0.07	0.06	0.01	0.03	0.04	0.04	0.09	0.13	0.1	-0.01	0.06	0.13	0.05	-0.08	0	0.17	0.09	0.02	0.05	0.14	0.04	0.08	0.01	0.14	0.01	0.02
AMPD2	0.02	-0.02	0.16	0.07	-0.01	0.06	-0.11	0.1	0.03	0.05	-0.23	-0.01	0.08	0.09	0.08	0.02	-0.03	0.04	0.2	-0.2	0.1	0.02	0.15	0.05	0.01	0.08	0.14	0.08	0.06	0.11	0.01	0.09	0.07	0.08	0.08	-0.02	-0.1	0.03	-0.01	0.08	0.06	0.05	0.12	0	-0.02	-0.03	0.07	-0.05	-0.03
AMPD3	0	0.01	0.09	0	-0.03	0.03	-0.08	0.12	0.09	0.04	0.1	0.03	0.07	-0.04	0.01	0.11	0.1	0.08	-0.01	0	0.01	0.06	-0.01	0.03	0.01	-0.04	0	-0.05	-0.01	0.06	0.01	0.05	0.06	0.04	0.05	0.04	-0.05	-0.06	0.04	0	-0.04	0	-0.01	-0.03	0.03	0.08	0.04	0.06	0.03
AMPH	0.11	0.06	0.09	-0.05	0	-0.03	-0.11	0.04	0.01	0.04	-0.24	-0.02	-0.06	-0.07	0.04	0.01	0	-0.09	0.14	-0.15	-0.08	-0.01	0.11	-0.06	-0.03	0.1	0.15	0.07	0.01	-0.07	0.01	0.03	-0.29	0.01	-0.04	0.03	-0.04	0.01	-0.11	0.1	0	0.02	0.02	-0.02	-0.04	-0.08	0.13	0.02	-0.13
AMT	0.07	0.06	0.1	0.08	0.08	0.12	-0.07	0.05	0.06	0.01	0.12	0.07	0.14	0.09	0.05	0.14	0.06	0.15	0.09	-0.04	0.07	0.17	0.11	0.11	0.1	0.08	0.13	0.01	0.11	0.18	0.05	0.12	0.15	0.16	0.14	0.1	0.05	0.02	0.14	0.05	-0.02	0.1	0.11	-0.01	0.11	0.08	0.15	-0.04	0.11
AMY2B	-0.03	0.06	0.19	0.23	0.09	0.14	-0.01	0.25	0.22	0.07	0.13	0.05	0.26	0.25	0.14	0.27	0.07	0.23	0.2	-0.04	0.08	0.23	0.17	0.2	0.15	0.13	0.07	0.08	0.09	0.23	0.09	0.21	0.18	0.25	0.26	0.17	0.02	0.02	0.34	0.15	-0.02	0.19	0.3	0.14	0.13	0.01	0.22	-0.07	0.12
AMZ1	0.04	0.05	0.03	0	0.01	0.03	-0.07	0.01	-0.06	0	0.01	-0.04	0.03	0.07	0.02	0.02	0.01	0.04	-0.02	-0.07	-0.08	-0.01	-0.03	-0.01	0.04	0.01	-0.05	0.03	0.03	0.03	0.03	0.03	0.08	-0.03	0.06	-0.05	0	-0.05	0.04	0.06	0.02	0.06	0.01	-0.02	0.05	0.05	0.01	-0.01	0.02
AMZ2	-0.05	0.02	0.06	-0.07	-0.02	0.01	0.02	-0.06	-0.07	0.07	-0.11	-0.03	-0.06	-0.05	0	-0.06	-0.04	-0.01	-0.05	-0.16	0.12	-0.02	-0.08	-0.12	-0.03	-0.05	-0.05	0.05	-0.05	-0.13	0.01	-0.04	-0.17	-0.12	-0.08	-0.09	-0.05	0.02	-0.02	-0.01	0.07	0	-0.08	-0.04	-0.07	-0.09	-0.06	0.01	-0.02
AMZ2P1	-0.01	0.06	0.07	0.09	-0.01	0.1	0.02	0.03	0.04	0.05	-0.03	0.03	0.08	0.14	0.02	0.16	0	0.15	0.15	-0.1	0.15	0.12	0.15	0.08	0.05	0.15	0.12	-0.01	0.04	0.02	0.09	0.12	-0.05	0.11	0.13	0.14	-0.03	0	0.21	0.08	0.01	0.04	0.19	0.12	0.08	-0.12	0.14	-0.09	-0.02
ANAPC10	0.01	0.04	0.04	0.2	0.03	0.06	-0.02	0.03	0.04	0.03	-0.06	-0.03	0.11	0.09	0.04	0.07	0.02	0.18	0.07	-0.11	0.06	0.04	0.12	0.07	0.11	0.15	0.03	-0.01	0.11	0.14	0.06	0.09	-0.04	0.05	0.17	0.05	-0.07	0.03	0.12	0.08	-0.05	0.09	0.19	0.08	0.09	0.04	0.04	-0.01	0.08
ANAPC11	0	0.01	-0.05	-0.08	0.02	-0.06	0.06	0.04	-0.05	0.04	-0.03	-0.01	-0.09	-0.11	-0.03	-0.09	0	-0.04	-0.13	0.04	-0.03	-0.04	-0.07	-0.1	-0.03	-0.01	-0.07	-0.04	-0.03	-0.13	-0.07	-0.07	-0.06	-0.07	-0.1	-0.11	0.03	-0.07	0.01	-0.05	-0.02	-0.02	-0.06	-0.01	-0.04	-0.06	-0.12	0.03	-0.09
ANAPC13	-0.01	-0.07	-0.05	-0.17	0.02	-0.11	0.13	-0.08	-0.14	0	-0.12	0.01	-0.13	-0.17	-0.05	-0.17	-0.03	-0.14	-0.08	0	-0.02	-0.14	-0.11	-0.15	-0.04	-0.1	-0.05	-0.06	-0.15	-0.19	-0.11	-0.05	-0.28	-0.15	-0.15	-0.12	-0.01	0.11	-0.22	-0.12	-0.02	-0.03	-0.17	-0.09	-0.16	-0.08	-0.11	0.08	-0.1
ANAPC15	0	0	0.06	0.05	-0.01	0.05	-0.07	0.01	-0.02	0.02	0.06	0.01	0.03	-0.03	0.01	0.02	-0.01	0.1	-0.03	-0.07	0.02	-0.06	-0.01	-0.07	-0.01	0.01	-0.01	0.01	0.06	0.03	0.06	-0.01	-0.12	-0.05	0.01	-0.03	-0.08	-0.05	0	0.09	0.03	-0.02	0.04	-0.01	-0.01	-0.06	-0.03	0.07	-0.06
ANAPC16	0.02	0.09	-0.03	0.1	-0.03	0.05	0.02	0.1	0.09	-0.02	0.24	-0.04	0.12	0.08	0.05	0.14	0.02	0.08	0.03	0.13	0.03	0.1	0.02	0.14	0.1	0.07	-0.04	-0.04	0.06	0.16	0.09	0.05	0.15	0.1	0.15	0.12	0.01	-0.05	0.16	0.02	-0.06	0.04	0.14	0.08	0.09	0.01	0.06	0.01	0
ANAPC2	0.03	0.07	0.02	0.11	-0.04	0.07	-0.15	0.01	-0.03	0	0.03	0	0.13	0.08	0.07	0.16	-0.06	0.16	0.09	-0.04	0.05	0.09	0.11	0.1	0.13	0.02	-0.01	0.05	0.1	0.11	0.16	0.09	0.27	0.16	0.12	0.06	-0.07	-0.05	0.17	0.1	0	0.06	0.13	0.05	0.07	0.01	0.06	0.05	0.02
ANAPC4	-0.04	0.12	0.11	0.23	0.06	0.14	0.02	0.12	0.1	0.03	0.03	0.04	0.22	0.19	0.07	0.17	0.14	0.29	0.14	-0.08	0.11	0.17	0.18	0.14	0.15	0.16	0.15	0.05	0.16	0.2	0.12	0.15	0.04	0.21	0.18	0.15	-0.06	-0.05	0.21	0.12	0.04	0.13	0.29	0.1	0.1	0.07	0.17	-0.05	0.11
ANAPC5	-0.09	0.08	0.15	0.26	-0.09	0.16	-0.22	0.18	0.11	0.02	-0.06	-0.01	0.24	0.35	0.09	0.35	0.08	0.28	0.19	-0.04	0.03	0.25	0.28	0.21	0.15	0.2	0.15	0.03	0.23	0.23	0.23	0.2	0.25	0.28	0.2	0.24	-0.05	0.02	0.42	0.16	-0.04	0.13	0.38	0.12	0.21	0.02	0.29	-0.05	0.02
ANAPC7	-0.01	0.09	0.07	0.26	-0.01	0.09	-0.04	0.14	0.1	0.06	0.05	-0.01	0.22	0.19	0.07	0.21	0.06	0.24	0.12	0.06	-0.06	0.16	0.22	0.16	0.14	0.22	0.04	0	0.11	0.1	0.17	0.16	0.19	0.22	0.2	0.15	-0.06	0.06	0.36	0.12	-0.02	0.1	0.28	0.17	0.12	-0.04	0.19	0.03	0.04
ANG	0.01	-0.08	-0.18	-0.17	-0.03	-0.14	0.06	-0.13	-0.17	-0.05	-0.04	0.04	-0.22	-0.16	-0.1	-0.26	-0.08	-0.18	-0.19	0.09	-0.04	-0.17	-0.19	-0.13	-0.09	-0.14	-0.1	-0.14	-0.03	-0.21	-0.14	-0.1	-0.22	-0.2	-0.15	-0.16	0.05	0.1	-0.3	-0.11	0.07	-0.14	-0.21	-0.08	-0.09	0.01	-0.19	0.02	-0.07
ANGEL1	0.01	0.12	0.04	0.22	-0.05	0.18	-0.15	0.16	0.1	-0.02	0.21	0.08	0.24	0.32	0.13	0.27	-0.02	0.26	0.07	0.17	0.11	0.19	0.12	0.22	0.06	0.09	-0.02	0.05	0.13	0.21	0.13	0.16	0.24	0.25	0.23	0.17	-0.02	0	0.35	0.06	0.02	0.14	0.26	0.15	0.19	0.03	0.16	0	0.1
ANGEL2	-0.05	0.11	0.17	0.27	-0.01	0.14	-0.14	0.17	0.17	0.07	0.01	-0.01	0.28	0.18	0.14	0.26	0.11	0.13	0.27	-0.01	0.16	0.24	0.27	0.2	0.08	0.2	0.15	0.08	0.12	0.23	0.17	0.24	0.03	0.21	0.22	0.21	-0.04	0.01	0.26	0.16	-0.06	0.14	0.32	0.14	0.13	-0.05	0.19	-0.08	0.17
ANGPT1	0.04	-0.02	0.02	-0.02	0.08	-0.03	0.07	-0.03	-0.04	-0.05	-0.23	0.02	-0.02	0	0.02	-0.03	0.05	-0.05	0.09	-0.21	0.08	-0.08	0.08	-0.11	-0.04	0.12	0.13	0	0.02	0.01	0	0.04	0.01	-0.05	-0.02	0	0.06	0	-0.13	0.03	-0.05	0.02	-0.03	-0.01	-0.05	0.06	0	-0.04	0
ANGPT2	0.07	0.1	0.1	0.09	0	0.17	-0.09	0.14	0.14	0	0.02	-0.04	0.12	0.26	0.03	0.22	0.07	0.3	0.11	-0.03	0.02	0.15	0.13	0.08	0.05	0.11	0.08	0.06	0.08	0.14	0.13	0.2	-0.02	0.13	0.13	0.13	-0.04	0.03	0.32	0.17	-0.03	0.1	0.18	0.06	0.1	0.03	0.21	-0.02	-0.02
ANGPT4	0.09	0.02	0	0.07	0.03	0.05	0.06	0.01	0.04	-0.02	0.01	-0.06	0.04	0.11	-0.01	0.02	-0.01	0.13	0.05	-0.02	-0.05	-0.01	0.01	-0.02	0.05	0.06	-0.05	0.03	0.04	0.02	0.06	0.07	0.05	0.03	0.04	0.02	0.02	0.08	0.09	0.11	0	0.04	0.09	-0.02	0.04	-0.01	0.05	0.07	0.02
ANGPTL1	0.06	0.06	0.07	-0.01	-0.01	0.13	-0.04	-0.04	0	0.02	-0.01	0.02	0.06	0.07	0.01	0.11	0	0.06	0.06	-0.07	0.02	0.01	0	0.01	0.05	0	0.12	0.1	0.03	0.05	0.13	0.05	0.06	0.02	0.06	0.08	-0.12	-0.02	0.07	0.07	0.01	0.09	0.09	-0.04	0.03	0.01	0.12	-0.05	0.07
ANGPTL2	0.05	-0.01	0.12	-0.04	-0.02	-0.01	-0.03	0.04	0.01	0.06	-0.2	-0.03	-0.01	-0.09	0.02	0.03	0.01	0	0.13	-0.17	0.05	-0.03	0.09	-0.04	-0.01	0.02	0.18	0.07	-0.05	0.04	0.06	0.06	-0.08	-0.02	-0.01	0	0.03	-0.03	-0.04	0.12	0.03	0.06	0	-0.02	-0.01	-0.05	0.09	-0.12	-0.02
ANGPTL3	0.16	0.03	-0.03	0.1	-0.11	0.1	-0.04	0.09	0	0.02	-0.04	-0.07	0.05	0.18	0.01	0.05	0.01	0.14	0	-0.06	-0.08	0.01	0.01	0.05	0.05	-0.05	-0.03	0	0.03	0.04	0.06	0.04	0.06	0.03	0.08	-0.06	-0.09	0.07	0.1	0.05	0.02	0.05	0.08	0	-0.01	-0.01	0.02	0.17	-0.03
ANGPTL4	0.08	0.01	-0.01	-0.13	-0.06	-0.04	0.03	-0.1	-0.14	0.04	-0.06	-0.03	-0.08	-0.13	-0.03	-0.18	0.01	-0.08	-0.11	-0.12	0.09	-0.16	-0.14	-0.13	-0.01	-0.13	-0.05	0.05	-0.09	-0.13	-0.02	-0.1	-0.18	-0.13	-0.16	-0.15	0	0.08	-0.24	0	0.11	-0.08	-0.18	-0.08	-0.03	0.06	-0.16	0.12	0.01
ANGPTL6	0.09	0.11	0.18	0.12	-0.11	0.16	-0.29	0.17	0.12	0.01	0	-0.01	0.15	0.23	0.12	0.22	0.12	0.21	0.15	-0.18	0.1	0.16	0.14	0.12	0.1	0.11	0.05	0.13	0.13	0.2	0.15	0.12	-0.01	0.13	0.15	0.04	0.03	0.14	0.2	0.16	0.01	0.16	0.16	0.05	0.11	0.1	0.19	0.11	0.07
ANGPTL7	0.02	0.03	0.07	0.02	-0.05	0.05	-0.09	0.02	0.05	0.03	0.04	-0.04	0.04	0.09	0.01	0.08	0	0.04	0	-0.08	0.01	0.03	0.03	-0.01	0.11	-0.01	0.01	0.07	0.05	0.04	0.04	0.08	-0.22	0.03	0.1	0.02	0.01	0.01	0.07	0.05	0.02	0.13	0.12	0.02	0.06	-0.02	0.06	0.03	0.03
ANHX	0.07	0.01	0.05	0.01	-0.05	0.07	-0.06	0.07	0	0.03	0.02	-0.01	0.03	0.1	0	0.05	0.01	0.1	0.03	-0.1	0	0.06	0.03	0.03	0.07	0.03	-0.03	0.03	0.01	0.08	0.06	0.09	0.12	0.02	0.09	-0.02	-0.01	0.01	0.06	0.11	0.01	0.07	0.05	0	0.05	0.06	0.04	0.04	0.03
ANK1	0.02	0.04	0.06	0.08	0.09	0.04	-0.01	0.15	0.04	0.01	0.03	-0.01	0.07	0.07	0.01	-0.01	0.07	0.17	0.03	-0.09	-0.03	0.04	0.08	0.01	0.04	0.13	0	0.01	0	0.09	0.09	0.13	-0.1	0.01	0.05	-0.04	0.03	0.01	0.09	0.1	0.03	0.06	0.07	0.04	0.04	-0.06	0.05	0.11	0.03
ANK2	0.01	0.04	0.13	0	0.01	0.03	0.04	0.07	0.1	-0.02	-0.24	-0.04	-0.01	0.01	0.03	0.04	0.01	-0.01	0.05	-0.04	-0.08	0.03	0.11	-0.03	-0.01	0.04	0.1	0.01	-0.01	-0.07	-0.01	0.08	-0.13	-0.04	0	0.05	-0.05	0.04	0.04	0.07	0	0	0.06	0.07	0.04	-0.14	0.07	-0.13	-0.07
ANK3	-0.05	-0.04	-0.21	-0.06	0.09	-0.07	0.29	-0.09	-0.07	-0.05	0.19	-0.02	-0.05	-0.06	-0.07	-0.08	-0.09	-0.08	-0.22	0.36	-0.2	-0.14	-0.21	-0.09	-0.04	-0.13	-0.19	-0.04	-0.15	-0.17	-0.06	-0.1	0.09	-0.09	-0.07	-0.04	-0.02	-0.02	0	-0.08	0.04	-0.1	-0.14	-0.03	-0.11	-0.04	-0.16	0.05	0.02
ANKAR	0	0.11	0.19	0.07	0.01	0.16	-0.24	0.18	0.12	0.01	-0.02	0.05	0.13	0.12	0	0.18	0.03	0.15	0.13	-0.08	0.07	0.15	0.13	0.05	0.08	0.09	0.07	0.03	0.04	0.15	0.11	0.19	-0.01	0.12	0.13	0.13	-0.04	0.02	0.16	0.11	0.01	0.08	0.15	0.06	0.1	0.01	0.23	0.03	0.04
ANKDD1A	-0.01	0.06	0.13	0.11	0.03	0.05	-0.1	0.04	0.08	0.05	-0.12	0.06	0.12	0.07	0.05	0.18	0	0.07	0.13	-0.11	0.1	0.15	0.17	0.1	-0.04	0.13	0.16	0.04	0.1	0.14	0.07	0.08	0	0.12	0.12	0.11	-0.09	-0.05	0.18	0.15	-0.09	0.12	0.15	0.07	0.11	-0.04	0.14	-0.06	0.03
ANKEF1	-0.06	-0.02	-0.17	-0.09	0.01	-0.08	0.11	-0.09	-0.05	-0.06	0.23	0.06	-0.05	-0.05	-0.01	-0.06	-0.08	-0.05	-0.15	0.34	-0.15	-0.06	-0.15	0.04	-0.05	-0.07	-0.18	-0.1	-0.02	-0.12	-0.06	-0.06	0.17	-0.08	-0.02	-0.08	0.05	0.05	0.06	-0.18	-0.02	-0.03	-0.06	0.04	0	-0.02	-0.1	0	-0.08
ANKFN1	-0.04	0.07	0.06	0.08	-0.11	0.07	-0.19	0.08	0.11	-0.03	-0.01	0.03	0.04	0.08	0.09	0.07	0	0.07	0.09	-0.07	0	0.1	0.11	0.06	0.02	0.05	0.01	-0.01	0.04	0.07	0.03	0.13	0	0.06	0.14	0.12	0.04	-0.02	0.03	0.07	-0.03	0.09	0.08	0.07	0.11	0	0.11	0.07	-0.03
ANKFY1	-0.06	0	-0.04	-0.02	0.03	0.05	0.14	-0.04	-0.03	-0.03	-0.03	0.02	0.05	-0.04	0.04	-0.06	-0.06	-0.02	0.09	-0.06	0.11	0.03	0.06	0.03	-0.03	0.02	0.03	0.1	0.01	0.01	-0.03	-0.01	0.02	0.09	-0.05	-0.03	-0.02	0.06	-0.15	0.06	0.03	0.02	0.01	-0.01	-0.03	0.04	-0.01	-0.03	0.1
ANKH	0.11	0.04	-0.05	0	0	0.02	0.01	0.02	0.09	-0.03	-0.01	0	0.01	0.13	-0.07	0.08	0.05	0.07	0.06	0.09	-0.12	0.1	0.04	0.02	-0.09	0	0.08	-0.07	-0.04	0.03	-0.02	0.03	0.05	0.07	0.03	0.16	-0.13	0.14	0.08	0.04	-0.05	-0.02	0.08	0.03	0.05	-0.06	0.17	0.05	-0.03
ANKHD1	-0.01	0.06	0.1	0.18	-0.01	0.09	-0.17	0.18	0.15	0.05	0.19	0.11	0.23	0.17	0.08	0.19	0.05	0.14	0.17	-0.01	-0.03	0.18	0.17	0.21	0.12	0.11	0	0.01	0.1	0.21	0.09	0.17	0.02	0.25	0.19	0.18	0.02	-0.08	0.26	0.1	-0.06	0.14	0.26	0.13	0.12	0.01	0.22	-0.04	0.03
ANKIB1	-0.05	-0.12	-0.09	-0.21	0	-0.16	0	-0.09	-0.09	-0.01	-0.03	0.01	-0.17	-0.23	-0.08	-0.15	0.04	-0.24	-0.06	-0.05	0.01	-0.15	-0.15	-0.14	-0.02	-0.15	-0.07	0.04	-0.18	-0.18	-0.09	-0.14	-0.28	-0.14	-0.22	-0.12	-0.01	-0.11	-0.22	-0.1	-0.02	-0.14	-0.27	-0.14	-0.09	0.01	-0.11	-0.09	-0.03
ANKLE1	0.09	0.15	0.25	0.32	-0.13	0.22	-0.38	0.21	0.23	0.08	-0.07	-0.01	0.32	0.38	0.17	0.39	0.15	0.31	0.24	-0.11	0.08	0.31	0.29	0.26	0.11	0.19	0.2	0.09	0.17	0.34	0.26	0.27	0.41	0.29	0.34	0.25	-0.08	-0.02	0.4	0.3	-0.03	0.2	0.42	0.17	0.24	0.02	0.32	0	0.09
ANKLE2	0.01	0.07	0.11	0.06	-0.01	0	-0.08	0.06	0.04	0.06	0.03	0	0.1	0	0.06	0.07	0.05	0	0.06	-0.06	0.05	0.12	0.07	0.07	0.07	0.1	0.04	0.05	0.03	0.12	0.01	0.02	0.04	0.12	0.03	0.02	-0.06	0.04	0.06	0.02	-0.04	0	0.03	-0.02	0.03	0.08	0	-0.04	0.14
ANKMY1	0.06	0.13	0.06	0.17	0.04	0.16	-0.09	0.15	0.17	0.01	0.15	0.05	0.18	0.19	0.09	0.25	0.06	0.17	0.12	0.02	0.09	0.17	0.13	0.2	0.07	0.12	0.06	0.05	0.08	0.19	0.13	0.12	0.16	0.19	0.16	0.16	0.05	0.05	0.26	0.13	0.05	0.05	0.18	0.08	0.2	0.07	0.17	0.07	0.11
ANKMY2	-0.01	-0.14	-0.06	-0.15	0.04	-0.09	0.1	-0.09	-0.07	-0.03	-0.03	0.04	-0.11	-0.14	0	-0.19	-0.04	-0.14	-0.06	-0.06	0.07	-0.22	-0.06	-0.05	-0.12	-0.08	-0.03	-0.08	-0.09	-0.05	-0.11	-0.07	-0.06	-0.12	-0.08	-0.07	0.07	-0.05	-0.22	-0.17	0.03	-0.09	-0.15	-0.06	-0.11	0.01	-0.1	-0.12	-0.06
ANKRA2	-0.1	0	0.03	-0.01	0.03	0.01	0.01	0.09	0.09	0	0.06	0.01	0.08	-0.02	-0.01	0.06	0.01	0.08	0.07	0	0.05	0.19	0.04	0.13	0.03	0.09	0.09	-0.04	0	0.06	-0.03	0.03	0.01	0.1	0.07	0.08	0.01	-0.08	0.02	-0.03	-0.08	0.02	0.02	0.04	0.03	-0.01	0.08	-0.09	0.09
ANKRD1	0.04	-0.11	-0.04	-0.24	0.06	-0.14	0.21	-0.22	-0.11	-0.02	-0.06	-0.04	-0.23	-0.31	-0.14	-0.28	-0.03	-0.28	-0.2	-0.09	0	-0.18	-0.25	-0.15	-0.05	-0.21	-0.17	-0.05	-0.07	-0.14	-0.16	-0.22	-0.06	-0.27	-0.2	-0.16	0.02	0.09	-0.33	-0.18	0.08	-0.16	-0.29	-0.15	-0.16	0.07	-0.26	0.02	-0.04
ANKRD10	0.01	0.11	0.03	0.07	0.03	0.1	0.01	0.09	0.17	0.05	0.09	-0.02	0.08	0.09	0.02	0.16	0.04	0.08	0.11	0.09	-0.04	0.15	0.06	0.08	0.07	0.12	0.03	-0.01	0.02	0.1	0.01	0.07	0.02	0.14	0.1	0.12	-0.05	0.03	0.18	0.08	-0.05	0.09	0.1	0.01	0.01	0.06	0.15	-0.07	0.03
ANKRD11	-0.09	-0.04	-0.11	0.01	0.06	-0.08	0.27	-0.17	-0.14	-0.04	-0.02	-0.03	-0.03	-0.01	-0.09	-0.08	-0.04	0.02	-0.02	-0.11	-0.1	-0.15	-0.02	-0.04	-0.02	-0.08	0.03	-0.07	-0.01	0.01	-0.03	-0.08	-0.04	-0.03	-0.05	0.02	-0.1	0.13	-0.12	-0.04	0.02	-0.01	0.02	-0.02	-0.08	-0.01	-0.05	-0.06	0.04
ANKRD12	-0.04	0.13	0.08	0.07	0.01	0.11	-0.1	0.11	0.09	0.04	0.08	-0.01	0.08	0.1	0.05	0.17	0.09	0.2	0.12	-0.11	0.11	0.13	0.08	0.02	0.08	0.1	0.1	0.08	0.04	0.11	0.13	0.1	-0.04	0.11	0.1	0.08	-0.04	0.05	0.14	0.16	-0.11	0.11	0.13	0.01	0.07	0.03	0.2	0.08	0.04
ANKRD13A	-0.06	0	0.26	0.02	-0.02	0.07	-0.17	0.14	0.09	0.08	-0.04	-0.01	0.07	-0.01	0.04	0.19	0.05	0.11	0.1	-0.25	0.15	0.18	0.09	-0.02	0.1	0.14	0.07	0.17	-0.01	0.14	0.06	0.06	-0.04	0.06	0.03	0.01	-0.06	-0.04	0.11	0.09	-0.04	0.11	0.02	-0.01	0.01	-0.01	0.13	-0.03	0.01
ANKRD13B	0.01	0.06	0.01	0.22	-0.1	0.13	-0.16	0.11	0.04	0.06	0.06	0.02	0.25	0.22	0.08	0.14	-0.01	0.2	0.13	0.07	-0.08	0.11	0.15	0.21	0.01	0.07	0.08	-0.01	0.04	0.06	0.14	0.17	0.2	0.2	0.15	0.07	-0.07	-0.01	0.26	0.13	0.01	0.02	0.28	0.14	0.14	-0.09	0.14	0.01	0.08
ANKRD13C	-0.08	0.04	0.06	-0.03	0.07	0.01	0.1	0	0.01	0.03	-0.14	-0.05	-0.02	-0.05	0	-0.04	0.04	-0.09	0.04	-0.09	0.11	0.04	0.03	-0.06	0	0.06	0.01	0.03	0.01	0.01	-0.01	0.02	0.05	-0.04	0.05	-0.06	0.08	0.07	-0.06	0	-0.03	-0.03	0	0.03	-0.02	0.03	-0.01	-0.09	-0.05
ANKRD13D	-0.02	0.03	0.03	0.13	0.01	0.14	-0.17	0.13	0.02	0.04	0.15	0.06	0.12	0.15	0.13	0.19	0.03	0.21	0.1	-0.1	0.04	0.2	0.09	0.15	0.06	0.09	0.07	0.06	0.08	0.18	0.07	0.04	0.15	0.17	0.13	0.05	-0.06	-0.06	0.18	0.11	0	0.11	0.13	0.03	0.07	0.14	0.15	-0.1	0.1
ANKRD16	0	0.1	0.03	0.12	-0.04	0.16	-0.14	0.11	0.03	0.05	-0.04	-0.02	0.15	0.2	0.08	0.14	-0.01	0.12	0.1	0	0.07	0.14	0.12	0.13	0.04	0.1	0.02	0	0.1	0.11	0.18	0.12	0.13	0.08	0.13	0.06	-0.06	-0.02	0.2	0.15	0.05	0.03	0.22	0.08	0.15	-0.03	0.09	0	-0.03
ANKRD17	-0.06	0.07	0.08	0.21	0	0.13	-0.08	0.16	0.12	0.05	0.08	-0.02	0.25	0.24	0.09	0.27	0.01	0.2	0.19	0.08	0.06	0.25	0.23	0.22	0.09	0.12	0.13	0.07	0.09	0.21	0.13	0.2	0.25	0.29	0.22	0.17	-0.05	0.06	0.31	0.11	0.02	0.12	0.29	0.14	0.18	0.02	0.19	-0.11	0.08
ANKRD18A	-0.07	0.02	0.02	0.06	-0.02	0.02	0.04	0.01	0.03	0.03	-0.02	0.04	0.02	0.08	0	0.05	0.01	0.1	0.05	-0.03	-0.04	0.05	0.01	0.05	0.05	-0.05	0.02	-0.03	0	0.03	0.03	0.07	0.09	0.02	0.05	0.05	-0.07	-0.04	0.09	0.04	-0.01	0.01	0.11	0.03	-0.01	-0.05	0.07	0	-0.06
ANKRD19P	0.1	0.11	0.04	0.12	0.04	0.05	0.01	0.15	0.08	0.05	0.05	0	0.06	0.16	0.08	0.1	0.07	0.12	0.01	0	-0.01	0.07	0.06	0.03	0.03	0.1	-0.01	-0.02	0.07	0.1	0.06	0.1	0.09	0.03	0.1	0.05	0.07	0	0.15	0.15	-0.04	0.07	0.12	0.03	0.06	0.06	0.08	0.06	-0.02
ANKRD2	0.01	-0.06	-0.09	-0.09	0.01	-0.07	0.14	-0.07	-0.11	-0.02	0.16	-0.01	-0.13	-0.11	-0.03	-0.16	-0.11	-0.06	-0.21	0.02	-0.11	-0.18	-0.22	-0.1	0.01	-0.24	-0.23	-0.06	-0.06	-0.09	-0.08	-0.1	-0.15	-0.22	-0.07	-0.2	-0.03	0.03	-0.11	-0.13	0.1	0	-0.14	-0.07	-0.08	0.02	-0.21	0.11	-0.05
ANKRD22	-0.08	-0.05	-0.17	0.05	0.02	-0.01	0.11	-0.08	-0.03	-0.02	0.37	0.04	0.03	0.02	-0.04	0	0.02	0.07	-0.15	0.27	-0.13	-0.04	-0.14	0.05	0.04	-0.11	-0.19	-0.06	-0.05	0.02	-0.03	-0.05	0.04	0.03	0.01	-0.02	0.1	-0.1	0.03	-0.07	0.01	-0.02	-0.04	-0.06	-0.03	0.11	-0.08	0.04	0.09
ANKRD23	-0.03	0.15	0.09	0.23	-0.06	0.18	-0.14	0.21	0.16	0.02	0.07	0.04	0.22	0.28	0.11	0.29	-0.02	0.21	0.14	0.04	0.03	0.18	0.19	0.21	0.08	0.15	0.1	0.03	0.15	0.18	0.18	0.19	0.27	0.23	0.24	0.19	0.03	0.07	0.38	0.15	0	0.15	0.33	0.16	0.16	-0.01	0.24	-0.01	0.02
ANKRD24	0.11	0.13	0.07	0.17	-0.04	0.13	-0.1	0.16	0.11	0.03	0.07	0.02	0.18	0.17	0.11	0.2	0.03	0.2	0.1	-0.04	-0.13	0.13	0.14	0.17	0.13	0.05	0.04	0.08	0.11	0.18	0.17	0.14	0.14	0.12	0.22	0.06	-0.08	0.03	0.25	0.16	0	0.14	0.21	0.07	0.12	0.04	0.14	0.1	0.05
ANKRD26	-0.02	0.06	0.18	0.07	0.05	0.12	-0.04	0.11	0.06	0.06	-0.09	0.02	0.15	0.08	0.09	0.14	0.08	0.12	0.17	-0.21	0.22	0.1	0.19	0.05	0.1	0.11	0.13	0.1	0.09	0.15	0.22	0.11	0.03	0.12	0.12	0.1	-0.06	-0.05	0.13	0.1	-0.04	0.12	0.17	0.08	0.08	-0.02	0.16	-0.09	0.01
ANKRD26P3	0.03	0.06	0.12	0.14	0.02	0.13	-0.07	0.09	0.03	0.04	-0.01	-0.04	0.11	0.21	0.05	0.14	0.09	0.16	0.11	-0.08	0.06	0.11	0.13	0.07	0.06	0.08	0.09	0.07	0.08	0.14	0.11	0.15	-0.06	0.1	0.15	0.1	0	0.04	0.15	0.16	0.01	0.09	0.17	0.04	0.12	0	0.14	0.04	0.09
ANKRD27	-0.01	0.04	0.04	0.13	0.01	0.11	-0.15	0.1	0.11	0.03	0.17	0.01	0.18	0.21	0.06	0.2	0.04	0.16	0.11	0.04	0.07	0.07	0.16	0.17	0.11	0.14	0	-0.03	0.15	0.21	0.08	0.13	0.28	0.17	0.18	0.13	0.01	-0.06	0.27	0.06	-0.01	0.09	0.2	0.05	0.13	0.08	0.06	-0.09	0.04
ANKRD28	-0.02	0	0.12	-0.01	-0.02	0.04	-0.1	-0.02	-0.01	-0.04	-0.19	-0.02	-0.04	0.04	-0.04	0.05	0.06	0.02	0.09	-0.23	0.16	0.02	0.08	-0.04	0.04	0.03	0.13	-0.02	0.06	0.05	0.01	0.03	0.01	-0.01	-0.03	0.07	-0.08	0.05	-0.06	0.05	-0.01	0.02	0.04	-0.04	0	0.03	0.1	-0.16	-0.05
ANKRD29	-0.09	-0.12	-0.16	-0.2	-0.01	-0.16	0.04	-0.11	-0.08	0	-0.03	-0.05	-0.19	-0.28	-0.06	-0.31	-0.07	-0.21	-0.16	0.09	-0.06	-0.24	-0.25	-0.19	-0.07	-0.18	-0.14	0.01	-0.16	-0.2	-0.09	-0.22	-0.06	-0.25	-0.19	-0.19	0.04	-0.04	-0.35	-0.18	0.07	-0.12	-0.32	-0.12	-0.16	-0.02	-0.26	0.02	0.04
ANKRD30A	0.02	0.08	0.06	0.04	-0.04	0.1	-0.04	0.07	0.01	0.09	0.06	0.04	0.1	0.07	0.05	0.11	0.02	0.09	0.11	0	-0.02	0.13	0.1	0.06	0.09	0.15	0.05	0.05	-0.01	0.04	0.08	0.12	0.09	0.06	0.09	0.05	0.06	-0.08	0.1	0.06	-0.04	0.09	0.1	0.06	0.11	0.02	0.08	0.04	0.07
ANKRD30B	0.1	-0.04	-0.05	-0.17	-0.14	-0.05	-0.22	-0.07	-0.06	-0.03	-0.12	-0.06	-0.13	-0.03	0.01	-0.06	-0.06	-0.07	0	-0.14	-0.12	-0.05	-0.05	-0.05	-0.04	0.08	0	-0.01	-0.1	-0.11	-0.02	-0.04	0.06	-0.09	-0.09	0	0.02	0.09	-0.09	-0.02	-0.06	-0.02	-0.14	-0.05	-0.05	0.01	0.05	-0.02	-0.11
ANKRD30BL	-0.06	0	0.01	0.08	-0.05	0.04	0.07	-0.05	0.02	-0.02	0.11	-0.05	0.09	0.14	-0.04	0.06	-0.03	0.07	0.01	-0.01	0.02	-0.05	-0.02	0.04	0.11	-0.02	-0.08	0.02	0.06	0.05	0.07	0.07	-0.12	0.03	0.02	-0.04	-0.09	0.04	0.08	0.03	0.02	-0.01	0.08	-0.04	-0.01	-0.01	-0.02	-0.01	0.06
ANKRD30BP3	0.02	-0.05	-0.04	-0.02	-0.02	0.03	0.01	-0.04	-0.08	-0.02	0.05	-0.04	-0.04	0.05	-0.01	-0.02	-0.01	0.03	-0.06	0.01	-0.11	-0.04	-0.05	-0.04	0.02	-0.06	-0.06	0.04	-0.03	-0.03	0.09	-0.04	-0.12	-0.05	0	-0.03	-0.01	-0.02	0.02	-0.05	0	0.04	-0.04	-0.01	-0.02	0.02	-0.02	-0.01	-0.04
ANKRD31	0.01	0.01	0.04	0.07	0.02	0.07	-0.06	0.08	0.03	-0.04	0.14	0.01	0.08	0.15	0.03	0.07	-0.03	0.07	0.02	0.04	0.06	0.06	0	0.09	0.05	-0.09	-0.05	0.05	0.07	0.13	0.12	0.05	0.02	0.1	0.06	0.08	-0.09	-0.04	0.14	0.03	0.03	0.01	0.09	0.05	0.04	0.04	0.05	0	0.07
ANKRD32	-0.04	0.09	0.07	0.16	0.06	0.08	-0.08	0.14	0.06	0.09	-0.02	0.02	0.17	0.15	0.08	0.06	0.12	0.15	0.15	-0.1	0.03	0.15	0.13	0.08	0.08	0.01	0.06	0.11	0.11	0.13	0.09	0.1	0.11	0.15	0.12	0.1	-0.07	-0.07	0.12	0.15	0.02	0.09	0.2	0.12	0.08	0.03	0.06	-0.02	0.06
ANKRD33	-0.08	0.05	0.08	0.09	-0.03	0.13	-0.07	0.03	0.05	0.07	0.03	0.03	0.12	0.14	0.04	0.13	-0.03	0.14	0.01	-0.06	-0.11	0.11	0.09	0.09	0.03	0.09	0.01	0.01	0.1	0.08	0.04	0.13	0.02	0.08	0.12	0.03	-0.02	-0.01	0.22	0.05	-0.01	0.09	0.12	0.03	0.07	-0.03	0.1	-0.08	0.04
ANKRD33B	-0.02	-0.02	0.15	0.05	0.03	-0.01	-0.06	0.04	0.07	0	-0.02	-0.05	0.07	-0.05	0.06	-0.02	-0.04	0	0.03	-0.19	0.11	0	-0.02	-0.02	-0.01	0.02	-0.05	0.05	0.02	0.13	-0.02	0.02	-0.12	-0.05	0.04	-0.07	-0.06	-0.01	-0.1	-0.03	0	0.08	0.05	-0.01	0.01	0.03	-0.06	0.07	0.09
ANKRD34A	0.05	0.06	0.1	0.05	-0.01	0.06	-0.08	0.03	-0.05	0	-0.11	0.03	0.07	0.17	0.02	0.07	0.04	0.16	0.08	-0.16	0.06	0.1	0.08	0.05	0.07	0.12	0.08	0.08	0	0.01	0.14	0.1	0.14	0.05	0.1	0.05	-0.06	0.17	0.08	0.14	-0.04	0.06	0.09	0.06	0	-0.03	0.1	0.15	0.03
ANKRD34C	-0.07	0.08	0.16	0.14	-0.03	0.16	-0.18	0.2	0.15	0.01	-0.01	-0.02	0.2	0.19	0.06	0.25	0.02	0.26	0.17	-0.13	0.1	0.17	0.2	0.15	0.05	0.11	0.13	0.07	0.13	0.2	0.13	0.17	0.05	0.18	0.12	0.14	-0.01	0	0.24	0.13	-0.04	0.1	0.22	0.09	0.09	-0.07	0.22	-0.1	0.08
ANKRD35	0.04	0.02	0.04	0.06	0.01	0.04	0.02	0.02	0.03	-0.01	0.05	0.05	0.04	0.03	0.04	0.04	0.06	0.11	0	-0.06	-0.08	0.03	0.04	0.01	0.03	-0.07	0.05	-0.03	0.02	0.04	0.03	0.04	0.04	0.05	0.02	0	-0.02	0.01	-0.02	0.05	0.01	0.02	0.03	0	0.02	0.08	0.08	0.06	-0.02
ANKRD36BP2	0.04	0.09	0.21	0.07	-0.02	0.06	-0.16	0.06	0.12	-0.02	-0.02	-0.02	0.12	0.12	0.03	0.15	0.01	0	0.13	-0.08	0.04	0.15	0.12	0.08	0.06	0.16	0.06	0.07	0.08	0.14	0.09	0.14	-0.04	0.11	0.12	0.11	-0.09	0	0.13	0.09	-0.01	0.06	0.16	0.02	0.09	0.04	0.16	0.04	0.05
ANKRD37	-0.03	0.05	0.06	-0.05	-0.03	0.01	-0.13	0.01	0.01	-0.06	-0.15	-0.04	-0.05	-0.01	-0.01	0.03	0.03	0	0.04	-0.12	-0.01	0.06	-0.01	-0.1	0.03	0.03	0.09	0.1	-0.02	-0.01	0.03	0.01	-0.11	-0.08	-0.02	-0.02	-0.15	0.04	-0.03	0.12	-0.06	0	-0.01	-0.05	-0.01	0	0.09	0.03	-0.03
ANKRD39	-0.01	0.03	-0.07	0.04	-0.08	0.01	-0.08	-0.01	-0.03	-0.03	-0.11	0.01	-0.08	0.11	-0.03	-0.02	-0.05	0.02	-0.04	0.01	-0.03	-0.05	-0.07	-0.03	-0.03	-0.02	0	-0.02	0.04	-0.05	0.02	-0.04	0.05	-0.07	0.03	0.03	0.01	0.02	0.07	0.04	0.05	-0.02	0.08	0.05	0.02	0	0.06	-0.01	-0.09
ANKRD40	0.03	0.05	0.06	0.03	-0.02	0.02	-0.09	0.01	-0.01	0.07	-0.1	-0.06	-0.02	-0.03	-0.04	0.02	0.03	0	0.04	-0.11	0.1	0.04	0.03	0	0	0.04	0.04	-0.02	0.01	-0.02	0	0.04	0	0.01	-0.03	0.08	-0.02	0.05	0.09	0.03	0.03	-0.03	0.07	0.05	0.03	-0.04	0.04	-0.04	0.03
ANKRD44	0.08	0.12	0.21	0.17	-0.07	0.17	-0.19	0.23	0.24	0.02	-0.2	-0.04	0.14	0.24	0.1	0.28	0.05	0.17	0.31	-0.23	0.08	0.23	0.26	0.11	0.14	0.13	0.22	0.14	0.07	0.23	0.17	0.21	-0.01	0.17	0.16	0.2	-0.12	-0.02	0.23	0.25	-0.06	0.18	0.26	0.11	0.1	-0.03	0.31	-0.01	-0.05
ANKRD45	-0.04	0.02	0.02	0.08	-0.09	0.11	-0.06	0	0.02	0	-0.12	-0.1	0.04	0.06	0.02	0.06	0.03	0.07	0.08	-0.04	-0.03	0	0.09	0.03	0.01	-0.02	0.03	0.04	0.05	0.06	0.06	0.08	0.08	0.07	0.08	0.07	0.11	0.13	0.08	0.02	0.01	0.06	0.12	0.02	0	0.01	0.03	-0.01	-0.01
ANKRD46	0.04	0.16	0.15	0.2	-0.02	0.2	-0.2	0.21	0.27	0.08	0.12	0.01	0.27	0.36	0.14	0.39	-0.04	0.21	0.18	0.13	-0.05	0.28	0.25	0.24	0.09	0.25	0.18	0.02	0.1	0.22	0.22	0.25	0.3	0.28	0.3	0.28	-0.11	0.01	0.46	0.17	-0.1	0.17	0.34	0.18	0.25	-0.07	0.36	-0.09	0.01
ANKRD49	-0.03	0.11	0.13	0.19	-0.01	0.19	-0.14	0.17	0.19	0.07	0.23	0.03	0.23	0.25	0.09	0.31	0.05	0.29	0.09	0.02	0.02	0.17	0.16	0.21	0.15	0.11	0.05	0.01	0.12	0.2	0.15	0.18	0.21	0.21	0.26	0.14	-0.04	0.07	0.37	0.15	-0.04	0.13	0.25	0.1	0.18	0.04	0.22	0.04	0.05
ANKRD50	0.05	-0.02	-0.07	-0.06	0.07	-0.03	0.09	-0.05	-0.08	0.03	-0.11	0.02	-0.1	-0.1	-0.01	-0.13	0	-0.13	0.02	-0.05	0.11	-0.08	0.03	-0.14	-0.06	-0.06	0.03	0.01	-0.06	-0.11	-0.05	-0.04	0.07	-0.05	-0.14	-0.05	0.03	-0.09	-0.19	-0.01	0	-0.06	-0.14	0.01	-0.1	-0.02	-0.15	-0.06	0
ANKRD52	0	-0.06	-0.11	-0.14	-0.01	-0.09	0.02	-0.18	-0.1	-0.01	-0.12	-0.04	-0.16	-0.11	-0.11	-0.21	-0.03	-0.17	-0.08	-0.1	-0.11	-0.17	-0.13	-0.17	-0.07	-0.1	-0.07	0.03	-0.07	-0.21	-0.08	-0.15	-0.17	-0.18	-0.18	-0.16	-0.01	-0.03	-0.2	-0.06	0.08	-0.14	-0.16	-0.14	-0.14	0.02	-0.16	0.03	-0.07
ANKRD53	-0.07	0.06	0.08	0.12	-0.09	0.13	-0.11	0.07	0.02	0.03	0.03	0.02	0.11	0.17	0.04	0.15	-0.02	0.23	0.05	-0.08	0.04	0.12	0.1	0.14	0.08	0.11	0.04	-0.01	0.06	0.12	0.13	0.07	0.18	0.1	0.11	0.06	0.05	-0.1	0.2	0.09	-0.08	0.09	0.12	0.03	0.06	0.04	0.17	-0.13	0.06
ANKRD54	0.07	0.09	-0.02	0.07	-0.1	0.11	-0.09	0.03	0.02	-0.01	-0.14	-0.02	0.02	0.14	0.1	0.09	0	0.09	0.12	-0.14	0.02	0.09	0.12	0	0.03	0.09	0.12	0.08	0.1	0.08	0.08	0.08	0.11	0.05	0.03	0.06	-0.01	0.03	0.03	0.11	0.03	0.07	0.14	0.05	0.03	0	0.11	0	-0.08
ANKRD55	0.04	0	0.07	0.04	-0.08	-0.01	-0.19	-0.03	0.01	-0.03	-0.09	0.03	0.03	0.03	0.01	0.02	-0.02	0.03	0.03	-0.15	0.02	-0.03	0.07	-0.01	0.04	0.04	-0.02	-0.02	0.02	0.01	0	0.02	-0.15	0.03	0	-0.03	-0.02	0.04	0.01	0.04	0.06	0.06	0.05	-0.01	-0.02	0.01	-0.03	0.05	-0.03
ANKRD6	0.01	0.02	-0.03	-0.15	-0.04	-0.09	-0.01	-0.03	0.01	-0.04	-0.05	-0.01	-0.21	0.02	-0.08	-0.12	-0.09	-0.19	-0.13	0.06	-0.04	-0.03	-0.11	-0.11	-0.05	-0.02	-0.14	-0.07	-0.06	-0.2	-0.14	-0.11	-0.2	-0.1	-0.15	-0.09	-0.04	-0.06	-0.06	-0.1	-0.01	-0.02	-0.14	-0.03	-0.08	-0.04	-0.1	-0.12	-0.15
ANKRD60	-0.08	-0.03	-0.05	0	-0.02	0.05	-0.12	0.05	-0.01	0.01	0.06	-0.05	0.01	0.08	-0.02	0.04	0.03	0.04	0.01	-0.07	-0.06	0.04	0	0.05	0.07	0	-0.07	-0.01	0.03	0.04	0.07	0.06	0.2	0.02	0.08	0	0.09	-0.07	0.06	0.03	-0.01	0.09	0.05	0.01	0.04	0.03	-0.02	-0.01	-0.01
ANKRD65	0.02	0.01	-0.02	0.1	0.07	0.04	0.07	0.06	0.03	0	0.21	0.02	0.09	0.12	0.07	0.05	-0.02	0.1	-0.09	0.12	-0.12	0	0	0.03	-0.04	0.01	-0.06	-0.02	-0.03	0	0.01	0.05	0.01	0.04	0.07	-0.01	-0.01	-0.08	0.12	0.01	-0.02	0.1	0.03	0.06	0.04	-0.03	0.05	0.1	0.05
ANKRD7	0.18	0	0.12	0.02	-0.06	0.01	-0.06	0.02	0.08	-0.02	-0.16	-0.07	0.03	0.07	0	0.07	0	0.07	0.13	-0.07	-0.01	0	0.09	-0.03	0.01	0.01	0.08	0.07	-0.04	0.06	0.06	0.09	-0.07	0.01	0	0.03	-0.04	-0.01	0.06	0.06	0.01	0.03	0.05	0.01	0.06	-0.07	0.09	-0.02	-0.02
ANKRD9	-0.05	-0.12	-0.23	-0.2	0.02	-0.17	0.15	-0.25	-0.25	-0.02	-0.03	0.02	-0.24	-0.26	-0.14	-0.3	-0.02	-0.23	-0.2	0.01	-0.01	-0.24	-0.21	-0.2	-0.13	-0.2	-0.12	-0.06	-0.06	-0.22	-0.17	-0.23	-0.24	-0.2	-0.23	-0.15	0.09	0	-0.35	-0.18	0.05	-0.11	-0.31	-0.12	-0.15	0.03	-0.24	-0.05	-0.05
ANKS1A	0.03	-0.01	-0.17	-0.07	-0.01	-0.08	0.08	-0.03	0	0	0.2	0.02	-0.09	0.08	-0.05	0.05	0.02	-0.09	-0.12	0.34	-0.19	-0.06	-0.13	-0.02	-0.05	-0.18	-0.13	-0.08	-0.02	-0.14	-0.1	-0.04	0.07	-0.01	-0.04	0.05	-0.03	0.01	0.07	-0.09	0.01	-0.07	-0.03	-0.05	-0.04	0.07	-0.01	0.02	-0.07
ANKS1B	0.14	0.15	0.13	0	-0.02	0.06	-0.17	0.09	0.11	0.01	-0.14	-0.05	-0.01	0.07	0.05	0.06	0.03	0.08	0.11	-0.11	-0.04	0.04	0.09	-0.03	0.01	0.06	0.09	0.11	0.05	-0.04	0.07	0.09	-0.14	0.03	0.04	0.07	0.02	0.04	0.12	0.11	0.03	0.04	0.08	0.04	0.03	-0.07	0.16	0.08	-0.07
ANKS3	-0.01	0.01	0.09	0	0.07	0	-0.03	-0.01	0.07	0	-0.07	0.03	0	-0.08	0.05	0.01	-0.05	-0.01	0.06	-0.04	-0.1	-0.05	0.01	-0.02	0.02	-0.01	0.02	0.02	0.05	0	-0.01	0.04	-0.21	-0.08	0.01	0.03	0.02	0.02	-0.01	0	0.11	-0.02	0.01	0	0.02	-0.06	-0.01	-0.02	-0.07
ANKS4B	0.03	-0.01	0.01	0	0.03	0.1	0.11	0.03	0.03	0.02	0.09	-0.02	0.07	0.08	-0.09	0.04	0.03	0.04	0.03	0.08	-0.15	0.05	0.02	0.01	0.08	0.06	-0.01	-0.05	0.04	0.02	0.08	0.08	0.15	0.04	0.05	0.06	0.04	0.09	0.16	-0.02	0	0.04	0.09	-0.01	0.07	0.03	0.11	0	-0.03
ANKS6	0.04	-0.05	-0.12	-0.02	-0.05	-0.04	0.06	-0.1	-0.05	-0.03	0.14	0.03	-0.01	-0.01	-0.04	-0.08	-0.06	-0.03	-0.13	0.19	0.04	-0.1	-0.16	0.04	-0.08	-0.13	-0.14	-0.13	0.04	-0.03	-0.1	-0.06	0.06	-0.06	-0.04	-0.06	-0.04	-0.06	0	-0.11	0.06	-0.09	-0.01	0	-0.01	-0.05	-0.18	0.05	0.06
ANKUB1	-0.01	0.07	0.12	0.22	-0.01	0.14	-0.08	0.18	0.04	0.04	0.07	-0.06	0.21	0.18	0.09	0.18	-0.01	0.22	0.13	-0.05	0.06	0.19	0.2	0.15	0.13	0.09	0.07	0.07	0.12	0.25	0.17	0.2	0.14	0.19	0.22	0.06	0.01	-0.12	0.24	0.15	-0.03	0.2	0.24	0.1	0.1	0.02	0.15	-0.13	0.15
ANKZF1	-0.08	0.03	0.1	0.15	-0.01	0.14	-0.06	0.13	0.1	-0.03	0.13	-0.03	0.2	0.2	0.06	0.25	-0.04	0.16	0.13	0.03	-0.01	0.13	0.08	0.16	0.1	0.02	0.06	0.03	0.07	0.23	0.15	0.14	0.16	0.17	0.21	0.06	-0.06	-0.04	0.3	0.12	-0.01	0.04	0.25	0	0.08	0.01	0.12	-0.05	0.11
ANLN	-0.05	-0.16	-0.18	-0.24	0.07	-0.24	0.23	-0.25	-0.26	-0.02	-0.05	0	-0.31	-0.33	-0.12	-0.44	-0.01	-0.31	-0.22	-0.05	-0.04	-0.32	-0.31	-0.28	-0.15	-0.26	-0.18	-0.01	-0.12	-0.2	-0.2	-0.28	-0.09	-0.3	-0.29	-0.25	0.03	-0.04	-0.5	-0.24	0.02	-0.16	-0.39	-0.18	-0.26	0.06	-0.35	0.01	-0.03
ANO1	-0.09	-0.04	-0.23	-0.06	0.05	-0.02	0.09	-0.13	-0.13	-0.08	0.24	-0.02	-0.06	-0.08	-0.03	-0.12	-0.03	0.01	-0.17	0.2	-0.11	-0.15	-0.21	-0.04	-0.06	-0.09	-0.17	-0.03	-0.05	-0.03	-0.04	-0.11	0.11	-0.09	-0.11	-0.06	0.02	0.01	-0.13	-0.04	0.01	-0.08	-0.17	-0.09	-0.05	0.04	-0.08	0.01	0.1
ANO10	-0.07	-0.15	-0.09	-0.25	-0.01	-0.18	0.12	-0.23	-0.23	-0.05	-0.17	-0.04	-0.35	-0.34	-0.14	-0.33	-0.04	-0.3	-0.17	-0.08	0.02	-0.27	-0.22	-0.28	-0.08	-0.1	-0.07	-0.08	-0.07	-0.29	-0.17	-0.2	-0.28	-0.33	-0.24	-0.22	0.12	-0.05	-0.45	-0.24	0.06	-0.19	-0.38	-0.19	-0.26	-0.01	-0.27	0	-0.15
ANO2	-0.04	-0.05	-0.01	-0.06	0.02	-0.01	0.02	-0.03	-0.05	-0.07	0.05	-0.02	-0.13	0	-0.04	-0.06	-0.06	-0.07	-0.12	0.07	-0.13	-0.11	-0.13	-0.02	-0.03	-0.21	-0.1	-0.01	-0.06	-0.09	-0.02	-0.06	-0.28	-0.1	-0.07	-0.02	0.04	0.03	-0.04	-0.07	-0.01	-0.03	-0.13	-0.07	-0.01	-0.04	-0.02	-0.01	-0.02
ANO3	-0.04	0.06	0.04	0.08	0.01	0.03	0.03	0.05	0.06	0.02	-0.05	0.07	0.03	0.08	0	0.05	0.16	0.07	0.05	-0.01	-0.06	0.08	0.11	0	0.06	0.07	0.08	-0.04	0.04	0.07	0.03	0.11	0.22	0.07	0.05	0.03	0.02	-0.04	0.05	0.08	-0.03	0.1	0.09	0.02	0.03	0.02	0.11	-0.06	0
ANO4	-0.01	0.07	0.05	0.03	-0.03	0.04	-0.07	0.05	0.06	-0.02	-0.02	0	0.01	0.06	0	0.08	0.1	0.05	0.03	0.07	-0.04	-0.02	0	-0.03	0.01	0.01	0.08	0.07	0.01	-0.01	0.06	0.07	-0.15	0.03	-0.02	0.04	-0.07	0.11	0.08	0.08	0	0.03	0.06	-0.02	0	-0.01	0.13	0.06	-0.02
ANO5	0.05	0.12	0.12	0.13	-0.05	0.05	-0.09	0.15	0.14	0.06	-0.08	0.06	0.12	0.09	0.02	0.14	0.03	0.05	0.06	0.1	-0.07	0.2	0.17	0.09	0.08	0.08	0.08	0.01	0.07	0.06	0.07	0.15	0.07	0.13	0.13	0.14	-0.05	0.01	0.18	0.12	-0.01	0.06	0.2	0.15	0.15	-0.1	0.16	0.03	0
ANO6	-0.08	-0.09	-0.05	-0.21	0.01	-0.15	0.13	-0.17	-0.12	0.04	-0.02	0.02	-0.13	-0.28	-0.1	-0.22	-0.05	-0.29	-0.07	-0.08	0.02	-0.11	-0.1	-0.07	-0.02	-0.02	-0.03	-0.07	-0.11	-0.11	-0.14	-0.16	-0.17	-0.13	-0.2	-0.1	0.1	0.01	-0.33	-0.17	0.01	-0.15	-0.2	-0.12	-0.08	0.03	-0.21	-0.07	0.01
ANO7	-0.05	-0.02	-0.09	-0.07	-0.02	-0.04	-0.03	-0.1	-0.11	0	-0.03	-0.05	-0.12	0.05	-0.07	-0.05	-0.02	-0.06	-0.08	0.04	-0.09	-0.12	-0.08	-0.1	0.01	-0.07	-0.09	-0.04	0.01	-0.1	0.01	-0.03	-0.03	-0.12	-0.05	-0.08	0.04	0.02	-0.01	-0.09	0.06	-0.07	-0.07	-0.09	-0.04	0.05	-0.1	-0.05	-0.1
ANO8	0.13	0.12	0.01	0.1	0	0.04	-0.02	0.15	0.07	0.07	0.08	0.11	0.11	0.09	0.08	0.08	0.04	0.07	0.06	0.11	-0.03	0.16	0.11	0.09	-0.01	0.12	0.05	0.02	-0.02	0.03	0.06	0.07	0.01	0.17	0.06	0.02	0.05	-0.07	0.11	0.09	0	-0.01	0.07	0.11	0.08	0.03	0.12	0.06	0.06
ANO9	-0.07	-0.04	-0.16	-0.02	0.03	-0.01	0.06	-0.05	-0.07	-0.08	0.3	0.05	-0.04	-0.02	-0.1	-0.02	-0.05	0	-0.18	0.29	-0.19	-0.06	-0.21	0.03	0.01	-0.14	-0.21	-0.07	-0.05	-0.07	-0.08	-0.1	0.1	-0.02	-0.01	-0.05	0.01	-0.06	0.09	-0.12	0.02	-0.07	-0.08	-0.04	0	0.03	-0.02	0.05	0.05
ANP32A	0	0.15	0.17	0.44	0.02	0.24	-0.09	0.23	0.18	0.04	0.07	0.04	0.44	0.34	0.18	0.38	0.02	0.37	0.25	0.05	0.06	0.3	0.37	0.35	0.14	0.24	0.21	0.06	0.21	0.36	0.23	0.29	0.11	0.39	0.39	0.23	-0.06	-0.01	0.48	0.25	0.04	0.25	0.56	0.25	0.24	-0.04	0.27	0	0.12
ANP32A-IT1	-0.05	0.11	0.16	0.3	-0.01	0.19	-0.2	0.26	0.2	0.05	0.09	0.04	0.32	0.33	0.15	0.39	0	0.32	0.26	0.01	0.07	0.33	0.28	0.27	0.17	0.17	0.19	0.07	0.17	0.33	0.21	0.26	0.33	0.34	0.31	0.26	-0.06	-0.08	0.48	0.19	-0.03	0.24	0.41	0.18	0.21	-0.01	0.31	-0.13	0.11
ANP32B	0.01	0.11	0.13	0.43	0.03	0.18	-0.03	0.19	0.14	0.03	0.07	0.01	0.37	0.31	0.16	0.29	0.12	0.33	0.23	-0.04	0.1	0.19	0.31	0.26	0.14	0.11	0.17	-0.03	0.2	0.36	0.2	0.3	0.1	0.31	0.34	0.23	-0.04	-0.11	0.35	0.23	-0.03	0.17	0.46	0.2	0.19	0.01	0.21	-0.02	0.18
ANP32C	-0.04	0.07	0.04	0.15	-0.01	0.09	0.05	0.11	0	0.05	0.01	-0.03	0.14	0.16	0.04	0.12	-0.04	0.2	0.06	-0.02	-0.03	0.04	0.07	0.07	0.04	0.07	0.01	0.03	0.06	0.09	0.12	0.13	0.19	0.06	0.14	0.01	0.01	0.04	0.19	0.09	0.01	0.06	0.18	0.13	0.07	-0.02	0.08	0.07	0.05
ANP32D	0.02	-0.04	0.02	0.07	-0.03	0.05	0.04	0.07	0.02	0.01	-0.07	-0.01	0.06	0.16	0.01	0.05	0.02	0.14	0.05	-0.07	0.04	-0.03	0.05	0	-0.02	0.01	0.04	0	0.04	0.04	0.03	0.07	-0.22	-0.01	0.1	-0.04	-0.04	0.11	0.11	0.11	0.02	0.07	0.1	0.02	-0.01	0.02	0.03	-0.01	0.01
ANP32E	0.06	0.13	0.16	0.36	0.01	0.16	-0.1	0.15	0.09	0.06	-0.02	0.01	0.31	0.3	0.13	0.25	0.11	0.25	0.18	-0.04	0.06	0.18	0.28	0.2	0.12	0.2	0.16	0.03	0.16	0.3	0.2	0.23	0.14	0.26	0.33	0.14	-0.08	0.03	0.3	0.21	0	0.18	0.44	0.2	0.19	0.06	0.18	0.07	0.15
ANPEP	-0.06	-0.07	0.06	-0.01	0.07	-0.02	-0.13	-0.05	-0.07	0.02	-0.08	0	-0.01	-0.11	-0.02	-0.03	0.09	-0.02	0.08	-0.11	0	-0.05	0.05	-0.05	0	0.04	0.09	-0.03	0	0.09	-0.02	0.01	-0.08	-0.02	-0.05	-0.04	0	-0.03	-0.12	0	-0.04	-0.02	-0.02	-0.1	-0.04	0.06	0	-0.13	0.02
ANTXR1	0.06	-0.11	-0.05	-0.17	0	-0.17	0.08	-0.19	-0.14	0.01	-0.25	-0.03	-0.2	-0.2	-0.06	-0.26	-0.03	-0.27	-0.05	-0.17	0.03	-0.23	-0.1	-0.21	-0.14	-0.12	0.03	0.03	-0.12	-0.2	-0.15	-0.18	-0.25	-0.17	-0.24	-0.19	-0.07	-0.02	-0.38	-0.05	0.05	-0.13	-0.22	-0.13	-0.19	-0.07	-0.21	0.07	-0.06
ANTXR2	0.05	-0.07	0.07	-0.02	-0.01	-0.06	-0.02	-0.02	-0.01	0.03	-0.14	-0.02	0.01	-0.14	-0.05	-0.05	0.1	0.03	0.06	-0.11	0.08	0.01	0.04	-0.06	-0.02	0.07	0.11	-0.01	-0.08	0.03	-0.06	-0.01	-0.1	0.02	-0.11	-0.02	-0.03	-0.02	-0.08	-0.01	-0.01	-0.01	-0.09	-0.09	-0.1	0.07	-0.01	0.03	0.08
ANXA1	0.01	-0.15	-0.21	-0.21	0.03	-0.18	0.22	-0.28	-0.29	-0.04	-0.02	0	-0.24	-0.33	-0.1	-0.41	-0.03	-0.29	-0.25	-0.09	0.05	-0.33	-0.29	-0.22	-0.13	-0.26	-0.17	-0.09	-0.14	-0.19	-0.21	-0.23	-0.06	-0.26	-0.26	-0.26	0.11	0	-0.51	-0.22	0.07	-0.15	-0.32	-0.18	-0.23	0.06	-0.39	-0.03	0.07
ANXA10	0.01	-0.15	-0.18	-0.1	0.03	-0.14	0.08	-0.09	-0.13	-0.01	-0.07	-0.02	-0.13	-0.17	-0.12	-0.18	0.03	-0.13	-0.11	-0.05	-0.01	-0.18	-0.16	-0.14	-0.03	-0.06	-0.05	-0.08	-0.06	-0.09	-0.08	-0.18	-0.11	-0.14	-0.12	-0.12	-0.08	0.05	-0.21	-0.1	0.06	-0.07	-0.18	-0.12	-0.16	-0.01	-0.22	0.04	0.04
ANXA11	-0.04	-0.11	-0.11	-0.13	-0.04	-0.11	0.05	-0.17	-0.13	-0.06	0.16	0	-0.12	-0.24	-0.08	-0.18	-0.03	-0.12	-0.17	0.03	-0.04	-0.15	-0.25	0.01	-0.01	-0.14	-0.18	-0.08	-0.02	0	-0.09	-0.16	-0.02	-0.14	-0.17	-0.12	0.07	-0.11	-0.26	-0.17	0.04	-0.06	-0.2	-0.14	-0.08	0.08	-0.18	0	-0.01
ANXA13	0.04	-0.07	-0.09	-0.09	-0.06	-0.02	0.09	-0.11	0	-0.05	0.02	-0.02	-0.12	-0.1	-0.07	-0.1	-0.07	-0.12	-0.08	0.07	-0.1	-0.15	-0.11	-0.04	0	-0.15	-0.05	-0.07	-0.07	-0.07	-0.06	-0.11	-0.12	-0.1	-0.06	0.01	0.01	0.03	-0.08	-0.13	0.03	-0.06	-0.12	-0.03	-0.07	-0.03	-0.01	0.06	-0.04
ANXA2	-0.03	-0.21	-0.22	-0.31	0.02	-0.25	0.19	-0.33	-0.29	-0.09	-0.03	-0.02	-0.36	-0.44	-0.18	-0.47	-0.13	-0.38	-0.3	-0.05	0.01	-0.38	-0.41	-0.29	-0.17	-0.31	-0.2	-0.04	-0.19	-0.28	-0.25	-0.35	-0.23	-0.39	-0.38	-0.32	0.03	0	-0.57	-0.28	0.03	-0.21	-0.48	-0.22	-0.27	-0.01	-0.41	0.03	0
ANXA2P1	0.03	-0.21	-0.21	-0.28	0.02	-0.22	0.23	-0.29	-0.27	-0.08	-0.06	-0.01	-0.32	-0.43	-0.16	-0.46	-0.13	-0.33	-0.27	-0.06	-0.04	-0.38	-0.34	-0.27	-0.13	-0.3	-0.14	-0.03	-0.17	-0.24	-0.22	-0.34	-0.15	-0.38	-0.34	-0.32	0.03	0.01	-0.57	-0.23	0.03	-0.2	-0.44	-0.19	-0.24	-0.01	-0.4	0.05	0
ANXA2P2	0	-0.21	-0.21	-0.3	0.03	-0.25	0.23	-0.33	-0.29	-0.08	-0.05	-0.02	-0.33	-0.42	-0.16	-0.45	-0.13	-0.36	-0.28	-0.08	-0.02	-0.38	-0.36	-0.27	-0.16	-0.29	-0.16	-0.03	-0.18	-0.25	-0.23	-0.34	-0.22	-0.38	-0.35	-0.33	0.03	0.01	-0.56	-0.26	0.03	-0.19	-0.46	-0.21	-0.24	-0.01	-0.41	0.04	-0.01
ANXA2P3	0.03	-0.19	-0.15	-0.25	0	-0.22	0.16	-0.23	-0.23	-0.08	-0.02	0.01	-0.28	-0.34	-0.11	-0.38	-0.1	-0.26	-0.23	-0.09	0.06	-0.31	-0.31	-0.23	-0.12	-0.25	-0.15	0	-0.15	-0.18	-0.2	-0.29	-0.07	-0.31	-0.28	-0.27	0.02	0.04	-0.49	-0.2	0.02	-0.14	-0.38	-0.16	-0.2	0.01	-0.35	0.08	0.01
ANXA2R	0.08	0.13	0.14	0.16	0.02	0.08	-0.12	0.2	0.12	0.08	-0.04	0.1	0.19	0.06	0.09	0.18	0.14	0.11	0.21	-0.19	0.16	0.16	0.19	0.1	0.12	0.14	0.13	0.07	0.09	0.21	0.11	0.14	0.08	0.16	0.16	0.11	0.03	-0.01	0.16	0.16	-0.04	0.13	0.23	0.05	0.08	0.13	0.12	-0.04	0.11
ANXA3	0.04	-0.16	-0.22	-0.2	0.07	-0.18	0.23	-0.31	-0.17	-0.08	0.18	-0.04	-0.23	-0.33	-0.18	-0.29	-0.14	-0.27	-0.34	0.2	-0.05	-0.32	-0.36	-0.14	-0.11	-0.27	-0.29	-0.14	-0.07	-0.18	-0.19	-0.26	-0.08	-0.27	-0.2	-0.19	0.06	-0.08	-0.29	-0.27	0.04	-0.2	-0.34	-0.16	-0.16	0.06	-0.34	0	0.01
ANXA4	-0.11	-0.17	-0.22	-0.3	-0.02	-0.17	0.15	-0.21	-0.16	-0.05	0.06	0	-0.3	-0.41	-0.18	-0.37	-0.11	-0.37	-0.31	0.14	-0.14	-0.3	-0.37	-0.16	-0.13	-0.22	-0.24	-0.15	-0.13	-0.3	-0.24	-0.29	-0.09	-0.3	-0.28	-0.22	0.14	-0.04	-0.44	-0.32	0.07	-0.22	-0.43	-0.21	-0.19	0	-0.32	0	-0.08
ANXA5	0.1	-0.12	-0.09	-0.3	-0.01	-0.19	0.12	-0.25	-0.23	-0.07	-0.31	-0.11	-0.36	-0.29	-0.11	-0.34	-0.11	-0.33	-0.14	-0.18	0.04	-0.29	-0.23	-0.34	-0.13	-0.17	-0.02	0.01	-0.11	-0.24	-0.15	-0.26	-0.2	-0.38	-0.28	-0.25	0.02	0.03	-0.47	-0.16	0	-0.12	-0.37	-0.21	-0.22	-0.01	-0.28	0.03	-0.15
ANXA6	0.05	0.01	0.21	0	0	-0.01	-0.09	0.03	-0.01	-0.01	-0.29	-0.05	-0.01	-0.05	0.05	0.07	-0.02	-0.01	0.21	-0.24	0.15	0.04	0.12	0	0.04	0.05	0.18	0.11	0.03	0.07	0.1	0.04	0	0	0	0.03	-0.01	-0.02	-0.02	0.15	-0.08	0.05	0.05	-0.06	0.03	0	0.14	0.01	-0.07
ANXA7	-0.08	-0.06	-0.13	-0.13	0.02	-0.12	0.04	-0.1	-0.16	-0.03	0.03	-0.04	-0.16	-0.24	-0.12	-0.18	-0.04	-0.12	-0.16	0	0.06	-0.1	-0.16	-0.1	0	-0.01	-0.12	-0.09	-0.02	-0.1	-0.09	-0.12	-0.03	-0.22	-0.11	-0.14	0.16	-0.05	-0.19	-0.15	-0.02	-0.1	-0.18	-0.05	-0.08	0	-0.22	-0.02	-0.04
ANXA9	-0.04	-0.1	-0.19	-0.12	0.03	-0.07	0.09	-0.15	-0.14	-0.08	0.26	0.04	-0.12	-0.11	-0.05	-0.1	-0.08	-0.12	-0.27	0.33	-0.11	-0.16	-0.22	-0.02	-0.02	-0.15	-0.21	-0.13	-0.05	-0.17	-0.1	-0.13	0.03	-0.13	-0.05	-0.07	0.15	-0.01	-0.06	-0.23	0.02	-0.09	-0.21	-0.05	-0.06	0.09	-0.2	-0.01	-0.05
AOAH	0.16	0	0.07	0.09	-0.02	0.11	-0.05	0.1	0.05	0.01	0.07	0.02	0.09	0.14	0.02	0.08	0.04	0.09	0.04	0.04	0	0.03	0.08	0.07	0.05	-0.04	0.07	0	0.1	0.13	0.05	0.06	0.15	0.09	0.11	0.03	0.03	0.08	0.16	0.07	-0.02	0.09	0.11	0.01	0.05	0.05	0.09	0.04	0.02
AOC2	0.04	0.05	0	0.1	0.04	0.02	0.08	0.07	-0.03	-0.06	0.01	-0.07	0.07	0.2	-0.02	0.1	-0.01	0.13	0.01	-0.04	0.09	0.03	0.03	0.05	0.02	-0.02	-0.04	0	0.07	0.08	0.04	0.05	-0.08	0.05	0.11	0.01	-0.04	0.22	0.18	0.03	-0.01	0.11	0.15	0.08	0.02	0.01	-0.03	0.1	0.09
AOC3	-0.02	0.07	0.02	0.12	0.06	0.03	0.11	0.05	-0.01	-0.02	0.05	-0.02	0.07	0.25	-0.02	0.13	0.02	0.19	0	0.02	0.02	0.1	0.03	0.04	0.05	0.08	-0.01	-0.02	0.14	0.08	0.07	0.07	0.03	0.06	0.11	0.06	-0.17	0.26	0.22	0.06	-0.01	0.11	0.17	0.09	0.02	0.03	0	0.05	0.03
AOX1	-0.01	-0.1	0.03	-0.2	0.01	-0.13	0.03	-0.16	-0.15	0.01	-0.16	-0.01	-0.21	-0.31	-0.07	-0.27	-0.01	-0.21	-0.07	-0.23	0.04	-0.22	-0.16	-0.21	-0.04	-0.09	-0.01	0.08	-0.11	-0.14	-0.1	-0.16	-0.26	-0.28	-0.24	-0.21	0.03	-0.02	-0.37	-0.11	0.04	-0.12	-0.31	-0.16	-0.16	0.01	-0.22	-0.02	-0.06
AP1AR	-0.12	0.07	-0.04	0.16	0.01	0.08	0.07	0.04	0.05	-0.06	0.08	-0.05	0.12	0.2	-0.01	0.19	0.03	0.16	0.07	0.13	-0.05	0.07	0.1	0.11	0.07	0.07	-0.02	-0.07	0.13	0.1	0.08	0.13	0.21	0.15	0.16	0.16	-0.1	0.1	0.31	0.07	-0.05	0.03	0.19	0.13	0.11	0.03	0.15	-0.1	0.03
AP1B1	0	-0.01	-0.02	0.01	-0.06	0.07	-0.06	-0.01	-0.01	-0.03	0.07	-0.1	0	0.09	-0.02	0.08	-0.07	0.09	0	0.04	-0.08	0.03	0	-0.03	-0.02	0.01	-0.06	0.05	0.04	0.03	0.03	-0.04	0.09	0.04	0.02	-0.01	0.07	0.03	0.07	-0.02	0.01	0.01	0	-0.03	0.01	0.03	0.01	0.16	-0.04
AP1G1	-0.09	-0.03	-0.06	-0.05	-0.01	0.02	0.01	-0.11	-0.13	0.02	0.11	0	-0.05	0	-0.01	-0.09	-0.08	0.01	-0.07	-0.07	0.05	-0.04	-0.09	-0.02	0.03	0	-0.04	0.07	-0.1	0.02	0.01	-0.06	0.1	-0.03	-0.04	-0.03	0.06	0.07	-0.08	-0.1	0.04	0.01	-0.08	-0.03	0	-0.06	-0.06	0.03	0.02
AP1G2	-0.04	0.03	-0.05	0.1	0.03	0.12	0.08	0.05	0.04	-0.02	0.38	0.01	0.1	0.09	0.02	0.11	-0.04	0.11	-0.08	0.26	-0.06	0.08	-0.07	0.11	0.04	-0.09	-0.18	-0.03	0.04	0.11	0	0.01	0.09	0.11	0.1	0.06	0.02	0.01	0.19	-0.03	0.01	0.05	0.03	0.02	0.05	0.1	0.02	0.05	0.11
AP1M1	0.07	0.02	0.27	0.07	-0.05	0.06	-0.25	0.13	0.07	0.03	-0.34	-0.01	0.09	0.01	0.12	0.11	0.07	0.09	0.24	-0.4	0.22	0.13	0.23	0.05	0.05	0.08	0.2	0.12	0.1	0.17	0.1	0.1	-0.08	0.1	0.07	0.07	-0.07	0.02	-0.04	0.15	0	0.07	0.13	0.03	0.03	0	0.13	-0.03	-0.04
AP1M2	-0.12	-0.08	-0.27	-0.2	0.05	-0.15	0.25	-0.2	-0.15	-0.06	0.25	-0.03	-0.23	-0.17	-0.17	-0.27	-0.12	-0.19	-0.32	0.31	-0.19	-0.24	-0.32	-0.12	-0.06	-0.24	-0.31	-0.13	-0.09	-0.26	-0.22	-0.24	-0.02	-0.21	-0.18	-0.19	0.03	-0.04	-0.15	-0.23	0.06	-0.19	-0.27	-0.12	-0.12	0.01	-0.29	0.08	-0.09
AP1S1	-0.08	-0.14	-0.18	-0.13	-0.1	-0.1	0.07	-0.19	-0.14	-0.07	-0.13	-0.04	-0.17	-0.17	-0.09	-0.2	-0.06	-0.14	-0.11	0.05	-0.09	-0.26	-0.2	-0.11	-0.02	-0.26	-0.13	-0.04	-0.04	-0.21	-0.07	-0.16	0.01	-0.18	-0.13	-0.12	0.1	0.04	-0.21	-0.09	0.14	-0.12	-0.18	-0.12	-0.1	-0.05	-0.18	0.02	-0.12
AP1S2	0.11	0.08	0.19	0.02	-0.06	0.05	-0.16	0.11	0.11	0.04	-0.34	-0.03	0.03	0.04	0.09	0.11	0.06	0.03	0.21	-0.3	0.15	0.08	0.18	-0.05	0.01	0.04	0.18	0.06	0.04	0.09	0.1	0.1	0.01	0.01	0.02	0.07	-0.07	0.09	0	0.15	-0.02	0.09	0.1	-0.02	0	-0.02	0.15	0.03	-0.09
AP1S3	-0.04	-0.04	-0.25	-0.12	-0.04	-0.07	0.15	-0.15	-0.15	-0.05	0.16	-0.06	-0.2	-0.1	-0.1	-0.2	-0.1	-0.12	-0.28	0.15	-0.09	-0.19	-0.38	-0.08	-0.05	-0.22	-0.26	-0.06	-0.08	-0.18	-0.11	-0.19	0.04	-0.25	-0.13	-0.14	0.05	0.05	-0.12	-0.19	0.09	-0.1	-0.24	-0.06	-0.03	0.02	-0.23	0.1	0.02
AP2A1	0.11	-0.06	-0.07	-0.11	-0.09	-0.03	-0.06	-0.08	-0.08	0	-0.1	0.01	-0.13	-0.15	0.01	-0.1	-0.09	-0.09	0	-0.09	-0.03	-0.12	-0.03	-0.03	-0.04	-0.1	0.02	-0.01	-0.06	-0.1	0.01	-0.08	0.02	-0.1	-0.09	-0.08	0.09	-0.06	-0.22	-0.07	0.07	-0.09	-0.18	-0.04	-0.04	0	-0.08	0.09	-0.1
AP2A2	-0.01	-0.02	0.11	0	-0.02	0.02	-0.09	0.06	-0.03	0.02	-0.11	0.03	0.03	-0.06	0.05	0.03	-0.1	-0.08	0.04	-0.06	0.08	-0.01	0.07	-0.01	-0.04	-0.01	0.1	0.01	0	-0.03	0.03	0.01	-0.04	0.01	0.01	-0.04	0.03	0.04	-0.05	0	0.01	-0.03	0	0.02	0.01	-0.05	0	-0.06	0.03
AP2B1	-0.06	-0.11	-0.1	-0.09	0.02	-0.09	0.21	-0.21	-0.21	0	-0.06	-0.01	-0.07	-0.29	-0.09	-0.23	-0.07	-0.13	-0.17	0.01	0.04	-0.21	-0.14	-0.09	-0.06	-0.16	-0.14	-0.1	-0.04	-0.19	-0.14	-0.15	0.04	-0.16	-0.16	-0.17	0.11	-0.05	-0.27	-0.12	0.08	-0.1	-0.16	-0.05	-0.14	-0.01	-0.3	-0.04	-0.01
AP2M1	-0.03	-0.14	-0.05	-0.18	-0.02	-0.17	0.05	-0.19	-0.17	-0.02	-0.18	-0.03	-0.19	-0.29	-0.04	-0.21	-0.06	-0.22	-0.11	-0.14	0.01	-0.17	-0.14	-0.19	-0.06	-0.07	-0.02	-0.02	-0.09	-0.13	-0.18	-0.21	-0.34	-0.22	-0.2	-0.24	0.03	-0.05	-0.35	-0.11	0.08	-0.07	-0.21	-0.17	-0.16	-0.05	-0.23	0.01	-0.13
AP2S1	0.04	-0.1	-0.12	-0.16	-0.01	-0.12	0.17	-0.18	-0.12	-0.02	-0.23	-0.01	-0.24	-0.2	-0.08	-0.22	-0.05	-0.23	-0.1	-0.01	-0.06	-0.23	-0.13	-0.22	-0.1	-0.22	-0.06	-0.04	-0.03	-0.22	-0.11	-0.18	-0.09	-0.23	-0.14	-0.14	0.06	0.08	-0.34	-0.12	0.05	-0.13	-0.24	-0.1	-0.16	0.03	-0.24	0.09	-0.15
AP3B1	-0.05	0	0.09	-0.02	-0.03	0.03	-0.07	0.08	-0.06	0.01	-0.02	0.01	0.08	0.03	0.1	0.05	-0.02	0.08	0.08	-0.25	0.23	0.13	0.09	0.08	0.1	0.05	0.12	0.09	0.07	0.09	0.06	0	-0.02	0.05	0.03	0.03	0.08	-0.12	-0.07	0.03	0.06	0.08	0.04	0.07	0.02	0.05	-0.04	0.01	0.08
AP3B2	0.1	0.07	0.03	0.01	0.04	0.03	0	0.12	0.13	0.03	-0.02	0.05	0.06	0.15	0.02	0.04	0.02	0.09	0.01	-0.02	-0.05	0.13	0.09	-0.01	-0.02	0.09	0.01	0.02	-0.05	-0.03	-0.01	0.05	-0.16	0.1	0.01	0.07	-0.11	-0.07	0.18	0.09	-0.02	0.15	0.09	0.02	-0.01	-0.12	0.14	0	-0.04
AP3D1	-0.06	0	-0.05	-0.06	0	-0.04	-0.02	-0.11	-0.14	-0.07	-0.13	0	-0.1	0	-0.02	-0.06	-0.04	-0.05	-0.05	-0.07	-0.01	-0.04	-0.04	-0.05	-0.04	-0.06	-0.01	0.02	0.01	-0.11	0	-0.02	-0.08	-0.07	-0.07	-0.02	0.03	0.01	-0.12	-0.07	0.05	0	-0.05	-0.03	-0.06	0.02	-0.01	-0.02	-0.08
AP3M1	-0.09	0.08	0.1	0.14	-0.05	0.09	-0.17	0.2	0.12	0.04	0.04	-0.05	0.18	0.16	0.08	0.23	0.01	0.16	0.18	-0.07	0.14	0.25	0.2	0.21	0.17	0.16	0.1	0.04	0.13	0.19	0.17	0.16	0.13	0.18	0.15	0.15	-0.01	-0.1	0.24	0.14	-0.04	0.06	0.26	0.11	0.11	-0.04	0.17	-0.15	0.01
AP3M2	0.01	0.07	0.03	0.11	-0.04	0.06	-0.11	0.15	0.15	0.01	-0.06	0.02	0.1	0.14	0	0.15	0.06	0.11	0.07	0.06	-0.1	0.09	0.1	0.03	0.02	0.11	0.04	0	0.08	0.01	0.07	0.13	0.18	0.12	0.05	0.1	-0.15	-0.06	0.21	0.1	-0.06	0.01	0.11	0.08	0.09	-0.04	0.14	-0.17	0.06
AP4B1	-0.07	0.06	0.25	0.26	-0.01	0.14	-0.15	0.18	0.12	0.06	-0.14	-0.01	0.22	0.28	0.14	0.23	0.1	0.25	0.24	-0.13	0.07	0.16	0.24	0.16	0.13	0.14	0.12	0.11	0.2	0.25	0.15	0.22	0.05	0.22	0.24	0.12	-0.05	0	0.23	0.22	0.02	0.2	0.3	0.11	0.09	0.06	0.23	-0.04	0.09
AP4E1	-0.02	0	0.04	0.15	-0.02	0.06	-0.1	0.07	0.04	-0.03	-0.12	0.04	0.12	0.18	0.1	0.14	0.03	0.13	0.17	-0.27	0.18	0.14	0.2	0.1	0.09	0.14	0.19	0.08	0.07	0.19	0.11	0.1	-0.22	0.11	0.13	0.07	-0.07	-0.06	0.1	0.12	-0.08	0.08	0.21	0.08	0.04	0.05	0.11	-0.03	0.04
AP4M1	0.05	0.03	0.06	0	-0.04	0.03	-0.04	0.04	0.06	0.04	-0.08	0.02	0.05	-0.03	-0.02	0.02	0.01	-0.03	0.11	0.04	0.02	0.05	0.04	0.01	-0.04	0	0.01	0.07	-0.01	-0.05	0.02	-0.03	-0.05	0.04	-0.05	0.03	0	-0.08	0.06	0.09	0.01	-0.08	0.02	0.01	0.04	-0.04	0.08	0.01	-0.02
AP4S1	0.03	0.01	0.05	0.09	0.09	0.08	0.2	-0.03	-0.03	0.03	0.06	0.03	0.06	0.1	0.02	-0.01	0.06	0.14	-0.05	-0.02	0.17	-0.02	0.04	-0.04	0.02	0.01	-0.01	-0.01	0.04	0.03	0.03	0.05	-0.18	0.02	0.05	-0.03	0.08	0.03	0.05	0	0.07	0.05	0.01	0.04	0.01	0.05	-0.06	0.05	0.09
AP5B1	-0.02	0.07	0.01	0.13	-0.05	0.12	-0.23	0.14	0.14	0.02	0.07	0.1	0.11	0.22	0.07	0.13	0.07	0.12	0.09	-0.12	0.03	0.15	0.1	0.15	0.08	0.03	0.04	0.03	0.15	0.12	0.09	0.12	0.01	0.14	0.12	0.14	-0.04	0.06	0.14	0.09	0.01	0.09	0.19	0.1	0.11	0.08	0.14	-0.13	0.05
AP5M1	0.09	0.1	0.04	0.15	0.06	0.11	0.02	0.15	0.22	0	0.2	0.03	0.17	0.1	0.09	0.15	0.1	0.14	0.09	0.23	0.01	0.14	0.09	0.09	0.04	0.04	-0.01	0.09	0.11	0.11	0.08	0.15	-0.03	0.19	0.16	0.15	0.04	0.12	0.18	0.12	0.02	0.07	0.16	0.11	0.12	0.05	0.18	0.14	0.06
AP5S1	0.07	-0.09	-0.08	-0.14	-0.07	-0.07	0.09	-0.17	-0.1	-0.03	-0.15	0.01	-0.21	-0.17	-0.06	-0.15	-0.09	-0.16	-0.06	-0.09	-0.03	-0.23	-0.12	-0.16	-0.09	-0.1	-0.02	0	-0.09	-0.14	-0.08	-0.17	-0.25	-0.22	-0.17	-0.08	-0.01	-0.07	-0.26	-0.08	-0.02	-0.04	-0.2	-0.06	-0.12	0.02	-0.1	0.05	-0.16
AP5Z1	-0.01	0.04	0.02	-0.1	-0.08	0.02	-0.17	-0.07	-0.02	-0.01	0.02	0.01	-0.04	0.09	0.04	0.01	-0.03	0.04	0.08	-0.18	-0.01	-0.02	0.01	0	-0.02	0.02	0.04	0.1	-0.06	0.03	0.04	-0.04	-0.05	0.01	-0.05	0.06	-0.01	-0.02	-0.08	-0.11	-0.05	0.04	-0.06	-0.09	0.01	0.02	0.13	0.06	-0.04
APAF1	-0.07	0.04	0.2	0.19	0.03	0.11	-0.07	0.16	0.12	0.05	0.01	-0.02	0.14	0.15	0.11	0.13	0.1	0.18	0.2	-0.1	0.16	0.14	0.22	0.12	0.13	0.1	0.13	0.07	0.11	0.2	0.15	0.14	0.14	0.18	0.14	0.08	0.06	-0.02	0.16	0.14	-0.04	0.1	0.19	0.03	0.05	0.06	0.13	-0.1	0.12
APBA1	0.03	0.02	0.04	-0.07	0.02	-0.06	0.1	-0.01	0.05	0.02	0.04	-0.02	-0.03	-0.04	0.04	0.01	0.01	-0.04	-0.03	0.06	-0.03	0.08	0.02	0	-0.03	-0.02	-0.01	0	-0.12	-0.04	-0.06	-0.01	-0.14	-0.01	-0.04	0.02	0.07	-0.03	0	0.04	-0.02	-0.01	-0.03	-0.02	0.01	-0.01	0.08	0.04	-0.02
APBA2	0.2	0.03	0.12	0.1	-0.09	-0.01	-0.06	0.01	0.06	0.05	-0.14	0.01	0.09	0.09	0.01	0.05	0.06	0.01	0.11	-0.05	-0.03	0.11	0.14	0.03	0.05	0.07	0.1	-0.02	0.04	0.08	0.03	0.06	-0.1	0.08	0.02	0.03	-0.17	0.09	0.08	0.11	0.04	0.04	0.21	0.03	0.05	-0.05	0.07	0.09	-0.03
APBA3	0.09	0.11	0.14	0.14	-0.01	0.06	-0.15	0.06	0.11	0.01	-0.1	-0.02	0.14	0.13	0.1	0.16	0.02	0.16	0.19	-0.12	0.16	0.11	0.18	0.1	0.06	0.08	0.07	0.11	0.08	0.21	0.11	0.15	-0.08	0.18	0.15	0.04	0	0.21	0.1	0.1	-0.05	0.13	0.17	0.08	0.1	0.07	0.16	0.05	0.1
APBB1	0.11	-0.03	0.12	-0.04	0	0	-0.02	-0.09	-0.04	0.05	-0.16	0.01	-0.03	-0.03	0.02	-0.02	-0.05	-0.14	0.03	-0.1	-0.05	-0.01	0.05	-0.03	-0.04	-0.04	0.12	0.04	-0.06	-0.06	-0.01	-0.01	-0.15	-0.02	-0.06	-0.04	-0.09	0.05	-0.08	0.07	0.01	0.01	-0.04	0	-0.01	-0.08	0.06	0.07	-0.06
APBB1IP	0.05	0.08	0.26	0.15	-0.03	0.17	-0.27	0.22	0.15	0.04	0	-0.01	0.19	0.22	0.12	0.25	0.13	0.2	0.2	-0.23	0.1	0.21	0.17	0.12	0.09	0.17	0.13	0.13	0.14	0.28	0.23	0.19	0.03	0.15	0.22	0.09	0	-0.05	0.23	0.22	-0.03	0.18	0.2	0.04	0.14	0.08	0.21	-0.03	0.05
APBB2	-0.06	-0.03	0	-0.13	0.04	-0.08	0.1	-0.04	-0.05	0	-0.12	-0.01	-0.12	-0.22	-0.06	-0.17	0.02	-0.11	-0.07	-0.07	0.06	-0.02	-0.11	-0.17	-0.05	-0.15	-0.01	0.02	-0.15	-0.13	-0.13	-0.14	-0.21	-0.14	-0.08	-0.08	0	0.04	-0.19	-0.06	0.03	-0.09	-0.19	-0.05	-0.07	-0.04	-0.13	-0.06	0.01
APBB3	-0.06	0.01	0.07	0.08	-0.01	0.04	-0.13	0.09	0.04	0.02	0.03	0.04	0.11	0.19	0.04	0.12	-0.03	0.19	0.1	-0.05	0.03	0.12	0.07	0.09	0.05	0.08	0.02	0.05	0.07	0.08	0.05	0.08	0.04	0.11	0.08	0.05	-0.03	0.01	0.2	0.08	-0.08	0.05	0.13	0.04	0.02	0	0.12	0.01	0.02
APC	-0.05	0.05	0.09	0.04	-0.01	0.03	-0.14	0.13	0.04	0.03	-0.12	-0.01	0.03	0.04	0.01	0.05	0.05	0.1	0.14	-0.18	0.1	0.11	0.14	-0.01	0.12	0.08	0.17	0.1	0.04	0.06	0.09	0.05	-0.06	0.1	-0.02	0.11	0	-0.04	0.07	0.1	-0.04	0.12	0.08	0.04	0.03	-0.06	0.16	0.02	-0.03
APC2	0.16	0.07	0.03	0.03	0	0.1	0.04	0.04	-0.01	-0.03	0	0.01	0.09	0.08	0.04	0.09	-0.05	0.1	0.01	-0.07	-0.02	0.07	0.03	0.07	0	-0.02	-0.06	-0.01	0.05	0.01	0.08	0.04	-0.02	0.06	0.03	0.04	-0.04	0.04	0.13	0.06	0.05	0.1	0.09	0.02	0.07	0	0.08	0.14	0.01
APCDD1	0.06	0.02	-0.08	0	0.09	0.01	0.08	-0.03	0	0.02	0.1	0.05	0.03	-0.02	-0.02	0	-0.07	0	-0.01	0.16	-0.12	-0.04	-0.04	-0.01	-0.11	0.03	0.01	0.07	-0.12	-0.05	-0.02	0.01	0.07	0.03	-0.03	0.06	0.01	0.07	0.05	0.03	0.01	-0.03	-0.02	0.01	-0.05	-0.06	0.06	0.04	0.01
APCDD1L	0.02	-0.05	0.04	-0.12	0	-0.07	0.01	-0.09	-0.14	-0.01	-0.1	0.02	-0.08	-0.09	-0.03	-0.14	-0.04	0.05	0.02	-0.25	0.1	-0.14	-0.05	-0.15	-0.02	-0.03	0.05	0.06	-0.07	-0.02	-0.01	-0.09	-0.1	-0.11	-0.12	-0.16	-0.04	0.02	-0.25	-0.02	0.02	-0.04	-0.12	-0.11	-0.09	0.02	-0.12	0.1	0.02
APCDD1L-AS1	0.04	-0.05	-0.03	-0.08	-0.01	-0.07	-0.09	-0.03	-0.13	0	-0.04	0	-0.12	-0.11	-0.03	-0.14	-0.03	-0.08	-0.06	-0.16	0.03	-0.13	-0.12	-0.1	0.04	-0.1	-0.03	-0.01	-0.05	-0.01	-0.09	-0.09	-0.12	-0.14	-0.1	-0.18	0.03	0.04	-0.2	-0.01	0.02	0	-0.13	-0.1	-0.04	0.05	-0.12	0.08	0.02
APCS	0.07	0.06	0.02	0.09	0.01	0.08	-0.09	0.15	0	-0.02	0	0.02	0.07	0.11	0.01	0.09	0.06	0.11	0.02	-0.08	-0.1	0.12	0.04	0.04	0.11	0.02	-0.03	0.01	0.07	0.12	0.1	0.11	-0.05	0.03	0.14	0.03	-0.03	-0.04	0.13	0.07	0.05	0.11	0.11	0	0.07	0.06	0.12	0.03	0
APEH	0	-0.07	-0.07	0	-0.08	0.04	-0.03	-0.13	-0.11	-0.1	0.06	-0.05	-0.09	0.04	-0.04	-0.01	-0.07	0.03	-0.06	0.1	0.01	-0.04	-0.09	0.06	0.01	-0.1	-0.11	-0.08	0.12	-0.01	0.01	-0.07	0.17	-0.02	0.01	-0.01	0.09	-0.07	0	-0.11	-0.02	-0.05	-0.01	-0.07	-0.04	0.08	-0.02	-0.05	-0.08
APEX1	0.01	0.12	0.13	0.28	0.01	0.17	-0.09	0.23	0.15	0.1	0.07	0.04	0.32	0.29	0.16	0.22	0.03	0.26	0.19	0.09	0.1	0.22	0.26	0.22	0.05	0.16	0.08	0.07	0.17	0.19	0.12	0.19	-0.05	0.32	0.19	0.13	-0.06	0	0.3	0.16	0.03	0.12	0.32	0.14	0.13	0	0.17	0.07	0.1
APEX2	-0.07	0.04	-0.01	0.09	-0.08	0.02	-0.15	-0.01	-0.06	0	-0.04	0	0.06	0.15	0	0.03	0.01	0.12	0	0.02	-0.02	0	0.01	0.01	-0.01	-0.06	-0.09	0.03	0.07	0.04	0.07	0.03	0.06	0.05	0.05	-0.01	0.04	-0.07	0.07	0.05	0.01	0.01	0.06	0.01	0.03	0.02	0.03	0.04	-0.04
APH1A	-0.04	0.01	-0.02	0.02	-0.05	0.02	-0.15	-0.05	-0.09	-0.03	0.09	-0.01	0.03	0.05	0.03	0.02	-0.08	-0.05	-0.06	0.09	-0.07	0.01	-0.04	0.06	0.04	0.01	-0.06	-0.04	0.03	0.01	0.01	-0.01	0.06	0.01	0.03	-0.05	0.04	-0.02	-0.02	-0.04	0.02	-0.02	0.03	0.03	0.09	-0.01	-0.04	0.09	0
APH1B	-0.01	0.02	0.18	0	-0.04	0.07	-0.12	0.07	0.07	-0.02	-0.15	0.02	0.02	0.02	0.07	0.05	0.03	0.03	0.15	-0.26	0.25	0.1	0.14	-0.03	0.01	0.14	0.13	0.16	-0.02	0.03	0.06	0.05	-0.16	0.04	0.01	0.04	-0.07	-0.1	-0.03	0.09	-0.01	0.08	0.01	0.02	-0.02	0.04	0.12	-0.09	-0.02
API5	-0.08	0.1	-0.01	0.13	0.02	0.07	-0.01	0.09	0.03	0.02	0.02	-0.03	0.09	0.1	0.05	0.12	-0.05	0.13	0.05	0.03	0.02	0.06	0.08	0.08	0.06	0.06	-0.03	-0.02	0.1	0.05	0.11	0.05	0.15	0.11	0.11	0.05	-0.02	0.04	0.15	0.07	-0.07	0.06	0.16	0.11	0.11	-0.04	0.13	0.03	-0.04
APITD1	0.07	0.03	-0.08	0.11	0.01	0.02	0.02	-0.02	0.01	-0.02	-0.08	0	0.01	0.12	0.06	0	0.05	0.08	0	0	-0.05	-0.05	0.01	-0.05	-0.05	-0.01	-0.03	0.03	0.08	-0.03	0.01	0.01	0.06	-0.03	0.04	0.01	0.05	0	0.03	-0.01	0.01	0.09	0.06	0.1	0.01	0.01	-0.04	0	-0.03
APLF	0.07	0.03	0.11	0.03	-0.04	0.07	0.01	0.03	0.09	0.03	0.04	-0.07	0.05	0.03	0.03	0.1	0.02	0.1	0.15	-0.09	0.18	0.06	0.04	0.03	-0.01	0.07	0.08	0.1	0.01	0.15	0.08	0.05	-0.04	0.03	0.06	0.04	-0.03	0.06	0.04	0	0.02	0.01	0.06	0.03	-0.01	0.04	0.11	-0.02	0.11
APLN	-0.06	-0.04	0.02	0.01	-0.04	0	-0.05	-0.02	-0.03	0	-0.06	0.05	-0.06	-0.05	0.02	-0.05	-0.04	0.04	0.01	-0.14	0.07	-0.05	-0.03	-0.04	0.09	-0.11	-0.05	-0.01	0.05	-0.02	0.03	0.02	-0.1	-0.08	-0.03	-0.09	-0.01	-0.04	-0.06	-0.02	0.04	-0.07	-0.02	-0.03	-0.01	0.05	-0.02	0.09	-0.02
APLNR	0	0.04	0.03	0.1	0.01	0.07	0	0.04	0.02	0	0.08	-0.01	0.03	0.12	0.04	0.09	-0.04	0.08	0.01	0.01	0.03	0	0.07	0.06	0.08	0.03	-0.04	-0.04	0.05	0.1	0.1	0.11	0.01	0.06	0.09	0.04	-0.01	0.02	0.09	0.05	0.03	0.09	0.08	0.05	0.05	0.09	0.04	0.02	-0.04
APLP1	0.08	0	0.06	-0.11	0.05	-0.06	0.1	0	0.02	0.02	-0.16	0.03	-0.1	-0.1	0.01	-0.13	-0.04	-0.15	0	-0.08	-0.01	-0.02	0.03	-0.09	-0.08	0.01	-0.01	0.05	-0.07	-0.17	-0.04	-0.05	-0.04	-0.07	-0.09	-0.05	-0.02	0.04	-0.09	0	0.03	-0.02	-0.1	0.03	-0.03	-0.08	-0.04	0.04	-0.11
APLP2	-0.05	-0.15	-0.14	-0.22	-0.01	-0.1	0.1	-0.18	-0.14	0.02	0.12	0.07	-0.18	-0.33	-0.03	-0.26	-0.07	-0.25	-0.22	0.04	0.03	-0.16	-0.21	-0.06	-0.02	-0.15	-0.18	-0.13	-0.06	-0.19	-0.18	-0.18	0.05	-0.15	-0.18	-0.18	0.16	-0.01	-0.32	-0.29	0.06	-0.14	-0.32	-0.07	-0.14	0.09	-0.29	-0.04	-0.05
APMAP	-0.03	-0.14	-0.22	-0.28	0.01	-0.2	0.22	-0.22	-0.16	-0.1	-0.07	0.02	-0.31	-0.29	-0.12	-0.26	-0.13	-0.29	-0.12	-0.01	-0.04	-0.26	-0.23	-0.18	-0.13	-0.2	-0.1	-0.03	-0.12	-0.22	-0.19	-0.24	-0.05	-0.25	-0.27	-0.17	0.04	-0.02	-0.32	-0.2	-0.02	-0.14	-0.32	-0.11	-0.12	-0.05	-0.26	-0.01	-0.15
APOA1	0.09	0.01	-0.01	-0.01	0.01	0.03	0.06	-0.02	-0.01	-0.04	0.04	0.03	0	0.02	-0.02	0.01	-0.04	0.02	-0.03	0.02	-0.04	-0.06	-0.01	-0.01	0.09	-0.05	-0.06	-0.04	0.02	0.01	0.04	0.01	0.04	-0.03	0.01	0.02	0.05	-0.01	0.04	-0.02	0.05	0.04	-0.01	-0.04	0.02	0.07	0.02	-0.04	-0.05
APOA1BP	0.05	0.09	-0.13	0.03	-0.04	0.02	-0.1	0.04	-0.04	0	0.02	0.04	-0.04	0.06	-0.02	-0.01	-0.06	-0.08	-0.12	0.22	-0.17	-0.01	-0.08	0.03	-0.04	-0.06	-0.11	-0.06	0.06	-0.16	0.02	-0.03	0.04	-0.09	0.06	-0.03	-0.01	0.01	0.09	0.02	0.03	-0.03	0.03	0.08	0.06	-0.07	-0.03	0.15	-0.08
APOA2	0.09	0.04	-0.01	0.08	-0.02	0.13	-0.02	0.06	0.05	0	0	0.03	0.06	0.09	-0.01	0.1	0	0.13	0.02	-0.01	0.05	0.09	0.09	0.12	0.05	0.1	0.02	-0.1	0.07	0.04	0.02	0.11	0.08	0.06	0.14	0	-0.02	0.05	0.15	0.03	0.02	0.03	0.1	0.06	0.07	0.05	0.09	0.02	-0.03
APOA4	0.03	0.03	-0.01	0.01	-0.01	0.04	-0.04	0.04	-0.02	0	0.06	0.05	-0.01	0.05	0	0	0	0.03	-0.02	-0.01	-0.15	0.03	-0.04	0.01	0.06	-0.04	-0.06	-0.01	0.03	0.02	0.02	0.01	0.08	-0.01	0.01	0.01	-0.06	0.08	0.02	0.02	0.05	0.08	0.02	-0.04	0.04	0.05	0.04	0.15	-0.02
APOA5	0.05	0.02	0.04	-0.01	-0.02	0.06	-0.01	-0.02	-0.04	0.01	0.01	-0.03	-0.03	0.12	-0.04	0	0	0.1	-0.04	-0.08	-0.06	-0.02	-0.04	-0.07	0.03	-0.01	-0.07	0.01	0.01	0	0.05	-0.01	-0.3	-0.03	-0.01	-0.05	0	0.1	0.08	0.01	0.03	0.06	0.04	-0.08	-0.01	0.06	0.03	0.13	-0.05
APOB	0.02	-0.05	0.02	0.02	-0.01	0.07	-0.04	0.01	-0.03	-0.03	0.04	-0.02	0.02	0.06	-0.01	0.06	-0.03	0.05	-0.06	-0.04	-0.07	0	-0.04	0.05	0.02	-0.04	-0.05	-0.02	0.04	0	0.03	0.02	0.04	0	0.1	-0.02	0.06	-0.02	0.08	0.01	0	0.06	0.03	0.04	0.07	0.04	0.04	-0.08	-0.02
APOBEC1	-0.02	-0.02	-0.04	0.02	-0.04	0.07	-0.08	-0.02	0.04	-0.03	0.12	-0.01	0.08	0.11	-0.06	0.06	0.05	0.04	-0.06	0.13	-0.09	0.01	-0.01	0.08	0.04	-0.05	-0.09	-0.08	0.02	0.01	0.02	0.02	0.14	0.03	0.03	0.01	0.01	0.02	0.11	0	-0.03	0.03	0.06	-0.05	0.04	0.01	0.05	0.02	-0.01
APOBEC2	0.01	0.05	0.08	0.05	-0.01	0.08	-0.01	0.09	0.12	0.02	0.08	0.05	0.07	0.03	0.02	0.12	0.05	0.17	0.04	-0.03	-0.07	0.09	0.08	0.04	0.07	0.04	-0.02	0.01	0.09	0.13	0.11	0.04	-0.07	0.12	0.13	0.07	-0.05	0.1	0.12	0.05	-0.01	0.18	0.12	0.05	0.07	0.03	0.15	0.01	-0.03
APOBEC3A	-0.06	0.03	0.02	0.12	-0.01	0.02	-0.07	-0.04	-0.03	-0.05	0.04	0.01	0.05	0.02	0.05	0	-0.03	0.1	0	-0.03	-0.03	-0.01	-0.01	0	0.01	0.02	-0.04	0.04	0.02	0.08	0.04	0.07	0.02	-0.01	0.02	-0.02	0.13	0.01	0.01	0.04	-0.04	0.03	0.06	0	0.03	0.07	0.03	0.14	0.08
APOBEC3B	-0.01	-0.01	-0.08	-0.04	-0.01	-0.11	0.1	-0.13	-0.12	-0.11	-0.12	-0.03	-0.17	-0.1	-0.05	-0.19	0	-0.08	-0.1	-0.02	-0.02	-0.12	-0.14	-0.14	-0.1	-0.09	-0.1	-0.05	0	-0.04	-0.09	-0.1	0.12	-0.19	-0.12	-0.09	0.13	0.03	-0.2	-0.11	-0.04	-0.06	-0.15	-0.08	-0.07	0.07	-0.13	0.13	-0.06
APOBEC3C	-0.03	0	0.1	0.07	-0.09	0.08	-0.25	0.08	0.04	-0.03	-0.07	-0.07	0.06	0.09	0.1	0.1	0.04	0.1	0.13	-0.22	0.17	0.04	0.05	0.06	0.04	0.03	0.05	0.08	0.09	0.21	0.1	0.07	0.22	0.04	0.07	0.05	0.03	0.09	0	0.08	-0.03	0.05	0.08	-0.04	0.03	0.09	0.02	0	0.12
APOBEC3D	-0.04	-0.01	0.09	0.1	-0.04	0.08	-0.07	0.04	-0.02	-0.03	0.03	-0.04	0.08	0.06	0.07	0	0.06	0.11	0.04	-0.13	0.08	0.03	0.03	0.06	0	0.04	0.04	0.06	0.07	0.13	0.08	0.04	0.09	0.05	0.12	-0.01	0.09	0.15	-0.04	0.02	0.03	0.07	0.09	0.04	0.06	0.05	0.03	0.09	0.05
APOBEC3F	-0.01	-0.04	-0.02	-0.08	-0.02	-0.08	-0.04	-0.08	-0.06	-0.05	-0.12	-0.1	-0.13	-0.18	-0.05	-0.19	0.05	-0.11	-0.02	-0.11	0.05	-0.11	-0.09	-0.1	-0.08	-0.09	-0.02	0.05	-0.07	-0.05	-0.08	-0.11	0.08	-0.12	-0.12	-0.13	0.02	0.05	-0.3	-0.06	0	-0.1	-0.17	-0.12	-0.08	0.1	-0.08	0.05	0.08
APOBEC3G	-0.04	0.02	0.18	0.11	-0.07	0.06	-0.27	0.08	0.05	-0.02	-0.11	-0.04	0.1	0.06	0.09	0.12	0.07	0.13	0.13	-0.22	0.09	0.09	0.11	0.07	0.05	0.02	0.06	0.06	0.11	0.23	0.07	0.12	0.13	0.08	0.09	0.08	-0.03	0.06	0.02	0.17	-0.08	0.05	0.12	0	0.09	0.12	0.11	-0.03	0.12
APOBEC4	-0.05	0.08	0.21	0.12	-0.04	0.12	-0.09	0.12	0.07	-0.04	0.02	-0.01	0.18	0.11	0.08	0.18	0.05	0.13	0.14	-0.08	0.15	0.11	0.18	0.08	0.07	0.15	0.09	0.05	0.12	0.18	0.17	0.17	0.05	0.17	0.18	0.14	0	0.08	0.17	0.15	-0.03	0.15	0.17	0.1	0.1	0	0.16	-0.01	0.12
APOBR	0.03	0.04	0.16	0.12	-0.08	0.08	-0.19	0.08	0.09	0.04	0.12	-0.01	0.15	0.16	0.02	0.21	0.03	0.19	0.1	-0.08	0.09	0.19	0.11	0.13	0.11	0.13	0.03	0.06	0.1	0.23	0.13	0.12	0.18	0.15	0.18	0.15	-0.01	-0.12	0.2	0.1	-0.03	0.12	0.19	-0.01	0.11	0.1	0.17	0.06	0
APOC1	0.04	-0.02	-0.15	0.02	0.03	-0.02	0.23	-0.11	-0.07	-0.04	0.02	0.01	-0.03	0.04	-0.05	-0.06	-0.05	-0.02	-0.14	0.18	-0.02	-0.1	-0.03	0	-0.09	-0.05	-0.06	-0.16	0.06	0	-0.04	-0.05	0.18	-0.04	0.02	0	0.05	0.02	0.03	-0.09	0.06	0.02	-0.01	0.04	0	0.07	-0.12	-0.01	-0.03
APOC1P1	0.02	0.04	0.06	0.16	0.1	0.1	0.13	0.12	0.12	0.05	0.07	0	0.13	0.16	0.06	0.17	0.06	0.19	0.09	0	-0.11	0.11	0.14	0.08	0.12	0.06	0.06	0.03	0.02	0.11	0.14	0.15	-0.01	0.11	0.16	0.09	-0.1	-0.06	0.23	0.1	-0.05	0.13	0.14	0.1	0.1	0.01	0.14	-0.02	0.05
APOC3	0.03	0	0.04	0.03	-0.03	0.01	-0.14	0.07	-0.04	-0.03	-0.01	0.04	0.04	0.06	0	0.05	0	0.07	0.01	-0.07	-0.04	0.01	0.06	0.08	0.03	-0.02	0.05	-0.04	0.08	0.07	0.06	0.05	-0.06	0.05	0.09	0.05	0	-0.04	0.08	0.01	0.01	0	0.09	0.03	0.06	0.01	0.06	-0.05	-0.07
APOD	-0.05	-0.03	-0.16	-0.12	-0.07	-0.02	0.02	-0.03	-0.08	-0.1	0.03	-0.05	-0.18	-0.02	-0.06	-0.04	-0.06	-0.09	-0.13	0.18	-0.15	-0.16	-0.19	-0.12	-0.05	-0.24	-0.14	-0.03	-0.09	-0.19	-0.06	-0.1	0.04	-0.15	-0.12	-0.04	0.01	0.06	-0.08	-0.08	0	-0.05	-0.17	-0.05	-0.07	0.02	-0.05	0.21	-0.07
APOE	0.06	-0.05	-0.08	-0.08	-0.01	-0.07	0.15	-0.13	-0.06	-0.01	-0.08	-0.02	-0.05	-0.01	-0.01	-0.03	0	-0.07	-0.06	-0.02	-0.04	-0.1	0	-0.08	-0.08	-0.04	-0.01	0.02	-0.01	-0.09	-0.01	-0.05	-0.02	-0.04	-0.03	0	-0.08	-0.03	-0.04	-0.05	0.01	0.02	-0.06	0.01	-0.06	0.03	-0.07	-0.05	-0.04
APOF	0.08	0.03	0.05	0.07	0.04	0.05	0	0.03	0.01	-0.01	0	-0.01	0.07	0.17	0	0.13	0.04	0.1	0.06	-0.05	-0.11	0.11	0.03	0.05	0.06	0.05	0.01	0.04	0.1	0.02	0.15	0.1	-0.1	0.02	0.07	0.04	-0.05	0.07	0.23	0.17	0.05	0.09	0.11	-0.02	-0.01	0.02	0.15	0.12	0.01
APOH	-0.05	-0.05	-0.11	-0.08	-0.03	-0.06	0.02	-0.04	-0.07	-0.07	0.02	-0.05	-0.08	0.02	-0.1	-0.11	-0.08	0.02	-0.11	0.04	-0.07	-0.11	-0.09	0	-0.04	-0.05	-0.11	-0.07	-0.04	-0.11	-0.01	-0.05	0	-0.1	-0.05	0.01	0.1	0	-0.03	-0.09	0.04	0	-0.07	0.01	0.03	0.01	-0.05	-0.11	-0.05
APOL1	-0.02	-0.08	-0.02	-0.06	-0.04	-0.12	-0.07	-0.02	-0.04	-0.05	0.06	0.02	-0.09	-0.22	-0.01	-0.11	0.05	-0.15	-0.1	-0.09	-0.03	-0.09	-0.12	-0.05	-0.06	-0.06	-0.12	0.01	-0.06	0.04	-0.1	-0.06	0.08	-0.17	-0.1	-0.1	0.1	-0.02	-0.2	-0.11	-0.04	-0.07	-0.17	-0.1	-0.05	0.11	-0.17	0.06	0.07
APOL2	0.07	-0.03	0.01	-0.05	-0.06	-0.08	-0.03	-0.03	-0.04	-0.04	0.05	-0.04	-0.11	-0.06	0.01	-0.02	0	-0.07	-0.04	-0.12	-0.1	-0.1	-0.13	-0.06	0.02	-0.11	-0.09	0.06	-0.04	0.02	0.01	-0.04	-0.13	-0.14	-0.02	-0.08	0	0.03	-0.11	-0.07	-0.03	-0.01	-0.12	-0.07	-0.08	0.09	-0.03	0.15	0.01
APOL3	0.01	0.01	0.08	0.06	-0.06	0.01	-0.19	0.05	0.02	-0.02	0.02	0.02	0.07	-0.08	0.12	0.03	0.06	0.06	0.05	-0.18	0.1	0.03	0.06	0.03	0.02	0.02	-0.01	0.09	0.01	0.17	0	0.03	-0.01	0.01	0.02	-0.02	0.09	0.02	-0.11	0.04	-0.04	0.04	-0.04	-0.03	0.04	0.16	0	0.05	0.12
APOL4	0.12	0.06	0.05	0.13	0.02	0.06	-0.07	0.11	0.09	0.03	0.09	0.04	0.17	0.11	0.05	0.16	0.05	0.2	0.04	0.01	-0.03	0.08	0.13	0.09	0.08	0.12	0.03	-0.01	0.14	0.16	0.13	0.16	0.07	0.09	0.12	0.03	-0.01	-0.04	0.21	0.13	0.02	0.09	0.17	0.04	0.11	0.03	0.1	0.08	0.01
APOL5	0.07	0	0.03	0.05	-0.04	0.08	0.04	0.08	0.05	0.02	0.07	-0.01	0.05	0.12	0.01	0.09	0.01	0.06	0.01	-0.09	-0.04	0.02	0.02	0.02	0.06	0.02	-0.01	0.01	0	0.04	0.04	0.05	0.16	0.02	0.08	0.02	-0.09	0.03	0.08	0.06	0.06	0.03	0.05	0	0.02	0.01	0.07	0.04	0.03
APOL6	0.06	0	0	0.04	-0.05	-0.01	0	-0.03	0.01	-0.02	0.14	0.06	0.05	-0.08	0.05	0.01	0.08	-0.02	0.03	-0.03	0.04	0	0	0.08	0.02	-0.01	-0.01	0.05	0.01	0.16	-0.03	0.01	0.03	0	0.03	0.01	0.06	-0.03	-0.16	-0.02	-0.02	-0.03	-0.04	-0.03	0	0.17	-0.05	0.04	0.15
APOLD1	0.08	0.07	0.04	-0.03	0.04	0.01	0.05	0.01	0.05	0.02	-0.11	0.02	-0.07	-0.05	0.02	0	0.01	-0.1	0.03	-0.1	0.03	0.07	0.03	-0.04	-0.07	-0.02	0.08	0.07	-0.05	0	-0.07	-0.02	-0.13	-0.04	-0.04	0.1	0.03	0.06	-0.1	0.04	0	0.04	-0.09	-0.06	-0.01	0.04	0.14	0.01	-0.02
APOM	0.08	0.07	0.17	0.14	0.03	0.12	-0.13	0.08	0.17	-0.01	0.08	0.04	0.2	0.06	0.11	0.18	0.02	0.16	0.14	-0.09	0.06	0.14	0.21	0.16	0.12	0.17	0.11	0.02	0.12	0.18	0.1	0.15	-0.04	0.2	0.2	0.16	-0.01	0.04	0.13	0.11	0.02	0.09	0.19	0.07	0.09	-0.03	0.21	0.05	0.02
APOO	-0.03	0.02	-0.11	-0.02	-0.01	-0.07	0.03	-0.03	-0.05	-0.03	-0.14	0	-0.09	0.11	0	-0.05	-0.09	0.01	-0.05	0.01	-0.12	-0.09	-0.04	-0.06	-0.02	-0.05	-0.08	-0.03	0.04	-0.17	0.01	0.03	0.02	-0.1	0.02	-0.03	-0.03	-0.06	0.05	0.02	-0.01	-0.03	0.06	0.12	0.01	-0.09	0	-0.02	-0.15
APOOL	-0.11	0.01	0.01	0.07	-0.02	-0.02	-0.15	0.06	0.05	-0.01	-0.05	0.05	0.01	0.12	0.02	0.11	-0.03	0.07	0.06	0	0.03	0.06	0.12	0.07	0.02	0.12	0.04	-0.01	0.07	-0.02	0.03	0.12	-0.07	0.03	0.08	0.05	0	0.01	0.16	0	-0.01	0.05	0.09	0.13	0.02	-0.07	0.06	-0.16	-0.09
APOPT1	-0.04	-0.01	-0.04	-0.03	0.03	0.05	0.14	-0.03	-0.08	-0.02	-0.03	0.02	-0.03	-0.08	-0.01	-0.13	-0.02	-0.01	-0.16	-0.03	0.08	-0.15	-0.1	-0.1	-0.05	-0.09	-0.09	-0.01	0.02	-0.08	-0.06	-0.06	-0.29	-0.12	-0.03	-0.11	0.07	0.06	-0.11	0	0.06	-0.05	-0.11	-0.02	-0.04	-0.03	-0.15	-0.02	0.02
APP	0.01	-0.14	-0.17	-0.3	0.02	-0.21	0.21	-0.16	-0.19	-0.07	0.01	0.01	-0.24	-0.32	-0.1	-0.31	-0.12	-0.29	-0.21	0.1	-0.11	-0.2	-0.25	-0.18	-0.16	-0.22	-0.19	-0.06	-0.14	-0.29	-0.21	-0.25	-0.07	-0.23	-0.27	-0.24	0.02	0.07	-0.38	-0.22	0.02	-0.17	-0.36	-0.11	-0.21	-0.01	-0.3	0.02	-0.07
APPBP2	-0.01	0.01	0.09	-0.09	0.03	-0.01	-0.01	0.02	0.02	0.14	-0.06	-0.03	0.02	-0.1	0	0.02	0	-0.04	0.06	-0.08	0.14	0.09	0.09	0.02	0	0.1	0.09	0.02	-0.11	-0.1	0	0.02	-0.07	0.05	-0.09	-0.06	-0.02	-0.02	0.03	0.04	-0.02	-0.03	-0.03	0	0.02	-0.11	0	-0.09	0.01
APPL1	-0.01	0.12	0.18	0.2	-0.02	0.18	-0.22	0.22	0.15	0.01	-0.04	0.03	0.2	0.22	0.1	0.25	0.12	0.23	0.22	-0.08	0.11	0.28	0.24	0.18	0.11	0.16	0.18	0.07	0.18	0.19	0.16	0.21	0.16	0.22	0.18	0.16	-0.07	-0.03	0.26	0.19	-0.07	0.13	0.31	0.13	0.17	0.07	0.22	-0.08	0.01
APPL2	-0.16	-0.11	-0.05	-0.23	-0.03	-0.1	0.11	-0.17	-0.13	-0.01	-0.12	-0.02	-0.21	-0.31	-0.13	-0.2	-0.04	-0.25	-0.08	0.05	-0.1	-0.14	-0.08	-0.13	-0.14	-0.03	0.02	-0.12	-0.13	-0.26	-0.16	-0.17	-0.02	-0.14	-0.22	-0.09	0.07	0.06	-0.22	-0.12	-0.01	-0.19	-0.27	-0.05	-0.11	-0.1	-0.1	-0.19	-0.07
APRT	0.01	0.05	-0.01	0.07	-0.11	0.07	-0.01	0	-0.09	-0.02	0.08	-0.02	0.02	0.12	-0.04	0.02	-0.07	0.07	-0.11	0.05	0.03	-0.01	-0.05	0.07	0.07	-0.02	-0.07	-0.06	0.06	0.03	0.09	-0.07	0.31	-0.01	0.03	0.03	0.03	0.05	0.12	-0.06	0.1	-0.01	0.08	0.01	0.09	-0.07	-0.04	0.16	-0.06
APTX	-0.03	0.01	-0.02	0.12	-0.01	0.03	-0.09	0.01	-0.03	0.01	0.09	-0.03	0.09	0.2	0.01	0.11	0.05	0.12	0.08	0.01	0.06	0.03	0.03	0.05	0.03	0.05	0.01	0.04	0.12	0.09	0.05	0.08	0.27	0.07	0.09	0.03	0.05	-0.07	0.19	0.04	-0.01	-0.02	0.17	0.01	0.05	-0.01	0.07	0.02	0.1
AQP1	0.07	-0.07	0.04	-0.01	-0.01	-0.02	0.14	-0.04	0.08	0.03	0.05	-0.02	0.08	-0.02	0.02	0.03	0.06	0.03	0.07	0.08	0.04	0.04	0.04	0.06	-0.02	0.12	0	0.04	-0.04	0.03	0.03	-0.03	-0.08	0.05	0.02	0	0.04	0.04	0.02	-0.04	0.01	0.02	0.05	0.01	0.01	0.01	-0.01	0.06	-0.02
AQP10	0.04	0.01	-0.04	0.1	0	0.05	-0.11	-0.03	-0.02	-0.01	0.08	0.02	0.08	0.15	-0.01	0.05	0	0.09	-0.02	-0.06	-0.06	0.03	0.04	0.03	0.02	-0.01	-0.04	0.01	0.03	0.04	0.08	0.06	0.07	0.06	0.07	0.01	-0.01	0.05	0.12	0.08	0.04	0.05	0.14	0.02	0.03	-0.02	0.02	0.14	0.06
AQP11	-0.08	-0.08	-0.05	-0.18	-0.04	-0.1	-0.04	-0.07	0.01	0.01	-0.05	0.08	-0.16	-0.26	-0.09	-0.18	0	-0.22	-0.09	0.04	0.04	-0.09	-0.07	-0.1	-0.07	-0.03	-0.02	-0.1	-0.06	-0.2	-0.1	-0.11	-0.08	-0.16	-0.12	0.01	0.05	-0.08	-0.15	-0.14	0.05	-0.12	-0.19	-0.02	-0.01	-0.08	-0.08	-0.12	-0.1
AQP2	0.12	0.05	0.09	0.09	-0.08	0.11	-0.1	0.03	0.04	0.02	-0.06	-0.05	0.08	0.14	0.01	0.13	0.02	0.12	0.05	-0.12	0.04	0.02	0.08	0.09	0.06	0.05	0	-0.06	0.08	0.08	0.08	0.12	0.08	0.05	0.14	0.05	0	0.06	0.11	0.12	0.02	0.07	0.14	0.04	0.1	0.04	0.08	0.08	0.05
AQP3	0.06	0	-0.12	0.05	-0.02	-0.01	-0.05	-0.06	-0.04	0	0.27	0.08	0.04	0.05	0.03	0.06	0.02	0.05	-0.11	0.23	-0.07	-0.01	-0.08	0.09	0.02	-0.03	-0.08	-0.08	0.05	0.08	0.02	0.01	0.02	0.01	0.09	-0.01	0.05	-0.02	0.03	-0.04	0.03	0.03	0	0.03	0.07	0.08	-0.02	0.15	0.05
AQP4	-0.02	0.07	0.1	0.12	0.05	0.1	-0.03	0.14	0.12	-0.02	-0.04	-0.01	0.1	0.12	0.09	0.19	-0.03	0.19	0.08	-0.04	0.05	0.17	0.04	0.11	0.09	0.09	0.03	0.08	0.12	0.11	0.11	0.1	0.1	0.05	0.14	0.07	0.01	0	0.27	0.02	0.03	0.07	0.2	0.11	0.04	-0.05	0.13	0.04	0.08
AQP5	0.12	-0.01	0.06	-0.01	-0.07	0.06	-0.13	-0.02	-0.02	0	0.02	-0.01	0.02	-0.01	-0.04	0.04	0.02	0.07	-0.04	-0.03	-0.06	-0.01	-0.05	0	0.08	-0.01	-0.01	0.03	0.03	0.07	0.06	0	0.05	-0.03	0.02	-0.06	0.02	0	-0.03	0.09	0.01	0.01	0.02	-0.08	0.03	0.09	0.06	0	0.03
AQP6	0.09	0.01	0	0.03	-0.03	0.08	-0.04	0.06	-0.04	-0.01	0.09	-0.03	0.05	0.09	-0.04	0.03	-0.05	0.05	-0.06	-0.02	-0.14	0.01	-0.07	0.06	0.03	-0.1	-0.07	-0.02	-0.03	0.02	0.04	0.02	0.12	0.05	0.03	-0.04	0.02	0.06	0.08	-0.01	0.01	0.05	0.03	-0.01	0.01	0.04	0.03	0.07	0.01
AQP7	-0.02	-0.01	-0.03	0.03	0.03	0.06	0.04	0.05	0.01	0.06	0.01	-0.04	0.05	0.06	0	0.01	0.04	-0.03	-0.01	-0.01	-0.06	-0.05	-0.01	0.02	0.09	-0.08	-0.03	-0.05	0.07	0	0.06	0.04	-0.01	-0.03	0.08	-0.01	0	-0.01	0.05	0.07	0.05	0	0.09	-0.03	0.04	0.03	-0.03	0.09	0
AQP8	0.03	0.12	0.13	0.2	-0.02	0.19	-0.08	0.23	0.16	0.02	0.04	0.02	0.15	0.26	0.11	0.22	0.06	0.22	0.15	-0.06	0.03	0.15	0.15	0.12	0.18	0.04	0.02	0.08	0.14	0.17	0.22	0.19	0.02	0.14	0.19	0.12	-0.04	0.01	0.29	0.15	-0.03	0.21	0.28	0.08	0.09	0.05	0.19	0.04	0.02
AQP9	-0.03	0	-0.02	0.07	-0.1	0.04	-0.11	0.04	0.03	0.02	0.01	0	0.01	0.13	0.02	0.05	0.04	0.15	-0.03	-0.08	-0.05	-0.04	-0.02	0.01	0.04	-0.04	-0.01	0.04	0.02	0.06	0.03	0.03	0.04	-0.03	0.06	-0.04	-0.11	0.14	0.09	0.07	-0.02	0.09	0.02	0.03	-0.05	0.03	0.02	0.11	0.01
AQPEP	0.09	0.05	-0.01	0.01	0.06	0.02	-0.05	-0.02	0.02	0.01	0.04	0.04	0.02	0.04	0.03	0	0.02	0.05	0	-0.03	0.06	0	-0.02	0.01	0.02	-0.03	-0.02	-0.02	0.08	0.06	0.01	0.03	-0.2	0	0.04	0.08	0.09	-0.02	-0.05	-0.02	0.01	0	0.01	-0.03	0.04	0.09	-0.01	0.12	0.03
AQR	-0.09	0	0.05	0.26	-0.02	0.13	-0.1	0.1	0.02	-0.02	0.12	0.01	0.26	0.19	0.11	0.17	0.02	0.21	0.1	0	0.11	0.15	0.17	0.19	0.12	0.09	0.07	0	0.14	0.24	0.1	0.15	0.12	0.24	0.22	0.08	-0.01	-0.13	0.19	0.11	-0.08	0.16	0.34	0.1	0.1	0.05	0.08	-0.08	0.19
AR	0	0.04	0.05	-0.04	0.05	-0.01	0.02	0.14	0.03	0.03	-0.15	0.04	0	-0.1	0.06	-0.03	0	-0.03	0.12	-0.14	0	0.06	0.1	-0.01	0.11	0.13	0.11	0.11	0.01	-0.03	0.05	-0.01	-0.07	0.01	-0.01	-0.01	0.08	-0.02	-0.05	0.08	0.07	0.04	0.01	0.03	0	-0.01	0.02	-0.05	-0.05
ARAF	-0.02	0.08	0.05	0.02	-0.13	0.05	-0.15	0.03	0	0	-0.03	0.07	0.04	-0.03	0.11	0.04	-0.1	-0.01	0.01	-0.08	0.06	0.06	0.06	0.07	0.06	0.07	0.01	0.04	0.07	0.03	0.01	0.01	0.09	0.01	0.05	-0.04	0.04	-0.02	-0.05	0.02	-0.01	0.06	-0.01	0.04	0.04	0	-0.02	0.07	-0.04
ARAP1	-0.11	-0.06	0.05	0.07	-0.08	0.1	-0.13	0.03	0.03	0.01	0.17	0	0.06	0.03	0.05	0.14	-0.04	0.1	0.03	-0.06	0.14	0.07	0.01	0.11	0.06	-0.01	-0.02	-0.03	0.06	0.15	0.04	0.04	0.01	0.07	0.09	-0.02	0.01	0.05	0.05	-0.04	-0.01	0.06	0.03	0.03	0.04	0.05	0.06	-0.1	0.08
ARAP2	-0.06	0.04	-0.12	0.05	0	0.01	0.01	0	0.04	-0.02	0.33	0.02	0.03	0.03	-0.01	0.01	0.02	0.03	-0.11	0.22	-0.12	-0.03	-0.15	0.03	0.05	-0.11	-0.2	-0.06	-0.06	0.04	-0.07	-0.05	0.07	0	0.04	0.05	0.03	-0.05	0.07	-0.09	-0.03	-0.01	-0.07	-0.02	0.03	0.13	-0.03	0.01	0.13
ARAP3	-0.08	-0.17	-0.2	-0.14	-0.07	-0.16	0.07	-0.2	-0.14	-0.08	-0.06	-0.02	-0.2	-0.18	-0.09	-0.19	-0.03	-0.2	-0.15	-0.02	-0.02	-0.25	-0.2	-0.14	-0.1	-0.17	-0.08	-0.11	-0.07	-0.1	-0.16	-0.23	-0.04	-0.16	-0.21	-0.16	-0.01	-0.1	-0.31	-0.15	0.07	-0.09	-0.24	-0.14	-0.22	0.04	-0.27	-0.05	0.01
ARC	0.05	-0.05	0.04	-0.02	-0.06	-0.04	0.03	-0.02	-0.08	0.01	-0.11	-0.02	0.02	0.02	-0.04	0.02	-0.01	0.08	0.02	-0.02	0	-0.02	0.04	-0.04	-0.11	0.01	0.03	-0.03	-0.01	-0.02	-0.04	-0.01	-0.11	0.02	-0.05	-0.05	0	0.05	0.03	0.05	-0.06	0.04	0.01	-0.07	-0.01	-0.04	0.03	0.08	0
ARCN1	-0.15	-0.06	0.03	-0.09	-0.06	-0.03	-0.06	-0.09	-0.09	-0.06	-0.08	0.05	-0.1	-0.08	-0.02	-0.08	0	-0.05	-0.09	-0.09	0.04	-0.09	-0.06	-0.03	0	-0.08	0	-0.04	-0.04	-0.08	-0.06	-0.01	0.08	-0.08	-0.03	-0.05	0.03	0.07	-0.15	-0.07	-0.03	-0.06	-0.13	0	-0.03	0.01	-0.04	-0.09	-0.08
AREL1	-0.1	0.03	0.02	0.07	0.01	0.03	-0.06	0.07	0.04	0	0.14	0	0.09	0.1	0.04	0.1	0.06	0.14	0.02	0.11	0.18	0.14	0.02	0.05	-0.04	0.06	-0.06	0.04	0.04	0.08	-0.01	0.05	0.06	0.12	0.04	0.05	0	0.04	0.16	-0.01	-0.01	0.01	0.02	0.03	0.06	0.05	0.01	-0.02	0.1
ARF1	0.03	0.04	0.02	0.07	-0.02	0.04	-0.11	-0.05	0.01	0.04	-0.04	0.04	0.05	-0.07	0.07	0.08	-0.05	-0.06	-0.02	0.12	0	0.11	0.03	0.06	0.05	0.02	0	-0.02	0.06	0.02	0	-0.01	0.07	0.01	0.05	0.01	0.06	0.07	-0.04	0.05	0.03	-0.03	0.02	0.04	0.07	-0.02	-0.01	0.12	-0.01
ARF3	0	-0.07	-0.09	-0.05	-0.04	-0.04	-0.04	-0.1	-0.08	-0.01	-0.07	-0.01	-0.1	-0.03	-0.01	-0.14	-0.1	-0.07	-0.1	0.01	-0.06	-0.12	-0.1	-0.03	-0.04	-0.08	-0.08	-0.03	-0.06	-0.1	-0.05	-0.13	0.26	-0.11	-0.09	-0.1	0.1	0.07	-0.15	-0.06	0.08	-0.09	-0.13	-0.01	-0.01	0.01	-0.18	0.05	-0.07
ARF4	-0.06	-0.17	-0.12	-0.34	0	-0.25	0.14	-0.35	-0.24	-0.07	-0.23	-0.05	-0.38	-0.33	-0.16	-0.35	-0.07	-0.36	-0.19	-0.06	-0.03	-0.3	-0.25	-0.3	-0.15	-0.17	-0.07	-0.04	-0.14	-0.29	-0.21	-0.23	-0.18	-0.36	-0.31	-0.22	0.04	0.09	-0.52	-0.21	-0.01	-0.21	-0.42	-0.21	-0.24	0	-0.26	0	-0.15
ARF5	0.06	0.02	-0.06	-0.15	-0.04	-0.08	0	-0.06	-0.01	0.01	0.05	-0.01	-0.08	-0.09	-0.06	-0.07	-0.06	-0.08	-0.06	0.13	-0.13	-0.03	-0.07	-0.04	-0.1	-0.07	-0.06	0.04	-0.11	-0.14	-0.07	-0.06	0.09	-0.05	-0.11	0.01	0.08	-0.12	0.02	-0.06	0.02	-0.11	-0.12	0	0.01	-0.05	0.01	0	-0.1
ARF6	-0.06	0.05	0.02	0.03	0	0.07	0.03	0	-0.04	-0.06	0.14	0.02	0.02	-0.07	0.03	0.02	0.02	0.06	-0.05	0.06	0.07	0.08	-0.06	0.04	0.03	-0.01	-0.05	0.05	0.03	0.08	0.03	-0.02	-0.04	-0.01	0.01	0.03	0.13	0.03	-0.05	0.01	-0.02	0	-0.03	-0.05	0.05	0.11	0.01	0.06	0.15
ARFGAP1	0.02	-0.1	-0.01	-0.2	-0.04	-0.04	-0.02	-0.15	-0.06	-0.08	-0.12	0	-0.17	-0.1	-0.04	-0.05	-0.11	-0.14	-0.05	-0.13	-0.01	-0.14	-0.11	-0.09	-0.07	-0.17	0.02	0.02	0	-0.06	-0.08	-0.12	0.12	-0.17	-0.12	-0.03	0.02	-0.01	-0.14	-0.09	0.01	-0.06	-0.18	-0.12	-0.08	0.02	-0.07	-0.06	-0.11
ARFGAP2	-0.01	0.05	0.1	0.12	-0.07	0.13	-0.23	0.05	0.09	-0.01	0.14	0.03	0.16	0.16	0.13	0.22	-0.05	0.25	0.08	0.01	0.1	0.14	0.13	0.17	0.07	0.11	0.05	0.01	0.12	0.19	0.11	0.08	0.11	0.19	0.14	0.12	0.03	-0.06	0.2	0.05	0	0.06	0.14	0.07	0.12	0.06	0.16	0	0.03
ARFGAP3	0.08	0.05	0.06	-0.08	0.03	-0.06	-0.05	0.01	0.04	-0.03	-0.11	0	-0.1	-0.04	-0.04	-0.01	0.08	-0.02	0.09	-0.11	0.07	0.02	0.04	-0.1	-0.09	0.05	0.13	0.04	0	0.01	-0.04	0.02	-0.16	-0.1	-0.04	-0.01	0.05	0.06	-0.16	0.02	-0.11	-0.01	-0.07	0.04	0.06	0.04	0.03	-0.01	-0.03
ARFGEF1	0.02	0.01	0.05	0.02	0.03	0.05	-0.03	0.11	0.1	0.03	0.21	0.04	0.08	0.02	0.04	0.1	0.07	0	0	0.11	0.09	0.1	0.02	0.09	0.08	0.02	-0.04	-0.02	0.05	0.09	0.02	0.04	0.09	0.11	0.03	0.01	0.07	0.02	0.1	-0.03	-0.06	0.03	0.01	0.02	0.09	0.11	0	-0.04	0.04
ARFGEF2	-0.15	-0.06	-0.11	-0.19	-0.01	-0.04	-0.04	-0.08	-0.12	-0.09	0.05	0	-0.17	-0.01	-0.04	-0.05	-0.11	-0.12	-0.11	0.01	-0.03	-0.1	-0.19	-0.08	-0.02	-0.1	-0.1	-0.04	-0.04	-0.06	-0.02	-0.09	0.03	-0.16	-0.06	-0.02	0.08	-0.08	-0.07	-0.12	-0.08	-0.06	-0.18	-0.08	0.02	-0.04	-0.05	-0.14	-0.09
ARFIP1	-0.1	-0.04	-0.16	-0.05	0.02	-0.05	0.21	-0.13	-0.11	-0.05	0.04	-0.09	-0.08	-0.05	-0.06	-0.06	-0.03	-0.07	-0.08	0.15	0.03	-0.04	-0.07	-0.01	0.01	-0.01	-0.05	-0.07	-0.06	-0.07	-0.06	-0.07	-0.01	-0.03	-0.05	0.01	0.09	0.07	-0.04	-0.11	0	-0.1	-0.1	-0.02	-0.05	0	-0.09	-0.04	0
ARFIP2	-0.08	-0.04	-0.2	-0.12	0.03	-0.09	0.06	-0.16	-0.19	-0.02	0.03	-0.03	-0.18	-0.06	-0.08	-0.08	-0.06	-0.14	-0.21	0.17	-0.12	-0.17	-0.2	-0.13	-0.03	-0.17	-0.14	-0.07	-0.07	-0.22	-0.09	-0.13	-0.06	-0.18	-0.1	-0.11	-0.07	-0.05	-0.09	-0.07	0.02	-0.14	-0.17	-0.08	-0.11	0	-0.12	0.01	-0.12
ARFRP1	0.01	-0.05	0.07	-0.08	-0.13	0.05	-0.14	-0.06	-0.04	-0.05	-0.04	0.04	-0.05	-0.07	0.02	0.01	-0.06	0.05	0.01	-0.18	0.08	-0.07	-0.02	0.03	0.04	-0.06	0.02	0.04	0.03	0.05	0.02	-0.04	-0.03	-0.08	-0.02	-0.01	0	-0.02	-0.07	-0.05	0.03	-0.08	-0.07	-0.03	0.03	0.06	-0.01	-0.03	-0.08
ARG1	0.05	0.05	0	-0.07	0.1	-0.03	0.15	0	0	0.06	0.03	-0.03	0.04	0.02	0.01	-0.02	-0.04	0	-0.02	-0.03	-0.08	0.01	0.04	-0.02	0.08	0.03	0.01	-0.01	0.04	-0.02	0.04	0.03	-0.17	-0.02	0.01	-0.04	-0.05	0.19	-0.05	0	-0.05	-0.03	-0.05	-0.03	0.02	-0.01	-0.03	0.05	0.03
ARG2	-0.01	-0.03	-0.09	0.1	0.06	-0.04	0.13	-0.08	-0.03	-0.04	0.05	0.04	0.05	0.12	-0.05	-0.01	-0.05	0.07	-0.09	0.21	-0.04	-0.06	0.03	0.04	0	-0.05	-0.07	-0.15	0.05	-0.03	-0.04	0.06	-0.08	0.03	0.1	0.01	0	0.18	0.11	-0.03	0	-0.07	0.06	0.11	-0.01	-0.04	-0.02	0.02	0.04
ARGLU1	-0.05	0.09	0.14	0.28	0.08	0.18	-0.05	0.15	0.2	0.05	0.13	-0.01	0.26	0.3	0.07	0.29	0.07	0.32	0.21	0.02	0.07	0.19	0.21	0.22	0.12	0.15	0.07	0.02	0.13	0.3	0.13	0.19	0.07	0.29	0.27	0.21	-0.12	-0.03	0.39	0.2	-0.05	0.16	0.31	0.08	0.07	0.03	0.22	-0.07	0.14
ARHGAP1	-0.02	-0.06	-0.07	-0.19	-0.06	-0.06	-0.01	-0.12	-0.12	0.01	-0.01	0	-0.18	-0.25	-0.03	-0.18	-0.07	-0.14	-0.05	-0.05	0.01	-0.11	-0.1	-0.11	-0.03	-0.07	-0.02	-0.06	-0.07	-0.17	-0.1	-0.12	0.01	-0.11	-0.2	-0.14	0.14	0.02	-0.32	-0.15	0.03	-0.15	-0.25	-0.15	-0.1	0.03	-0.11	0.03	-0.14
ARHGAP10	0.01	-0.03	0.05	-0.05	0.01	-0.08	-0.08	-0.12	-0.12	0.06	-0.01	-0.05	-0.04	-0.12	0	-0.03	-0.02	0.01	0.03	-0.11	0.08	-0.01	-0.03	-0.07	0.01	-0.04	0.05	0.04	0	0.01	-0.02	-0.05	-0.1	-0.05	-0.07	-0.06	0.01	0.01	-0.12	-0.07	-0.02	-0.01	-0.09	-0.1	0	0.01	-0.08	0.17	0.06
ARHGAP11A	-0.02	0.07	0.07	0.27	0	0.07	-0.16	0.17	0.07	0.03	-0.12	0	0.16	0.18	0.06	0.15	0.11	0.23	0.17	-0.19	0.11	0.14	0.25	0.1	0.11	0.19	0.2	0.03	0.15	0.23	0.1	0.14	0.07	0.2	0.17	0.09	-0.07	-0.06	0.21	0.18	-0.08	0.14	0.32	0.1	0.05	0.01	0.16	-0.09	0.04
ARHGAP12	-0.23	-0.1	-0.24	-0.29	0	-0.14	0.28	-0.23	-0.22	-0.05	0	0	-0.27	-0.23	-0.17	-0.27	0	-0.26	-0.26	0.16	0.02	-0.22	-0.3	-0.13	-0.11	-0.24	-0.18	-0.15	-0.1	-0.21	-0.15	-0.28	-0.03	-0.21	-0.22	-0.1	0.14	-0.06	-0.27	-0.23	0.04	-0.16	-0.31	-0.11	-0.15	0.05	-0.24	-0.19	-0.06
ARHGAP15	0.06	0.15	0.21	0.21	-0.12	0.21	-0.32	0.21	0.23	0.02	-0.04	0	0.22	0.36	0.13	0.39	0.14	0.32	0.29	-0.13	0.08	0.25	0.27	0.14	0.12	0.15	0.18	0.1	0.18	0.27	0.22	0.24	-0.16	0.23	0.2	0.23	-0.05	0	0.35	0.25	-0.07	0.19	0.36	0.07	0.18	0.06	0.31	-0.02	0.03
ARHGAP17	0.01	0.09	0.22	0.08	0	0.12	-0.23	0.15	0.08	0.1	-0.16	0	0.12	0.07	0.06	0.14	0	0.1	0.24	-0.28	0.1	0.17	0.17	0.06	0.09	0.2	0.21	0.15	-0.01	0.16	0.11	0.13	0.17	0.1	0.08	0.07	-0.04	0.03	0.06	0.18	-0.05	0.09	0.13	0.05	0.1	-0.05	0.18	-0.05	0.05
ARHGAP18	-0.01	-0.12	-0.11	-0.18	0.01	-0.12	0.19	-0.25	-0.21	-0.06	-0.13	-0.05	-0.23	-0.27	-0.12	-0.25	-0.04	-0.18	-0.15	-0.02	0.03	-0.2	-0.22	-0.14	-0.03	-0.11	-0.1	-0.11	-0.1	-0.13	-0.1	-0.2	0.13	-0.23	-0.18	-0.1	0.04	0.06	-0.29	-0.19	0.06	-0.1	-0.31	-0.15	-0.12	0.02	-0.17	0.11	-0.06
ARHGAP19	-0.01	0.18	0.21	0.38	-0.01	0.25	-0.15	0.23	0.17	0.07	0.06	-0.01	0.37	0.41	0.16	0.38	0.08	0.41	0.27	-0.09	0.23	0.34	0.36	0.31	0.15	0.25	0.19	0.06	0.28	0.38	0.23	0.3	0.26	0.37	0.37	0.27	-0.06	-0.03	0.45	0.25	-0.05	0.22	0.53	0.21	0.23	0.01	0.3	-0.04	0.2
ARHGAP20	0.1	0.06	0.07	-0.02	-0.01	0.09	0	0.09	0.11	0.03	-0.06	0	0	0	0.03	0.06	-0.01	0.01	0	0.02	-0.04	0.04	0.06	0.01	0.07	0	0.07	0.1	-0.07	-0.03	0.04	0.06	-0.09	0.02	0.01	0.03	0.02	0.05	-0.04	0.09	0.02	0.11	-0.02	0.03	0.04	0.01	0.11	0.1	0.01
ARHGAP21	-0.12	-0.1	-0.15	-0.2	0.13	-0.18	0.27	-0.2	-0.17	-0.01	-0.08	0.03	-0.21	-0.22	-0.15	-0.27	0.01	-0.26	-0.13	-0.04	0.04	-0.19	-0.18	-0.23	-0.11	-0.1	-0.04	-0.06	-0.1	-0.14	-0.12	-0.19	-0.22	-0.28	-0.22	-0.18	0.11	0.09	-0.31	-0.09	0	-0.11	-0.26	-0.13	-0.14	0.02	-0.25	0	-0.09
ARHGAP22	0.01	-0.11	0.03	-0.13	-0.05	-0.11	-0.08	-0.07	-0.08	0	-0.15	-0.03	-0.11	-0.26	-0.03	-0.18	0.03	-0.13	-0.07	-0.16	0.07	-0.13	-0.07	-0.19	-0.06	-0.07	-0.02	-0.03	-0.05	-0.09	-0.11	-0.13	-0.24	-0.16	-0.19	-0.12	0.08	-0.11	-0.28	-0.12	0.02	-0.03	-0.19	-0.16	-0.18	-0.01	-0.18	-0.07	-0.02
ARHGAP23	0.1	-0.07	-0.03	-0.14	0.08	-0.07	0.08	-0.14	-0.16	-0.01	0.04	0.01	-0.1	-0.22	-0.02	-0.17	-0.15	-0.11	-0.15	-0.1	-0.01	-0.16	-0.12	-0.09	-0.16	-0.12	-0.04	-0.02	-0.12	-0.05	-0.15	-0.14	-0.05	-0.12	-0.13	-0.17	-0.01	0	-0.31	-0.1	0.01	-0.07	-0.22	-0.11	-0.1	0	-0.18	0.08	0.07
ARHGAP24	-0.08	-0.06	0.11	-0.09	-0.05	0	-0.01	0.05	-0.01	-0.03	-0.1	-0.1	-0.1	-0.12	0	-0.05	0.06	-0.01	0.03	-0.13	0.07	-0.09	-0.06	-0.14	0.01	-0.05	0.04	0.12	-0.06	-0.06	0.04	0	-0.03	-0.12	-0.08	-0.02	0.07	-0.01	-0.09	-0.06	0.01	-0.02	-0.14	-0.05	-0.12	-0.03	-0.01	-0.1	0.05
ARHGAP25	0.12	0.12	0.12	0.21	-0.05	0.2	-0.25	0.25	0.26	0.05	0.13	0	0.24	0.33	0.09	0.31	0.11	0.34	0.19	-0.06	0.05	0.26	0.22	0.16	0.09	0.18	0.13	0.1	0.11	0.31	0.2	0.21	0.18	0.24	0.28	0.19	0.01	0.02	0.36	0.19	-0.04	0.19	0.29	0.09	0.19	0.11	0.29	0.08	0.13
ARHGAP26	0.05	-0.12	-0.08	-0.07	-0.07	-0.07	0.01	-0.07	0.02	-0.04	0.09	0	-0.06	-0.08	-0.07	-0.05	0.02	-0.02	-0.08	0.07	-0.09	-0.03	-0.13	0.06	0.01	-0.12	-0.06	-0.11	-0.01	0.03	-0.11	-0.11	0	-0.07	-0.01	-0.04	0.01	0.01	0	-0.1	-0.01	-0.04	-0.1	-0.08	0	0.08	-0.06	0	0.01
ARHGAP27	0	0.05	-0.05	0.06	-0.06	0.08	-0.04	-0.01	-0.01	0	0.32	0.02	0.06	0.04	-0.02	0.06	-0.03	0.07	-0.1	0.19	-0.03	0.04	-0.14	0.14	0.06	-0.07	-0.2	-0.05	0.06	0.13	0.03	-0.04	0.18	0.06	0.08	0	0.03	-0.03	0.11	-0.02	0.01	0.03	0.02	-0.04	0.08	0.12	-0.03	0.08	0.11
ARHGAP28	0.1	-0.02	0.01	-0.11	0.02	-0.08	0.01	0.06	0	-0.01	-0.12	-0.01	-0.05	-0.1	0.01	-0.05	-0.01	-0.14	0.01	-0.04	-0.01	-0.03	0.02	-0.05	-0.07	0	0.09	0.06	-0.06	-0.09	0.01	-0.05	-0.15	-0.07	-0.04	-0.04	-0.02	-0.03	-0.11	-0.01	0.03	-0.04	-0.07	-0.01	-0.02	-0.08	-0.02	0.09	-0.06
ARHGAP29	-0.01	-0.18	-0.1	-0.34	0.11	-0.21	0.24	-0.23	-0.2	-0.03	0	-0.02	-0.35	-0.48	-0.12	-0.41	-0.13	-0.41	-0.34	0.05	-0.07	-0.31	-0.37	-0.3	-0.15	-0.3	-0.25	-0.1	-0.18	-0.34	-0.28	-0.27	-0.17	-0.39	-0.32	-0.32	0.09	-0.02	-0.48	-0.28	0.05	-0.21	-0.5	-0.17	-0.29	0.01	-0.4	0.02	-0.1
ARHGAP30	0.09	0.14	0.17	0.24	0	0.22	-0.26	0.22	0.16	0.06	0.2	0.03	0.24	0.29	0.12	0.33	0.09	0.27	0.16	-0.05	0.09	0.25	0.15	0.16	0.15	0.13	0.04	0.1	0.13	0.29	0.22	0.2	0.15	0.19	0.27	0.13	-0.01	0.05	0.31	0.23	-0.06	0.14	0.26	0.08	0.18	0.1	0.23	0.05	0.13
ARHGAP31	0.02	-0.07	0.09	-0.16	-0.04	-0.09	-0.06	-0.12	-0.08	0	-0.31	-0.04	-0.17	-0.08	-0.04	-0.14	0.05	-0.18	0.01	-0.25	0.1	-0.13	-0.05	-0.17	-0.07	-0.04	0.07	0.05	-0.05	-0.09	-0.07	-0.06	-0.17	-0.17	-0.14	-0.11	-0.01	0.08	-0.27	-0.02	-0.02	-0.03	-0.14	-0.1	-0.07	0.01	-0.08	0.02	-0.08
ARHGAP32	-0.08	-0.02	-0.27	-0.11	0	-0.07	0.13	-0.11	-0.09	0.02	0.21	0.06	-0.1	-0.1	-0.09	-0.14	0.01	-0.11	-0.16	0.35	-0.2	-0.09	-0.16	-0.04	-0.11	-0.16	-0.12	-0.09	-0.12	-0.24	-0.15	-0.13	0.04	-0.03	-0.12	-0.01	0.09	-0.01	-0.07	-0.13	-0.01	-0.12	-0.17	0	-0.04	-0.03	-0.1	-0.01	-0.01
ARHGAP33	0.13	0.14	0.21	0.21	-0.04	0.18	-0.14	0.21	0.19	0.06	0.04	0.05	0.22	0.18	0.11	0.24	-0.03	0.23	0.21	-0.11	-0.04	0.21	0.23	0.18	0.12	0.07	0.1	0.13	0.05	0.23	0.17	0.16	0.25	0.22	0.19	0.13	-0.02	0	0.3	0.16	0.03	0.14	0.23	0.11	0.2	0.01	0.26	0.1	0.03
ARHGAP35	0.06	-0.05	-0.04	-0.14	-0.02	-0.03	0.02	-0.03	0.02	0.04	0.01	0.05	-0.09	-0.21	0.03	-0.1	-0.04	-0.15	-0.04	0	-0.07	-0.07	-0.02	-0.09	-0.05	-0.06	0.01	0.04	-0.08	-0.15	-0.09	-0.06	-0.14	-0.1	-0.08	-0.05	0.07	-0.01	-0.2	-0.09	0.08	-0.08	-0.16	-0.01	-0.06	-0.02	-0.09	-0.02	-0.1
ARHGAP36	0.06	0.09	0.12	0.13	-0.01	0.08	-0.15	0.07	0.03	0.07	0.04	0	0.17	0.06	0.05	0.11	-0.02	0.12	0.12	-0.03	-0.01	0.11	0.13	0.1	0.12	0.1	0.04	0.04	0.07	0.14	0.13	0.16	-0.26	0.11	0.14	0.08	-0.07	-0.04	0.14	0.13	0.06	0.04	0.17	0.04	0.09	0.02	0.13	0.09	0.09
ARHGAP39	0.01	-0.01	-0.2	-0.15	0.04	-0.03	0.12	-0.13	-0.07	0.02	0.15	0.05	-0.13	-0.07	-0.08	-0.17	-0.06	-0.08	-0.21	0.25	-0.23	-0.12	-0.18	-0.08	-0.08	-0.08	-0.22	-0.1	-0.1	-0.24	-0.12	-0.12	0.16	-0.11	-0.09	-0.12	0	-0.04	-0.05	-0.16	0.04	-0.11	-0.18	-0.01	-0.05	-0.09	-0.14	0.03	-0.05
ARHGAP4	0.09	0.16	0.23	0.28	-0.08	0.26	-0.26	0.27	0.25	0.04	0.07	-0.02	0.33	0.37	0.15	0.39	0.13	0.35	0.23	-0.03	0.11	0.36	0.3	0.26	0.13	0.27	0.16	0.04	0.21	0.31	0.23	0.29	0.23	0.32	0.31	0.24	-0.01	0.1	0.51	0.23	-0.05	0.17	0.41	0.13	0.25	0.07	0.32	0	0.05
ARHGAP42	0	-0.09	-0.07	-0.25	-0.03	-0.1	0.17	-0.21	-0.09	-0.01	-0.04	-0.05	-0.21	-0.16	-0.1	-0.2	-0.05	-0.16	-0.19	0.05	-0.08	-0.19	-0.25	-0.14	-0.13	-0.16	-0.12	-0.03	-0.06	-0.14	-0.08	-0.18	0.01	-0.22	-0.17	-0.12	0.05	0.11	-0.17	-0.16	0	-0.12	-0.28	-0.1	-0.09	0	-0.18	0.06	-0.04
ARHGAP44	-0.05	0.13	0.03	0.05	-0.07	0.12	-0.18	0.03	0.13	0.03	0.09	0.04	0.1	0.08	0.03	0.12	0.01	0.09	0.06	0.02	0.04	0.09	0.01	0.04	0.05	0.11	-0.01	0.11	0.02	0.03	0.05	0.02	0	0.1	0.05	0.05	-0.04	0.05	0.15	0.07	0.01	0.11	0.11	0.04	0.04	-0.02	0.06	0.02	0.02
ARHGAP5	0.09	-0.04	-0.2	-0.13	0.12	-0.05	0.33	-0.11	-0.07	-0.03	0.07	0.03	-0.16	-0.12	-0.08	-0.19	-0.03	-0.2	-0.22	0.24	-0.05	-0.17	-0.2	-0.1	-0.12	-0.21	-0.13	-0.09	-0.12	-0.2	-0.19	-0.12	-0.04	-0.15	-0.16	-0.07	0.06	0.08	-0.17	-0.14	0.02	-0.11	-0.24	-0.02	-0.09	0.02	-0.15	0.03	0.05
ARHGAP5-AS1	0.14	-0.09	-0.25	-0.19	0.01	-0.08	0.2	-0.17	-0.14	-0.07	0.05	0.03	-0.21	-0.05	-0.11	-0.23	-0.08	-0.16	-0.27	0.22	-0.09	-0.21	-0.29	-0.16	-0.19	-0.27	-0.16	-0.07	-0.1	-0.27	-0.18	-0.2	-0.1	-0.23	-0.21	-0.12	0.08	0.08	-0.16	-0.2	0.08	-0.11	-0.27	-0.07	-0.13	-0.02	-0.21	0.19	-0.05
ARHGAP6	0.01	0	0.1	0.01	0	0.04	-0.1	-0.04	0.02	-0.03	-0.12	-0.09	0	-0.09	-0.02	-0.02	0.02	0.03	0.08	-0.03	0.01	-0.06	0.04	-0.04	-0.02	0.07	0.06	0.02	0.03	0.06	0.05	0.05	-0.08	-0.07	-0.04	-0.09	-0.01	0.03	-0.07	0.07	-0.01	-0.01	0.03	-0.09	-0.02	-0.05	0.01	-0.03	-0.02
ARHGAP9	-0.01	0.19	0.34	0.34	-0.04	0.21	-0.27	0.28	0.26	0.07	0.02	0	0.33	0.4	0.15	0.4	0.11	0.38	0.31	-0.09	0.09	0.32	0.33	0.24	0.17	0.21	0.15	0.1	0.19	0.36	0.26	0.31	0.05	0.32	0.32	0.21	-0.09	0.08	0.44	0.24	-0.02	0.23	0.43	0.15	0.22	0.07	0.31	0.04	0.11
ARHGDIA	0.05	0.04	0.05	0.06	-0.1	0.09	-0.18	0.01	-0.05	0.07	-0.14	-0.06	0.02	0.02	0.03	0.04	-0.03	0.15	0.09	-0.14	0.03	0.09	0.07	0.02	0.01	0.08	0.13	0.07	-0.05	0.01	0.05	-0.01	0.14	0.07	-0.03	0	-0.07	-0.02	0.02	0.07	0.05	0.01	0.02	-0.04	0.03	-0.04	0.08	0.06	-0.01
ARHGDIB	0.05	0.03	0.18	0.15	-0.07	0.18	-0.21	0.14	0.12	0.02	0.21	0	0.22	0.14	0.11	0.28	0.1	0.21	0.14	-0.07	0.09	0.19	0.09	0.15	0.08	0.07	0.02	0.13	0.06	0.3	0.15	0.1	0.23	0.19	0.18	0.1	0	-0.05	0.18	0.14	-0.03	0.1	0.15	0.03	0.12	0.19	0.12	0.02	0.17
ARHGDIG	0.1	0.04	0.04	0.09	-0.01	0.05	-0.03	0.01	-0.04	0.01	0	0.03	0.12	0.11	0	0.05	0.01	0.1	0.03	0.06	-0.02	0.07	0.08	0.06	-0.01	0	-0.03	-0.01	0.04	0	0.07	0.06	-0.05	0.07	0.05	0.05	-0.01	0.01	0.13	0.09	0.01	0.04	0.15	0.03	0.08	-0.03	0.1	0.06	0.04
ARHGEF1	0.14	0.07	0.11	0.18	-0.14	0.15	-0.2	0.07	0.12	0.02	0.01	-0.02	0.17	0.22	0.11	0.23	0.04	0.23	0.15	-0.07	0.01	0.01	0.13	0.15	0.09	-0.01	0.1	0.07	0.11	0.27	0.19	0.11	0.11	0.2	0.17	0.14	-0.04	0.06	0.17	0.13	0.02	0.11	0.19	0.02	0.13	0.09	0.11	0.05	0.07
ARHGEF10	0.07	-0.04	0.01	-0.06	0.04	-0.1	0.09	-0.13	-0.05	0.03	-0.17	0.03	-0.12	-0.2	-0.09	-0.24	0.01	-0.17	-0.02	-0.12	0.04	-0.12	-0.06	-0.15	-0.08	-0.08	0.03	-0.02	-0.04	-0.09	-0.14	-0.09	-0.18	-0.11	-0.21	-0.14	-0.02	0.07	-0.28	-0.03	0.02	-0.07	-0.13	-0.09	-0.11	-0.01	-0.13	0.01	0.02
ARHGEF10L	-0.02	-0.07	-0.16	-0.25	-0.07	-0.13	0.01	-0.17	-0.06	0.02	0.1	0.07	-0.18	-0.32	-0.09	-0.23	-0.12	-0.26	-0.19	0.19	-0.13	-0.12	-0.22	-0.09	-0.1	-0.07	-0.07	-0.04	-0.2	-0.26	-0.21	-0.2	-0.09	-0.16	-0.19	-0.14	0.14	0.01	-0.28	-0.18	0.05	-0.12	-0.31	-0.12	-0.1	-0.07	-0.16	0.01	-0.06
ARHGEF11	0.04	0.01	-0.16	-0.09	-0.01	0.03	-0.03	-0.06	-0.08	0.01	-0.03	0.02	-0.1	-0.08	0.01	-0.07	-0.07	-0.15	-0.07	0.11	-0.11	-0.02	-0.05	-0.01	-0.07	-0.09	0.01	-0.07	-0.04	-0.17	-0.11	-0.08	0.11	-0.1	-0.07	-0.02	0.01	0.01	-0.15	-0.06	0.07	-0.09	-0.1	-0.01	0.02	-0.04	-0.08	0.04	-0.07
ARHGEF12	-0.1	-0.08	-0.08	-0.14	0.02	-0.1	0.15	-0.13	-0.09	-0.03	-0.08	0.01	-0.17	-0.23	-0.08	-0.21	-0.01	-0.15	-0.16	0.09	-0.03	-0.15	-0.12	-0.12	-0.05	-0.09	-0.02	-0.14	-0.05	-0.27	-0.08	-0.09	0.06	-0.19	-0.12	-0.11	0.15	0.15	-0.21	-0.15	-0.01	-0.13	-0.22	-0.02	-0.07	-0.08	-0.15	0.06	-0.09
ARHGEF15	0.06	0.03	0.04	0.08	-0.08	0.11	-0.04	0.1	0.07	0.03	0.02	-0.02	0.13	0.12	0.01	0.11	0.01	0.13	0.07	-0.06	0.05	0.01	0.14	0.06	0.07	-0.04	0.05	-0.01	0.05	0.12	0.11	0.13	-0.02	0.07	0.15	0.02	0	-0.02	0.13	0.08	-0.02	0.08	0.12	0.07	0.07	0.05	0.06	-0.03	0.04
ARHGEF16	-0.04	-0.05	-0.28	-0.1	0.03	-0.07	0.15	-0.21	-0.12	-0.05	0.31	0.02	-0.11	-0.06	-0.12	-0.15	-0.11	-0.08	-0.28	0.35	-0.24	-0.19	-0.27	-0.02	-0.05	-0.17	-0.28	-0.14	-0.08	-0.16	-0.16	-0.19	0.1	-0.09	-0.11	-0.12	0.08	-0.03	-0.05	-0.23	0.04	-0.1	-0.18	-0.07	-0.1	0.03	-0.18	0.01	-0.03
ARHGEF17	0.02	-0.12	0.02	-0.21	0.1	-0.16	0.13	-0.16	-0.18	0.01	0.03	0.04	-0.19	-0.25	-0.01	-0.23	-0.07	-0.27	-0.12	-0.06	0.04	-0.16	-0.16	-0.22	-0.1	-0.07	-0.06	0.05	-0.15	-0.17	-0.15	-0.16	-0.19	-0.24	-0.23	-0.15	0.01	-0.04	-0.29	-0.12	-0.02	-0.11	-0.27	-0.11	-0.11	-0.02	-0.22	0.02	-0.05
ARHGEF18	0	0.04	0.1	0.08	-0.02	0.12	-0.13	0.12	0.03	-0.01	0.08	-0.01	0.09	0.05	0.08	0.12	-0.03	0.1	0.08	-0.14	0.17	0.05	0.02	0.08	0.05	-0.1	-0.02	0.12	0.03	0.17	0.08	0.06	-0.08	0.09	0.12	0.02	-0.07	0.03	-0.03	0.07	0.02	0.06	0.05	0.02	0.02	0.14	0.07	0.04	0.1
ARHGEF19	-0.02	-0.01	-0.11	0	0.05	0.01	0.03	-0.08	-0.1	0.01	0.15	0.04	-0.03	-0.05	0.01	-0.05	0	-0.01	-0.13	0.19	-0.03	-0.1	-0.1	-0.01	-0.09	-0.1	-0.08	-0.06	0.02	0.01	-0.08	-0.1	0.12	-0.02	-0.06	-0.09	0.06	0.07	-0.05	-0.06	0.05	-0.03	-0.07	-0.01	0.03	0.07	-0.11	0.04	0.06
ARHGEF2	0.11	0.09	0.18	0.17	-0.1	0.16	-0.21	0.15	0.17	0.03	-0.14	-0.01	0.2	0.18	0.09	0.28	0.05	0.12	0.24	-0.12	0.13	0.16	0.23	0.12	0.08	0.14	0.17	0.05	0.11	0.22	0.16	0.15	0.06	0.19	0.2	0.16	-0.07	0.05	0.17	0.2	-0.04	0.1	0.25	0.09	0.13	0.02	0.24	0.01	0.02
ARHGEF25	0.05	-0.02	0.04	-0.02	0	0.02	0.04	-0.02	-0.03	-0.01	-0.09	0	-0.01	0.04	-0.04	0	-0.07	0.04	-0.05	-0.02	-0.12	-0.02	-0.04	-0.07	-0.06	-0.04	-0.03	0.03	0.02	-0.03	0.03	0	-0.09	-0.04	-0.06	-0.03	-0.04	-0.08	0.07	0.07	0.03	0.05	0.02	0	-0.01	-0.05	0	0.03	-0.02
ARHGEF26	-0.05	-0.01	-0.1	-0.1	0.04	-0.09	0.2	-0.13	-0.06	-0.03	-0.01	-0.01	-0.11	-0.02	-0.03	-0.08	-0.02	-0.13	-0.13	0.19	-0.06	-0.1	-0.12	-0.1	-0.04	-0.06	-0.13	0.01	-0.05	-0.2	-0.06	-0.1	-0.05	-0.1	-0.12	0.02	0	0	0.01	-0.12	0.08	-0.02	-0.1	0.01	-0.05	-0.03	-0.07	-0.03	-0.1
ARHGEF26-AS1	0.02	-0.01	-0.05	-0.03	0.08	-0.02	0.17	-0.05	0.01	-0.04	0.12	0.02	-0.06	-0.01	-0.07	0.01	-0.03	-0.07	-0.11	0.2	-0.09	0.01	-0.11	-0.06	0	-0.04	-0.12	-0.02	-0.05	-0.11	-0.01	-0.02	0.12	-0.06	-0.03	0.01	0.06	-0.01	0.12	-0.03	0.02	0	-0.03	0	-0.01	-0.04	0.01	0	-0.06
ARHGEF28	-0.01	-0.17	-0.15	-0.34	0.05	-0.24	0.18	-0.25	-0.18	-0.04	0.03	-0.06	-0.32	-0.45	-0.15	-0.4	-0.12	-0.36	-0.3	0.01	-0.13	-0.32	-0.37	-0.24	-0.12	-0.3	-0.25	-0.11	-0.15	-0.28	-0.27	-0.31	-0.19	-0.34	-0.33	-0.25	0.02	-0.04	-0.49	-0.29	0.08	-0.24	-0.44	-0.18	-0.26	-0.02	-0.37	0.11	-0.09
ARHGEF3	-0.07	0.03	-0.09	-0.07	-0.11	0.03	-0.16	0.05	-0.01	-0.03	0.11	-0.01	-0.02	0.02	-0.06	0.04	0.01	0	-0.05	0.14	0.03	0.05	-0.13	0	0.01	-0.05	-0.1	0.01	0.01	-0.02	-0.04	-0.04	0.12	0.01	0.01	-0.01	-0.03	-0.09	0.05	0.01	-0.04	0.05	-0.06	-0.06	0.05	0.02	-0.02	-0.03	0.03
ARHGEF37	-0.06	-0.1	-0.17	-0.14	0.01	-0.07	0.06	-0.06	-0.05	-0.05	0.22	0.04	-0.15	-0.14	-0.07	-0.18	-0.03	-0.13	-0.2	0.22	-0.11	-0.16	-0.25	-0.13	-0.13	-0.15	-0.26	0.04	-0.18	-0.16	-0.09	-0.15	-0.1	-0.15	-0.17	-0.15	0.03	-0.03	-0.14	-0.16	-0.03	-0.14	-0.25	-0.09	-0.09	-0.01	-0.14	0.04	-0.01
ARHGEF38	0.05	0.04	-0.02	-0.04	-0.01	0.05	0	-0.04	-0.05	-0.01	0.04	-0.01	-0.04	-0.01	-0.05	0.03	-0.02	-0.05	-0.06	0.07	-0.1	-0.03	-0.12	-0.03	-0.02	-0.07	-0.08	0.03	-0.03	-0.02	0.02	-0.04	0.08	-0.06	0	-0.03	0.09	0.03	0.05	0.06	-0.04	0.01	-0.03	-0.04	-0.01	0.03	0.02	0.08	-0.04
ARHGEF39	-0.03	0.11	0	0.22	0.06	0.14	0.13	0.07	0.06	0.06	0.16	-0.02	0.13	0.28	0.02	0.18	0.11	0.17	0.02	0.2	-0.05	0.15	0.07	0.09	0.05	0.1	0	-0.03	0.14	0.08	0.07	0.12	0.25	0.14	0.19	0.11	-0.02	-0.08	0.32	0.1	0.02	0.09	0.25	0.09	0.08	0.05	0.17	0.07	-0.01
ARHGEF4	-0.01	-0.11	-0.16	-0.05	-0.03	-0.08	0.1	-0.21	-0.18	0.01	0.17	-0.01	-0.05	-0.06	-0.09	-0.13	-0.16	-0.15	-0.2	0.17	-0.06	-0.15	-0.19	-0.05	-0.14	-0.15	-0.14	-0.04	-0.1	-0.08	-0.06	-0.12	-0.03	-0.05	-0.08	-0.11	-0.06	0.01	-0.1	-0.06	-0.02	-0.02	-0.09	0	-0.07	-0.05	-0.14	0.08	0.08
ARHGEF40	0.07	-0.06	-0.03	-0.15	-0.02	-0.13	-0.01	-0.05	-0.06	0.05	-0.21	0.03	-0.18	-0.19	-0.03	-0.21	0.01	-0.2	0.03	-0.11	0.1	-0.13	-0.02	-0.15	-0.13	-0.07	0.08	-0.03	-0.07	-0.17	-0.15	-0.11	-0.23	-0.11	-0.17	-0.12	0	0.09	-0.32	-0.12	0.03	-0.08	-0.19	-0.09	-0.13	-0.02	-0.15	0.06	-0.04
ARHGEF5	-0.04	-0.13	-0.29	-0.24	0.03	-0.17	0.21	-0.2	-0.15	-0.08	0.28	-0.02	-0.23	-0.24	-0.15	-0.29	-0.13	-0.25	-0.35	0.37	-0.19	-0.28	-0.4	-0.12	-0.12	-0.29	-0.33	-0.09	-0.16	-0.26	-0.21	-0.26	-0.04	-0.24	-0.21	-0.2	0.09	0	-0.24	-0.32	0.07	-0.17	-0.35	-0.13	-0.18	0.04	-0.31	0.04	-0.01
ARHGEF6	0.02	0.06	0.3	0.17	-0.09	0.12	-0.27	0.19	0.18	0.03	-0.21	0	0.21	0.12	0.11	0.29	0.11	0.18	0.32	-0.29	0.15	0.24	0.29	0.06	0.09	0.22	0.25	0.17	0.06	0.25	0.15	0.22	-0.03	0.19	0.14	0.14	-0.04	-0.08	0.17	0.23	-0.06	0.17	0.23	0.03	0.06	0.01	0.25	-0.02	0.03
ARHGEF7	0	0.12	0.09	0.19	0	0.19	-0.12	0.13	0.25	0.05	0.14	0	0.17	0.26	0.07	0.3	0.02	0.24	0.19	0.02	-0.09	0.18	0.17	0.15	0.12	0.12	0.09	0.08	0.03	0.21	0.12	0.18	-0.09	0.21	0.22	0.19	-0.16	0.05	0.33	0.22	-0.07	0.11	0.21	0.07	0.1	0	0.3	0.03	0.08
ARHGEF9	-0.06	0.13	0.22	0.14	-0.04	0.1	-0.09	0.15	0.1	-0.03	-0.04	0.01	0.16	0.17	0.1	0.21	0.02	0.21	0.18	-0.07	0.08	0.25	0.21	0.14	0.06	0.12	0.13	0.15	0.09	0.15	0.12	0.15	-0.12	0.18	0.13	0.17	-0.04	0.08	0.23	0.18	-0.01	0.13	0.23	0.11	0.12	-0.02	0.2	-0.03	-0.04
ARID1A	0.09	0.22	0.24	0.32	0	0.25	-0.19	0.26	0.23	0.07	0.11	0.02	0.37	0.4	0.2	0.41	0.1	0.4	0.27	0.04	0.08	0.38	0.34	0.3	0.09	0.3	0.18	0.08	0.14	0.3	0.2	0.29	0.27	0.37	0.35	0.25	0.05	0.05	0.45	0.26	0	0.17	0.45	0.21	0.31	0.05	0.34	0	0.1
ARID1B	0.1	0.24	0.24	0.28	0.02	0.23	-0.17	0.31	0.27	0.07	0.1	0.02	0.35	0.35	0.16	0.43	0.09	0.36	0.34	0.02	0.13	0.37	0.36	0.29	0.12	0.32	0.24	0.11	0.13	0.31	0.21	0.33	0.33	0.39	0.36	0.27	0	0.07	0.52	0.22	-0.06	0.16	0.43	0.23	0.27	-0.01	0.4	-0.05	0.08
ARID2	0.01	0.15	0.16	0.3	0.07	0.18	-0.08	0.26	0.21	0.08	0.13	0.01	0.33	0.3	0.15	0.35	0.03	0.24	0.24	0.1	0.03	0.33	0.29	0.27	0.15	0.26	0.15	0.03	0.18	0.25	0.21	0.26	0.07	0.29	0.28	0.21	-0.04	0.05	0.46	0.22	0	0.11	0.42	0.21	0.23	-0.01	0.23	-0.03	0.09
ARID3A	0.03	0.16	0.24	0.24	0.04	0.2	-0.08	0.19	0.15	0.02	0.07	0.04	0.27	0.35	0.15	0.33	-0.04	0.32	0.23	0	0.07	0.32	0.29	0.27	0.11	0.28	0.22	0.02	0.15	0.29	0.24	0.28	0.33	0.25	0.33	0.23	0.02	-0.09	0.45	0.15	-0.07	0.16	0.35	0.14	0.16	-0.02	0.28	-0.08	0.08
ARID4A	-0.08	0.11	0.15	0.18	0.03	0.17	-0.04	0.21	0.19	0.03	0.18	0.09	0.25	0.19	0.11	0.28	0.1	0.25	0.16	0.06	0.13	0.29	0.2	0.21	0.15	0.15	0.08	0.08	0.06	0.23	0.15	0.21	0.06	0.27	0.2	0.24	-0.08	-0.02	0.35	0.17	-0.04	0.14	0.26	0.11	0.17	0.01	0.28	-0.09	0.1
ARID4B	-0.02	0.09	0.15	0.17	0.06	0.14	0	0.14	0.18	0.06	0.14	0	0.22	0.11	0.11	0.25	0.09	0.1	0.13	0.05	0.05	0.22	0.17	0.14	0.11	0.09	0.07	0.08	0.02	0.16	0.13	0.14	0.13	0.19	0.18	0.11	-0.04	0.03	0.35	0.15	-0.05	0.13	0.23	0.11	0.06	0.01	0.16	-0.03	0.11
ARID5A	0.09	0.11	0.2	0.2	-0.09	0.15	-0.22	0.14	0.14	-0.01	-0.02	0.01	0.22	0.23	0.13	0.28	0.05	0.28	0.25	-0.16	0.04	0.2	0.25	0.23	0.14	0.17	0.21	0.1	0.18	0.32	0.2	0.19	0.18	0.2	0.23	0.11	-0.11	0.03	0.22	0.17	-0.05	0.18	0.27	0.05	0.16	0.09	0.24	0.05	0.09
ARID5B	0.02	0.02	0.04	-0.11	0.01	0.01	0.03	-0.07	-0.06	-0.03	-0.02	-0.05	-0.03	-0.12	-0.04	-0.08	-0.02	-0.1	0.05	-0.08	0.05	-0.01	-0.04	-0.04	-0.02	0.09	0.09	0.07	-0.08	-0.04	-0.03	-0.04	0.11	-0.02	-0.02	0.01	0.06	-0.02	-0.22	0.02	-0.04	-0.06	-0.1	-0.09	-0.04	0	0.03	0.01	0.04
ARIH1	-0.1	0	-0.03	0.16	-0.01	0.09	-0.03	0.07	0.08	-0.02	0.09	0.02	0.19	0.11	0.09	0.19	-0.07	0.1	0.1	-0.05	0.04	0.15	0.18	0.19	0.06	0.15	0.12	0.02	0.09	0.2	0.12	0.16	-0.01	0.17	0.16	0.11	0.01	-0.14	0.19	0.1	-0.1	0.14	0.25	0.09	0.1	-0.01	0.13	-0.17	0.07
ARIH2	-0.03	0.08	0.11	0.18	-0.04	0.12	-0.21	0	-0.01	-0.03	-0.11	-0.05	0.12	0.3	0.04	0.2	0.05	0.16	0.14	-0.08	0.1	0.14	0.15	0.09	0.08	0.07	0.07	0.01	0.2	0.18	0.13	0.14	0.14	0.14	0.19	0.11	-0.04	-0.04	0.22	0.15	-0.04	0.09	0.25	0.04	0.08	0.04	0.15	-0.07	0.04
ARIH2OS	-0.02	0.11	0.21	0.23	0.02	0.19	-0.12	0.16	0.15	-0.02	-0.04	0.07	0.25	0.29	0.14	0.31	0.03	0.19	0.24	-0.1	0.13	0.25	0.29	0.18	0.11	0.18	0.22	0.06	0.15	0.23	0.18	0.24	0.05	0.22	0.27	0.21	-0.03	-0.02	0.28	0.2	-0.08	0.14	0.36	0.18	0.19	-0.06	0.3	-0.08	0.05
ARL1	-0.21	-0.12	-0.1	-0.23	-0.02	-0.14	0.11	-0.26	-0.14	-0.06	-0.1	-0.06	-0.31	-0.26	-0.12	-0.25	-0.09	-0.27	-0.18	0.04	-0.09	-0.22	-0.2	-0.2	-0.04	-0.08	-0.1	-0.07	-0.07	-0.3	-0.13	-0.15	-0.1	-0.31	-0.19	-0.15	0.12	0.04	-0.32	-0.16	-0.01	-0.12	-0.3	-0.08	-0.11	-0.01	-0.21	-0.08	-0.11
ARL10	0.06	-0.05	0.02	-0.04	0.11	-0.01	0.12	-0.01	-0.04	0.03	0.02	0.02	-0.02	-0.07	-0.03	-0.06	-0.04	-0.06	-0.02	-0.1	-0.07	-0.1	-0.04	-0.07	0.04	-0.04	0.02	0.02	-0.07	0.02	0.06	-0.03	-0.33	-0.11	0	-0.11	-0.03	0.11	-0.11	0.03	0	-0.04	-0.07	-0.08	-0.03	0.02	-0.03	0.02	0.09
ARL11	0.02	0.1	0.06	0.25	0.01	0.17	-0.23	0.21	0.17	0.04	0.21	0.06	0.24	0.3	0.11	0.29	0.08	0.24	0.16	-0.07	0.04	0.22	0.16	0.21	0.15	0.14	0.08	0.09	0.1	0.29	0.16	0.18	-0.08	0.22	0.23	0.16	0.04	-0.09	0.34	0.16	0.01	0.2	0.29	0.02	0.16	0.03	0.21	0.05	0.11
ARL13B	0.04	0	-0.03	0.06	0.06	-0.01	0.15	0.01	-0.04	0	-0.1	-0.03	-0.02	-0.05	0.03	-0.08	0.07	-0.02	-0.01	-0.13	0.1	-0.06	0.09	-0.04	-0.02	-0.05	0	-0.02	0.01	0.02	-0.05	0.02	-0.06	-0.01	0.02	-0.07	0.01	-0.01	-0.11	-0.04	-0.01	0.03	0.04	0.08	-0.08	0.05	-0.08	-0.09	0.08
ARL14	-0.13	-0.12	-0.16	-0.14	0	-0.08	0.1	-0.17	-0.14	-0.05	0.23	0.02	-0.11	-0.08	-0.12	-0.21	-0.03	-0.02	-0.24	0.13	-0.11	-0.2	-0.3	-0.08	-0.11	-0.2	-0.22	-0.04	-0.11	-0.08	-0.07	-0.19	0.06	-0.18	-0.11	-0.13	0	0	-0.11	-0.18	0.01	-0.13	-0.23	-0.11	-0.1	0.01	-0.21	0	0.11
ARL15	0.02	0.01	-0.03	-0.05	0.03	-0.04	0.09	-0.05	-0.05	-0.04	0.01	-0.03	-0.06	0.07	-0.02	0	-0.08	0.03	0.04	0.06	0.06	-0.04	-0.01	0	-0.03	0	0.07	-0.05	0.02	-0.03	-0.04	-0.02	0.04	-0.05	-0.01	0.05	0.03	0.01	0.04	-0.02	0.04	-0.07	0	0.03	-0.06	-0.06	-0.05	0.02	-0.04
ARL16	0.09	0.05	0.1	-0.01	0.07	-0.01	0	0.05	0.07	0.07	-0.04	-0.08	0.05	-0.05	-0.02	0	0.07	0.04	0.06	-0.09	0.02	0.09	0.09	-0.01	0.02	0.17	0.06	0.04	0.02	0.01	-0.06	0.02	-0.18	0.09	-0.03	0.05	-0.04	0.11	0.06	0.01	-0.01	-0.03	0.06	-0.03	0.05	-0.02	0.04	0	-0.01
ARL2	-0.06	-0.08	-0.02	-0.04	-0.04	-0.07	-0.04	-0.06	-0.13	0	-0.15	0.04	-0.09	-0.01	-0.01	-0.18	0.03	-0.03	-0.07	-0.08	0.02	-0.13	-0.07	-0.11	-0.09	-0.01	-0.03	-0.06	0.04	-0.14	-0.05	-0.04	-0.1	-0.16	-0.1	-0.11	-0.02	0	-0.19	-0.1	0.03	-0.08	-0.08	-0.03	-0.13	0	-0.15	-0.04	-0.03
ARL2BP	0	-0.07	-0.02	-0.15	-0.03	-0.07	0.02	-0.13	-0.11	0.02	-0.19	-0.02	-0.21	-0.19	-0.03	-0.22	-0.07	-0.22	-0.08	-0.26	0.06	-0.13	-0.15	-0.17	-0.09	-0.12	-0.03	0.04	-0.09	-0.13	-0.06	-0.13	-0.11	-0.23	-0.21	-0.14	0.02	0.08	-0.36	-0.06	0.03	-0.08	-0.18	-0.11	-0.11	-0.05	-0.14	0.02	-0.08
ARL3	-0.04	0.02	0.08	-0.02	0.06	-0.01	0.01	0.02	0	0.03	-0.16	0.02	-0.01	-0.07	0	-0.06	0.02	0.02	0.07	-0.17	0.09	0.01	0.08	-0.06	-0.02	0.07	0.08	0.03	-0.05	-0.08	0	0.06	0.09	-0.06	0	-0.05	-0.01	-0.06	-0.02	0.06	-0.01	-0.03	0.03	0.07	-0.03	-0.11	-0.04	-0.08	-0.01
ARL4C	0.1	-0.04	0.02	-0.17	0.05	-0.12	0.14	-0.13	-0.05	-0.03	-0.07	-0.04	-0.14	-0.31	-0.13	-0.27	-0.02	-0.22	-0.05	-0.02	-0.01	-0.18	-0.15	-0.1	-0.13	-0.18	-0.07	-0.03	-0.08	-0.16	-0.15	-0.17	-0.07	-0.16	-0.21	-0.11	0.07	0.01	-0.3	-0.09	-0.02	-0.16	-0.24	-0.14	-0.12	-0.01	-0.14	-0.04	-0.02
ARL4D	0	-0.16	-0.14	-0.22	0.1	-0.24	0.12	-0.25	-0.24	0.03	-0.07	-0.05	-0.2	-0.3	-0.05	-0.31	-0.12	-0.26	-0.19	-0.1	-0.02	-0.25	-0.21	-0.2	-0.18	-0.08	-0.08	-0.02	-0.14	-0.17	-0.2	-0.22	-0.15	-0.21	-0.26	-0.26	-0.03	-0.03	-0.38	-0.19	-0.02	-0.09	-0.3	-0.14	-0.23	-0.04	-0.28	-0.03	0.03
ARL5A	-0.05	0.08	0.11	0.23	-0.06	0.18	-0.19	0.23	0.13	0.02	-0.01	-0.03	0.2	0.3	0.06	0.26	0.05	0.25	0.13	0.03	0.04	0.19	0.17	0.16	0.12	0.11	0.15	0.02	0.1	0.21	0.2	0.18	0.06	0.17	0.22	0.16	-0.03	0	0.36	0.17	0.02	0.17	0.32	0.14	0.2	-0.02	0.21	-0.07	0.04
ARL5B	-0.08	0.06	-0.03	0.08	0.06	0.05	0.13	-0.03	0.01	0.03	0.03	-0.05	0.09	0.12	-0.01	0.06	-0.03	0.1	-0.02	0.1	0.08	0.08	0.05	0.07	0.09	0.08	0	-0.09	0.1	0.07	0.09	0.06	0.08	0.03	0.14	0.06	0.05	0.06	0.14	0.04	-0.02	-0.01	0.12	0.08	0.06	0.03	0.03	-0.01	0.03
ARL6	-0.05	0	-0.08	0.01	0.03	-0.04	0.22	-0.02	-0.02	0	-0.06	-0.03	-0.03	0.08	-0.02	-0.04	0.03	0.03	-0.05	0.02	-0.02	-0.08	-0.01	-0.07	-0.01	-0.07	-0.06	-0.03	0	-0.08	-0.03	0.02	-0.09	-0.03	0.02	-0.03	-0.01	0.09	0.03	0	0.04	-0.03	0.07	0.06	-0.04	-0.04	-0.03	-0.05	-0.06
ARL6IP1	-0.02	0.02	-0.1	-0.09	0.05	-0.07	0.12	0.01	0.03	0.07	0.04	0.01	-0.13	-0.24	-0.04	-0.15	-0.01	-0.13	-0.12	0.1	-0.15	-0.05	-0.11	-0.09	-0.03	-0.06	-0.11	-0.01	-0.07	-0.12	-0.13	-0.1	0.04	-0.08	-0.12	-0.04	0.09	0.06	-0.12	-0.13	-0.04	0	-0.19	-0.02	-0.11	-0.02	-0.09	-0.03	-0.06
ARL6IP4	-0.02	0.04	0.19	0.2	-0.08	0.09	-0.2	0.06	0.11	0.01	-0.09	-0.03	0.14	0.12	0.08	0.2	0	0.12	0.12	-0.08	0.12	0.13	0.14	0.09	0.05	0.1	0.11	0.03	0.1	0.15	0.12	0.09	0.05	0.11	0.13	0.11	-0.07	0.03	0.21	0.11	0.02	0.05	0.18	0.06	0.12	-0.05	0.11	0	0.01
ARL6IP5	-0.1	-0.08	-0.02	-0.18	-0.04	-0.07	-0.06	-0.1	-0.12	-0.03	-0.09	-0.03	-0.14	-0.23	-0.06	-0.12	-0.03	-0.18	-0.05	-0.07	0.1	-0.09	-0.15	-0.12	0.03	0.01	-0.03	0.07	-0.06	-0.13	-0.08	-0.15	0	-0.16	-0.15	-0.08	0.12	-0.02	-0.17	-0.06	-0.01	-0.07	-0.21	-0.13	-0.06	0.07	-0.11	-0.01	-0.01
ARL6IP6	-0.08	0.07	0.18	0.25	0.03	0.12	-0.07	0.19	0.15	0.06	0.02	0.01	0.24	0.13	0.07	0.2	0.17	0.22	0.11	-0.05	0.12	0.16	0.2	0.11	0.11	0.16	0.11	-0.03	0.12	0.21	0.09	0.16	-0.01	0.21	0.18	0.12	-0.04	-0.02	0.27	0.15	-0.03	0.1	0.28	0.13	0.11	0.06	0.18	-0.15	0.14
ARL8A	0.04	0.04	-0.01	0	-0.03	0.05	-0.14	0.11	0.1	0.06	0.04	0.02	0.06	0	0.04	0.09	0.01	-0.04	0.08	0.02	0.01	0.17	0.05	0.09	0	0.11	0.05	0.02	-0.05	0.01	0.01	0.07	-0.05	0.05	0.03	0.01	0.01	0	0.05	0.03	-0.07	0	0.04	0.02	0.01	-0.04	0.11	0.09	0.05
ARL8B	-0.03	-0.01	0.01	-0.04	-0.09	0.01	-0.16	-0.09	-0.01	-0.03	-0.04	-0.01	-0.06	0	0.05	0.07	0.06	-0.01	0.03	-0.19	0.19	0.01	0.04	-0.02	0.05	0.11	0.08	0.05	0.05	0.03	-0.01	-0.02	-0.29	0	-0.06	-0.01	0.03	-0.05	-0.06	-0.05	-0.04	0.06	-0.04	-0.07	-0.07	0.07	0.01	-0.03	-0.03
ARL9	-0.19	-0.01	0	0.04	-0.02	-0.01	0.05	0.04	-0.03	0	-0.06	-0.01	-0.03	0.08	-0.02	0	0.1	0.11	0	-0.05	-0.04	0	0	-0.04	-0.03	-0.02	-0.05	0.06	-0.08	0.04	0.04	0.01	-0.09	0	-0.01	0.01	0	-0.04	0.03	0.06	-0.02	0.04	0.03	0	0.05	0.07	0.08	-0.08	0.06
ARMC1	-0.05	0.08	0.11	0.17	0.07	0.08	-0.01	0.17	0.12	0.01	-0.04	0.01	0.12	0.13	0.1	0.16	0.06	0.18	0.14	-0.08	0.07	0.12	0.16	0.1	0.06	0.1	0.08	0.03	0.14	0.13	0.15	0.13	0.1	0.13	0.13	0.13	-0.03	-0.04	0.18	0.11	-0.06	0.13	0.19	0.1	0.14	0.03	0.14	-0.14	0.02
ARMC10	-0.02	-0.03	-0.1	-0.01	-0.16	0.02	-0.21	0.09	0.02	0	0.01	-0.02	0.01	0.03	0.01	0.01	0.01	0.01	0.02	0.05	0.04	0.01	-0.02	0.11	0.05	-0.16	-0.09	-0.07	0.03	-0.01	0.04	0.04	0.13	0.06	0.01	0.05	0.03	-0.11	0.06	0.01	0.05	-0.06	0.04	0.01	0.04	0.01	0.02	-0.12	-0.05
ARMC12	0.15	0.15	0.12	0.18	-0.04	0.15	-0.16	0.1	0.11	0.05	0.08	0	0.24	0.21	0.04	0.24	0.01	0.24	0.14	-0.05	0.1	0.18	0.21	0.13	0.17	0.13	0.09	0.06	0.14	0.18	0.16	0.23	0.01	0.22	0.21	0.14	-0.1	0.02	0.25	0.19	0.02	0.17	0.29	0.09	0.19	0.04	0.21	0.07	0.11
ARMC2	-0.06	0.05	0.03	0	-0.02	0.03	-0.05	0.08	0.02	0.01	0.09	0	0.03	0.1	0	0.06	0	0.08	0.04	0.01	0.01	0.06	0	0.03	-0.01	0.09	-0.02	0.04	0.04	0	0.04	0.07	0.11	0.04	0.06	-0.01	0.02	-0.03	0.2	0	-0.08	0.06	0.03	0.02	0.03	-0.01	0.05	-0.11	-0.01
ARMC3	0	0.05	0.06	0.07	0.03	0.08	-0.08	0.07	-0.03	0.01	-0.04	0	0.04	0.11	0.03	0.06	-0.04	0.09	0	-0.08	0.07	0.07	0.03	0.06	0.05	0.04	-0.03	-0.01	0.04	0.08	0.06	0.04	0.08	0.05	0.08	0.01	0.04	-0.06	0.12	0.04	0.02	0.12	0.08	0	0.02	-0.03	0.09	-0.05	-0.04
ARMC4	0.07	-0.01	0.18	0.01	0.03	-0.02	0.06	0.07	0.03	0.03	-0.17	-0.02	0.03	-0.1	-0.02	-0.07	0.04	-0.01	0.03	-0.15	0.1	0	0.02	-0.04	0.02	0.03	0.04	-0.03	0.02	-0.01	-0.03	0.01	-0.01	-0.02	0.01	-0.05	0.01	0.05	-0.07	0.03	0	0.02	0.02	0	-0.05	-0.02	-0.07	0	0
ARMC5	0.07	0.06	0.02	0.11	-0.09	0.09	-0.23	0.02	0.01	0.05	0.04	0.02	0.07	0.09	0.04	0.09	0.01	0.12	0.02	0.01	-0.1	0.06	0.04	0.07	0.06	0	-0.01	0.02	0.04	0.07	0.1	0.06	0.22	0.06	0.05	0.05	-0.07	0.01	0.1	0.03	0.04	0.03	0.06	-0.01	0.12	0.03	0.09	0.11	-0.01
ARMC6	0.12	0.11	0.16	0.22	-0.07	0.16	-0.13	0.12	0.1	0.05	-0.09	-0.02	0.19	0.16	0.12	0.2	0.03	0.19	0.14	-0.04	0.01	0.11	0.21	0.13	0.06	0.01	0.06	0.03	0.17	0.2	0.2	0.14	0.12	0.2	0.2	0.12	-0.11	-0.02	0.2	0.2	0.04	0.11	0.27	0.06	0.11	0.05	0.17	0.1	0
ARMC7	0.02	-0.06	-0.14	-0.05	-0.03	-0.04	0.09	-0.08	-0.08	0.03	0.12	-0.02	-0.02	-0.12	-0.03	-0.1	-0.07	-0.08	-0.17	0.13	-0.07	-0.08	-0.13	0.01	0.03	-0.14	-0.16	-0.07	-0.04	-0.08	-0.05	-0.13	-0.01	-0.05	-0.05	-0.14	0.08	0.03	-0.04	-0.14	0.08	-0.01	-0.06	-0.03	-0.03	0.04	-0.2	0.04	-0.01
ARMC8	-0.1	0.06	0.09	0.16	-0.01	0.08	-0.12	0.12	0.08	0.02	0.02	-0.06	0.14	0.2	0.04	0.2	0.1	0.18	0.11	-0.04	0.1	0.12	0.18	0.09	0.01	0.11	0.06	0.03	0.11	0.19	0.07	0.15	-0.06	0.18	0.15	0.13	-0.01	-0.04	0.25	0.05	-0.06	0.07	0.21	0.09	0.07	-0.02	0.16	-0.11	0.06
ARMC9	-0.11	-0.08	-0.11	-0.22	0.01	-0.15	0.14	-0.19	-0.19	-0.03	-0.25	-0.09	-0.24	-0.23	-0.07	-0.26	-0.04	-0.25	-0.07	-0.15	0.02	-0.22	-0.18	-0.2	-0.12	-0.21	-0.07	0.04	-0.14	-0.29	-0.13	-0.16	-0.02	-0.23	-0.23	-0.16	0.04	0.01	-0.35	-0.11	0.06	-0.17	-0.27	-0.14	-0.19	-0.07	-0.22	-0.07	-0.06
ARMCX1	0	-0.06	0.01	-0.15	-0.01	-0.11	0.05	-0.02	-0.04	0	-0.23	-0.02	-0.17	-0.16	-0.05	-0.1	0.02	-0.13	0.03	-0.1	0.05	-0.1	0.03	-0.14	-0.07	0	0.11	0.01	-0.06	-0.09	-0.07	-0.04	-0.19	-0.09	-0.18	-0.06	0.06	-0.08	-0.17	0	0.04	-0.09	-0.14	-0.08	-0.09	-0.04	0	0	-0.11
ARMCX2	0.05	0	0.1	-0.1	0.05	-0.07	0.2	0.02	-0.04	0	-0.18	-0.01	-0.11	-0.2	-0.04	-0.07	0.01	-0.13	0.02	-0.05	0.05	0	0.01	-0.14	-0.03	-0.01	0.09	0.06	-0.09	-0.08	-0.06	-0.05	-0.11	-0.05	-0.11	-0.01	-0.02	-0.12	-0.15	0.08	0.02	-0.06	-0.12	-0.02	-0.02	-0.09	0.01	0	-0.07
ARMCX3	-0.06	-0.08	0.05	-0.18	0	-0.11	-0.01	-0.01	-0.05	0.02	-0.22	-0.04	-0.17	-0.19	-0.07	-0.07	-0.03	-0.18	-0.07	-0.12	0.03	-0.05	-0.06	-0.13	-0.05	-0.03	0.04	0.03	-0.07	-0.16	-0.07	-0.06	-0.13	-0.16	-0.14	-0.09	-0.01	-0.07	-0.18	-0.03	-0.06	-0.04	-0.19	-0.09	-0.07	-0.12	-0.03	-0.13	-0.13
ARMCX4	-0.07	0.07	0.13	0.08	0.06	0.04	0.06	0.08	0.05	0.05	-0.05	0.01	0.07	0.01	0.04	0.08	0.04	0.04	0.06	-0.03	0.16	0.14	0.14	0.03	0.02	0.01	0.11	0.01	0.03	0.05	0.03	0.09	-0.04	0.11	0.03	0.01	-0.02	0	0.07	0.1	-0.03	0.06	0.06	0.02	0.03	0.01	0.12	-0.04	0.05
ARMCX5	-0.04	0.02	-0.07	0.03	-0.02	0.01	0	0.1	0	0.03	0.03	-0.02	-0.02	0.1	-0.02	-0.02	-0.03	0.02	-0.02	0.23	-0.02	-0.06	0.04	0.02	-0.05	-0.03	-0.05	-0.07	0.03	-0.07	-0.05	0	0.03	0.04	-0.05	0	0.1	0.02	0.04	-0.07	0.05	0.01	-0.01	0.06	0.04	0.02	-0.04	-0.03	-0.03
ARNT	0.01	0.13	0.19	0.24	0	0.16	-0.15	0.17	0.07	0.05	-0.02	0.04	0.28	0.3	0.15	0.29	0.03	0.16	0.24	-0.11	0.15	0.26	0.27	0.2	0.16	0.26	0.23	0.08	0.13	0.25	0.2	0.26	0.14	0.21	0.27	0.13	0	0.01	0.3	0.19	-0.07	0.19	0.33	0.18	0.18	-0.04	0.23	-0.07	0.1
ARNT2	0.04	-0.05	-0.07	-0.22	-0.04	-0.16	0.06	-0.11	-0.05	0.01	-0.16	-0.03	-0.24	-0.18	-0.06	-0.2	-0.02	-0.27	-0.11	0	-0.08	-0.08	-0.14	-0.19	-0.19	-0.1	0	-0.02	-0.15	-0.25	-0.16	-0.21	-0.18	-0.2	-0.23	-0.08	-0.06	-0.05	-0.21	-0.11	0.03	-0.12	-0.23	-0.06	-0.12	-0.1	-0.09	0.03	-0.17
ARNTL	0.05	0.07	0.04	-0.04	0.04	-0.06	-0.06	0.05	0.06	0.01	-0.04	0.07	-0.03	-0.13	0.02	-0.01	-0.01	-0.06	0.02	-0.03	0.03	-0.02	-0.02	-0.09	0	-0.05	0.04	0.03	-0.02	-0.04	-0.09	-0.03	-0.13	-0.08	-0.04	-0.04	0.05	0.09	-0.12	-0.01	-0.02	0.02	-0.08	0.04	-0.02	0.04	-0.07	0.09	0
ARNTL2	-0.08	-0.09	-0.08	-0.04	0.07	-0.13	0.14	-0.13	-0.13	0.02	0.09	-0.02	-0.13	-0.18	-0.08	-0.24	0.05	-0.05	-0.2	0.03	0	-0.18	-0.24	-0.14	-0.07	-0.16	-0.17	-0.08	-0.04	-0.07	-0.14	-0.14	0	-0.19	-0.14	-0.2	0.02	-0.01	-0.23	-0.15	0.03	-0.12	-0.2	-0.1	-0.13	0.06	-0.27	0.03	0.15
ARPC1A	-0.04	-0.12	-0.21	-0.24	-0.06	-0.18	0.11	-0.13	-0.16	-0.03	-0.11	0	-0.29	-0.25	-0.14	-0.27	-0.05	-0.29	-0.22	0.06	-0.12	-0.25	-0.26	-0.22	-0.1	-0.29	-0.15	-0.03	-0.16	-0.31	-0.15	-0.24	-0.09	-0.25	-0.32	-0.13	-0.01	-0.05	-0.28	-0.13	0.09	-0.17	-0.33	-0.14	-0.18	-0.08	-0.23	0.04	-0.11
ARPC1B	-0.08	-0.07	-0.06	-0.09	-0.17	-0.01	-0.18	-0.07	-0.06	-0.04	-0.06	0	-0.12	-0.05	0.03	-0.06	-0.01	-0.08	-0.08	-0.1	0.05	-0.12	-0.17	-0.06	0	-0.18	-0.14	0.09	-0.05	-0.01	-0.01	-0.15	0.09	-0.1	-0.12	-0.04	0.05	-0.04	-0.15	-0.07	0.1	-0.03	-0.14	-0.08	-0.04	0.1	-0.09	-0.07	-0.05
ARPC2	0	-0.01	0.09	0	-0.06	0.09	-0.09	-0.02	-0.06	0.01	-0.02	-0.04	-0.02	0.01	0.03	0.01	0.03	0.1	0.03	-0.19	0.13	-0.04	-0.06	-0.07	0.01	-0.06	0.02	0.05	-0.05	0.1	0.04	-0.04	0.12	-0.01	0.01	-0.07	0	-0.06	-0.09	0.05	0.03	-0.01	-0.03	-0.12	-0.03	0.09	-0.02	0.01	0.12
ARPC4	-0.03	0	0.05	-0.01	-0.08	0.07	-0.1	-0.09	-0.05	0	-0.07	-0.07	-0.04	0.01	0	0.03	0.03	0.08	0.05	-0.15	0.1	0	0.01	-0.02	0.02	0.07	0.03	0.06	0	0.05	0.02	-0.06	0.12	0.02	-0.06	-0.02	0.02	-0.08	-0.05	-0.01	0.03	0	0	-0.08	-0.05	0.09	0.02	0.02	-0.04
ARPC5	0.07	0.08	0.12	0.09	0	0.08	-0.09	0.08	0.1	0.03	-0.13	-0.03	0.11	0.01	0.05	0.11	0.05	0.1	0.2	-0.15	0.16	0.14	0.13	0	0.05	0.13	0.16	0.11	0.02	0.14	0.05	0.07	0.05	0.08	0.12	0.05	0.01	0.04	-0.01	0.15	-0.01	0.06	0.1	0.01	0.06	0.07	0.1	0.1	0.07
ARPC5L	-0.06	0.08	0.02	0.11	0	0.09	-0.04	0	-0.05	-0.04	0.09	-0.02	0.06	0.13	0.01	0.13	0.02	0.21	-0.02	0.03	0.06	0.04	-0.03	0.03	0.08	-0.04	-0.09	0.08	0.03	0.08	0.12	0.04	0.11	0.02	0.14	-0.02	0.07	0	0.17	0.08	-0.02	0.06	0.09	0.04	0.08	0.09	0.05	0.1	0.1
ARPP19	-0.09	0.07	-0.06	0.07	0.01	0.05	-0.02	0.07	0.07	0	-0.06	-0.05	0.05	0.09	0.02	0.13	-0.01	0.08	0.01	0.03	0.02	0.13	0.07	0.04	0.03	0.11	0.06	-0.02	-0.02	0.01	0.03	0.06	0	0.07	0.05	0.01	-0.06	-0.11	0.16	0.08	-0.07	0.03	0.12	0.04	0.04	-0.01	0.07	-0.11	0.04
ARPP21	0.14	0.1	0.2	0.14	-0.01	0.17	-0.13	0.2	0.14	0.04	-0.02	-0.02	0.2	0.2	0.1	0.23	0.09	0.22	0.18	-0.14	0.05	0.14	0.19	0.1	0.07	0.06	0.14	0.11	0.13	0.16	0.16	0.16	0.08	0.15	0.14	0.17	-0.07	0.06	0.23	0.18	-0.05	0.08	0.23	0.11	0.15	0.03	0.22	0.06	0.05
ARR3	0.03	0.06	0.08	0.11	-0.07	0.13	-0.07	0.12	0.07	0.03	-0.05	0.05	0.09	0.04	0.09	0.12	0.01	0.04	0.06	-0.07	-0.02	0.08	0.06	0.1	0.05	-0.05	0	0.05	0.12	0.13	0.13	0.13	-0.09	0.08	0.14	0.09	-0.07	0.01	0.09	0.11	0.08	0.14	0.11	0.09	0.07	0.07	0.07	0.08	0
ARRB1	-0.01	-0.01	-0.02	-0.03	-0.05	-0.02	0.05	-0.02	0.06	0.07	0.08	0.04	-0.01	-0.06	-0.04	0.04	0.03	-0.09	-0.02	0.21	-0.06	0	0.05	0.05	-0.03	0.02	-0.04	-0.1	0.05	-0.03	-0.03	-0.03	0.07	0.06	-0.05	0.09	0.06	-0.03	0.05	-0.07	0.04	-0.03	-0.01	0.01	0.04	0.08	-0.02	-0.06	-0.15
ARRB2	0.01	0.12	0.15	0.3	-0.01	0.21	0.03	0.17	0.19	0	0.01	0.02	0.31	0.27	0.15	0.29	-0.06	0.26	0.18	0.05	0.07	0.21	0.25	0.22	0.08	0.15	0.08	-0.02	0.18	0.23	0.09	0.18	0.2	0.27	0.28	0.15	-0.02	-0.04	0.35	0.15	-0.02	0.14	0.38	0.19	0.17	-0.02	0.2	0.01	0.05
ARRDC1	-0.11	-0.04	-0.19	-0.08	-0.06	-0.03	0.03	-0.12	-0.13	-0.05	0.27	0.02	-0.1	-0.14	-0.04	-0.08	-0.1	-0.07	-0.22	0.22	-0.07	-0.08	-0.25	0.02	0.04	-0.21	-0.29	-0.07	-0.03	-0.08	-0.09	-0.14	0.09	-0.07	-0.07	-0.09	0.09	-0.1	-0.08	-0.18	0.05	-0.05	-0.19	-0.06	-0.06	0.08	-0.16	0.02	-0.02
ARRDC2	0.04	0.03	0.01	0.17	-0.1	0.09	-0.22	0.16	0.1	0.04	0.06	0.02	0.15	0.11	0.09	0.16	0.06	0.11	0.11	-0.07	0.05	0.11	0.03	0.18	0.09	-0.03	-0.09	0.05	0.09	0.21	0.08	0.06	0.21	0.16	0.13	0.05	-0.01	0.04	0.16	0.06	0.04	0.12	0.13	0.07	0.07	0.11	0.03	-0.01	0.09
ARRDC3	-0.02	-0.02	0.06	-0.16	0.05	-0.12	0.01	0.08	-0.05	0.03	-0.02	0.01	-0.07	-0.19	-0.02	-0.16	0.02	-0.15	-0.01	-0.08	0.06	0.04	-0.05	-0.09	0	-0.01	0	0.07	-0.12	-0.01	-0.06	-0.08	-0.17	-0.09	-0.14	-0.12	0.07	-0.04	-0.17	-0.1	0.01	-0.07	-0.17	-0.07	-0.07	-0.04	-0.09	0	0.01
ARRDC3-AS1	0	0.02	0.01	0.14	-0.01	0.06	0.04	0.03	-0.01	-0.05	0.02	0	0.09	0.21	0.02	0.09	0	0.18	0.07	-0.09	0.03	0.05	0.08	0.12	0.08	-0.02	-0.04	-0.04	0.11	0.16	0.11	0.11	0.12	0.13	0.17	0.1	-0.01	0.1	0.13	0.08	-0.02	0.13	0.21	0.1	0.08	0.07	0.12	0.08	0.02
ARRDC4	-0.01	-0.11	-0.22	-0.15	-0.04	-0.12	0.04	-0.1	-0.08	-0.01	0.1	0.03	-0.12	-0.15	-0.1	-0.13	-0.01	-0.21	-0.13	0.13	-0.16	-0.08	-0.14	-0.03	-0.13	-0.07	-0.07	-0.12	-0.16	-0.17	-0.2	-0.11	-0.25	-0.12	-0.18	-0.1	0.05	-0.01	-0.14	-0.14	-0.03	-0.14	-0.16	-0.08	-0.09	-0.06	-0.1	-0.02	-0.12
ARSA	0.02	-0.11	-0.05	-0.1	-0.17	-0.08	-0.1	-0.08	-0.1	-0.07	-0.02	-0.05	-0.17	-0.04	-0.04	-0.07	-0.08	-0.07	-0.01	-0.16	0.06	-0.12	-0.14	-0.03	-0.03	-0.14	-0.04	0.03	-0.03	-0.04	-0.02	-0.07	0.07	-0.11	-0.09	-0.11	0.08	0.09	-0.19	-0.06	-0.05	-0.02	-0.13	-0.08	-0.05	0.05	-0.06	0.08	0.01
ARSB	0.11	0.02	0.09	0.02	-0.04	0.02	-0.11	0.03	0	0.03	-0.22	0.01	-0.04	0.04	0.05	-0.02	0.06	0.04	0.13	-0.27	0.12	0.05	0.1	-0.06	0.04	0.09	0.19	0.05	0.07	0.04	0.03	0.05	-0.06	-0.03	-0.01	0.04	0.01	0.01	-0.13	0.01	0.01	0.04	0.05	0.05	0	0	0.05	0.07	-0.01
ARSD	-0.15	-0.12	-0.15	-0.26	-0.03	-0.16	0.06	-0.09	-0.09	-0.03	0.05	-0.02	-0.2	-0.32	-0.15	-0.26	0.01	-0.35	-0.18	0.09	-0.08	-0.17	-0.26	-0.11	-0.11	-0.14	-0.17	-0.03	-0.17	-0.24	-0.18	-0.26	-0.21	-0.15	-0.26	-0.18	0.08	-0.14	-0.3	-0.2	0.02	-0.16	-0.32	-0.15	-0.17	0.06	-0.23	-0.05	-0.06
ARSE	-0.11	-0.06	-0.03	-0.13	-0.05	-0.06	0.11	-0.05	-0.01	-0.04	-0.17	-0.11	-0.15	-0.14	-0.11	-0.11	0	-0.14	-0.02	-0.02	-0.16	-0.13	-0.13	-0.07	-0.02	-0.1	0	-0.03	-0.01	-0.07	-0.08	-0.09	0.04	-0.13	-0.09	-0.03	0.02	-0.04	-0.1	-0.05	0.01	-0.09	-0.12	-0.12	-0.1	0.02	-0.06	-0.11	-0.1
ARSF	0.02	0.03	0.08	0.15	0.02	0.13	0.06	0.05	0.07	0.03	0.06	0.01	0.18	0.08	0.03	0.19	-0.01	0.13	0.1	-0.07	-0.01	0.08	0.11	0.12	0.15	-0.04	0.06	0.07	0.08	0.18	0.14	0.13	0	0.1	0.17	0.06	0	0.06	0.14	0.17	0.01	0.11	0.22	0.05	0.08	0.09	0.14	0	0.11
ARSG	0.01	0.09	0.06	0.1	-0.06	0.13	-0.13	0.07	0.05	-0.03	0	0	0.07	0.18	0.08	0.21	0	0.15	0.13	-0.04	0.06	0.14	0.11	0.1	0.11	0.09	0.04	0.03	0.08	0.12	0.13	0.11	0.22	0.11	0.13	0.21	0	-0.03	0.23	0.09	-0.05	0.08	0.18	0.06	0.13	0.02	0.23	-0.04	0
ARSI	0.08	-0.07	-0.07	-0.16	0.07	-0.12	0.04	-0.12	-0.15	0.02	-0.02	-0.01	-0.11	-0.09	-0.02	-0.14	0	-0.06	-0.05	-0.11	-0.04	-0.15	-0.12	-0.16	-0.08	0	0.01	0.06	-0.09	-0.05	0.01	-0.1	-0.02	-0.12	-0.14	-0.14	-0.09	0.05	-0.21	-0.06	-0.04	-0.06	-0.12	-0.13	-0.06	0.02	-0.07	0.08	0.04
ARSJ	0.04	-0.17	-0.13	-0.26	0.06	-0.21	0.14	-0.24	-0.22	-0.04	-0.13	-0.03	-0.28	-0.39	-0.12	-0.43	-0.06	-0.3	-0.16	-0.11	-0.03	-0.27	-0.28	-0.28	-0.12	-0.15	-0.13	-0.02	-0.18	-0.25	-0.22	-0.25	-0.1	-0.3	-0.31	-0.25	0.02	0	-0.47	-0.21	0.05	-0.18	-0.41	-0.16	-0.25	-0.03	-0.32	0.01	-0.04
ARSK	0.02	-0.02	0.04	-0.12	0.05	-0.1	0.09	-0.09	-0.08	-0.06	-0.19	-0.04	-0.09	-0.11	-0.01	-0.16	-0.03	-0.13	-0.01	-0.21	0.14	-0.07	-0.06	-0.13	-0.04	-0.05	0	0.03	0.02	-0.09	-0.03	-0.05	-0.2	-0.12	-0.1	-0.07	-0.06	0.03	-0.29	-0.03	0.01	-0.02	-0.08	-0.03	-0.11	-0.01	-0.11	-0.03	0
ART1	0.11	0.05	0	0.07	-0.04	0.1	-0.07	0.08	-0.02	0.01	0	0	0.08	0.07	0.03	0.06	-0.01	0.05	0.01	-0.06	-0.05	0.04	0.06	0.09	0.1	-0.06	-0.01	-0.04	0.08	0.09	0.06	0.07	-0.04	0.06	0.07	0.03	0.03	0.06	0.07	0.1	0.01	0.06	0.08	0.02	0.05	0.07	0.07	0.05	0.02
ART3	-0.03	0.03	-0.01	0.09	-0.06	0.05	-0.06	0.03	0.07	0	0.03	-0.06	0.07	0.26	0.05	0.15	-0.01	0.2	0.05	0.03	0.01	0.02	0.03	0.05	0.05	-0.05	-0.01	0.03	0.07	0.07	0.05	0.08	-0.14	0.09	0.1	0.13	-0.06	0.04	0.13	0.13	0.05	0.09	0.15	0.01	0.02	0.06	0.08	0.04	0.08
ART4	-0.08	0	0.03	0.06	-0.04	0.06	-0.01	0.13	0.02	-0.03	0.07	-0.02	0.01	0.16	0.04	0.11	-0.02	0.17	0.05	-0.04	0.02	0.04	0.05	0.1	0.06	-0.02	0.02	-0.02	0.07	0.07	0.05	0.08	0.23	0.05	0.1	0	0.01	-0.04	0.1	-0.01	-0.05	0.04	0.08	0.09	0.04	0.05	0.05	-0.01	0.02
ART5	-0.06	0.01	0.06	0.02	-0.04	0.07	-0.03	0.01	-0.01	-0.02	-0.02	-0.05	0.05	0.04	0.05	0.05	-0.07	-0.02	0.04	-0.04	0.05	0.01	0.03	0.12	0.07	-0.03	0.02	-0.01	0.11	0.09	0.09	0.06	-0.03	0.02	0.14	0.01	0.05	0.04	0	0.04	0.05	0.02	0.08	0.04	0.06	0.02	0.05	-0.02	-0.03
ARTN	0.01	0.01	-0.17	-0.02	0.02	-0.02	-0.03	0.02	-0.07	0.01	0.17	0	-0.03	0.05	-0.02	-0.11	-0.02	0.07	-0.11	0.13	-0.04	-0.13	-0.07	-0.06	-0.01	-0.08	-0.16	-0.04	0	-0.05	-0.04	-0.01	-0.01	-0.04	0	-0.16	-0.02	0.01	-0.02	-0.07	-0.02	0	-0.06	-0.02	-0.05	0.09	-0.13	0	0.05
ARV1	0	0.04	-0.01	0.12	-0.05	0.06	-0.11	0.11	0.04	-0.01	0.01	0.04	0.06	0.19	0.11	0.11	0.04	0.07	0.06	0.06	0.03	0.07	0.08	0.1	0.05	0.06	0.01	-0.05	0.1	-0.02	0.09	0.1	-0.12	0.05	0.15	0.07	0.04	0.06	0.15	0.03	0.05	0.1	0.18	0.11	0.01	-0.05	0.06	0.07	-0.02
ARVCF	0.06	0.02	-0.06	0.04	0.03	0.05	0.06	-0.03	0.02	0.02	0.19	-0.02	0.03	0.05	0.01	0.04	-0.1	0.07	-0.04	0.14	-0.13	0.03	-0.04	0.07	0.02	-0.09	-0.13	0	-0.01	-0.02	0.05	-0.02	0.17	0.05	0.01	-0.01	-0.03	-0.03	0.09	-0.05	0.01	0	0.01	0.03	-0.02	0.03	0.01	0.15	0.01
ARX	-0.1	0.08	-0.08	0.02	0.03	0.05	-0.02	0.12	0.07	-0.01	0.07	0.06	0.01	0.1	-0.06	0.04	0.03	0.07	-0.03	0.12	-0.11	0.07	-0.03	0	0.06	0.07	-0.13	-0.01	0	-0.05	0.05	0.05	-0.02	0	0.03	0.04	0.01	-0.03	0.17	0.03	-0.03	-0.01	0.05	0.06	0.03	-0.04	0.07	0.1	-0.01
ASAH1	-0.01	-0.01	-0.18	-0.19	-0.07	-0.06	0.02	-0.07	-0.02	-0.07	0.07	-0.04	-0.17	-0.08	-0.06	-0.03	-0.01	-0.17	-0.11	0.15	-0.05	-0.09	-0.15	-0.06	-0.01	-0.04	-0.08	-0.04	-0.03	-0.19	-0.06	-0.07	-0.07	-0.08	-0.12	-0.02	0.07	0.05	-0.05	-0.14	0	-0.07	-0.19	-0.04	-0.07	0.06	-0.09	-0.06	-0.12
ASAP1	0.01	-0.12	0.01	-0.18	0.02	-0.1	0.01	-0.14	-0.08	0.05	-0.2	0.02	-0.17	-0.25	-0.04	-0.23	-0.09	-0.23	-0.03	-0.21	0.09	-0.12	-0.07	-0.16	-0.08	-0.08	0.03	0.02	-0.1	-0.09	-0.11	-0.17	-0.11	-0.17	-0.17	-0.14	-0.07	-0.01	-0.34	-0.09	0.04	-0.07	-0.23	-0.09	-0.14	-0.06	-0.16	-0.13	-0.06
ASAP1-IT1	-0.09	-0.09	0	-0.13	0.06	-0.09	0.03	-0.15	-0.04	0.03	-0.1	0.05	-0.17	-0.18	-0.05	-0.17	-0.05	-0.13	-0.06	-0.16	0.02	-0.11	-0.11	-0.19	-0.03	-0.1	0	0.07	-0.07	-0.06	-0.06	-0.18	-0.08	-0.17	-0.16	-0.09	-0.1	-0.05	-0.21	-0.04	0.05	0.02	-0.19	-0.11	-0.14	-0.06	-0.1	-0.16	-0.05
ASAP2	-0.13	-0.16	-0.22	-0.33	0.04	-0.21	0.16	-0.23	-0.25	-0.02	0	-0.05	-0.34	-0.41	-0.21	-0.39	-0.07	-0.38	-0.28	0.06	-0.13	-0.26	-0.38	-0.26	-0.17	-0.23	-0.22	-0.1	-0.23	-0.33	-0.26	-0.33	-0.11	-0.33	-0.37	-0.21	0.03	-0.05	-0.43	-0.23	-0.01	-0.22	-0.46	-0.2	-0.25	-0.03	-0.31	-0.01	-0.06
ASAP3	-0.05	-0.07	-0.02	-0.18	0.08	-0.06	0.06	-0.12	-0.1	0.01	-0.1	0.04	-0.08	-0.14	0.01	-0.17	-0.11	-0.14	-0.02	-0.11	0.13	-0.1	-0.03	-0.15	-0.12	0	0.03	0.08	-0.09	-0.1	-0.06	-0.06	-0.16	-0.11	-0.13	-0.11	0.09	-0.03	-0.24	-0.06	0.03	0.01	-0.17	-0.03	-0.05	-0.09	-0.14	-0.09	-0.04
ASB1	0.03	0.02	0.11	0.08	0.13	0.09	0.05	0.1	0.08	0.04	-0.15	-0.02	0.11	0.06	0.03	0.1	0.02	0.09	0.13	-0.17	0.21	0.13	0.17	0.04	0	0.1	0.16	0.01	0.04	0.11	0.04	0.11	0.07	0.12	0.09	0.07	-0.11	-0.04	0.1	0.09	-0.02	0.02	0.09	0.04	0.02	-0.1	0.12	-0.09	0.05
ASB10	0.11	0.02	0.04	0.05	-0.07	0.08	-0.06	0.02	0	0.01	0.07	-0.04	0.04	0.1	-0.01	0.09	-0.01	0.17	0.02	-0.08	-0.03	0.01	-0.01	0.04	0.09	-0.06	-0.04	0.07	0.07	0.11	0.11	0.04	0	0.04	0.05	-0.02	-0.03	0.03	0.12	0.07	0.06	0.09	0.07	-0.02	0.04	0.09	0.08	0.15	0.03
ASB11	0.08	-0.01	0.03	0.07	-0.03	0.04	-0.08	0.1	0.02	0.04	-0.02	-0.04	0.01	0.12	0.05	0.08	-0.02	0.13	0.02	-0.04	0	0.04	0.04	0.02	0.05	-0.02	0.02	-0.04	0.06	0.05	0.09	0.06	0.14	0.05	0.09	0.07	-0.06	0.08	0.12	0.08	0.02	0.05	0.12	0.07	0	-0.01	0.06	0.07	0.04
ASB12	0.07	0.04	0.08	0.14	-0.02	0.09	-0.08	0.09	0.08	0.05	0.07	0.01	0.18	0.19	-0.02	0.18	0.04	0.14	0.11	0.05	-0.01	0.07	0.12	0.13	0.1	0.1	0	0	0.13	0.17	0.12	0.11	-0.14	0.21	0.13	0.1	-0.06	0.02	0.18	0.15	-0.01	0.05	0.2	0.04	0.05	0.08	0.13	0.03	0.02
ASB13	0	0.02	-0.09	0.06	0	0.03	-0.02	-0.03	0.03	0.03	0.08	0.02	0.1	0.09	-0.01	0.06	0.01	0.06	-0.01	0.11	-0.09	0.05	0.02	0.09	0.02	-0.01	-0.04	-0.08	0.03	0.05	0.06	0.04	0.18	0.04	0.02	0.06	-0.05	0.04	0.15	0.02	0.09	0.02	0.12	0.01	0.05	-0.01	0.02	-0.02	-0.05
ASB14	0	0.08	0.11	0.12	0.02	0.14	-0.02	0.16	0.1	0.06	0.01	0.04	0.12	0.24	0	0.21	0.1	0.21	0.13	-0.12	0.09	0.17	0.13	0.07	0.09	0.06	0.05	0.06	0.05	0.16	0.11	0.19	-0.01	0.15	0.11	0.19	-0.11	-0.03	0.26	0.14	-0.05	0.13	0.2	0.05	0.07	0.05	0.21	-0.01	0.02
ASB15	0.06	0.05	0.14	0.14	0.01	0.1	-0.11	0.21	0.13	0.06	0.01	0	0.18	0.13	0.04	0.18	0.1	0.19	0.2	-0.09	0.11	0.23	0.2	0.14	0.06	0.16	0.18	0.07	0.13	0.19	0.16	0.13	0.03	0.17	0.14	0.13	-0.01	0.01	0.15	0.18	0.01	0.08	0.22	0.04	0.09	-0.01	0.24	0.1	0.12
ASB16	-0.01	0.01	0.05	0.05	-0.06	0.07	0.04	0.02	-0.01	-0.03	-0.02	-0.06	0.04	0.09	0.03	0.03	-0.04	0.11	0.03	-0.1	0.01	-0.03	0.06	0.03	0.08	-0.03	0	0.01	0.06	0.06	0.1	0.04	0.05	0.02	0.07	0.02	-0.05	0.11	0.03	0.06	0.05	0.1	0.08	0.02	0	-0.01	0.02	0.06	-0.01
ASB16-AS1	0.06	0.19	0.16	0.22	-0.06	0.1	-0.18	0.24	0.21	0.05	0.04	0.01	0.22	0.19	0.09	0.29	0.13	0.17	0.2	0	0.05	0.27	0.22	0.2	0.11	0.12	0.05	0.08	0.07	0.17	0.14	0.18	0.2	0.27	0.2	0.19	-0.01	-0.06	0.33	0.16	-0.03	0.09	0.27	0.13	0.17	-0.01	0.23	0.04	0.06
ASB17	-0.02	0.02	0.09	0.1	-0.06	0.07	-0.01	0.09	0	-0.03	-0.02	0.02	0.1	0.1	0	0.12	-0.07	0.14	0.12	-0.11	0.1	0.09	0.09	0.09	0.05	-0.04	0.06	0.03	0.06	0.14	0.1	0.04	0.1	0.13	0.04	0.08	-0.03	-0.06	0.11	0.06	-0.02	0.06	0.14	0.04	0.05	0	0.1	-0.08	0.04
ASB2	0.02	0.07	0.09	0.13	-0.11	0.15	-0.15	0.09	0.11	0.01	0.07	-0.06	0.1	0.28	0.13	0.17	0.05	0.22	0.06	-0.07	0.07	0.08	0.01	0.05	0.08	-0.01	0	0.08	0.09	0.18	0.12	0.06	-0.05	0.07	0.14	0.05	-0.09	0.12	0.15	0.09	0.04	0.09	0.15	0.01	0.06	0.08	0.09	0.1	0.11
ASB3	-0.04	0.06	0.25	0.19	0.07	0.11	-0.06	0.09	0.06	0.03	-0.11	0.05	0.2	0.16	0.08	0.18	0.11	0.11	0.19	-0.23	0.18	0.11	0.2	0.07	0.04	0.11	0.21	0.06	0.01	0.19	0.09	0.17	-0.03	0.17	0.16	0.13	-0.1	0	0.18	0.16	-0.04	0.12	0.26	0.13	0.09	-0.02	0.19	-0.04	0.13
ASB4	0.05	0	-0.07	-0.02	0.02	0.03	-0.03	0.01	-0.05	0.02	0.06	0	0	0.07	-0.05	0.02	0.01	0	-0.06	0.03	-0.13	0.02	-0.08	0.04	0	-0.05	-0.06	-0.04	0.02	-0.02	0.03	-0.02	-0.04	0.02	0.05	0.01	-0.07	0.09	0.12	-0.02	0.01	0.02	-0.01	-0.01	0.06	0.03	0.06	-0.02	-0.02
ASB5	-0.04	-0.06	0.08	-0.05	0.06	-0.07	0.01	0.01	-0.01	-0.01	-0.13	-0.01	-0.05	-0.12	-0.01	-0.05	0.05	-0.04	0.05	-0.1	-0.01	-0.05	0.01	-0.04	0.05	-0.09	0.08	0.07	0.02	-0.01	0.01	-0.01	-0.35	-0.06	0	-0.06	-0.05	0.03	-0.1	0.06	-0.03	0	-0.02	-0.01	-0.07	-0.02	-0.02	0.01	0
ASB6	0.07	-0.04	-0.04	-0.05	-0.01	-0.06	-0.1	-0.11	-0.12	0.02	-0.12	-0.04	-0.02	-0.01	-0.01	-0.05	0.01	0	0.05	-0.11	0.03	-0.05	-0.02	-0.05	-0.08	-0.04	0.01	0.08	-0.03	-0.01	0.01	-0.02	-0.01	-0.01	-0.05	-0.04	0.01	0.02	-0.05	0.02	-0.01	-0.01	-0.02	-0.05	-0.04	0.01	0.03	0.11	0.02
ASB7	-0.02	-0.03	-0.08	0.1	0.05	0.05	0.08	-0.03	-0.08	-0.1	0.06	-0.04	0.06	0.07	0.01	0.11	-0.06	0.06	0	0.04	0.04	0.01	0.02	0.12	0.04	0.02	0.03	-0.05	0.06	0.14	0.06	0.02	-0.08	0.07	0.08	0.05	0.03	-0.06	0.11	0	-0.09	0.05	0.13	-0.01	0.04	0.06	0.05	0	0.1
ASB8	0.02	0.14	0.28	0.15	-0.02	0.2	-0.25	0.23	0.21	0.1	-0.02	0.04	0.21	0.16	0.15	0.27	0.03	0.16	0.18	-0.09	0.04	0.34	0.28	0.18	0.17	0.33	0.19	0.07	0.05	0.16	0.18	0.18	0.03	0.2	0.18	0.18	0.04	-0.01	0.29	0.2	-0.05	0.15	0.24	0.14	0.19	-0.04	0.28	0.04	-0.03
ASB9	-0.11	-0.16	-0.16	-0.19	-0.02	-0.1	0.23	-0.19	-0.11	-0.06	-0.03	-0.11	-0.25	-0.13	-0.17	-0.21	0	-0.22	-0.23	0.17	-0.08	-0.25	-0.27	-0.22	-0.16	-0.18	-0.19	-0.1	-0.01	-0.2	-0.13	-0.23	-0.02	-0.23	-0.18	-0.09	0.04	0.05	-0.17	-0.23	0.06	-0.15	-0.23	-0.15	-0.16	0.03	-0.23	-0.08	-0.12
ASCC1	-0.03	0.01	0	0.07	-0.05	0.01	0.01	0.01	-0.04	-0.05	0.1	-0.04	0.08	0	0.04	0	-0.02	-0.01	0.01	-0.05	0.11	0.01	0	0.08	0.06	0.06	0	0	0.04	0.15	0.04	0.02	0.2	0.02	0.09	-0.01	0.08	-0.09	-0.06	0	0	-0.02	0.08	0.07	0.03	0.04	-0.07	-0.06	0.04
ASCC2	0.02	0.01	0.02	0.02	-0.04	0.05	-0.09	-0.01	-0.01	0.01	0.05	-0.06	0.06	0.09	0.06	0.1	-0.06	0.04	0.07	-0.04	0.05	0.02	0.07	0.01	0.01	0.02	-0.03	0.05	0.07	0.1	0.03	0	-0.02	0.08	0.05	-0.01	0.01	0.06	0.03	0	-0.04	0.06	0.03	-0.04	0.01	0.07	-0.01	0.1	0.01
ASCC3	-0.02	0.05	0.04	0.18	-0.02	0.11	0.02	0.02	0.04	0.04	0.08	0.05	0.1	0.13	0.07	0.1	0.01	0.21	0.12	-0.03	0.13	0.07	0.08	0.04	0.1	0.01	0.07	0.06	0.07	0.1	0.13	0.1	0.05	0.11	0.15	0.03	0.02	-0.04	0.02	0.1	0.06	0.09	0.14	0.08	0.03	0.01	0.04	0.04	0.17
ASCL1	0.01	0.08	0.07	0.16	0.04	0.06	0.03	0.14	0.06	0.04	0.09	-0.03	0.11	0.24	0.03	0.22	0.06	0.19	0.07	0.09	-0.13	0.16	0.1	0.14	0.05	0.06	0.03	0.01	0.06	0.09	0.11	0.15	0.25	0.13	0.16	0.13	-0.05	0.02	0.37	0.1	-0.03	0.05	0.19	0.12	0.1	-0.03	0.18	0.02	0.03
ASCL2	-0.07	0.06	-0.08	0.04	0.01	0.11	-0.01	-0.03	0	0	0.23	0.06	0.07	0.05	0.02	0.07	-0.04	0.05	-0.06	0.19	-0.16	0.02	-0.05	0.07	-0.05	0.02	-0.04	-0.01	-0.05	-0.01	-0.01	-0.02	0.2	0.03	0.08	0.03	0.09	0	0.09	0.02	0	0.02	0.03	-0.01	0.07	-0.04	0.05	-0.03	0.04
ASCL3	0.08	0.08	0	0.06	-0.04	0.07	-0.07	0.11	-0.02	0.03	0.02	-0.04	0.04	0.17	-0.01	0.09	0.03	0.11	0.04	-0.03	-0.01	0.02	0.05	0.03	0.07	0.04	0.01	0.01	0.08	0.1	0.11	0.08	0.03	0.07	0.07	0.05	-0.02	0.09	0.11	0.06	-0.05	0.11	0.06	0.02	0.06	0.03	0.09	0.08	0.02
ASF1A	0.05	0.14	0.12	0.29	0.02	0.14	-0.03	0.18	0.15	0.05	-0.06	0.01	0.28	0.24	0.14	0.27	0.07	0.27	0.25	-0.09	0.27	0.14	0.31	0.16	0.11	0.21	0.17	0.04	0.14	0.25	0.23	0.26	0.14	0.27	0.3	0.09	0.08	0.04	0.3	0.19	-0.01	0.15	0.41	0.17	0.14	0.02	0.17	-0.04	0
ASF1B	0.02	0.1	0.12	0.21	-0.04	0.12	-0.2	0.16	0.09	0.01	-0.02	0	0.15	0.16	0.05	0.16	0.1	0.21	0.11	-0.08	0.03	0.16	0.16	0.13	0.04	0.05	0.03	0.07	0.14	0.21	0.13	0.11	0.11	0.2	0.15	0.13	-0.04	-0.11	0.19	0.13	0	0.1	0.22	0.06	0.09	0.07	0.2	-0.01	-0.02
ASGR1	0.15	0.05	0.08	0.04	0.08	0.06	0.07	-0.05	0	0	-0.02	0.03	0.06	0.06	-0.06	0.08	-0.03	0.08	0.06	-0.01	-0.04	0.08	0.09	0.08	-0.03	0	0.07	0	0.06	0.06	0.02	0.06	0.03	0.09	0.08	0.06	-0.02	0.06	0.11	0.05	0.01	0.02	0.12	0.02	0.04	0.03	0.09	0.08	0.03
ASGR2	-0.02	0.1	0.08	0.12	-0.06	0.11	-0.05	0.12	0.07	0	0.09	0.03	0.08	0.18	0.07	0.13	-0.02	0.08	0.01	0.07	-0.08	0.13	0.12	0.13	0.12	-0.01	0.02	-0.01	0.13	0.09	0.05	0.1	0.13	0.1	0.14	0.08	-0.01	0.06	0.19	0.07	-0.03	0.17	0.15	0.07	0.09	0.03	0.09	-0.1	-0.04
ASH1L	0.01	0.05	0	0.09	0.06	0.05	0.11	0.07	-0.01	0.09	0.13	0.06	0.09	-0.02	0.04	0.07	0	-0.04	0.02	0.17	-0.15	0.1	0.06	0.1	0.06	0.03	0.04	0	-0.05	-0.02	0.02	0.04	0	0.07	0.07	0.04	-0.04	0.03	0.08	0.08	0.01	0.13	0.08	0.07	0.06	-0.09	0.05	0.09	0.02
ASH1L-AS1	0.01	0.1	0.09	0.21	0	0.16	-0.13	0.17	0.09	0.06	0.15	0.04	0.22	0.22	0.06	0.22	0	0.25	0.07	0.08	-0.04	0.15	0.11	0.16	0.14	0.01	0.01	-0.02	0.05	0.15	0.09	0.14	0.27	0.18	0.19	0.11	-0.08	0.05	0.31	0.12	0.02	0.14	0.27	0.12	0.14	-0.09	0.16	0.15	0.09
ASH2L	0.09	0.11	0.13	0.21	-0.03	0.18	-0.15	0.13	0.2	0	-0.11	-0.01	0.2	0.26	0.13	0.27	0.09	0.22	0.26	-0.11	0.1	0.2	0.33	0.13	0.07	0.26	0.21	0.09	0.14	0.22	0.23	0.21	0.21	0.25	0.16	0.2	-0.09	-0.01	0.24	0.23	-0.02	0.14	0.28	0.11	0.12	0.05	0.29	-0.04	0.07
ASIC1	0.06	-0.01	-0.01	0.11	-0.05	0	-0.11	0	0.03	0.05	0.02	0.06	0.09	0.11	0.02	0.04	-0.02	0.09	0.08	0.05	-0.01	0.06	0.08	0.18	0.02	0.01	0.06	-0.05	0.09	0.05	0.03	0.03	0.24	0.12	0.06	0.05	-0.05	-0.01	0.11	0.02	0.01	0.05	0.16	0.01	0.07	-0.05	0.05	-0.03	0.05
ASIC2	0.07	0	0.02	0.07	0	0.01	-0.07	0.03	0.08	0.01	0.02	-0.03	0.02	0.13	0	0.03	-0.02	0.08	0.03	0.03	-0.11	-0.02	0.04	-0.01	0	0.03	0.02	0	0	0.04	0.1	0.06	-0.1	0.01	0.04	0.01	-0.08	0.13	0.12	0.05	-0.01	0.08	0.09	-0.01	0.03	-0.03	0.08	0.1	0.02
ASIC3	0.12	0.1	0.07	0.05	-0.01	0.03	-0.06	0.1	0.08	0.05	0.02	0.03	0.09	0.12	0.04	0.08	0.01	0.06	0.04	0.02	0	0.12	0.07	0.09	0.03	0.09	-0.02	0.02	0.05	0.02	0.13	0.01	0.06	0.09	0.12	0.04	0	0.01	0.16	0.06	0	0.02	0.09	0.07	0.07	-0.01	0.01	0.1	0.01
ASIC4	0.03	0.05	-0.02	0.09	-0.02	0.05	-0.01	-0.03	0.05	-0.02	0.09	0.01	0.05	0.1	0.02	0.12	-0.05	0.1	-0.05	0.02	-0.06	-0.08	0.01	0	0.06	-0.05	-0.05	-0.07	0.03	0.03	0.08	0.05	0.23	-0.01	0.05	-0.03	0.01	0.13	0.14	0.01	0.04	0.02	0.09	0.02	0.02	0.03	0.01	0.14	0.02
ASIC5	0.09	0.1	0.06	0.1	-0.06	0.11	-0.14	0.09	0.05	0.03	0.08	-0.01	0.09	0.17	0.05	0.12	0.03	0.14	0.06	-0.02	-0.04	0.08	0.06	0.04	0.09	0.03	-0.03	0.09	0.08	0.06	0.1	0.11	0	0.07	0.1	0.05	-0.03	0.07	0.14	0.08	0.04	0.13	0.12	0.04	0.05	0.05	0.11	0.08	0.05
ASIP	-0.02	-0.07	-0.05	-0.03	-0.07	0.02	-0.21	-0.05	-0.04	-0.03	0.02	0.03	-0.05	0.03	-0.05	-0.02	-0.07	0.07	-0.14	-0.09	0	-0.11	-0.13	-0.08	-0.06	-0.1	-0.06	-0.01	-0.01	-0.03	-0.04	-0.03	-0.03	-0.14	-0.02	-0.06	-0.01	-0.04	-0.02	-0.02	0.04	0	-0.05	-0.07	-0.03	-0.03	-0.06	-0.09	0
ASL	-0.06	-0.13	-0.13	-0.24	-0.11	-0.12	-0.08	-0.14	-0.15	-0.08	-0.04	-0.02	-0.22	-0.26	-0.11	-0.21	-0.14	-0.18	-0.16	0.06	-0.02	-0.18	-0.22	-0.11	-0.05	-0.19	-0.12	-0.02	-0.09	-0.14	-0.09	-0.21	-0.07	-0.18	-0.22	-0.15	0.13	0.01	-0.25	-0.19	0.06	-0.11	-0.29	-0.18	-0.17	0	-0.15	0.01	-0.13
ASMT	0.03	0.11	0.08	0.18	-0.01	0.12	-0.15	0.07	0.07	0.02	0.08	0.03	0.14	0.18	0.11	0.16	0	0.23	0.04	-0.09	0.02	0.09	0.07	0.12	0.1	0.02	0	0.08	0.08	0.15	0.1	0.09	0.08	0.09	0.17	0.07	-0.04	0.04	0.2	0.15	0	0.13	0.19	0.12	0.12	0.02	0.15	0.11	0.07
ASMTL	-0.04	0.04	0.19	0.14	-0.01	0.11	-0.17	0.07	0.09	0.01	-0.02	0.02	0.19	0.16	0.08	0.14	0.04	0.22	0.18	-0.17	0.16	0.18	0.2	0.15	0.04	0.12	0.15	0.09	0.09	0.22	0.12	0.14	0.14	0.15	0.18	0.11	-0.01	-0.03	0.14	0.11	0	0.09	0.21	0.09	0.1	-0.01	0.12	-0.07	0.07
ASMTL-AS1	0.09	0.07	0.06	0.11	-0.1	0.08	-0.21	0.1	0.05	0.03	0.03	0.02	0.07	0.18	0.05	0.09	0.04	0.16	0.07	-0.11	0.02	0.03	0.07	0.05	0.09	0.04	0.03	0.05	0.09	0.1	0.12	0.12	0.03	0.08	0.12	0.03	-0.03	-0.04	0.08	0.13	-0.01	0.11	0.1	0.05	0.08	0.05	0.1	0.05	0.05
ASNA1	-0.03	0	-0.02	-0.07	-0.09	-0.03	-0.1	-0.1	-0.12	-0.01	-0.2	-0.06	-0.11	-0.07	0.02	-0.15	-0.03	-0.07	-0.02	-0.09	0.05	-0.07	-0.04	-0.1	-0.12	-0.05	-0.04	0.01	0.01	-0.14	0.01	-0.05	0.02	-0.08	-0.06	-0.07	0.07	0.02	-0.15	-0.06	0.04	-0.06	-0.09	-0.03	-0.11	-0.01	-0.06	0.07	-0.12
ASNS	-0.12	0.07	0.05	0.13	-0.01	0.1	0.05	0.08	0.07	-0.06	0.05	-0.03	0.15	0.2	0.06	0.12	0	0.17	0.08	0.06	-0.01	0.09	0.09	0.14	0.1	0.07	0.01	-0.06	0.09	0.08	0.11	0.17	-0.06	0.08	0.15	0.11	0	0.01	0.2	0.05	0	0.03	0.21	0.09	0.12	-0.08	0.09	-0.12	0.05
ASNSD1	0.08	0.07	0.13	0.19	0	0.15	-0.07	0.09	0.12	0.06	-0.15	0.01	0.17	0.11	0.08	0.16	0.07	0.15	0.17	-0.1	0.15	0.13	0.23	0.09	0.1	0.15	0.22	0.03	0.12	0.13	0.18	0.16	-0.04	0.15	0.14	0.11	-0.01	-0.03	0.14	0.17	0.05	0.12	0.28	0.11	0.11	-0.03	0.19	0.03	0.05
ASPA	-0.1	0.02	0.02	0.02	-0.16	0.08	-0.09	0.02	0.07	-0.03	-0.06	0.01	0.03	0.02	0.02	0.07	-0.05	0.02	0.04	-0.11	0.04	0.05	0.03	0.02	0.02	-0.02	0.05	0.01	0	0.03	-0.01	0.01	-0.1	0.06	0	0.12	-0.03	-0.06	0.04	0.04	-0.01	0.01	0.07	-0.03	0.01	-0.05	0.1	-0.04	0.01
ASPDH	-0.02	-0.06	-0.01	-0.08	-0.04	0.04	-0.04	-0.07	-0.09	0	0.07	0.01	-0.04	-0.01	-0.1	-0.03	-0.06	-0.08	-0.09	-0.03	-0.08	-0.07	-0.14	-0.05	0	-0.12	-0.09	-0.04	-0.08	-0.08	0.01	-0.05	-0.03	-0.1	-0.05	-0.05	-0.07	0.03	0.01	-0.03	0.03	-0.06	-0.06	-0.06	0.01	-0.02	-0.01	0.11	-0.08
ASPG	0.17	-0.02	-0.02	-0.04	0.01	0.01	0.08	-0.06	-0.09	0.01	-0.01	0	-0.03	-0.02	-0.03	-0.05	-0.05	0.03	-0.04	-0.12	-0.06	-0.09	-0.06	-0.04	-0.01	-0.1	-0.04	0.02	0.04	0.01	0.03	-0.01	-0.08	-0.1	-0.03	-0.07	-0.02	0.09	-0.11	0.03	0.09	0.01	-0.03	-0.07	-0.05	0.06	-0.03	0.09	-0.02
ASPH	-0.04	-0.19	-0.26	-0.31	0.05	-0.23	0.28	-0.25	-0.26	-0.04	-0.06	-0.03	-0.38	-0.46	-0.19	-0.42	-0.08	-0.39	-0.31	0.01	-0.08	-0.41	-0.37	-0.31	-0.11	-0.31	-0.2	-0.12	-0.14	-0.31	-0.24	-0.32	-0.05	-0.38	-0.35	-0.29	0.09	0.02	-0.49	-0.27	0.07	-0.17	-0.48	-0.2	-0.26	0	-0.43	-0.07	-0.08
ASPHD1	0.02	-0.09	-0.08	-0.19	0	-0.17	0.13	-0.16	-0.12	-0.02	-0.17	-0.02	-0.21	-0.26	-0.1	-0.28	-0.09	-0.28	-0.12	0.04	-0.09	-0.2	-0.15	-0.12	-0.1	-0.18	-0.11	-0.07	-0.13	-0.21	-0.14	-0.18	-0.03	-0.21	-0.21	-0.14	-0.06	0.07	-0.26	-0.14	0.09	-0.13	-0.23	-0.09	-0.11	-0.09	-0.16	0.12	-0.13
ASPHD2	0.07	0.15	0.15	0.18	-0.08	0.1	-0.2	0.13	0.16	0.02	-0.07	-0.01	0.2	0.22	0.14	0.22	0.09	0.16	0.26	-0.13	0.06	0.21	0.19	0.17	0.01	0.13	0.15	0.13	0.07	0.24	0.12	0.16	-0.06	0.24	0.17	0.13	-0.18	0.03	0.2	0.24	-0.06	0.12	0.26	0.05	0.13	-0.01	0.19	0.03	0.14
ASPM	-0.03	0.05	0.06	0.2	0.09	0.02	0.05	0.08	0.02	0.05	-0.04	-0.02	0.07	0.02	0.05	0.03	0.06	0.1	0.06	-0.06	0.01	0.03	0.09	-0.01	0.07	0	0.02	0.04	0.12	0.11	0.06	0.07	0.02	0.06	0.11	0.05	-0.11	0.02	0.12	0.13	0.02	0.12	0.18	0.08	-0.01	-0.01	0.01	-0.01	0.04
ASPN	0.02	0.06	0.11	0.17	0	0.09	-0.09	0.16	0.14	0.04	-0.03	0.01	0.11	0.16	0.08	0.19	0.12	0.21	0.19	-0.14	-0.02	0.18	0.19	0.1	0.13	0.1	0.18	0.06	0.09	0.16	0.16	0.16	0.02	0.13	0.14	0.18	-0.04	-0.11	0.22	0.15	-0.09	0.17	0.2	0.02	0.07	-0.01	0.26	-0.03	0.01
ASPRV1	0.17	0.13	0.05	0.17	0.09	0.13	-0.1	0.18	0.14	0	0.07	0.04	0.19	0.23	0.04	0.2	0.06	0.19	0.1	0.05	-0.04	0.13	0.17	0.11	0.03	0.16	0.08	-0.03	0.13	0.18	0.08	0.16	-0.04	0.19	0.16	0.13	-0.03	0.12	0.28	0.12	-0.06	0.14	0.22	0.07	0.16	0.06	0.2	0.07	0.02
ASPSCR1	0.04	0.06	0.01	0.03	-0.06	0.05	0.01	-0.01	0.05	0.04	0.01	-0.01	0.07	-0.01	0.06	0.06	-0.06	0.05	0.03	0.05	-0.01	0.04	0.08	0.05	0.07	0.08	0.04	-0.01	-0.04	-0.02	0	-0.02	0.02	0.1	-0.01	0.04	-0.05	0.02	0.12	-0.03	0.04	0.01	0.03	0.01	0.07	-0.05	0.03	0.02	-0.14
ASRGL1	0.08	0.09	0.04	0.06	-0.04	0.04	-0.01	0.03	0.11	0.04	0	0.09	0.07	0.07	0.01	0.12	0	-0.04	0.03	0.17	-0.17	0.11	0.09	0.13	0.06	0.1	0.02	-0.07	0.15	-0.01	-0.04	0.1	-0.04	0.09	0.1	0.12	-0.04	0.01	0.17	-0.02	0.02	0.04	0.19	0.17	0.14	-0.05	0.12	-0.02	-0.1
ASS1	0.03	-0.03	-0.15	0.03	0.08	-0.11	0.16	-0.08	-0.02	0.02	0.18	0.09	0.04	-0.13	0.06	-0.08	-0.12	-0.08	-0.09	0.27	-0.17	-0.04	-0.06	0.09	-0.03	-0.01	-0.09	-0.03	-0.03	-0.03	-0.04	-0.05	-0.02	0.04	0.03	-0.1	0.06	-0.06	-0.1	-0.09	0	-0.03	-0.06	0.01	0.01	-0.02	-0.1	0.02	0.02
ASTE1	-0.04	0.05	0.05	0.1	0.04	0.03	-0.12	0.02	-0.01	-0.01	0.05	0.02	0.12	0.13	0.07	0.09	0.05	0.14	0.08	-0.03	-0.01	0.01	0.1	0.07	0.07	0.05	0.04	0.09	0.08	0.12	0.09	0.14	-0.31	0.12	0.1	0.08	-0.06	-0.02	0.09	0.09	-0.01	0.12	0.18	0.02	-0.02	0.02	0.13	-0.06	0.05
ASTN1	0.04	0.07	0.14	0.15	0.01	0.11	-0.01	0.13	0.1	-0.01	0	0.02	0.14	0.2	0.05	0.18	0.03	0.33	0.11	-0.04	0.03	0.19	0.13	0.08	0.06	0.12	0.08	0.04	0.08	0.13	0.11	0.12	0.06	0.1	0.13	0.1	-0.08	-0.01	0.29	0.17	-0.01	0.1	0.2	0.08	0.09	-0.06	0.16	0.07	0.04
ASTN2	-0.05	0.07	0.09	-0.07	0	0.01	0.03	0.01	0.06	0.01	-0.12	-0.04	-0.03	0	-0.06	0.04	-0.01	0	0.03	0.06	-0.05	0.07	0.01	-0.02	-0.04	-0.04	0.06	0.02	0.03	-0.09	0.04	0	-0.03	-0.03	-0.04	0.04	0	0.06	0.07	0.05	0.02	-0.02	0.05	0.03	0.05	-0.16	0.1	0.03	-0.03
ASUN	-0.05	0.04	0.09	0.18	-0.04	0.1	-0.07	0.08	0.01	0	-0.02	-0.05	0.18	0.29	0.08	0.13	-0.01	0.22	0.08	-0.13	0.1	0.05	0.12	0.1	0.07	0.08	0.04	-0.02	0.19	0.2	0.15	0.11	0.21	0.14	0.17	0.05	0.01	0.02	0.23	0.08	0.06	0.12	0.3	0.07	0.11	0.04	0.06	-0.05	0.07
ASXL1	0.12	0.01	0.18	0.06	0.12	0.06	-0.04	0.06	0.07	0.02	-0.05	0.02	0.05	0.03	0.03	0.1	-0.02	0.08	0.1	-0.21	0.15	0.05	0.07	0.04	0.05	0.01	0.09	0.04	0.08	0.2	0.04	0.04	0.16	0.02	0.1	0.06	-0.08	-0.03	0.1	0.05	-0.02	0.04	0.09	0.06	0.09	0.02	0.09	-0.01	0.02
ASXL2	0.02	0.1	0.05	0.23	-0.04	0.13	-0.05	0.12	0.12	0.05	0.14	0	0.23	0.3	0.05	0.23	0.03	0.17	0.14	0.07	0.02	0.17	0.15	0.22	0.11	0.02	0.05	-0.04	0.13	0.23	0.13	0.12	0.26	0.24	0.18	0.18	0.01	0.07	0.3	0.1	-0.05	0.08	0.29	0.12	0.14	0.02	0.2	0.03	0.09
ASXL3	0.05	0.13	0.15	0.15	0.03	0.12	-0.11	0.21	0.19	0.06	-0.01	0.04	0.16	0.21	0.09	0.19	0.08	0.21	0.11	0	-0.04	0.13	0.17	0.11	0.11	0.12	0.07	-0.02	0.14	0.08	0.12	0.2	0.01	0.16	0.15	0.11	-0.1	-0.05	0.27	0.17	0	0.09	0.21	0.12	0.09	-0.03	0.2	0.01	0
ASZ1	0	0.03	0.11	0.02	-0.04	0.06	-0.14	0.05	0.05	0.03	0	-0.02	0.06	-0.02	-0.03	0.07	0.01	0.04	0.08	-0.05	0.02	0.1	0.05	0.04	0.02	0.05	0.08	0.09	-0.03	0.08	0.09	0.05	0.15	0.05	0.01	0.06	-0.02	-0.06	0.11	0.05	-0.04	-0.03	0.04	-0.06	0.07	0.02	0.11	0	0.06
ATAD1	-0.09	-0.04	-0.13	0.03	0.02	-0.06	0.1	-0.06	-0.06	-0.06	0.11	-0.03	0.03	0.02	-0.07	-0.02	-0.01	-0.02	-0.06	0.05	0	-0.01	-0.04	0.09	0.04	-0.04	-0.04	-0.12	0.03	0.02	-0.05	0.02	0.07	0.04	0.05	0.01	0	-0.01	-0.01	0.01	-0.07	-0.09	0.05	0.04	0.03	0.04	-0.04	-0.11	0.13
ATAD2	0.13	0.12	0.06	0.23	0.06	0.1	-0.01	0.11	0.1	0.06	0.11	0.07	0.15	0.07	0.12	0.17	0.08	0.12	0.09	0.07	-0.1	0.17	0.17	0.15	0.16	0.09	0.06	0	0.16	0.2	0.11	0.15	0.17	0.18	0.19	0.15	-0.04	-0.05	0.18	0.11	-0.02	0.15	0.23	0.11	0.13	0.03	0.17	0	0.02
ATAD2B	-0.04	0.14	0.15	0.29	0.07	0.2	-0.03	0.24	0.26	0.08	0.22	0.06	0.33	0.37	0.14	0.37	0.05	0.3	0.26	0.06	0.09	0.33	0.32	0.27	0.16	0.25	0.16	0.05	0.13	0.28	0.22	0.29	0.18	0.35	0.32	0.29	0	-0.03	0.47	0.18	-0.08	0.19	0.42	0.21	0.18	-0.03	0.28	-0.12	0.1
ATAD3A	0.06	0.05	0.02	0.13	-0.03	0.08	-0.07	0.01	-0.04	-0.02	-0.14	-0.03	0.07	0.21	0.03	0.11	-0.03	0.17	0	-0.05	-0.09	0	0.06	0.05	-0.01	0.03	0.03	0	0.14	0.15	0.09	0.04	0.24	0.04	0.11	0.03	0.03	0.03	0.15	0.06	0.01	0.09	0.16	0.06	0.07	0.05	0.1	-0.02	-0.06
ATAD3B	0.03	0.05	0.03	0.13	-0.06	0.1	-0.11	-0.01	-0.03	-0.04	-0.04	-0.04	0.1	0.24	0.03	0.11	-0.03	0.18	0.01	-0.03	-0.05	0.02	0.06	0.06	-0.01	0.02	0.03	0.03	0.18	0.14	0.08	0.04	0.14	0.09	0.14	0.06	-0.02	-0.01	0.13	0.06	0.02	0.12	0.17	0.06	0.1	0.06	0.09	0.02	0.01
ATAD3C	-0.05	0.08	0.1	0.09	0.05	0.14	-0.03	0.11	0.11	0	0.05	0.04	0.12	0.1	0	0.14	0.01	0.2	0.05	-0.08	0.02	0.12	0.05	0.11	0.01	0.07	0.05	0.06	0.03	0.14	0.03	0.1	0.1	0.1	0.08	0.05	-0.11	-0.11	0.2	0.08	-0.05	0.12	0.15	0.06	0.08	-0.01	0.14	-0.04	0.08
ATAD5	-0.01	0.08	0.13	0.33	0	0.13	-0.1	0.19	0.13	0.04	0.07	0	0.28	0.29	0.1	0.29	0.14	0.33	0.19	-0.05	0.04	0.21	0.23	0.24	0.16	0.16	0.07	0.04	0.26	0.28	0.23	0.2	0.11	0.29	0.25	0.23	-0.07	-0.09	0.42	0.2	-0.02	0.22	0.41	0.12	0.14	0.03	0.23	-0.07	0.07
ATAT1	0.04	0.08	0.09	0.14	0.03	0.09	0.08	0.18	0.14	0.05	-0.02	0.04	0.19	0.15	0.02	0.2	0.05	0.16	0.19	0.04	-0.02	0.09	0.2	0.14	0.11	0	0.09	-0.01	0.05	0.09	0.09	0.17	0	0.23	0.17	0.12	-0.16	-0.03	0.23	0.17	-0.01	0.02	0.22	0.09	0.08	0.06	0.21	-0.15	0.01
ATCAY	0	0.02	0.05	0.06	0.05	0.01	0.06	0.06	-0.01	0.05	0.11	0.02	0.09	0.05	0.02	0.04	-0.05	0.09	-0.04	0.13	-0.14	0.02	0.05	0.06	-0.02	0	-0.01	-0.01	-0.03	-0.02	0.02	0.04	-0.17	0.1	0.02	-0.05	-0.11	0.08	0.07	0.04	-0.01	0	0.05	0.03	0	-0.08	0.06	0.07	0.02
ATE1	-0.06	0.05	-0.09	0.1	0.04	0.11	0.06	-0.02	-0.01	0	0.03	-0.02	0.07	0.08	-0.07	0.06	0.01	0.15	0	0.02	0.04	0.02	0	0.07	0.06	0.11	-0.02	-0.1	0.14	0.08	0.02	0.03	0.12	0.04	0.1	0.04	0.07	0.02	0.16	0.05	0.01	0	0.16	0.04	0.07	0.09	0.05	0.07	0.03
ATF1	-0.01	0.06	0.02	0.19	0.06	0.06	0.01	0.08	0.07	0.04	-0.03	-0.01	0.16	0.09	0.05	0.05	0.05	0.1	0.06	-0.05	0.12	0.08	0.16	0.1	0.08	0.19	0.08	-0.08	0.07	0.14	0.07	0.07	0.07	0.1	0.15	0.07	0.05	0.03	0.11	0.09	-0.02	0.07	0.19	0.13	0.1	0.06	0.02	-0.05	0.07
ATF2	0.01	0.12	0.21	0.21	-0.02	0.16	-0.15	0.19	0.15	0.02	-0.06	0	0.19	0.17	0.13	0.19	0.04	0.14	0.2	-0.15	0.25	0.12	0.27	0.16	0.08	0.18	0.18	0.01	0.12	0.25	0.13	0.22	0.15	0.18	0.2	0.12	0	0.09	0.16	0.12	0.01	0.07	0.26	0.13	0.12	0	0.18	-0.08	0.08
ATF3	0.02	-0.05	-0.02	0.02	0.06	-0.03	0.06	-0.03	0.02	-0.08	0.12	0	0.02	-0.08	0.03	-0.02	-0.07	-0.08	-0.05	0.1	-0.13	-0.05	-0.04	0.04	0.03	-0.04	-0.03	-0.03	-0.01	0.03	-0.01	0.01	0.07	-0.1	0.07	-0.01	0.02	0.03	-0.12	-0.03	-0.04	-0.07	-0.03	0.02	0.01	0.01	-0.01	0.03	0.11
ATF5	0.17	0.12	0.15	0.22	-0.1	0.17	-0.23	0.19	0.19	-0.04	-0.01	0.02	0.19	0.19	0.14	0.19	0.09	0.24	0.2	-0.07	0.06	0.16	0.25	0.14	0.07	0.13	0.18	0.12	0.15	0.2	0.19	0.19	0.07	0.18	0.21	0.19	-0.05	0.11	0.18	0.18	-0.05	0.12	0.22	0.17	0.18	0.01	0.22	0.11	0.1
ATF6	0.12	-0.02	-0.06	0.01	0	-0.04	-0.03	-0.06	-0.12	-0.01	0.04	0.02	-0.05	-0.04	0.01	-0.02	0.01	-0.07	-0.06	0.04	-0.03	-0.04	-0.09	0.01	0.02	-0.07	-0.09	-0.04	0.05	0	-0.02	-0.03	-0.1	-0.07	-0.02	-0.11	0.05	0.1	-0.14	-0.06	-0.04	-0.03	-0.06	-0.03	-0.02	0.06	-0.1	0.2	0.01
ATF6B	-0.01	0.11	0.14	0.18	-0.04	0.14	-0.2	0.18	0.12	0	0.14	0.05	0.19	0.21	0.14	0.28	0.05	0.22	0.17	-0.09	0.09	0.22	0.17	0.23	0.18	0.16	0.09	0.06	0.14	0.25	0.14	0.17	0.26	0.21	0.2	0.14	0.01	0.03	0.23	0.12	-0.08	0.11	0.22	0.1	0.14	0.13	0.2	-0.05	0.06
ATF7	0.05	0.03	-0.06	0.01	-0.01	0.06	-0.06	0.04	-0.02	-0.02	0.02	-0.06	0.02	0.08	-0.02	0.04	0.01	0.06	0	0.05	-0.03	0.04	-0.01	0.03	0.09	0.03	-0.01	-0.03	0.08	-0.01	0.1	0	0.12	0	0.04	0.04	0.04	0.02	0.07	0.07	0.03	0.01	0.07	0	0.02	0.06	0.02	0.04	-0.05
ATF7IP	-0.19	0.04	0.09	0.03	0	0.08	-0.05	0.05	0.03	-0.01	0.08	0.07	0.09	0.09	0.08	0.01	0.02	0.09	0.01	-0.01	0.06	0.09	0.03	0.04	0	0.04	-0.03	0.04	0.01	0.04	0.02	0.02	-0.06	0.05	0.06	0.03	0.08	0.01	0.07	0.02	0.07	0.05	0.06	0.02	0.03	-0.01	0.03	0.02	0.04
ATF7IP2	-0.09	0.06	0.05	0.21	0.02	0.16	-0.11	0.06	0.08	-0.03	0.12	-0.01	0.19	0.23	0.06	0.16	-0.09	0.17	0.05	-0.01	0.09	0.11	0.09	0.2	0.07	0.09	0.01	0.01	0.11	0.2	0.11	0.11	0.12	0.14	0.17	0.08	0.01	0.01	0.2	0.08	0.03	0.09	0.21	0.08	0.11	0.03	0.05	-0.06	0.13
ATG10	0.13	0.06	0.07	0.07	0.02	0.04	0.07	0.09	0.08	0.05	-0.07	0.02	0.13	0.1	0.08	0.03	0	0.11	0.12	-0.13	0.15	0.09	0.12	0.07	0.06	0.15	0.08	0.06	0.07	0.06	0.04	0.05	-0.01	0.06	0.08	0.03	0.08	-0.01	0.03	0.02	0.06	0.02	0.12	0.11	0.03	0.02	0.02	0.09	0.02
ATG12	0.01	0	0.08	-0.07	0.01	-0.04	-0.02	0	-0.03	0.01	-0.15	0.03	-0.01	-0.06	-0.01	-0.07	-0.01	0.01	0.07	-0.22	0.12	0.02	0.04	-0.02	0.06	0.04	0.11	0.03	-0.04	-0.03	0.03	-0.02	-0.01	-0.01	-0.05	0.06	-0.05	-0.02	-0.09	0.03	0.01	0.02	0	-0.03	-0.02	-0.02	0.03	-0.04	-0.02
ATG13	-0.01	-0.02	0.06	0.05	-0.07	0.07	-0.14	-0.03	0.03	-0.06	0.01	-0.01	0.05	0.03	0.04	0.14	-0.1	0.12	0.05	-0.05	0.05	0.02	0.07	0.06	0.01	-0.02	0.07	-0.04	0.11	0.05	0.05	0.03	0	0.08	0.05	0.03	-0.03	0.07	0.01	0.02	-0.03	-0.02	0.07	0.03	0.07	0.03	0.12	0	-0.02
ATG14	-0.07	-0.05	-0.14	-0.1	0.09	-0.05	0.15	-0.03	-0.06	0.01	0.05	0.05	-0.09	-0.07	-0.01	-0.1	0.03	-0.1	-0.14	0.1	-0.01	-0.08	-0.13	-0.11	-0.11	-0.16	-0.11	-0.03	-0.04	-0.11	-0.1	-0.07	-0.11	-0.09	-0.1	-0.08	-0.01	0.08	-0.08	-0.09	0.01	-0.03	-0.19	-0.07	-0.09	0	-0.12	0	0.06
ATG16L1	-0.09	-0.04	-0.12	-0.1	-0.01	-0.04	0.1	-0.11	-0.1	0	-0.02	-0.08	-0.1	-0.12	-0.05	-0.12	-0.03	-0.16	-0.07	0.07	0.02	-0.13	-0.13	-0.02	-0.04	-0.13	-0.09	-0.06	-0.02	-0.06	-0.04	-0.09	0.08	-0.07	-0.11	-0.06	0.05	-0.07	-0.1	-0.09	0.03	-0.08	-0.13	-0.12	-0.05	0.03	-0.11	-0.06	0
ATG16L2	0.03	0.12	0.24	0.25	0	0.2	-0.22	0.23	0.21	0.01	0.09	0.01	0.25	0.17	0.11	0.34	0.17	0.29	0.22	-0.06	0.13	0.3	0.23	0.2	0.15	0.19	0.12	0.04	0.18	0.26	0.11	0.23	0.03	0.26	0.24	0.23	-0.01	-0.04	0.37	0.16	-0.05	0.14	0.29	0.13	0.18	0.07	0.3	-0.12	0.1
ATG2A	-0.12	-0.06	-0.04	-0.09	-0.05	0.03	-0.11	-0.09	-0.09	-0.02	0.13	0	-0.05	-0.02	-0.07	0	0.03	0.07	-0.09	0.02	0	0.01	-0.09	-0.03	-0.04	-0.04	-0.08	-0.02	-0.01	-0.01	0.02	-0.05	0.02	-0.03	-0.01	-0.04	0.08	0.05	0.01	-0.11	0.02	-0.03	-0.1	-0.03	0.01	0.06	0.04	0.01	0.02
ATG2B	0.02	0.14	0.2	0.17	0.02	0.18	-0.14	0.24	0.16	0.07	0.03	0.05	0.22	0.17	0.12	0.25	0.11	0.22	0.17	-0.12	0.21	0.26	0.23	0.13	0.07	0.21	0.18	0.13	0.09	0.19	0.13	0.18	-0.13	0.22	0.16	0.19	-0.08	0.01	0.23	0.17	-0.03	0.16	0.25	0.12	0.17	-0.04	0.27	-0.04	0.1
ATG3	-0.05	0.03	0.02	0.12	-0.08	0.01	-0.1	-0.01	-0.03	-0.1	-0.06	-0.07	0.06	0.12	0.06	0.09	0.03	0.1	0.05	-0.05	-0.01	-0.01	0.04	0.06	0.04	-0.09	-0.03	0.03	0.1	0.13	0.07	0.05	-0.12	0.04	0.1	0.07	0.03	0.06	0.05	0.07	-0.04	0.12	0.14	0.02	0.01	0.08	0.1	-0.02	-0.04
ATG4A	-0.03	0.09	0.07	0.04	-0.08	0.06	-0.16	0.11	0.08	-0.03	-0.06	-0.02	0.01	0.1	0.04	0.14	-0.01	0.1	0.08	-0.01	0.09	0.09	0.07	-0.01	0.11	0.09	0.04	0.1	0.08	0.03	0.1	0.09	-0.1	0.02	0.13	0.07	0.08	0.11	0.15	0.04	-0.02	0.09	0.07	0.09	0.06	0.06	0.14	0.11	-0.08
ATG4B	0.05	0.11	0.11	0.09	0	0.14	-0.03	0.05	0.12	-0.01	0.01	-0.02	0.17	0.2	0.03	0.18	-0.02	0.16	0.09	-0.02	-0.01	0.15	0.17	0.13	0	0.12	0.11	0.06	0.07	0.13	0.12	0.1	0.17	0.15	0.16	0.15	-0.02	0.15	0.24	0.1	0.03	0.04	0.18	0.07	0.19	-0.03	0.18	0.01	-0.01
ATG4C	0.01	0.14	0.23	0.27	0.06	0.19	-0.18	0.26	0.2	0.08	-0.1	-0.01	0.29	0.28	0.14	0.33	0.07	0.18	0.25	-0.05	0.11	0.24	0.29	0.14	0.12	0.15	0.21	0.06	0.17	0.23	0.17	0.25	-0.04	0.23	0.26	0.18	-0.04	-0.01	0.32	0.27	0	0.17	0.36	0.17	0.16	-0.05	0.26	0.07	0.03
ATG4D	0.11	0.09	0.01	0.18	-0.06	0.06	-0.16	0.14	0.17	-0.02	0.04	-0.04	0.12	0.21	0.09	0.2	-0.05	0.13	0.1	0.09	-0.08	0.1	0.15	0.11	-0.01	0.04	0.04	0.02	0.09	0.1	0.1	0.11	-0.01	0.21	0.16	0.14	-0.14	0.04	0.23	0.14	-0.04	0.09	0.22	0.13	0.06	-0.05	0.22	0.15	0.01
ATG5	0.01	-0.01	-0.05	-0.01	0.09	-0.01	0.2	-0.15	-0.03	0.04	-0.02	-0.01	-0.03	-0.09	0.01	-0.08	-0.03	0.05	-0.03	-0.04	0.1	-0.12	-0.04	-0.13	0.02	-0.03	-0.03	0.02	0.01	-0.01	-0.02	-0.04	0.04	-0.08	0.02	-0.16	0.1	0.03	-0.11	-0.02	0.06	-0.01	0.01	-0.02	-0.06	0.06	-0.15	0.04	0
ATG7	-0.02	-0.08	-0.02	-0.07	-0.03	-0.08	0.01	-0.18	-0.16	-0.04	-0.09	-0.06	-0.09	-0.09	-0.04	-0.11	0	-0.01	-0.02	-0.16	0.12	-0.14	-0.07	-0.08	0.04	-0.02	-0.04	0.03	0.01	0.01	-0.06	-0.09	-0.17	-0.08	-0.1	-0.11	0.02	0.05	-0.16	-0.12	0.04	-0.03	-0.08	-0.14	-0.13	0.07	-0.12	0.01	0.03
ATG9A	0.04	-0.09	-0.16	-0.2	0.02	-0.14	0.13	-0.14	-0.17	0	-0.17	-0.03	-0.19	-0.15	-0.09	-0.23	-0.11	-0.21	-0.05	-0.09	-0.06	-0.18	-0.1	-0.14	-0.11	-0.09	0.03	-0.04	-0.1	-0.15	-0.08	-0.14	-0.08	-0.17	-0.14	-0.18	0.06	0.03	-0.3	-0.13	0.05	-0.15	-0.18	-0.13	-0.15	-0.02	-0.2	0.04	-0.08
ATG9B	0.04	0.09	0.09	0.08	-0.02	0.09	-0.05	0.09	0.14	0.05	0.12	0.04	0.17	0.14	0.01	0.19	-0.03	0.16	0.11	0.09	-0.11	0.18	0.1	0.21	0.09	0.1	0.06	0.07	0.01	0.16	0.13	0.07	0.21	0.17	0.1	0.15	0	-0.04	0.23	0.07	0	0.05	0.15	0.05	0.13	0.04	0.2	0.11	0.05
ATHL1	0.01	0.05	0.01	0.12	-0.09	0.08	-0.11	0.06	0.03	-0.08	0.06	0.03	0.1	0.12	-0.01	0.1	-0.08	0.1	0.06	-0.03	0.05	0.03	0.03	0.12	0.04	-0.09	0.02	0.01	0.08	0.11	0.06	0.07	0.14	0.08	0.13	0.05	-0.02	0.01	0.07	0.1	0.03	0.05	0.1	0.03	0.1	0.05	0.04	0	0.16
ATIC	-0.03	0.09	0.09	0.2	-0.04	0.17	-0.06	0.08	0	0	-0.01	-0.03	0.18	0.22	0.03	0.15	-0.01	0.17	0.07	0.04	0.05	0.03	0.13	0.11	0.03	0	-0.01	-0.05	0.14	0.13	0.16	0.13	0.13	0.13	0.22	0.11	0	0.03	0.22	0.09	0.1	0.02	0.27	0.08	0.1	-0.05	0.1	0.07	0.1
ATL1	0.05	0	0	-0.06	-0.01	-0.04	0.07	0	0.03	0.08	0.02	0.03	-0.01	-0.12	-0.07	-0.1	0.06	-0.1	-0.04	0.08	0	-0.01	0.01	-0.07	-0.04	0.04	0.02	0.03	-0.14	-0.14	-0.06	-0.04	-0.15	0.01	-0.12	-0.08	-0.01	0	-0.09	0	-0.01	-0.05	-0.07	-0.04	-0.03	-0.07	0.01	0.14	0
ATL2	-0.08	0	-0.08	0.13	0.04	0.03	0.1	0.02	0.04	0.05	0.24	0.02	0.11	0.2	-0.01	0.09	0.01	0.14	-0.04	0.09	0.02	0.04	-0.03	0.13	0.06	-0.01	-0.05	-0.02	0.05	0.15	0.05	-0.01	0.24	0.15	0.08	0.11	-0.01	-0.06	0.26	-0.04	-0.04	0.05	0.17	0.06	0.08	0.04	0.05	-0.05	0.14
ATL3	-0.09	-0.12	-0.14	-0.13	0	-0.14	0.02	-0.16	-0.17	-0.03	-0.04	0.03	-0.25	-0.19	-0.14	-0.28	0.09	-0.09	-0.17	-0.06	0.04	-0.23	-0.2	-0.21	-0.05	-0.17	-0.12	-0.04	0.01	-0.1	-0.12	-0.18	-0.08	-0.23	-0.19	-0.16	0.1	0.11	-0.33	-0.15	0.05	-0.14	-0.25	-0.14	-0.14	0.09	-0.23	0.02	-0.01
ATM	-0.07	0.06	0.2	0.16	-0.09	0.17	-0.15	0.18	0.12	0.01	-0.14	-0.02	0.16	0.21	0.12	0.24	0.06	0.16	0.24	-0.23	0.21	0.16	0.21	0.15	0.1	0.04	0.21	0.09	0.09	0.19	0.19	0.19	0.1	0.2	0.2	0.18	-0.1	0.01	0.19	0.16	-0.02	0.17	0.24	0.11	0.12	0.03	0.25	-0.12	0.06
ATMIN	0.1	0.07	-0.05	-0.02	0.01	0.08	-0.01	0.06	0.03	0.05	0.1	0.04	0.02	-0.02	0.01	-0.04	-0.04	0.05	0	0.06	0.03	0.06	0.05	0.01	0.01	0.11	0.04	0.04	-0.11	-0.06	0.05	0.01	0.03	0.05	-0.04	0.02	0	0.1	0.04	-0.03	0	-0.02	-0.02	0.05	0.04	-0.11	0.04	0.2	-0.05
ATN1	0.03	-0.04	-0.05	-0.1	0.02	-0.04	0.04	-0.06	-0.08	0.05	0.04	0.01	-0.06	-0.11	-0.05	-0.14	-0.07	-0.13	-0.08	0.04	-0.18	-0.06	-0.05	-0.06	-0.1	-0.01	0	-0.06	-0.14	-0.12	-0.13	-0.09	0.2	-0.07	-0.11	-0.11	0.05	-0.03	-0.12	-0.09	-0.01	-0.07	-0.16	-0.07	-0.05	0	-0.08	-0.02	-0.02
ATOH1	0.06	0.08	0.05	0.03	-0.03	0.08	-0.04	0	-0.05	0.06	0.14	-0.01	0.08	0.13	0	0.06	-0.05	0.14	0	0.06	-0.01	0	0.04	0.08	0.03	0.09	-0.04	0.03	0.07	0.1	0.09	0.04	-0.09	0.06	0.1	0.03	0.01	0.09	0.13	0.04	0.05	0.05	0.1	0.03	0.1	0.02	0.05	0.16	0.03
ATOH7	-0.04	0.03	0.01	0.08	0.04	0.04	0.02	0.02	0.06	0.01	0.05	0.05	0.1	0.13	-0.03	0.1	-0.03	0.08	0	0.1	-0.05	0.06	0.05	0.07	0.07	-0.06	-0.02	0.03	0	0.04	0.05	0.05	0.12	0.09	0.09	0.08	-0.1	-0.07	0.2	0.06	-0.02	0.05	0.13	0.09	0.1	-0.09	0.09	0.04	0
ATOH8	0.14	-0.01	-0.01	-0.12	0.05	-0.07	0	-0.02	-0.03	0	-0.18	-0.03	-0.08	-0.12	0.01	-0.07	-0.01	-0.12	0.03	-0.04	-0.04	-0.09	0.01	-0.15	-0.08	0.01	0.12	0.11	-0.08	-0.14	-0.02	-0.05	-0.19	-0.07	-0.1	-0.11	0.04	0.08	-0.2	0	0.01	-0.03	-0.12	-0.04	-0.09	-0.05	-0.02	0.12	-0.1
ATOX1	0.01	-0.11	-0.07	-0.23	-0.11	-0.13	-0.06	-0.19	-0.24	-0.08	-0.23	-0.1	-0.3	-0.13	-0.09	-0.2	-0.07	-0.19	-0.13	-0.14	-0.04	-0.24	-0.23	-0.26	-0.1	-0.26	-0.09	0.03	-0.09	-0.21	-0.07	-0.2	-0.09	-0.3	-0.23	-0.16	0.01	0.02	-0.27	-0.1	0.06	-0.09	-0.24	-0.16	-0.12	-0.03	-0.16	0.14	-0.18
ATP10A	0.07	-0.01	0.09	-0.04	-0.07	-0.01	-0.05	0.03	0.07	0.03	-0.17	0	-0.01	-0.11	0.02	-0.01	-0.01	-0.15	0.05	-0.16	0.1	0.05	0.02	-0.04	0.02	-0.01	0.03	0.07	0.04	-0.02	0	-0.04	-0.19	-0.03	-0.03	-0.03	0.03	0.02	-0.12	0.08	-0.01	0.09	-0.04	-0.06	0	0.08	0.04	-0.03	-0.1
ATP10B	-0.11	-0.06	-0.15	-0.09	-0.05	-0.05	0.04	-0.07	-0.03	-0.06	0.08	-0.02	-0.07	0.08	-0.12	-0.03	-0.02	-0.05	-0.12	0.21	-0.15	-0.11	-0.15	-0.08	-0.04	-0.17	-0.15	-0.02	-0.02	-0.06	-0.07	-0.06	-0.06	-0.04	-0.05	0.03	-0.05	0	0	-0.03	-0.02	-0.06	-0.07	-0.1	-0.03	0.04	0.01	-0.07	0
ATP10D	-0.01	-0.1	0.02	-0.09	0.05	-0.17	-0.02	-0.07	-0.04	-0.01	-0.05	-0.01	-0.09	-0.13	-0.01	-0.16	0	-0.08	0	-0.23	0	-0.09	-0.09	-0.14	-0.09	-0.05	0.05	0.13	-0.13	-0.01	-0.08	-0.09	-0.22	-0.11	-0.1	-0.14	-0.06	0.14	-0.28	-0.07	0.02	-0.03	-0.16	-0.07	-0.13	0.03	-0.15	0.09	0.09
ATP11A	-0.04	0	-0.07	0.02	-0.01	0.03	0.19	-0.01	0.04	-0.02	0.1	0.01	-0.06	0.05	-0.06	0.05	0.01	-0.01	-0.12	0.17	-0.11	0.03	-0.08	0.08	-0.05	-0.05	-0.13	-0.09	0.05	0.01	-0.07	-0.08	0.1	0	0.05	0.07	0.01	0.03	0.1	-0.1	0.05	-0.03	-0.03	-0.01	0.05	0.1	-0.02	0	-0.04
ATP11B	-0.01	0.02	0	0.19	-0.03	0.05	-0.15	0.04	0.04	-0.08	0.14	-0.03	0.1	0.16	0.01	0.17	0.07	0.18	0.05	-0.04	0.08	0.03	0.08	0.1	0.1	0.04	0.06	-0.01	0.09	0.22	0.09	0.12	-0.07	0.1	0.16	0.05	0.01	0.06	0.12	0.08	-0.09	0.08	0.21	0.08	0.07	0.05	0.09	-0.03	0.12
ATP11C	-0.12	0.01	0.22	0.15	-0.01	0.08	-0.14	0.14	0.08	0.01	-0.08	0.02	0.19	0.05	0.09	0.1	0.02	0.15	0.16	-0.09	0.22	0.14	0.19	0.11	0.02	0.16	0.13	0.09	0.1	0.19	0.15	0.15	0.19	0.11	0.14	0.05	0	-0.02	0.13	0.08	-0.01	0.06	0.17	0.14	0.11	-0.09	0.06	-0.15	0.08
ATP12A	-0.08	-0.01	0.08	0.09	-0.04	0.08	0	0.09	0	0	0.06	-0.04	0.06	0.2	-0.03	0.1	0.04	0.14	0.04	-0.01	-0.03	0.06	0.03	0	0.05	0	-0.04	0.01	0.02	0.11	0.1	0.07	0.06	0.08	0.06	0.06	-0.01	-0.09	0.16	0.09	0	0.12	0.14	0	0.09	0.07	0.1	-0.09	-0.02
ATP13A1	0.04	0.12	0.08	0.13	-0.15	0.15	-0.26	0.1	0.08	0.01	-0.02	-0.02	0.18	0.18	0.11	0.19	-0.03	0.18	0.17	-0.02	0.08	0.16	0.17	0.19	0.06	0.06	0.06	0.07	0.13	0.14	0.18	0.13	0.05	0.26	0.15	0.14	0	0.03	0.17	0.12	0.07	0.09	0.22	0.08	0.11	0.03	0.16	0.07	0
ATP13A2	0.07	0	-0.21	-0.17	0	-0.08	0.17	-0.12	-0.06	-0.06	0	-0.01	-0.18	0	-0.1	-0.11	-0.02	-0.16	-0.15	0.12	-0.05	-0.15	-0.16	-0.08	-0.1	-0.14	-0.14	-0.11	-0.05	-0.15	-0.11	-0.12	0.14	-0.13	-0.13	-0.09	0.06	0.11	-0.1	-0.14	0.03	-0.14	-0.2	-0.07	-0.06	0.11	-0.13	0.02	-0.12
ATP13A3	-0.14	-0.02	-0.01	0	0	-0.1	-0.01	0	0.01	-0.06	0.04	-0.01	-0.07	-0.06	-0.02	0.04	0	-0.03	-0.04	-0.05	-0.08	-0.02	-0.02	0.01	0.07	0.01	0.02	-0.01	0.05	0.03	-0.05	-0.02	0.02	-0.04	0	-0.05	-0.02	0.01	0.02	-0.08	-0.02	-0.01	-0.02	0	-0.04	0.01	-0.02	-0.09	-0.05
ATP13A4	0.01	0.06	0.1	0.14	0	0.12	-0.1	0.15	0.06	-0.01	0.07	-0.01	0.13	0.23	0.08	0.19	0.03	0.22	0.11	-0.04	0.02	0.09	0.12	0.09	0.08	0.1	0.06	0.06	0.08	0.14	0.16	0.16	-0.12	0.1	0.14	0.08	0.08	0.07	0.21	0.11	-0.06	0.15	0.16	0.05	0.08	0.02	0.16	0.08	0.08
ATP13A5	0.04	0.07	0.02	0.06	0.02	0.1	-0.04	0.17	0.08	0.04	0.04	-0.03	0.06	0.1	0.05	0.05	-0.02	0.15	0.05	0.03	-0.04	0.03	0.04	0.02	0.08	0	-0.03	0.04	0.06	0.04	0.08	0.06	-0.05	0.05	0.09	-0.02	0	0.08	0.18	0.05	0	0.1	0.05	0.04	0.05	0.04	0.04	0.03	-0.01
ATP1A1	-0.13	-0.15	-0.24	-0.17	-0.03	-0.16	0.08	-0.19	-0.08	-0.08	0.06	-0.06	-0.21	-0.02	-0.08	-0.14	-0.1	-0.12	-0.19	0.22	-0.17	-0.25	-0.25	-0.09	-0.12	-0.25	-0.14	-0.04	-0.04	-0.15	-0.13	-0.17	0.07	-0.1	-0.16	-0.08	0.06	0	-0.12	-0.18	0.02	-0.15	-0.2	-0.09	-0.13	0.01	-0.15	-0.06	-0.07
ATP1A1OS	-0.02	0.07	0.05	0.13	-0.01	0.11	-0.09	0.12	0.04	0.03	0.11	-0.03	0.07	0.2	0.11	0.12	-0.01	0.14	0.05	0.04	0	0.1	0.03	0.1	0.04	0.01	0.02	0.06	0.1	0.06	0.03	0.09	-0.04	0.11	0.14	0.03	-0.06	0.01	0.18	0.09	-0.04	0.08	0.13	0.03	0.06	-0.01	0.15	-0.03	0.03
ATP1A2	-0.03	0.04	0.07	0.1	0.05	0.04	-0.02	0.04	0	0.01	-0.03	-0.01	0.1	0.11	0.06	0.08	0.01	0.07	0.07	-0.07	0.03	0.07	0.07	0.05	0.15	0.02	0.03	0.05	0.07	0.07	0.11	0.11	-0.14	0.05	0.12	0.01	0.03	0.05	0.07	0.06	-0.02	0.03	0.11	0.04	0.05	0.03	0.05	-0.04	0.03
ATP1A3	0.11	0.12	0.18	0.23	-0.01	0.18	-0.11	0.21	0.18	0.09	0.06	0.05	0.27	0.17	0.13	0.26	-0.01	0.19	0.13	0.01	0.09	0.24	0.2	0.23	0.09	0.14	0.07	0	0.09	0.18	0.12	0.16	0.01	0.23	0.22	0.2	0.01	0.04	0.26	0.17	0.01	0.13	0.3	0.19	0.17	-0.1	0.21	0.08	0.04
ATP1A4	0.02	0.06	0.03	0.09	0	0.14	-0.04	0.06	0.09	0.01	0.06	0.05	0.14	0.17	0.03	0.17	-0.01	0.17	0.1	-0.03	-0.02	0.13	0.13	0.09	0.11	0.11	0.08	0.03	0.07	0.07	0.08	0.09	0.06	0.12	0.12	0.06	0.05	-0.03	0.19	0.11	0.01	0.07	0.17	0.04	0.08	0	0.12	0.11	-0.01
ATP1B1	-0.08	-0.14	-0.26	-0.29	0.09	-0.24	0.34	-0.2	-0.11	-0.04	0.11	0	-0.27	-0.36	-0.17	-0.39	-0.07	-0.34	-0.32	0.24	-0.25	-0.23	-0.35	-0.19	-0.14	-0.22	-0.28	-0.1	-0.21	-0.3	-0.27	-0.3	-0.25	-0.25	-0.26	-0.2	0.09	-0.01	-0.32	-0.29	0.06	-0.19	-0.42	-0.13	-0.18	-0.03	-0.31	0.01	-0.08
ATP1B2	0.02	0.05	0.1	0.11	0.05	0.11	0.01	0.02	0.04	0.04	0.09	0.02	0.13	0.2	0.04	0.12	-0.03	0.11	0.02	0	0	0.04	0.09	0.08	0.07	0.07	0.01	-0.02	0.07	0.09	0.08	0.1	-0.01	0.12	0.1	0.04	-0.12	-0.03	0.17	0.11	-0.03	0.09	0.15	0.07	0.04	0.02	0.1	-0.08	0.05
ATP1B3	-0.14	-0.08	-0.22	0	-0.01	-0.1	-0.01	-0.17	-0.23	-0.05	-0.02	-0.05	-0.11	0.11	-0.08	-0.15	-0.02	0.02	-0.07	-0.03	-0.1	-0.2	-0.13	-0.09	-0.05	-0.17	-0.09	0.01	0.06	0	-0.01	-0.08	-0.09	-0.07	-0.11	-0.07	-0.08	0.06	-0.19	-0.05	0.03	-0.05	-0.04	-0.12	-0.11	0.03	-0.11	0.01	0.04
ATP1B4	0.02	0.03	0.14	0.12	-0.01	0.1	-0.1	0.08	0.06	-0.02	0.09	0	0.12	0.15	0.05	0.17	-0.01	0.21	0.05	-0.07	0.08	0.05	0.07	0.08	0.14	0.04	0.06	0.08	0.1	0.14	0.14	0.12	0.1	0.06	0.14	0.11	-0.04	0	0.2	0.1	0.02	0.07	0.14	0.06	0.05	0.04	0.13	0.04	0.06
ATP2A1	0.01	0.03	0.08	0.19	-0.03	0.1	-0.07	0.13	0.07	0.03	0.03	-0.04	0.17	0.22	0	0.18	0.01	0.21	0.08	-0.05	0.04	0.14	0.11	0.17	0.1	0.11	0.02	-0.01	0.16	0.19	0.09	0.13	0.11	0.16	0.18	0.11	0.01	0.09	0.31	0.11	-0.03	0.13	0.22	0.06	0.16	0.05	0.16	-0.02	0.08
ATP2A2	-0.06	-0.09	-0.15	-0.04	0.04	-0.13	0.2	-0.13	-0.14	0	0.06	0	-0.08	0	-0.03	-0.05	-0.04	-0.07	-0.11	0.09	-0.19	-0.07	-0.08	-0.08	-0.03	-0.06	-0.05	-0.04	-0.08	-0.16	-0.01	-0.07	0	-0.08	-0.11	-0.08	-0.12	0.06	-0.01	-0.05	0	-0.06	-0.05	-0.01	-0.09	-0.04	-0.09	-0.01	0.06
ATP2A3	0.05	0.17	0.11	0.24	0	0.21	-0.15	0.23	0.23	0.02	0.19	0.04	0.29	0.31	0.09	0.37	0.06	0.27	0.19	0.11	0	0.3	0.25	0.24	0.12	0.25	0.04	-0.01	0.17	0.28	0.17	0.22	0.27	0.31	0.28	0.19	-0.03	0.03	0.44	0.21	-0.05	0.2	0.36	0.15	0.25	0.07	0.29	0.06	0.02
ATP2B1	-0.01	0.05	-0.06	-0.09	0.04	-0.06	0.1	-0.06	-0.05	0.03	-0.03	0.01	-0.07	-0.1	-0.04	-0.08	0.06	-0.11	-0.01	-0.04	-0.04	-0.03	-0.03	-0.08	0.02	0.06	0.04	0.05	-0.09	-0.11	-0.04	-0.06	-0.02	-0.06	-0.07	-0.02	0.02	0.01	-0.1	-0.04	0.02	-0.02	-0.09	0.03	0.02	0	-0.1	-0.05	0.02
ATP2B2	0.03	0.05	0.12	0.09	0	0.07	-0.1	0.11	0.07	0.03	0.07	0.01	0.12	0.24	0.02	0.16	0.06	0.19	0.02	-0.02	-0.08	0.11	0.06	0.05	0.06	0.05	0.01	0.07	0.1	0.12	0.1	0.15	-0.03	0.11	0.1	0.08	-0.03	0	0.27	0.1	-0.05	0.11	0.16	0.03	0.06	0.02	0.15	0.02	0
ATP2B3	0	0.1	0.17	0.24	-0.04	0.14	-0.16	0.17	0.15	0.08	0.05	0.04	0.22	0.22	0.07	0.27	0.08	0.2	0.12	-0.01	0.02	0.21	0.17	0.13	0.11	0.11	0.1	0.06	0.14	0.18	0.17	0.2	0.04	0.22	0.18	0.11	0	-0.05	0.36	0.2	-0.03	0.12	0.28	0.09	0.13	-0.03	0.25	0.01	0.05
ATP2B4	0.06	-0.1	0.02	-0.11	-0.02	-0.03	-0.01	-0.01	-0.02	0.02	-0.1	0.05	-0.08	-0.12	0.03	-0.06	0.04	-0.13	0.04	-0.18	0.14	-0.01	0.01	-0.06	-0.06	-0.02	0.06	0.02	-0.04	0.01	-0.07	-0.05	-0.12	-0.04	-0.11	-0.07	0.06	-0.08	-0.24	-0.07	0.01	0.01	-0.13	-0.11	-0.07	0.09	-0.1	-0.1	-0.01
ATP2C1	-0.11	-0.1	-0.1	-0.12	0.07	-0.19	0.15	-0.07	-0.09	-0.09	0.02	-0.02	-0.12	-0.06	-0.1	-0.16	0.01	-0.1	-0.08	0	-0.02	-0.13	-0.11	-0.12	-0.07	-0.03	-0.07	0.01	-0.08	-0.07	-0.09	-0.1	-0.18	-0.14	-0.11	-0.13	-0.05	0.11	-0.12	-0.13	-0.06	-0.06	-0.15	-0.08	-0.06	-0.01	-0.14	-0.04	-0.03
ATP2C2	-0.07	-0.04	-0.19	-0.04	-0.02	0.01	0.14	-0.11	-0.08	-0.06	0.34	0.03	-0.05	-0.05	-0.1	-0.05	-0.08	-0.04	-0.24	0.38	-0.17	-0.12	-0.24	-0.01	0	-0.17	-0.27	-0.12	-0.08	-0.13	-0.08	-0.12	0.04	-0.05	-0.07	-0.03	0.02	-0.1	0.02	-0.12	0.03	-0.09	-0.12	-0.05	-0.05	0.04	-0.11	0.06	0.04
ATP4A	-0.01	0.09	0.02	0.06	0.02	0.14	-0.08	0.03	0.01	-0.03	0.04	0.05	0.02	0.15	0.01	0.14	-0.04	0.09	-0.03	-0.02	-0.09	0.04	0.02	0.01	0.07	-0.07	-0.05	0.03	0.12	0.05	0.06	0.04	-0.21	-0.01	0.06	0	-0.09	-0.11	0.22	0.09	0.08	0.07	0.13	0.01	0.07	0	0.07	0.06	-0.04
ATP4B	0.09	0.07	0.03	0.04	-0.04	0.03	-0.14	0.12	0.03	-0.04	0.01	-0.06	0	0.11	-0.01	0.09	0.03	0.11	-0.01	-0.03	-0.07	0.05	-0.02	0.02	0.09	-0.04	-0.03	0.01	0.07	0.01	0.07	0.09	-0.01	0.01	0.06	0.1	-0.06	0.03	0.1	0.07	-0.06	0.05	0.1	0.02	0.04	0.02	0.13	0.03	-0.05
ATP5A1	0.02	0.17	0.17	0.25	-0.04	0.23	-0.23	0.27	0.22	0.05	-0.06	-0.01	0.27	0.34	0.12	0.31	0.1	0.33	0.28	-0.01	0.09	0.33	0.32	0.22	0.08	0.25	0.17	0.13	0.22	0.21	0.25	0.28	0.09	0.29	0.28	0.25	-0.03	0.01	0.37	0.21	0.02	0.15	0.39	0.2	0.21	-0.05	0.31	0.01	0.02
ATP5B	-0.02	0.08	0.01	0.16	-0.04	0.09	-0.07	0.09	0.09	-0.02	0	-0.02	0.19	0.21	0.11	0.16	-0.07	0.1	0.04	0.14	-0.04	0.12	0.14	0.18	0.08	0.07	-0.03	-0.02	0.18	0.1	0.13	0.13	0.03	0.18	0.17	0.13	0.04	0.05	0.26	0.07	0.03	0.08	0.28	0.15	0.11	-0.03	0.09	0.02	0
ATP5C1	-0.03	0.03	-0.02	0	0.03	0.08	0.02	-0.01	-0.02	0	-0.02	0	0.05	0.06	0.02	0.05	-0.01	0.03	-0.02	0.03	0.06	0.05	0.02	0.06	0.01	0.03	-0.05	-0.08	0.08	0.04	0.06	0.02	0.05	-0.04	0.08	-0.01	0	-0.01	0.1	-0.01	0.1	0.01	0.1	0.03	0.03	0.02	-0.04	-0.07	-0.11
ATP5D	0.04	0.06	-0.03	0.18	-0.06	0.08	-0.09	0.06	-0.04	-0.01	-0.07	-0.05	0.11	0.26	0.05	0.1	-0.05	0.22	0.09	0.01	-0.02	0.09	0.09	0.16	0.07	-0.02	0.02	0.02	0.1	0.07	0.18	0.09	0.25	0.13	0.12	0.05	-0.01	-0.05	0.17	0.12	0.04	0.04	0.22	0.08	0.08	-0.05	0.11	0.04	0
ATP5F1	-0.05	0.03	0.06	0.16	0.02	0.09	0.03	0	-0.03	0.02	-0.07	-0.02	0.09	0.19	0.12	0.05	-0.09	0.15	0.07	-0.05	-0.02	-0.03	0.09	0.07	0.07	0.05	0.01	0.04	0.17	0.07	0.08	0.09	0.03	0.06	0.15	0.01	0.01	-0.01	0.08	0.09	0.09	0.14	0.19	0.06	0	-0.05	0.03	0.03	-0.05
ATP5G1	-0.04	0	0.03	0.07	-0.04	0.02	-0.07	0.04	-0.01	0.01	-0.04	-0.07	0	0.1	0.02	0.05	-0.04	0.11	0.04	0	-0.07	0.02	-0.01	0.01	0.01	0.03	-0.08	0.01	0.07	-0.03	0.08	0.01	-0.06	0.01	0.06	0	-0.06	-0.02	0.14	0.04	0.01	0.12	0.14	0.04	0.04	-0.11	0.01	0.07	-0.06
ATP5G2	-0.01	0.09	0.16	0.22	-0.07	0.15	-0.22	0.25	0.16	0.07	-0.04	-0.01	0.29	0.21	0.15	0.28	0.01	0.16	0.2	-0.03	0.07	0.24	0.26	0.24	0.14	0.17	0.15	0.03	0.15	0.18	0.19	0.18	0.12	0.24	0.21	0.16	-0.02	0.01	0.33	0.19	-0.01	0.1	0.34	0.15	0.18	-0.07	0.15	0.04	0.04
ATP5G3	-0.02	0.04	-0.04	0.13	-0.06	0.09	-0.07	0.05	0.06	-0.01	-0.01	-0.04	0.07	0.23	0.07	0.12	-0.04	0.07	0.03	0.08	-0.05	0.03	0.06	0.08	0.01	-0.01	0.01	-0.01	0.1	0.07	0.14	0.06	0.22	0.07	0.17	0.08	-0.02	0.06	0.18	0.08	0.07	0.13	0.23	0.1	0.08	-0.05	0.06	0.04	-0.05
ATP5I	0.03	0.06	0.01	0.14	-0.04	0.07	-0.1	0.01	0.07	0.02	-0.04	-0.01	0.1	0.09	0.07	0.06	0	0.14	0.02	0.07	-0.01	0.08	0.07	0.07	0.06	0.07	0.04	0.02	0.03	0	0.07	0.05	0.21	0.07	0.12	0.04	-0.04	0	0.11	0.05	0.06	0.07	0.17	0.14	0.07	-0.08	0.06	0.12	-0.04
ATP5J	0.09	0.08	0.1	0.11	-0.02	0.1	-0.02	0.15	0.13	0.02	-0.09	0.01	0.11	0.17	0.14	0.14	0.05	0.08	0.11	0.02	0.05	0.13	0.17	0.08	0.02	0.06	0.04	0	0.06	0.04	0.13	0.14	0.12	0.11	0.18	0.11	0.02	-0.03	0.11	0.09	0.01	0.13	0.2	0.17	0.07	-0.02	0.13	0.04	-0.1
ATP5J2	0.11	0.02	0.03	0.04	-0.13	0.01	-0.15	0.04	0.06	0.01	-0.07	-0.01	0.05	0.18	0.07	0.07	-0.02	0.1	0.06	0.02	-0.01	0.05	0.02	0.07	0.01	-0.05	-0.04	0.11	0.06	0.04	0.13	0.01	-0.02	0.09	0.03	0.07	-0.07	-0.04	0.14	0.08	0.08	0.03	0.11	0.01	0.03	-0.06	0.08	0.1	-0.08
ATP5L	0.01	0.08	0.1	0.15	-0.04	0.12	-0.09	0.11	0.1	-0.06	0	0.05	0.14	0.16	0.08	0.14	0.02	0.14	0.04	-0.01	-0.03	0.08	0.14	0.12	0.09	0	0.05	-0.03	0.13	0.05	0.12	0.15	0.09	0.1	0.21	0.12	-0.01	0.08	0.22	0.1	0.05	0.08	0.19	0.14	0.15	-0.02	0.12	0.02	-0.04
ATP5O	0.15	0.13	0.21	0.19	-0.08	0.14	-0.16	0.17	0.16	0.01	-0.02	0	0.21	0.25	0.18	0.21	0.01	0.18	0.11	-0.02	0.1	0.2	0.18	0.18	0.04	0.13	0	0.01	0.2	0.17	0.14	0.14	-0.02	0.2	0.22	0.13	-0.01	0.1	0.26	0.08	0.05	0.17	0.29	0.13	0.09	-0.06	0.11	0.07	-0.03
ATP5S	-0.1	0.06	0.03	0.19	0.06	0.12	0.07	0.15	0.12	-0.04	0.11	0.06	0.12	0.18	0.05	0.18	0.05	0.24	0.04	0.1	0.03	0.09	0.06	0.07	0.08	-0.02	-0.04	0.03	0.09	0.11	0.08	0.11	0.03	0.14	0.16	0.09	0	0.05	0.25	0.09	-0.01	0.09	0.16	0.14	0.12	0.01	0.12	0.01	0.08
ATP5SL	0.1	0.07	0.15	0.14	-0.02	0.09	-0.05	0.14	0.14	0.03	-0.01	0	0.18	0.17	0.11	0.14	0.01	0.16	0.15	0.03	0.01	0.08	0.21	0.12	0.02	0.12	0.08	0.01	0.18	0.09	0.13	0.09	-0.03	0.17	0.17	0.12	0.01	0.08	0.24	0.08	0.01	0.08	0.19	0.14	0.11	-0.04	0.04	0.04	0.02
ATP6AP1	-0.02	0.01	-0.14	-0.21	-0.03	-0.12	-0.04	-0.07	-0.04	-0.02	-0.02	0.05	-0.18	-0.17	-0.05	-0.09	-0.07	-0.19	-0.09	0.07	-0.07	-0.05	-0.09	-0.09	-0.04	-0.02	-0.03	0.01	-0.06	-0.16	-0.12	-0.11	-0.02	-0.13	-0.16	-0.11	0.07	-0.03	-0.13	-0.16	-0.03	-0.08	-0.23	-0.05	0	0.01	-0.07	-0.01	-0.22
ATP6AP1L	0.08	0.07	0.16	0.08	0.04	0.08	-0.02	0.1	0.1	-0.01	0.02	0.02	0.12	0.07	0.1	0.21	0.04	0.08	0.13	-0.04	0.12	0.18	0.13	0.1	0.08	0.1	0.09	0.07	0.04	0.16	0.08	0.14	-0.06	0.12	0.09	0.14	0.03	-0.06	0.19	0.09	-0.04	0.13	0.12	0.04	0.03	0.04	0.19	0	0.05
ATP6AP2	-0.08	-0.07	-0.09	-0.29	-0.03	-0.18	0.01	-0.07	-0.07	-0.05	-0.13	0.06	-0.29	-0.23	-0.08	-0.21	-0.04	-0.28	-0.13	-0.05	-0.04	-0.13	-0.17	-0.18	-0.07	-0.07	-0.09	-0.01	-0.09	-0.26	-0.18	-0.14	-0.16	-0.25	-0.22	-0.16	0.09	-0.04	-0.31	-0.16	-0.06	-0.1	-0.32	-0.1	-0.15	-0.03	-0.17	-0.04	-0.22
ATP6V0A1	-0.07	0	-0.02	-0.07	-0.09	-0.04	-0.05	-0.04	0.04	-0.01	-0.01	0.03	-0.05	-0.07	-0.01	0	-0.09	-0.04	-0.08	0.09	-0.17	0.04	-0.05	0.05	0.02	0.05	0.02	-0.08	0	-0.13	-0.07	-0.06	0.16	-0.04	-0.02	0.05	0.07	0.06	0.03	-0.12	0.04	-0.01	-0.02	0.05	0.06	-0.1	0.05	-0.02	-0.11
ATP6V0A2	0	0.14	0.16	0.29	0.02	0.18	-0.18	0.21	0.24	0.04	0.03	-0.01	0.31	0.33	0.09	0.39	0.18	0.29	0.3	-0.02	0.06	0.32	0.35	0.25	0.15	0.29	0.18	0.02	0.16	0.27	0.23	0.32	0.22	0.36	0.3	0.3	-0.1	-0.05	0.49	0.22	-0.07	0.12	0.42	0.17	0.22	0.02	0.36	-0.07	0.06
ATP6V0A4	0.01	-0.1	-0.14	-0.17	-0.04	-0.12	0.05	-0.13	-0.05	-0.09	0.02	0.01	-0.22	-0.12	-0.08	-0.08	-0.05	-0.21	-0.13	0.04	-0.15	-0.14	-0.2	-0.12	-0.05	-0.23	-0.15	-0.02	0.01	-0.15	-0.1	-0.2	-0.07	-0.18	-0.07	-0.02	-0.04	-0.07	-0.14	-0.08	-0.03	-0.07	-0.17	-0.09	-0.08	0.11	-0.12	-0.01	-0.11
ATP6V0B	0.04	0.06	-0.08	0.04	0.01	-0.01	-0.16	0.05	0.09	0	-0.05	0.02	-0.04	0.16	0.01	0.13	0.02	0.05	0.05	0.05	-0.14	0.06	0.04	0	0	0.04	0.03	0	0.08	-0.03	0.03	0.05	0.02	0.03	0.07	0.05	0.02	0.02	0.18	0.04	-0.01	0.03	0.09	0.05	0.04	0	0.18	0.1	-0.15
ATP6V0C	0.02	-0.05	-0.2	-0.2	-0.07	-0.15	0.01	-0.19	-0.17	-0.05	-0.08	-0.01	-0.25	-0.19	-0.08	-0.17	-0.15	-0.2	-0.18	0.04	-0.17	-0.14	-0.24	-0.14	-0.09	-0.18	-0.11	-0.05	-0.13	-0.23	-0.15	-0.2	0	-0.23	-0.21	-0.11	0.07	0.1	-0.21	-0.2	0.08	-0.12	-0.26	-0.11	-0.11	-0.04	-0.09	0.17	-0.17
ATP6V0D1	-0.06	-0.02	-0.11	-0.17	-0.07	-0.05	-0.03	-0.14	-0.11	-0.02	-0.11	-0.01	-0.21	-0.11	-0.06	-0.15	-0.07	-0.14	-0.15	-0.1	0	-0.09	-0.15	-0.13	-0.06	-0.1	-0.06	0.07	-0.12	-0.16	-0.06	-0.18	-0.02	-0.15	-0.16	-0.08	0.12	0.09	-0.14	-0.1	0.05	-0.04	-0.21	-0.12	-0.09	-0.01	-0.05	0.07	-0.17
ATP6V0D2	-0.04	0.04	0	0.03	0	0.05	0.05	0.2	0.07	0.01	-0.02	-0.03	0.01	0.11	0.05	0.09	0.03	0.09	0.06	-0.13	0.02	0.15	0.02	0.05	0.07	0.03	0.02	0.04	0.04	0.09	0.04	0.04	0.03	0.05	0.09	0.1	0.02	-0.03	0.09	-0.01	-0.03	0.11	0.02	0.04	0	0.02	0.11	-0.1	0.03
ATP6V0E1	-0.03	-0.13	-0.12	-0.34	-0.03	-0.23	0.07	-0.17	-0.19	-0.05	-0.12	0	-0.32	-0.34	-0.09	-0.35	-0.11	-0.36	-0.2	-0.12	-0.01	-0.22	-0.29	-0.23	-0.11	-0.17	-0.14	-0.01	-0.17	-0.26	-0.19	-0.29	-0.23	-0.3	-0.28	-0.25	0.08	0.05	-0.46	-0.25	0.06	-0.12	-0.42	-0.22	-0.18	0.04	-0.26	0.12	-0.15
ATP6V0E2	0.15	0.04	0.01	-0.07	-0.05	0	0.02	0.05	0.07	0.05	-0.17	0.01	-0.07	-0.09	-0.02	-0.02	-0.06	-0.12	-0.04	0.03	-0.12	0.05	0.01	-0.05	0.02	-0.02	-0.04	0.01	-0.02	-0.18	-0.02	-0.02	0.01	-0.02	-0.08	0.03	0.01	-0.1	0.04	0	0.03	-0.02	-0.05	0.06	0.01	-0.1	0.09	0.05	-0.16
ATP6V0E2-AS1	0.14	0.12	0.1	0.05	-0.05	0.02	-0.03	0.09	0.11	0.05	-0.16	0.04	0.01	0.05	0.03	0.01	0.01	0	0.03	-0.02	-0.01	0.07	0.07	-0.03	0.02	0.03	-0.01	0.02	0.01	-0.06	-0.03	0.05	-0.09	0.02	0	0.02	-0.02	0.06	0.07	0.03	0.04	0.04	0.06	0.08	0.05	-0.09	0.12	0.18	-0.09
ATP6V1A	-0.21	-0.04	-0.11	-0.07	-0.05	-0.05	-0.05	-0.03	-0.1	-0.07	-0.01	-0.04	-0.1	0.05	-0.03	-0.01	-0.04	-0.07	-0.1	0.01	-0.03	0.02	-0.08	0.03	0.01	-0.03	-0.09	-0.05	-0.03	-0.08	-0.01	-0.05	-0.08	-0.06	-0.01	0.02	0.01	0.06	0.05	-0.13	0.02	0.04	-0.04	0.01	0	-0.05	-0.01	-0.13	-0.15
ATP6V1B1	-0.01	-0.03	-0.09	-0.11	0.01	-0.06	0.1	-0.07	-0.11	0.02	0.14	0.04	-0.1	-0.03	-0.01	-0.1	-0.1	-0.06	-0.11	0.07	-0.15	-0.08	-0.12	-0.08	-0.08	-0.07	-0.07	0.03	-0.1	-0.15	-0.07	-0.09	-0.07	-0.09	-0.14	-0.04	-0.02	0.03	-0.11	-0.1	0.03	-0.03	-0.15	-0.04	-0.07	-0.05	-0.09	0.02	-0.06
ATP6V1B2	-0.04	0.04	0.1	0.09	-0.1	0.08	-0.09	0.08	0.13	-0.06	-0.17	-0.04	0.09	0.15	0.04	0.2	-0.02	0.11	0.22	-0.08	0.08	0.14	0.22	0.11	0.03	0.12	0.19	0.04	0.07	0.08	0.1	0.15	0.07	0.15	0.09	0.14	-0.12	0.03	0.15	0.13	-0.03	0.04	0.16	0.07	0.05	-0.04	0.23	-0.14	-0.04
ATP6V1C1	-0.05	0.01	-0.11	-0.11	-0.04	-0.03	0	-0.11	-0.07	-0.06	-0.08	-0.02	-0.17	-0.12	-0.02	-0.07	-0.09	-0.18	-0.13	-0.05	-0.05	-0.17	-0.1	-0.07	0.04	-0.14	-0.06	-0.08	0.1	-0.11	-0.03	-0.11	0.06	-0.12	-0.05	-0.01	0	0.07	-0.15	-0.09	0.01	0	-0.11	-0.05	-0.06	0.07	-0.07	-0.1	-0.11
ATP6V1C2	-0.11	0.02	-0.05	0.06	0.02	0.05	-0.05	0.02	0.03	-0.01	0.22	0.01	0.09	0.16	-0.01	0.12	0.08	0.13	-0.01	0.24	-0.11	0.1	-0.03	0.07	0.02	0.05	-0.08	-0.04	-0.02	0.01	0.05	0.05	0.18	0.1	0.05	0.07	-0.01	-0.04	0.17	0.07	-0.07	0.04	0.07	0.01	0.08	0.04	0.14	-0.03	0.05
ATP6V1D	-0.05	-0.12	-0.16	-0.25	0.1	-0.17	0.23	-0.2	-0.19	-0.04	-0.08	0.01	-0.28	-0.24	-0.1	-0.32	-0.01	-0.24	-0.24	0.01	0.07	-0.25	-0.28	-0.29	-0.13	-0.22	-0.17	-0.03	-0.08	-0.3	-0.16	-0.2	-0.38	-0.28	-0.23	-0.23	0.06	0.11	-0.37	-0.14	0.05	-0.17	-0.37	-0.13	-0.16	0.02	-0.24	0.12	-0.04
ATP6V1E1	0.01	-0.07	-0.14	-0.18	-0.05	-0.11	-0.04	-0.19	-0.06	-0.05	-0.12	-0.07	-0.19	-0.12	-0.07	-0.14	-0.09	-0.2	-0.06	-0.1	-0.02	-0.17	-0.12	-0.17	-0.12	-0.1	-0.03	0.02	-0.09	-0.12	-0.1	-0.13	-0.09	-0.17	-0.15	-0.08	0.06	0	-0.23	-0.11	-0.03	-0.04	-0.22	-0.1	-0.13	0.04	-0.12	0.08	-0.07
ATP6V1E2	-0.01	0.12	0.05	0.12	-0.02	0.08	0	0.14	0.04	0.05	0.1	0.06	0.15	0.15	0.05	0.09	0.04	0.05	0.02	0.04	0.16	0.13	0.06	0.04	0.03	0.1	0.02	-0.02	0.09	0.04	0.05	0.08	0.19	0.07	0.11	0.05	-0.01	-0.01	0.14	0.04	0	0.09	0.2	0.13	0.11	-0.05	0	0.05	0.09
ATP6V1F	0.07	0.06	0.05	0.02	-0.23	0.03	-0.25	0.09	0.1	-0.02	-0.12	-0.02	0.04	0.09	0.09	0.1	-0.08	0.05	0.1	-0.02	0.03	0.04	0.06	0.09	0.05	-0.01	0.03	0.11	0.01	-0.03	0.09	0.03	0.07	0.07	0.05	0.08	0.03	-0.06	0.12	0.05	0.03	0.01	0.06	0.05	0.07	0.01	0.13	0.02	-0.06
ATP6V1G1	0.05	0.08	-0.12	-0.06	-0.01	0.02	0.02	-0.03	-0.02	0	0.02	-0.08	-0.07	0.06	0.01	0.06	-0.1	-0.05	0.01	0.02	-0.08	0.04	-0.04	-0.03	-0.04	-0.02	0	0.02	-0.06	-0.1	0.04	-0.02	-0.06	-0.01	-0.04	0.02	0.02	0.03	0.08	0.03	-0.02	-0.01	-0.03	0.01	0	0.01	0.09	0.14	-0.03
ATP6V1G2	0.09	0.19	0.31	0.21	0.03	0.23	-0.17	0.29	0.23	0.09	-0.08	0.05	0.32	0.19	0.12	0.35	0.09	0.3	0.31	-0.11	0.2	0.36	0.35	0.2	0.16	0.3	0.26	0.09	0.08	0.22	0.19	0.27	0.17	0.29	0.22	0.18	-0.06	0.01	0.35	0.28	-0.07	0.13	0.32	0.16	0.17	-0.05	0.32	0.07	0
ATP6V1G3	-0.07	0.01	0.14	0.01	-0.01	0.06	-0.2	0.07	0.04	0.05	-0.04	0.01	0.09	0.05	0.04	0.11	0.02	0.05	0.09	-0.23	0.11	0.15	0.11	0.07	0.06	0.15	0.14	0.02	0.01	0.14	0.12	0.09	0.24	0.05	0.12	0.02	-0.08	0.07	0.04	0.11	-0.04	0.07	0.11	0.02	0.08	0.01	0.1	-0.08	0.03
ATP6V1H	-0.03	-0.02	-0.05	-0.14	-0.08	0	-0.05	-0.06	-0.02	-0.08	-0.04	0	-0.15	-0.09	-0.04	0	-0.08	-0.09	-0.03	-0.1	-0.02	-0.02	-0.1	-0.03	-0.04	-0.07	-0.04	-0.02	-0.04	-0.11	-0.02	-0.08	-0.01	-0.08	-0.08	0.01	0.01	0.01	-0.09	-0.12	-0.02	0.02	-0.13	-0.09	-0.07	0.02	0.05	-0.05	-0.1
ATP7A	-0.05	0.01	-0.03	-0.09	-0.01	-0.03	0	0.04	0.11	0.08	-0.05	-0.01	0	0.03	-0.01	0.05	-0.01	-0.03	0.09	-0.02	0.09	0.05	0.07	-0.01	-0.01	0.13	0.1	0.02	-0.05	-0.02	0.03	0.05	-0.09	0.03	0	0.04	0.02	0.06	0.06	0.03	-0.06	0.06	-0.01	0.05	0.02	-0.06	0.05	-0.12	-0.05
ATP7B	-0.05	-0.04	-0.04	-0.05	0.03	-0.03	0.13	-0.08	0	-0.05	0.03	-0.01	-0.06	0.05	-0.07	0	-0.09	-0.06	-0.02	0.18	-0.13	-0.04	0.02	0.01	-0.03	0.06	0	-0.17	0.05	-0.07	-0.04	0.04	0.11	-0.04	0.02	0.1	-0.03	0.01	0.1	-0.1	0	-0.04	0.04	0	-0.02	-0.12	0.01	-0.07	-0.12
ATP8A1	0.01	0.15	0.12	0.23	-0.04	0.21	-0.13	0.26	0.27	0.04	0.15	0.05	0.31	0.26	0.1	0.34	0.12	0.23	0.2	0.15	0.01	0.31	0.22	0.25	0.15	0.24	0.09	0.05	0.06	0.22	0.17	0.24	0.19	0.29	0.26	0.26	0.01	0.01	0.45	0.18	-0.02	0.08	0.32	0.18	0.26	-0.01	0.29	-0.01	0.04
ATP8A2	0.05	0.11	0.16	0.06	0.04	0.02	0	0.13	0.08	-0.03	0.03	0.01	0.03	0.03	0.04	0.14	0.07	0.01	0.05	0.08	-0.12	0.12	0.03	0.02	0	-0.03	0.03	0.04	0.02	0.03	0.05	0.04	-0.19	0.03	0.02	0.09	-0.07	-0.08	0.09	0.11	0	0	0.08	0.03	0.08	0.01	0.16	-0.05	-0.02
ATP8B1	-0.17	-0.16	-0.21	-0.28	0.08	-0.17	0.21	-0.23	-0.19	-0.01	0.12	0	-0.28	-0.39	-0.19	-0.37	-0.09	-0.31	-0.27	0.22	-0.15	-0.25	-0.29	-0.2	-0.08	-0.12	-0.2	-0.11	-0.19	-0.32	-0.22	-0.24	-0.1	-0.28	-0.25	-0.23	0.15	-0.1	-0.38	-0.25	0	-0.24	-0.42	-0.13	-0.19	-0.05	-0.29	-0.05	-0.05
ATP8B2	0.09	0.06	0.2	0.05	-0.06	0.04	-0.2	0.09	-0.03	0.02	-0.29	-0.04	0.07	0.07	0.09	0.07	0.05	0.05	0.18	-0.27	0.19	0.09	0.19	-0.01	-0.01	0.11	0.23	0.04	0.05	0.07	0.11	0.12	-0.1	0.08	0.04	0.02	-0.02	0.09	-0.02	0.16	-0.03	0.07	0.15	0.03	0.04	-0.04	0.13	0.03	0.01
ATP8B3	0.13	-0.03	-0.06	0.05	0	-0.02	-0.01	-0.03	-0.04	-0.02	-0.01	0.01	0.01	-0.04	-0.03	-0.07	-0.04	-0.03	-0.05	-0.02	-0.01	-0.09	-0.04	0.03	0.02	-0.08	-0.1	-0.09	0.05	0.04	-0.05	-0.01	-0.02	0	0.01	-0.06	0.03	0.01	-0.03	-0.08	-0.01	0.03	-0.02	0.02	0.02	0.04	-0.06	0.06	-0.01
ATP8B4	0.06	0.05	0.13	0.18	-0.05	0.1	-0.14	0.16	0.12	0.03	0.04	0.05	0.2	0.11	0.08	0.21	0.06	0.13	0.18	-0.03	-0.01	0.16	0.21	0.17	0.04	0.15	0.19	0.01	0.1	0.14	0.07	0.14	0.22	0.19	0.13	0.15	-0.01	-0.05	0.19	0.15	0	0.04	0.24	0.04	0.08	0.01	0.16	0.08	0.02
ATP8B5P	0.06	0.03	0.01	0.01	0	0.03	-0.01	-0.07	0.01	-0.03	0.02	-0.01	0.02	0.08	-0.08	0.03	-0.01	0	0.03	-0.03	-0.1	-0.05	0	-0.06	0	-0.04	-0.02	0	0.03	0.02	0.11	0.07	-0.01	-0.03	0.04	-0.03	-0.07	-0.05	0.03	0.07	-0.02	0	0.03	-0.09	-0.02	0.01	0.05	0.07	0
ATP9A	-0.07	-0.09	-0.24	-0.27	0.09	-0.13	0.27	-0.16	-0.17	-0.05	0.09	0.09	-0.23	-0.28	-0.15	-0.32	-0.1	-0.28	-0.26	0.16	-0.14	-0.23	-0.24	-0.16	-0.11	-0.15	-0.14	-0.12	-0.18	-0.31	-0.23	-0.23	-0.17	-0.19	-0.29	-0.13	0.02	-0.11	-0.31	-0.22	0.03	-0.2	-0.34	-0.11	-0.18	-0.05	-0.22	-0.06	-0.03
ATP9B	0.08	0.1	0.12	0.12	-0.07	0.12	-0.16	0.21	0.22	0.02	0	-0.02	0.16	0.02	0.07	0.18	0.08	0.14	0.17	0	0.06	0.2	0.17	0.16	0.1	0.11	0.08	0.06	0.14	0.12	0.11	0.15	-0.08	0.17	0.19	0.15	0.03	0.04	0.21	0.09	0.02	0.1	0.18	0.08	0.17	0.02	0.2	0.08	0.06
ATPAF1	-0.07	0.11	0.06	0.14	-0.04	0.11	-0.11	0.04	0.06	0.02	-0.01	0	0.16	0.16	0.07	0.17	-0.03	0.05	0.11	0.04	-0.03	0.1	0.2	0.13	0.03	0.17	0.12	0	0.11	0.08	0.1	0.17	0.04	0.14	0.19	0.14	0.04	-0.04	0.2	0.1	-0.01	0.08	0.22	0.16	0.15	-0.06	0.15	-0.09	-0.07
ATPAF2	-0.08	0.03	0.02	0.1	0	0.09	0.07	0.03	-0.08	-0.06	0.03	-0.01	0.11	0.13	0.07	0.04	-0.05	0.18	0.04	-0.01	0.07	0.07	0.02	0.1	0.01	-0.03	-0.02	-0.01	0.07	0.06	0.02	-0.01	0.16	0.08	0.05	0.03	-0.08	0.07	0.12	0.03	0.03	0.05	0.14	0.07	0.06	0.02	0	0.01	0.06
ATPIF1	-0.09	0.08	0.05	0.09	0.03	0.07	-0.03	0.06	0.06	-0.04	0.03	0	0.15	0.15	0.03	0.15	0.04	0.17	0.08	0.08	0.04	0.08	0.1	0.12	0.09	0.11	0.02	0.02	0.1	0.12	0.11	0.1	0.17	0.13	0.2	0.07	0.05	0.12	0.19	0.06	-0.03	0.12	0.23	0.11	0.13	0	0.15	-0.04	-0.05
ATR	-0.1	0.02	-0.02	0.13	0.02	0.03	-0.09	0.07	-0.04	-0.02	0.13	-0.04	0.1	0.14	0.08	0.1	0.1	0.17	0.05	0.01	0.04	0.02	0.01	0.05	0.09	-0.09	-0.05	0.15	0.04	0.15	0.13	0.05	0.16	0.09	0.1	0.04	-0.03	-0.07	0.14	0.03	0.02	0.12	0.12	0.06	0.01	0.01	0.03	-0.09	0.12
ATRAID	0.05	-0.05	-0.13	-0.1	-0.06	-0.09	0.04	-0.13	-0.1	-0.03	0.06	0.06	-0.15	-0.07	-0.03	-0.15	-0.08	-0.15	-0.14	0.11	0.02	-0.18	-0.18	-0.09	-0.07	-0.11	-0.07	-0.1	-0.08	-0.16	-0.08	-0.12	-0.11	-0.15	-0.15	-0.07	0.09	0.04	-0.17	-0.16	-0.03	-0.11	-0.13	-0.02	-0.08	-0.04	-0.14	0.14	-0.05
ATRIP	0.09	0.06	0.16	0.22	-0.07	0.12	-0.24	0.09	0.04	0	-0.07	-0.01	0.19	0.22	0.1	0.2	0.07	0.24	0.17	-0.15	0.11	0.18	0.18	0.13	0.09	0.15	0.1	0.08	0.18	0.24	0.2	0.14	0.16	0.18	0.16	0.12	-0.03	-0.07	0.22	0.21	0	0.14	0.26	0.04	0.1	0.03	0.19	0.08	0.07
ATRN	-0.04	-0.09	-0.19	-0.18	-0.04	-0.14	0.07	-0.1	-0.12	-0.04	0.04	0.03	-0.2	-0.12	-0.03	-0.16	-0.07	-0.21	-0.06	-0.03	-0.03	-0.12	-0.12	-0.09	-0.1	-0.13	-0.04	0.02	-0.09	-0.17	-0.1	-0.14	-0.19	-0.14	-0.19	-0.12	-0.03	-0.04	-0.25	-0.14	-0.01	-0.09	-0.22	-0.07	-0.08	-0.05	-0.18	-0.05	-0.08
ATRNL1	0.16	0.05	0.08	0.03	-0.07	0.01	-0.12	0.12	0.17	0.01	-0.09	-0.05	0.02	0.03	0.03	0.06	-0.06	-0.01	0.11	-0.08	-0.13	0.07	0.09	0.04	0.07	0.01	0.08	0.06	-0.03	0.02	0.04	0.07	0.02	0.02	0.04	0.08	-0.13	0.06	0.08	0.13	-0.02	0	0.08	-0.01	0.07	-0.05	0.16	0.04	-0.08
ATRX	-0.16	0.05	0.1	0.11	0.08	0.01	0.05	0.13	0.08	0.04	-0.02	0.03	0.09	0.05	0.03	0.07	-0.01	0.1	0.1	-0.03	0.09	0.08	0.1	0.06	0.04	0.11	0.06	0.07	0.03	0.01	0.06	0.07	0.13	0.07	0.05	0.05	-0.07	0.04	0.17	0.08	0	0.08	0.1	0.13	0.02	-0.07	0.03	-0.13	-0.03
ATXN1	0.02	-0.06	-0.04	-0.22	0.02	-0.12	0.07	-0.1	-0.1	0	-0.07	0.03	-0.16	-0.16	-0.03	-0.15	-0.05	-0.17	-0.02	-0.07	0.04	-0.03	-0.12	-0.13	-0.04	-0.06	0.03	0.03	-0.12	-0.14	-0.1	-0.16	0.02	-0.16	-0.15	-0.13	0.02	-0.09	-0.21	-0.08	-0.05	-0.07	-0.23	-0.08	-0.07	0.03	-0.17	-0.06	-0.07
ATXN10	0.1	0.01	0.13	0.08	-0.01	0.13	-0.12	0.09	0.12	0.06	0.02	-0.03	0.11	0.01	0.16	0.07	-0.08	0.05	0.11	-0.08	0.11	0.13	0.11	0.1	-0.02	0.01	0.05	0.15	0	0.09	0.1	0.09	0.09	0.09	0.07	0.05	-0.02	0.02	-0.01	0.04	0.04	0.1	0.1	0.08	0.01	-0.08	0.05	0.08	0.05
ATXN1L	0.11	-0.01	-0.05	-0.06	0.1	-0.02	0.04	-0.11	-0.05	0.02	0.11	0	0.01	0.01	-0.03	-0.07	-0.02	-0.02	-0.03	-0.03	0.05	-0.01	-0.04	-0.03	-0.03	-0.01	-0.02	0.01	0	0.03	-0.03	-0.06	-0.08	0	-0.04	-0.03	-0.07	0.13	-0.06	-0.1	0.04	-0.03	-0.03	-0.07	0.02	0.04	-0.07	0.16	0.04
ATXN2	-0.07	-0.05	0.09	0	0.03	-0.03	0.11	-0.13	-0.07	0.02	0.02	0	0.04	-0.06	-0.02	0.02	-0.04	-0.11	-0.04	-0.01	-0.06	0.01	0.04	0.02	0	-0.02	0.02	-0.01	-0.03	-0.03	-0.01	0.02	0.02	-0.02	0	-0.01	0.02	0.02	0.04	-0.06	-0.02	-0.06	-0.01	0.03	0.01	-0.06	-0.01	-0.11	0.02
ATXN2L	-0.06	0.12	0.18	0.25	-0.02	0.24	-0.2	0.17	0.15	0.03	0.04	0.02	0.27	0.25	0.14	0.33	0.03	0.28	0.21	-0.11	0.04	0.26	0.26	0.23	0.15	0.16	0.17	0.04	0.16	0.32	0.2	0.19	0.29	0.25	0.26	0.2	-0.02	0.01	0.3	0.14	0.01	0.18	0.31	0.14	0.22	0.02	0.26	-0.08	0.09
ATXN3	-0.02	0.13	0.21	0.27	0.06	0.19	-0.07	0.21	0.17	0.08	0.14	0.07	0.34	0.23	0.16	0.31	0.14	0.25	0.22	-0.04	0.26	0.24	0.29	0.17	0.03	0.22	0.17	0.08	0.13	0.31	0.12	0.24	-0.05	0.31	0.25	0.15	-0.04	-0.04	0.3	0.23	-0.08	0.17	0.31	0.12	0.16	0.03	0.22	-0.18	0.22
ATXN3L	0.07	0.04	0.12	0.09	-0.01	0.1	-0.06	0.06	0.03	0	-0.01	-0.01	0.13	0.04	0.02	0.09	0.01	0.19	0.09	-0.1	0.1	0.1	0.06	0.06	0.08	0	0.04	0.04	0.05	0.08	0.08	0.1	0.19	0.08	0.09	0.06	0.01	0	0.09	0.1	0.01	0.09	0.15	0.02	0	0.02	0.09	0.06	0.07
ATXN7	-0.08	0.08	0.13	0.16	-0.05	0.16	-0.14	0.12	0.08	-0.03	0.07	0.03	0.16	0.22	0.09	0.23	0.09	0.19	0.2	-0.12	0.19	0.19	0.16	0.17	0.13	0.1	0.14	0.1	0.12	0.23	0.12	0.16	0.26	0.19	0.2	0.21	0	-0.05	0.23	0.11	-0.04	0.11	0.19	0.04	0.1	0.14	0.21	-0.17	0.11
ATXN7L1	0.09	0.04	0	0.09	-0.05	0.07	-0.05	0.11	0.12	0.06	-0.04	-0.01	0.11	0.05	0.04	0.09	0.02	0.07	0.12	0.04	0.04	0.07	0.11	0.1	0.03	0.09	0.03	-0.06	0.04	0.04	0.01	0.08	0.17	0.15	0	0.09	0.07	0.02	0.14	0.09	0	0	0.08	-0.06	0.04	0.01	0.12	0.05	0.01
ATXN7L2	0.04	0.14	0.21	0.31	-0.1	0.2	-0.24	0.12	0.14	0.04	-0.03	0.03	0.31	0.24	0.18	0.24	0	0.28	0.23	0	-0.01	0.13	0.28	0.22	0.06	0.13	0.17	0.1	0.14	0.25	0.16	0.2	0.22	0.27	0.24	0.13	-0.09	0.03	0.27	0.24	0.02	0.14	0.34	0.13	0.15	-0.01	0.23	0.02	0.11
ATXN7L3	0.08	0.1	0.11	0.22	0	0.13	-0.1	0.11	0.07	0.07	0.15	0.01	0.24	0.2	0.07	0.3	0.04	0.27	0.09	0.03	-0.04	0.25	0.19	0.23	0.1	0.11	0.12	0.03	0.09	0.22	0.16	0.1	0.17	0.23	0.19	0.11	-0.1	-0.02	0.33	0.13	-0.01	0.05	0.24	0.08	0.16	0	0.15	0.02	0.11
ATXN7L3B	-0.02	0.08	0.13	0.21	0.09	0.13	0.01	0.14	0.21	0.03	0.14	-0.02	0.24	0.21	0.04	0.27	0.02	0.19	0.09	0.2	-0.12	0.23	0.2	0.18	0.14	0.19	0.08	-0.02	0.11	0.16	0.13	0.15	0.15	0.25	0.19	0.21	-0.02	0.04	0.44	0.15	0	0.04	0.29	0.08	0.15	-0.04	0.2	0.01	0.03
ATXN8OS	0.04	0.07	0.09	0.1	0.02	0.07	0.01	0.1	0.06	0.08	0	-0.02	0.11	0.15	0.06	0.12	0.03	0.13	0.05	0.01	0.01	0.11	0.07	0.09	0.1	0.07	0	0.02	0.04	0.09	0.07	0.13	-0.03	0.05	0.12	0.02	-0.09	-0.08	0.11	0.13	0.04	0.08	0.09	0.05	0.06	0.02	0.05	0.06	0.03
AUH	-0.04	-0.04	-0.09	-0.02	0.02	-0.08	0.16	-0.1	-0.07	-0.06	0.08	0.04	-0.04	-0.06	-0.06	-0.04	-0.1	-0.01	-0.06	0.09	-0.01	-0.06	-0.09	0.04	0.02	-0.06	-0.05	-0.11	-0.03	-0.02	-0.03	-0.01	0.04	-0.04	0.02	-0.01	-0.01	-0.13	0.06	-0.06	-0.02	-0.05	0.03	0.03	-0.01	-0.03	-0.02	-0.03	-0.07
AUNIP	0.05	0.1	-0.02	0.24	-0.02	0.11	0	0.04	0	0.01	0.12	0	0.19	0.32	0.08	0.17	0.05	0.21	0.07	0.07	0	0.05	0.12	0.15	-0.01	0.1	0	-0.01	0.19	0.2	0.09	0.14	0.2	0.15	0.23	0.12	0.06	-0.01	0.24	0.1	0.03	0.07	0.3	0.12	0.14	0.12	0.08	0.01	0.03
AUP1	0.05	0.02	-0.12	0.08	-0.09	0.01	-0.1	-0.11	-0.08	0.01	0.12	0.01	0	0.19	-0.02	0.06	-0.01	0.11	-0.04	0.05	-0.08	-0.06	-0.06	0.07	0.03	-0.08	-0.04	-0.05	0.08	0.04	0.07	-0.05	0.12	0.05	0.02	0.02	-0.05	0.07	0.09	-0.01	0.08	0.04	0.1	-0.04	0.04	0.02	0.01	0.16	0.02
AURKA	-0.09	-0.09	-0.11	-0.07	0	-0.07	0.11	-0.14	-0.22	-0.05	-0.07	0.01	-0.19	-0.05	-0.07	-0.22	-0.06	-0.07	-0.18	-0.07	-0.05	-0.27	-0.19	-0.19	-0.07	-0.21	-0.13	-0.03	-0.01	-0.08	-0.09	-0.15	0.02	-0.25	-0.08	-0.12	-0.03	-0.09	-0.13	-0.1	0.01	-0.04	-0.13	-0.07	-0.14	0	-0.21	-0.04	-0.07
AURKAIP1	-0.03	-0.02	-0.04	-0.02	-0.04	-0.05	0	-0.13	-0.15	-0.03	-0.14	-0.05	-0.08	0.08	0	-0.05	-0.12	-0.01	-0.11	-0.03	0.01	-0.07	-0.09	-0.09	-0.08	-0.04	-0.04	0.01	0.03	-0.04	-0.01	-0.1	0.09	-0.11	0.01	-0.08	0.06	-0.03	-0.05	-0.07	0.01	0.01	-0.03	0.03	-0.01	-0.01	-0.08	0	-0.11
AURKB	-0.04	0.04	0.09	0.25	0.01	0.12	0.02	0.03	-0.01	-0.02	-0.04	-0.02	0.19	0.19	0.06	0.12	-0.03	0.23	0.12	-0.11	0.05	0.04	0.15	0.1	0.03	0.05	0.05	0.05	0.15	0.21	0.1	0.08	0.16	0.11	0.16	0.06	-0.1	-0.07	0.16	0.15	0.02	0.06	0.28	0.1	0.03	0.04	0.08	-0.07	0.14
AURKC	0.06	0.04	0.06	0.06	0.03	0.09	-0.14	0.06	0.08	0.05	-0.03	0.05	0.12	0.11	0.03	0.08	0.02	0.09	0.09	-0.1	-0.06	0.05	0.16	0.03	0.06	0.08	0.05	0.03	0.05	0.11	0.08	0.12	-0.1	0.05	0.1	0.04	-0.01	0.09	0.06	0.08	-0.04	0.1	0.12	0.07	0.02	0.02	0.05	-0.03	0.02
AUTS2	-0.06	0.1	0.12	0.12	-0.03	0.12	-0.22	0.2	0.15	0.07	0.03	0.05	0.22	0.11	0.09	0.15	0.04	0.16	0.22	0.01	0.11	0.24	0.22	0.14	0.03	0.2	0.17	0.12	-0.02	0.12	0.08	0.2	0.02	0.2	0.17	0.15	-0.03	-0.04	0.21	0.22	-0.02	0.09	0.22	0.15	0.16	-0.15	0.26	-0.08	0.06
AVEN	0.11	-0.02	0.03	0.02	-0.04	-0.01	-0.11	-0.02	-0.09	-0.03	-0.14	-0.02	-0.01	-0.05	0.04	-0.08	-0.03	0.04	0.06	-0.16	0.1	-0.02	0.05	-0.05	0.02	0.07	0.16	0.05	-0.02	0.09	0.07	-0.02	-0.05	-0.07	0.02	-0.06	-0.07	-0.04	-0.15	0.04	-0.07	0.03	-0.01	-0.04	-0.04	-0.01	0.02	0.09	0.01
AVIL	-0.06	0.12	0.13	0.03	0.1	0.13	-0.04	0.1	0.13	0.09	0.08	0.05	0.15	0.12	0.04	0.14	0.06	0.14	0.05	0.01	0.03	0.22	0.13	0.1	0.06	0.25	0.07	0.04	0.02	0.03	0.09	0.14	-0.02	0.13	0.09	0.08	0.05	0.13	0.17	0.1	0.01	0.08	0.1	0.07	0.13	0.04	0.16	0.03	0.01
AVL9	-0.1	0.01	-0.05	-0.02	-0.05	-0.04	-0.09	-0.09	-0.07	-0.02	0.05	0.02	-0.02	0.09	0.01	-0.02	-0.05	0.03	-0.03	0.01	0.08	-0.08	-0.07	0.05	-0.01	-0.03	-0.05	0.03	0.02	0.03	0.02	-0.08	-0.06	-0.03	0	0.02	0.06	0.02	0.02	-0.11	-0.01	0.01	0.01	-0.01	-0.02	0.03	-0.02	-0.02	0.01
AVP	0.03	0.02	-0.06	0.04	-0.02	0.07	-0.06	-0.11	-0.07	0.01	0.14	0.05	0.02	-0.01	0.01	0.01	-0.09	0.04	-0.05	0.08	-0.07	-0.07	-0.05	0.01	0.03	-0.1	-0.05	0.03	0.03	0.04	0.1	0.02	-0.06	-0.03	0.03	-0.03	-0.03	0.08	-0.02	-0.03	0.04	0	0.03	-0.02	0	0.05	-0.03	0.1	0.01
AVPI1	-0.03	-0.15	-0.4	-0.28	-0.02	-0.27	0.15	-0.31	-0.32	-0.04	0.03	0	-0.36	-0.27	-0.14	-0.38	-0.11	-0.37	-0.36	0.09	-0.15	-0.38	-0.4	-0.26	-0.19	-0.35	-0.23	-0.1	-0.13	-0.28	-0.22	-0.34	-0.14	-0.36	-0.32	-0.22	0.06	0.03	-0.44	-0.25	0.05	-0.16	-0.42	-0.18	-0.24	0.02	-0.39	0.1	-0.05
AVPR1A	0.04	0.08	0.13	0.1	0.03	0.14	0.02	0.15	0.09	0	0.02	0.06	0.1	0.14	0.07	0.14	0.06	0.14	0.05	-0.16	0.02	0.1	0.11	0.08	0.09	0.09	0.05	0.06	0.05	0.11	0.12	0.11	-0.1	0.07	0.12	0.1	-0.01	0.03	0.14	0.1	0.08	0.12	0.11	0.03	0.06	0.09	0.14	0.04	0.09
AVPR1B	0.1	0.06	-0.02	0	-0.05	0.01	-0.15	0.02	-0.01	0.03	0	-0.05	0.02	0.07	0.02	0.04	0.05	0.06	0	0	-0.13	0.02	0.01	0	-0.01	-0.03	-0.02	0.02	-0.02	0.01	0.04	0.04	-0.03	0.01	0	-0.06	0.01	0.04	0.01	0.08	0.02	0.07	0.04	-0.04	0.02	0.04	0.05	0.06	-0.03
AVPR2	0.04	0.03	0.02	0.08	-0.04	0.07	-0.05	0.06	0.02	0.01	0.04	-0.03	0.07	0.09	-0.02	0.05	0.01	0.12	0.01	-0.05	-0.12	0.03	0.03	0.03	0.02	0.01	-0.03	0.04	0.04	0.09	0.08	0.06	0.15	0.06	0.11	0.03	0.08	0	0.11	0.06	0.05	0.04	0.1	-0.02	0.02	0.05	0.05	0.12	0
AWAT1	0.05	0.07	0.12	0.09	0.04	0.08	-0.07	0.15	0.02	0.02	0.01	-0.01	0.11	0.07	0.04	0.12	0.05	0.07	0.06	-0.07	0.01	0.1	0.09	0.09	0.12	0.08	0	0.04	0.06	0.09	0.08	0.1	0.07	0.07	0.09	-0.01	0.11	0	0.16	0.12	-0.02	0.11	0.12	0.04	0.1	0.03	0.03	-0.05	0.03
AXDND1	-0.14	0.09	0.09	0.14	-0.01	0.1	-0.16	0.06	0.14	-0.05	0.06	-0.01	0.15	0.16	-0.03	0.18	0.11	0.21	0.1	0	0.02	0.13	0.09	0.08	0.01	0.11	0.07	0.06	0.13	0.15	0.07	0.12	-0.06	0.11	0.17	0.1	0.05	-0.05	0.21	0.04	-0.02	0.08	0.19	0.05	0.13	-0.02	0.14	-0.02	0.1
AXIN1	-0.02	0.03	-0.02	0.14	-0.07	0.11	-0.09	0	0.04	0.03	0.18	0.05	0.13	0.15	0.05	0.15	-0.11	0.07	0.01	0.1	-0.07	0.05	0.01	0.14	0.07	-0.05	-0.06	-0.06	0.08	0.14	0.05	0.06	0.09	0.07	0.12	0.08	0.07	-0.01	0.16	-0.02	0.03	0.07	0.16	0.05	0.09	-0.02	0.05	0.03	0.06
AXIN2	0.08	0.08	0.02	0.09	0.03	0.08	-0.01	0.04	0.11	0.04	0.01	0	0.14	0.09	-0.03	0.09	0.06	0.1	0.08	0.09	-0.02	0.09	0.11	0.15	0.04	0.1	0.07	-0.01	0.08	0.04	0.1	0.16	0.26	0.14	0.15	0.13	0.02	0.08	0.21	0.12	-0.02	-0.02	0.17	0.07	0.12	-0.03	0.18	-0.01	0.03
AXL	0.03	-0.17	-0.05	-0.25	0.02	-0.21	0.1	-0.24	-0.25	-0.03	-0.19	-0.02	-0.28	-0.45	-0.12	-0.38	-0.05	-0.31	-0.16	-0.27	0.09	-0.33	-0.23	-0.3	-0.11	-0.21	-0.1	-0.02	-0.15	-0.16	-0.2	-0.26	-0.28	-0.33	-0.32	-0.26	0.02	0.03	-0.51	-0.17	0.03	-0.17	-0.38	-0.21	-0.24	0.03	-0.36	0.04	-0.02
AZGP1	-0.07	0.01	-0.12	-0.09	-0.06	-0.02	0	-0.09	-0.04	-0.11	0.03	-0.03	-0.09	-0.04	-0.1	0.02	-0.02	-0.02	-0.1	0.17	-0.18	-0.04	-0.13	-0.05	-0.02	-0.08	-0.09	-0.06	-0.06	-0.12	-0.02	-0.06	0	-0.06	-0.07	0.03	0.04	0.02	0.04	-0.03	0.03	-0.04	-0.08	-0.05	0	0.02	0.04	0	-0.1
AZGP1P1	0.05	0.01	0.01	-0.07	0.03	0.01	0	-0.1	-0.05	0	-0.07	-0.04	-0.01	-0.06	-0.06	0.02	0.01	0.06	0.06	-0.11	-0.01	0.05	0.01	-0.02	-0.01	0.08	0.04	0.04	-0.04	0.02	-0.01	0.02	-0.2	-0.02	0.01	0.04	0.02	-0.09	0	0.06	0.02	0.05	0.03	-0.06	0.02	-0.01	0.08	-0.04	0.01
AZI1	0.03	0.12	0.04	0.13	-0.03	0.08	-0.11	0.15	0.09	0.08	0.07	0.01	0.16	0.15	0.01	0.13	0.04	0.15	0.08	0.02	0.06	0.14	0.14	0.08	-0.02	0.11	0.06	0.03	0.06	0.1	0.02	0.06	-0.04	0.23	0.04	0.11	0	-0.05	0.29	0.07	0	0.06	0.16	0.02	0.08	-0.02	0.18	-0.03	0.03
AZI2	0	0	0.07	0.09	0.08	0	0.08	-0.04	-0.02	-0.02	-0.2	-0.01	0.01	0.02	0	0.04	0.08	0.04	0.11	-0.17	0.14	-0.02	0.15	-0.02	0.08	0.12	0.18	-0.03	0.09	0.02	0.01	0.09	-0.24	0	0.07	0.02	0.02	0.05	-0.07	0.09	-0.03	0.04	0.12	0.05	0	0.04	0.05	-0.03	0.01
AZIN1	-0.06	0.07	-0.02	0.1	-0.02	0.07	-0.03	0.05	0.07	0.01	0.15	0	0.08	0.1	0.03	0.1	0.01	0.09	0.01	0.1	0	0.06	0.06	0.11	0.08	0	-0.03	-0.01	0.1	0.1	0.07	0.04	0.08	0.15	0.12	0.08	-0.06	-0.07	0.1	0.06	-0.07	0.04	0.11	0.04	0.1	0.03	0.06	-0.11	0.05
AZU1	0.07	0.04	0.06	0.02	-0.05	0.04	-0.17	0.1	0.02	0.05	0.05	0.07	0.08	0.04	0.06	0.11	-0.02	0.06	0.03	-0.03	0.03	0.12	0.07	0.08	0	0.06	0.05	-0.04	0.09	0.08	0.04	0.06	-0.04	0.08	0.11	0.07	-0.04	0.11	0.03	0.04	0	0.07	0.1	0.03	0.09	0.01	0.07	-0.08	-0.03
B2M	0.04	0.01	0.09	0.06	-0.03	0.03	-0.21	0.09	0.06	-0.01	-0.02	0.01	0.06	-0.01	0.05	0.05	0.04	0.06	0.08	-0.19	0.07	0.09	0.04	0.07	0.06	0.1	0.09	0.13	-0.04	0.19	0.05	0	-0.03	0.02	0.07	0.02	0.05	0.04	-0.03	0.02	-0.12	0.09	0	-0.04	0.03	0.08	0.06	0.08	0.09
B3GALNT1	-0.05	-0.03	-0.11	-0.17	0.09	-0.13	0.07	-0.12	-0.11	0.01	-0.03	0.03	-0.16	-0.17	-0.06	-0.17	0.04	-0.09	-0.15	0.06	-0.04	-0.13	-0.13	-0.13	-0.04	-0.05	-0.1	0	-0.12	-0.18	-0.09	-0.12	-0.09	-0.13	-0.19	-0.16	0.02	-0.08	-0.14	-0.15	-0.01	-0.1	-0.27	-0.07	-0.12	0	-0.1	-0.09	-0.07
B3GALNT2	0.02	0.07	-0.12	0.19	0.03	0.03	0.06	0	-0.04	0.07	0.14	0.02	0.14	0.08	0.05	0.02	0.02	-0.03	-0.01	0.19	0.02	0.06	0.07	0.1	0.04	-0.03	-0.04	-0.04	0.1	0.06	0.04	0.06	0.18	0.07	0.11	-0.02	0.06	0.06	0.07	0.04	0	0.01	0.17	0.08	0.05	0.06	-0.09	0.05	0.15
B3GALT1	0.03	0.01	0.02	-0.06	0.02	0.06	0.06	0.02	0.03	-0.02	-0.03	-0.09	-0.05	0.1	-0.07	0.06	-0.01	0.1	0.01	0	-0.08	-0.02	-0.05	-0.09	0.01	-0.05	-0.03	0	0.07	-0.01	0.06	0.02	-0.1	-0.02	-0.01	0.07	0.01	0.06	0.05	0.04	0.02	0.06	0	-0.04	0.01	-0.02	0.07	-0.01	-0.05
B3GALT2	0.09	0.04	0.05	0.02	0	0.06	-0.08	0	0.08	-0.01	-0.1	0	0.03	0.03	0.02	0.08	-0.02	0.01	0.07	0	-0.08	0.13	0.08	0.04	-0.02	0.05	0.15	0.06	0	-0.02	0.03	0.05	-0.06	0.07	0.01	0.15	-0.09	-0.01	0.06	0.14	0.05	0.02	0.05	0.04	0.01	-0.12	0.18	0.01	0.03
B3GALT4	-0.1	0	-0.07	0.05	0.04	0.06	0.02	0.04	-0.02	-0.01	0.28	0.06	0.04	0.04	-0.01	0.07	0.08	0.07	-0.08	0.15	-0.12	0	-0.1	0.05	0.05	-0.09	-0.14	0	-0.04	0.04	0	0.01	0.02	0.02	0.04	-0.01	0.05	-0.03	0.03	0.03	-0.04	0.02	-0.03	-0.01	0.01	0.13	0.07	0.02	0.1
B3GALT5	0.03	-0.04	0.03	-0.04	0	-0.08	-0.01	0.03	0.02	-0.05	-0.03	-0.04	-0.06	-0.15	-0.04	-0.05	0.06	-0.02	-0.02	-0.01	-0.19	-0.03	-0.07	-0.02	0.02	-0.01	-0.03	-0.04	-0.02	0	-0.05	-0.06	-0.16	-0.05	-0.11	-0.02	0.02	-0.06	0.01	-0.1	0.02	-0.04	-0.08	-0.06	-0.08	0.02	0	0.02	-0.05
B3GALT6	0.05	0.07	0.02	0.03	-0.04	0.03	0.06	-0.03	-0.02	-0.05	-0.15	0	-0.01	0.07	0.02	0.02	-0.04	0.06	0.03	0	0.06	0.02	0.08	0.02	-0.05	0.07	0.11	0.04	0.01	-0.01	-0.01	0	0.08	0.04	0.02	0.05	0.01	0.07	-0.04	-0.01	-0.02	0.01	0.02	0.06	0.06	-0.02	0.07	-0.02	-0.04
B3GALTL	0.02	-0.09	-0.02	-0.11	0.06	-0.07	0.1	-0.07	-0.01	0.03	-0.15	-0.04	-0.22	-0.13	-0.04	-0.14	0.01	-0.17	0.02	-0.13	0.05	-0.11	-0.06	-0.14	-0.13	-0.14	-0.01	0	-0.04	-0.09	-0.07	-0.12	-0.08	-0.12	-0.13	-0.02	-0.03	0.09	-0.24	-0.05	-0.01	-0.05	-0.18	-0.08	-0.12	0.03	-0.07	-0.02	-0.02
B3GAT1	0	0.09	0.04	0.05	-0.07	0.01	-0.13	0.09	0.07	-0.03	-0.04	-0.02	0.06	0.18	0.05	0.12	-0.05	0.02	0.03	0.06	-0.1	0.07	0.06	0.06	0	0	0.03	0.01	0.03	-0.02	0.06	0.05	0.04	0.02	0.09	0.06	-0.04	-0.01	0.22	0.07	0.03	0.06	0.12	0.1	0.06	-0.09	0.14	0	-0.07
B3GAT3	0	0.03	0.04	0.01	-0.08	0.06	-0.14	0.03	-0.02	-0.05	-0.16	-0.01	0.02	0.05	0.05	0.08	-0.01	0.04	0.05	-0.16	0.07	0.05	0.07	0.05	0.07	0.01	0.1	-0.02	0.03	-0.01	0.02	0.06	0.14	0.04	0.07	0.07	-0.07	-0.05	0.02	0.02	0	0.01	0.07	0.06	0.1	-0.04	0.14	-0.06	-0.09
B3GNT1	-0.05	-0.09	-0.04	-0.16	0.03	-0.11	0.09	0.01	-0.08	0.01	-0.22	0.03	-0.18	-0.2	-0.04	-0.22	-0.05	-0.17	-0.05	-0.07	-0.02	-0.08	-0.05	-0.12	-0.05	-0.03	0.04	-0.03	-0.1	-0.21	-0.11	-0.1	-0.07	-0.15	-0.14	-0.07	-0.02	-0.03	-0.25	-0.07	0.01	-0.11	-0.19	-0.01	-0.1	-0.12	-0.06	-0.06	-0.12
B3GNT2	-0.12	0.05	-0.02	0.1	-0.04	0.1	-0.02	0.08	0.13	-0.03	0.19	-0.03	0.12	0.19	0	0.18	0.01	0.1	0.04	0.1	0	0.09	0.04	0.16	0.08	0.1	-0.04	-0.02	0.06	0.15	0.04	0.09	0.22	0.13	0.16	0.17	0.06	-0.04	0.26	0.01	-0.09	0.05	0.09	0.02	0.1	0.08	0.11	-0.15	0.05
B3GNT3	-0.03	-0.09	-0.25	-0.1	0.01	-0.06	0.17	-0.17	-0.14	-0.05	0.32	0	-0.14	-0.08	-0.09	-0.18	-0.12	-0.09	-0.31	0.3	-0.19	-0.23	-0.34	-0.03	-0.04	-0.23	-0.32	-0.12	-0.11	-0.12	-0.13	-0.19	0.03	-0.15	-0.13	-0.15	0.04	0.06	-0.11	-0.21	0.05	-0.12	-0.25	-0.07	-0.08	0.07	-0.24	0.1	0.01
B3GNT4	0.1	-0.05	-0.06	-0.04	-0.02	-0.05	-0.07	-0.07	-0.1	0.02	0.17	-0.01	0	0.05	-0.07	-0.06	-0.02	0	-0.14	0.07	-0.09	-0.08	-0.16	-0.05	0.03	-0.1	-0.18	-0.03	0.04	-0.07	-0.02	-0.08	-0.12	-0.06	-0.04	-0.15	-0.05	0.07	0.03	-0.05	0.04	-0.05	-0.03	-0.09	-0.02	0.04	-0.13	0.14	-0.01
B3GNT5	-0.13	-0.09	-0.25	-0.04	-0.01	-0.13	0.17	-0.05	-0.05	-0.01	0.16	0	-0.1	-0.09	-0.1	-0.17	0.01	-0.07	-0.22	0.21	-0.11	-0.19	-0.2	-0.06	-0.08	-0.19	-0.22	-0.15	-0.13	-0.16	-0.21	-0.14	-0.04	-0.08	-0.16	-0.18	-0.02	0	-0.1	-0.15	0.06	-0.1	-0.17	-0.04	-0.14	0.02	-0.25	0.01	0.03
B3GNT6	0.12	0.06	0.07	0.13	-0.09	0.12	-0.11	0.07	0.01	-0.02	0.05	-0.02	0.14	0.19	0.04	0.08	-0.04	0.26	0.08	-0.15	0.04	0.09	0.11	0.1	0.07	0.11	0.06	0.08	0.08	0.15	0.12	0.09	0.09	0.09	0.09	0.01	0.04	-0.08	0.14	0.07	0	0.16	0.12	0.01	0.1	0.06	0.14	0.02	0.06
B3GNT7	-0.09	-0.01	-0.09	-0.04	-0.04	0.04	-0.01	-0.08	0	-0.04	0.12	-0.06	-0.06	0.04	-0.03	-0.03	0.06	-0.01	-0.15	0.13	-0.09	-0.05	-0.21	-0.04	-0.05	-0.16	-0.17	0.03	-0.05	-0.01	-0.02	-0.05	0	-0.05	-0.09	-0.08	-0.04	-0.08	-0.01	-0.04	0	-0.01	-0.11	-0.06	-0.05	0.09	-0.1	-0.01	0.05
B3GNT8	0.12	0.06	-0.01	0.04	-0.04	0.03	-0.09	0	0.07	0.05	0.15	0.09	0.09	0.02	0.07	0.07	-0.06	0.02	0.04	0.16	-0.13	0.05	0.09	0.1	0.05	-0.01	0.04	-0.05	0.01	0.01	0.02	0.04	0.12	0.06	0.05	0.1	0.04	-0.04	0.05	-0.02	0.04	0.02	0.04	-0.04	0.05	0	0.08	0.09	-0.02
B3GNT9	0.05	-0.09	-0.08	-0.2	0.09	-0.18	0.13	-0.15	-0.14	0.01	-0.09	-0.01	-0.15	-0.29	-0.08	-0.28	-0.05	-0.17	-0.08	-0.04	0.03	-0.21	-0.11	-0.2	-0.13	-0.09	0	0.04	-0.15	-0.14	-0.11	-0.14	-0.26	-0.16	-0.19	-0.21	0.06	0.05	-0.36	-0.11	-0.03	-0.07	-0.26	-0.12	-0.17	-0.02	-0.18	0.07	0.01
B3GNTL1	0.03	-0.06	0.07	0.08	0.01	0.02	-0.04	0.04	-0.03	0.01	-0.1	0.02	0.05	-0.03	-0.04	0	0.09	0.04	0.03	-0.17	0.12	-0.02	0.07	0.07	0.04	0	0.02	-0.1	0.08	0.1	-0.03	-0.02	0.11	0.05	0.01	-0.02	0.04	-0.04	0	-0.01	0.05	0.05	0.07	-0.04	0.01	0.09	-0.03	-0.16	0.04
B4GALNT1	0.05	-0.02	-0.09	0.02	0.02	-0.14	0	-0.04	-0.07	-0.01	-0.11	0.01	-0.04	-0.03	0.01	-0.17	-0.07	-0.06	0	-0.17	-0.04	-0.1	0.01	-0.08	-0.01	-0.06	0.04	0.03	-0.01	-0.04	-0.02	-0.04	-0.14	-0.09	-0.03	-0.11	0	0.05	-0.13	-0.01	0	-0.02	0	0	-0.04	-0.09	-0.1	0.07	0.04
B4GALNT2	0.09	0.06	0.07	0.12	-0.01	0.06	-0.05	0.1	0.08	0.07	0.1	0.01	0.11	0.08	0.05	0.13	0.1	0.16	0.05	-0.06	0.06	0.1	0.05	0.07	0.08	-0.07	-0.04	0.01	0.15	0.12	0.08	0.1	-0.02	0.12	0.14	0.06	-0.01	0.08	0.15	0.08	0.02	0.06	0.13	0.04	0.12	0.04	0.07	0.11	0.09
B4GALNT3	0.07	-0.02	-0.09	-0.02	0.01	0.03	0.14	-0.04	-0.03	-0.05	0.12	-0.04	-0.03	0.07	-0.04	-0.01	-0.05	0.01	-0.14	0.16	-0.19	-0.09	-0.13	0	0.07	-0.14	-0.16	-0.12	-0.01	-0.07	0.01	-0.01	0.14	-0.05	0	-0.01	0.02	0.01	0.07	-0.04	0.09	-0.01	-0.01	-0.06	0.02	0.06	-0.02	0.1	-0.01
B4GALNT4	0.09	-0.02	-0.02	0.01	-0.03	-0.01	0.03	-0.02	-0.08	0.02	0.01	0	0.04	-0.04	-0.01	-0.08	-0.08	-0.06	-0.06	0.08	-0.15	-0.02	-0.02	0	-0.03	-0.01	-0.03	-0.01	-0.07	-0.11	0	-0.01	0.18	0	-0.04	-0.07	-0.06	0.02	-0.03	-0.02	0.05	-0.04	0.01	0.04	-0.01	-0.1	-0.04	0	-0.04
B4GALT1	-0.06	-0.07	-0.13	-0.14	0.05	-0.08	0.15	-0.12	-0.14	0.01	0.09	0.02	-0.14	-0.11	-0.06	-0.2	-0.01	-0.17	-0.18	-0.04	-0.01	-0.13	-0.23	-0.15	0.02	-0.05	-0.13	0	-0.08	-0.08	-0.11	-0.12	0.09	-0.2	-0.14	-0.19	0.09	-0.02	-0.21	-0.17	0.03	-0.08	-0.23	-0.13	-0.12	0.06	-0.23	-0.02	0
B4GALT2	0.03	-0.11	-0.05	-0.05	0.02	-0.07	0	-0.05	-0.09	0.03	-0.06	0.02	-0.08	-0.02	0.01	-0.11	-0.04	-0.03	0	-0.05	-0.1	-0.11	-0.01	-0.07	-0.08	-0.12	0.04	0	-0.02	-0.09	-0.02	-0.06	-0.07	-0.07	-0.1	-0.14	-0.06	0.01	-0.16	-0.03	0.06	-0.09	-0.1	-0.06	-0.06	-0.07	-0.1	0.16	-0.05
B4GALT3	0.02	0.08	0.05	0.18	-0.12	0.09	-0.14	0.06	-0.03	0.03	0.07	-0.02	0.1	0.22	0.04	0.19	-0.04	0.12	0.03	0.13	-0.11	0.12	0.06	0.15	0.11	0.02	-0.03	-0.05	0.1	0.09	0.15	0.13	0.17	0.09	0.17	0.07	-0.03	0.1	0.3	0.09	0	0.09	0.19	0.14	0.15	-0.1	0.1	0.15	0.01
B4GALT4	-0.13	-0.15	-0.26	-0.3	0.01	-0.19	0.19	-0.27	-0.21	-0.13	0.07	-0.04	-0.36	-0.24	-0.18	-0.32	-0.07	-0.35	-0.34	0.09	-0.15	-0.32	-0.35	-0.22	-0.22	-0.26	-0.17	-0.07	-0.18	-0.27	-0.22	-0.24	-0.29	-0.35	-0.24	-0.2	0.04	0.02	-0.37	-0.26	-0.01	-0.19	-0.41	-0.16	-0.17	0	-0.29	-0.04	-0.1
B4GALT5	-0.09	-0.14	-0.15	-0.16	-0.04	-0.13	0.08	-0.16	-0.11	0.02	0	0.08	-0.16	-0.12	-0.09	-0.2	-0.09	-0.19	-0.21	0.07	-0.11	-0.19	-0.21	-0.1	-0.14	-0.2	-0.16	-0.06	-0.11	-0.15	-0.21	-0.18	0.04	-0.18	-0.15	-0.17	-0.02	-0.11	-0.16	-0.2	0.03	-0.05	-0.24	-0.09	-0.12	-0.02	-0.22	-0.09	-0.08
B4GALT6	-0.1	0.01	0	-0.04	0.02	0.05	0	0.04	0.04	-0.02	-0.13	-0.04	-0.06	0.06	-0.07	-0.02	0.05	-0.01	0.01	0	0.06	0.01	-0.01	-0.05	-0.08	-0.02	-0.02	-0.03	0.03	-0.03	-0.04	-0.05	-0.02	-0.02	-0.03	0.08	-0.02	0.05	0.01	-0.04	0.01	-0.02	0	0	-0.01	-0.02	0.04	-0.13	0
B4GALT7	-0.05	-0.12	-0.06	-0.25	0.01	-0.15	0.13	-0.17	-0.19	-0.09	-0.12	-0.02	-0.27	-0.21	-0.08	-0.28	-0.06	-0.2	-0.16	-0.15	-0.01	-0.23	-0.24	-0.19	-0.1	-0.16	-0.11	0.02	-0.11	-0.19	-0.15	-0.26	-0.27	-0.26	-0.23	-0.23	0.05	0.03	-0.35	-0.16	0.06	-0.12	-0.31	-0.19	-0.14	0.05	-0.23	0.04	-0.12
B9D1	-0.03	-0.06	-0.19	-0.09	0	-0.1	0.19	-0.19	-0.22	-0.1	-0.12	-0.01	-0.17	-0.1	-0.05	-0.28	-0.14	-0.14	-0.16	0.02	0.05	-0.24	-0.16	-0.11	-0.08	-0.1	-0.12	-0.1	-0.07	-0.2	-0.1	-0.14	0.16	-0.21	-0.13	-0.23	0.05	0.04	-0.22	-0.15	0.04	-0.11	-0.17	-0.01	-0.15	-0.13	-0.26	0.03	-0.06
B9D2	0.08	0.04	0.14	0.1	-0.03	0.06	-0.05	0.1	0.07	0.02	-0.17	-0.03	0.1	0.01	0.08	0.04	0	0.1	0.14	-0.15	0.06	0.04	0.16	0.04	0.05	0.06	0.07	0.03	0.14	0.11	0.1	0.06	0.08	0.06	0.09	-0.02	-0.01	0.05	0.02	0.08	0.05	0.02	0.12	0.07	0.07	0	-0.03	0.05	-0.02
BAALC	-0.03	0.02	0.12	0.05	-0.09	0.06	-0.06	0.15	0.09	0.05	-0.19	-0.06	0.03	0.06	0.02	0.11	0.08	0.14	0.17	-0.14	0.02	0.08	0.16	0.04	0.03	0.08	0.17	0.06	-0.02	0.05	0.02	0.14	-0.06	0.11	0.02	0.06	-0.01	-0.06	0.09	0.16	-0.04	0.06	0.11	0.04	0.05	-0.04	0.19	-0.13	-0.05
BAAT	-0.08	-0.04	-0.03	0.01	-0.07	-0.02	0.03	-0.07	-0.06	-0.03	0.07	0	-0.02	0.02	-0.06	-0.04	-0.08	0.06	-0.07	0.02	-0.11	-0.08	-0.07	0.03	0.05	-0.14	-0.07	-0.04	0.05	-0.02	0.05	-0.06	-0.07	-0.07	0.04	-0.04	-0.03	0	0.03	-0.07	0.05	-0.04	-0.02	-0.02	0	0.02	-0.04	0.08	-0.01
BABAM1	0.04	0.02	0.17	0.05	-0.1	0.07	-0.15	-0.02	0.03	0.01	-0.17	-0.04	0.07	0.03	0.1	0.08	0	0.08	0.14	-0.17	0.17	0.03	0.09	0.01	-0.02	-0.02	0.05	0.08	0.07	0.13	0.11	0.08	-0.07	0.07	0.1	0.03	0.01	0.07	-0.03	0.09	0.04	0.05	0.1	0.03	0	0.03	0.05	0.08	-0.05
BACE1	0.01	-0.1	-0.09	-0.21	0.04	-0.19	0.08	-0.16	-0.16	0.04	-0.22	0.07	-0.23	-0.34	-0.06	-0.3	-0.04	-0.27	-0.12	-0.12	0	-0.17	-0.09	-0.23	-0.11	-0.08	0.02	-0.01	-0.19	-0.28	-0.2	-0.17	-0.27	-0.18	-0.29	-0.19	-0.02	0.03	-0.37	-0.15	0.03	-0.12	-0.3	-0.11	-0.17	-0.1	-0.16	0.05	-0.13
BACE2	-0.08	-0.13	-0.24	-0.29	-0.1	-0.22	0.02	-0.24	-0.19	-0.08	-0.08	-0.03	-0.35	-0.26	-0.16	-0.31	0	-0.36	-0.25	0.09	-0.14	-0.35	-0.34	-0.24	-0.11	-0.34	-0.27	-0.03	-0.12	-0.28	-0.23	-0.29	-0.18	-0.3	-0.33	-0.2	0.06	0	-0.39	-0.19	0.04	-0.21	-0.4	-0.18	-0.23	0.02	-0.28	-0.02	-0.11
BACH1	-0.04	0.02	0.11	0.12	-0.01	0.02	-0.1	0.1	0.09	-0.03	-0.11	-0.03	0.09	0.09	0.05	0.19	0.08	0.09	0.11	-0.11	0.18	0.09	0.15	0.05	0.03	0.13	0.14	0	0.1	0.18	0.11	0.09	-0.11	0.09	0.11	0.09	-0.03	0.08	0.08	0.09	-0.04	0.09	0.14	0.02	0.04	0.02	0.09	0.01	0.09
BACH2	0.14	0.13	0.13	0.08	0.04	0.07	-0.16	0.15	0.16	0.06	0.03	0.01	0.17	0.16	0.1	0.22	0.01	0.13	0.13	-0.09	0.02	0.22	0.17	0.12	0	0.13	0.09	0.16	0	0.19	0.16	0.14	0.06	0.14	0.14	0.1	-0.07	0.03	0.24	0.15	-0.09	0.12	0.17	0.09	0.14	-0.02	0.24	-0.08	0.05
BAD	-0.01	-0.11	-0.1	-0.21	0.03	-0.11	0.03	-0.13	-0.13	-0.01	-0.05	-0.01	-0.22	-0.28	-0.04	-0.25	-0.04	-0.12	-0.13	-0.1	-0.01	-0.18	-0.16	-0.19	-0.08	-0.13	-0.09	0	-0.09	-0.21	-0.12	-0.14	-0.32	-0.25	-0.19	-0.24	0	0.06	-0.3	-0.1	0.03	-0.15	-0.25	-0.08	-0.13	-0.02	-0.18	0.11	-0.07
BAG1	0.04	0.12	-0.02	0.19	0	0.14	-0.16	0.18	0.12	0.06	0.18	0.02	0.23	0.24	0.07	0.27	0.08	0.2	0.1	0.12	-0.05	0.23	0.17	0.19	0.13	0.16	0.07	0.03	0.1	0.17	0.19	0.16	0.16	0.24	0.19	0.15	-0.02	-0.12	0.33	0.21	-0.03	0.08	0.28	0.07	0.18	0.04	0.23	0.11	0.01
BAG2	-0.01	-0.05	-0.03	0.09	0.06	-0.03	0.01	-0.05	-0.08	0.02	-0.13	-0.02	0.03	-0.02	-0.04	-0.06	0.03	-0.01	0.02	-0.14	0.06	-0.08	0.05	0	0.08	0.02	0.06	-0.06	0.04	0.06	0.08	0.03	0.15	-0.04	0.1	-0.07	-0.03	0.02	-0.11	0.05	0.05	-0.01	0.1	0.04	0.01	0.02	-0.1	0.05	0.03
BAG3	-0.06	-0.19	-0.28	-0.25	0.01	-0.26	0.19	-0.29	-0.34	-0.05	-0.05	0	-0.33	-0.3	-0.13	-0.43	-0.12	-0.24	-0.28	-0.09	0.02	-0.31	-0.34	-0.25	-0.12	-0.23	-0.18	-0.04	-0.15	-0.24	-0.2	-0.32	-0.18	-0.33	-0.32	-0.3	0.08	-0.01	-0.52	-0.24	0.06	-0.13	-0.39	-0.17	-0.27	0.01	-0.39	0.06	-0.02
BAG4	0.01	0.01	0.04	0.15	0.1	0.08	0.05	0.02	0.02	-0.02	-0.04	0	0.13	0.13	0.1	0.08	0.08	0.18	0.09	-0.03	0.12	0.01	0.17	0.1	0.08	0.14	0.07	-0.03	0.14	0.15	0.14	0.15	0.23	0.13	0.1	0.03	-0.04	0.04	0.06	0.07	0.01	0.1	0.18	0.08	0.03	0.09	0.04	-0.1	0.1
BAG5	-0.01	0.11	0.02	0.14	0.08	0.15	0.03	0.19	0.13	0.03	0.19	0.06	0.16	0.16	0.07	0.14	0.1	0.12	0.01	0.12	0.05	0.19	0.09	0.08	0	0.11	0	0.04	0.01	0.12	0.02	0.08	-0.09	0.16	0.09	0.13	-0.03	0.02	0.24	0.05	-0.04	0.08	0.11	0.08	0.1	0.02	0.12	-0.05	0.09
BAG6	0.08	0.09	0.11	0.08	-0.02	0.05	-0.15	0.1	0.06	0.03	-0.07	0.04	0.07	0.14	0.05	0.17	0.07	0.14	0.08	-0.02	0.01	0.1	0.14	0.09	0.04	0.01	0.04	-0.02	0.06	0.09	0.03	0.09	0.3	0.15	0.08	0.05	-0.02	-0.11	0.1	0.07	-0.02	0	0.12	0.06	0.01	0.1	0.14	0	-0.05
BAHCC1	0.13	0.07	-0.06	0.02	-0.07	0.06	-0.14	0.09	0.09	0.1	0.06	0.1	0.08	-0.01	0.06	0.02	-0.03	-0.01	-0.04	0.01	0.01	0.04	0.05	0.07	-0.1	-0.07	0.05	-0.02	-0.06	-0.03	-0.11	-0.03	0.16	0.09	-0.04	0.01	-0.06	-0.01	-0.05	0.04	0.05	0.04	0.01	0.02	0.05	0.05	0.05	0.03	0.03
BAHD1	0.01	0.07	0.11	0.19	-0.05	0.13	-0.17	0.18	0.11	0.02	0.04	0.03	0.2	0.21	0.12	0.25	0.05	0.14	0.2	-0.05	0.09	0.29	0.22	0.21	0.14	0.2	0.11	0.06	0.13	0.24	0.15	0.16	0.21	0.25	0.21	0.16	0.03	-0.07	0.29	0.11	-0.07	0.19	0.31	0.05	0.13	0.05	0.21	0.06	0.05
BAI1	0.2	-0.01	0	0.03	-0.08	0.06	-0.12	-0.01	0.03	0.04	0.06	-0.03	0.07	0.1	0.01	0	-0.01	0.04	0.03	-0.06	-0.07	0.05	0.03	0.05	0	-0.04	-0.02	0.02	0.01	0.04	0.04	0	0.12	0.05	0.03	-0.02	0.02	0.08	0.01	0.02	0.01	0.05	0.06	0.01	0.06	0.04	-0.01	0.1	-0.04
BAI2	0.17	0.03	0.05	-0.06	0.07	-0.03	-0.04	-0.02	-0.01	0.05	-0.11	0.04	0.01	-0.1	0.04	-0.07	-0.1	-0.12	0.06	-0.05	-0.01	-0.02	0.07	-0.05	-0.1	0.06	0.06	0.07	-0.05	-0.12	-0.06	-0.01	0.09	-0.01	-0.06	-0.05	0.01	-0.03	-0.14	0.02	0.01	-0.04	-0.08	0.05	-0.01	-0.11	-0.05	0.03	0.03
BAI3	0.07	0.1	0.2	0.14	0	0.14	-0.06	0.09	0.17	0.06	-0.06	0.02	0.17	0.1	0.04	0.16	0.05	0.13	0.15	0.03	-0.02	0.18	0.17	0.08	0.07	0.12	0.06	-0.01	0.06	0.07	0.09	0.17	-0.08	0.12	0.1	0.09	-0.07	0.01	0.24	0.14	-0.01	0.1	0.18	0.08	0.08	-0.04	0.19	0.02	-0.02
BAIAP2	0.04	-0.14	-0.27	-0.25	0	-0.21	0.11	-0.25	-0.27	0.02	0.14	0.01	-0.25	-0.29	-0.11	-0.29	-0.11	-0.28	-0.3	0.13	-0.11	-0.27	-0.31	-0.18	-0.13	-0.28	-0.26	-0.09	-0.16	-0.25	-0.23	-0.28	-0.16	-0.22	-0.31	-0.26	0.04	0.01	-0.3	-0.28	0.05	-0.12	-0.39	-0.18	-0.18	-0.01	-0.32	0.12	-0.03
BAIAP2-AS1	0.09	-0.05	0	-0.16	-0.03	-0.11	0.04	-0.06	-0.03	0.09	-0.05	0.05	-0.12	-0.27	-0.06	-0.19	0	-0.17	-0.09	0.1	0.05	-0.07	-0.06	-0.12	-0.1	-0.05	-0.08	-0.08	-0.12	-0.21	-0.22	-0.12	-0.05	-0.08	-0.2	-0.13	0.1	-0.04	-0.14	-0.17	0.08	-0.06	-0.19	-0.08	-0.07	-0.04	-0.19	0.02	-0.09
BAIAP2L1	-0.06	-0.12	-0.29	-0.24	0.01	-0.2	0.26	-0.22	-0.19	-0.09	0.21	0	-0.26	-0.22	-0.16	-0.31	-0.1	-0.29	-0.34	0.29	-0.2	-0.31	-0.39	-0.14	-0.09	-0.35	-0.33	-0.11	-0.09	-0.28	-0.22	-0.27	-0.17	-0.25	-0.23	-0.19	0.06	-0.03	-0.25	-0.29	0.06	-0.16	-0.34	-0.13	-0.13	0.02	-0.33	0.02	-0.03
BAIAP2L2	-0.07	-0.11	-0.17	-0.11	-0.09	-0.04	-0.07	-0.16	-0.1	-0.11	0.03	-0.03	-0.17	-0.03	-0.1	-0.13	-0.1	-0.05	-0.14	0.08	-0.19	-0.21	-0.21	-0.06	-0.04	-0.17	-0.14	-0.04	-0.04	-0.07	-0.06	-0.15	-0.07	-0.17	-0.11	0	0.03	0.03	-0.05	-0.14	0.09	-0.04	-0.14	-0.12	-0.06	0	-0.06	0.03	-0.09
BAIAP3	-0.04	0.05	-0.04	-0.07	0.04	-0.01	0.11	-0.03	-0.04	-0.05	0.1	-0.01	-0.06	0.02	-0.04	-0.01	-0.08	0.03	-0.17	0.07	-0.12	-0.03	-0.12	-0.02	0.01	-0.13	-0.18	-0.08	-0.03	-0.04	-0.01	-0.05	0.15	-0.07	-0.02	-0.06	-0.05	0.18	0.14	-0.02	-0.01	0.02	-0.05	-0.02	0	0.03	-0.04	-0.01	-0.07
BAMBI	0	-0.05	-0.25	-0.22	0.05	-0.13	0.14	-0.16	-0.04	-0.07	-0.13	0.04	-0.25	-0.18	-0.09	-0.17	-0.06	-0.28	-0.12	0.14	-0.16	-0.17	-0.14	-0.15	-0.15	-0.07	0.02	-0.05	-0.12	-0.26	-0.1	-0.16	0.01	-0.22	-0.16	-0.02	0.05	-0.01	-0.19	-0.13	0.04	-0.12	-0.24	-0.08	-0.08	-0.05	-0.09	0.03	-0.17
BANF1	0.04	0	0.05	0.08	0.03	0.02	0.02	-0.01	-0.05	0.04	0.01	0	0.03	0.02	0.05	-0.02	-0.05	0.11	0.02	-0.03	0.05	-0.05	0.06	-0.02	0.04	0.03	-0.02	-0.03	0.06	0.03	0.05	0.05	0.03	0.03	0.06	-0.02	-0.01	0.01	0.02	0.06	-0.01	-0.03	0.06	0.02	0.04	-0.03	-0.03	0.05	-0.05
BANF2	0.02	-0.02	0	-0.01	-0.06	0.04	-0.06	0.03	-0.04	0	0.09	0	0.01	0.09	-0.04	0.03	0.01	0.07	-0.04	-0.07	-0.06	0.07	0	0	0.02	-0.02	0	0.06	0.03	0.05	0	0.03	0.13	0.03	0.05	0.02	0.04	-0.07	0.08	0.02	-0.01	0.09	0	-0.01	0.02	0.06	0.04	-0.03	-0.01
BANK1	0.11	0.03	0.1	0.06	0.01	0.08	-0.13	0.15	0.12	0.04	0.14	0	0.12	0.06	0.06	0.14	0.09	0.1	0.03	0.05	0.02	0.11	0.02	0.02	0.08	0.13	-0.07	0.05	0	0.08	0.1	0.09	0.1	0.03	0.08	-0.01	0.08	0.01	0.18	0.07	-0.03	0.11	0.05	0.04	0.08	0.06	-0.01	0.05	0.05
BANP	0.09	0.12	0.1	0.15	0.05	0.06	0.01	0.03	0.08	0.01	0.04	0.01	0.13	0.17	0.05	0.14	-0.01	0.06	0.1	-0.04	-0.02	0.07	0.08	0.01	0.04	0.06	0	0.09	0.05	0.14	0.09	0.06	0.01	0.11	0.16	0.07	-0.09	0.06	0.18	0.14	0.02	0.08	0.21	0.08	0	0.01	0.14	0.18	0.07
BAP1	0.08	0.08	0.15	0.18	-0.1	0.13	-0.32	0.09	0.09	0.01	-0.1	0.03	0.15	0.14	0.13	0.22	0.06	0.17	0.2	-0.18	0.13	0.17	0.23	0.15	0.04	0.14	0.19	0.06	0.17	0.22	0.11	0.13	0.15	0.2	0.14	0.13	-0.03	0.03	0.11	0.12	-0.06	0.11	0.21	0.04	0.11	0.04	0.2	-0.01	0.06
BARD1	0	0.16	0.17	0.28	0.01	0.19	-0.16	0.24	0.13	0.04	0.05	0.01	0.23	0.17	0.11	0.23	0.11	0.22	0.19	-0.04	0.12	0.21	0.21	0.13	0.13	0.06	0.1	0.14	0.09	0.25	0.2	0.22	0.04	0.23	0.22	0.15	0.01	-0.09	0.25	0.26	-0.01	0.13	0.28	0.09	0.13	0.06	0.25	-0.01	0.17
BARHL1	0.03	0.09	0.03	0.08	-0.05	0.08	-0.07	0.09	0.06	0.04	0.03	0.03	0.1	0.09	0.08	0.12	0.01	0.07	0.01	-0.04	0.03	-0.01	0.05	0.06	0.04	-0.03	0.01	0.05	0.06	0.06	0.09	0.09	0.05	0.05	0.07	0.03	0.03	-0.02	0.11	0.06	0.07	0.09	0.1	0.02	0.03	0.07	0.05	0.04	0.01
BARX1	0.06	0.13	0.03	0.1	0.02	0.05	-0.02	0.06	0.02	0.06	0.1	0.05	0.08	0.18	0.14	0.03	0	0.08	0	0.02	-0.07	0.08	0.04	0.09	0.05	0.03	0.01	0	0.02	0.04	0.01	0.02	0.23	0.08	0.08	0.04	-0.14	0.03	0.12	0.06	0.05	0.06	0.11	0.08	0.12	0	0	0.08	0.05
BARX2	-0.03	-0.04	-0.06	-0.03	0.06	-0.01	0.06	-0.05	-0.05	0.02	0.2	0.01	-0.01	0	-0.02	-0.03	0.01	-0.01	-0.14	0.18	-0.12	-0.08	-0.15	-0.01	0.01	-0.08	-0.15	-0.06	0	-0.02	-0.02	-0.02	0.1	-0.05	-0.02	-0.02	0	-0.02	-0.01	-0.03	-0.01	-0.06	-0.01	-0.01	0.02	0.03	-0.04	0.1	0.05
BASP1	-0.06	-0.04	0.11	-0.04	0.1	-0.08	0.01	0.03	-0.03	0.08	-0.02	0.01	0.02	-0.07	0.06	-0.06	0.04	-0.06	0	-0.13	0.05	0.01	-0.03	-0.13	-0.03	0.08	0.05	0.1	-0.08	-0.01	0	-0.06	-0.29	-0.02	-0.07	-0.13	-0.04	-0.01	-0.12	0.01	0.04	0.02	-0.04	-0.02	-0.09	-0.04	-0.11	0.03	0.05
BATF	0.02	0.08	0.07	0.14	-0.1	0.14	-0.17	0.13	0.1	0.01	0.11	0.06	0.11	0.19	0.1	0.25	0.05	0.13	0.08	0.02	0.02	0.11	0.06	0.15	0.2	0.05	-0.01	0.05	0.1	0.18	0.17	0.06	0.12	0.09	0.18	0.14	0.04	-0.04	0.23	0.09	-0.03	0.11	0.1	0.03	0.16	0.15	0.12	0.03	0.02
BATF2	0.04	-0.04	-0.06	-0.04	-0.1	-0.07	0.03	-0.13	-0.08	-0.06	0.08	0	-0.07	0.02	-0.04	-0.11	0.05	0.01	-0.16	0.02	-0.06	-0.1	-0.15	-0.02	-0.11	-0.14	-0.15	0	-0.07	-0.06	-0.03	-0.1	-0.06	-0.08	-0.06	-0.05	-0.01	0.09	-0.04	-0.1	0.02	-0.01	-0.1	-0.08	-0.17	0.13	-0.07	0.09	0.08
BATF3	0.11	0.09	0.22	0.18	-0.07	0.06	-0.25	0.09	0.16	0.03	-0.16	0.03	0.18	0.1	0.13	0.12	0.09	0.08	0.17	-0.11	0.08	0.13	0.19	0.08	0.04	0.04	0.1	0.05	0.11	0.18	0.08	0.12	0	0.11	0.18	0.04	-0.03	0.07	0.03	0.16	-0.03	0.12	0.21	0.09	0.08	0.04	0.07	0.02	0.14
BAX	-0.12	0.02	0.07	0.08	-0.05	0.09	-0.03	0.06	0.07	-0.04	-0.18	-0.05	-0.02	0.06	0.06	0.03	-0.02	0.07	0.09	-0.08	0.03	0.01	0.05	0.06	0.02	-0.07	0.08	0.05	0.07	0.03	0.09	0.02	0.22	0.01	0.05	0.02	0.02	0.02	-0.02	0.09	0.07	-0.02	0.02	0.03	0.02	-0.03	0.02	0.01	0.01
BAZ1A	-0.03	0.05	0.11	0.32	0.03	0.17	0.02	0.2	0.14	0.08	0.18	0.07	0.32	0.27	0.15	0.25	0.06	0.27	0.16	0.1	0.07	0.2	0.2	0.18	0.14	0.08	0.02	0.09	0.09	0.24	0.17	0.19	0.13	0.3	0.22	0.12	-0.06	0.02	0.37	0.17	0	0.18	0.31	0.15	0.13	0.04	0.15	-0.01	0.2
BAZ1B	0.07	0.13	0.11	0.21	-0.07	0.12	-0.23	0.27	0.18	0.07	-0.03	0.02	0.23	0.19	0.14	0.2	0.05	0.11	0.26	-0.06	0.04	0.24	0.23	0.19	0.1	0.14	0.13	0.11	0.04	0.18	0.15	0.17	0.23	0.24	0.18	0.19	-0.05	-0.1	0.29	0.17	-0.01	0.07	0.27	0.12	0.13	-0.05	0.25	0.02	0.02
BAZ2A	0.04	0.05	0.06	0.12	-0.03	0.11	-0.12	0.02	0.04	-0.01	0.22	0	0.16	0.2	0.1	0.22	-0.04	0.12	-0.01	0.12	-0.09	0.15	0.04	0.2	0.14	-0.01	-0.06	0.02	0.06	0.2	0.13	0.09	0.26	0.11	0.18	0.08	-0.03	0.06	0.3	0.05	0	0.11	0.19	0.06	0.13	0.04	0.1	0.06	0.13
BAZ2B	-0.06	0.02	-0.06	0.03	0.1	0.01	0.21	0.06	0.08	0.08	0.18	0.02	0.1	-0.02	0	0.03	0.03	-0.05	-0.03	0.21	-0.02	0.05	0.02	0.08	-0.04	0.04	0.01	-0.05	-0.13	0.01	-0.02	0.01	0.02	0.13	-0.01	0.04	0.03	-0.03	0.12	-0.03	0.02	-0.01	0.01	0.06	0.02	0	0.03	-0.05	0.05
BBC3	-0.02	-0.01	0.01	0.08	-0.05	0.06	-0.05	-0.06	-0.01	-0.05	0.08	-0.02	0.06	0.01	0.01	0.11	-0.05	0.06	0.02	0.05	-0.08	0.03	0	0.14	0.09	-0.08	-0.06	-0.04	0.08	0.07	0.1	0.03	0.12	0.03	0.05	0.05	-0.04	0.02	0.03	0.02	0.04	-0.04	0.06	-0.01	0.08	0.03	0.01	0.02	0.08
BBIP1	-0.03	0.04	0.09	0.02	0.03	-0.02	0.06	0.08	0.03	0.01	-0.19	-0.06	0.05	0	0.03	0.04	0	0.06	0.11	-0.17	0.16	0.09	0.12	0.02	0.08	0.14	0.12	-0.02	0.04	-0.01	0.08	0.04	0.03	0.03	0.06	0.04	-0.02	-0.01	0.1	0.1	-0.02	0.09	0.13	0.09	0.05	-0.14	0.04	0.03	-0.04
BBOX1	-0.05	-0.05	-0.04	0	0.03	0.05	0.15	0.01	0.04	-0.02	0.14	-0.01	0.03	0.08	0.06	-0.05	-0.07	0.02	-0.01	-0.01	-0.01	0.01	-0.03	-0.06	-0.01	-0.02	-0.06	0.06	0.02	-0.04	-0.03	0.03	-0.25	-0.05	0.03	-0.03	0.03	-0.05	-0.02	-0.04	-0.05	0.06	-0.03	-0.05	0.02	0.01	-0.07	-0.07	0.01
BBS1	-0.05	-0.05	-0.09	-0.14	0.07	-0.05	0.07	-0.03	-0.06	0.01	0.15	0.02	-0.08	-0.18	-0.07	-0.13	-0.09	-0.1	-0.12	0.12	-0.14	-0.01	-0.1	-0.04	-0.04	0.01	-0.12	-0.09	-0.11	-0.19	-0.12	-0.06	-0.04	-0.08	-0.1	-0.13	0.05	0.02	-0.1	-0.11	0.01	-0.13	-0.17	-0.03	0.02	-0.13	-0.08	-0.04	-0.07
BBS10	-0.08	-0.01	0.04	-0.09	0.11	-0.09	0.17	-0.01	-0.08	0.02	-0.13	-0.06	-0.09	-0.11	-0.04	-0.14	0	-0.14	-0.04	-0.14	0.09	-0.04	-0.03	-0.07	-0.04	0	-0.03	-0.03	-0.05	-0.13	-0.07	-0.1	-0.12	-0.05	-0.13	-0.11	-0.01	0.1	-0.1	-0.07	-0.02	-0.04	-0.09	-0.03	-0.11	-0.11	-0.13	-0.04	-0.01
BBS12	0.05	-0.04	0.01	-0.16	0	-0.1	0.04	-0.1	-0.08	-0.04	-0.15	-0.03	-0.11	-0.13	-0.06	-0.16	-0.03	-0.12	0.02	-0.21	0.18	-0.09	-0.08	-0.12	-0.12	-0.08	0.02	0.03	-0.06	-0.1	-0.09	-0.07	-0.04	-0.14	-0.14	-0.09	0.03	0.09	-0.23	-0.07	0.04	-0.06	-0.13	-0.08	-0.1	0.02	-0.11	0.03	0
BBS2	-0.09	-0.1	-0.05	-0.09	-0.02	-0.05	0.06	-0.11	-0.11	0.01	0.04	0.06	-0.06	-0.16	-0.02	-0.15	-0.13	-0.13	-0.07	0	0.05	-0.1	-0.09	-0.01	-0.02	-0.09	-0.06	-0.01	-0.1	-0.1	-0.1	-0.09	0.07	-0.05	-0.11	-0.08	-0.01	0.08	-0.17	-0.16	0.01	-0.06	-0.13	0.01	-0.08	-0.03	-0.14	-0.11	0
BBS4	-0.08	-0.06	-0.01	-0.02	0.01	-0.02	0.06	-0.07	-0.03	-0.01	-0.16	-0.03	-0.03	0	0	-0.01	-0.03	-0.05	0.06	-0.08	0.02	0.01	0.06	-0.01	-0.04	0.12	0.1	-0.01	0	-0.07	-0.02	0.03	-0.15	-0.05	0.01	0.06	0.06	-0.02	0.01	-0.03	-0.03	0.05	0.05	0.11	-0.02	-0.1	0.03	-0.17	-0.02
BBS5	-0.03	-0.05	-0.1	-0.07	-0.05	0.01	-0.06	-0.05	-0.14	-0.03	-0.13	0.05	-0.08	0.03	0.02	-0.12	-0.04	-0.06	-0.03	0	-0.01	-0.1	-0.02	-0.1	-0.09	-0.04	0.01	-0.02	-0.02	-0.15	-0.03	0	0.02	-0.12	-0.12	-0.1	0.05	-0.12	-0.1	-0.06	0.01	-0.05	-0.09	0	-0.04	-0.06	-0.07	-0.18	-0.08
BBS7	-0.01	0.03	0.09	0.13	0.02	0.02	0.09	0.01	0.03	0.03	-0.16	-0.05	0.11	0.06	0	0.05	0.02	0.13	0.16	-0.14	0.17	0.06	0.16	0.03	0.04	0.11	0.15	0.03	0.05	0.14	0.06	0.09	0.06	0.06	0.12	0.01	-0.14	0.13	0.03	0.08	-0.06	0.02	0.19	0.11	0.03	-0.08	0.07	-0.02	0.09
BBS9	0.06	0.03	0.12	-0.12	0.04	-0.05	0.02	-0.01	0.02	0.02	-0.19	0	-0.05	-0.11	0.05	-0.05	-0.03	-0.14	0.06	-0.11	0.15	-0.02	0.02	-0.09	-0.08	0	0.06	0.11	-0.06	-0.13	-0.05	0.01	-0.13	-0.04	-0.06	0	-0.01	0.12	-0.13	0.03	0.01	-0.03	-0.09	0.02	-0.06	-0.05	0.05	0	-0.01
BBX	-0.02	-0.12	-0.09	-0.06	0.05	-0.1	0.02	-0.07	-0.12	-0.02	-0.06	-0.04	-0.09	-0.07	-0.03	-0.09	0.06	-0.15	-0.1	-0.14	-0.01	-0.12	-0.12	-0.09	-0.01	-0.18	-0.05	0.07	-0.09	-0.05	-0.08	-0.09	-0.02	-0.09	-0.08	-0.13	-0.02	0.03	-0.15	-0.02	0.03	0	-0.08	-0.05	-0.17	0.04	-0.17	-0.05	0.03
BCAM	0.02	-0.13	-0.2	-0.2	0.08	-0.15	0.23	-0.18	-0.15	-0.03	0.16	-0.01	-0.22	-0.3	-0.07	-0.27	-0.16	-0.22	-0.25	0.14	-0.14	-0.23	-0.26	-0.13	-0.06	-0.19	-0.22	-0.07	-0.15	-0.2	-0.16	-0.22	-0.01	-0.24	-0.2	-0.19	0.09	-0.03	-0.24	-0.23	0.05	-0.13	-0.32	-0.13	-0.17	0.02	-0.3	0.02	-0.06
BCAN	0.08	0.07	0.02	0.08	-0.08	0.12	-0.02	0.07	0.06	-0.05	0.01	0.01	0.1	0.13	0.03	0.15	-0.03	0.05	0.06	-0.04	-0.1	0.01	0.12	0.11	0.09	-0.04	0.04	0.04	0.07	0.08	0.13	0.09	0.18	0.1	0.1	0.07	0.02	0	0.13	0.08	0	0.1	0.14	0	0.06	0.07	0.16	0.12	0.06
BCAP29	-0.03	-0.14	-0.11	-0.15	-0.08	-0.14	0.05	-0.14	-0.14	-0.04	-0.21	-0.04	-0.25	-0.17	-0.08	-0.21	0.04	-0.13	-0.02	-0.23	0.12	-0.18	-0.15	-0.19	-0.02	-0.2	-0.03	0.01	-0.08	-0.16	-0.07	-0.13	-0.32	-0.18	-0.22	-0.15	0.06	0.02	-0.31	-0.13	0.01	-0.09	-0.23	-0.13	-0.19	0.12	-0.13	-0.05	-0.02
BCAP31	0.02	-0.07	-0.23	-0.2	-0.06	-0.15	-0.02	-0.18	-0.18	-0.02	0.08	0.04	-0.24	-0.18	-0.14	-0.2	-0.08	-0.19	-0.2	0.15	-0.05	-0.18	-0.25	-0.14	-0.05	-0.2	-0.17	-0.07	-0.01	-0.2	-0.13	-0.21	0.08	-0.2	-0.2	-0.17	0.04	-0.09	-0.18	-0.21	0.05	-0.17	-0.28	-0.15	-0.08	0.06	-0.23	0.08	-0.12
BCAR1	0.05	-0.19	-0.19	-0.35	0.06	-0.23	0.21	-0.36	-0.29	-0.05	-0.04	-0.02	-0.34	-0.38	-0.21	-0.42	-0.14	-0.34	-0.29	-0.06	-0.1	-0.38	-0.38	-0.33	-0.13	-0.3	-0.16	-0.02	-0.19	-0.31	-0.21	-0.35	-0.25	-0.38	-0.37	-0.24	0	0.07	-0.5	-0.28	0.07	-0.22	-0.47	-0.26	-0.25	0	-0.32	0.13	-0.07
BCAR3	-0.02	-0.21	-0.14	-0.31	0.03	-0.24	0.17	-0.31	-0.27	-0.06	-0.11	-0.05	-0.36	-0.41	-0.17	-0.41	-0.1	-0.38	-0.27	-0.08	-0.06	-0.38	-0.37	-0.34	-0.11	-0.32	-0.22	-0.02	-0.19	-0.3	-0.24	-0.3	-0.27	-0.38	-0.34	-0.29	0.07	0.02	-0.51	-0.22	0.04	-0.22	-0.48	-0.2	-0.26	0.04	-0.39	0.03	-0.05
BCAR4	0.04	0.07	0.11	0.08	0.11	0.06	-0.02	0.01	0.07	0.06	0.06	0.01	0.11	0.12	0.02	0.13	0.02	0.16	0.07	-0.07	0.04	0.05	0.1	0	0.07	0.12	0.04	0.09	0.08	0.11	0.11	0.13	-0.09	0.05	0.05	0	0.02	0.09	0.17	0.17	-0.02	0.06	0.15	-0.02	0.09	0.05	0.11	0.08	0.06
BCAS1	0	-0.01	-0.07	-0.03	0	0.05	-0.03	-0.02	-0.03	-0.05	0.21	0	-0.01	0.04	-0.03	0.04	-0.05	0.05	-0.1	0.21	-0.12	0.02	-0.09	0.03	0.03	0.02	-0.1	-0.02	-0.01	-0.02	0.05	-0.01	0.2	0.01	0.04	0.02	0.04	-0.1	0.16	-0.01	0	-0.06	-0.05	-0.03	0.04	0.04	0.02	0	0.05
BCAS2	-0.04	0	0.06	0.1	0.06	0.03	0.07	-0.03	0	0.05	-0.09	-0.01	0.03	0.05	0.08	-0.03	-0.02	0.07	0.01	-0.02	-0.02	-0.09	0.08	-0.05	-0.02	0.03	0.02	0.05	0.06	-0.02	-0.03	0.07	-0.09	-0.01	0.11	-0.07	-0.02	0.06	-0.04	0.04	0.02	0.06	0.07	0.1	-0.04	-0.01	-0.01	-0.06	0
BCAS3	-0.02	0.04	-0.09	-0.1	-0.02	0.01	0.02	-0.01	-0.03	0.04	0.02	0.03	-0.03	-0.05	-0.05	0.02	0.01	-0.12	-0.06	0.04	0.01	-0.01	-0.01	0.01	-0.05	-0.07	0	-0.1	-0.01	-0.14	-0.11	-0.02	-0.04	0.02	-0.09	0.02	0.01	0.02	0.01	-0.02	0.03	-0.05	-0.01	-0.01	0.02	-0.07	-0.01	-0.04	-0.05
BCAS4	-0.12	0	0.03	-0.03	0.02	0.05	-0.05	0.03	-0.09	0.02	0.04	0.01	0.01	0	0.08	-0.1	-0.1	0.05	0	-0.16	0.1	-0.03	-0.06	-0.02	0	-0.01	-0.09	0.14	-0.04	0	0.06	0.02	0.02	-0.09	-0.02	-0.1	-0.04	0	-0.08	0.05	0.01	-0.01	-0.08	0.01	-0.05	-0.08	-0.14	-0.05	0.15
BCAT1	0.02	-0.03	0.22	0.16	0.04	0.05	-0.2	0.15	0.1	0.05	-0.04	-0.01	0.23	0.12	0.12	0.13	0.09	0.21	0.16	-0.22	0.14	0.12	0.22	0.12	0.04	0.18	0.17	0.05	0.05	0.22	0.09	0.11	0	0.19	0.1	0.02	-0.1	0	0.11	0.16	0	0.1	0.18	0.09	0.06	-0.02	0.06	-0.07	0.13
BCAT2	-0.03	0.03	0	0.1	-0.03	0.06	0	0.06	0.01	-0.02	0.07	0.01	0.12	0.1	0.03	0.1	-0.1	0.1	0.04	0.12	-0.13	0.02	0.09	0.12	0.02	-0.01	-0.01	-0.01	0.13	0.07	0.12	0.08	0.12	0.06	0.17	0.06	0.01	0	0.15	0.02	0.02	0.04	0.16	0.11	0.12	-0.03	-0.02	0.02	0.02
BCCIP	-0.05	-0.03	0.03	0.16	0.03	0.03	0.02	0.03	-0.05	0.08	-0.01	-0.05	0.12	0.14	0.01	0.04	0.09	0.21	0.03	-0.07	0.07	0.02	0.05	0.05	0.05	0.06	0	0	0.14	0.11	0.1	0.06	0.14	0.07	0.11	-0.04	-0.06	-0.03	0.17	0.03	0.05	0.11	0.21	0.04	-0.01	0	-0.06	0.01	0.07
BCDIN3D	0.04	0.15	0.12	0.17	-0.03	0.16	-0.12	0.16	0.2	0.01	0.14	-0.01	0.27	0.27	0.12	0.3	-0.02	0.17	0.15	0.13	0.05	0.29	0.2	0.19	0.08	0.24	0.13	0.04	0.08	0.13	0.18	0.17	0.05	0.25	0.22	0.22	0.05	-0.03	0.38	0.17	-0.11	0.12	0.32	0.17	0.18	-0.08	0.23	0.01	0.05
BCDIN3D-AS1	-0.05	-0.01	0.03	0.04	-0.03	0.08	-0.01	0.04	0.02	0.05	-0.01	-0.01	0.07	0.03	0.04	0.07	-0.01	-0.01	0.09	-0.11	0.01	0.02	0.1	-0.02	-0.01	0	0.03	0.05	-0.01	0	0.05	0.07	0.01	0.02	0.06	0.01	-0.03	0.02	0.05	0.04	-0.02	0.09	0.08	0.03	0.03	0	0.03	-0.07	0.04
BCHE	0.03	-0.03	0.02	0	0.02	-0.01	0.02	0	0.01	0	-0.18	-0.04	-0.03	-0.03	-0.01	0.01	0.03	0	0.05	-0.03	-0.03	-0.04	0.02	-0.09	-0.05	0.01	0.05	0.02	0.05	-0.06	0.03	0.01	0.01	-0.05	-0.01	-0.02	-0.09	0.05	0.01	0.02	-0.04	0.01	0.04	0.02	-0.04	-0.1	0	-0.04	0.03
BCKDHA	-0.01	0.07	0.2	0.16	-0.04	0.16	-0.15	0.2	0.2	0.03	0.08	0.06	0.27	0.23	0.12	0.29	-0.05	0.17	0.16	0.05	-0.07	0.23	0.21	0.22	0.09	0.18	0.08	0.06	0.13	0.2	0.14	0.17	0	0.23	0.21	0.1	0.03	0.01	0.34	0.1	-0.03	0.13	0.26	0.12	0.15	-0.07	0.17	-0.04	-0.05
BCKDHB	0.01	0.09	0.16	0.16	-0.02	0.21	-0.1	0.07	0.11	0.02	0.03	0.05	0.23	0.21	0.08	0.25	0	0.29	0.17	0	0.19	0.13	0.21	0.15	0.1	0.18	0.11	0.03	0.1	0.16	0.2	0.19	0.27	0.22	0.23	0.11	0.04	0.06	0.28	0.11	-0.01	0.09	0.27	0.12	0.14	-0.04	0.2	0.02	-0.01
BCKDK	-0.04	-0.03	0.02	-0.11	-0.09	-0.04	-0.22	-0.06	-0.13	0.02	-0.19	-0.03	-0.15	-0.12	-0.03	-0.1	-0.05	-0.07	-0.02	-0.16	0.06	-0.08	-0.12	-0.09	-0.01	-0.11	-0.05	0.07	-0.01	-0.09	-0.02	-0.11	-0.06	-0.18	-0.16	-0.13	0.02	0	-0.19	-0.06	0.06	-0.04	-0.15	-0.1	-0.08	-0.03	-0.11	0.13	-0.14
BCL10	-0.12	-0.08	-0.01	-0.1	0.05	-0.05	0.17	-0.11	-0.18	-0.01	0.07	-0.06	-0.11	-0.17	-0.1	-0.23	-0.06	-0.12	-0.1	0	0.13	-0.16	-0.18	-0.11	-0.06	-0.13	-0.14	-0.08	-0.06	-0.07	-0.19	-0.09	-0.16	-0.16	-0.15	-0.18	0.13	0	-0.26	-0.12	0.01	-0.16	-0.22	-0.11	-0.1	0.07	-0.19	0.04	0.08
BCL11A	0.1	0.12	0.16	0.31	0.02	0.16	-0.14	0.23	0.27	0.02	0.23	0.04	0.35	0.35	0.13	0.31	0.05	0.33	0.2	0.11	0.03	0.26	0.24	0.25	0.07	0.16	0.12	0.08	0.14	0.27	0.16	0.23	0.08	0.35	0.25	0.2	-0.05	0.07	0.42	0.19	-0.01	0.16	0.41	0.14	0.2	-0.05	0.25	0.08	0.12
BCL11B	0.07	0.05	0.02	0.17	0.03	0.03	0.01	0.04	0.06	0.03	0.2	0.04	0.21	0.12	0.09	0.15	0.02	0.15	0.08	0.2	-0.07	0.06	0.12	0.14	-0.04	0.07	0.06	-0.01	0.06	0.19	0.05	0.09	0.01	0.2	0.15	0.11	0.01	0.06	0.17	0.12	0.01	0.07	0.21	0.09	0.12	-0.02	0.14	0.07	0.21
BCL2	0.06	0.17	0.2	0.24	-0.07	0.14	-0.25	0.31	0.33	0.05	-0.06	-0.04	0.22	0.25	0.17	0.32	0.06	0.17	0.27	-0.07	0.03	0.28	0.3	0.2	0.11	0.17	0.19	0.05	0.14	0.2	0.17	0.24	-0.07	0.26	0.25	0.23	-0.06	0.06	0.31	0.2	-0.05	0.13	0.32	0.14	0.17	0	0.33	0.09	-0.01
BCL2A1	-0.06	0	0.08	0.06	-0.12	0.11	-0.17	0.02	0.03	-0.03	-0.07	-0.05	0	0.12	0.06	0.1	0.05	0.16	0.07	-0.15	0.07	0.03	-0.04	-0.02	0.03	-0.06	0.03	0.11	0.03	0.13	0.04	0.02	0	0.02	0.03	0.08	-0.05	-0.02	0.01	0.03	0.02	0.1	0.05	0	-0.01	0.11	0.05	-0.07	0.11
BCL2L1	0.03	-0.1	-0.09	-0.23	0.04	-0.16	0.1	-0.22	-0.09	-0.08	0.02	-0.03	-0.23	-0.45	-0.12	-0.24	-0.13	-0.23	-0.26	0.07	-0.01	-0.22	-0.29	-0.1	-0.03	-0.11	-0.21	-0.15	-0.06	-0.16	-0.19	-0.21	-0.18	-0.27	-0.2	-0.16	0.1	0.04	-0.26	-0.25	0.06	-0.19	-0.36	-0.09	-0.06	-0.01	-0.25	0.01	-0.1
BCL2L10	0.08	0.05	0.02	0.1	-0.03	0.06	-0.1	0.04	0.02	0.02	0.18	0.03	0.1	0.12	0.05	0.1	-0.02	0.11	-0.02	0.06	-0.09	0	0.01	0.09	0.03	0.01	-0.03	0.02	0.05	0.1	0.07	0.07	-0.11	0.06	0.09	0.03	0.05	-0.07	0.09	0	-0.02	0.04	0.07	0.05	0.08	0.06	0.05	0.15	0.11
BCL2L11	-0.08	0.12	0.04	0.15	0	0.09	-0.14	0.1	0.13	0.01	0.17	0	0.15	0.15	0.08	0.22	0.04	0.17	0.07	0.07	-0.05	0.17	0.11	0.18	0.12	0.09	0.01	0.03	0.1	0.18	0.13	0.09	0.24	0.18	0.16	0.13	0.03	-0.04	0.33	0.07	-0.02	0.07	0.21	0.08	0.13	0.01	0.15	0	-0.02
BCL2L12	0.03	-0.02	0.01	0.13	-0.05	0.07	-0.09	0	-0.04	-0.02	0.02	-0.02	0.06	0.17	0.05	0.05	-0.01	0.17	0.03	-0.08	0.08	-0.03	0.02	0.04	0.02	-0.05	-0.05	0.02	0.16	0.17	0.15	0.03	0.06	0.01	0.15	-0.01	0.05	0.03	0.08	0.02	0.02	0.02	0.13	0.03	0.03	0.1	-0.06	0.01	0.04
BCL2L13	0	-0.09	-0.16	-0.09	-0.08	-0.06	0.01	-0.19	-0.12	-0.06	-0.02	-0.04	-0.08	-0.14	-0.02	-0.16	-0.13	-0.16	-0.09	-0.07	-0.02	-0.18	-0.12	-0.06	-0.06	-0.14	-0.12	0	-0.02	-0.07	-0.09	-0.15	-0.08	-0.1	-0.12	-0.1	0.11	0.04	-0.27	-0.12	0.08	-0.02	-0.1	-0.07	-0.09	0.05	-0.21	0.11	-0.01
BCL2L14	-0.17	-0.06	-0.1	0.11	-0.04	0.04	0.01	-0.01	-0.03	-0.02	0.19	0.01	0.05	0.15	-0.07	0.04	0.03	0.2	-0.1	0.14	-0.14	0.01	-0.1	0.08	0.07	-0.1	-0.12	-0.02	-0.01	0.1	0.04	-0.01	0.12	0.03	0.09	0.04	-0.03	-0.04	0.14	0	0.02	0.01	0.06	-0.02	0.03	0.04	0.09	0.01	0.09
BCL2L15	-0.14	0.02	0.07	0.13	-0.05	0.11	-0.08	0.06	0.07	0	0.08	-0.03	0.15	0.12	-0.03	0.11	0.01	0.19	0.05	0.05	0.02	0.08	0.06	0.18	0.11	0.04	-0.04	-0.03	0.11	0.16	0.09	0.09	0.23	0.14	0.15	0.1	0	0	0.24	0.08	-0.01	0.06	0.14	0.03	0.11	-0.01	0.12	-0.03	0.07
BCL2L2	-0.07	-0.07	-0.26	-0.13	0.1	-0.15	0.26	-0.23	-0.15	-0.04	0.07	0.03	-0.22	-0.14	-0.12	-0.25	-0.09	-0.15	-0.2	0.18	-0.12	-0.22	-0.22	-0.16	-0.13	-0.15	-0.16	-0.09	-0.1	-0.23	-0.23	-0.17	-0.17	-0.15	-0.21	-0.13	0.07	0.11	-0.27	-0.16	0.03	-0.13	-0.26	-0.09	-0.15	0.02	-0.22	0.07	-0.02
BCL3	-0.05	-0.05	-0.08	-0.16	0.02	-0.07	0.04	-0.09	-0.15	-0.01	0	0	-0.17	-0.23	-0.05	-0.25	0.05	-0.1	-0.08	-0.07	0	-0.15	-0.21	-0.2	-0.05	-0.07	-0.09	0.08	-0.12	-0.12	-0.09	-0.16	-0.03	-0.22	-0.13	-0.18	0.09	0.04	-0.3	-0.13	0.07	-0.12	-0.23	-0.07	-0.08	0.07	-0.24	0.07	0.06
BCL6	-0.07	-0.09	-0.03	-0.14	0.03	0	0.1	-0.04	-0.01	-0.02	-0.04	-0.06	-0.14	-0.11	-0.09	-0.05	0	-0.06	-0.07	-0.15	-0.04	-0.06	-0.11	-0.17	-0.05	-0.05	-0.02	0.1	-0.1	-0.07	-0.06	-0.08	-0.11	-0.11	-0.12	-0.06	0.04	0.08	-0.16	0.02	0.03	-0.02	-0.16	-0.05	-0.09	0.01	-0.04	-0.08	-0.01
BCL6B	0.09	0.09	0.08	0.13	-0.05	0.1	-0.09	0.15	0.09	0.02	0.1	-0.03	0.16	0.2	0.03	0.15	0.06	0.22	0.08	-0.03	-0.03	0.13	0.11	0.11	0.09	-0.01	-0.02	0.04	0.11	0.13	0.14	0.12	0.12	0.13	0.13	0.04	-0.01	0.02	0.23	0.09	-0.02	0.11	0.16	0.05	0.08	0	0.12	0.12	0.08
BCL7A	0.03	0.13	0.08	0.22	-0.01	0.17	-0.18	0.23	0.22	0.09	0.15	0.05	0.28	0.29	0.11	0.28	0	0.23	0.15	0.08	-0.06	0.28	0.22	0.25	0.07	0.15	0.05	0.02	0.12	0.15	0.14	0.2	0.2	0.28	0.19	0.19	-0.1	0.01	0.39	0.17	-0.07	0.09	0.31	0.16	0.18	-0.09	0.24	-0.04	0.07
BCL7B	0.1	0.01	0.01	0.03	-0.17	0.03	-0.13	-0.03	0.07	-0.01	-0.06	-0.01	0.05	-0.06	0.05	0	-0.03	-0.04	0.05	-0.05	0	-0.04	0.04	0.05	0.04	-0.03	-0.03	0.05	0.04	0.01	-0.01	-0.03	0.09	0.06	0.02	0.05	0.05	-0.02	-0.04	0.02	0.06	-0.04	0	0.01	0.06	0.05	0.05	0.06	-0.05
BCL7C	0.1	-0.03	-0.12	-0.16	0	-0.08	0.03	-0.19	-0.17	0.05	-0.11	0.02	-0.21	-0.23	-0.05	-0.26	-0.07	-0.13	-0.14	-0.06	0.02	-0.2	-0.18	-0.19	-0.07	-0.16	-0.11	-0.02	-0.06	-0.18	-0.09	-0.14	-0.07	-0.23	-0.21	-0.17	0.06	0.09	-0.32	-0.11	0.11	-0.08	-0.23	-0.11	-0.14	-0.03	-0.24	0.15	-0.1
BCL9	0.06	0.08	0.02	0.05	-0.01	0.07	0.06	0.08	-0.05	0	-0.02	0	0.06	0.14	-0.03	0.03	0	0.02	0.04	0.18	-0.07	0.09	0.08	0.08	-0.05	0.06	0.06	-0.02	0.01	-0.04	0	0.08	0.11	0.06	0.06	0.06	0	0	0.17	0.03	0.03	-0.02	0.1	0.09	0.1	-0.07	0.07	-0.04	-0.04
BCL9L	-0.06	-0.17	-0.23	-0.31	0.03	-0.2	0.21	-0.26	-0.28	-0.03	0.07	0.04	-0.3	-0.41	-0.13	-0.4	-0.12	-0.32	-0.31	0.02	-0.05	-0.31	-0.37	-0.22	-0.12	-0.27	-0.23	-0.07	-0.22	-0.3	-0.26	-0.32	-0.06	-0.31	-0.32	-0.25	0.1	0.03	-0.49	-0.32	0.09	-0.22	-0.48	-0.17	-0.21	0.07	-0.38	0.05	0
BCLAF1	-0.06	0.14	0.17	0.29	0.11	0.2	-0.02	0.13	0.17	0.09	0.02	0.02	0.31	0.3	0.13	0.31	0.06	0.34	0.23	0	0.08	0.27	0.34	0.22	0.11	0.29	0.21	0.06	0.13	0.25	0.21	0.23	0.15	0.3	0.26	0.24	-0.08	-0.08	0.36	0.21	0.01	0.21	0.38	0.2	0.17	-0.1	0.26	-0.06	0.07
BCMO1	-0.11	-0.04	-0.05	-0.06	0	0	0.04	-0.06	-0.04	0	0.17	0.03	-0.04	-0.04	-0.05	-0.06	-0.08	-0.1	-0.13	0.18	-0.21	-0.07	-0.16	-0.01	0	-0.1	-0.14	-0.05	-0.06	-0.08	-0.03	-0.03	-0.08	-0.1	-0.06	-0.04	0.06	-0.03	0	-0.09	0.02	-0.05	-0.1	-0.04	-0.01	-0.05	-0.07	-0.06	-0.03
BCO2	0.04	0.02	0	0.11	0.05	0.08	0.08	0.04	0.05	0.05	0.1	0.02	0.08	0.12	0.04	0.06	-0.04	0.08	-0.03	0.02	0.02	0.06	-0.01	0.06	0.08	-0.06	0	-0.02	0.02	0.1	0.02	0.06	0.06	0.1	0.08	0.04	-0.07	0.12	0.07	0.03	0.03	0.12	0.05	0.03	0.02	0	0.04	0.09	0.09
BCOR	0.09	0.21	0.2	0.28	0	0.19	-0.15	0.3	0.28	0.07	0	0.02	0.31	0.35	0.16	0.39	0.1	0.25	0.31	0.03	0.1	0.39	0.37	0.26	0.14	0.34	0.2	0.08	0.15	0.24	0.24	0.32	0.15	0.31	0.31	0.3	0	-0.06	0.5	0.26	-0.09	0.16	0.42	0.2	0.23	-0.01	0.38	-0.03	0.02
BCORL1	0.06	0.05	0.16	0.24	0.01	0.12	-0.16	0.13	0.09	0.08	-0.07	0.02	0.21	0.19	0.08	0.18	0.08	0.18	0.12	-0.06	0.09	0.14	0.23	0.18	0.11	0.07	0.07	-0.04	0.16	0.2	0.1	0.2	0.31	0.14	0.23	0.07	0.01	-0.08	0.28	0.15	-0.02	0.08	0.28	0.15	0.13	0.07	0.15	-0.07	0.02
BCORP1	0.04	0.01	0.06	0.03	0.01	0.02	-0.01	-0.04	0.06	0.02	0.01	0.02	0.02	0.06	-0.03	0.04	-0.02	0.1	-0.01	-0.05	0.01	-0.03	-0.02	-0.05	0.02	-0.04	0	0.01	0	0.01	0.02	0.05	0.05	-0.06	0.03	-0.04	-0.08	0.07	0.02	0.06	0.03	0.03	0.04	-0.03	0.02	-0.02	0.03	0.1	0.07
BCR	-0.01	0.08	-0.1	0.08	-0.03	0.11	-0.05	0.06	0.05	-0.02	0.25	-0.01	0.1	0.15	-0.01	0.11	-0.06	0.13	-0.01	0.2	0.08	0.11	0.03	0.12	-0.01	0.07	-0.08	-0.02	0.04	0.15	-0.01	0.02	0.19	0.17	0.07	0.07	0.07	0.04	0.16	-0.05	-0.01	0.02	0.05	0.01	0.06	0.07	0.03	0.11	0.14
BCS1L	0.04	0.08	0.06	0.2	-0.03	0.13	-0.02	0.05	-0.03	0	-0.06	-0.04	0.14	0.23	0.04	0.12	-0.03	0.16	0.06	0.03	0.01	-0.01	0.07	0.05	0.06	0.04	0.02	-0.04	0.12	0.11	0.17	0.12	0.06	0.06	0.17	0.04	-0.02	0.03	0.22	0.13	0.08	0.08	0.25	0.04	0.06	-0.05	0.07	0.16	0.03
BDH1	-0.18	0.08	-0.04	0.13	-0.08	0.12	-0.12	0.09	0.07	-0.02	0.15	0.01	0.13	0.2	0.05	0.24	0.02	0.18	0.03	0.18	-0.16	0.08	0.05	0.15	0.08	0.01	-0.07	-0.03	0.06	0.13	0.08	0.11	0.25	0.16	0.16	0.11	-0.01	0.02	0.31	0.07	-0.02	0.07	0.2	0.1	0.14	0.04	0.2	-0.05	-0.01
BDH2	0.02	0.03	0.14	0.08	-0.01	0.13	-0.07	0.08	0.1	0.07	-0.09	-0.03	0.17	0.11	0.02	0.16	0.07	0.08	0.17	-0.06	0.11	0.16	0.15	0.06	0.03	0.13	0.16	0.11	0.02	0.16	0.13	0.11	-0.05	0.17	0.11	0.14	-0.09	0.09	0.18	0.12	0	0.08	0.16	0.03	0.09	0.02	0.16	-0.09	0.08
BDKRB1	-0.1	-0.11	-0.11	-0.08	0.02	-0.12	0.03	-0.13	-0.17	0.02	0.02	0.04	-0.08	-0.11	-0.04	-0.15	0.03	-0.05	-0.03	-0.03	0.02	-0.12	-0.1	-0.1	-0.05	0.01	0	0.03	-0.1	-0.06	-0.04	-0.07	-0.2	-0.1	-0.1	-0.13	0.03	-0.01	-0.21	-0.02	-0.02	-0.05	-0.13	-0.11	-0.09	0	-0.08	-0.01	0.04
BDKRB2	-0.03	-0.17	-0.16	-0.1	0	-0.16	0.04	-0.12	-0.16	-0.02	0.11	0.04	-0.1	-0.13	-0.07	-0.17	0	-0.11	-0.06	0.07	-0.08	-0.14	-0.19	-0.12	-0.1	-0.03	-0.09	0	-0.15	-0.1	-0.11	-0.13	-0.25	-0.13	-0.14	-0.16	-0.05	-0.05	-0.2	-0.1	-0.03	-0.1	-0.2	-0.14	-0.1	-0.03	-0.13	0.03	0.04
BDNF	-0.07	-0.17	0	-0.29	0.1	-0.21	0.13	-0.21	-0.2	0	-0.19	0.02	-0.27	-0.38	-0.1	-0.31	-0.05	-0.33	-0.14	-0.21	0.04	-0.22	-0.22	-0.25	-0.07	-0.23	-0.05	0	-0.17	-0.2	-0.15	-0.24	-0.21	-0.28	-0.27	-0.21	-0.02	0.01	-0.45	-0.15	0.04	-0.13	-0.37	-0.18	-0.2	-0.01	-0.27	-0.03	-0.03
BDP1	-0.08	0.13	0.09	0.22	0.06	0.11	0.01	0.21	0.15	0.07	0.03	0.04	0.23	0.21	0.1	0.21	0.06	0.26	0.15	-0.06	0.07	0.26	0.21	0.2	0.17	0.16	0.13	0.07	0.14	0.18	0.15	0.17	0.01	0.24	0.19	0.21	-0.04	-0.08	0.34	0.16	-0.02	0.2	0.29	0.17	0.11	-0.02	0.21	-0.09	0.09
BEAN1	0.09	0.01	-0.05	-0.15	0.02	-0.07	0.13	-0.08	-0.06	0.04	0.04	0.08	-0.11	-0.18	-0.02	-0.11	-0.13	-0.16	-0.09	0.02	0.04	-0.03	-0.15	-0.01	-0.09	-0.1	-0.08	0.01	-0.09	-0.06	-0.12	-0.12	-0.01	-0.07	-0.09	-0.14	0.02	0.06	-0.15	-0.07	0.07	-0.02	-0.16	-0.04	-0.07	0.03	-0.14	0.04	0
BECN1	-0.1	-0.04	-0.04	-0.04	-0.11	0.02	-0.09	-0.1	-0.09	-0.06	-0.04	-0.05	-0.08	0.02	-0.04	0.02	-0.02	-0.04	-0.05	0.04	0	-0.06	-0.09	0.01	-0.09	-0.09	0	-0.05	-0.03	-0.07	-0.02	-0.09	-0.08	-0.04	-0.03	0	0	0.03	-0.08	-0.03	0	-0.02	-0.05	-0.06	-0.03	0.02	0	-0.07	0.01
BEGAIN	0	0.03	-0.03	0.19	-0.01	0.02	-0.07	-0.04	-0.04	0.09	-0.05	0.06	0.18	0.14	0.03	0.06	0.05	0.07	0.11	0.01	-0.03	0.04	0.15	0.08	-0.04	0.08	0.04	0	0.02	0.12	0.06	0.07	0.05	0.15	0.1	0.01	-0.06	0.01	0.12	0.08	0.05	0.15	0.2	0.02	0	-0.06	0.04	0.04	0.04
BEND2	0.14	0.03	0.04	0.06	0.04	0.07	0	-0.03	-0.02	0.03	0.05	0.01	0.05	0.1	0.06	0.08	0.01	0.11	0.04	-0.04	-0.09	0.06	0.05	0.04	0	0.06	0.04	0.08	0.08	0.1	0.04	0.05	0.15	0.05	0.1	0.04	-0.05	0.05	0.08	0.07	0.04	0	0.08	0.03	0.01	-0.01	0.03	0.11	0.03
BEND3	0.01	0.15	0.04	0.25	-0.03	0.21	-0.06	0.18	0.14	0.02	0.15	0.03	0.24	0.36	0.07	0.27	0.05	0.31	0.13	0.21	-0.02	0.24	0.22	0.23	0.08	0.16	0.08	0.03	0.14	0.2	0.18	0.19	0.26	0.27	0.28	0.21	-0.08	-0.04	0.45	0.11	0.01	0.08	0.36	0.19	0.2	0.01	0.23	-0.01	0.03
BEND4	0.09	0.13	0.24	0.25	0.03	0.17	-0.12	0.15	0.16	0.06	0.01	-0.01	0.32	0.27	0.1	0.26	0.05	0.24	0.2	-0.07	0.09	0.23	0.24	0.17	0.12	0.26	0.14	0.08	0.11	0.23	0.16	0.22	0.08	0.26	0.23	0.1	-0.06	0.05	0.36	0.21	-0.02	0.13	0.33	0.12	0.18	-0.04	0.19	-0.02	0.07
BEND5	0.11	0.07	0.13	0.12	-0.03	0.13	-0.23	0.25	0.23	0.03	-0.15	0.05	0.15	0.15	0.1	0.21	0.03	0.1	0.18	-0.01	-0.05	0.19	0.22	0.1	0.04	0.11	0.2	0.06	0	0.09	0.01	0.14	-0.02	0.17	0.11	0.11	-0.09	-0.09	0.21	0.23	-0.02	0.09	0.16	0.09	0.1	-0.06	0.25	-0.05	-0.05
BEND6	0.12	0.03	0.15	-0.01	0.06	-0.06	-0.04	-0.01	0.01	0.09	-0.18	0.04	0.01	-0.16	0.02	-0.01	0.13	-0.1	0.11	-0.15	0.08	-0.01	0.11	-0.12	0	0.1	0.18	0.04	-0.05	0.03	-0.04	0.03	-0.11	-0.03	-0.02	-0.05	-0.01	0.04	-0.17	0.03	-0.02	0.01	0.01	0.02	-0.02	0.01	-0.01	-0.01	-0.01
BEND7	0	-0.06	-0.03	-0.15	0.01	-0.12	0.06	-0.14	-0.03	0.04	-0.06	-0.03	-0.15	-0.29	-0.08	-0.22	-0.09	-0.24	-0.18	-0.02	-0.04	-0.11	-0.15	-0.09	-0.05	-0.12	-0.13	-0.08	-0.06	-0.15	-0.15	-0.15	-0.16	-0.2	-0.19	-0.17	-0.06	-0.01	-0.23	-0.09	0.05	-0.14	-0.2	-0.05	-0.1	-0.08	-0.23	0.07	-0.09
BEST1	0.05	-0.02	-0.04	0.09	-0.07	0.05	-0.11	-0.01	-0.02	-0.06	-0.04	0.01	0.01	0.18	-0.05	0.09	0	0.05	0.02	0.01	-0.15	-0.06	0	0	0.08	-0.14	0.01	-0.05	0.05	0.01	0.04	0.07	-0.13	-0.02	0.07	0.09	-0.11	0.05	0.02	0.06	0.01	0.02	0.08	-0.01	0.07	0.06	0.14	0.02	-0.01
BEST2	-0.04	-0.06	-0.09	-0.04	-0.04	-0.08	0.03	-0.14	-0.08	-0.01	-0.05	-0.03	-0.07	-0.01	-0.07	-0.09	-0.06	0.02	-0.01	-0.12	0	-0.15	-0.04	-0.03	0	-0.04	-0.11	-0.06	-0.02	0.01	0.02	-0.06	-0.07	-0.07	-0.03	-0.09	-0.01	0.01	-0.08	-0.02	-0.01	-0.03	-0.05	-0.08	-0.08	0.05	-0.03	0.14	-0.03
BEST3	0.01	0.03	0.15	0.05	0.01	0.06	-0.07	0.17	0.1	0	-0.04	0.04	-0.02	0.08	0.04	0.07	0.03	0.09	0.02	-0.11	0.02	0.07	0.03	0.02	0.07	-0.04	0.02	0.03	0.04	0	0.06	0.06	-0.28	-0.06	0.09	0.02	-0.09	0.06	0.13	0.03	0.05	0.05	0.03	0.02	0.03	-0.06	0.11	0.01	-0.06
BEST4	-0.05	0.11	0.11	0.08	0.07	0.09	0.06	0.12	0.07	-0.01	0.05	-0.03	0.09	0.11	0	0.13	0.03	0.18	0.02	-0.02	0.1	0.1	0.07	0.04	0.04	0.09	0.04	0.01	0.04	0.11	0.05	0.12	0.35	0.12	0.15	0.09	0.04	-0.03	0.23	0.1	0.03	0.11	0.13	0.06	0.08	0.05	0.15	-0.15	0.02
BET1	-0.01	-0.08	0.06	-0.15	-0.07	-0.06	-0.04	-0.05	-0.02	-0.01	-0.14	-0.09	-0.11	-0.11	-0.02	-0.05	-0.05	-0.13	0.01	-0.11	0.07	-0.13	-0.14	-0.12	0	-0.15	-0.08	0.02	0.01	-0.06	0.02	-0.04	-0.2	-0.14	-0.1	-0.07	-0.03	-0.01	-0.13	-0.06	0.01	-0.08	-0.14	-0.1	-0.09	-0.03	-0.1	-0.04	-0.1
BET1L	-0.03	-0.04	0.03	-0.06	-0.04	0	-0.2	-0.02	-0.05	-0.05	-0.09	0.02	-0.09	-0.04	0.01	0.06	-0.05	-0.03	0.02	-0.13	0.02	-0.04	-0.04	-0.04	0.01	-0.06	0.07	0.03	-0.01	0	0.02	0	-0.04	-0.12	0.03	-0.06	0.03	-0.04	-0.15	0.03	0	-0.04	-0.07	-0.04	0.01	-0.01	0.01	-0.03	-0.05
BEX1	0.04	0	0.12	0.12	-0.02	-0.01	0.02	0.08	0.11	0.03	-0.15	-0.03	0.09	0.04	-0.01	0.12	0.14	0.06	0.16	-0.06	-0.02	0.1	0.2	0.04	0.01	0.2	0.21	0.08	0.02	0.06	0.05	0.15	-0.04	0.1	0.02	0.05	0.01	-0.11	0.11	0.15	-0.05	0.03	0.17	0.02	0	-0.04	0.2	-0.05	0
BEX2	0.05	-0.01	0.01	-0.07	0.01	-0.12	-0.03	-0.07	-0.01	0	0.03	-0.02	-0.06	0.01	-0.04	-0.05	-0.02	-0.1	-0.13	0.18	-0.13	-0.05	-0.05	-0.09	-0.08	0	-0.05	-0.06	-0.07	-0.12	-0.08	-0.03	-0.25	-0.07	-0.1	-0.04	-0.02	-0.02	0.04	-0.06	0	-0.04	-0.05	0.03	-0.03	-0.1	-0.06	0.04	-0.11
BEX4	0.08	0.02	0.13	-0.01	-0.04	-0.06	-0.18	-0.02	0.08	0.07	-0.12	-0.02	0.02	-0.04	0.01	0.1	0.05	-0.06	0.02	0.05	-0.04	0.09	0.12	-0.01	-0.01	0.09	0.11	-0.01	-0.03	0.02	-0.03	0.05	-0.19	0.05	-0.05	0.04	0.02	-0.11	0.05	0.07	-0.01	0	0.03	0.06	0.04	-0.07	0.06	-0.03	-0.08
BEX5	0	0	-0.01	-0.05	0.02	-0.04	-0.02	-0.07	-0.01	-0.06	0.02	0.04	-0.08	-0.02	-0.05	-0.04	0	-0.04	-0.12	0.21	-0.05	-0.07	-0.04	-0.05	-0.04	-0.04	-0.12	-0.03	-0.02	-0.06	-0.05	0	-0.09	-0.1	-0.05	-0.04	0.03	0.06	0.03	-0.07	-0.05	-0.07	-0.06	-0.02	-0.03	-0.02	-0.03	0.07	-0.05
BFAR	0	-0.02	0.02	-0.15	-0.01	-0.07	-0.01	-0.05	-0.07	-0.07	-0.15	-0.06	-0.16	-0.08	0.01	-0.08	-0.07	-0.14	-0.02	-0.19	0.03	-0.12	-0.08	-0.11	-0.04	-0.14	0.04	0.05	-0.01	-0.06	-0.04	-0.07	0.04	-0.1	-0.1	-0.04	-0.07	0.11	-0.16	-0.06	-0.03	-0.07	-0.15	-0.07	-0.03	0	-0.02	-0.07	-0.05
BFSP1	0.07	-0.02	-0.2	-0.19	0.02	-0.1	0.23	-0.17	-0.13	-0.05	0.02	-0.02	-0.25	-0.22	-0.08	-0.24	-0.1	-0.3	-0.15	0.13	-0.09	-0.23	-0.27	-0.13	-0.08	-0.2	-0.16	-0.07	-0.15	-0.23	-0.17	-0.22	-0.11	-0.22	-0.19	-0.09	0.04	0.11	-0.26	-0.2	0.07	-0.1	-0.28	-0.07	-0.1	-0.03	-0.23	0.03	-0.09
BFSP2	0.04	0.11	0.14	0.12	-0.08	0.14	-0.22	0.12	0.12	0.06	-0.02	0.02	0.12	0.14	0.1	0.19	0.1	0.09	0.16	-0.13	0.04	0.23	0.15	0.09	0.15	0.11	0.09	0.11	0.04	0.17	0.19	0.18	0.02	0.12	0.18	0.17	-0.1	0.12	0.12	0.2	-0.02	0.13	0.15	0.06	0.12	0.02	0.23	0.05	0.03
BGN	0.14	-0.03	0.07	0.02	-0.02	-0.01	-0.03	-0.1	-0.09	0.02	-0.08	-0.02	0.04	-0.05	0.02	-0.02	-0.12	0.05	0.07	-0.07	0	-0.03	0.06	-0.01	0.01	0.03	0.14	0.08	-0.07	0.03	0.05	-0.01	0.05	-0.01	-0.03	-0.07	-0.02	-0.03	-0.1	0.02	-0.02	0.02	-0.03	-0.03	-0.04	-0.06	0.02	0	0.06
BHLHB9	-0.01	0.02	-0.02	-0.05	0.05	-0.06	0	0	-0.04	0.15	0	0.05	0	-0.1	-0.01	-0.09	0.02	-0.03	-0.07	0.15	0.03	0	0.04	-0.03	-0.06	0.09	0.03	0	-0.05	-0.12	-0.03	-0.01	-0.13	0.02	-0.12	-0.12	-0.04	-0.04	-0.01	-0.04	0.05	-0.02	-0.09	0.05	-0.02	-0.1	-0.09	-0.03	0
BHLHE22	0.04	0.11	0.07	0.11	-0.03	0.11	-0.1	0.05	0.09	0.05	0.03	0.03	0.1	0.2	0.02	0.19	0.04	0.18	0.03	0.05	-0.11	0.09	0.02	-0.01	-0.06	0.06	-0.01	0.09	0.05	0.05	0.09	0.06	0.02	0.06	0.07	0.06	-0.09	-0.06	0.3	0.06	0.01	0.13	0.17	0	0.06	-0.03	0.15	0.15	-0.04
BHLHE23	0.06	0.09	0.11	0.08	-0.03	0.09	-0.01	0.03	0.06	0.02	0.09	0	0.1	0.07	0.06	0.1	-0.06	0.19	0.03	0.04	0.01	0.03	0.07	0.01	0.03	0.05	0.03	-0.01	0.1	0.1	0.09	0.09	-0.11	0.06	0.07	0.07	-0.08	0.04	0.08	0.01	0.04	0.04	0.09	0.04	0.09	-0.03	0.03	0.03	0.04
BHLHE40	-0.1	-0.12	-0.17	-0.21	-0.06	-0.13	0.05	-0.15	-0.16	-0.06	0	0	-0.23	-0.17	-0.08	-0.23	-0.07	-0.2	-0.18	-0.09	0.07	-0.18	-0.22	-0.18	-0.05	-0.13	-0.14	-0.04	-0.05	-0.16	-0.19	-0.21	-0.08	-0.23	-0.2	-0.2	-0.04	-0.11	-0.27	-0.21	0.02	-0.11	-0.3	-0.13	-0.16	0.04	-0.29	-0.03	-0.03
BHLHE41	0.03	-0.06	-0.11	-0.22	-0.06	-0.13	-0.02	-0.13	-0.11	-0.08	-0.11	0	-0.2	-0.16	-0.08	-0.19	-0.06	-0.17	-0.15	-0.04	-0.08	-0.17	-0.23	-0.14	-0.11	-0.09	-0.08	0.02	-0.12	-0.19	-0.13	-0.2	-0.07	-0.23	-0.16	-0.16	0.05	0	-0.25	-0.13	0.02	-0.14	-0.29	-0.12	-0.13	0.02	-0.17	-0.02	-0.06
BHMT	0.04	0.02	-0.02	-0.01	0.01	0.02	0.05	0.05	0.04	0.01	0.06	0.03	0.08	0.07	0.01	0.03	0.04	0.02	-0.01	-0.02	-0.08	-0.01	0.05	0.04	0.15	-0.08	-0.01	0	-0.01	0	0.03	0.06	-0.01	0.02	0.1	0.01	-0.01	0.05	0.08	0.02	-0.01	0.1	0.03	0.03	0.01	0.05	0.04	0.02	0.01
BHMT2	0.02	0	0.06	0.06	0.03	0	-0.14	0.08	0.06	0.04	-0.13	0	0	-0.07	-0.02	0	0.12	-0.02	0.07	-0.08	-0.09	0.01	0.04	0	0.06	0.05	0.06	0.01	0.06	0.01	0.02	0.09	-0.03	-0.04	0.03	0.02	0.04	-0.05	-0.06	0.02	0	0.01	0.03	-0.01	-0.02	0	0.07	-0.05	0
BICC1	-0.05	-0.16	-0.07	-0.27	-0.01	-0.19	0.11	-0.16	-0.09	-0.05	-0.13	-0.02	-0.27	-0.37	-0.15	-0.31	-0.05	-0.32	-0.18	-0.03	-0.14	-0.28	-0.25	-0.23	-0.11	-0.23	-0.11	-0.03	-0.08	-0.25	-0.21	-0.22	-0.18	-0.31	-0.29	-0.13	-0.03	-0.09	-0.4	-0.19	0.05	-0.22	-0.35	-0.22	-0.23	-0.01	-0.24	-0.1	-0.12
BICD1	0.03	0.02	0.11	-0.03	0	-0.04	0	0.03	0.11	0.04	-0.17	-0.03	-0.01	-0.03	-0.03	-0.08	-0.05	-0.06	0.05	-0.12	0.06	0.04	0	-0.06	-0.05	0.01	0.05	0.06	-0.09	0	-0.08	-0.02	-0.11	-0.02	-0.07	-0.02	-0.09	0.11	-0.03	-0.01	0.05	-0.05	-0.02	0.04	-0.02	-0.05	0.01	0	0
BICD2	0	-0.07	-0.06	-0.01	0.02	-0.06	-0.01	-0.12	-0.18	0.05	-0.02	-0.03	-0.04	-0.04	0.01	-0.09	-0.02	-0.02	-0.01	-0.24	0.11	-0.12	-0.05	-0.14	-0.05	-0.17	0.01	0.08	0.02	0.01	-0.02	-0.08	-0.15	-0.03	-0.11	-0.16	-0.1	-0.04	-0.2	0.03	0.05	0.03	-0.05	-0.06	-0.12	0	-0.15	0.01	0.09
BID	0.02	-0.01	-0.03	0.13	-0.05	0.02	-0.11	0.01	0.06	0.03	0.12	-0.03	0.16	0.02	0.05	0.02	-0.01	0.1	0.09	0.08	-0.02	-0.01	0.08	0.11	0.01	0.02	-0.06	0.03	0.05	0.15	0.03	0.01	0.05	0.16	0.05	0.02	-0.06	-0.06	0.01	0.01	0.03	0.04	0.08	-0.01	0	0.02	-0.05	0.05	0.09
BIK	-0.06	0.03	-0.17	-0.05	-0.05	0.01	-0.02	-0.09	-0.05	-0.08	0.31	0	-0.05	-0.06	-0.08	0	-0.05	-0.04	-0.17	0.28	-0.15	-0.07	-0.22	0.03	0	-0.18	-0.24	-0.07	-0.05	-0.05	-0.05	-0.07	0.08	-0.04	-0.04	0	0.01	-0.06	0.02	-0.1	-0.04	-0.06	-0.09	-0.04	0	0.09	-0.06	-0.04	0.03
BIN1	0.05	-0.11	-0.02	-0.13	-0.01	-0.14	0.15	-0.1	-0.05	-0.03	-0.15	-0.02	-0.13	-0.27	-0.08	-0.27	-0.09	-0.21	-0.12	0	-0.12	-0.25	-0.16	-0.09	-0.04	-0.18	-0.04	-0.09	-0.07	-0.11	-0.15	-0.14	0	-0.24	-0.16	-0.16	-0.05	0.05	-0.29	-0.12	0.06	-0.11	-0.21	-0.1	-0.12	-0.02	-0.22	0.02	-0.11
BIN2	0.08	0.14	0.13	0.18	-0.04	0.2	-0.11	0.19	0.19	0.02	0.15	0.02	0.24	0.24	0.09	0.25	0.07	0.27	0.16	0.03	0.05	0.19	0.18	0.21	0.12	0.18	0.04	0	0.13	0.26	0.18	0.2	0.13	0.23	0.23	0.16	0.08	0.03	0.32	0.07	-0.06	0.15	0.26	0.07	0.17	0.09	0.19	0	0.06
BIN3	0.05	0.03	0.01	0.08	-0.12	0.11	-0.22	0.01	0.07	-0.03	-0.05	-0.05	0.07	0.18	0.04	0.16	0.05	0.16	0.2	-0.11	0.09	0.01	0.12	0.07	0	-0.01	0.15	0.03	0.1	0.14	0.12	0.07	0.27	0.14	0.05	0.18	-0.11	0.06	0.08	0.12	0.01	0.03	0.13	0	0.08	0.07	0.18	-0.02	0.05
BIRC2	-0.01	-0.08	0.01	-0.18	0.03	-0.11	0.14	-0.2	-0.19	-0.02	-0.07	-0.02	-0.22	-0.24	-0.1	-0.25	0	-0.15	-0.12	-0.17	0.07	-0.23	-0.17	-0.21	-0.01	-0.19	-0.05	0.02	-0.05	-0.15	-0.13	-0.16	-0.19	-0.24	-0.19	-0.13	0.01	0.1	-0.35	-0.1	0.07	-0.15	-0.24	-0.15	-0.2	0.11	-0.2	0.04	0.05
BIRC3	-0.02	-0.06	0.03	-0.06	0	-0.05	0.06	-0.14	-0.1	-0.05	0.08	-0.04	-0.05	-0.11	-0.07	-0.12	-0.02	-0.04	-0.1	-0.07	-0.04	-0.17	-0.21	-0.06	0.02	-0.19	-0.16	0.03	-0.03	0.03	-0.02	-0.08	-0.11	-0.18	-0.05	-0.06	-0.03	0.09	-0.17	-0.08	0.04	-0.09	-0.12	-0.05	-0.05	0.07	-0.13	0.09	0.13
BIRC5	0.12	0.06	0.1	0.14	-0.02	0.03	-0.05	0.02	0.01	0.09	-0.06	-0.05	0.09	0.05	0.05	0.03	-0.02	0.11	0.06	-0.09	0.08	0.01	0.11	-0.01	-0.02	0.06	0.02	0.03	0.06	0.09	0.05	0.07	0.05	0.07	0.05	0.01	-0.06	0	0.11	0.09	0.05	0.04	0.15	0.04	0.01	-0.03	-0.01	0.11	0.03
BIRC6	-0.1	0.03	0.12	0.13	-0.05	0.13	-0.06	0.12	0.11	0.03	0.15	0.01	0.19	0.2	0.04	0.17	0.04	0.14	0.11	0.07	0.06	0.17	0.1	0.19	0.11	0.1	0.09	0.03	-0.05	0.16	0.12	0.09	0.24	0.17	0.15	0.13	-0.06	-0.01	0.26	0.05	-0.06	0.11	0.2	0.1	0.08	-0.01	0.16	-0.05	0.05
BIRC7	0.12	-0.01	-0.09	-0.07	-0.05	0.01	-0.02	-0.06	-0.03	0.01	-0.04	-0.06	-0.04	0.06	-0.06	0.01	0	-0.05	-0.07	-0.03	-0.03	-0.03	-0.07	-0.03	0	-0.11	-0.06	-0.06	0.05	-0.04	0.04	-0.03	-0.1	-0.06	0.01	0	-0.01	0	0	-0.01	0	0.05	0	-0.02	-0.01	0.07	0.01	0.05	-0.04
BIVM	0	-0.08	0.06	-0.03	0.02	-0.07	-0.02	-0.05	0.05	0.04	-0.14	0	-0.04	-0.06	-0.02	-0.1	0.01	-0.06	0.04	-0.07	0	-0.03	0.04	-0.04	0.02	0.04	0.06	-0.09	-0.02	-0.07	-0.1	0.01	-0.16	-0.05	-0.05	-0.04	-0.06	0.03	-0.07	-0.04	0.01	-0.04	-0.05	-0.04	-0.1	-0.1	-0.03	0	-0.04
BLCAP	-0.04	-0.06	-0.18	-0.21	0.01	-0.1	0.11	-0.15	-0.1	-0.04	0.19	0.06	-0.18	-0.12	0.03	-0.14	-0.16	-0.1	-0.18	0.12	-0.1	-0.17	-0.22	-0.06	-0.07	-0.19	-0.17	0.01	-0.16	-0.12	-0.12	-0.16	-0.02	-0.17	-0.14	-0.16	0.05	0	-0.15	-0.12	-0.01	-0.06	-0.29	-0.07	-0.06	-0.05	-0.16	0.05	-0.03
BLID	-0.06	-0.09	-0.01	-0.13	-0.01	-0.08	-0.04	-0.07	-0.13	0.04	-0.16	0.02	-0.15	-0.16	-0.09	-0.18	0.07	-0.13	0.02	-0.27	0.16	-0.12	-0.09	-0.19	-0.04	-0.11	0.03	0.06	-0.1	-0.06	-0.08	-0.12	-0.27	-0.11	-0.17	-0.08	-0.04	-0.04	-0.31	-0.02	0.05	-0.03	-0.2	-0.1	-0.14	0.03	-0.12	-0.06	0.01
BLK	0.05	0.09	0.13	0.14	-0.04	0.16	-0.15	0.19	0.12	0.04	0.04	-0.01	0.14	0.21	0.08	0.25	0.1	0.25	0.11	-0.07	0.06	0.22	0.11	0.13	0.06	0.1	0.08	0.11	0.05	0.22	0.14	0.12	0.15	0.13	0.19	0.09	-0.02	0.06	0.29	0.17	0.01	0.19	0.16	0.1	0.16	0.06	0.18	0.05	0.04
BLM	0.04	0.1	0.15	0.36	-0.01	0.17	-0.16	0.19	0.18	0.02	0.08	0	0.31	0.33	0.13	0.37	0.07	0.35	0.22	0.01	0.02	0.24	0.25	0.28	0.09	0.16	0.15	0.03	0.25	0.34	0.21	0.22	0.07	0.33	0.29	0.28	-0.1	-0.14	0.46	0.22	-0.01	0.21	0.46	0.13	0.19	0.04	0.29	-0.02	0.1
BLMH	0.04	0.13	0.22	0.32	-0.03	0.17	-0.27	0.22	0.17	0.05	-0.12	-0.01	0.35	0.34	0.17	0.35	0.08	0.31	0.37	-0.14	0.13	0.3	0.4	0.24	0.12	0.3	0.27	0.12	0.2	0.3	0.26	0.3	0.1	0.29	0.33	0.21	-0.12	0.02	0.35	0.26	-0.06	0.17	0.48	0.18	0.22	-0.06	0.25	-0.07	0.07
BLNK	-0.18	0.06	0.04	0.07	-0.02	0.09	-0.11	0.13	0.1	0	0.32	0.01	0.15	0.17	0.04	0.2	-0.02	0.16	0.01	0.13	-0.01	0.16	-0.01	0.11	0.09	0.04	-0.08	0.12	0.01	0.13	0.1	0.08	0.05	0.12	0.13	0.08	0.02	-0.02	0.24	0.09	-0.08	0.05	0.11	0.06	0.11	0.03	0.11	0.05	0.13
BLOC1S1	0.06	0.03	0.01	0.01	-0.05	0.04	-0.13	-0.03	0.03	0.04	0	-0.03	0.03	-0.02	-0.02	0.02	-0.05	0.02	-0.02	0.09	-0.11	-0.03	-0.02	0.03	0.05	-0.03	-0.03	0.03	-0.02	-0.05	0.08	-0.01	0.08	0	-0.02	0.02	0.06	0.02	0.09	0.06	0	0	0.01	-0.03	0.03	-0.03	0.04	0.1	-0.05
BLOC1S2	-0.07	0.05	-0.02	0.04	-0.08	0.05	-0.09	0.04	-0.01	0.04	0.02	-0.03	0.03	0.02	-0.01	0.02	0.02	0.06	0.03	-0.06	0.13	0.08	0.02	0.08	0.03	0.09	0.03	-0.01	0.08	0.03	0.03	-0.01	0	0.05	0.04	0.06	0.04	0.02	0.03	0.04	0.03	0.03	0.07	0.03	0.01	-0.03	-0.01	0.03	0.08
BLOC1S3	0.03	0	0.01	-0.03	-0.1	0.03	-0.19	0.05	0.07	-0.01	0.1	0.05	0.01	0.08	0.06	0.08	0	0.04	0.02	-0.05	0.02	0.02	0.02	0.08	0.01	0.01	-0.01	0.04	0.04	0.07	0.1	0.01	0.05	0.01	0.04	0.06	0.1	0.01	0.03	-0.05	-0.04	0.01	-0.04	-0.01	0.04	0.06	0.04	0.03	-0.05
BLOC1S4	-0.02	0.05	0.02	0.11	0	0.09	-0.03	0	0	0.01	-0.03	0.04	0.08	0.12	0	0.06	-0.02	0.1	0.01	-0.01	0.06	0.07	0.05	0.05	0.1	0.12	0.08	-0.02	0	0.05	0.02	0.04	0.17	0.02	0.1	0.04	0.01	-0.01	0.12	-0.01	0.06	0.03	0.13	0.04	0.04	-0.01	0.03	0.06	0.03
BLOC1S6	0.03	0.08	0.16	0.26	-0.04	0.18	-0.17	0.2	0.15	-0.01	-0.15	-0.05	0.24	0.23	0.13	0.31	0.04	0.27	0.27	-0.16	0.19	0.28	0.34	0.21	0.1	0.3	0.31	0.08	0.16	0.27	0.2	0.21	0.09	0.27	0.26	0.2	-0.08	0.01	0.29	0.22	-0.11	0.19	0.37	0.13	0.15	-0.02	0.31	-0.05	0.11
BLVRA	-0.04	-0.09	-0.11	-0.19	-0.02	-0.21	-0.09	-0.13	-0.09	0.03	-0.14	0.01	-0.21	-0.2	-0.02	-0.22	-0.06	-0.2	-0.09	-0.07	-0.01	-0.15	-0.17	-0.18	-0.05	-0.03	-0.08	0.01	-0.07	-0.2	-0.08	-0.16	-0.12	-0.23	-0.19	-0.13	0.05	0.02	-0.26	-0.19	0.07	-0.05	-0.21	-0.09	-0.13	-0.1	-0.21	0.09	-0.11
BLVRB	-0.04	-0.11	-0.22	-0.22	0	-0.12	0.13	-0.17	-0.15	-0.02	0.06	0.01	-0.23	-0.2	-0.05	-0.23	-0.07	-0.22	-0.21	-0.01	0.04	-0.21	-0.23	-0.14	-0.07	-0.12	-0.19	-0.1	-0.03	-0.16	-0.09	-0.2	-0.2	-0.26	-0.14	-0.19	0.21	0.08	-0.27	-0.26	0.08	-0.04	-0.27	-0.09	-0.12	0.01	-0.34	0.07	-0.07
BLZF1	0.02	-0.06	-0.07	-0.12	0.08	-0.1	0.12	-0.07	-0.06	0.02	-0.03	0.02	-0.11	-0.15	-0.09	-0.11	0.06	-0.13	-0.03	0.01	-0.07	-0.14	-0.06	-0.12	0	-0.13	-0.06	-0.06	-0.04	-0.09	-0.09	-0.04	-0.32	-0.13	-0.1	-0.04	0.05	-0.06	-0.15	-0.09	-0.04	-0.02	-0.15	-0.05	-0.07	0.04	-0.1	-0.1	-0.09
BMF	0.08	0.12	0.16	0.07	0.03	0.13	-0.04	0.22	0.2	0.03	0.08	-0.02	0.16	0.13	0.15	0.24	0.06	0.18	0.13	0.05	0.03	0.26	0.09	0.11	0.09	0.18	0.1	0.19	0.04	0.14	0.15	0.11	0.08	0.14	0.16	0.09	0.04	0.05	0.21	0.07	-0.02	0.13	0.12	0.1	0.17	0.04	0.17	0.16	0.01
BMP1	0.13	-0.18	-0.17	-0.23	-0.04	-0.2	0.04	-0.21	-0.16	-0.02	-0.07	0.02	-0.21	-0.26	-0.04	-0.3	-0.08	-0.26	-0.08	-0.14	0.03	-0.28	-0.2	-0.2	-0.15	-0.18	-0.03	0.02	-0.15	-0.15	-0.16	-0.24	-0.22	-0.22	-0.29	-0.25	-0.03	0.01	-0.48	-0.2	0.04	-0.14	-0.33	-0.15	-0.17	0.06	-0.31	0.05	-0.04
BMP10	0.02	0.02	0.03	0.09	-0.06	0.08	-0.02	0.05	0.03	-0.03	-0.04	-0.05	0.07	0.14	-0.01	0.06	-0.01	0.17	0.07	-0.09	0.09	0.02	0.04	0.02	-0.01	-0.01	0.07	0.02	0.02	0.09	0.07	0.09	0.08	0.06	0.06	0.03	0.07	0.03	0.03	0.11	-0.03	0.01	0.1	0	0	0.07	0.09	0.08	0.06
BMP15	0.04	0.04	0.03	-0.02	-0.02	0.03	0.04	0.09	-0.01	0.04	0.01	-0.05	0.05	0.08	0.01	0.02	-0.02	0.08	0.06	-0.01	0.05	0.09	0.05	0.07	0.01	0.03	0	0.05	0.06	0.04	0.07	0.08	0.09	0.08	0.04	0.02	0.04	0.04	0.02	0.02	0.01	0.05	-0.04	-0.01	0	0.01	0.04	0.09	0.05
BMP2	0	-0.08	-0.07	-0.07	0.02	-0.05	0.11	-0.08	0	0	0.11	0.03	-0.04	-0.06	-0.02	-0.08	0.03	-0.01	-0.08	0.12	-0.03	-0.1	-0.09	-0.05	-0.12	-0.07	-0.04	0.01	-0.06	-0.05	-0.03	-0.11	-0.11	-0.06	-0.08	-0.06	0.03	0.06	-0.16	-0.15	0.02	-0.09	-0.15	-0.11	-0.08	0.06	-0.1	0.06	0.15
BMP2K	0.05	0.1	0.19	0.17	-0.04	0.12	-0.22	0.11	0.15	0	-0.13	-0.03	0.12	0.06	0.06	0.17	0.1	0.21	0.23	-0.18	0.22	0.14	0.24	0.1	0.03	0.18	0.17	0.04	0.2	0.24	0.12	0.18	0.02	0.11	0.16	0.21	-0.02	-0.03	0.12	0.12	-0.05	0.08	0.17	0.05	0.11	0.01	0.2	-0.1	0.04
BMP3	-0.08	0.04	0.03	0.06	-0.05	0.11	-0.02	0.03	0.01	-0.02	0.09	-0.05	0.09	0.1	-0.01	0.09	-0.06	0.17	0.01	-0.07	0.04	0.05	0	0.06	0.09	0	-0.05	0.04	0.03	0.09	0.09	0.03	0	0.06	0.12	0.05	0.04	-0.02	0.16	0.04	0.02	0.08	0.08	0.02	0.02	0.05	0.05	-0.03	0.07
BMP4	0.03	-0.08	-0.17	-0.23	0.05	-0.1	0.14	-0.2	-0.14	-0.04	0.04	0.04	-0.17	-0.34	-0.11	-0.27	-0.13	-0.25	-0.19	0.09	-0.06	-0.19	-0.25	-0.05	-0.07	-0.15	-0.13	-0.04	-0.11	-0.19	-0.13	-0.24	0.05	-0.19	-0.17	-0.07	0.07	0.01	-0.31	-0.17	0.05	-0.15	-0.32	-0.16	-0.09	0	-0.15	-0.04	-0.03
BMP5	0.03	0.08	0.07	0.08	0.01	0.09	-0.03	0.1	0.07	0.07	0.12	0.05	0.09	0.08	0.07	0.05	0.04	0.08	0.06	-0.03	-0.04	0.05	0.02	0.09	0.08	-0.02	0	0.07	0.04	0.06	0.08	0.1	0.13	0.03	0.15	0.08	-0.04	-0.05	0.04	0.06	0.02	0.1	0.1	0.09	0.06	0.09	0.03	0.03	0.05
BMP6	0.07	0.05	0.03	-0.03	0.04	0.05	0	0.01	0.03	-0.04	-0.04	0	0	0.06	-0.05	0.02	0.01	-0.05	0	0.03	-0.04	0.02	0.01	-0.01	-0.02	0.03	0.06	-0.05	0.06	-0.02	0.07	0.02	0.01	-0.04	0.02	-0.02	-0.01	0.06	-0.01	-0.01	0.03	0.03	0.03	0	0.03	-0.02	-0.02	0.06	-0.08
BMP7	-0.05	0.03	-0.11	-0.03	0	0.04	0.05	-0.03	-0.06	-0.01	0.18	0.02	0.04	0.12	0.01	-0.05	-0.14	0.03	-0.08	0.13	-0.05	-0.03	-0.1	0.04	-0.04	-0.07	-0.13	-0.03	-0.03	-0.04	-0.01	-0.02	0.16	0.01	0.01	-0.01	-0.03	-0.04	0.03	-0.02	-0.01	0.03	0.01	0	0.07	-0.08	-0.06	0.02	-0.04
BMP8A	0.03	0.09	0.04	0.1	0.01	0.14	-0.06	0.09	0.04	0.02	0	0.03	0.09	0.18	0.02	0.14	0.06	0.16	-0.01	-0.02	-0.09	0.08	0.06	0.04	0.09	0.02	-0.01	0.03	0.09	0.08	0.12	0.09	-0.12	0.03	0.08	0.04	-0.04	0.06	0.23	0.08	0.01	0.08	0.1	0.03	0.04	-0.04	0.14	0.12	-0.04
BMP8B	-0.02	0.08	-0.01	0.15	-0.11	0.08	-0.05	0	0.04	-0.01	0.04	-0.02	0.07	0.25	0.06	0.18	-0.01	0.13	0.02	0.16	-0.12	0.09	0.03	0.12	0.08	-0.08	-0.04	0	0.1	0.09	0.07	0.07	0.14	0.07	0.12	0.09	-0.1	0.05	0.24	0.08	0.02	0.05	0.2	0.06	0.09	-0.01	0.12	0.06	-0.04
BMPER	0.11	-0.08	0.06	-0.16	0.09	-0.1	0.11	-0.07	-0.06	0.01	-0.18	-0.01	-0.12	-0.12	0.01	-0.2	-0.05	-0.08	-0.03	-0.2	0.1	-0.09	-0.04	-0.17	-0.1	0.06	0.06	0.02	-0.06	-0.09	-0.05	-0.08	-0.16	-0.14	-0.13	-0.13	0.01	0.11	-0.25	-0.02	0.07	-0.09	-0.2	-0.07	-0.14	-0.04	-0.12	0.04	-0.07
BMPR1A	-0.04	-0.03	-0.15	-0.13	0.04	-0.1	0.16	-0.14	-0.15	0.04	0.02	0	-0.14	-0.22	-0.07	-0.26	-0.1	-0.16	-0.12	0.02	-0.01	-0.08	-0.11	-0.1	0	-0.01	-0.06	-0.03	-0.07	-0.19	-0.11	-0.1	0.15	-0.13	-0.16	-0.1	0.03	0.04	-0.25	-0.09	0.05	-0.14	-0.17	-0.04	-0.11	-0.07	-0.21	-0.03	0
BMPR1B	0.01	-0.11	-0.16	-0.1	0.03	-0.11	0.21	-0.14	-0.13	-0.03	0.03	-0.07	-0.1	-0.05	-0.06	-0.18	-0.06	-0.13	-0.11	0.13	-0.15	-0.12	-0.18	-0.13	-0.03	-0.1	-0.09	-0.02	-0.09	-0.14	-0.07	-0.11	-0.16	-0.12	-0.18	-0.09	-0.09	-0.12	-0.16	-0.12	0.02	-0.11	-0.16	-0.08	-0.1	0	-0.13	-0.06	0.03
BMPR2	-0.05	-0.06	-0.03	-0.27	0.04	-0.14	0.17	-0.15	-0.16	0.02	-0.15	0.01	-0.22	-0.31	-0.07	-0.27	-0.05	-0.31	-0.12	-0.1	0.01	-0.13	-0.13	-0.23	-0.14	-0.02	-0.02	0.01	-0.2	-0.25	-0.13	-0.19	-0.19	-0.21	-0.26	-0.19	0.06	0.05	-0.32	-0.1	0.02	-0.11	-0.33	-0.12	-0.13	-0.03	-0.21	0.01	-0.08
BMS1	-0.05	0.01	0.01	0.15	0.01	0.03	-0.04	-0.01	0.01	0.01	0.09	-0.03	0.17	0.14	0.06	0.03	0.04	0.16	0.07	-0.03	0.15	0.04	0.11	0.13	0.12	0.04	0	-0.01	0.16	0.18	0.09	0.08	0.16	0.1	0.15	0.08	0	-0.04	0.11	0.04	-0.02	0.05	0.2	0.07	0.03	0.04	0	-0.01	0.13
BMX	-0.06	0.01	0.01	0.01	-0.03	0.04	-0.04	0.02	-0.01	0.02	-0.01	0	0.02	0.15	0	0.07	0	0.13	-0.02	-0.01	0	0.04	0.03	0.04	0.01	0.02	-0.03	0.01	0.01	-0.02	0.08	0.07	-0.09	0.02	0.05	0	0.02	-0.05	0.08	0.03	0.03	0.04	0.05	-0.02	0	0.02	0.06	-0.08	-0.07
BNC1	0.02	-0.07	0.02	0.04	0.06	-0.06	-0.01	-0.13	-0.11	0.02	0.08	-0.01	0.02	-0.02	0.03	-0.05	-0.05	0.01	0	-0.07	0.03	-0.05	-0.03	-0.03	-0.04	-0.06	0	0.07	0	0.06	0.01	0.01	-0.15	-0.06	-0.01	-0.09	-0.08	-0.03	-0.1	0	0.01	0.02	-0.01	-0.03	-0.07	-0.03	-0.09	0.04	0.16
BNC2	-0.02	-0.07	0.14	-0.12	-0.04	-0.1	-0.07	-0.01	-0.03	0	-0.32	-0.06	-0.11	-0.1	-0.02	-0.13	0.01	-0.11	0.05	-0.26	0.09	-0.07	-0.03	-0.16	-0.07	-0.01	0.08	0.07	-0.03	-0.08	-0.03	-0.05	-0.07	-0.14	-0.11	-0.08	-0.03	0	-0.19	-0.02	0.04	-0.05	-0.11	-0.08	-0.07	-0.03	-0.07	-0.04	-0.1
BNIP1	-0.04	-0.01	0.1	0.06	-0.01	0	-0.07	-0.02	-0.03	-0.06	-0.14	-0.02	0.04	0.02	0.05	-0.02	-0.07	0.01	0.03	-0.17	0.01	-0.06	0.05	0.01	0.08	0.03	0	-0.04	0.08	0.04	-0.01	-0.01	-0.25	-0.03	0.09	0	-0.01	0.03	-0.01	0.04	0.01	0	0.09	0.03	0	0	0	-0.06	-0.03
BNIP2	0.07	0.02	0.08	0.17	-0.03	0.08	-0.15	0.02	0.08	-0.04	-0.05	-0.04	0.13	0.11	0.09	0.18	0.02	0.12	0.18	-0.22	0.2	0.11	0.17	0.09	0.07	0.06	0.16	0.1	0.11	0.25	0.13	0.11	-0.03	0.14	0.15	0.12	-0.05	-0.11	0.04	0.14	-0.07	0.15	0.22	0.05	0.07	0.1	0.15	0.02	0.13
BNIP3	-0.06	-0.09	0.02	-0.12	0.01	-0.13	-0.02	0.01	-0.07	-0.01	-0.22	-0.04	-0.13	-0.16	-0.03	-0.2	-0.03	-0.16	-0.05	-0.16	0.03	-0.08	-0.07	-0.22	0.02	-0.07	0.01	0.07	-0.04	-0.19	-0.1	-0.1	-0.21	-0.16	-0.15	-0.17	-0.05	0.05	-0.19	-0.04	0.04	-0.04	-0.16	-0.08	-0.14	-0.09	-0.18	0	-0.08
BNIP3L	0.06	-0.03	0.11	-0.11	0.04	-0.02	0	0.01	-0.01	0.02	-0.21	-0.04	-0.05	-0.2	0.02	-0.07	-0.02	-0.13	0.05	-0.19	0.12	-0.03	0.04	-0.12	-0.02	0.01	0.08	0.03	-0.02	-0.05	-0.01	0.01	-0.12	-0.09	-0.13	-0.1	-0.05	0.09	-0.15	0.04	-0.01	-0.03	-0.13	-0.04	-0.09	-0.08	-0.06	-0.03	-0.06
BNIPL	-0.06	0.08	0.01	0.11	0.02	0.05	-0.08	0.05	0.01	0.09	0.17	0.05	0.14	0.09	0.05	0.13	-0.01	0.15	0	0.01	-0.04	0.07	0.06	0.11	0.1	-0.01	-0.04	0.03	0.07	0.13	0.1	0.11	0.14	0.12	0.11	0.04	0.01	-0.06	0.19	0.11	0.02	0.11	0.15	0.04	0.14	0.04	0.06	-0.02	0.06
BOC	0.11	-0.05	-0.01	-0.18	0.12	-0.08	0.2	-0.09	-0.09	0.05	-0.12	-0.01	-0.14	-0.18	-0.03	-0.17	-0.08	-0.15	-0.04	-0.07	-0.05	-0.11	-0.09	-0.19	-0.04	-0.01	0	0.02	-0.12	-0.19	-0.07	-0.11	-0.15	-0.13	-0.19	-0.16	0	-0.04	-0.19	0.01	0	-0.04	-0.15	-0.12	-0.1	-0.06	-0.1	0.03	-0.12
BOD1	-0.05	-0.08	-0.1	-0.2	0.1	-0.18	0.21	-0.14	-0.16	0	-0.14	0.03	-0.2	-0.3	-0.05	-0.37	-0.08	-0.3	-0.16	-0.05	-0.08	-0.27	-0.14	-0.21	-0.1	-0.13	-0.1	-0.07	-0.16	-0.28	-0.2	-0.2	-0.34	-0.22	-0.22	-0.18	-0.01	-0.04	-0.42	-0.13	0.09	-0.15	-0.26	-0.08	-0.2	-0.09	-0.25	0.01	-0.09
BOD1L1	-0.08	0.04	0.14	0.17	0.08	0.06	0.02	0.12	0.14	0.05	0.02	-0.03	0.16	0.12	0.03	0.19	0.11	0.18	0.14	-0.11	0.06	0.18	0.12	0.07	0.11	0.12	0.15	0.09	0.01	0.18	0.08	0.09	-0.08	0.15	0.11	0.14	-0.13	-0.05	0.22	0.12	-0.06	0.12	0.18	0.07	0.07	-0.01	0.18	-0.06	0.1
BOD1L2	-0.06	0.03	0	-0.01	0.02	0.07	0.08	0.01	-0.04	0	0.03	0.03	0	0.01	0.02	0.01	0.01	0.05	-0.01	-0.03	-0.01	0	-0.03	-0.02	0.02	-0.04	-0.05	0.07	0.01	0	0.02	0	-0.11	-0.01	-0.02	0.01	-0.09	-0.07	-0.05	-0.05	0.04	0.02	0.02	0	-0.01	0.03	0.04	0	-0.01
BOK	-0.08	-0.13	-0.24	-0.26	0.04	-0.17	0.14	-0.3	-0.27	-0.04	0.02	-0.03	-0.27	-0.29	-0.14	-0.38	-0.04	-0.29	-0.23	0.09	-0.05	-0.27	-0.27	-0.19	-0.13	-0.2	-0.17	-0.11	-0.12	-0.28	-0.18	-0.27	-0.11	-0.25	-0.21	-0.26	0.09	-0.03	-0.4	-0.22	0.07	-0.21	-0.35	-0.2	-0.15	0.03	-0.32	0.12	-0.03
BOLA1	0.21	0.16	-0.04	0.03	0.05	0.05	0.07	0.05	0.01	0.06	0.1	0.04	0.07	0.08	0.01	0.05	0.02	-0.04	-0.01	0.18	-0.06	0.13	0.04	0.08	0.06	0.07	0.02	-0.1	0.06	-0.02	0.02	-0.02	-0.09	0.07	0	0.04	-0.02	0	0.07	0.05	0.02	0.02	0.09	0.05	0.12	0	0.06	0.14	-0.04
BOLA3	-0.07	-0.03	-0.1	0	-0.08	-0.03	0.03	-0.11	-0.1	-0.04	-0.08	0	-0.11	0.07	-0.03	-0.09	-0.03	0.01	-0.12	-0.01	-0.05	-0.14	-0.1	-0.06	-0.01	-0.12	-0.06	-0.06	0.1	-0.07	0.02	-0.09	-0.01	-0.1	-0.03	-0.01	0.06	-0.02	-0.01	-0.05	0.09	-0.01	0.01	-0.01	-0.01	-0.03	-0.1	0.09	-0.1
BOLA3-AS1	0	-0.03	0.09	0.01	0.05	-0.02	0	0.03	0.07	0.02	-0.23	0.01	0.02	0.06	0	0.04	0.06	0.01	0.07	-0.15	0.07	0.05	0.15	-0.02	0	0.1	0.12	-0.03	0.08	0.02	0.03	0.07	0	0.02	-0.02	0.02	-0.1	0	0.03	0.08	-0.03	0.01	0.09	0.04	0.02	-0.05	0.05	-0.09	-0.08
BOLL	0.1	0.02	0	0.16	-0.06	0.07	-0.08	0	0.08	-0.01	0.08	0	0.15	0.16	-0.03	0.14	-0.03	0.17	0.05	0.05	0.07	0.02	0.09	0.1	0.09	0.11	0.02	0.01	0.09	0.18	0.11	0.1	0.04	0.09	0.17	0.09	0.04	0.05	0.22	0.1	-0.04	0.09	0.19	0.05	0.1	-0.02	0.12	0.06	0.13
BORA	-0.07	-0.01	0.01	0.24	0	0.09	-0.02	0.04	0.04	0.02	0.18	-0.02	0.13	0.26	0.04	0.12	0.01	0.28	0.04	-0.03	0.08	-0.01	0.03	0.12	0.06	-0.02	-0.04	0	0.1	0.24	0.08	0.06	-0.02	0.12	0.15	0.05	-0.09	0.01	0.21	0.09	0.02	0.08	0.2	0.05	0.02	0.07	0.04	0.01	0.12
BPESC1	0.06	0.07	0.09	0.17	0.13	0.09	0.14	0.06	0.13	0	0.07	-0.01	0.14	0.2	0.05	0.15	-0.01	0.17	0.14	-0.09	0.06	0.13	0.13	0.12	0.06	0.16	0.08	0.07	0.1	0.17	0.13	0.12	0.06	0.14	0.15	0.11	-0.01	-0.07	0.2	0.11	0.02	0.13	0.19	0.08	0.06	-0.04	0.17	0.03	0.09
BPGM	0.01	-0.01	0.07	-0.11	-0.01	-0.1	0	0	-0.01	0.03	-0.14	-0.01	-0.06	-0.08	-0.02	-0.03	0.02	-0.13	0.06	-0.11	-0.03	0.01	0.05	-0.09	-0.06	0.06	0.11	0.1	-0.03	-0.1	-0.05	-0.01	-0.24	-0.01	-0.08	-0.02	0.03	-0.09	-0.14	0.06	-0.01	-0.05	-0.08	0.02	-0.05	-0.02	0.05	0.01	-0.05
BPHL	0.01	0.02	-0.07	-0.07	0	-0.01	0.02	0	0	0.01	0.03	0.06	-0.06	0.01	-0.07	0.01	0.05	-0.03	-0.02	0.1	-0.02	-0.02	0.01	-0.06	-0.04	0	0	-0.03	-0.01	-0.13	0.02	0.02	-0.01	-0.03	0	0.05	-0.04	0.03	0.06	-0.02	0	-0.07	-0.01	0.05	0.02	0.01	0.05	-0.02	-0.08
BPI	0.01	0.02	0.07	0.15	-0.02	0.12	-0.03	0.12	0.06	-0.01	0.15	0.02	0.13	0.13	0.02	0.14	-0.03	0.14	0.06	0.07	-0.02	0.08	0.09	0.13	0.1	0.03	0.04	0.05	0.02	0.14	0.16	0.07	0.11	0.17	0.15	0.08	-0.01	0.01	0.12	0.15	-0.03	0.08	0.13	0	0.1	0.07	0.12	0.08	0.1
BPIFA1	0.02	0.04	0.01	0.06	0.03	0.1	-0.03	0.11	0.04	-0.02	0.02	0.05	0.07	0.04	0.04	0.08	0	0.02	0.02	-0.03	-0.06	0.07	0.05	0.05	0.01	-0.02	0.02	0.01	0.07	0.06	0.09	0.1	-0.07	0.03	0.11	0.11	0.06	0.01	0.05	0.07	-0.02	0.09	0.11	0.04	0.04	0	0.14	-0.05	0
BPIFA2	0.06	0	-0.09	-0.1	0.01	-0.01	0.02	-0.05	-0.05	-0.01	0.09	0.01	-0.1	-0.07	-0.02	-0.08	0	-0.12	-0.14	0.05	-0.11	-0.06	-0.12	-0.06	-0.01	-0.1	-0.15	-0.02	-0.04	-0.14	-0.06	-0.06	-0.04	-0.08	-0.07	-0.12	-0.01	0.04	-0.1	-0.05	-0.01	-0.03	-0.14	-0.02	0	0.01	-0.09	0.08	-0.01
BPIFA3	0	0.01	0.02	0	-0.08	0.03	-0.08	-0.05	-0.02	0	0.01	-0.04	-0.03	0.04	-0.01	0.04	0.02	0.08	-0.08	0	-0.03	-0.07	-0.06	0	0.06	-0.12	-0.08	-0.03	0.05	-0.01	0.02	0.03	0.14	-0.02	0	-0.05	-0.01	0.05	0.03	-0.02	0	0.05	-0.02	-0.01	-0.01	0.06	0	0.02	0.03
BPIFA4P	-0.02	0.08	0.08	0.1	-0.02	0.12	-0.02	0.16	0.02	0.01	0.06	-0.02	0.13	0.12	0.11	0.22	0.01	0.14	0.12	-0.07	0.02	0.16	0.12	0.15	0.13	0.15	0.07	0.08	0.09	0.14	0.2	0.12	0.09	0.12	0.15	0.11	0	-0.02	0.24	0.17	-0.05	0.11	0.17	0.08	0.08	0.01	0.17	-0.02	0
BPIFB1	0.02	0.03	-0.03	0.05	0.01	0.03	0.01	0.01	-0.03	0	0.08	0.02	0	0.08	-0.01	0.11	0.02	0.03	-0.05	0.06	-0.02	0.01	-0.04	-0.04	0.03	-0.08	-0.07	0.05	0.07	-0.01	0.05	-0.02	-0.13	0	0.02	-0.01	-0.01	0.03	0.05	0.06	0.01	-0.03	0.02	-0.03	-0.03	0.05	-0.01	0.03	0.08
[truncated: 17,012 more rows]
[truncated: 432 more columns]
